# Supplementary material for: Glucocerebrosidase is imported into mitochondria and preserves complex I integrity and energy metabolism
Source: Nat Commun. 2023 Apr 6;14:1930. doi: 10.1038/s41467-023-37454-4 (PMC10079970; doi:10.1038/s41467-023-37454-4)
Supplement: Supplementary file 4 — Supplementary Data 1 [file 41467_2023_37454_MOESM4_ESM.xlsx]

## Sheet: Limma_results_V3
	gene_name	protein_id	description	found.in.files	found.in.conditions	found.in.reps	max.qupm	average.top3	logFC	AveExpr	t	pvalue.limma	fdr.limma	B	pvalue.fdrtool	qval.fdrtool	lfdr.fdrtool	comparison	hit_annotation_method	pvalue	fdr	hit	hit_annotation	top3
1	PDIA4	P13667	Protein disulfide-isomerase A4 OS=Homo sapiens GN=PDIA4 PE=1 SV=2	1	4	3	25	7.58241	5.9726	24.8183	33.838	1.55178e-10	8.8168e-08	14.4633	0.973416	1	1	WT - Control	limma	1.55178e-10	8.8168e-08	TRUE	hit	7.58241
2	TECR	Q9NZ01	Very-long-chain enoyl-CoA reductase OS=Homo sapiens GN=TECR PE=1 SV=1	1	4	3	8	7.90307	5.76229	24.2526	31.9106	2.57468e-10	8.8168e-08	14.0684	0.97493	1	1	WT - Control	limma	2.57468e-10	8.8168e-08	TRUE	hit	7.90307
3	BIRC2	E9PMH5|Q13490	Baculoviral IAP repeat-containing protein 2 OS=Homo sapiens GN=BIRC2 PE=1 SV=1|Baculoviral IAP repeat-containing protein 2 OS=Homo sapiens GN=BIRC2 PE=1 SV=2	1	4	3	17	7.69396	5.2584	24.0707	31.0594	3.2511e-10	8.8168e-08	13.8819	0.975599	1	1	WT - Control	limma	3.2511e-10	8.8168e-08	TRUE	hit	7.69396
4	OS9	Q13438	Protein OS-9 OS=Homo sapiens GN=OS9 PE=1 SV=1	1	4	3	17	7.23085	6.64829	23.6543	31.0394	3.26925e-10	8.8168e-08	13.8774	0.975614	1	1	WT - Control	limma	3.26925e-10	8.8168e-08	TRUE	hit	7.23085
5	SLC25A3	Q00325|Q00325-2	Phosphate carrier protein, mitochondrial OS=Homo sapiens GN=SLC25A3 PE=1 SV=2|Isoform B of Phosphate carrier protein, mitochondrial OS=Homo sapiens GN=SLC25A3	1	4	3	8	7.74961	6.31848	24.0182	30.7213	3.57299e-10	8.8168e-08	13.8057	0.975864	1	1	WT - Control	limma	3.57299e-10	8.8168e-08	TRUE	hit	7.74961
6	SSR1	C9IZQ1|C9J3L8|C9J5W0|E9PAL7|P43307	Translocon-associated protein subunit alpha OS=Homo sapiens GN=SSR1 PE=1 SV=1|Translocon-associated protein subunit alpha OS=Homo sapiens GN=SSR1 PE=1 SV=1|Translocon-associated protein subunit alpha OS=Homo sapiens GN=SSR1 PE=1 SV=1|Translocon-associated protein subunit alpha OS=Homo sapiens GN=SSR1 PE=1 SV=1|Translocon-associated protein subunit alpha OS=Homo sapiens GN=SSR1 PE=1 SV=3	1	4	3	4	7.56879	5.57733	22.3968	30.5814	3.71648e-10	8.8168e-08	13.7737	0.975974	1	1	WT - Control	limma	3.71648e-10	8.8168e-08	TRUE	hit	7.56879
7	YTHDF2	A0A087WXZ3|Q9Y5A9	YTH domain-containing family protein 2 OS=Homo sapiens GN=YTHDF2 PE=1 SV=1|YTH domain-containing family protein 2 OS=Homo sapiens GN=YTHDF2 PE=1 SV=2	1	4	3	8	7.06581	5.59515	22.8634	30.2227	4.11452e-10	8.8168e-08	13.6908	0.976256	1	1	WT - Control	limma	4.11452e-10	8.8168e-08	TRUE	hit	7.06581
8	CLGN	O14967	Calmegin OS=Homo sapiens GN=CLGN PE=1 SV=1	1	4	3	9	7.02594	6.13376	24.0582	29.9935	4.39358e-10	8.8168e-08	13.6371	0.976436	1	1	WT - Control	limma	4.39358e-10	8.8168e-08	TRUE	hit	7.02594
9	TIMM21	Q9BVV7	Mitochondrial import inner membrane translocase subunit Tim21 OS=Homo sapiens GN=TIMM21 PE=1 SV=1	1	4	3	6	7.03591	5.14197	23.2218	29.8666	4.55707e-10	8.8168e-08	13.6071	0.976535	1	1	WT - Control	limma	4.55707e-10	8.8168e-08	TRUE	hit	7.03591
10	LAS1L	Q9Y4W2	Ribosomal biogenesis protein LAS1L OS=Homo sapiens GN=LAS1L PE=1 SV=2	1	4	3	5	6.67974	5.17278	22.3168	29.1531	5.61303e-10	8.8168e-08	13.4346	0.977096	1	1	WT - Control	limma	5.61303e-10	8.8168e-08	TRUE	hit	6.67974
11	PELO	Q9BRX2	Protein pelota homolog OS=Homo sapiens GN=PELO PE=1 SV=2	1	4	3	6	6.7685	5.14099	23.121	29.069	5.75444e-10	8.8168e-08	13.4139	0.977162	1	1	WT - Control	limma	5.75444e-10	8.8168e-08	TRUE	hit	6.7685
12	DNAJB11	Q9UBS4	DnaJ homolog subfamily B member 11 OS=Homo sapiens GN=DNAJB11 PE=1 SV=1	1	4	3	13	7.58627	5.11088	23.96	28.9639	5.93691e-10	8.8168e-08	13.3878	0.977245	1	1	WT - Control	limma	5.93691e-10	8.8168e-08	TRUE	hit	7.58627
13	TELO2	Q9Y4R8	Telomere length regulation protein TEL2 homolog OS=Homo sapiens GN=TELO2 PE=1 SV=2	1	4	3	13	7.12982	5.37682	23.3572	28.7552	6.31862e-10	8.8168e-08	13.3357	0.977408	1	1	WT - Control	limma	6.31862e-10	8.8168e-08	TRUE	hit	7.12982
14	STT3A	P46977	Dolichyl-diphosphooligosaccharide--protein glycosyltransferase subunit STT3A OS=Homo sapiens GN=STT3A PE=1 SV=2	1	4	3	10	7.29548	5.29775	23.3687	28.4815	6.86109e-10	8.8168e-08	13.2665	0.977623	1	1	WT - Control	limma	6.86109e-10	8.8168e-08	TRUE	hit	7.29548
15	UGGT1	Q9NYU2|Q9NYU2-2	UDP-glucose:glycoprotein glucosyltransferase 1 OS=Homo sapiens GN=UGGT1 PE=1 SV=3|Isoform 2 of UDP-glucose:glycoprotein glucosyltransferase 1 OS=Homo sapiens GN=UGGT1	1	4	3	28	7.49028	5.33376	24.2524	28.3115	7.22412e-10	8.8168e-08	13.223	0.977757	1	1	WT - Control	limma	7.22412e-10	8.8168e-08	TRUE	hit	7.49028
16	ATP5C1	P36542	ATP synthase subunit gamma, mitochondrial OS=Homo sapiens GN=ATP5C1 PE=1 SV=1	1	4	3	6	7.66637	4.98768	23.6741	28.1552	7.57687e-10	8.8168e-08	13.1827	0.97788	1	1	WT - Control	limma	7.57687e-10	8.8168e-08	TRUE	hit	7.66637
17	PEX3	P56589	Peroxisomal biogenesis factor 3 OS=Homo sapiens GN=PEX3 PE=1 SV=1	1	4	3	4	6.53162	5.13208	22.148	28.0661	7.7866e-10	8.8168e-08	13.1596	0.97795	1	1	WT - Control	limma	7.7866e-10	8.8168e-08	TRUE	hit	6.53162
18	GBA	P04062|P04062-2|P04062-3	Glucosylceramidase OS=Homo sapiens GN=GBA PE=1 SV=3|Isoform Short of Glucosylceramidase OS=Homo sapiens GN=GBA|Isoform 3 of Glucosylceramidase OS=Homo sapiens GN=GBA	1	4	3	20	9.75895	7.00616	27.9303	28.038	7.85399e-10	8.8168e-08	13.1523	0.977972	1	1	WT - Control	limma	7.85399e-10	8.8168e-08	TRUE	hit	9.75895
19	DNAJB12	J3KPS0|Q9NXW2	DnaJ (Hsp40) homolog, subfamily B, member 12, isoform CRA_c OS=Homo sapiens GN=DNAJB12 PE=1 SV=1|DnaJ homolog subfamily B member 12 OS=Homo sapiens GN=DNAJB12 PE=1 SV=4	1	4	3	7	6.63387	5.30672	22.54	27.7802	8.50396e-10	8.8168e-08	13.0847	0.978174	1	1	WT - Control	limma	8.50396e-10	8.8168e-08	TRUE	hit	6.63387
20	XPOT	O43592	Exportin-T OS=Homo sapiens GN=XPOT PE=1 SV=2	1	4	3	8	7.19072	6.03501	23.1705	27.764	8.54695e-10	8.8168e-08	13.0804	0.978187	1	1	WT - Control	limma	8.54695e-10	8.8168e-08	TRUE	hit	7.19072
21	FAR1	Q8WVX9	Fatty acyl-CoA reductase 1 OS=Homo sapiens GN=FAR1 PE=1 SV=1	1	4	3	8	7.20427	5.42451	22.7962	27.727	8.64553e-10	8.8168e-08	13.0706	0.978216	1	1	WT - Control	limma	8.64553e-10	8.8168e-08	TRUE	hit	7.20427
22	NUP93	H3BVG0|Q8N1F7	Nuclear pore complex protein Nup93 OS=Homo sapiens GN=NUP93 PE=1 SV=1|Nuclear pore complex protein Nup93 OS=Homo sapiens GN=NUP93 PE=1 SV=2	1	4	3	18	7.20212	4.86309	24.0003	27.5294	9.19465e-10	8.8168e-08	13.018	0.978371	1	1	WT - Control	limma	9.19465e-10	8.8168e-08	TRUE	hit	7.20212
23	CANX	P27824|P27824-2	Calnexin OS=Homo sapiens GN=CANX PE=1 SV=2|Isoform 2 of Calnexin OS=Homo sapiens GN=CANX	1	4	3	28	9.20868	7.03584	27.0933	27.3701	9.66557e-10	8.8168e-08	12.9752	0.978496	1	1	WT - Control	limma	9.66557e-10	8.8168e-08	TRUE	hit	9.20868
24	MOXD1	Q6UVY6	DBH-like monooxygenase protein 1 OS=Homo sapiens GN=MOXD1 PE=1 SV=1	1	4	3	4	6.34097	4.95207	21.7053	27.2947	9.89772e-10	8.8168e-08	12.9548	0.978556	1	1	WT - Control	limma	9.89772e-10	8.8168e-08	TRUE	hit	6.34097
25	SLC25A19	Q9HC21	Mitochondrial thiamine pyrophosphate carrier OS=Homo sapiens GN=SLC25A19 PE=1 SV=1	1	4	3	7	7.38229	5.38225	23.2502	27.0951	1.0543e-09	8.8168e-08	12.9005	0.978712	1	1	WT - Control	limma	1.0543e-09	8.8168e-08	TRUE	hit	7.38229
26	GCN1	Q92616	eIF-2-alpha kinase activator GCN1 OS=Homo sapiens GN=GCN1 PE=1 SV=6	1	4	3	47	7.43791	4.96971	25.6028	27.0417	1.07235e-09	8.8168e-08	12.8859	0.978754	1	1	WT - Control	limma	1.07235e-09	8.8168e-08	TRUE	hit	7.43791
27	KIAA0922	A2VDJ0|A2VDJ0-5|A2VDJ0-6	Transmembrane protein 131-like OS=Homo sapiens GN=KIAA0922 PE=1 SV=2|Isoform 4 of Transmembrane protein 131-like OS=Homo sapiens GN=KIAA0922|Isoform 5 of Transmembrane protein 131-like OS=Homo sapiens GN=KIAA0922	1	4	3	4	6.66727	6.01302	22.6297	26.9447	6.75924e-09	1.34236e-07	10.9933	0.978831	1	1	WT - Control	limma	6.75924e-09	1.34236e-07	TRUE	hit	6.66727
28	SLFN11	Q7Z7L1	Schlafen family member 11 OS=Homo sapiens GN=SLFN11 PE=1 SV=2	1	4	3	16	7.38274	5.26547	23.8477	26.9229	1.11376e-09	8.8168e-08	12.8531	0.978848	1	1	WT - Control	limma	1.11376e-09	8.8168e-08	TRUE	hit	7.38274
29	ESYT2	A0FGR8-6|H7BXI1	Isoform 6 of Extended synaptotagmin-2 OS=Homo sapiens GN=ESYT2|Extended synaptotagmin-2 (Fragment) OS=Homo sapiens GN=ESYT2 PE=1 SV=1	1	4	3	9	6.89549	5.09211	23.1717	26.8683	1.13337e-09	8.8168e-08	12.8381	0.978891	1	1	WT - Control	limma	1.13337e-09	8.8168e-08	TRUE	hit	6.89549
30	RPN2	P04844	Dolichyl-diphosphooligosaccharide--protein glycosyltransferase subunit 2 OS=Homo sapiens GN=RPN2 PE=1 SV=3	1	4	3	13	7.23659	5.82811	24.1142	26.6744	1.20624e-09	8.8168e-08	12.7841	0.979043	1	1	WT - Control	limma	1.20624e-09	8.8168e-08	TRUE	hit	7.23659
31	RCN2	Q14257|Q14257-2	Reticulocalbin-2 OS=Homo sapiens GN=RCN2 PE=1 SV=1|Isoform 2 of Reticulocalbin-2 OS=Homo sapiens GN=RCN2	1	4	3	13	7.53027	4.8294	24.0866	26.6325	1.22263e-09	8.8168e-08	12.7724	0.979076	1	1	WT - Control	limma	1.22263e-09	8.8168e-08	TRUE	hit	7.53027
32	P4HA1	P13674|P13674-2	Prolyl 4-hydroxylase subunit alpha-1 OS=Homo sapiens GN=P4HA1 PE=1 SV=2|Isoform 2 of Prolyl 4-hydroxylase subunit alpha-1 OS=Homo sapiens GN=P4HA1	1	4	3	18	7.71582	4.80216	24.2996	26.5249	1.26597e-09	8.8168e-08	12.7421	0.97916	1	1	WT - Control	limma	1.26597e-09	8.8168e-08	TRUE	hit	7.71582
33	RARS2	Q5T160	Probable arginine--tRNA ligase, mitochondrial OS=Homo sapiens GN=RARS2 PE=1 SV=1	1	4	3	4	6.3564	4.89414	22.0495	26.3873	1.32387e-09	8.8168e-08	12.7031	0.979268	1	1	WT - Control	limma	1.32387e-09	8.8168e-08	TRUE	hit	6.3564
34	FAM69B	A0A087WVG3|Q5VUD6|Q5VUD6-2	Protein FAM69B OS=Homo sapiens GN=FAM69B PE=1 SV=1|Protein FAM69B OS=Homo sapiens GN=FAM69B PE=1 SV=3|Isoform 2 of Protein FAM69B OS=Homo sapiens GN=FAM69B	1	4	3	4	6.60994	5.2874	21.9686	26.2001	1.40745e-09	8.8168e-08	12.6497	0.979415	1	1	WT - Control	limma	1.40745e-09	8.8168e-08	TRUE	hit	6.60994
35	IQGAP3	F2Z2E2|Q86VI3	Ras GTPase-activating-like protein IQGAP3 OS=Homo sapiens GN=IQGAP3 PE=1 SV=1|Ras GTPase-activating-like protein IQGAP3 OS=Homo sapiens GN=IQGAP3 PE=1 SV=2	1	4	3	20	6.83875	4.70755	23.9943	25.8902	1.55902e-09	8.8168e-08	12.56	0.979659	1	1	WT - Control	limma	1.55902e-09	8.8168e-08	TRUE	hit	6.83875
36	DNAJC10	Q8IXB1	DnaJ homolog subfamily C member 10 OS=Homo sapiens GN=DNAJC10 PE=1 SV=2	1	4	3	7	6.80905	4.62079	23.0598	25.7983	1.60741e-09	8.8168e-08	12.5332	0.979731	1	1	WT - Control	limma	1.60741e-09	8.8168e-08	TRUE	hit	6.80905
37	IPO9	Q96P70	Importin-9 OS=Homo sapiens GN=IPO9 PE=1 SV=3	1	4	3	6	6.58047	4.74174	22.6348	25.752	1.63242e-09	8.8168e-08	12.5196	0.979767	1	1	WT - Control	limma	1.63242e-09	8.8168e-08	TRUE	hit	6.58047
38	GBF1	Q92538|Q92538-2|Q92538-3	Golgi-specific brefeldin A-resistance guanine nucleotide exchange factor 1 OS=Homo sapiens GN=GBF1 PE=1 SV=2|Isoform 2 of Golgi-specific brefeldin A-resistance guanine nucleotide exchange factor 1 OS=Homo sapiens GN=GBF1|Isoform 3 of Golgi-specific brefeldin A-resistance guanine nucleotide exchange factor 1 OS=Homo sapiens GN=GBF1	1	4	3	15	6.59781	4.7833	23.0557	25.6558	1.68581e-09	8.8168e-08	12.4912	0.979843	1	1	WT - Control	limma	1.68581e-09	8.8168e-08	TRUE	hit	6.59781
39	SLC25A4	P12235	ADP/ATP translocase 1 OS=Homo sapiens GN=SLC25A4 PE=1 SV=4	1	4	3	3	6.47401	4.37916	21.3983	25.6227	1.70461e-09	8.8168e-08	12.4814	0.979869	1	1	WT - Control	limma	1.70461e-09	8.8168e-08	TRUE	hit	6.47401
40	IRAK1	P51617|P51617-3	Interleukin-1 receptor-associated kinase 1 OS=Homo sapiens GN=IRAK1 PE=1 SV=2|Isoform 3 of Interleukin-1 receptor-associated kinase 1 OS=Homo sapiens GN=IRAK1	1	4	3	9	7.09073	5.01331	22.7211	25.6226	1.70466e-09	8.8168e-08	12.4814	0.979869	1	1	WT - Control	limma	1.70466e-09	8.8168e-08	TRUE	hit	7.09073
41	RNGTT	O60942	mRNA-capping enzyme OS=Homo sapiens GN=RNGTT PE=1 SV=1	1	4	3	8	6.74552	4.5279	22.6715	25.6195	1.70644e-09	8.8168e-08	12.4805	0.979871	1	1	WT - Control	limma	1.70644e-09	8.8168e-08	TRUE	hit	6.74552
42	NUP210	Q8TEM1	Nuclear pore membrane glycoprotein 210 OS=Homo sapiens GN=NUP210 PE=1 SV=3	1	4	3	22	7.02616	4.57474	24.4137	25.6069	1.71366e-09	8.8168e-08	12.4767	0.979881	1	1	WT - Control	limma	1.71366e-09	8.8168e-08	TRUE	hit	7.02616
43	RHOT2	Q8IXI1	Mitochondrial Rho GTPase 2 OS=Homo sapiens GN=RHOT2 PE=1 SV=2	1	4	3	4	6.42273	4.76795	22.4217	25.5622	1.73961e-09	8.8168e-08	12.4635	0.979916	1	1	WT - Control	limma	1.73961e-09	8.8168e-08	TRUE	hit	6.42273
44	DHCR24	Q15392	Delta(24)-sterol reductase OS=Homo sapiens GN=DHCR24 PE=1 SV=2	1	4	3	4	6.987	5.44355	22.378	25.4809	1.78785e-09	8.8168e-08	12.4393	0.97998	1	1	WT - Control	limma	1.78785e-09	8.8168e-08	TRUE	hit	6.987
45	AUP1	Q9Y679|Q9Y679-2	Ancient ubiquitous protein 1 OS=Homo sapiens GN=AUP1 PE=1 SV=1|Isoform Short of Ancient ubiquitous protein 1 OS=Homo sapiens GN=AUP1	1	4	3	6	7.27954	4.78385	22.1751	25.4331	1.81696e-09	8.8168e-08	12.425	0.980018	1	1	WT - Control	limma	1.81696e-09	8.8168e-08	TRUE	hit	7.27954
46	XIAP	P98170	E3 ubiquitin-protein ligase XIAP OS=Homo sapiens GN=XIAP PE=1 SV=2	1	4	3	17	7.65746	5.91176	23.8449	25.4241	1.82248e-09	8.8168e-08	12.4223	0.980025	1	1	WT - Control	limma	1.82248e-09	8.8168e-08	TRUE	hit	7.65746
47	NDUFA10	A0A087WXC5|E7ESZ7|O95299	NADH dehydrogenase [ubiquinone] 1 alpha subcomplex subunit 10, mitochondrial OS=Homo sapiens GN=NDUFA10 PE=1 SV=1|NADH dehydrogenase [ubiquinone] 1 alpha subcomplex subunit 10, mitochondrial OS=Homo sapiens GN=NDUFA10 PE=1 SV=1|NADH dehydrogenase [ubiquinone] 1 alpha subcomplex subunit 10, mitochondrial OS=Homo sapiens GN=NDUFA10 PE=1 SV=1	1	4	3	4	6.41556	4.83478	21.6294	25.3898	1.84376e-09	8.8168e-08	12.412	0.980052	1	1	WT - Control	limma	1.84376e-09	8.8168e-08	TRUE	hit	6.41556
48	NUP205	Q92621	Nuclear pore complex protein Nup205 OS=Homo sapiens GN=NUP205 PE=1 SV=3	1	4	3	20	6.93188	4.55753	24.07	25.3766	1.85196e-09	8.8168e-08	12.4081	0.980062	1	1	WT - Control	limma	1.85196e-09	8.8168e-08	TRUE	hit	6.93188
49	MSH6	P52701	DNA mismatch repair protein Msh6 OS=Homo sapiens GN=MSH6 PE=1 SV=2	1	4	3	30	7.34225	4.90903	25.3375	25.2745	1.91725e-09	8.8168e-08	12.3774	0.980142	1	1	WT - Control	limma	1.91725e-09	8.8168e-08	TRUE	hit	7.34225
50	KDM1A	O60341	Lysine-specific histone demethylase 1A OS=Homo sapiens GN=KDM1A PE=1 SV=2	1	4	3	6	6.81922	4.33457	22.8403	25.2291	1.94711e-09	8.8168e-08	12.3637	0.980178	1	1	WT - Control	limma	1.94711e-09	8.8168e-08	TRUE	hit	6.81922
51	MMS19	Q96T76|Q96T76-8	MMS19 nucleotide excision repair protein homolog OS=Homo sapiens GN=MMS19 PE=1 SV=2|Isoform 5 of MMS19 nucleotide excision repair protein homolog OS=Homo sapiens GN=MMS19	1	4	3	7	6.96955	4.44087	23.2278	25.229	1.94717e-09	8.8168e-08	12.3636	0.980178	1	1	WT - Control	limma	1.94717e-09	8.8168e-08	TRUE	hit	6.96955
52	HSD17B12	Q53GQ0	Very-long-chain 3-oxoacyl-CoA reductase OS=Homo sapiens GN=HSD17B12 PE=1 SV=2	1	4	3	3	6.87893	4.39443	21.6784	25.1113	2.02698e-09	8.88844e-08	12.3279	0.980271	1	1	WT - Control	limma	2.02698e-09	8.88844e-08	TRUE	hit	6.87893
53	FDFT1	P37268	Squalene synthase OS=Homo sapiens GN=FDFT1 PE=1 SV=1	1	4	3	6	6.84372	5.69101	22.4673	25.0904	2.04151e-09	8.88844e-08	12.3216	0.980287	1	1	WT - Control	limma	2.04151e-09	8.88844e-08	TRUE	hit	6.84372
54	HLA	P01911|P04439|P04440|P13746|P13746-2|P30511-3|Q5SRN5|Q5SRN7|Q5Y7D6|Q6DU44|Q8MH48	HLA class II histocompatibility antigen, DRB1-15 beta chain OS=Homo sapiens GN=HLA-DRB1 PE=1 SV=2|HLA class I histocompatibility antigen, A-3 alpha chain OS=Homo sapiens GN=HLA-A PE=1 SV=2|HLA class II histocompatibility antigen, DP beta 1 chain OS=Homo sapiens GN=HLA-DPB1 PE=1 SV=1|HLA class I histocompatibility antigen, A-11 alpha chain OS=Homo sapiens GN=HLA-A PE=1 SV=1|Isoform 2 of HLA class …	1	4	3	12	6.65615	4.25769	22.7875	24.9087	2.17298e-09	9.28231e-08	12.266	0.98043	1	1	WT - Control	limma	2.17298e-09	9.28231e-08	TRUE	hit	6.65615
55	CBX2	Q14781	Chromobox protein homolog 2 OS=Homo sapiens GN=CBX2 PE=1 SV=2	1	4	3	6	6.08421	4.34361	21.6615	24.8013	2.25518e-09	9.40388e-08	12.2328	0.980514	1	1	WT - Control	limma	2.25518e-09	9.40388e-08	TRUE	hit	6.08421
56	TMEM33	D6RAA6|P57088	Transmembrane protein 33 (Fragment) OS=Homo sapiens GN=TMEM33 PE=1 SV=1|Transmembrane protein 33 OS=Homo sapiens GN=TMEM33 PE=1 SV=2	1	4	3	3	7.1603	4.5336	21.5551	24.7462	2.29866e-09	9.40388e-08	12.2157	0.980557	1	1	WT - Control	limma	2.29866e-09	9.40388e-08	TRUE	hit	7.1603
57	HK1	P19367|P19367-2|P19367-3|P19367-4	Hexokinase-1 OS=Homo sapiens GN=HK1 PE=1 SV=3|Isoform 2 of Hexokinase-1 OS=Homo sapiens GN=HK1|Isoform 3 of Hexokinase-1 OS=Homo sapiens GN=HK1|Isoform 4 of Hexokinase-1 OS=Homo sapiens GN=HK1	1	4	3	14	7.34107	4.43253	24.1261	24.708	2.32935e-09	9.40388e-08	12.2038	0.980587	1	1	WT - Control	limma	2.32935e-09	9.40388e-08	TRUE	hit	7.34107
58	IGF1R	C9J5X1|P08069	Tyrosine-protein kinase receptor OS=Homo sapiens GN=IGF1R PE=1 SV=1|Insulin-like growth factor 1 receptor OS=Homo sapiens GN=IGF1R PE=1 SV=1	1	4	3	9	6.82111	4.83924	23.1799	24.6612	2.36758e-09	9.40388e-08	12.1893	0.980624	1	1	WT - Control	limma	2.36758e-09	9.40388e-08	TRUE	hit	6.82111
59	ABCB7	A0A087WW65|O75027|O75027-2|O75027-3	ATP-binding cassette sub-family B member 7, mitochondrial OS=Homo sapiens GN=ABCB7 PE=1 SV=1|ATP-binding cassette sub-family B member 7, mitochondrial OS=Homo sapiens GN=ABCB7 PE=1 SV=2|Isoform 2 of ATP-binding cassette sub-family B member 7, mitochondrial OS=Homo sapiens GN=ABCB7|Isoform 3 of ATP-binding cassette sub-family B member 7, mitochondrial OS=Homo sapiens GN=ABCB7	1	4	3	8	6.83373	4.52884	22.7036	24.5287	2.47964e-09	9.65796e-08	12.1478	0.980728	1	1	WT - Control	limma	2.47964e-09	9.65796e-08	TRUE	hit	6.83373
60	PTDSS1	P48651|P48651-2	Phosphatidylserine synthase 1 OS=Homo sapiens GN=PTDSS1 PE=1 SV=1|Isoform 2 of Phosphatidylserine synthase 1 OS=Homo sapiens GN=PTDSS1	1	4	3	2	6.52696	5.47817	22.0251	24.5066	1.39202e-08	1.9228e-07	10.4053	0.980746	1	1	WT - Control	limma	1.39202e-08	1.9228e-07	TRUE	hit	6.52696
61	TIMMDC1	Q9NPL8	Complex I assembly factor TIMMDC1, mitochondrial OS=Homo sapiens GN=TIMMDC1 PE=1 SV=2	1	4	3	6	7.12005	5.08215	22.8552	24.4789	2.52329e-09	9.65796e-08	12.1321	0.980767	1	1	WT - Control	limma	2.52329e-09	9.65796e-08	TRUE	hit	7.12005
62	NUP133	Q8WUM0	Nuclear pore complex protein Nup133 OS=Homo sapiens GN=NUP133 PE=1 SV=2	1	4	3	12	6.82494	4.84746	22.9789	24.417	2.57869e-09	9.65796e-08	12.1126	0.980816	1	1	WT - Control	limma	2.57869e-09	9.65796e-08	TRUE	hit	6.82494
63	GLUD1	P00367	Glutamate dehydrogenase 1, mitochondrial OS=Homo sapiens GN=GLUD1 PE=1 SV=2	1	4	3	17	7.87765	5.37333	24.2766	24.3895	2.60381e-09	9.65796e-08	12.1039	0.980838	1	1	WT - Control	limma	2.60381e-09	9.65796e-08	TRUE	hit	7.87765
64	NDUFA9	Q16795	NADH dehydrogenase [ubiquinone] 1 alpha subcomplex subunit 9, mitochondrial OS=Homo sapiens GN=NDUFA9 PE=1 SV=2	1	4	3	3	6.75102	5.35335	22.5843	24.3451	2.64485e-09	9.65796e-08	12.0898	0.980873	1	1	WT - Control	limma	2.64485e-09	9.65796e-08	TRUE	hit	6.75102
65	SENP1	Q9P0U3|Q9P0U3-2	Sentrin-specific protease 1 OS=Homo sapiens GN=SENP1 PE=1 SV=2|Isoform 2 of Sentrin-specific protease 1 OS=Homo sapiens GN=SENP1	1	4	3	6	6.36029	4.65224	22.0578	24.2554	2.72994e-09	9.67719e-08	12.0613	0.980943	1	1	WT - Control	limma	2.72994e-09	9.67719e-08	TRUE	hit	6.36029
66	SMPD4	H7BXF4|Q9NXE4-2	Sphingomyelin phosphodiesterase 4 OS=Homo sapiens GN=SMPD4 PE=1 SV=1|Isoform 2 of Sphingomyelin phosphodiesterase 4 OS=Homo sapiens GN=SMPD4	1	4	3	7	6.6535	5.01691	21.8108	24.2495	2.7356e-09	9.67719e-08	12.0594	0.980948	1	1	WT - Control	limma	2.7356e-09	9.67719e-08	TRUE	hit	6.6535
67	IRS4	O14654	Insulin receptor substrate 4 OS=Homo sapiens GN=IRS4 PE=1 SV=1	1	4	3	35	8.08781	4.43512	25.3977	24.1625	2.8213e-09	9.82681e-08	12.0316	0.981016	1	1	WT - Control	limma	2.8213e-09	9.82681e-08	TRUE	hit	8.08781
68	C3ORF58	Q8NDZ4	Deleted in autism protein 1 OS=Homo sapiens GN=C3orf58 PE=1 SV=1	1	4	3	5	6.23227	4.46861	21.5872	24.0804	2.90497e-09	9.91748e-08	12.0052	0.98108	1	1	WT - Control	limma	2.90497e-09	9.91748e-08	TRUE	hit	6.23227
69	NCSTN	H0Y3Z4|Q5T205|Q92542|Q92542-2	Nicastrin (Fragment) OS=Homo sapiens GN=NCSTN PE=1 SV=7|Nicastrin (Fragment) OS=Homo sapiens GN=NCSTN PE=1 SV=1|Nicastrin OS=Homo sapiens GN=NCSTN PE=1 SV=2|Isoform 2 of Nicastrin OS=Homo sapiens GN=NCSTN	1	4	3	2	6.81065	4.85024	21.3353	24.0304	2.95721e-09	9.91748e-08	11.9891	0.98112	1	1	WT - Control	limma	2.95721e-09	9.91748e-08	TRUE	hit	6.81065
70	NTPCR	Q9BSD7	Cancer-related nucleoside-triphosphatase OS=Homo sapiens GN=NTPCR PE=1 SV=1	1	4	3	8	6.81263	4.68329	22.8661	23.9813	3.00952e-09	9.91748e-08	11.9732	0.981158	1	1	WT - Control	limma	3.00952e-09	9.91748e-08	TRUE	hit	6.81263
71	COQ5	Q5HYK3	2-methoxy-6-polyprenyl-1,4-benzoquinol methylase, mitochondrial OS=Homo sapiens GN=COQ5 PE=1 SV=2	1	4	3	4	6.51658	4.0876	22.0171	23.8883	3.11155e-09	9.91748e-08	11.943	0.981231	1	1	WT - Control	limma	3.11155e-09	9.91748e-08	TRUE	hit	6.51658
72	RCN1	Q15293	Reticulocalbin-1 OS=Homo sapiens GN=RCN1 PE=1 SV=1	1	4	3	4	6.53951	4.31702	22.0645	23.8791	3.12186e-09	9.91748e-08	11.94	0.981239	1	1	WT - Control	limma	3.12186e-09	9.91748e-08	TRUE	hit	6.53951
73	CHPF	Q8IZ52|Q8IZ52-4	Chondroitin sulfate synthase 2 OS=Homo sapiens GN=CHPF PE=1 SV=2|Isoform 3 of Chondroitin sulfate synthase 2 OS=Homo sapiens GN=CHPF	1	4	3	4	6.77041	4.81781	21.8405	23.8741	3.12742e-09	9.91748e-08	11.9384	0.981242	1	1	WT - Control	limma	3.12742e-09	9.91748e-08	TRUE	hit	6.77041
74	TUBGCP2	Q9BSJ2|Q9BSJ2-4	Gamma-tubulin complex component 2 OS=Homo sapiens GN=TUBGCP2 PE=1 SV=2|Isoform 3 of Gamma-tubulin complex component 2 OS=Homo sapiens GN=TUBGCP2	1	4	3	10	6.59675	4.45099	22.9398	23.8445	3.1609e-09	9.91748e-08	11.9287	0.981266	1	1	WT - Control	limma	3.1609e-09	9.91748e-08	TRUE	hit	6.59675
75	SFXN2	Q96NB2	Sideroflexin-2 OS=Homo sapiens GN=SFXN2 PE=1 SV=2	1	4	3	5	6.66212	5.45439	22.2469	23.8123	3.19777e-09	9.91748e-08	11.9182	0.981291	1	1	WT - Control	limma	3.19777e-09	9.91748e-08	TRUE	hit	6.66212
76	HSP90B1	P14625	Endoplasmin OS=Homo sapiens GN=HSP90B1 PE=1 SV=1	1	4	3	21	7.90678	4.1265	24.9623	23.6323	3.41281e-09	1.04282e-07	11.859	0.981432	1	1	WT - Control	limma	3.41281e-09	1.04282e-07	TRUE	hit	7.90678
77	TMEM246	Q9BRR3	Transmembrane protein 246 OS=Homo sapiens GN=TMEM246 PE=1 SV=1	1	4	3	4	6.62367	4.71597	22.1306	23.5768	3.48231e-09	1.04282e-07	11.8407	0.981476	1	1	WT - Control	limma	3.48231e-09	1.04282e-07	TRUE	hit	6.62367
78	SAMHD1	Q9Y3Z3	Deoxynucleoside triphosphate triphosphohydrolase SAMHD1 OS=Homo sapiens GN=SAMHD1 PE=1 SV=2	1	4	3	10	7.07178	4.65801	23.0676	23.5624	3.50062e-09	1.04282e-07	11.8359	0.981487	1	1	WT - Control	limma	3.50062e-09	1.04282e-07	TRUE	hit	7.07178
79	PIK3R1	P27986|P27986-4	Phosphatidylinositol 3-kinase regulatory subunit alpha OS=Homo sapiens GN=PIK3R1 PE=1 SV=2|Isoform 4 of Phosphatidylinositol 3-kinase regulatory subunit alpha OS=Homo sapiens GN=PIK3R1	1	4	3	7	6.4057	4.7694	22.4483	23.4819	3.60483e-09	1.05991e-07	11.8092	0.981551	1	1	WT - Control	limma	3.60483e-09	1.05991e-07	TRUE	hit	6.4057
80	MTOR	P42345	Serine/threonine-protein kinase mTOR OS=Homo sapiens GN=MTOR PE=1 SV=1	1	4	3	18	6.56135	4.6408	23.3922	23.4129	3.69692e-09	1.06591e-07	11.7861	0.981605	1	1	WT - Control	limma	3.69692e-09	1.06591e-07	TRUE	hit	6.56135
81	WAPL	Q7Z5K2|Q7Z5K2-2|Q7Z5K2-3	Wings apart-like protein homolog OS=Homo sapiens GN=WAPL PE=1 SV=1|Isoform 2 of Wings apart-like protein homolog OS=Homo sapiens GN=WAPL|Isoform 3 of Wings apart-like protein homolog OS=Homo sapiens GN=WAPL	1	4	3	8	6.07926	4.04136	22.3779	23.3964	3.71937e-09	1.06591e-07	11.7806	0.981618	1	1	WT - Control	limma	3.71937e-09	1.06591e-07	TRUE	hit	6.07926
82	FOXRED2	Q8IWF2	FAD-dependent oxidoreductase domain-containing protein 2 OS=Homo sapiens GN=FOXRED2 PE=1 SV=1	1	4	3	4	6.08997	4.31562	21.4868	23.3545	3.77698e-09	1.06888e-07	11.7666	0.981651	1	1	WT - Control	limma	3.77698e-09	1.06888e-07	TRUE	hit	6.08997
83	SLC1A5	Q15758	Neutral amino acid transporter B(0) OS=Homo sapiens GN=SLC1A5 PE=1 SV=2	1	4	3	6	7.40103	6.1885	23.2198	23.3	3.85342e-09	1.07705e-07	11.7482	0.981693	1	1	WT - Control	limma	3.85342e-09	1.07705e-07	TRUE	hit	7.40103
84	RPL38	P63173	60S ribosomal protein L38 OS=Homo sapiens GN=RPL38 PE=1 SV=2	1	4	3	5	7.14229	4.53823	22.4614	23.2647	3.90375e-09	1.07781e-07	11.7364	0.981721	1	1	WT - Control	limma	3.90375e-09	1.07781e-07	TRUE	hit	7.14229
85	APBB1	A0A075B7G8|A0A087WYH9|A0A087X0V7|J3KPL8|O00213|O00213-2|O00213-3|O00213-4|O00213-5|O00213-6	Amyloid beta A4 precursor protein-binding family B member 1 OS=Homo sapiens GN=APBB1 PE=1 SV=6|Amyloid beta A4 precursor protein-binding family B member 1 OS=Homo sapiens GN=APBB1 PE=1 SV=1|Amyloid beta A4 precursor protein-binding family B member 1 OS=Homo sapiens GN=APBB1 PE=1 SV=1|Amyloid beta A4 precursor protein-binding family B member 1 OS=Homo sapiens GN=APBB1 PE=1 SV=1|Amyloid beta A4 pre…	1	4	3	3	6.05106	4.59256	21.7496	23.1753	4.03475e-09	1.10056e-07	11.7061	0.981791	1	1	WT - Control	limma	4.03475e-09	1.10056e-07	TRUE	hit	6.05106
86	PNPLA6	Q8IY17|Q8IY17-2|Q8IY17-3|Q8IY17-4	Neuropathy target esterase OS=Homo sapiens GN=PNPLA6 PE=1 SV=2|Isoform 2 of Neuropathy target esterase OS=Homo sapiens GN=PNPLA6|Isoform 3 of Neuropathy target esterase OS=Homo sapiens GN=PNPLA6|Isoform 4 of Neuropathy target esterase OS=Homo sapiens GN=PNPLA6	1	4	3	5	6.33203	4.40958	21.8476	23.0474	4.2307e-09	1.13473e-07	11.6626	0.981892	1	1	WT - Control	limma	4.2307e-09	1.13473e-07	TRUE	hit	6.33203
87	NOMO3|NOMO2	J3KN36|P69849|Q5JPE7|Q5JPE7-2	Nodal modulator 3 OS=Homo sapiens GN=NOMO3 PE=1 SV=1|Nodal modulator 3 OS=Homo sapiens GN=NOMO3 PE=3 SV=2|Nodal modulator 2 OS=Homo sapiens GN=NOMO2 PE=1 SV=1|Isoform 2 of Nodal modulator 2 OS=Homo sapiens GN=NOMO2	1	4	3	10	6.81622	4.49713	22.4491	23.0178	4.27767e-09	1.13473e-07	11.6525	0.981915	1	1	WT - Control	limma	4.27767e-09	1.13473e-07	TRUE	hit	6.81622
88	RPAP1	Q9BWH6	RNA polymerase II-associated protein 1 OS=Homo sapiens GN=RPAP1 PE=1 SV=3	1	4	3	9	6.66906	4.98971	22.8824	22.9733	4.34906e-09	1.13473e-07	11.6373	0.98195	1	1	WT - Control	limma	4.34906e-09	1.13473e-07	TRUE	hit	6.66906
89	TTC27	Q6P3X3	Tetratricopeptide repeat protein 27 OS=Homo sapiens GN=TTC27 PE=1 SV=1	1	4	3	9	6.83857	4.43401	23.0115	22.9663	4.36048e-09	1.13473e-07	11.6349	0.981956	1	1	WT - Control	limma	4.36048e-09	1.13473e-07	TRUE	hit	6.83857
90	RNF213	A0A0A0MTC1|A0A0A0MTR7|Q63HN8|Q63HN8-4	E3 ubiquitin-protein ligase RNF213 OS=Homo sapiens GN=RNF213 PE=1 SV=1|E3 ubiquitin-protein ligase RNF213 OS=Homo sapiens GN=RNF213 PE=1 SV=1|E3 ubiquitin-protein ligase RNF213 OS=Homo sapiens GN=RNF213 PE=1 SV=3|Isoform 2 of E3 ubiquitin-protein ligase RNF213 OS=Homo sapiens GN=RNF213	1	4	3	27	6.67526	4.23328	23.7641	22.9353	4.41121e-09	1.13488e-07	11.6242	0.98198	1	1	WT - Control	limma	4.41121e-09	1.13488e-07	TRUE	hit	6.67526
91	FARSA	Q9Y285|Q9Y285-2	Phenylalanine--tRNA ligase alpha subunit OS=Homo sapiens GN=FARSA PE=1 SV=3|Isoform 2 of Phenylalanine--tRNA ligase alpha subunit OS=Homo sapiens GN=FARSA	1	4	3	13	7.42205	5.77704	23.9338	22.841	4.56976e-09	1.14366e-07	11.5917	0.982054	1	1	WT - Control	limma	4.56976e-09	1.14366e-07	TRUE	hit	7.42205
92	TMEM263	Q8WUH6	Transmembrane protein 263 OS=Homo sapiens GN=TMEM263 PE=1 SV=1	1	4	3	4	6.59572	4.44318	21.364	22.826	4.59549e-09	1.14366e-07	11.5866	0.982066	1	1	WT - Control	limma	4.59549e-09	1.14366e-07	TRUE	hit	6.59572
93	SLC25A22	E9PJH7|Q9H936	Mitochondrial glutamate carrier 1 (Fragment) OS=Homo sapiens GN=SLC25A22 PE=1 SV=5|Mitochondrial glutamate carrier 1 OS=Homo sapiens GN=SLC25A22 PE=1 SV=1	1	4	3	7	7.1605	4.72795	22.2814	22.8252	4.59686e-09	1.14366e-07	11.5863	0.982066	1	1	WT - Control	limma	4.59686e-09	1.14366e-07	TRUE	hit	7.1605
94	EPHX4	Q8IUS5	Epoxide hydrolase 4 OS=Homo sapiens GN=EPHX4 PE=2 SV=2	1	4	3	3	6.7955	4.42616	21.5055	22.7775	4.68006e-09	1.1517e-07	11.5698	0.982104	1	1	WT - Control	limma	4.68006e-09	1.1517e-07	TRUE	hit	6.7955
95	ISYNA1	Q9NPH2|Q9NPH2-2|Q9NPH2-3	Inositol-3-phosphate synthase 1 OS=Homo sapiens GN=ISYNA1 PE=1 SV=1|Isoform 2 of Inositol-3-phosphate synthase 1 OS=Homo sapiens GN=ISYNA1|Isoform 3 of Inositol-3-phosphate synthase 1 OS=Homo sapiens GN=ISYNA1	1	4	3	7	6.75206	4.43801	23.033	22.7202	4.78212e-09	1.16416e-07	11.5499	0.982149	1	1	WT - Control	limma	4.78212e-09	1.16416e-07	TRUE	hit	6.75206
96	RPS16	P62249	40S ribosomal protein S16 OS=Homo sapiens GN=RPS16 PE=1 SV=2	1	4	3	12	8.20646	4.11075	24.5995	22.5933	5.01709e-09	1.20837e-07	11.5056	0.982249	1	1	WT - Control	limma	5.01709e-09	1.20837e-07	TRUE	hit	8.20646
97	PRKDC	P78527	DNA-dependent protein kinase catalytic subunit OS=Homo sapiens GN=PRKDC PE=1 SV=3	1	4	3	71	7.51532	4.47359	25.922	22.5365	5.12648e-09	1.21591e-07	11.4856	0.982293	1	1	WT - Control	limma	5.12648e-09	1.21591e-07	TRUE	hit	7.51532
98	TM9SF1|E9PSI1	E9PMQ9|E9PSI1|O15321|O15321-2	Transmembrane 9 superfamily member OS=Homo sapiens GN=TM9SF1 PE=3 SV=1|Transmembrane 9 superfamily member OS=Homo sapiens PE=3 SV=1|Transmembrane 9 superfamily member 1 OS=Homo sapiens GN=TM9SF1 PE=2 SV=2|Isoform 2 of Transmembrane 9 superfamily member 1 OS=Homo sapiens GN=TM9SF1	1	4	3	5	7.00667	5.03431	21.9286	22.5215	5.15582e-09	1.21591e-07	11.4804	0.982305	1	1	WT - Control	limma	5.15582e-09	1.21591e-07	TRUE	hit	7.00667
99	SLC25A6	P12236	ADP/ATP translocase 3 OS=Homo sapiens GN=SLC25A6 PE=1 SV=4	1	4	3	4	6.15267	4.61211	21.376	22.3837	5.43392e-09	1.26829e-07	11.4317	0.982413	1	1	WT - Control	limma	5.43392e-09	1.26829e-07	TRUE	hit	6.15267
100	PIK3R3	F6TDL0|Q92569	Phosphatidylinositol 3-kinase regulatory subunit gamma OS=Homo sapiens GN=PIK3R3 PE=1 SV=1|Phosphatidylinositol 3-kinase regulatory subunit gamma OS=Homo sapiens GN=PIK3R3 PE=1 SV=2	1	4	3	3	5.96116	3.91269	21.3457	22.3523	5.49974e-09	1.27055e-07	11.4205	0.982438	1	1	WT - Control	limma	5.49974e-09	1.27055e-07	TRUE	hit	5.96116
101	PPT1	E9PMG2|P50897	Palmitoyl-protein thioesterase 1 (Fragment) OS=Homo sapiens GN=PPT1 PE=1 SV=1|Palmitoyl-protein thioesterase 1 OS=Homo sapiens GN=PPT1 PE=1 SV=1	1	4	3	4	6.7269	5.28306	22.1971	22.3153	5.57815e-09	1.2746e-07	11.4074	0.982467	1	1	WT - Control	limma	5.57815e-09	1.2746e-07	TRUE	hit	6.7269
102	TRMT44	Q8IYL2	Probable tRNA (uracil-O(2)-)-methyltransferase OS=Homo sapiens GN=TRMT44 PE=1 SV=2	1	4	3	4	6.41319	4.42916	21.34	22.2405	5.741e-09	1.2746e-07	11.3807	0.982526	1	1	WT - Control	limma	5.741e-09	1.2746e-07	TRUE	hit	6.41319
103	ZMYM1	Q5SVZ6	Zinc finger MYM-type protein 1 OS=Homo sapiens GN=ZMYM1 PE=1 SV=1	1	4	3	3	5.9901	3.9645	21.1605	22.2358	5.75124e-09	1.2746e-07	11.379	0.982529	1	1	WT - Control	limma	5.75124e-09	1.2746e-07	TRUE	hit	5.9901
104	TRAF2	Q12933|Q12933-2|Q12933-3	TNF receptor-associated factor 2 OS=Homo sapiens GN=TRAF2 PE=1 SV=2|Isoform 2 of TNF receptor-associated factor 2 OS=Homo sapiens GN=TRAF2|Isoform 3 of TNF receptor-associated factor 2 OS=Homo sapiens GN=TRAF2	1	4	3	7	6.78142	4.79313	22.9865	22.2186	5.7896e-09	1.2746e-07	11.3728	0.982543	1	1	WT - Control	limma	5.7896e-09	1.2746e-07	TRUE	hit	6.78142
105	FANCD2	Q9BXW9|Q9BXW9-1	Fanconi anemia group D2 protein OS=Homo sapiens GN=FANCD2 PE=1 SV=2|Isoform 1 of Fanconi anemia group D2 protein OS=Homo sapiens GN=FANCD2	1	4	3	15	7.12119	4.93783	23.4881	22.2143	5.79906e-09	1.2746e-07	11.3713	0.982546	1	1	WT - Control	limma	5.79906e-09	1.2746e-07	TRUE	hit	7.12119
106	CDKAL1	Q5VV42|Q5VV42-2	Threonylcarbamoyladenosine tRNA methylthiotransferase OS=Homo sapiens GN=CDKAL1 PE=1 SV=1|Isoform 2 of Threonylcarbamoyladenosine tRNA methylthiotransferase OS=Homo sapiens GN=CDKAL1	1	4	3	8	6.66734	4.74406	22.2077	22.188	5.85827e-09	1.2746e-07	11.3619	0.982567	1	1	WT - Control	limma	5.85827e-09	1.2746e-07	TRUE	hit	6.66734
107	ATP2A2	P16615	Sarcoplasmic/endoplasmic reticulum calcium ATPase 2 OS=Homo sapiens GN=ATP2A2 PE=1 SV=1	1	4	3	29	7.59066	4.78264	25.1754	22.1646	5.91134e-09	1.2746e-07	11.3535	0.982585	1	1	WT - Control	limma	5.91134e-09	1.2746e-07	TRUE	hit	7.59066
108	SLC25A11	I3L1P8|Q02978	Mitochondrial 2-oxoglutarate/malate carrier protein (Fragment) OS=Homo sapiens GN=SLC25A11 PE=1 SV=1|Mitochondrial 2-oxoglutarate/malate carrier protein OS=Homo sapiens GN=SLC25A11 PE=1 SV=3	1	4	3	4	6.95298	4.03097	21.305	22.1268	5.9984e-09	1.27511e-07	11.3399	0.982615	1	1	WT - Control	limma	5.9984e-09	1.27511e-07	TRUE	hit	6.95298
109	FANCI	Q9NVI1	Fanconi anemia group I protein OS=Homo sapiens GN=FANCI PE=1 SV=4	1	4	3	22	7.31336	5.03741	24.1899	22.1148	6.02637e-09	1.27511e-07	11.3356	0.982625	1	1	WT - Control	limma	6.02637e-09	1.27511e-07	TRUE	hit	7.31336
110	SLC25A21	Q9BQT8|Q9BQT8-2	Mitochondrial 2-oxodicarboxylate carrier OS=Homo sapiens GN=SLC25A21 PE=1 SV=1|Isoform 2 of Mitochondrial 2-oxodicarboxylate carrier OS=Homo sapiens GN=SLC25A21	1	4	3	5	6.67971	4.63327	21.7139	21.9436	6.44069e-09	1.33966e-07	11.2736	0.982759	1	1	WT - Control	limma	6.44069e-09	1.33966e-07	TRUE	hit	6.67971
111	KIAA0368|ECM29	J3KN16|Q5VYK3	Proteasome-associated protein ECM29 homolog OS=Homo sapiens GN=KIAA0368 PE=1 SV=1|Proteasome-associated protein ECM29 homolog OS=Homo sapiens GN=ECM29 PE=1 SV=2	1	4	3	9	6.47168	4.39966	22.7552	21.94	6.44976e-09	1.33966e-07	11.2723	0.982762	1	1	WT - Control	limma	6.44976e-09	1.33966e-07	TRUE	hit	6.47168
112	P4HB	H7BZ94|P07237	Protein disulfide-isomerase OS=Homo sapiens GN=P4HB PE=1 SV=2|Protein disulfide-isomerase OS=Homo sapiens GN=P4HB PE=1 SV=3	1	4	3	13	7.0058	4.99544	23.7316	21.8616	6.65032e-09	1.34236e-07	11.2437	0.982823	1	1	WT - Control	limma	6.65032e-09	1.34236e-07	TRUE	hit	7.0058
113	HACD3	H3BPZ1|H3BS72|Q9P035	Very-long-chain (3R)-3-hydroxyacyl-CoA dehydratase 3 OS=Homo sapiens GN=HACD3 PE=1 SV=1|Very-long-chain (3R)-3-hydroxyacyl-CoA dehydratase 3 OS=Homo sapiens GN=HACD3 PE=1 SV=1|Very-long-chain (3R)-3-hydroxyacyl-CoA dehydratase 3 OS=Homo sapiens GN=HACD3 PE=1 SV=2	1	4	3	3	7.07796	4.28219	21.6686	21.8565	6.66379e-09	1.34236e-07	11.2418	0.982827	1	1	WT - Control	limma	6.66379e-09	1.34236e-07	TRUE	hit	7.07796
114	NYNRIN	Q9P2P1	Protein NYNRIN OS=Homo sapiens GN=NYNRIN PE=2 SV=3	1	4	3	8	5.87214	3.88383	21.6047	21.8283	6.73774e-09	1.34236e-07	11.2315	0.98285	1	1	WT - Control	limma	6.73774e-09	1.34236e-07	TRUE	hit	5.87214
115	PDIA3	H7BZJ3|P30101	Protein disulfide-isomerase A3 (Fragment) OS=Homo sapiens GN=PDIA3 PE=1 SV=1|Protein disulfide-isomerase A3 OS=Homo sapiens GN=PDIA3 PE=1 SV=4	1	4	3	13	6.97138	3.84073	23.3948	21.8225	6.75313e-09	1.34236e-07	11.2294	0.982854	1	1	WT - Control	limma	6.75313e-09	1.34236e-07	TRUE	hit	6.97138
116	ADAMTS1	Q9UHI8	A disintegrin and metalloproteinase with thrombospondin motifs 1 OS=Homo sapiens GN=ADAMTS1 PE=1 SV=4	1	4	3	7	6.53934	4.81717	22.5954	21.7768	6.8753e-09	1.35354e-07	11.2126	0.98289	1	1	WT - Control	limma	6.8753e-09	1.35354e-07	TRUE	hit	6.53934
117	TCERG1	O14776	Transcription elongation regulator 1 OS=Homo sapiens GN=TCERG1 PE=1 SV=2	1	4	3	15	6.82218	4.11466	23.3369	21.723	7.02218e-09	1.37054e-07	11.1928	0.982932	1	1	WT - Control	limma	7.02218e-09	1.37054e-07	TRUE	hit	6.82218
118	PCNA	P12004	Proliferating cell nuclear antigen OS=Homo sapiens GN=PCNA PE=1 SV=1	1	4	3	7	7.09781	3.685	23.413	21.6632	7.18965e-09	1.39123e-07	11.1708	0.982979	1	1	WT - Control	limma	7.18965e-09	1.39123e-07	TRUE	hit	7.09781
119	EARS2	H3BTB7|Q5JPH6|Q5JPH6-2	Probable glutamate--tRNA ligase, mitochondrial OS=Homo sapiens GN=EARS2 PE=1 SV=1|Probable glutamate--tRNA ligase, mitochondrial OS=Homo sapiens GN=EARS2 PE=1 SV=2|Isoform 2 of Probable glutamate--tRNA ligase, mitochondrial OS=Homo sapiens GN=EARS2	1	4	3	7	6.38278	3.89996	22.1212	21.5924	7.39394e-09	1.41863e-07	11.1445	0.983035	1	1	WT - Control	limma	7.39394e-09	1.41863e-07	TRUE	hit	6.38278
120	HEATR1	Q9H583	HEAT repeat-containing protein 1 OS=Homo sapiens GN=HEATR1 PE=1 SV=3	1	4	3	8	6.64265	4.67003	22.8132	21.5512	7.51568e-09	1.42631e-07	11.1292	0.983067	1	1	WT - Control	limma	7.51568e-09	1.42631e-07	TRUE	hit	6.64265
121	SLC35F6	Q8N357	Solute carrier family 35 member F6 OS=Homo sapiens GN=SLC35F6 PE=1 SV=1	1	4	3	2	6.45774	4.36231	21.086	21.517	7.61831e-09	1.42631e-07	11.1164	0.983094	1	1	WT - Control	limma	7.61831e-09	1.42631e-07	TRUE	hit	6.45774
122	GNL3L	Q9NVN8	Guanine nucleotide-binding protein-like 3-like protein OS=Homo sapiens GN=GNL3L PE=1 SV=1	1	4	3	7	6.53923	3.95655	22.918	21.5155	7.62292e-09	1.42631e-07	11.1159	0.983095	1	1	WT - Control	limma	7.62292e-09	1.42631e-07	TRUE	hit	6.53923
123	QPCTL	Q9NXS2	Glutaminyl-peptide cyclotransferase-like protein OS=Homo sapiens GN=QPCTL PE=1 SV=2	1	4	3	2	6.81111	3.71131	20.9837	21.4227	7.90989e-09	1.44269e-07	11.0812	0.983168	1	1	WT - Control	limma	7.90989e-09	1.44269e-07	TRUE	hit	6.81111
124	CRTAC1	A0A0C4DFP6|Q9NQ79|Q9NQ79-2|Q9NQ79-3	Cartilage acidic protein 1 OS=Homo sapiens GN=CRTAC1 PE=1 SV=1|Cartilage acidic protein 1 OS=Homo sapiens GN=CRTAC1 PE=1 SV=2|Isoform 2 of Cartilage acidic protein 1 OS=Homo sapiens GN=CRTAC1|Isoform 3 of Cartilage acidic protein 1 OS=Homo sapiens GN=CRTAC1	1	4	3	4	6.64895	4.36279	21.6066	21.4215	7.91377e-09	1.44269e-07	11.0807	0.983169	1	1	WT - Control	limma	7.91377e-09	1.44269e-07	TRUE	hit	6.64895
125	DCP1B	Q8IZD4	mRNA-decapping enzyme 1B OS=Homo sapiens GN=DCP1B PE=1 SV=2	1	4	3	5	5.91707	3.70891	20.6117	21.3784	8.05119e-09	1.44269e-07	11.0645	0.983203	1	1	WT - Control	limma	8.05119e-09	1.44269e-07	TRUE	hit	5.91707
126	ATP6V1H	Q9UI12	V-type proton ATPase subunit H OS=Homo sapiens GN=ATP6V1H PE=1 SV=1	1	4	3	4	6.34635	4.18119	22.16	21.378	8.05261e-09	1.44269e-07	11.0644	0.983203	1	1	WT - Control	limma	8.05261e-09	1.44269e-07	TRUE	hit	6.34635
127	RPS3	P23396	40S ribosomal protein S3 OS=Homo sapiens GN=RPS3 PE=1 SV=2	1	4	3	13	8.12422	4.21955	24.8011	21.371	8.07522e-09	1.44269e-07	11.0617	0.983209	1	1	WT - Control	limma	8.07522e-09	1.44269e-07	TRUE	hit	8.12422
128	RPS27A	P62979	Ubiquitin-40S ribosomal protein S27a OS=Homo sapiens GN=RPS27A PE=1 SV=2	1	4	3	7	7.92949	4.81723	23.966	21.3655	8.09284e-09	1.44269e-07	11.0597	0.983213	1	1	WT - Control	limma	8.09284e-09	1.44269e-07	TRUE	hit	7.92949
129	ERLEC1	Q96DZ1	Endoplasmic reticulum lectin 1 OS=Homo sapiens GN=ERLEC1 PE=1 SV=1	1	4	3	14	7.52155	4.90033	23.9212	21.3441	8.16248e-09	1.44374e-07	11.0516	0.98323	1	1	WT - Control	limma	8.16248e-09	1.44374e-07	TRUE	hit	7.52155
130	NMT2	O60551|Q5VUC6	Glycylpeptide N-tetradecanoyltransferase 2 OS=Homo sapiens GN=NMT2 PE=1 SV=1|Glycylpeptide N-tetradecanoyltransferase OS=Homo sapiens GN=NMT2 PE=1 SV=1	1	4	3	2	6.20664	4.4401	21.7791	21.2481	4.11427e-08	3.29141e-07	9.46929	0.983305	1	1	WT - Control	limma	4.11427e-08	3.29141e-07	TRUE	hit	6.20664
131	NOM1	Q5C9Z4	Nucleolar MIF4G domain-containing protein 1 OS=Homo sapiens GN=NOM1 PE=1 SV=1	1	4	3	9	6.46587	4.39287	23.0785	21.1292	8.89998e-09	1.56198e-07	10.9701	0.983399	1	1	WT - Control	limma	8.89998e-09	1.56198e-07	TRUE	hit	6.46587
132	ZNF664	Q8N3J9	Zinc finger protein 664 OS=Homo sapiens GN=ZNF664 PE=2 SV=1	1	4	3	3	5.94414	4.58795	21.9114	21.0886	4.35607e-08	3.37534e-07	9.41831	0.983431	1	1	WT - Control	limma	4.35607e-08	3.37534e-07	TRUE	hit	5.94414
133	VWA8	A3KMH1|A3KMH1-3	von Willebrand factor A domain-containing protein 8 OS=Homo sapiens GN=VWA8 PE=1 SV=2|Isoform 3 of von Willebrand factor A domain-containing protein 8 OS=Homo sapiens GN=VWA8	1	4	3	11	6.46959	3.77443	22.4899	21.0496	9.19163e-09	1.60076e-07	10.9396	0.983461	1	1	WT - Control	limma	9.19163e-09	1.60076e-07	TRUE	hit	6.46959
134	IFT140	Q96RY7	Intraflagellar transport protein 140 homolog OS=Homo sapiens GN=IFT140 PE=1 SV=1	1	4	3	6	6.21627	3.86718	22.0822	20.9542	9.55563e-09	1.64128e-07	10.9029	0.983536	1	1	WT - Control	limma	9.55563e-09	1.64128e-07	TRUE	hit	6.21627
135	ABCB6	H7BXK9|Q9NP58|Q9NP58-4	ATP-binding cassette sub-family B member 6, mitochondrial (Fragment) OS=Homo sapiens GN=ABCB6 PE=1 SV=1|ATP-binding cassette sub-family B member 6, mitochondrial OS=Homo sapiens GN=ABCB6 PE=1 SV=1|Isoform 2 of ATP-binding cassette sub-family B member 6, mitochondrial OS=Homo sapiens GN=ABCB6	1	4	3	6	6.35515	4.74501	21.4035	20.9087	9.73449e-09	1.64128e-07	10.8854	0.983572	1	1	WT - Control	limma	9.73449e-09	1.64128e-07	TRUE	hit	6.35515
136	GANAB	Q14697-2	Isoform 2 of Neutral alpha-glucosidase AB OS=Homo sapiens GN=GANAB	1	4	3	18	7.63723	3.98385	24.2364	20.9038	9.75396e-09	1.64128e-07	10.8835	0.983576	1	1	WT - Control	limma	9.75396e-09	1.64128e-07	TRUE	hit	7.63723
137	HOOK3	Q86VS8	Protein Hook homolog 3 OS=Homo sapiens GN=HOOK3 PE=1 SV=2	1	4	3	7	6.0199	3.64806	21.8	20.8948	9.78991e-09	1.64128e-07	10.88	0.983583	1	1	WT - Control	limma	9.78991e-09	1.64128e-07	TRUE	hit	6.0199
138	PANK4	Q9NVE7	Pantothenate kinase 4 OS=Homo sapiens GN=PANK4 PE=1 SV=1	1	4	3	6	6.63693	4.08962	22.1489	20.8828	9.838e-09	1.64128e-07	10.8753	0.983592	1	1	WT - Control	limma	9.838e-09	1.64128e-07	TRUE	hit	6.63693
139	APOB	A0A087WTM7|P04114	Apolipoprotein B-100 OS=Homo sapiens GN=APOB PE=1 SV=1|Apolipoprotein B-100 OS=Homo sapiens GN=APOB PE=1 SV=2	1	4	3	3	6.08525	5.28563	21.7572	20.8828	4.69218e-08	3.5217e-07	9.35173	0.983592	1	1	WT - Control	limma	4.69218e-08	3.5217e-07	TRUE	hit	6.08525
140	PSMC2	P35998	26S protease regulatory subunit 7 OS=Homo sapiens GN=PSMC2 PE=1 SV=3	1	4	3	12	7.42672	4.45518	23.6245	20.8776	9.85927e-09	1.64128e-07	10.8733	0.983596	1	1	WT - Control	limma	9.85927e-09	1.64128e-07	TRUE	hit	7.42672
141	HAX1	O00165|O00165-2|O00165-5	HCLS1-associated protein X-1 OS=Homo sapiens GN=HAX1 PE=1 SV=2|Isoform 2 of HCLS1-associated protein X-1 OS=Homo sapiens GN=HAX1|Isoform 5 of HCLS1-associated protein X-1 OS=Homo sapiens GN=HAX1	1	4	3	5	6.81727	3.96801	21.9502	20.8365	1.00265e-08	1.64674e-07	10.8574	0.983629	1	1	WT - Control	limma	1.00265e-08	1.64674e-07	TRUE	hit	6.81727
142	ARMCX2	Q7L311	Armadillo repeat-containing X-linked protein 2 OS=Homo sapiens GN=ARMCX2 PE=2 SV=1	1	4	3	4	6.48057	3.82033	22.0003	20.8338	1.00375e-08	1.64674e-07	10.8563	0.983631	1	1	WT - Control	limma	1.00375e-08	1.64674e-07	TRUE	hit	6.48057
143	LGALS3BP	Q08380	Galectin-3-binding protein OS=Homo sapiens GN=LGALS3BP PE=1 SV=1	1	4	3	9	7.16968	4.55776	23.5946	20.7787	1.02673e-08	1.64891e-07	10.8349	0.983674	1	1	WT - Control	limma	1.02673e-08	1.64891e-07	TRUE	hit	7.16968
144	TTC26	A0AVF1|A0AVF1-3	Intraflagellar transport protein 56 OS=Homo sapiens GN=TTC26 PE=2 SV=1|Isoform 3 of Intraflagellar transport protein 56 OS=Homo sapiens GN=TTC26	1	4	3	5	6.25112	3.81235	21.4492	20.7722	1.02947e-08	1.64891e-07	10.8323	0.983679	1	1	WT - Control	limma	1.02947e-08	1.64891e-07	TRUE	hit	6.25112
145	GLT8D1	Q68CQ7	Glycosyltransferase 8 domain-containing protein 1 OS=Homo sapiens GN=GLT8D1 PE=1 SV=2	1	4	3	5	6.7504	3.78951	23.2744	20.7647	1.03267e-08	1.64891e-07	10.8294	0.983685	1	1	WT - Control	limma	1.03267e-08	1.64891e-07	TRUE	hit	6.7504
146	SLC25A13	Q9UJS0|Q9UJS0-2	Calcium-binding mitochondrial carrier protein Aralar2 OS=Homo sapiens GN=SLC25A13 PE=1 SV=2|Isoform 2 of Calcium-binding mitochondrial carrier protein Aralar2 OS=Homo sapiens GN=SLC25A13	1	4	3	7	7.59302	5.0085	23.2754	20.761	1.03421e-08	1.64891e-07	10.828	0.983688	1	1	WT - Control	limma	1.03421e-08	1.64891e-07	TRUE	hit	7.59302
147	IARS2	Q9NSE4	Isoleucine--tRNA ligase, mitochondrial OS=Homo sapiens GN=IARS2 PE=1 SV=2	1	4	3	7	6.61847	3.76487	22.719	20.7387	1.04378e-08	1.65253e-07	10.8192	0.983706	1	1	WT - Control	limma	1.04378e-08	1.65253e-07	TRUE	hit	6.61847
148	DLD	E9PEX6|P09622|P09622-2	Dihydrolipoyl dehydrogenase OS=Homo sapiens GN=DLD PE=1 SV=1|Dihydrolipoyl dehydrogenase, mitochondrial OS=Homo sapiens GN=DLD PE=1 SV=2|Isoform 2 of Dihydrolipoyl dehydrogenase, mitochondrial OS=Homo sapiens GN=DLD	1	4	3	6	6.75624	4.30561	23.6672	20.7154	1.05384e-08	1.65687e-07	10.8101	0.983724	1	1	WT - Control	limma	1.05384e-08	1.65687e-07	TRUE	hit	6.75624
149	ARHGEF40	Q8TER5|Q8TER5-2|Q8TER5-3|Q8TER5-4	Rho guanine nucleotide exchange factor 40 OS=Homo sapiens GN=ARHGEF40 PE=1 SV=3|Isoform 2 of Rho guanine nucleotide exchange factor 40 OS=Homo sapiens GN=ARHGEF40|Isoform 3 of Rho guanine nucleotide exchange factor 40 OS=Homo sapiens GN=ARHGEF40|Isoform 4 of Rho guanine nucleotide exchange factor 40 OS=Homo sapiens GN=ARHGEF40	1	4	3	5	6.21827	3.65122	20.9387	20.5568	1.12533e-08	1.75707e-07	10.7478	0.983849	1	1	WT - Control	limma	1.12533e-08	1.75707e-07	TRUE	hit	6.21827
150	ZNF768	H3BS42|Q9H5H4	Zinc finger protein 768 OS=Homo sapiens GN=ZNF768 PE=1 SV=2|Zinc finger protein 768 OS=Homo sapiens GN=ZNF768 PE=1 SV=2	1	4	3	6	6.72643	3.85464	22.7368	20.4958	1.15423e-08	1.77444e-07	10.7236	0.983896	1	1	WT - Control	limma	1.15423e-08	1.77444e-07	TRUE	hit	6.72643
151	CXORF57	Q6NSI4	Uncharacterized protein CXorf57 OS=Homo sapiens GN=CXorf57 PE=1 SV=2	1	4	3	6	6.16824	4.48026	21.6508	20.4633	1.16999e-08	1.77444e-07	10.7107	0.983922	1	1	WT - Control	limma	1.16999e-08	1.77444e-07	TRUE	hit	6.16824
152	ADGRL2	B1ALU1|B1ALU3|O95490|O95490-2|O95490-5|O95490-6|O95490-7	Adhesion G protein-coupled receptor L2 OS=Homo sapiens GN=ADGRL2 PE=1 SV=1|Adhesion G protein-coupled receptor L2 OS=Homo sapiens GN=ADGRL2 PE=1 SV=1|Adhesion G protein-coupled receptor L2 OS=Homo sapiens GN=ADGRL2 PE=1 SV=2|Isoform 2 of Adhesion G protein-coupled receptor L2 OS=Homo sapiens GN=ADGRL2|Isoform 5 of Adhesion G protein-coupled receptor L2 OS=Homo sapiens GN=ADGRL2|Isoform 6 of Adhes…	1	4	3	6	6.86185	4.78063	22.2435	20.4621	1.17056e-08	1.77444e-07	10.7102	0.983923	1	1	WT - Control	limma	1.17056e-08	1.77444e-07	TRUE	hit	6.86185
153	AIFM1	O95831|O95831-3	Apoptosis-inducing factor 1, mitochondrial OS=Homo sapiens GN=AIFM1 PE=1 SV=1|Isoform 3 of Apoptosis-inducing factor 1, mitochondrial OS=Homo sapiens GN=AIFM1	1	4	3	13	7.24787	4.59019	23.4192	20.456	1.17352e-08	1.77444e-07	10.7078	0.983928	1	1	WT - Control	limma	1.17352e-08	1.77444e-07	TRUE	hit	7.24787
154	MANEAL	Q5VSG8|Q5VSG8-3	Glycoprotein endo-alpha-1,2-mannosidase-like protein OS=Homo sapiens GN=MANEAL PE=2 SV=1|Isoform 3 of Glycoprotein endo-alpha-1,2-mannosidase-like protein OS=Homo sapiens GN=MANEAL	1	4	3	2	6.57555	4.22557	20.66	20.4517	1.17565e-08	1.77444e-07	10.7061	0.983931	1	1	WT - Control	limma	1.17565e-08	1.77444e-07	TRUE	hit	6.57555
155	CAPN1	P07384	Calpain-1 catalytic subunit OS=Homo sapiens GN=CAPN1 PE=1 SV=1	1	4	3	9	6.9573	3.48537	23.1445	20.4269	1.18788e-08	1.77776e-07	10.6962	0.983951	1	1	WT - Control	limma	1.18788e-08	1.77776e-07	TRUE	hit	6.9573
156	CDC45	O75419|O75419-2|O75419-3	Cell division control protein 45 homolog OS=Homo sapiens GN=CDC45 PE=1 SV=1|Isoform 2 of Cell division control protein 45 homolog OS=Homo sapiens GN=CDC45|Isoform 3 of Cell division control protein 45 homolog OS=Homo sapiens GN=CDC45	1	4	3	4	6.81831	4.04018	21.5273	20.4121	1.19527e-08	1.77776e-07	10.6903	0.983962	1	1	WT - Control	limma	1.19527e-08	1.77776e-07	TRUE	hit	6.81831
157	SEC61A1	B4DR61|P61619	Protein transport protein Sec61 subunit alpha isoform 1 OS=Homo sapiens GN=SEC61A1 PE=1 SV=1|Protein transport protein Sec61 subunit alpha isoform 1 OS=Homo sapiens GN=SEC61A1 PE=1 SV=2	1	4	3	4	6.83942	4.5089	21.6988	20.3917	1.20548e-08	1.77776e-07	10.6822	0.983978	1	1	WT - Control	limma	1.20548e-08	1.77776e-07	TRUE	hit	6.83942
158	RINT1	Q6NUQ1	RAD50-interacting protein 1 OS=Homo sapiens GN=RINT1 PE=1 SV=1	1	4	3	4	6.17917	4.28923	21.1535	20.3843	1.20925e-08	1.77776e-07	10.6793	0.983984	1	1	WT - Control	limma	1.20925e-08	1.77776e-07	TRUE	hit	6.17917
159	AAR2	A2A2Q9|Q9Y312	Protein AAR2 homolog OS=Homo sapiens GN=AAR2 PE=1 SV=1|Protein AAR2 homolog OS=Homo sapiens GN=AAR2 PE=1 SV=2	1	4	3	3	6.35346	3.61722	21.3915	20.3327	1.23568e-08	1.78413e-07	10.6586	0.984025	1	1	WT - Control	limma	1.23568e-08	1.78413e-07	TRUE	hit	6.35346
160	NDUFS7	F5GXJ1|F5H5N1|O75251|O75251-2	NADH dehydrogenase [ubiquinone] iron-sulfur protein 7, mitochondrial OS=Homo sapiens GN=NDUFS7 PE=1 SV=1|NADH dehydrogenase [ubiquinone] iron-sulfur protein 7, mitochondrial OS=Homo sapiens GN=NDUFS7 PE=1 SV=1|NADH dehydrogenase [ubiquinone] iron-sulfur protein 7, mitochondrial OS=Homo sapiens GN=NDUFS7 PE=1 SV=3|Isoform 2 of NADH dehydrogenase [ubiquinone] iron-sulfur protein 7, mitochondrial OS…	1	4	3	3	6.55012	4.30911	22.032	20.3312	1.23647e-08	1.78413e-07	10.658	0.984026	1	1	WT - Control	limma	1.23647e-08	1.78413e-07	TRUE	hit	6.55012
161	SFXN4	Q6P4A7	Sideroflexin-4 OS=Homo sapiens GN=SFXN4 PE=1 SV=1	1	4	3	4	6.94051	3.51866	21.4934	20.3297	1.23723e-08	1.78413e-07	10.6574	0.984027	1	1	WT - Control	limma	1.23723e-08	1.78413e-07	TRUE	hit	6.94051
162	CHPF2	G5E9W2|Q9P2E5	Chondroitin sulfate glucuronyltransferase OS=Homo sapiens GN=CHPF2 PE=1 SV=1|Chondroitin sulfate glucuronyltransferase OS=Homo sapiens GN=CHPF2 PE=2 SV=2	1	4	3	10	6.40226	4.41261	22.4641	20.2853	1.26052e-08	1.80621e-07	10.6396	0.984062	1	1	WT - Control	limma	1.26052e-08	1.80621e-07	TRUE	hit	6.40226
163	BIRC6	Q9NR09	Baculoviral IAP repeat-containing protein 6 OS=Homo sapiens GN=BIRC6 PE=1 SV=2	1	4	3	35	6.87089	5.61039	24.7321	20.2622	1.27285e-08	1.81241e-07	10.6303	0.98408	1	1	WT - Control	limma	1.27285e-08	1.81241e-07	TRUE	hit	6.87089
164	TTK	P33981	Dual specificity protein kinase TTK OS=Homo sapiens GN=TTK PE=1 SV=2	1	4	3	11	6.27709	3.87492	22.8365	20.1279	1.34718e-08	1.90626e-07	10.5761	0.984185	1	1	WT - Control	limma	1.34718e-08	1.90626e-07	TRUE	hit	6.27709
165	GPR98	Q8WXG9	G-protein coupled receptor 98 OS=Homo sapiens GN=GPR98 PE=1 SV=2	1	4	3	6	5.98498	3.70014	21.0246	20.0988	1.36387e-08	1.91788e-07	10.5643	0.984208	1	1	WT - Control	limma	1.36387e-08	1.91788e-07	TRUE	hit	5.98498
166	INTS12	Q96CB8	Integrator complex subunit 12 OS=Homo sapiens GN=INTS12 PE=1 SV=1	1	4	3	5	5.91645	3.47561	21.3596	20.0783	1.3758e-08	1.92272e-07	10.556	0.984224	1	1	WT - Control	limma	1.3758e-08	1.92272e-07	TRUE	hit	5.91645
167	CAD	P27708	CAD protein OS=Homo sapiens GN=CAD PE=1 SV=3	1	4	3	43	7.89759	3.93625	25.5666	20.0494	1.39284e-08	1.9228e-07	10.5442	0.984247	1	1	WT - Control	limma	1.39284e-08	1.9228e-07	TRUE	hit	7.89759
168	HK2	P52789	Hexokinase-2 OS=Homo sapiens GN=HK2 PE=1 SV=2	1	4	3	14	6.77599	4.41708	23.1693	20.0082	1.41749e-08	1.94497e-07	10.5274	0.984279	1	1	WT - Control	limma	1.41749e-08	1.94497e-07	TRUE	hit	6.77599
169	TAP2	X5CMH5	Antigen peptide transporter 2 OS=Homo sapiens GN=TAP2 PE=1 SV=1	1	4	3	4	6.28933	4.74688	21.5965	19.9288	1.46636e-08	1.99644e-07	10.4949	0.984342	1	1	WT - Control	limma	1.46636e-08	1.99644e-07	TRUE	hit	6.28933
170	NF1	P21359|P21359-2|P21359-6	Neurofibromin OS=Homo sapiens GN=NF1 PE=1 SV=2|Isoform 1 of Neurofibromin OS=Homo sapiens GN=NF1|Isoform 6 of Neurofibromin OS=Homo sapiens GN=NF1	1	4	3	7	5.91265	3.70369	21.9751	19.9188	1.47264e-08	1.99644e-07	10.4908	0.98435	1	1	WT - Control	limma	1.47264e-08	1.99644e-07	TRUE	hit	5.91265
171	SPATA5	Q8NB90	Spermatogenesis-associated protein 5 OS=Homo sapiens GN=SPATA5 PE=1 SV=3	1	4	3	5	6.22349	3.7672	21.8602	19.9021	1.48325e-08	1.99885e-07	10.4839	0.984363	1	1	WT - Control	limma	1.48325e-08	1.99885e-07	TRUE	hit	6.22349
172	ATM	Q13315	Serine-protein kinase ATM OS=Homo sapiens GN=ATM PE=1 SV=4	1	4	3	6	6.24262	3.87761	21.1229	19.8641	1.50762e-08	2.01967e-07	10.4682	0.984393	1	1	WT - Control	limma	1.50762e-08	2.01967e-07	TRUE	hit	6.24262
173	SERAC1	Q96JX3	Protein SERAC1 OS=Homo sapiens GN=SERAC1 PE=1 SV=1	1	4	3	5	6.33965	4.07486	21.006	19.7615	1.57563e-08	2.09836e-07	10.4258	0.984473	1	1	WT - Control	limma	1.57563e-08	2.09836e-07	TRUE	hit	6.33965
174	LPGAT1	Q92604	Acyl-CoA:lysophosphatidylglycerol acyltransferase 1 OS=Homo sapiens GN=LPGAT1 PE=1 SV=1	1	4	3	2	6.14863	4.66179	21.7688	19.747	7.16521e-08	4.48122e-07	8.96764	0.984485	1	1	WT - Control	limma	7.16521e-08	4.48122e-07	TRUE	hit	6.14863
175	LPCAT2	Q7L5N7	Lysophosphatidylcholine acyltransferase 2 OS=Homo sapiens GN=LPCAT2 PE=1 SV=1	1	4	3	5	6.04417	3.62309	21.621	19.6991	1.61871e-08	2.14313e-07	10.3999	0.984522	1	1	WT - Control	limma	1.61871e-08	2.14313e-07	TRUE	hit	6.04417
176	PMS1	P54277|P54277-3	PMS1 protein homolog 1 OS=Homo sapiens GN=PMS1 PE=1 SV=1|Isoform 3 of PMS1 protein homolog 1 OS=Homo sapiens GN=PMS1	1	4	3	10	6.30941	4.14235	22.486	19.654	1.65066e-08	2.17273e-07	10.3811	0.984558	1	1	WT - Control	limma	1.65066e-08	2.17273e-07	TRUE	hit	6.30941
177	SPG20	Q8N0X7	Spartin OS=Homo sapiens GN=SPG20 PE=1 SV=1	1	4	3	2	6.18461	3.45835	21.5326	19.6381	1.66206e-08	2.17509e-07	10.3744	0.98457	1	1	WT - Control	limma	1.66206e-08	2.17509e-07	TRUE	hit	6.18461
178	NGLY1	A0A0C4DFP4|Q96IV0|Q96IV0-2|Q96IV0-3|Q96IV0-5	Peptide-N(4)-(N-acetyl-beta-glucosaminyl)asparagine amidase (Fragment) OS=Homo sapiens GN=NGLY1 PE=1 SV=1|Peptide-N(4)-(N-acetyl-beta-glucosaminyl)asparagine amidase OS=Homo sapiens GN=NGLY1 PE=1 SV=1|Isoform 2 of Peptide-N(4)-(N-acetyl-beta-glucosaminyl)asparagine amidase OS=Homo sapiens GN=NGLY1|Isoform 3 of Peptide-N(4)-(N-acetyl-beta-glucosaminyl)asparagine amidase OS=Homo sapiens GN=NGLY1|Is…	1	4	3	5	6.80059	5.22314	22.5006	19.6345	7.48143e-08	4.57301e-07	8.78557	0.984573	1	1	WT - Control	limma	7.48143e-08	4.57301e-07	TRUE	hit	6.80059
179	CALR	P27797	Calreticulin OS=Homo sapiens GN=CALR PE=1 SV=1	1	4	3	7	7.15708	5.3244	23.2646	19.6122	1.68087e-08	2.18706e-07	10.3636	0.984591	1	1	WT - Control	limma	1.68087e-08	2.18706e-07	TRUE	hit	7.15708
180	SMC2	O95347	Structural maintenance of chromosomes protein 2 OS=Homo sapiens GN=SMC2 PE=1 SV=2	1	4	3	21	6.68005	3.9315	24.5241	19.567	1.71424e-08	2.19869e-07	10.3446	0.984626	1	1	WT - Control	limma	1.71424e-08	2.19869e-07	TRUE	hit	6.68005
181	EXOC2	Q96KP1	Exocyst complex component 2 OS=Homo sapiens GN=EXOC2 PE=1 SV=1	1	4	3	6	6.1223	3.35117	21.4643	19.5668	1.71438e-08	2.19869e-07	10.3446	0.984626	1	1	WT - Control	limma	1.71438e-08	2.19869e-07	TRUE	hit	6.1223
182	HSPA5	P11021	78 kDa glucose-regulated protein OS=Homo sapiens GN=HSPA5 PE=1 SV=2	1	4	3	33	8.41942	5.39041	26.1327	19.5607	1.71894e-08	2.19869e-07	10.342	0.984631	1	1	WT - Control	limma	1.71894e-08	2.19869e-07	TRUE	hit	8.41942
183	CNNM3	Q8NE01	Metal transporter CNNM3 OS=Homo sapiens GN=CNNM3 PE=1 SV=1	1	4	3	6	6.52526	4.52528	22.7479	19.4503	1.80389e-08	2.26689e-07	10.2955	0.984718	1	1	WT - Control	limma	1.80389e-08	2.26689e-07	TRUE	hit	6.52526
184	MCM3AP	O60318	Germinal-center associated nuclear protein OS=Homo sapiens GN=MCM3AP PE=1 SV=2	1	4	3	9	6.30135	4.05105	21.4945	19.4447	1.80831e-08	2.26689e-07	10.2931	0.984722	1	1	WT - Control	limma	1.80831e-08	2.26689e-07	TRUE	hit	6.30135
185	ACSL3	O95573	Long-chain-fatty-acid--CoA ligase 3 OS=Homo sapiens GN=ACSL3 PE=1 SV=3	1	4	3	8	6.76733	3.46279	22.1538	19.4234	1.82528e-08	2.26689e-07	10.2841	0.984739	1	1	WT - Control	limma	1.82528e-08	2.26689e-07	TRUE	hit	6.76733
186	ATP2C1	B4E2Q0|P98194|P98194-4	Calcium-transporting ATPase OS=Homo sapiens GN=ATP2C1 PE=1 SV=1|Calcium-transporting ATPase type 2C member 1 OS=Homo sapiens GN=ATP2C1 PE=1 SV=3|Isoform 4 of Calcium-transporting ATPase type 2C member 1 OS=Homo sapiens GN=ATP2C1	1	4	3	3	6.08789	3.40714	21.0584	19.4193	1.82858e-08	2.26689e-07	10.2823	0.984742	1	1	WT - Control	limma	1.82858e-08	2.26689e-07	TRUE	hit	6.08789
187	RPTOR	Q8N122|Q8N122-3	Regulatory-associated protein of mTOR OS=Homo sapiens GN=RPTOR PE=1 SV=1|Isoform 3 of Regulatory-associated protein of mTOR OS=Homo sapiens GN=RPTOR	1	4	3	8	6.53627	3.31071	23.197	19.4163	1.831e-08	2.26689e-07	10.2811	0.984744	1	1	WT - Control	limma	1.831e-08	2.26689e-07	TRUE	hit	6.53627
188	RAB29	E9PL56|O14966|O14966-2	Ras-related protein Rab-7L1 OS=Homo sapiens GN=RAB29 PE=1 SV=1|Ras-related protein Rab-7L1 OS=Homo sapiens GN=RAB29 PE=1 SV=1|Isoform 2 of Ras-related protein Rab-7L1 OS=Homo sapiens GN=RAB29	1	4	3	2	6.25481	4.31043	21.2745	19.4075	1.83802e-08	2.26689e-07	10.2774	0.984751	1	1	WT - Control	limma	1.83802e-08	2.26689e-07	TRUE	hit	6.25481
189	ARFGEF2	Q9Y6D5	Brefeldin A-inhibited guanine nucleotide-exchange protein 2 OS=Homo sapiens GN=ARFGEF2 PE=1 SV=3	1	4	3	7	6.29238	3.943	22.0527	19.4022	1.84235e-08	2.26689e-07	10.2751	0.984756	1	1	WT - Control	limma	1.84235e-08	2.26689e-07	TRUE	hit	6.29238
190	RCE1	E9PI08|Q9Y256	CAAX prenyl protease 2 OS=Homo sapiens GN=RCE1 PE=1 SV=1|CAAX prenyl protease 2 OS=Homo sapiens GN=RCE1 PE=1 SV=1	1	4	3	3	6.58292	4.4978	20.8226	19.3771	1.86272e-08	2.27957e-07	10.2645	0.984775	1	1	WT - Control	limma	1.86272e-08	2.27957e-07	TRUE	hit	6.58292
191	UBR5	E7EMW7|O95071|O95071-2	E3 ubiquitin-protein ligase UBR5 OS=Homo sapiens GN=UBR5 PE=1 SV=1|E3 ubiquitin-protein ligase UBR5 OS=Homo sapiens GN=UBR5 PE=1 SV=2|Isoform 2 of E3 ubiquitin-protein ligase UBR5 OS=Homo sapiens GN=UBR5	1	4	3	11	6.34903	3.34279	22.4199	19.3207	1.90961e-08	2.30093e-07	10.2404	0.98482	1	1	WT - Control	limma	1.90961e-08	2.30093e-07	TRUE	hit	6.34903
192	ERCC2	P18074	TFIIH basal transcription factor complex helicase XPD subunit OS=Homo sapiens GN=ERCC2 PE=1 SV=1	1	4	3	9	6.33007	4.18245	21.978	19.3104	1.91832e-08	2.30093e-07	10.236	0.984828	1	1	WT - Control	limma	1.91832e-08	2.30093e-07	TRUE	hit	6.33007
193	DDX20	Q9UHI6	Probable ATP-dependent RNA helicase DDX20 OS=Homo sapiens GN=DDX20 PE=1 SV=2	1	4	3	4	6.55413	3.8593	22.0477	19.3074	1.92078e-08	2.30093e-07	10.2348	0.98483	1	1	WT - Control	limma	1.92078e-08	2.30093e-07	TRUE	hit	6.55413
194	RPS27	P42677	40S ribosomal protein S27 OS=Homo sapiens GN=RPS27 PE=1 SV=3	1	4	3	2	7.09776	3.69579	21.7608	19.3018	1.92554e-08	2.30093e-07	10.2324	0.984834	1	1	WT - Control	limma	1.92554e-08	2.30093e-07	TRUE	hit	7.09776
195	TXN	P10599|P10599-2	Thioredoxin OS=Homo sapiens GN=TXN PE=1 SV=3|Isoform 2 of Thioredoxin OS=Homo sapiens GN=TXN	1	4	3	3	6.91169	3.71293	22.0271	19.2954	1.93099e-08	2.30093e-07	10.2297	0.984839	1	1	WT - Control	limma	1.93099e-08	2.30093e-07	TRUE	hit	6.91169
196	CDC7	O00311	Cell division cycle 7-related protein kinase OS=Homo sapiens GN=CDC7 PE=1 SV=1	1	4	3	7	6.73615	4.58404	22.6131	19.2477	1.97216e-08	2.33768e-07	10.2092	0.984877	1	1	WT - Control	limma	1.97216e-08	2.33768e-07	TRUE	hit	6.73615
197	RIPK4	P57078|P57078-2	Receptor-interacting serine/threonine-protein kinase 4 OS=Homo sapiens GN=RIPK4 PE=1 SV=1|Isoform 2 of Receptor-interacting serine/threonine-protein kinase 4 OS=Homo sapiens GN=RIPK4	1	4	3	3	5.81073	3.53089	20.4654	19.2251	1.992e-08	2.3489e-07	10.1996	0.984895	1	1	WT - Control	limma	1.992e-08	2.3489e-07	TRUE	hit	5.81073
198	SMC3	Q9UQE7	Structural maintenance of chromosomes protein 3 OS=Homo sapiens GN=SMC3 PE=1 SV=2	1	4	3	35	6.92186	3.22818	25.0656	19.2122	2.00343e-08	2.35014e-07	10.194	0.984905	1	1	WT - Control	limma	2.00343e-08	2.35014e-07	TRUE	hit	6.92186
199	ADPGK	Q9BRR6|Q9BRR6-2	ADP-dependent glucokinase OS=Homo sapiens GN=ADPGK PE=1 SV=1|Isoform 2 of ADP-dependent glucokinase OS=Homo sapiens GN=ADPGK	1	4	3	2	6.31247	4.10245	21.4768	19.1496	9.03785e-08	5.04912e-07	8.7536	0.984954	1	1	WT - Control	limma	9.03785e-08	5.04912e-07	TRUE	hit	6.31247
200	MELK	Q14680|Q14680-6	Maternal embryonic leucine zipper kinase OS=Homo sapiens GN=MELK PE=1 SV=3|Isoform 6 of Maternal embryonic leucine zipper kinase OS=Homo sapiens GN=MELK	1	4	3	9	6.40274	3.80527	22.6966	19.1485	2.06086e-08	2.37048e-07	10.1666	0.984955	1	1	WT - Control	limma	2.06086e-08	2.37048e-07	TRUE	hit	6.40274
201	PTPRF	P10586|P10586-2	Receptor-type tyrosine-protein phosphatase F OS=Homo sapiens GN=PTPRF PE=1 SV=2|Isoform 2 of Receptor-type tyrosine-protein phosphatase F OS=Homo sapiens GN=PTPRF	1	4	3	7	6.10989	3.63932	21.269	19.1472	2.06208e-08	2.37048e-07	10.1661	0.984956	1	1	WT - Control	limma	2.06208e-08	2.37048e-07	TRUE	hit	6.10989
202	SMC1A	G8JLG1|Q14683	Structural maintenance of chromosomes protein OS=Homo sapiens GN=SMC1A PE=1 SV=2|Structural maintenance of chromosomes protein 1A OS=Homo sapiens GN=SMC1A PE=1 SV=2	1	4	3	25	6.99164	3.84135	24.7594	19.1425	2.06632e-08	2.37048e-07	10.1641	0.98496	1	1	WT - Control	limma	2.06632e-08	2.37048e-07	TRUE	hit	6.99164
203	FAM20B	O75063	Glycosaminoglycan xylosylkinase OS=Homo sapiens GN=FAM20B PE=1 SV=1	1	4	3	4	5.85645	3.57291	20.6885	19.1376	2.07089e-08	2.37048e-07	10.1619	0.984963	1	1	WT - Control	limma	2.07089e-08	2.37048e-07	TRUE	hit	5.85645
204	APP	E9PG40|P05067|P05067-5|P05067-6|P05067-9	Amyloid beta A4 protein OS=Homo sapiens GN=APP PE=1 SV=1|Amyloid beta A4 protein OS=Homo sapiens GN=APP PE=1 SV=3|Isoform L-APP696 of Amyloid beta A4 protein OS=Homo sapiens GN=APP|Isoform APP714 of Amyloid beta A4 protein OS=Homo sapiens GN=APP|Isoform L-APP752 of Amyloid beta A4 protein OS=Homo sapiens GN=APP	1	4	3	6	6.52638	3.88899	21.9165	19.1352	2.07312e-08	2.37048e-07	10.1609	0.984965	1	1	WT - Control	limma	2.07312e-08	2.37048e-07	TRUE	hit	6.52638
205	PPM1F	P49593	Protein phosphatase 1F OS=Homo sapiens GN=PPM1F PE=1 SV=3	1	4	3	8	6.97956	4.05747	22.6547	19.1077	2.09859e-08	2.37601e-07	10.149	0.984987	1	1	WT - Control	limma	2.09859e-08	2.37601e-07	TRUE	hit	6.97956
206	SETX	Q7Z333|Q7Z333-3|Q7Z333-4	Probable helicase senataxin OS=Homo sapiens GN=SETX PE=1 SV=4|Isoform 3 of Probable helicase senataxin OS=Homo sapiens GN=SETX|Isoform 4 of Probable helicase senataxin OS=Homo sapiens GN=SETX	1	4	3	6	6.04868	3.33301	21.7781	19.1073	2.09895e-08	2.37601e-07	10.1489	0.984987	1	1	WT - Control	limma	2.09895e-08	2.37601e-07	TRUE	hit	6.04868
207	INPP5F	Q9Y2H2	Phosphatidylinositide phosphatase SAC2 OS=Homo sapiens GN=INPP5F PE=1 SV=3	1	4	3	9	6.34904	3.42458	22.4243	19.068	2.13611e-08	2.40604e-07	10.1318	0.985018	1	1	WT - Control	limma	2.13611e-08	2.40604e-07	TRUE	hit	6.34904
208	TIMM50	Q3ZCQ8|Q3ZCQ8-2	Mitochondrial import inner membrane translocase subunit TIM50 OS=Homo sapiens GN=TIMM50 PE=1 SV=2|Isoform 2 of Mitochondrial import inner membrane translocase subunit TIM50 OS=Homo sapiens GN=TIMM50	1	4	3	10	7.49695	4.74594	24.0477	19.047	2.15622e-08	2.41668e-07	10.1228	0.985035	1	1	WT - Control	limma	2.15622e-08	2.41668e-07	TRUE	hit	7.49695
209	RPL23	P62829	60S ribosomal protein L23 OS=Homo sapiens GN=RPL23 PE=1 SV=1	1	4	3	6	7.48504	4.03399	23.1048	19.0187	2.18372e-08	2.43544e-07	10.1105	0.985057	1	1	WT - Control	limma	2.18372e-08	2.43544e-07	TRUE	hit	7.48504
210	MLH1	H0Y818|P40692	DNA mismatch repair protein Mlh1 (Fragment) OS=Homo sapiens GN=MLH1 PE=1 SV=1|DNA mismatch repair protein Mlh1 OS=Homo sapiens GN=MLH1 PE=1 SV=1	1	4	3	7	6.60376	3.45952	21.7153	19.0027	2.19941e-08	2.44092e-07	10.1035	0.985069	1	1	WT - Control	limma	2.19941e-08	2.44092e-07	TRUE	hit	6.60376
211	SARM1	Q6SZW1|Q6SZW1-2	Sterile alpha and TIR motif-containing protein 1 OS=Homo sapiens GN=SARM1 PE=1 SV=1|Isoform 2 of Sterile alpha and TIR motif-containing protein 1 OS=Homo sapiens GN=SARM1	1	4	3	2	5.95622	3.75657	20.5965	18.9596	2.24228e-08	2.47635e-07	10.0847	0.985103	1	1	WT - Control	limma	2.24228e-08	2.47635e-07	TRUE	hit	5.95622
212	MAGED1	Q9Y5V3|Q9Y5V3-2	Melanoma-associated antigen D1 OS=Homo sapiens GN=MAGED1 PE=1 SV=3|Isoform 2 of Melanoma-associated antigen D1 OS=Homo sapiens GN=MAGED1	1	4	3	6	6.17884	3.8883	21.5229	18.9337	2.26855e-08	2.48067e-07	10.0734	0.985124	1	1	WT - Control	limma	2.26855e-08	2.48067e-07	TRUE	hit	6.17884
213	ARFGEF3	Q5TH69	Brefeldin A-inhibited guanine nucleotide-exchange protein 3 OS=Homo sapiens GN=ARFGEF3 PE=1 SV=3	1	4	3	4	5.81639	3.9014	20.9212	18.9336	9.84636e-08	5.41725e-07	8.67404	0.985124	1	1	WT - Control	limma	9.84636e-08	5.41725e-07	TRUE	hit	5.81639
214	BBS2	Q9BXC9	Bardet-Biedl syndrome 2 protein OS=Homo sapiens GN=BBS2 PE=1 SV=1	1	4	3	9	6.1996	3.60503	21.7791	18.926	2.27642e-08	2.48067e-07	10.0701	0.98513	1	1	WT - Control	limma	2.27642e-08	2.48067e-07	TRUE	hit	6.1996
215	ITM2C	C9JG41|Q9NQX7|Q9NQX7-2	Integral membrane protein 2C (Fragment) OS=Homo sapiens GN=ITM2C PE=1 SV=1|Integral membrane protein 2C OS=Homo sapiens GN=ITM2C PE=1 SV=1|Isoform 2 of Integral membrane protein 2C OS=Homo sapiens GN=ITM2C	1	4	3	3	6.43191	3.90494	20.5911	18.9234	2.27906e-08	2.48067e-07	10.0689	0.985132	1	1	WT - Control	limma	2.27906e-08	2.48067e-07	TRUE	hit	6.43191
216	ATAD3A	H0Y2W2|Q9NVI7-2	ATPase family AAA domain-containing protein 3A (Fragment) OS=Homo sapiens GN=ATAD3A PE=1 SV=1|Isoform 2 of ATPase family AAA domain-containing protein 3A OS=Homo sapiens GN=ATAD3A	1	4	3	10	7.03885	4.11248	23.2488	18.8949	2.30846e-08	2.50065e-07	10.0565	0.985154	1	1	WT - Control	limma	2.30846e-08	2.50065e-07	TRUE	hit	7.03885
217	THADA	Q6YHU6|Q6YHU6-3	Thyroid adenoma-associated protein OS=Homo sapiens GN=THADA PE=1 SV=1|Isoform 3 of Thyroid adenoma-associated protein OS=Homo sapiens GN=THADA	1	4	3	6	6.09589	3.94205	21.5054	18.8843	2.31957e-08	2.50072e-07	10.0518	0.985162	1	1	WT - Control	limma	2.31957e-08	2.50072e-07	TRUE	hit	6.09589
218	SEL1L	Q9UBV2	Protein sel-1 homolog 1 OS=Homo sapiens GN=SEL1L PE=1 SV=3	1	4	3	14	7.60828	3.54916	23.6766	18.8521	2.35349e-08	2.50855e-07	10.0377	0.985188	1	1	WT - Control	limma	2.35349e-08	2.50855e-07	TRUE	hit	7.60828
219	PHKG2	J3KNN3|P15735|P15735-2	Phosphorylase b kinase gamma catalytic chain, liver/testis isoform OS=Homo sapiens GN=PHKG2 PE=1 SV=1|Phosphorylase b kinase gamma catalytic chain, liver/testis isoform OS=Homo sapiens GN=PHKG2 PE=1 SV=1|Isoform 2 of Phosphorylase b kinase gamma catalytic chain, liver/testis isoform OS=Homo sapiens GN=PHKG2	1	4	3	5	6.07136	3.3166	20.7939	18.8459	2.36007e-08	2.50855e-07	10.035	0.985193	1	1	WT - Control	limma	2.36007e-08	2.50855e-07	TRUE	hit	6.07136
220	COCH	O43405	Cochlin OS=Homo sapiens GN=COCH PE=1 SV=1	1	4	3	3	6.59785	4.17729	21.4456	18.8412	2.36513e-08	2.50855e-07	10.0329	0.985196	1	1	WT - Control	limma	2.36513e-08	2.50855e-07	TRUE	hit	6.59785
221	SMG5	Q9UPR3	Protein SMG5 OS=Homo sapiens GN=SMG5 PE=1 SV=3	1	4	3	2	6.0584	3.24485	20.9228	18.8355	2.37116e-08	2.50855e-07	10.0304	0.985201	1	1	WT - Control	limma	2.37116e-08	2.50855e-07	TRUE	hit	6.0584
222	HNRNPF	P52597	Heterogeneous nuclear ribonucleoprotein F OS=Homo sapiens GN=HNRNPF PE=1 SV=3	1	4	3	9	6.97452	3.35643	23.6361	18.802	2.40732e-08	2.52362e-07	10.0157	0.985227	1	1	WT - Control	limma	2.40732e-08	2.52362e-07	TRUE	hit	6.97452
223	IPO13	O94829	Importin-13 OS=Homo sapiens GN=IPO13 PE=1 SV=3	1	4	3	3	6.32613	3.66623	20.5577	18.7951	2.41488e-08	2.52362e-07	10.0126	0.985232	1	1	WT - Control	limma	2.41488e-08	2.52362e-07	TRUE	hit	6.32613
224	SLC7A5	Q01650	Large neutral amino acids transporter small subunit 1 OS=Homo sapiens GN=SLC7A5 PE=1 SV=2	1	4	3	2	6.46353	4.15157	20.8035	18.7915	2.41884e-08	2.52362e-07	10.011	0.985235	1	1	WT - Control	limma	2.41884e-08	2.52362e-07	TRUE	hit	6.46353
225	CALU	O43852|O43852-3|O43852-4	Calumenin OS=Homo sapiens GN=CALU PE=1 SV=2|Isoform 3 of Calumenin OS=Homo sapiens GN=CALU|Isoform 4 of Calumenin OS=Homo sapiens GN=CALU	1	4	3	9	6.94375	3.18814	23.7514	18.7652	2.44779e-08	2.54211e-07	9.99943	0.985256	1	1	WT - Control	limma	2.44779e-08	2.54211e-07	TRUE	hit	6.94375
226	CLPTM1L	G5E9Z2	Cisplatin resistance related protein CRR9p, isoform CRA_c OS=Homo sapiens GN=CLPTM1L PE=1 SV=1	1	4	3	4	6.39483	4.43444	21.3148	18.7543	2.45997e-08	2.54309e-07	9.9946	0.985265	1	1	WT - Control	limma	2.45997e-08	2.54309e-07	TRUE	hit	6.39483
227	RPS10	P46783	40S ribosomal protein S10 OS=Homo sapiens GN=RPS10 PE=1 SV=1	1	4	3	4	6.50058	3.54463	22.2651	18.7146	2.50469e-08	2.57755e-07	9.97705	0.985296	1	1	WT - Control	limma	2.50469e-08	2.57755e-07	TRUE	hit	6.50058
228	TARS2	Q9BW92|U3KQG0	Threonine--tRNA ligase, mitochondrial OS=Homo sapiens GN=TARS2 PE=1 SV=1|Threonine--tRNA ligase, mitochondrial OS=Homo sapiens GN=TARS2 PE=1 SV=1	1	4	3	8	6.72243	3.39962	22.0699	18.6997	2.5217e-08	2.58332e-07	9.97045	0.985307	1	1	WT - Control	limma	2.5217e-08	2.58332e-07	TRUE	hit	6.72243
229	MAPKAP1	Q9BPZ7|Q9BPZ7-2|Q9BPZ7-3|Q9BPZ7-5|Q9BPZ7-6	Target of rapamycin complex 2 subunit MAPKAP1 OS=Homo sapiens GN=MAPKAP1 PE=1 SV=2|Isoform 2 of Target of rapamycin complex 2 subunit MAPKAP1 OS=Homo sapiens GN=MAPKAP1|Isoform 3 of Target of rapamycin complex 2 subunit MAPKAP1 OS=Homo sapiens GN=MAPKAP1|Isoform 5 of Target of rapamycin complex 2 subunit MAPKAP1 OS=Homo sapiens GN=MAPKAP1|Isoform 6 of Target of rapamycin complex 2 subunit MAPKAP1…	1	4	3	2	5.85764	3.39091	20.7149	18.6758	2.54933e-08	2.59986e-07	9.95982	0.985326	1	1	WT - Control	limma	2.54933e-08	2.59986e-07	TRUE	hit	5.85764
230	DHRS7B	A0A0C4DGQ8|Q6IAN0	Dehydrogenase/reductase SDR family member 7B OS=Homo sapiens GN=DHRS7B PE=1 SV=1|Dehydrogenase/reductase SDR family member 7B OS=Homo sapiens GN=DHRS7B PE=1 SV=2	1	4	3	3	6.28173	3.5694	22.0178	18.6613	2.56625e-08	2.60538e-07	9.95337	0.985338	1	1	WT - Control	limma	2.56625e-08	2.60538e-07	TRUE	hit	6.28173
231	P4HA2	O15460|O15460-2	Prolyl 4-hydroxylase subunit alpha-2 OS=Homo sapiens GN=P4HA2 PE=1 SV=1|Isoform IIa of Prolyl 4-hydroxylase subunit alpha-2 OS=Homo sapiens GN=P4HA2	1	4	3	5	6.60457	3.25919	21.7724	18.6473	2.58268e-08	2.61035e-07	9.94715	0.985349	1	1	WT - Control	limma	2.58268e-08	2.61035e-07	TRUE	hit	6.60457
232	MLH3	Q9UHC1	DNA mismatch repair protein Mlh3 OS=Homo sapiens GN=MLH3 PE=1 SV=3	1	4	3	4	5.81447	4.01784	20.854	18.6447	1.10584e-07	5.70074e-07	8.56575	0.985351	1	1	WT - Control	limma	1.10584e-07	5.70074e-07	TRUE	hit	5.81447
233	ATP7B	B7ZLR4|E7ET55|F5H562|F5H748|P35670|P35670-2|P35670-3|P35670-4	ATP7B protein OS=Homo sapiens GN=ATP7B PE=1 SV=1|Copper-transporting ATPase 2 OS=Homo sapiens GN=ATP7B PE=1 SV=2|Copper-transporting ATPase 2 OS=Homo sapiens GN=ATP7B PE=1 SV=1|Copper-transporting ATPase 2 OS=Homo sapiens GN=ATP7B PE=1 SV=1|Copper-transporting ATPase 2 OS=Homo sapiens GN=ATP7B PE=1 SV=4|Isoform 2 of Copper-transporting ATPase 2 OS=Homo sapiens GN=ATP7B|Isoform 3 of Copper-transpo…	1	4	3	4	5.78006	3.57524	20.7861	18.6326	2.6e-08	2.61617e-07	9.94063	0.98536	1	1	WT - Control	limma	2.6e-08	2.61617e-07	TRUE	hit	5.78006
234	PCSK6	A0A087WY68|A0A087WZR0|H7BXT3|P29122|P29122-2|P29122-4|P29122-5|P29122-7|P29122-8	Proprotein convertase subtilisin/kexin type 6 OS=Homo sapiens GN=PCSK6 PE=1 SV=1|Proprotein convertase subtilisin/kexin type 6 OS=Homo sapiens GN=PCSK6 PE=1 SV=1|Proprotein convertase subtilisin/kexin type 6 OS=Homo sapiens GN=PCSK6 PE=1 SV=2|Proprotein convertase subtilisin/kexin type 6 OS=Homo sapiens GN=PCSK6 PE=1 SV=1|Isoform PACE4A-II of Proprotein convertase subtilisin/kexin type 6 OS=Homo …	1	4	3	5	6.86378	3.92711	21.9089	18.6045	2.63362e-08	2.63828e-07	9.92809	0.985382	1	1	WT - Control	limma	2.63362e-08	2.63828e-07	TRUE	hit	6.86378
235	PREB	Q9HCU5	Prolactin regulatory element-binding protein OS=Homo sapiens GN=PREB PE=1 SV=2	1	4	3	7	6.5918	4.43662	22.327	18.592	2.64864e-08	2.64164e-07	9.92253	0.985392	1	1	WT - Control	limma	2.64864e-08	2.64164e-07	TRUE	hit	6.5918
236	SLC37A4	O43826|O43826-2|U3KPU7|U3KQS2	Glucose-6-phosphate exchanger SLC37A4 OS=Homo sapiens GN=SLC37A4 PE=1 SV=1|Isoform 2 of Glucose-6-phosphate exchanger SLC37A4 OS=Homo sapiens GN=SLC37A4|Glucose-6-phosphate translocase OS=Homo sapiens GN=SLC37A4 PE=1 SV=2|Glucose-6-phosphate translocase OS=Homo sapiens GN=SLC37A4 PE=1 SV=2	1	4	3	3	6.27531	4.10086	21.1555	18.5725	1.13868e-07	5.79739e-07	8.53836	0.985407	1	1	WT - Control	limma	1.13868e-07	5.79739e-07	TRUE	hit	6.27531
237	PRKD2	B4DTS2|Q9BZL6	Serine/threonine-protein kinase OS=Homo sapiens GN=PRKD2 PE=1 SV=1|Serine/threonine-protein kinase D2 OS=Homo sapiens GN=PRKD2 PE=1 SV=2	1	4	3	3	6.19577	3.2392	20.4215	18.5463	2.70476e-08	2.6781e-07	9.90206	0.985428	1	1	WT - Control	limma	2.70476e-08	2.6781e-07	TRUE	hit	6.19577
238	ERGIC3	H0Y5K5|Q9Y282|Q9Y282-3	Endoplasmic reticulum-Golgi intermediate compartment protein 3 (Fragment) OS=Homo sapiens GN=ERGIC3 PE=1 SV=1|Endoplasmic reticulum-Golgi intermediate compartment protein 3 OS=Homo sapiens GN=ERGIC3 PE=1 SV=1|Isoform 3 of Endoplasmic reticulum-Golgi intermediate compartment protein 3 OS=Homo sapiens GN=ERGIC3	1	4	3	3	6.32882	3.88616	21.3559	18.5433	1.15231e-07	5.79739e-07	8.52722	0.98543	1	1	WT - Control	limma	1.15231e-07	5.79739e-07	TRUE	hit	6.32882
239	SLC25A12	O75746	Calcium-binding mitochondrial carrier protein Aralar1 OS=Homo sapiens GN=SLC25A12 PE=1 SV=2	1	4	3	8	6.49877	4.15842	22.5082	18.543	2.70885e-08	2.6781e-07	9.90059	0.985431	1	1	WT - Control	limma	2.70885e-08	2.6781e-07	TRUE	hit	6.49877
240	MTMR3	Q13615|Q13615-2|Q13615-3	Myotubularin-related protein 3 OS=Homo sapiens GN=MTMR3 PE=1 SV=3|Isoform A of Myotubularin-related protein 3 OS=Homo sapiens GN=MTMR3|Isoform C of Myotubularin-related protein 3 OS=Homo sapiens GN=MTMR3	1	4	3	19	6.88829	5.20388	23.4897	18.4949	2.76921e-08	2.71062e-07	9.87905	0.985468	1	1	WT - Control	limma	2.76921e-08	2.71062e-07	TRUE	hit	6.88829
241	RRBP1	A0A0A0MRV0|Q9P2E9|Q9P2E9-2	Ribosome-binding protein 1 OS=Homo sapiens GN=RRBP1 PE=1 SV=1|Ribosome-binding protein 1 OS=Homo sapiens GN=RRBP1 PE=1 SV=4|Isoform 1 of Ribosome-binding protein 1 OS=Homo sapiens GN=RRBP1	1	4	3	31	7.03167	4.98894	24.9728	18.4759	2.79359e-08	2.71062e-07	9.87048	0.985483	1	1	WT - Control	limma	2.79359e-08	2.71062e-07	TRUE	hit	7.03167
242	RAF1	P04049|P04049-2	RAF proto-oncogene serine/threonine-protein kinase OS=Homo sapiens GN=RAF1 PE=1 SV=1|Isoform 2 of RAF proto-oncogene serine/threonine-protein kinase OS=Homo sapiens GN=RAF1	1	4	3	6	6.6433	3.82651	22.5088	18.4568	2.81827e-08	2.71062e-07	9.86189	0.985498	1	1	WT - Control	limma	2.81827e-08	2.71062e-07	TRUE	hit	6.6433
243	DDX23	Q9BUQ8	Probable ATP-dependent RNA helicase DDX23 OS=Homo sapiens GN=DDX23 PE=1 SV=3	1	4	3	10	6.76371	3.62593	22.9899	18.453	2.82318e-08	2.71062e-07	9.86018	0.985501	1	1	WT - Control	limma	2.82318e-08	2.71062e-07	TRUE	hit	6.76371
244	SMG7	E9PD50|Q92540|Q92540-2|Q92540-4|Q92540-5	Protein SMG7 OS=Homo sapiens GN=SMG7 PE=1 SV=1|Protein SMG7 OS=Homo sapiens GN=SMG7 PE=1 SV=2|Isoform 2 of Protein SMG7 OS=Homo sapiens GN=SMG7|Isoform 4 of Protein SMG7 OS=Homo sapiens GN=SMG7|Isoform 5 of Protein SMG7 OS=Homo sapiens GN=SMG7	1	4	3	5	6.24244	3.29488	21.7194	18.4443	2.83447e-08	2.71062e-07	9.85628	0.985508	1	1	WT - Control	limma	2.83447e-08	2.71062e-07	TRUE	hit	6.24244
245	SNAP47	A0A087X0B7|Q5SQN1	Synaptosomal-associated protein 47 OS=Homo sapiens GN=SNAP47 PE=1 SV=1|Synaptosomal-associated protein 47 OS=Homo sapiens GN=SNAP47 PE=1 SV=3	1	4	3	6	6.34237	3.21097	21.4966	18.4434	2.83569e-08	2.71062e-07	9.85586	0.985509	1	1	WT - Control	limma	2.83569e-08	2.71062e-07	TRUE	hit	6.34237
246	PPP6R1	Q9UPN7	Serine/threonine-protein phosphatase 6 regulatory subunit 1 OS=Homo sapiens GN=PPP6R1 PE=1 SV=5	1	4	3	3	5.86184	3.51799	20.5806	18.4323	2.85025e-08	2.71062e-07	9.85085	0.985518	1	1	WT - Control	limma	2.85025e-08	2.71062e-07	TRUE	hit	5.86184
247	TUBGCP5	A0A087X1Z1|A0A0G2JPW5|A0A0G2JQX1|A0A0G2JSA7|Q96RT8|Q96RT8-2	Gamma-tubulin complex component OS=Homo sapiens GN=TUBGCP5 PE=1 SV=1|Gamma-tubulin complex component OS=Homo sapiens GN=TUBGCP5 PE=1 SV=1|Gamma-tubulin complex component OS=Homo sapiens GN=TUBGCP5 PE=1 SV=1|Gamma-tubulin complex component OS=Homo sapiens GN=TUBGCP5 PE=1 SV=1|Gamma-tubulin complex component 5 OS=Homo sapiens GN=TUBGCP5 PE=1 SV=1|Isoform 2 of Gamma-tubulin complex component 5 OS=Ho…	1	4	3	10	6.36488	4.17677	22.296	18.4315	2.85124e-08	2.71062e-07	9.85051	0.985518	1	1	WT - Control	limma	2.85124e-08	2.71062e-07	TRUE	hit	6.36488
248	TMX3	Q96JJ7	Protein disulfide-isomerase TMX3 OS=Homo sapiens GN=TMX3 PE=1 SV=2	1	4	3	6	6.68549	4.35549	21.24	18.4268	2.85745e-08	2.71062e-07	9.84838	0.985522	1	1	WT - Control	limma	2.85745e-08	2.71062e-07	TRUE	hit	6.68549
249	TMEM209	Q96SK2|Q96SK2-2	Transmembrane protein 209 OS=Homo sapiens GN=TMEM209 PE=1 SV=2|Isoform 2 of Transmembrane protein 209 OS=Homo sapiens GN=TMEM209	1	4	3	6	6.85242	3.85976	22.8378	18.4238	2.86148e-08	2.71062e-07	9.847	0.985524	1	1	WT - Control	limma	2.86148e-08	2.71062e-07	TRUE	hit	6.85242
250	FADS2	O95864	Fatty acid desaturase 2 OS=Homo sapiens GN=FADS2 PE=1 SV=1	1	4	3	4	6.74386	4.12247	21.6001	18.3101	3.01603e-08	2.84512e-07	9.79551	0.985614	1	1	WT - Control	limma	3.01603e-08	2.84512e-07	TRUE	hit	6.74386
251	ARL8A|ARL8B	A0A087X2J2|Q96BM9|Q9NVJ2|Q9NVJ2-2	ADP-ribosylation factor-like protein 8A OS=Homo sapiens GN=ARL8A PE=1 SV=1|ADP-ribosylation factor-like protein 8A OS=Homo sapiens GN=ARL8A PE=1 SV=1|ADP-ribosylation factor-like protein 8B OS=Homo sapiens GN=ARL8B PE=1 SV=1|Isoform 2 of ADP-ribosylation factor-like protein 8B OS=Homo sapiens GN=ARL8B	1	4	3	2	6.30172	3.60628	21.3143	18.2981	3.03286e-08	2.84913e-07	9.79006	0.985623	1	1	WT - Control	limma	3.03286e-08	2.84913e-07	TRUE	hit	6.30172
252	MAP7D1	Q3KQU3	MAP7 domain-containing protein 1 OS=Homo sapiens GN=MAP7D1 PE=1 SV=1	1	4	3	10	6.56578	3.36091	22.8205	18.2819	3.05577e-08	2.85018e-07	9.78268	0.985636	1	1	WT - Control	limma	3.05577e-08	2.85018e-07	TRUE	hit	6.56578
253	NUP85	J3KT10|Q9BW27|Q9BW27-3	Nuclear pore complex protein Nup85 OS=Homo sapiens GN=NUP85 PE=1 SV=1|Nuclear pore complex protein Nup85 OS=Homo sapiens GN=NUP85 PE=1 SV=1|Isoform 3 of Nuclear pore complex protein Nup85 OS=Homo sapiens GN=NUP85	1	4	3	3	6.42698	3.26694	21.1406	18.2795	3.05916e-08	2.85018e-07	9.78159	0.985638	1	1	WT - Control	limma	3.05916e-08	2.85018e-07	TRUE	hit	6.42698
254	EXOC1	Q9NV70|Q9NV70-2	Exocyst complex component 1 OS=Homo sapiens GN=EXOC1 PE=1 SV=4|Isoform 2 of Exocyst complex component 1 OS=Homo sapiens GN=EXOC1	1	4	3	5	6.21468	3.40483	21.4395	18.2325	3.12677e-08	2.87672e-07	9.76016	0.985674	1	1	WT - Control	limma	3.12677e-08	2.87672e-07	TRUE	hit	6.21468
255	ACOT9	Q9Y305|Q9Y305-2|Q9Y305-3|Q9Y305-4	Acyl-coenzyme A thioesterase 9, mitochondrial OS=Homo sapiens GN=ACOT9 PE=1 SV=2|Isoform 2 of Acyl-coenzyme A thioesterase 9, mitochondrial OS=Homo sapiens GN=ACOT9|Isoform 3 of Acyl-coenzyme A thioesterase 9, mitochondrial OS=Homo sapiens GN=ACOT9|Isoform 4 of Acyl-coenzyme A thioesterase 9, mitochondrial OS=Homo sapiens GN=ACOT9	1	4	3	4	6.58234	3.53647	22.1319	18.2318	3.12787e-08	2.87672e-07	9.75982	0.985675	1	1	WT - Control	limma	3.12787e-08	2.87672e-07	TRUE	hit	6.58234
256	RUFY2	H0YD93|Q8WXA3|Q8WXA3-2|Q8WXA3-3	RUN and FYVE domain-containing protein 2 (Fragment) OS=Homo sapiens GN=RUFY2 PE=1 SV=1|RUN and FYVE domain-containing protein 2 OS=Homo sapiens GN=RUFY2 PE=1 SV=2|Isoform 2 of RUN and FYVE domain-containing protein 2 OS=Homo sapiens GN=RUFY2|Isoform 3 of RUN and FYVE domain-containing protein 2 OS=Homo sapiens GN=RUFY2	1	4	3	5	5.71527	3.507	20.9475	18.2225	3.1414e-08	2.87672e-07	9.75559	0.985682	1	1	WT - Control	limma	3.1414e-08	2.87672e-07	TRUE	hit	5.71527
257	EIF2AK4	Q9P2K8|Q9P2K8-2	eIF-2-alpha kinase GCN2 OS=Homo sapiens GN=EIF2AK4 PE=1 SV=3|Isoform 2 of eIF-2-alpha kinase GCN2 OS=Homo sapiens GN=EIF2AK4	1	4	3	8	5.93075	3.36886	21.6458	18.216	3.1509e-08	2.87672e-07	9.75263	0.985687	1	1	WT - Control	limma	3.1509e-08	2.87672e-07	TRUE	hit	5.93075
258	GEMIN4	I3L2C7|P57678	Gem-associated protein 4 OS=Homo sapiens GN=GEMIN4 PE=1 SV=1|Gem-associated protein 4 OS=Homo sapiens GN=GEMIN4 PE=1 SV=2	1	4	3	8	6.80436	3.53539	23.2523	18.2154	3.15185e-08	2.87672e-07	9.75233	0.985688	1	1	WT - Control	limma	3.15185e-08	2.87672e-07	TRUE	hit	6.80436
259	SMC4	E9PD53|Q9NTJ3	Structural maintenance of chromosomes protein OS=Homo sapiens GN=SMC4 PE=1 SV=1|Structural maintenance of chromosomes protein 4 OS=Homo sapiens GN=SMC4 PE=1 SV=2	1	4	3	20	6.7839	3.18617	24.5173	18.2072	3.16388e-08	2.87672e-07	9.74859	0.985694	1	1	WT - Control	limma	3.16388e-08	2.87672e-07	TRUE	hit	6.7839
260	RTKN	Q9BST9	Rhotekin OS=Homo sapiens GN=RTKN PE=1 SV=2	1	4	3	5	6.34637	3.87081	21.7679	18.1936	3.18402e-08	2.88255e-07	9.74237	0.985705	1	1	WT - Control	limma	3.18402e-08	2.88255e-07	TRUE	hit	6.34637
261	NAV1	A0A0A0MRJ3|Q8NEY1|Q8NEY1-2|Q8NEY1-3|Q8NEY1-4|Q8NEY1-7	Neuron navigator 1 OS=Homo sapiens GN=NAV1 PE=1 SV=1|Neuron navigator 1 OS=Homo sapiens GN=NAV1 PE=1 SV=2|Isoform 2 of Neuron navigator 1 OS=Homo sapiens GN=NAV1|Isoform 3 of Neuron navigator 1 OS=Homo sapiens GN=NAV1|Isoform 4 of Neuron navigator 1 OS=Homo sapiens GN=NAV1|Isoform 7 of Neuron navigator 1 OS=Homo sapiens GN=NAV1	1	4	3	6	6.52331	3.87107	21.3227	18.1858	3.19576e-08	2.88255e-07	9.73876	0.985711	1	1	WT - Control	limma	3.19576e-08	2.88255e-07	TRUE	hit	6.52331
262	ADCK2	Q7Z695	Uncharacterized aarF domain-containing protein kinase 2 OS=Homo sapiens GN=ADCK2 PE=2 SV=1	1	4	3	5	5.94708	3.35671	20.8238	18.1493	3.25068e-08	2.9002e-07	9.72203	0.98574	1	1	WT - Control	limma	3.25068e-08	2.9002e-07	TRUE	hit	5.94708
263	SUPT6H	Q7KZ85	Transcription elongation factor SPT6 OS=Homo sapiens GN=SUPT6H PE=1 SV=2	1	4	3	10	6.46922	4.82919	21.8859	18.1451	3.25707e-08	2.9002e-07	9.72011	0.985743	1	1	WT - Control	limma	3.25707e-08	2.9002e-07	TRUE	hit	6.46922
264	INF2	Q27J81|Q27J81-2	Inverted formin-2 OS=Homo sapiens GN=INF2 PE=1 SV=2|Isoform 2 of Inverted formin-2 OS=Homo sapiens GN=INF2	1	4	3	4	5.81423	3.8483	20.8987	18.1442	3.25853e-08	2.9002e-07	9.71967	0.985744	1	1	WT - Control	limma	3.25853e-08	2.9002e-07	TRUE	hit	5.81423
265	LONP2	Q86WA8	Lon protease homolog 2, peroxisomal OS=Homo sapiens GN=LONP2 PE=1 SV=1	1	4	3	5	6.17172	3.41581	21.6932	18.1389	3.26657e-08	2.9002e-07	9.71725	0.985748	1	1	WT - Control	limma	3.26657e-08	2.9002e-07	TRUE	hit	6.17172
266	TMEM126B	Q8IUX1|Q8IUX1-2|Q8IUX1-3|Q8IUX1-4|Q8IUX1-5	Complex I assembly factor TMEM126B, mitochondrial OS=Homo sapiens GN=TMEM126B PE=1 SV=2|Isoform 2 of Complex I assembly factor TMEM126B, mitochondrial OS=Homo sapiens GN=TMEM126B|Isoform 3 of Complex I assembly factor TMEM126B, mitochondrial OS=Homo sapiens GN=TMEM126B|Isoform 4 of Complex I assembly factor TMEM126B, mitochondrial OS=Homo sapiens GN=TMEM126B|Isoform 5 of Complex I assembly factor…	1	4	3	2	6.42526	3.19784	20.1979	18.114	3.30489e-08	2.92276e-07	9.7058	0.985768	1	1	WT - Control	limma	3.30489e-08	2.92276e-07	TRUE	hit	6.42526
267	TUFM	P49411	Elongation factor Tu, mitochondrial OS=Homo sapiens GN=TUFM PE=1 SV=2	1	4	3	16	7.78326	3.25568	24.1945	18.0266	3.44354e-08	3.03353e-07	9.66542	0.985836	1	1	WT - Control	limma	3.44354e-08	3.03353e-07	TRUE	hit	7.78326
268	NUP188	Q5SRE5	Nucleoporin NUP188 homolog OS=Homo sapiens GN=NUP188 PE=1 SV=1	1	4	3	12	6.84795	5.84644	23.338	18.0098	3.47084e-08	3.04573e-07	9.65765	0.985849	1	1	WT - Control	limma	3.47084e-08	3.04573e-07	TRUE	hit	6.84795
269	DENND4A	A0A0U1RR27|Q7Z401|Q7Z401-2	C-myc promoter-binding protein OS=Homo sapiens GN=DENND4A PE=1 SV=1|C-myc promoter-binding protein OS=Homo sapiens GN=DENND4A PE=1 SV=2|Isoform 2 of C-myc promoter-binding protein OS=Homo sapiens GN=DENND4A	1	4	3	4	5.78496	3.36138	20.793	17.9918	3.50045e-08	3.04894e-07	9.6493	0.985864	1	1	WT - Control	limma	3.50045e-08	3.04894e-07	TRUE	hit	5.78496
270	ESPL1	Q14674	Separin OS=Homo sapiens GN=ESPL1 PE=1 SV=3	1	4	3	8	6.49606	3.04441	22.7575	17.9912	3.50143e-08	3.04894e-07	9.64902	0.985864	1	1	WT - Control	limma	3.50143e-08	3.04894e-07	TRUE	hit	6.49606
271	TIMM23|TIMM23B	O14925|Q5SRD1	Mitochondrial import inner membrane translocase subunit Tim23 OS=Homo sapiens GN=TIMM23 PE=1 SV=1|Putative mitochondrial import inner membrane translocase subunit Tim23B OS=Homo sapiens GN=TIMM23B PE=5 SV=2	1	4	3	3	6.61485	5.80462	21.9168	17.9585	3.55599e-08	3.07622e-07	9.63381	0.98589	1	1	WT - Control	limma	3.55599e-08	3.07622e-07	TRUE	hit	6.61485
272	PIK3C2A	O00443	Phosphatidylinositol 4-phosphate 3-kinase C2 domain-containing subunit alpha OS=Homo sapiens GN=PIK3C2A PE=1 SV=2	1	4	3	5	6.06325	3.79139	21.6568	17.9561	1.46872e-07	6.72989e-07	8.29874	0.985892	1	1	WT - Control	limma	1.46872e-07	6.72989e-07	TRUE	hit	6.06325
273	NOP58	Q9Y2X3	Nucleolar protein 58 OS=Homo sapiens GN=NOP58 PE=1 SV=1	1	4	3	7	6.82369	3.89387	22.7198	17.9561	3.55993e-08	3.07622e-07	9.63272	0.985892	1	1	WT - Control	limma	3.55993e-08	3.07622e-07	TRUE	hit	6.82369
274	COPG2	Q9UBF2	Coatomer subunit gamma-2 OS=Homo sapiens GN=COPG2 PE=1 SV=1	1	4	3	7	6.52071	3.9531	22.5741	17.9392	3.58848e-08	3.08909e-07	9.62487	0.985905	1	1	WT - Control	limma	3.58848e-08	3.08909e-07	TRUE	hit	6.52071
275	NOC2L	Q9Y3T9	Nucleolar complex protein 2 homolog OS=Homo sapiens GN=NOC2L PE=1 SV=4	1	4	3	3	6.13557	3.55421	21.23	17.9035	3.64975e-08	3.12488e-07	9.6082	0.985933	1	1	WT - Control	limma	3.64975e-08	3.12488e-07	TRUE	hit	6.13557
276	SECISBP2L	Q93073|Q93073-2	Selenocysteine insertion sequence-binding protein 2-like OS=Homo sapiens GN=SECISBP2L PE=1 SV=3|Isoform 2 of Selenocysteine insertion sequence-binding protein 2-like OS=Homo sapiens GN=SECISBP2L	1	4	3	3	6.05651	3.37551	21.6102	17.8989	3.65766e-08	3.12488e-07	9.60607	0.985937	1	1	WT - Control	limma	3.65766e-08	3.12488e-07	TRUE	hit	6.05651
277	MCM7	P33993	DNA replication licensing factor MCM7 OS=Homo sapiens GN=MCM7 PE=1 SV=4	1	4	3	18	7.36218	4.54644	24.2974	17.881	3.68885e-08	3.13844e-07	9.59771	0.985951	1	1	WT - Control	limma	3.68885e-08	3.13844e-07	TRUE	hit	7.36218
278	HAUS5	O94927	HAUS augmin-like complex subunit 5 OS=Homo sapiens GN=HAUS5 PE=1 SV=2	1	4	3	6	6.61115	3.21208	22.2909	17.8739	3.70126e-08	3.13844e-07	9.5944	0.985956	1	1	WT - Control	limma	3.70126e-08	3.13844e-07	TRUE	hit	6.61115
279	CDC42BPA	A0A0A0MRJ0|Q5VT25|Q5VT25-2|Q5VT25-3|Q5VT25-4|Q5VT25-5|Q5VT25-6	Serine/threonine-protein kinase MRCK alpha OS=Homo sapiens GN=CDC42BPA PE=1 SV=1|Serine/threonine-protein kinase MRCK alpha OS=Homo sapiens GN=CDC42BPA PE=1 SV=1|Isoform 2 of Serine/threonine-protein kinase MRCK alpha OS=Homo sapiens GN=CDC42BPA|Isoform 3 of Serine/threonine-protein kinase MRCK alpha OS=Homo sapiens GN=CDC42BPA|Isoform 4 of Serine/threonine-protein kinase MRCK alpha OS=Homo sapie…	1	4	3	5	5.8216	3.41823	21.2362	17.86	3.72595e-08	3.14759e-07	9.58785	0.985967	1	1	WT - Control	limma	3.72595e-08	3.14759e-07	TRUE	hit	5.8216
280	COX4I1	H3BN72|H3BNV9|P13073	Cytochrome c oxidase subunit 4 isoform 1, mitochondrial OS=Homo sapiens GN=COX4I1 PE=1 SV=1|Cytochrome c oxidase subunit 4 isoform 1, mitochondrial OS=Homo sapiens GN=COX4I1 PE=1 SV=1|Cytochrome c oxidase subunit 4 isoform 1, mitochondrial OS=Homo sapiens GN=COX4I1 PE=1 SV=1	1	4	3	3	6.05138	3.30836	21.3163	17.8517	3.74054e-08	3.14817e-07	9.584	0.985974	1	1	WT - Control	limma	3.74054e-08	3.14817e-07	TRUE	hit	6.05138
281	KNTC1	P50748	Kinetochore-associated protein 1 OS=Homo sapiens GN=KNTC1 PE=1 SV=1	1	4	3	15	6.35473	4.16656	23.4714	17.8299	3.77953e-08	3.1692e-07	9.57378	0.985991	1	1	WT - Control	limma	3.77953e-08	3.1692e-07	TRUE	hit	6.35473
282	TTC37	Q6PGP7	Tetratricopeptide repeat protein 37 OS=Homo sapiens GN=TTC37 PE=1 SV=1	1	4	3	13	6.67018	4.52317	23.8654	17.8096	3.81623e-08	3.18288e-07	9.56426	0.986007	1	1	WT - Control	limma	3.81623e-08	3.18288e-07	TRUE	hit	6.67018
283	HSDL1	Q3SXM5	Inactive hydroxysteroid dehydrogenase-like protein 1 OS=Homo sapiens GN=HSDL1 PE=1 SV=3	1	4	3	4	6.07331	3.58506	21.1944	17.8054	3.82395e-08	3.18288e-07	9.56226	0.98601	1	1	WT - Control	limma	3.82395e-08	3.18288e-07	TRUE	hit	6.07331
284	CEBPZOS	A8MTT3	Protein CEBPZOS OS=Homo sapiens GN=CEBPZOS PE=1 SV=2	1	4	3	2	6.38865	4.19208	21.6557	17.8038	1.5661e-07	6.97964e-07	8.2379	0.986011	1	1	WT - Control	limma	1.5661e-07	6.97964e-07	TRUE	hit	6.38865
285	ZNHIT6	Q9NWK9|Q9NWK9-2	Box C/D snoRNA protein 1 OS=Homo sapiens GN=ZNHIT6 PE=1 SV=1|Isoform 2 of Box C/D snoRNA protein 1 OS=Homo sapiens GN=ZNHIT6	1	4	3	6	6.36865	3.82921	22.3294	17.7676	3.89356e-08	3.21487e-07	9.54448	0.98604	1	1	WT - Control	limma	3.89356e-08	3.21487e-07	TRUE	hit	6.36865
286	PHKA1	A6NMN0|P46020|P46020-2	Phosphorylase b kinase regulatory subunit alpha, skeletal muscle isoform OS=Homo sapiens GN=PHKA1 PE=1 SV=1|Phosphorylase b kinase regulatory subunit alpha, skeletal muscle isoform OS=Homo sapiens GN=PHKA1 PE=1 SV=2|Isoform 2 of Phosphorylase b kinase regulatory subunit alpha, skeletal muscle isoform OS=Homo sapiens GN=PHKA1	1	4	3	4	6.09817	4.31821	21.7609	17.763	3.90208e-08	3.21487e-07	9.54232	0.986043	1	1	WT - Control	limma	3.90208e-08	3.21487e-07	TRUE	hit	6.09817
287	TCAF1	Q9Y4C2|Q9Y4C2-2	TRPM8 channel-associated factor 1 OS=Homo sapiens GN=TCAF1 PE=1 SV=3|Isoform 2 of TRPM8 channel-associated factor 1 OS=Homo sapiens GN=TCAF1	1	4	3	10	6.56815	4.48967	23.4758	17.7597	3.90816e-08	3.21487e-07	9.54079	0.986046	1	1	WT - Control	limma	3.90816e-08	3.21487e-07	TRUE	hit	6.56815
288	MDN1	Q9NU22	Midasin OS=Homo sapiens GN=MDN1 PE=1 SV=2	1	4	3	36	6.60256	3.66817	24.5808	17.7539	3.91918e-08	3.21487e-07	9.53801	0.986051	1	1	WT - Control	limma	3.91918e-08	3.21487e-07	TRUE	hit	6.60256
289	HOOK1	Q9UJC3|Q9UJC3-2	Protein Hook homolog 1 OS=Homo sapiens GN=HOOK1 PE=1 SV=2|Isoform 2 of Protein Hook homolog 1 OS=Homo sapiens GN=HOOK1	1	4	3	6	6.22278	3.07359	22.0998	17.7423	3.94088e-08	3.21983e-07	9.53256	0.98606	1	1	WT - Control	limma	3.94088e-08	3.21983e-07	TRUE	hit	6.22278
290	MYO10	A0A0A0MQX1|Q9HD67	Unconventional myosin-X OS=Homo sapiens GN=MYO10 PE=1 SV=1|Unconventional myosin-X OS=Homo sapiens GN=MYO10 PE=1 SV=3	1	4	3	8	6.1468	3.51764	21.7432	17.7355	3.95368e-08	3.21983e-07	9.52936	0.986065	1	1	WT - Control	limma	3.95368e-08	3.21983e-07	TRUE	hit	6.1468
291	IARS	P41252	Isoleucine--tRNA ligase, cytoplasmic OS=Homo sapiens GN=IARS PE=1 SV=2	1	4	3	19	7.0164	2.97519	24.2335	17.7265	3.97077e-08	3.22216e-07	9.52511	0.986072	1	1	WT - Control	limma	3.97077e-08	3.22216e-07	TRUE	hit	7.0164
292	MARS	P56192	Methionine--tRNA ligase, cytoplasmic OS=Homo sapiens GN=MARS PE=1 SV=2	1	4	3	13	7.025	2.9441	23.9007	17.6818	4.05677e-08	3.26909e-07	9.50396	0.986107	1	1	WT - Control	limma	4.05677e-08	3.26909e-07	TRUE	hit	7.025
293	ILVBL	A1L0T0	Acetolactate synthase-like protein OS=Homo sapiens GN=ILVBL PE=1 SV=2	1	4	3	9	7.33172	3.24723	23.3468	17.6814	4.05748e-08	3.26909e-07	9.50379	0.986107	1	1	WT - Control	limma	4.05748e-08	3.26909e-07	TRUE	hit	7.33172
294	ARF4	P18085	ADP-ribosylation factor 4 OS=Homo sapiens GN=ARF4 PE=1 SV=3	1	4	3	2	6.80205	4.48707	21.6783	17.6789	1.65135e-07	7.29975e-07	8.09429	0.986109	1	1	WT - Control	limma	1.65135e-07	7.29975e-07	TRUE	hit	6.80205
295	EVI5	O60447|O60447-2	Ecotropic viral integration site 5 protein homolog OS=Homo sapiens GN=EVI5 PE=1 SV=3|Isoform 2 of Ecotropic viral integration site 5 protein homolog OS=Homo sapiens GN=EVI5	1	4	3	4	5.83358	3.15993	20.584	17.6684	4.08295e-08	3.27794e-07	9.49761	0.986118	1	1	WT - Control	limma	4.08295e-08	3.27794e-07	TRUE	hit	5.83358
296	CTPS1	P17812	CTP synthase 1 OS=Homo sapiens GN=CTPS1 PE=1 SV=2	1	4	3	10	7.25591	3.27486	22.7925	17.6409	4.13732e-08	3.2982e-07	9.48455	0.986139	1	1	WT - Control	limma	4.13732e-08	3.2982e-07	TRUE	hit	7.25591
297	VPS51	Q9UID3	Vacuolar protein sorting-associated protein 51 homolog OS=Homo sapiens GN=VPS51 PE=1 SV=2	1	4	3	2	6.53716	3.93363	20.6658	17.6179	4.18337e-08	3.32321e-07	9.47361	0.986157	1	1	WT - Control	limma	4.18337e-08	3.32321e-07	TRUE	hit	6.53716
298	CCZ1B|CCZ1	P86790|P86791	Vacuolar fusion protein CCZ1 homolog B OS=Homo sapiens GN=CCZ1B PE=1 SV=1|Vacuolar fusion protein CCZ1 homolog OS=Homo sapiens GN=CCZ1 PE=1 SV=1	1	4	3	2	5.99698	3.54108	20.9576	17.6035	4.21231e-08	3.3345e-07	9.4668	0.986169	1	1	WT - Control	limma	4.21231e-08	3.3345e-07	TRUE	hit	5.99698
299	PTPMT1	Q8WUK0	Phosphatidylglycerophosphatase and protein-tyrosine phosphatase 1 OS=Homo sapiens GN=PTPMT1 PE=1 SV=1	1	4	3	3	6.34343	3.93406	21.1603	17.5817	4.25699e-08	3.35812e-07	9.45637	0.986186	1	1	WT - Control	limma	4.25699e-08	3.35812e-07	TRUE	hit	6.34343
300	DDB1	Q16531	DNA damage-binding protein 1 OS=Homo sapiens GN=DDB1 PE=1 SV=1	1	4	3	10	6.76013	4.67536	23.0423	17.5661	4.28915e-08	3.36932e-07	9.44893	0.986198	1	1	WT - Control	limma	4.28915e-08	3.36932e-07	TRUE	hit	6.76013
301	VARS2	A0A0A0MTG1|A0A0G2JIA5|A0A140T8Y0|A0A140TA35|A0A140TA36|A0A140TA40|A0A140TA45|Q5ST30|Q5ST30-4	Valine--tRNA ligase, mitochondrial OS=Homo sapiens GN=VARS2 PE=1 SV=1|Valine--tRNA ligase, mitochondrial OS=Homo sapiens GN=VARS2 PE=1 SV=1|Valine--tRNA ligase, mitochondrial OS=Homo sapiens GN=VARS2 PE=1 SV=1|Valine--tRNA ligase, mitochondrial OS=Homo sapiens GN=VARS2 PE=1 SV=1|Valine--tRNA ligase, mitochondrial OS=Homo sapiens GN=VARS2 PE=1 SV=1|Valine--tRNA ligase, mitochondrial OS=Homo sapien…	1	4	3	7	6.47296	3.59069	22.2193	17.5604	4.30094e-08	3.36932e-07	9.44622	0.986203	1	1	WT - Control	limma	4.30094e-08	3.36932e-07	TRUE	hit	6.47296
302	DSP	P15924	Desmoplakin OS=Homo sapiens GN=DSP PE=1 SV=3	1	4	3	25	6.45847	2.94933	24.3006	17.5439	4.33533e-08	3.37534e-07	9.43835	0.986215	1	1	WT - Control	limma	4.33533e-08	3.37534e-07	TRUE	hit	6.45847
303	PLOD3	O60568	Procollagen-lysine,2-oxoglutarate 5-dioxygenase 3 OS=Homo sapiens GN=PLOD3 PE=1 SV=1	1	4	3	6	6.29485	4.16965	22.4829	17.5406	4.34225e-08	3.37534e-07	9.43677	0.986218	1	1	WT - Control	limma	4.34225e-08	3.37534e-07	TRUE	hit	6.29485
304	UCK2	Q9BZX2	Uridine-cytidine kinase 2 OS=Homo sapiens GN=UCK2 PE=1 SV=1	1	4	3	3	6.24916	3.17262	21.06	17.5282	4.36827e-08	3.37534e-07	9.43086	0.986228	1	1	WT - Control	limma	4.36827e-08	3.37534e-07	TRUE	hit	6.24916
305	HSPA8	E9PN89|P11142	Heat shock cognate 71 kDa protein (Fragment) OS=Homo sapiens GN=HSPA8 PE=1 SV=1|Heat shock cognate 71 kDa protein OS=Homo sapiens GN=HSPA8 PE=1 SV=1	1	4	3	20	7.90704	3.07342	25.6559	17.4865	4.45739e-08	3.43249e-07	9.41088	0.986261	1	1	WT - Control	limma	4.45739e-08	3.43249e-07	TRUE	hit	7.90704
306	RAD51C	J3QKK3|O43502	DNA repair protein RAD51 homolog 3 OS=Homo sapiens GN=RAD51C PE=1 SV=1|DNA repair protein RAD51 homolog 3 OS=Homo sapiens GN=RAD51C PE=1 SV=1	1	4	3	3	5.99057	3.20378	20.6826	17.4692	4.49505e-08	3.44976e-07	9.40255	0.986274	1	1	WT - Control	limma	4.49505e-08	3.44976e-07	TRUE	hit	5.99057
307	ACACA	Q13085|Q13085-4	Acetyl-CoA carboxylase 1 OS=Homo sapiens GN=ACACA PE=1 SV=2|Isoform 4 of Acetyl-CoA carboxylase 1 OS=Homo sapiens GN=ACACA	1	4	3	14	6.43484	3.03966	22.8326	17.4602	4.51469e-08	3.45313e-07	9.39824	0.986281	1	1	WT - Control	limma	4.51469e-08	3.45313e-07	TRUE	hit	6.43484
308	SAMM50	Q9Y512	Sorting and assembly machinery component 50 homolog OS=Homo sapiens GN=SAMM50 PE=1 SV=3	1	4	3	4	5.81788	3.08845	21.0547	17.4503	4.53644e-08	3.45808e-07	9.39348	0.986289	1	1	WT - Control	limma	4.53644e-08	3.45808e-07	TRUE	hit	5.81788
309	RCOR1	J3KN32|Q9UKL0	REST corepressor 1 OS=Homo sapiens GN=RCOR1 PE=1 SV=1|REST corepressor 1 OS=Homo sapiens GN=RCOR1 PE=1 SV=1	1	4	3	4	6.43332	3.88412	22.701	17.4093	4.62778e-08	3.51587e-07	9.37374	0.986321	1	1	WT - Control	limma	4.62778e-08	3.51587e-07	TRUE	hit	6.43332
310	LTN1	O94822|O94822-3	E3 ubiquitin-protein ligase listerin OS=Homo sapiens GN=LTN1 PE=1 SV=6|Isoform 3 of E3 ubiquitin-protein ligase listerin OS=Homo sapiens GN=LTN1	1	4	3	11	6.60638	3.80038	22.8332	17.394	4.66235e-08	3.5217e-07	9.36637	0.986333	1	1	WT - Control	limma	4.66235e-08	3.5217e-07	TRUE	hit	6.60638
311	UGDH	O60701|O60701-3	UDP-glucose 6-dehydrogenase OS=Homo sapiens GN=UGDH PE=1 SV=1|Isoform 3 of UDP-glucose 6-dehydrogenase OS=Homo sapiens GN=UGDH	1	4	3	3	6.28987	3.43772	22.1782	17.3781	4.69877e-08	3.5217e-07	9.35866	0.986346	1	1	WT - Control	limma	4.69877e-08	3.5217e-07	TRUE	hit	6.28987
312	STX17	P56962	Syntaxin-17 OS=Homo sapiens GN=STX17 PE=1 SV=2	1	4	3	5	6.21136	4.34582	22.121	17.3751	1.88156e-07	7.96333e-07	7.97738	0.986348	1	1	WT - Control	limma	1.88156e-07	7.96333e-07	TRUE	hit	6.21136
313	RAB39A	Q14964	Ras-related protein Rab-39A OS=Homo sapiens GN=RAB39A PE=1 SV=2	1	4	3	3	6.40398	3.46465	21.2793	17.374	4.70809e-08	3.5217e-07	9.3567	0.986349	1	1	WT - Control	limma	4.70809e-08	3.5217e-07	TRUE	hit	6.40398
314	POMGNT1	Q8WZA1|Q8WZA1-2	Protein O-linked-mannose beta-1,2-N-acetylglucosaminyltransferase 1 OS=Homo sapiens GN=POMGNT1 PE=1 SV=2|Isoform 2 of Protein O-linked-mannose beta-1,2-N-acetylglucosaminyltransferase 1 OS=Homo sapiens GN=POMGNT1	1	4	3	3	5.79763	3.71179	20.7327	17.3718	4.71323e-08	3.5217e-07	9.35562	0.986351	1	1	WT - Control	limma	4.71323e-08	3.5217e-07	TRUE	hit	5.79763
315	ATP5A1	P25705	ATP synthase subunit alpha, mitochondrial OS=Homo sapiens GN=ATP5A1 PE=1 SV=1	1	4	3	21	7.83696	4.64069	25.3004	17.357	4.74735e-08	3.53244e-07	9.34847	0.986362	1	1	WT - Control	limma	4.74735e-08	3.53244e-07	TRUE	hit	7.83696
316	KSR1	Q8IVT5|Q8IVT5-2	Kinase suppressor of Ras 1 OS=Homo sapiens GN=KSR1 PE=1 SV=3|Isoform 2 of Kinase suppressor of Ras 1 OS=Homo sapiens GN=KSR1	1	4	3	5	6.11871	3.05441	21.8962	17.3492	4.7654e-08	3.53244e-07	9.34471	0.986368	1	1	WT - Control	limma	4.7654e-08	3.53244e-07	TRUE	hit	6.11871
317	SREBF2	Q12772	Sterol regulatory element-binding protein 2 OS=Homo sapiens GN=SREBF2 PE=1 SV=2	1	4	3	4	6.2103	3.99557	21.415	17.3454	4.77441e-08	3.53244e-07	9.34283	0.986371	1	1	WT - Control	limma	4.77441e-08	3.53244e-07	TRUE	hit	6.2103
318	IPO4	Q8TEX9|Q8TEX9-2	Importin-4 OS=Homo sapiens GN=IPO4 PE=1 SV=2|Isoform 2 of Importin-4 OS=Homo sapiens GN=IPO4	1	4	3	4	6.02017	3.00537	21.3322	17.3258	4.8203e-08	3.55477e-07	9.33335	0.986387	1	1	WT - Control	limma	4.8203e-08	3.55477e-07	TRUE	hit	6.02017
319	DROSHA	Q9NRR4|Q9NRR4-2|Q9NRR4-4	Ribonuclease 3 OS=Homo sapiens GN=DROSHA PE=1 SV=2|Isoform 2 of Ribonuclease 3 OS=Homo sapiens GN=DROSHA|Isoform 4 of Ribonuclease 3 OS=Homo sapiens GN=DROSHA	1	4	3	3	6.26677	3.08928	21.135	17.3152	4.84532e-08	3.56092e-07	9.32822	0.986395	1	1	WT - Control	limma	4.84532e-08	3.56092e-07	TRUE	hit	6.26677
320	PSMA2	A0A024RA52|P25787	Proteasome subunit alpha type OS=Homo sapiens GN=PSMA2 PE=1 SV=1|Proteasome subunit alpha type-2 OS=Homo sapiens GN=PSMA2 PE=1 SV=2	1	4	3	3	6.29228	3.35198	21.7902	17.305	4.86957e-08	3.56092e-07	9.32327	0.986403	1	1	WT - Control	limma	4.86957e-08	3.56092e-07	TRUE	hit	6.29228
321	EMD	P50402	Emerin OS=Homo sapiens GN=EMD PE=1 SV=1	1	4	3	9	7.34128	3.5565	23.3663	17.3024	4.87582e-08	3.56092e-07	9.322	0.986405	1	1	WT - Control	limma	4.87582e-08	3.56092e-07	TRUE	hit	7.34128
322	NDUFA13	Q9P0J0|Q9P0J0-2	NADH dehydrogenase [ubiquinone] 1 alpha subcomplex subunit 13 OS=Homo sapiens GN=NDUFA13 PE=1 SV=3|Isoform 2 of NADH dehydrogenase [ubiquinone] 1 alpha subcomplex subunit 13 OS=Homo sapiens GN=NDUFA13	1	4	3	3	6.38785	3.80114	20.7563	17.2832	4.92197e-08	3.58307e-07	9.31265	0.98642	1	1	WT - Control	limma	4.92197e-08	3.58307e-07	TRUE	hit	6.38785
323	MAN1B1	H0YG20	alpha-1,2-Mannosidase OS=Homo sapiens GN=MAN1B1 PE=1 SV=2	1	4	3	3	6.34592	4.19624	21.5939	17.2595	1.97844e-07	8.21006e-07	8.01509	0.986439	1	1	WT - Control	limma	1.97844e-07	8.21006e-07	TRUE	hit	6.34592
324	SKIV2L	Q15477	Helicase SKI2W OS=Homo sapiens GN=SKIV2L PE=1 SV=3	1	4	3	11	6.7375	4.82443	22.8953	17.2401	5.02725e-08	3.63153e-07	9.29165	0.986454	1	1	WT - Control	limma	5.02725e-08	3.63153e-07	TRUE	hit	6.7375
325	KIAA1524	A0A087X211|Q8TCG1	Protein CIP2A OS=Homo sapiens GN=KIAA1524 PE=1 SV=1|Protein CIP2A OS=Homo sapiens GN=KIAA1524 PE=1 SV=2	1	4	3	4	5.97303	2.97863	21.2367	17.2377	5.03319e-08	3.63153e-07	9.29048	0.986456	1	1	WT - Control	limma	5.03319e-08	3.63153e-07	TRUE	hit	5.97303
326	WLS	Q5T9L3|Q5T9L3-2	Protein wntless homolog OS=Homo sapiens GN=WLS PE=1 SV=2|Isoform 2 of Protein wntless homolog OS=Homo sapiens GN=WLS	1	4	3	2	6.37829	3.99297	20.5155	17.2352	1.99957e-07	8.23883e-07	8.00491	0.986458	1	1	WT - Control	limma	1.99957e-07	8.23883e-07	TRUE	hit	6.37829
327	WDR62	O43379|O43379-4	WD repeat-containing protein 62 OS=Homo sapiens GN=WDR62 PE=1 SV=4|Isoform 4 of WD repeat-containing protein 62 OS=Homo sapiens GN=WDR62	1	4	3	11	6.49311	3.04076	22.1621	17.2327	5.0454e-08	3.63153e-07	9.28808	0.98646	1	1	WT - Control	limma	5.0454e-08	3.63153e-07	TRUE	hit	6.49311
328	ZFP82	Q8N141	Zinc finger protein 82 homolog OS=Homo sapiens GN=ZFP82 PE=2 SV=1	1	4	3	3	6.09481	3.55233	21.9217	17.2298	5.05271e-08	3.63153e-07	9.28664	0.986462	1	1	WT - Control	limma	5.05271e-08	3.63153e-07	TRUE	hit	6.09481
329	FASTKD3	Q14CZ7	FAST kinase domain-containing protein 3, mitochondrial OS=Homo sapiens GN=FASTKD3 PE=1 SV=2	1	4	3	5	6.4589	4.27264	21.8677	17.1925	5.14632e-08	3.67589e-07	9.26842	0.986492	1	1	WT - Control	limma	5.14632e-08	3.67589e-07	TRUE	hit	6.4589
330	ANKHD1	Q8IWZ3|Q8IWZ3-4|Q8IWZ3-6	Ankyrin repeat and KH domain-containing protein 1 OS=Homo sapiens GN=ANKHD1 PE=1 SV=1|Isoform 4 of Ankyrin repeat and KH domain-containing protein 1 OS=Homo sapiens GN=ANKHD1|Isoform 6 of Ankyrin repeat and KH domain-containing protein 1 OS=Homo sapiens GN=ANKHD1	1	4	3	7	6.17079	3.18884	22.4158	17.1923	5.14689e-08	3.67589e-07	9.2683	0.986492	1	1	WT - Control	limma	5.14689e-08	3.67589e-07	TRUE	hit	6.17079
331	PROS1	P07225	Vitamin K-dependent protein S OS=Homo sapiens GN=PROS1 PE=1 SV=1	1	4	3	3	6.061	4.18395	21.6449	17.1829	5.17077e-08	3.67687e-07	9.26371	0.986499	1	1	WT - Control	limma	5.17077e-08	3.67687e-07	TRUE	hit	6.061
332	ZKSCAN1	E9PC66|P17029	Zinc finger protein with KRAB and SCAN domains 1 OS=Homo sapiens GN=ZKSCAN1 PE=1 SV=1|Zinc finger protein with KRAB and SCAN domains 1 OS=Homo sapiens GN=ZKSCAN1 PE=1 SV=3	1	4	3	5	6.57076	4.01655	22.0346	17.1772	2.05088e-07	8.36611e-07	7.98063	0.986504	1	1	WT - Control	limma	2.05088e-07	8.36611e-07	TRUE	hit	6.57076
333	RNASEL	Q05823|Q05823-2	2-5A-dependent ribonuclease OS=Homo sapiens GN=RNASEL PE=1 SV=2|Isoform 2 of 2-5A-dependent ribonuclease OS=Homo sapiens GN=RNASEL	1	4	3	2	6.23401	3.1424	20.4419	17.1769	5.18604e-08	3.67687e-07	9.26078	0.986504	1	1	WT - Control	limma	5.18604e-08	3.67687e-07	TRUE	hit	6.23401
334	NAGLU	P54802	Alpha-N-acetylglucosaminidase OS=Homo sapiens GN=NAGLU PE=1 SV=2	1	4	3	2	6.76692	3.82773	20.7107	17.1711	5.20096e-08	3.67687e-07	9.25793	0.986508	1	1	WT - Control	limma	5.20096e-08	3.67687e-07	TRUE	hit	6.76692
335	CNP	P09543|P09543-2	2',3'-cyclic-nucleotide 3'-phosphodiesterase OS=Homo sapiens GN=CNP PE=1 SV=2|Isoform CNPI of 2',3'-cyclic-nucleotide 3'-phosphodiesterase OS=Homo sapiens GN=CNP	1	4	3	10	7.14946	4.59326	23.4916	17.1663	5.21322e-08	3.67687e-07	9.25559	0.986512	1	1	WT - Control	limma	5.21322e-08	3.67687e-07	TRUE	hit	7.14946
336	INTS1	Q8N201	Integrator complex subunit 1 OS=Homo sapiens GN=INTS1 PE=1 SV=2	1	4	3	10	6.51114	3.48916	22.3363	17.1416	5.27712e-08	3.71038e-07	9.24348	0.986531	1	1	WT - Control	limma	5.27712e-08	3.71038e-07	TRUE	hit	6.51114
337	EPRS	P07814	Bifunctional glutamate/proline--tRNA ligase OS=Homo sapiens GN=EPRS PE=1 SV=5	1	4	3	16	6.92874	3.15323	24.3196	17.1146	5.34799e-08	3.74856e-07	9.23023	0.986553	1	1	WT - Control	limma	5.34799e-08	3.74856e-07	TRUE	hit	6.92874
338	SLC39A14	Q15043|Q15043-2|Q15043-3	Zinc transporter ZIP14 OS=Homo sapiens GN=SLC39A14 PE=1 SV=3|Isoform 2 of Zinc transporter ZIP14 OS=Homo sapiens GN=SLC39A14|Isoform 3 of Zinc transporter ZIP14 OS=Homo sapiens GN=SLC39A14	1	4	3	2	6.30746	3.22722	21.0824	17.0675	5.47441e-08	3.82533e-07	9.207	0.98659	1	1	WT - Control	limma	5.47441e-08	3.82533e-07	TRUE	hit	6.30746
339	TRRAP	H0Y4W2|Q9Y4A5|Q9Y4A5-2	Transformation/transcription domain-associated protein (Fragment) OS=Homo sapiens GN=TRRAP PE=1 SV=1|Transformation/transcription domain-associated protein OS=Homo sapiens GN=TRRAP PE=1 SV=3|Isoform 2 of Transformation/transcription domain-associated protein OS=Homo sapiens GN=TRRAP	1	4	3	10	6.13761	3.04561	22.5613	17.0611	5.49174e-08	3.82563e-07	9.20386	0.986595	1	1	WT - Control	limma	5.49174e-08	3.82563e-07	TRUE	hit	6.13761
340	GCDH	Q92947	Glutaryl-CoA dehydrogenase, mitochondrial OS=Homo sapiens GN=GCDH PE=1 SV=1	1	4	3	6	6.5947	4.50917	22.4643	17.0529	5.51422e-08	3.82765e-07	9.19979	0.986601	1	1	WT - Control	limma	5.51422e-08	3.82765e-07	TRUE	hit	6.5947
341	PSMD3	O43242	26S proteasome non-ATPase regulatory subunit 3 OS=Homo sapiens GN=PSMD3 PE=1 SV=2	1	4	3	14	7.15112	3.00825	23.859	17.0477	5.52844e-08	3.82765e-07	9.19723	0.986605	1	1	WT - Control	limma	5.52844e-08	3.82765e-07	TRUE	hit	7.15112
342	SLC16A1	P53985	Monocarboxylate transporter 1 OS=Homo sapiens GN=SLC16A1 PE=1 SV=3	1	4	3	5	6.73497	4.61048	22.5947	17.0399	5.5499e-08	3.83078e-07	9.19338	0.986611	1	1	WT - Control	limma	5.5499e-08	3.83078e-07	TRUE	hit	6.73497
343	ABHD17C	Q6PCB6	Protein ABHD17C OS=Homo sapiens GN=ABHD17C PE=2 SV=2	1	4	3	2	5.55264	3.57321	20.6574	17.0181	5.61051e-08	3.86085e-07	9.18257	0.986629	1	1	WT - Control	limma	5.61051e-08	3.86085e-07	TRUE	hit	5.55264
344	ZMYM3	Q14202-2	Isoform 2 of Zinc finger MYM-type protein 3 OS=Homo sapiens GN=ZMYM3	1	4	3	9	6.7467	5.10343	22.7341	16.9938	5.67882e-08	3.882e-07	9.17053	0.986648	1	1	WT - Control	limma	5.67882e-08	3.882e-07	TRUE	hit	6.7467
345	GARS	P41250	Glycine--tRNA ligase OS=Homo sapiens GN=GARS PE=1 SV=3	1	4	3	9	6.56612	2.89538	23.6662	16.9886	5.69335e-08	3.882e-07	9.16799	0.986652	1	1	WT - Control	limma	5.69335e-08	3.882e-07	TRUE	hit	6.56612
346	PHGDH	O43175	D-3-phosphoglycerate dehydrogenase OS=Homo sapiens GN=PHGDH PE=1 SV=4	1	4	3	12	7.62266	4.31969	23.9649	16.9876	5.6963e-08	3.882e-07	9.16747	0.986653	1	1	WT - Control	limma	5.6963e-08	3.882e-07	TRUE	hit	7.62266
347	ZNF507	B9EGE7|Q8TCN5	ZNF507 protein OS=Homo sapiens GN=ZNF507 PE=1 SV=1|Zinc finger protein 507 OS=Homo sapiens GN=ZNF507 PE=1 SV=2	1	4	3	8	6.25818	3.4885	21.4552	16.9828	5.70983e-08	3.882e-07	9.16511	0.986656	1	1	WT - Control	limma	5.70983e-08	3.882e-07	TRUE	hit	6.25818
348	PLXNA3	P51805	Plexin-A3 OS=Homo sapiens GN=PLXNA3 PE=1 SV=2	1	4	3	8	6.41521	3.9336	22.4486	16.9777	2.23918e-07	8.74851e-07	7.89625	0.98666	1	1	WT - Control	limma	2.23918e-07	8.74851e-07	TRUE	hit	6.41521
349	XPO5	Q9HAV4	Exportin-5 OS=Homo sapiens GN=XPO5 PE=1 SV=1	1	4	3	9	6.37651	3.72817	22.352	16.9763	5.7285e-08	3.88303e-07	9.16186	0.986661	1	1	WT - Control	limma	5.7285e-08	3.88303e-07	TRUE	hit	6.37651
350	AGPAT2	O15120	1-acyl-sn-glycerol-3-phosphate acyltransferase beta OS=Homo sapiens GN=AGPAT2 PE=1 SV=1	1	4	3	3	6.79078	4.86855	21.8458	16.9551	2.26176e-07	8.79831e-07	7.81117	0.986678	1	1	WT - Control	limma	2.26176e-07	8.79831e-07	TRUE	hit	6.79078
351	EVI5L	Q96CN4|Q96CN4-2	EVI5-like protein OS=Homo sapiens GN=EVI5L PE=1 SV=1|Isoform 2 of EVI5-like protein OS=Homo sapiens GN=EVI5L	1	4	3	8	6.44469	3.03005	22.4505	16.9391	5.8359e-08	3.94402e-07	9.14336	0.986691	1	1	WT - Control	limma	5.8359e-08	3.94402e-07	TRUE	hit	6.44469
352	RPS18	P62269	40S ribosomal protein S18 OS=Homo sapiens GN=RPS18 PE=1 SV=3	1	4	3	7	7.13574	3.13836	23.2253	16.9216	5.88716e-08	3.96682e-07	9.13465	0.986704	1	1	WT - Control	limma	5.88716e-08	3.96682e-07	TRUE	hit	7.13574
353	MRPL20	Q9BYC9	39S ribosomal protein L20, mitochondrial OS=Homo sapiens GN=MRPL20 PE=1 SV=1	1	4	3	3	6.3401	2.90005	21.5895	16.9132	5.91201e-08	3.97175e-07	9.13046	0.986711	1	1	WT - Control	limma	5.91201e-08	3.97175e-07	TRUE	hit	6.3401
354	NDUFA6	A0A0C4DGS0|P56556|R4GN43	NADH dehydrogenase [ubiquinone] 1 alpha subcomplex subunit 6 OS=Homo sapiens GN=NDUFA6 PE=1 SV=1|NADH dehydrogenase [ubiquinone] 1 alpha subcomplex subunit 6 OS=Homo sapiens GN=NDUFA6 PE=1 SV=3|NADH dehydrogenase [ubiquinone] 1 alpha subcomplex subunit 6 OS=Homo sapiens GN=NDUFA6 PE=1 SV=1	1	4	3	2	6.82781	4.70286	22.0421	16.8958	2.32203e-07	8.92544e-07	7.86127	0.986725	1	1	WT - Control	limma	2.32203e-07	8.92544e-07	TRUE	hit	6.82781
355	MSH2	P43246	DNA mismatch repair protein Msh2 OS=Homo sapiens GN=MSH2 PE=1 SV=1	1	4	3	16	6.95099	3.52185	23.901	16.8786	6.01541e-08	4.02925e-07	9.11318	0.986738	1	1	WT - Control	limma	6.01541e-08	4.02925e-07	TRUE	hit	6.95099
356	RFC3	P40938	Replication factor C subunit 3 OS=Homo sapiens GN=RFC3 PE=1 SV=2	1	4	3	7	6.63275	3.3096	21.2654	16.8639	6.05979e-08	4.04701e-07	9.10585	0.98675	1	1	WT - Control	limma	6.05979e-08	4.04701e-07	TRUE	hit	6.63275
357	IDH3G	P51553	Isocitrate dehydrogenase [NAD] subunit gamma, mitochondrial OS=Homo sapiens GN=IDH3G PE=1 SV=1	1	4	3	2	6.44736	3.14769	20.6535	16.8545	6.08831e-08	4.0541e-07	9.10117	0.986757	1	1	WT - Control	limma	6.08831e-08	4.0541e-07	TRUE	hit	6.44736
358	SEC16A	J3KNL6	Protein transport protein Sec16A OS=Homo sapiens GN=SEC16A PE=1 SV=1	1	4	3	15	6.79783	3.43749	22.9011	16.8342	6.15087e-08	4.08375e-07	9.09098	0.986773	1	1	WT - Control	limma	6.15087e-08	4.08375e-07	TRUE	hit	6.79783
359	TP73	O15350|O15350-11|O15350-8	Tumor protein p73 OS=Homo sapiens GN=TP73 PE=1 SV=1|Isoform 10 of Tumor protein p73 OS=Homo sapiens GN=TP73|Isoform dN-Alpha of Tumor protein p73 OS=Homo sapiens GN=TP73	1	4	3	7	6.41354	3.70323	21.3897	16.8221	6.18835e-08	4.09662e-07	9.08492	0.986783	1	1	WT - Control	limma	6.18835e-08	4.09662e-07	TRUE	hit	6.41354
360	MOGS	Q13724|Q13724-2	Mannosyl-oligosaccharide glucosidase OS=Homo sapiens GN=MOGS PE=1 SV=5|Isoform 2 of Mannosyl-oligosaccharide glucosidase OS=Homo sapiens GN=MOGS	1	4	3	3	6.42282	3.04366	21.4677	16.8135	6.21533e-08	4.10248e-07	9.08058	0.986789	1	1	WT - Control	limma	6.21533e-08	4.10248e-07	TRUE	hit	6.42282
361	MT	P00403|P00414|P00846|P03915	Cytochrome c oxidase subunit 2 OS=Homo sapiens GN=MT-CO2 PE=1 SV=1|Cytochrome c oxidase subunit 3 OS=Homo sapiens GN=MT-CO3 PE=1 SV=2|ATP synthase subunit a OS=Homo sapiens GN=MT-ATP6 PE=1 SV=1|NADH-ubiquinone oxidoreductase chain 5 OS=Homo sapiens GN=MT-ND5 PE=1 SV=2	1	4	3	7	6.77025	3.76751	22.4054	16.7919	6.2832e-08	4.13282e-07	9.06975	0.986806	1	1	WT - Control	limma	6.2832e-08	4.13282e-07	TRUE	hit	6.77025
362	PIGX	H0Y2P9|Q8TBF5|Q8TBF5-2	Phosphatidylinositol-glycan biosynthesis class X protein OS=Homo sapiens GN=PIGX PE=1 SV=1|Phosphatidylinositol-glycan biosynthesis class X protein OS=Homo sapiens GN=PIGX PE=2 SV=3|Isoform 2 of Phosphatidylinositol-glycan biosynthesis class X protein OS=Homo sapiens GN=PIGX	1	4	3	3	6.47065	3.79499	20.6756	16.7873	6.2978e-08	4.13282e-07	9.06743	0.98681	1	1	WT - Control	limma	6.2978e-08	4.13282e-07	TRUE	hit	6.47065
363	ASCC3	Q8N3C0	Activating signal cointegrator 1 complex subunit 3 OS=Homo sapiens GN=ASCC3 PE=1 SV=3	1	4	3	13	6.55545	2.97839	23.0568	16.7806	6.31917e-08	4.13485e-07	9.06405	0.986815	1	1	WT - Control	limma	6.31917e-08	4.13485e-07	TRUE	hit	6.55545
364	INTS7	Q9NVH2|Q9NVH2-2|Q9NVH2-3|Q9NVH2-4	Integrator complex subunit 7 OS=Homo sapiens GN=INTS7 PE=1 SV=1|Isoform 2 of Integrator complex subunit 7 OS=Homo sapiens GN=INTS7|Isoform 3 of Integrator complex subunit 7 OS=Homo sapiens GN=INTS7|Isoform 4 of Integrator complex subunit 7 OS=Homo sapiens GN=INTS7	1	4	3	3	6.05024	3.46351	20.9539	16.7735	6.34175e-08	4.13768e-07	9.06049	0.986821	1	1	WT - Control	limma	6.34175e-08	4.13768e-07	TRUE	hit	6.05024
365	PRDX4	Q13162	Peroxiredoxin-4 OS=Homo sapiens GN=PRDX4 PE=1 SV=1	1	4	3	5	6.76984	3.31413	22.1712	16.767	6.36246e-08	4.13925e-07	9.05724	0.986826	1	1	WT - Control	limma	6.36246e-08	4.13925e-07	TRUE	hit	6.76984
366	KLHL22	Q53GT1	Kelch-like protein 22 OS=Homo sapiens GN=KLHL22 PE=1 SV=2	1	4	3	8	6.39913	4.12595	21.9809	16.7512	6.41345e-08	4.16047e-07	9.04928	0.986838	1	1	WT - Control	limma	6.41345e-08	4.16047e-07	TRUE	hit	6.39913
367	GGCX	P38435|P38435-2	Vitamin K-dependent gamma-carboxylase OS=Homo sapiens GN=GGCX PE=1 SV=2|Isoform 2 of Vitamin K-dependent gamma-carboxylase OS=Homo sapiens GN=GGCX	1	4	3	6	6.32481	3.69345	21.9067	16.6951	6.59819e-08	4.26809e-07	9.02092	0.986882	1	1	WT - Control	limma	6.59819e-08	4.26809e-07	TRUE	hit	6.32481
368	ABCD3	P28288	ATP-binding cassette sub-family D member 3 OS=Homo sapiens GN=ABCD3 PE=1 SV=1	1	4	3	10	6.60277	3.36871	22.8778	16.6864	6.62719e-08	4.27463e-07	9.01654	0.986889	1	1	WT - Control	limma	6.62719e-08	4.27463e-07	TRUE	hit	6.60277
369	PLP1	A0A0U1RVI3|B1B1G3|B1B1G4|B1B1G6|P60201	Myelin proteolipid protein (Fragment) OS=Homo sapiens GN=PLP1 PE=1 SV=1|Myelin proteolipid protein (Fragment) OS=Homo sapiens GN=PLP1 PE=1 SV=7|Myelin proteolipid protein (Fragment) OS=Homo sapiens GN=PLP1 PE=1 SV=1|Myelin proteolipid protein (Fragment) OS=Homo sapiens GN=PLP1 PE=4 SV=2|Myelin proteolipid protein OS=Homo sapiens GN=PLP1 PE=1 SV=2	1	4	3	3	5.85913	4.81265	21.2936	16.6806	2.55675e-07	9.55196e-07	7.69961	0.986894	1	1	WT - Control	limma	2.55675e-07	9.55196e-07	TRUE	hit	5.85913
370	AMBRA1	A0A075B6T1|Q9C0C7|Q9C0C7-2|Q9C0C7-3|Q9C0C7-4|Q9C0C7-5	Activating molecule in BECN1-regulated autophagy protein 1 OS=Homo sapiens GN=AMBRA1 PE=1 SV=1|Activating molecule in BECN1-regulated autophagy protein 1 OS=Homo sapiens GN=AMBRA1 PE=1 SV=2|Isoform 2 of Activating molecule in BECN1-regulated autophagy protein 1 OS=Homo sapiens GN=AMBRA1|Isoform 3 of Activating molecule in BECN1-regulated autophagy protein 1 OS=Homo sapiens GN=AMBRA1|Isoform 4 of …	1	4	3	8	6.17568	3.33004	21.553	16.673	6.67248e-08	4.29162e-07	9.00974	0.9869	1	1	WT - Control	limma	6.67248e-08	4.29162e-07	TRUE	hit	6.17568
371	PPP6C	O00743	Serine/threonine-protein phosphatase 6 catalytic subunit OS=Homo sapiens GN=PPP6C PE=1 SV=1	1	4	3	4	6.50376	3.65309	21.9842	16.6473	2.59542e-07	9.63284e-07	7.75381	0.98692	1	1	WT - Control	limma	2.59542e-07	9.63284e-07	TRUE	hit	6.50376
372	POLE	F5H1D6|Q07864	DNA polymerase OS=Homo sapiens GN=POLE PE=1 SV=1|DNA polymerase epsilon catalytic subunit A OS=Homo sapiens GN=POLE PE=1 SV=5	1	4	3	15	6.40856	3.77751	22.7631	16.6274	6.82866e-08	4.37963e-07	8.98662	0.986935	1	1	WT - Control	limma	6.82866e-08	4.37963e-07	TRUE	hit	6.40856
373	STT3B	Q8TCJ2	Dolichyl-diphosphooligosaccharide--protein glycosyltransferase subunit STT3B OS=Homo sapiens GN=STT3B PE=1 SV=1	1	4	3	4	6.39534	2.98025	21.4769	16.6216	6.84891e-08	4.38021e-07	8.98366	0.98694	1	1	WT - Control	limma	6.84891e-08	4.38021e-07	TRUE	hit	6.39534
374	MCU	Q8NE86|Q8NE86-3	Calcium uniporter protein, mitochondrial OS=Homo sapiens GN=MCU PE=1 SV=1|Isoform 3 of Calcium uniporter protein, mitochondrial OS=Homo sapiens GN=MCU	1	4	3	2	6.37245	3.11295	20.3223	16.6138	6.87615e-08	4.38524e-07	8.97969	0.986946	1	1	WT - Control	limma	6.87615e-08	4.38524e-07	TRUE	hit	6.37245
375	DCDC2	Q9UHG0	Doublecortin domain-containing protein 2 OS=Homo sapiens GN=DCDC2 PE=1 SV=2	1	4	3	2	6.10013	3.4443	20.5504	16.5995	6.92653e-08	4.40496e-07	8.97239	0.986957	1	1	WT - Control	limma	6.92653e-08	4.40496e-07	TRUE	hit	6.10013
376	NCAPD3	P42695	Condensin-2 complex subunit D3 OS=Homo sapiens GN=NCAPD3 PE=1 SV=2	1	4	3	10	6.69907	4.73357	22.8292	16.5875	6.96902e-08	4.41957e-07	8.96628	0.986967	1	1	WT - Control	limma	6.96902e-08	4.41957e-07	TRUE	hit	6.69907
377	MLLT11	Q13015	Protein AF1q OS=Homo sapiens GN=MLLT11 PE=1 SV=1	1	4	3	2	5.90392	4.04817	20.8337	16.5864	2.66792e-07	9.82143e-07	7.72714	0.986968	1	1	WT - Control	limma	2.66792e-07	9.82143e-07	TRUE	hit	5.90392
378	C16ORF58	H3BR29|H3BSM7|Q96GQ5	RUS1 family protein C16orf58 OS=Homo sapiens GN=C16orf58 PE=1 SV=1|RUS1 family protein C16orf58 OS=Homo sapiens GN=C16orf58 PE=1 SV=1|RUS1 family protein C16orf58 OS=Homo sapiens GN=C16orf58 PE=1 SV=2	1	4	3	3	5.84611	3.22512	20.5145	16.5803	6.99462e-08	4.42341e-07	8.96261	0.986973	1	1	WT - Control	limma	6.99462e-08	4.42341e-07	TRUE	hit	5.84611
379	NDUFS2	O75306|O75306-2	NADH dehydrogenase [ubiquinone] iron-sulfur protein 2, mitochondrial OS=Homo sapiens GN=NDUFS2 PE=1 SV=2|Isoform 2 of NADH dehydrogenase [ubiquinone] iron-sulfur protein 2, mitochondrial OS=Homo sapiens GN=NDUFS2	1	4	3	5	6.59801	4.74487	22.237	16.5602	7.06652e-08	4.44407e-07	8.95238	0.986988	1	1	WT - Control	limma	7.06652e-08	4.44407e-07	TRUE	hit	6.59801
380	TANGO6	Q9C0B7	Transport and Golgi organization protein 6 homolog OS=Homo sapiens GN=TANGO6 PE=1 SV=2	1	4	3	4	5.72311	3.61259	20.4782	16.5602	7.06654e-08	4.44407e-07	8.95238	0.986988	1	1	WT - Control	limma	7.06654e-08	4.44407e-07	TRUE	hit	5.72311
381	NPTN	Q9Y639|Q9Y639-1|Q9Y639-3|Q9Y639-5	Neuroplastin OS=Homo sapiens GN=NPTN PE=1 SV=2|Isoform 1 of Neuroplastin OS=Homo sapiens GN=NPTN|Isoform 3 of Neuroplastin OS=Homo sapiens GN=NPTN|Isoform 5 of Neuroplastin OS=Homo sapiens GN=NPTN	1	4	3	3	6.21552	3.65691	21.2988	16.5429	7.12954e-08	4.47127e-07	8.9435	0.987002	1	1	WT - Control	limma	7.12954e-08	4.47127e-07	TRUE	hit	6.21552
382	ZMYM2	Q9UBW7	Zinc finger MYM-type protein 2 OS=Homo sapiens GN=ZMYM2 PE=1 SV=1	1	4	3	14	6.96026	4.49249	22.9154	16.5211	7.20943e-08	4.49646e-07	8.93235	0.987019	1	1	WT - Control	limma	7.20943e-08	4.49646e-07	TRUE	hit	6.96026
383	LAMB1	G3XAI2|P07942	Laminin subunit beta-1 OS=Homo sapiens GN=LAMB1 PE=1 SV=1|Laminin subunit beta-1 OS=Homo sapiens GN=LAMB1 PE=1 SV=2	1	4	3	6	6.2364	3.53757	21.5501	16.4938	7.31061e-08	4.54704e-07	8.9184	0.98704	1	1	WT - Control	limma	7.31061e-08	4.54704e-07	TRUE	hit	6.2364
384	PML	P29590|P29590-11|P29590-12|P29590-5	Protein PML OS=Homo sapiens GN=PML PE=1 SV=3|Isoform PML-11 of Protein PML OS=Homo sapiens GN=PML|Isoform PML-12 of Protein PML OS=Homo sapiens GN=PML|Isoform PML-4 of Protein PML OS=Homo sapiens GN=PML	1	4	3	5	6.20137	2.8911	21.7652	16.4861	7.33969e-08	4.55262e-07	8.91443	0.987047	1	1	WT - Control	limma	7.33969e-08	4.55262e-07	TRUE	hit	6.20137
385	TRAM1	G3XAN4|Q15629|Q15629-2	Translocating chain-associated membrane protein 1 OS=Homo sapiens GN=TRAM1 PE=1 SV=1|Translocating chain-associated membrane protein 1 OS=Homo sapiens GN=TRAM1 PE=1 SV=3|Isoform 2 of Translocating chain-associated membrane protein 1 OS=Homo sapiens GN=TRAM1	1	4	3	2	6.6454	4.13178	20.5863	16.4781	7.36986e-08	4.55604e-07	8.91032	0.987053	1	1	WT - Control	limma	7.36986e-08	4.55604e-07	TRUE	hit	6.6454
386	TCP1	P17987	T-complex protein 1 subunit alpha OS=Homo sapiens GN=TCP1 PE=1 SV=1	1	4	3	12	7.50018	2.83178	23.9165	16.474	7.38545e-08	4.55604e-07	8.9082	0.987056	1	1	WT - Control	limma	7.38545e-08	4.55604e-07	TRUE	hit	7.50018
387	GTF3C1	Q12789|Q12789-3	General transcription factor 3C polypeptide 1 OS=Homo sapiens GN=GTF3C1 PE=1 SV=4|Isoform 2 of General transcription factor 3C polypeptide 1 OS=Homo sapiens GN=GTF3C1	1	4	3	11	6.36307	2.87091	22.3849	16.4682	7.40748e-08	4.55721e-07	8.90522	0.987061	1	1	WT - Control	limma	7.40748e-08	4.55721e-07	TRUE	hit	6.36307
388	SAR1A	H0Y5E8|Q9NR31|Q9NR31-2	GTP-binding protein SAR1a (Fragment) OS=Homo sapiens GN=SAR1A PE=1 SV=1|GTP-binding protein SAR1a OS=Homo sapiens GN=SAR1A PE=1 SV=1|Isoform 2 of GTP-binding protein SAR1a OS=Homo sapiens GN=SAR1A	1	4	3	2	5.70641	3.11299	21.3219	16.4471	7.48792e-08	4.57301e-07	8.89441	0.987077	1	1	WT - Control	limma	7.48792e-08	4.57301e-07	TRUE	hit	5.70641
389	GNL3	Q9BVP2|Q9BVP2-2	Guanine nucleotide-binding protein-like 3 OS=Homo sapiens GN=GNL3 PE=1 SV=2|Isoform 2 of Guanine nucleotide-binding protein-like 3 OS=Homo sapiens GN=GNL3	1	4	3	10	6.84761	2.98965	23.623	16.4456	7.49376e-08	4.57301e-07	8.89362	0.987078	1	1	WT - Control	limma	7.49376e-08	4.57301e-07	TRUE	hit	6.84761
390	SRM	P19623	Spermidine synthase OS=Homo sapiens GN=SRM PE=1 SV=1	1	4	3	4	6.65403	3.21139	21.8443	16.4296	7.55562e-08	4.59248e-07	8.88539	0.987091	1	1	WT - Control	limma	7.55562e-08	4.59248e-07	TRUE	hit	6.65403
391	NKAP	Q8N5F7	NF-kappa-B-activating protein OS=Homo sapiens GN=NKAP PE=1 SV=1	1	4	3	2	6.51531	2.91408	20.9869	16.422	7.58517e-08	4.59248e-07	8.88148	0.987097	1	1	WT - Control	limma	7.58517e-08	4.59248e-07	TRUE	hit	6.51531
392	RRM2	P31350|P31350-2	Ribonucleoside-diphosphate reductase subunit M2 OS=Homo sapiens GN=RRM2 PE=1 SV=1|Isoform 2 of Ribonucleoside-diphosphate reductase subunit M2 OS=Homo sapiens GN=RRM2	1	4	3	5	6.46766	3.77791	21.7392	16.4217	7.58653e-08	4.59248e-07	8.8813	0.987097	1	1	WT - Control	limma	7.58653e-08	4.59248e-07	TRUE	hit	6.46766
393	PKP2	Q99959|Q99959-2	Plakophilin-2 OS=Homo sapiens GN=PKP2 PE=1 SV=2|Isoform 1 of Plakophilin-2 OS=Homo sapiens GN=PKP2	1	4	3	10	6.44671	2.94373	23.3775	16.3992	7.67473e-08	4.63184e-07	8.86972	0.987115	1	1	WT - Control	limma	7.67473e-08	4.63184e-07	TRUE	hit	6.44671
394	DNAJA3	Q96EY1|Q96EY1-2	DnaJ homolog subfamily A member 3, mitochondrial OS=Homo sapiens GN=DNAJA3 PE=1 SV=2|Isoform 2 of DnaJ homolog subfamily A member 3, mitochondrial OS=Homo sapiens GN=DNAJA3	1	4	3	3	6.68903	5.35552	22.0546	16.3923	7.70242e-08	4.63184e-07	8.86611	0.98712	1	1	WT - Control	limma	7.70242e-08	4.63184e-07	TRUE	hit	6.68903
395	PRPF6	O94906|O94906-2	Pre-mRNA-processing factor 6 OS=Homo sapiens GN=PRPF6 PE=1 SV=1|Isoform 2 of Pre-mRNA-processing factor 6 OS=Homo sapiens GN=PRPF6	1	4	3	16	6.89763	2.94523	24.472	16.3896	7.71292e-08	4.63184e-07	8.86474	0.987122	1	1	WT - Control	limma	7.71292e-08	4.63184e-07	TRUE	hit	6.89763
396	UBAP2L	F8W726|Q14157|Q14157-3|Q14157-5	Ubiquitin-associated protein 2-like OS=Homo sapiens GN=UBAP2L PE=1 SV=2|Ubiquitin-associated protein 2-like OS=Homo sapiens GN=UBAP2L PE=1 SV=2|Isoform 3 of Ubiquitin-associated protein 2-like OS=Homo sapiens GN=UBAP2L|Isoform 5 of Ubiquitin-associated protein 2-like OS=Homo sapiens GN=UBAP2L	1	4	3	7	6.20921	3.20914	22.6878	16.3751	7.77096e-08	4.64478e-07	8.85723	0.987134	1	1	WT - Control	limma	7.77096e-08	4.64478e-07	TRUE	hit	6.20921
397	MTPAP	Q9NVV4|Q9NVV4-2	Poly(A) RNA polymerase, mitochondrial OS=Homo sapiens GN=MTPAP PE=1 SV=1|Isoform 2 of Poly(A) RNA polymerase, mitochondrial OS=Homo sapiens GN=MTPAP	1	4	3	3	5.82587	3.43606	20.9207	16.3739	7.7755e-08	4.64478e-07	8.85664	0.987135	1	1	WT - Control	limma	7.7755e-08	4.64478e-07	TRUE	hit	5.82587
398	ELAC2	G5E9D5|Q9BQ52|Q9BQ52-4	ElaC homolog 2 (E. coli), isoform CRA_a OS=Homo sapiens GN=ELAC2 PE=1 SV=1|Zinc phosphodiesterase ELAC protein 2 OS=Homo sapiens GN=ELAC2 PE=1 SV=2|Isoform 4 of Zinc phosphodiesterase ELAC protein 2 OS=Homo sapiens GN=ELAC2	1	4	3	6	6.21543	2.84336	21.6787	16.368	7.79932e-08	4.64675e-07	8.85358	0.987139	1	1	WT - Control	limma	7.79932e-08	4.64675e-07	TRUE	hit	6.21543
399	SUGP2	M0R2Z9|Q8IX01|Q8IX01-4	SURP and G-patch domain-containing protein 2 OS=Homo sapiens GN=SUGP2 PE=1 SV=1|SURP and G-patch domain-containing protein 2 OS=Homo sapiens GN=SUGP2 PE=1 SV=2|Isoform 4 of SURP and G-patch domain-containing protein 2 OS=Homo sapiens GN=SUGP2	1	4	3	8	6.41602	3.00162	22.6883	16.361	7.82757e-08	4.65134e-07	8.84995	0.987145	1	1	WT - Control	limma	7.82757e-08	4.65134e-07	TRUE	hit	6.41602
400	AKAP8L	Q9ULX6	A-kinase anchor protein 8-like OS=Homo sapiens GN=AKAP8L PE=1 SV=3	1	4	3	10	7.29227	3.51035	23.1183	16.3392	7.91643e-08	4.69183e-07	8.83863	0.987162	1	1	WT - Control	limma	7.91643e-08	4.69183e-07	TRUE	hit	7.29227
401	NDUFV1	B4DE93|G3V0I5|P49821|P49821-2	NADH dehydrogenase [ubiquinone] flavoprotein 1, mitochondrial OS=Homo sapiens GN=NDUFV1 PE=1 SV=1|NADH dehydrogenase (Ubiquinone) flavoprotein 1, 51kDa, isoform CRA_c OS=Homo sapiens GN=NDUFV1 PE=1 SV=1|NADH dehydrogenase [ubiquinone] flavoprotein 1, mitochondrial OS=Homo sapiens GN=NDUFV1 PE=1 SV=4|Isoform 2 of NADH dehydrogenase [ubiquinone] flavoprotein 1, mitochondrial OS=Homo sapiens GN=NDUF…	1	4	3	3	5.87999	3.36206	20.8052	16.2857	3.06052e-07	1.08692e-06	7.59389	0.987204	1	1	WT - Control	limma	3.06052e-07	1.08692e-06	TRUE	hit	5.87999
402	MAGED2	Q9UNF1	Melanoma-associated antigen D2 OS=Homo sapiens GN=MAGED2 PE=1 SV=2	1	4	3	10	6.8075	4.18643	23.9208	16.2585	8.25456e-08	4.87946e-07	8.79667	0.987225	1	1	WT - Control	limma	8.25456e-08	4.87946e-07	TRUE	hit	6.8075
403	NFXL1	Q6ZNB6	NF-X1-type zinc finger protein NFXL1 OS=Homo sapiens GN=NFXL1 PE=1 SV=2	1	4	3	7	6.85251	3.96826	21.7737	16.2492	8.29448e-08	4.89029e-07	8.79183	0.987233	1	1	WT - Control	limma	8.29448e-08	4.89029e-07	TRUE	hit	6.85251
404	LPCAT3	Q6P1A2	Lysophospholipid acyltransferase 5 OS=Homo sapiens GN=LPCAT3 PE=1 SV=1	1	4	3	3	6.41848	4.119	21.6281	16.2232	8.40728e-08	4.93459e-07	8.77827	0.987253	1	1	WT - Control	limma	8.40728e-08	4.93459e-07	TRUE	hit	6.41848
405	CCAR2	Q8N163|Q8N163-2	Cell cycle and apoptosis regulator protein 2 OS=Homo sapiens GN=CCAR2 PE=1 SV=2|Isoform 2 of Cell cycle and apoptosis regulator protein 2 OS=Homo sapiens GN=CCAR2	1	4	3	13	7.16088	2.8711	24.3321	16.2133	8.45077e-08	4.93459e-07	8.77309	0.987261	1	1	WT - Control	limma	8.45077e-08	4.93459e-07	TRUE	hit	7.16088
406	MADD	A0A0A0MRB5|Q8WXG6|Q8WXG6-2|Q8WXG6-3|Q8WXG6-4|Q8WXG6-5|Q8WXG6-6|Q8WXG6-7|Q8WXG6-8	MAP kinase-activating death domain protein OS=Homo sapiens GN=MADD PE=1 SV=1|MAP kinase-activating death domain protein OS=Homo sapiens GN=MADD PE=1 SV=2|Isoform 2 of MAP kinase-activating death domain protein OS=Homo sapiens GN=MADD|Isoform 3 of MAP kinase-activating death domain protein OS=Homo sapiens GN=MADD|Isoform 4 of MAP kinase-activating death domain protein OS=Homo sapiens GN=MADD|Isofo…	1	4	3	6	6.48415	3.53023	21.5111	16.2093	8.4682e-08	4.93459e-07	8.77102	0.987264	1	1	WT - Control	limma	8.4682e-08	4.93459e-07	TRUE	hit	6.48415
407	SUCLA2	Q9P2R7|Q9P2R7-2	Succinyl-CoA ligase [ADP-forming] subunit beta, mitochondrial OS=Homo sapiens GN=SUCLA2 PE=1 SV=3|Isoform 2 of Succinyl-CoA ligase [ADP-forming] subunit beta, mitochondrial OS=Homo sapiens GN=SUCLA2	1	4	3	8	6.82928	3.69026	22.7779	16.207	8.47836e-08	4.93459e-07	8.76982	0.987266	1	1	WT - Control	limma	8.47836e-08	4.93459e-07	TRUE	hit	6.82928
408	ASPM	Q8IZT6	Abnormal spindle-like microcephaly-associated protein OS=Homo sapiens GN=ASPM PE=1 SV=2	1	4	3	6	6.12462	3.64	21.9121	16.2026	8.49812e-08	4.93459e-07	8.76748	0.987269	1	1	WT - Control	limma	8.49812e-08	4.93459e-07	TRUE	hit	6.12462
409	RHOBTB3	O94955	Rho-related BTB domain-containing protein 3 OS=Homo sapiens GN=RHOBTB3 PE=1 SV=2	1	4	3	4	6.16497	3.9395	20.6366	16.1982	8.51734e-08	4.93459e-07	8.76521	0.987273	1	1	WT - Control	limma	8.51734e-08	4.93459e-07	TRUE	hit	6.16497
410	NUP155	E9PF10|O75694|O75694-2	Nuclear pore complex protein Nup155 OS=Homo sapiens GN=NUP155 PE=1 SV=1|Nuclear pore complex protein Nup155 OS=Homo sapiens GN=NUP155 PE=1 SV=1|Isoform 2 of Nuclear pore complex protein Nup155 OS=Homo sapiens GN=NUP155	1	4	3	11	6.63245	2.96763	23.3578	16.1898	8.55507e-08	4.93459e-07	8.76077	0.987279	1	1	WT - Control	limma	8.55507e-08	4.93459e-07	TRUE	hit	6.63245
411	ZNF609	O15014	Zinc finger protein 609 OS=Homo sapiens GN=ZNF609 PE=1 SV=2	1	4	3	5	6.15987	3.2037	21.6321	16.1896	8.55575e-08	4.93459e-07	8.76069	0.987279	1	1	WT - Control	limma	8.55575e-08	4.93459e-07	TRUE	hit	6.15987
412	HELZ	J3QS41|P42694	Probable helicase with zinc finger domain OS=Homo sapiens GN=HELZ PE=1 SV=1|Probable helicase with zinc finger domain OS=Homo sapiens GN=HELZ PE=1 SV=2	1	4	3	9	6.14995	3.33086	22.3699	16.1874	8.56578e-08	4.93459e-07	8.75951	0.987281	1	1	WT - Control	limma	8.56578e-08	4.93459e-07	TRUE	hit	6.14995
413	PPIL2	Q13356|Q13356-2	Peptidyl-prolyl cis-trans isomerase-like 2 OS=Homo sapiens GN=PPIL2 PE=1 SV=1|Isoform 2 of Peptidyl-prolyl cis-trans isomerase-like 2 OS=Homo sapiens GN=PPIL2	1	4	3	5	5.71318	3.09286	21.3875	16.1782	8.60663e-08	4.94553e-07	8.75473	0.987288	1	1	WT - Control	limma	8.60663e-08	4.94553e-07	TRUE	hit	5.71318
414	IQCB1	Q15051|Q15051-2	IQ calmodulin-binding motif-containing protein 1 OS=Homo sapiens GN=IQCB1 PE=1 SV=1|Isoform 2 of IQ calmodulin-binding motif-containing protein 1 OS=Homo sapiens GN=IQCB1	1	4	3	6	6.34266	4.04772	22.1469	16.1697	8.64501e-08	4.95501e-07	8.75026	0.987295	1	1	WT - Control	limma	8.64501e-08	4.95501e-07	TRUE	hit	6.34266
415	NPEPPS	E9PLK3|P55786	Puromycin-sensitive aminopeptidase OS=Homo sapiens GN=NPEPPS PE=1 SV=1|Puromycin-sensitive aminopeptidase OS=Homo sapiens GN=NPEPPS PE=1 SV=2	1	4	3	9	6.6522	2.9624	22.7676	16.1606	8.6863e-08	4.96611e-07	8.74547	0.987302	1	1	WT - Control	limma	8.6863e-08	4.96611e-07	TRUE	hit	6.6522
416	MAP7D3	Q8IWC1|Q8IWC1-2	MAP7 domain-containing protein 3 OS=Homo sapiens GN=MAP7D3 PE=1 SV=2|Isoform 2 of MAP7 domain-containing protein 3 OS=Homo sapiens GN=MAP7D3	1	4	3	10	6.64853	4.1861	22.644	16.1535	8.7185e-08	4.96869e-07	8.74176	0.987308	1	1	WT - Control	limma	8.7185e-08	4.96869e-07	TRUE	hit	6.64853
417	SBF1	O95248-4	Isoform 4 of Myotubularin-related protein 5 OS=Homo sapiens GN=SBF1	1	4	3	7	6.21476	2.87043	21.6222	16.15	8.73471e-08	4.96869e-07	8.73989	0.987311	1	1	WT - Control	limma	8.73471e-08	4.96869e-07	TRUE	hit	6.21476
418	PLOD2	E7ETU9|O00469|O00469-2	Procollagen-lysine,2-oxoglutarate 5-dioxygenase 2 OS=Homo sapiens GN=PLOD2 PE=1 SV=1|Procollagen-lysine,2-oxoglutarate 5-dioxygenase 2 OS=Homo sapiens GN=PLOD2 PE=1 SV=2|Isoform 2 of Procollagen-lysine,2-oxoglutarate 5-dioxygenase 2 OS=Homo sapiens GN=PLOD2	1	4	3	3	6.19171	3.65698	21.9155	16.1497	3.25926e-07	1.13946e-06	7.5326	0.987311	1	1	WT - Control	limma	3.25926e-07	1.13946e-06	TRUE	hit	6.19171
419	DYM	Q7RTS9	Dymeclin OS=Homo sapiens GN=DYM PE=1 SV=1	1	4	3	3	6.35725	3.86257	20.9034	16.1357	8.79988e-08	4.99322e-07	8.73242	0.987322	1	1	WT - Control	limma	8.79988e-08	4.99322e-07	TRUE	hit	6.35725
420	FAM193A	P78312-2|P78312-6	Isoform 2 of Protein FAM193A OS=Homo sapiens GN=FAM193A|Isoform 6 of Protein FAM193A OS=Homo sapiens GN=FAM193A	1	4	3	4	5.80868	3.18932	21.9042	16.1211	8.86766e-08	5.01909e-07	8.72471	0.987333	1	1	WT - Control	limma	8.86766e-08	5.01909e-07	TRUE	hit	5.80868
421	PDXDC1	Q6P996|Q6P996-4|Q6P996-5	Pyridoxal-dependent decarboxylase domain-containing protein 1 OS=Homo sapiens GN=PDXDC1 PE=1 SV=2|Isoform 4 of Pyridoxal-dependent decarboxylase domain-containing protein 1 OS=Homo sapiens GN=PDXDC1|Isoform 5 of Pyridoxal-dependent decarboxylase domain-containing protein 1 OS=Homo sapiens GN=PDXDC1	1	4	3	2	6.23867	2.75617	20.493	16.1128	8.9063e-08	5.02429e-07	8.72034	0.98734	1	1	WT - Control	limma	8.9063e-08	5.02429e-07	TRUE	hit	6.23867
422	SORT1	Q99523	Sortilin OS=Homo sapiens GN=SORT1 PE=1 SV=3	1	4	3	3	6.1246	3.55239	21.2333	16.1096	8.92122e-08	5.02429e-07	8.71865	0.987342	1	1	WT - Control	limma	8.92122e-08	5.02429e-07	TRUE	hit	6.1246
423	ZNF100	A0A075B7G6|A0A0A0MTN5|Q8IYN0	Zinc finger protein 100 OS=Homo sapiens GN=ZNF100 PE=1 SV=2|Zinc finger protein 100 OS=Homo sapiens GN=ZNF100 PE=1 SV=1|Zinc finger protein 100 OS=Homo sapiens GN=ZNF100 PE=2 SV=2	1	4	3	4	6.059	3.10096	21.6935	16.0943	8.99311e-08	5.04912e-07	8.71058	0.987354	1	1	WT - Control	limma	8.99311e-08	5.04912e-07	TRUE	hit	6.059
424	FAF2	Q96CS3	FAS-associated factor 2 OS=Homo sapiens GN=FAF2 PE=1 SV=2	1	4	3	6	6.72764	3.78523	21.6772	16.0891	9.01744e-08	5.04912e-07	8.70787	0.987358	1	1	WT - Control	limma	9.01744e-08	5.04912e-07	TRUE	hit	6.72764
425	RBFOX2	O43251-6|O43251-8	Isoform 6 of RNA binding protein fox-1 homolog 2 OS=Homo sapiens GN=RBFOX2|Isoform 8 of RNA binding protein fox-1 homolog 2 OS=Homo sapiens GN=RBFOX2	1	4	3	7	7.22489	4.64938	22.7738	16.0813	9.05452e-08	5.04912e-07	8.70374	0.987365	1	1	WT - Control	limma	9.05452e-08	5.04912e-07	TRUE	hit	7.22489
426	NEK9	Q8TD19	Serine/threonine-protein kinase Nek9 OS=Homo sapiens GN=NEK9 PE=1 SV=2	1	4	3	5	6.55744	2.88582	21.8073	16.062	9.14657e-08	5.08792e-07	8.69357	0.98738	1	1	WT - Control	limma	9.14657e-08	5.08792e-07	TRUE	hit	6.55744
427	STAT1	J3KPM9|P42224|P42224-2	Signal transducer and activator of transcription OS=Homo sapiens GN=STAT1 PE=1 SV=1|Signal transducer and activator of transcription 1-alpha/beta OS=Homo sapiens GN=STAT1 PE=1 SV=2|Isoform Beta of Signal transducer and activator of transcription 1-alpha/beta OS=Homo sapiens GN=STAT1	1	4	3	4	6.12682	2.798	20.5178	16.0399	9.25365e-08	5.13487e-07	8.68186	0.987397	1	1	WT - Control	limma	9.25365e-08	5.13487e-07	TRUE	hit	6.12682
428	UTP15	H0Y8P4|Q8TED0|Q8TED0-3	U3 small nucleolar RNA-associated protein 15 homolog (Fragment) OS=Homo sapiens GN=UTP15 PE=1 SV=1|U3 small nucleolar RNA-associated protein 15 homolog OS=Homo sapiens GN=UTP15 PE=1 SV=3|Isoform 3 of U3 small nucleolar RNA-associated protein 15 homolog OS=Homo sapiens GN=UTP15	1	4	3	5	6.20294	2.752	21.8162	15.9896	9.50225e-08	5.25993e-07	8.65518	0.987437	1	1	WT - Control	limma	9.50225e-08	5.25993e-07	TRUE	hit	6.20294
429	LSM12	Q3MHD2|Q3MHD2-2	Protein LSM12 homolog OS=Homo sapiens GN=LSM12 PE=1 SV=2|Isoform 2 of Protein LSM12 homolog OS=Homo sapiens GN=LSM12	1	4	3	3	6.07944	3.14214	21.2882	15.9625	9.63913e-08	5.32268e-07	8.64078	0.987458	1	1	WT - Control	limma	9.63913e-08	5.32268e-07	TRUE	hit	6.07944
430	PPOX	P50336	Protoporphyrinogen oxidase OS=Homo sapiens GN=PPOX PE=1 SV=1	1	4	3	5	6.26356	3.71719	21.7511	15.9197	9.85978e-08	5.41725e-07	8.61798	0.987491	1	1	WT - Control	limma	9.85978e-08	5.41725e-07	TRUE	hit	6.26356
431	COL14A1	Q05707|Q05707-2	Collagen alpha-1(XIV) chain OS=Homo sapiens GN=COL14A1 PE=1 SV=3|Isoform 2 of Collagen alpha-1(XIV) chain OS=Homo sapiens GN=COL14A1	1	4	3	6	6.05896	3.03055	21.3506	15.9155	9.88217e-08	5.41725e-07	8.61569	0.987495	1	1	WT - Control	limma	9.88217e-08	5.41725e-07	TRUE	hit	6.05896
432	UBE3C	Q15386	Ubiquitin-protein ligase E3C OS=Homo sapiens GN=UBE3C PE=1 SV=3	1	4	3	4	6.05132	3.41773	21.5235	15.906	9.93177e-08	5.43129e-07	8.61065	0.987502	1	1	WT - Control	limma	9.93177e-08	5.43129e-07	TRUE	hit	6.05132
433	MTO1	Q9Y2Z2|Q9Y2Z2-4|Q9Y2Z2-5|Q9Y2Z2-6	Protein MTO1 homolog, mitochondrial OS=Homo sapiens GN=MTO1 PE=1 SV=2|Isoform 5 of Protein MTO1 homolog, mitochondrial OS=Homo sapiens GN=MTO1|Isoform 6 of Protein MTO1 homolog, mitochondrial OS=Homo sapiens GN=MTO1|Isoform 7 of Protein MTO1 homolog, mitochondrial OS=Homo sapiens GN=MTO1	1	4	3	5	6.35489	4.42566	21.4917	15.8971	9.97876e-08	5.44383e-07	8.60589	0.987509	1	1	WT - Control	limma	9.97876e-08	5.44383e-07	TRUE	hit	6.35489
434	IFT122	Q9HBG6|Q9HBG6-3|Q9HBG6-5|Q9HBG6-6	Intraflagellar transport protein 122 homolog OS=Homo sapiens GN=IFT122 PE=1 SV=2|Isoform 3 of Intraflagellar transport protein 122 homolog OS=Homo sapiens GN=IFT122|Isoform 5 of Intraflagellar transport protein 122 homolog OS=Homo sapiens GN=IFT122|Isoform 6 of Intraflagellar transport protein 122 homolog OS=Homo sapiens GN=IFT122	1	4	3	5	6.11908	2.78329	21.484	15.8884	1.0025e-07	5.44553e-07	8.60123	0.987516	1	1	WT - Control	limma	1.0025e-07	5.44553e-07	TRUE	hit	6.11908
435	FRAS1	Q86XX4|Q86XX4-2	Extracellular matrix protein FRAS1 OS=Homo sapiens GN=FRAS1 PE=1 SV=2|Isoform 2 of Extracellular matrix protein FRAS1 OS=Homo sapiens GN=FRAS1	1	4	3	6	5.78942	2.95882	21.1809	15.886	1.00379e-07	5.44553e-07	8.59994	0.987518	1	1	WT - Control	limma	1.00379e-07	5.44553e-07	TRUE	hit	5.78942
436	PALD1	Q9ULE6	Paladin OS=Homo sapiens GN=PALD1 PE=1 SV=3	1	4	3	8	6.36334	3.61285	22.1427	15.883	1.0054e-07	5.44553e-07	8.59832	0.98752	1	1	WT - Control	limma	1.0054e-07	5.44553e-07	TRUE	hit	6.36334
437	SMG8	Q8ND04|Q8ND04-2	Protein SMG8 OS=Homo sapiens GN=SMG8 PE=1 SV=1|Isoform 2 of Protein SMG8 OS=Homo sapiens GN=SMG8	1	4	3	4	5.76661	2.94197	20.9981	15.8755	1.00938e-07	5.45403e-07	8.59434	0.987526	1	1	WT - Control	limma	1.00938e-07	5.45403e-07	TRUE	hit	5.76661
438	RHOT1	Q8IXI2-3|Q8IXI2-7	Isoform 3 of Mitochondrial Rho GTPase 1 OS=Homo sapiens GN=RHOT1|Isoform 7 of Mitochondrial Rho GTPase 1 OS=Homo sapiens GN=RHOT1	1	4	3	2	6.18139	2.79787	20.5082	15.8706	1.01201e-07	5.45522e-07	8.59172	0.98753	1	1	WT - Control	limma	1.01201e-07	5.45522e-07	TRUE	hit	6.18139
439	PSMB1	P20618	Proteasome subunit beta type-1 OS=Homo sapiens GN=PSMB1 PE=1 SV=2	1	4	3	4	6.51804	2.95053	22.0248	15.8569	1.0194e-07	5.47058e-07	8.58439	0.987541	1	1	WT - Control	limma	1.0194e-07	5.47058e-07	TRUE	hit	6.51804
440	RPS27L	H0YMV8|Q71UM5	40S ribosomal protein S27 OS=Homo sapiens GN=RPS27L PE=1 SV=1|40S ribosomal protein S27-like OS=Homo sapiens GN=RPS27L PE=1 SV=3	1	4	3	2	7.1908	3.35364	21.6157	15.856	1.01989e-07	5.47058e-07	8.5839	0.987542	1	1	WT - Control	limma	1.01989e-07	5.47058e-07	TRUE	hit	7.1908
441	SPTLC2	O15270	Serine palmitoyltransferase 2 OS=Homo sapiens GN=SPTLC2 PE=1 SV=1	1	4	3	4	6.46841	4.48109	21.4791	15.8517	1.02227e-07	5.47058e-07	8.58155	0.987545	1	1	WT - Control	limma	1.02227e-07	5.47058e-07	TRUE	hit	6.46841
442	PEX1	O43933	Peroxisome biogenesis factor 1 OS=Homo sapiens GN=PEX1 PE=1 SV=1	1	4	3	8	6.55901	4.47089	23.048	15.8475	1.02452e-07	5.47058e-07	8.57933	0.987548	1	1	WT - Control	limma	1.02452e-07	5.47058e-07	TRUE	hit	6.55901
443	CDC42EP1	Q00587|Q00587-2	Cdc42 effector protein 1 OS=Homo sapiens GN=CDC42EP1 PE=1 SV=1|Isoform 2 of Cdc42 effector protein 1 OS=Homo sapiens GN=CDC42EP1	1	4	3	6	6.87089	3.30431	21.5485	15.8368	1.03036e-07	5.48877e-07	8.5736	0.987557	1	1	WT - Control	limma	1.03036e-07	5.48877e-07	TRUE	hit	6.87089
444	XPO6	Q96QU8|Q96QU8-2	Exportin-6 OS=Homo sapiens GN=XPO6 PE=1 SV=1|Isoform 2 of Exportin-6 OS=Homo sapiens GN=XPO6	1	4	3	3	5.58564	3.14025	20.0733	15.8285	1.03494e-07	5.50026e-07	8.56913	0.987563	1	1	WT - Control	limma	1.03494e-07	5.50026e-07	TRUE	hit	5.58564
445	NUP107	P57740	Nuclear pore complex protein Nup107 OS=Homo sapiens GN=NUP107 PE=1 SV=1	1	4	3	9	6.82467	4.62358	22.7625	15.8087	1.04593e-07	5.53713e-07	8.55847	0.987579	1	1	WT - Control	limma	1.04593e-07	5.53713e-07	TRUE	hit	6.82467
446	SLIT2	O94813|O94813-2|O94813-3|X6R3P0	Slit homolog 2 protein OS=Homo sapiens GN=SLIT2 PE=1 SV=1|Isoform 2 of Slit homolog 2 protein OS=Homo sapiens GN=SLIT2|Isoform 3 of Slit homolog 2 protein OS=Homo sapiens GN=SLIT2|Slit homolog 2 protein OS=Homo sapiens GN=SLIT2 PE=1 SV=1	1	4	3	8	6.29798	2.77801	22.3915	15.8044	1.04831e-07	5.53713e-07	8.55618	0.987582	1	1	WT - Control	limma	1.04831e-07	5.53713e-07	TRUE	hit	6.29798
447	NRP2	A0A024R3W6|A0A024R412|O60462|O60462-2|O60462-3|O60462-4|O60462-5|Q7LBX6|X5D2Q8	Neuropilin 2, isoform CRA_h OS=Homo sapiens GN=NRP2 PE=1 SV=1|Neuropilin 2, isoform CRA_c OS=Homo sapiens GN=NRP2 PE=1 SV=1|Neuropilin-2 OS=Homo sapiens GN=NRP2 PE=1 SV=2|Isoform A0 of Neuropilin-2 OS=Homo sapiens GN=NRP2|Isoform A17 of Neuropilin-2 OS=Homo sapiens GN=NRP2|Isoform B0 of Neuropilin-2 OS=Homo sapiens GN=NRP2|Isoform B5 of Neuropilin-2 OS=Homo sapiens GN=NRP2|Neuropilin 2 OS=Homo sa…	1	4	3	5	6.04253	3.51942	21.0688	15.8028	1.04922e-07	5.53713e-07	8.55531	0.987583	1	1	WT - Control	limma	1.04922e-07	5.53713e-07	TRUE	hit	6.04253
448	AKAP10	E7EMD6|O43572	A-kinase anchor protein 10, mitochondrial OS=Homo sapiens GN=AKAP10 PE=1 SV=3|A-kinase anchor protein 10, mitochondrial OS=Homo sapiens GN=AKAP10 PE=1 SV=2	1	4	3	2	5.74256	3.88412	20.4522	15.7994	3.84153e-07	1.27525e-06	7.37188	0.987586	1	1	WT - Control	limma	3.84153e-07	1.27525e-06	TRUE	hit	5.74256
449	AP3D1	O14617|O14617-5	AP-3 complex subunit delta-1 OS=Homo sapiens GN=AP3D1 PE=1 SV=1|Isoform 5 of AP-3 complex subunit delta-1 OS=Homo sapiens GN=AP3D1	1	4	3	9	6.58475	2.98163	22.426	15.776	1.06434e-07	5.6018e-07	8.54087	0.987604	1	1	WT - Control	limma	1.06434e-07	5.6018e-07	TRUE	hit	6.58475
450	KIF23	H7BYN4|Q02241|Q02241-2	Kinesin-like protein OS=Homo sapiens GN=KIF23 PE=1 SV=1|Kinesin-like protein KIF23 OS=Homo sapiens GN=KIF23 PE=1 SV=3|Isoform 2 of Kinesin-like protein KIF23 OS=Homo sapiens GN=KIF23	1	4	3	4	5.90045	2.6794	22.1029	15.7696	1.06802e-07	5.6018e-07	8.53739	0.987609	1	1	WT - Control	limma	1.06802e-07	5.6018e-07	TRUE	hit	5.90045
451	TFB2M	Q9H5Q4	Dimethyladenosine transferase 2, mitochondrial OS=Homo sapiens GN=TFB2M PE=1 SV=1	1	4	3	3	6.52789	3.0361	20.4494	15.768	1.0689e-07	5.6018e-07	8.53656	0.987611	1	1	WT - Control	limma	1.0689e-07	5.6018e-07	TRUE	hit	6.52789
452	IMPA1	P29218|P29218-3	Inositol monophosphatase 1 OS=Homo sapiens GN=IMPA1 PE=1 SV=1|Isoform 3 of Inositol monophosphatase 1 OS=Homo sapiens GN=IMPA1	1	4	3	4	6.18746	3.1457	21.1662	15.7531	1.07743e-07	5.63351e-07	8.52853	0.987622	1	1	WT - Control	limma	1.07743e-07	5.63351e-07	TRUE	hit	6.18746
453	VPS18	Q9P253	Vacuolar protein sorting-associated protein 18 homolog OS=Homo sapiens GN=VPS18 PE=1 SV=2	1	4	3	3	5.97198	2.94225	20.642	15.7445	1.08243e-07	5.64562e-07	8.52387	0.987629	1	1	WT - Control	limma	1.08243e-07	5.64562e-07	TRUE	hit	5.97198
454	TSC2	H3BMQ0|P49815|P49815-2|P49815-3|P49815-4|P49815-5|P49815-6|P49815-7	Tuberin OS=Homo sapiens GN=TSC2 PE=1 SV=1|Tuberin OS=Homo sapiens GN=TSC2 PE=1 SV=2|Isoform 2 of Tuberin OS=Homo sapiens GN=TSC2|Isoform 3 of Tuberin OS=Homo sapiens GN=TSC2|Isoform 4 of Tuberin OS=Homo sapiens GN=TSC2|Isoform 5 of Tuberin OS=Homo sapiens GN=TSC2|Isoform 6 of Tuberin OS=Homo sapiens GN=TSC2|Isoform 7 of Tuberin OS=Homo sapiens GN=TSC2	1	4	3	3	5.98125	3.2975	20.1861	15.7439	3.94406e-07	1.29411e-06	7.34605	0.98763	1	1	WT - Control	limma	3.94406e-07	1.29411e-06	TRUE	hit	5.98125
455	MICU2	Q8IYU8	Calcium uptake protein 2, mitochondrial OS=Homo sapiens GN=MICU2 PE=1 SV=2	1	4	3	2	5.83915	2.89858	20.3943	15.7405	1.08474e-07	5.64562e-07	8.52171	0.987632	1	1	WT - Control	limma	1.08474e-07	5.64562e-07	TRUE	hit	5.83915
456	ACAD9	Q9H845	Acyl-CoA dehydrogenase family member 9, mitochondrial OS=Homo sapiens GN=ACAD9 PE=1 SV=1	1	4	3	4	6.17741	2.92161	21.9206	15.7359	1.08745e-07	5.64674e-07	8.5192	0.987636	1	1	WT - Control	limma	1.08745e-07	5.64674e-07	TRUE	hit	6.17741
457	UGGT2	Q9NYU1	UDP-glucose:glycoprotein glucosyltransferase 2 OS=Homo sapiens GN=UGGT2 PE=1 SV=4	1	4	3	18	7.13158	3.90807	23.8684	15.7281	1.092e-07	5.65739e-07	8.51498	0.987642	1	1	WT - Control	limma	1.092e-07	5.65739e-07	TRUE	hit	7.13158
458	HERC2	O95714	E3 ubiquitin-protein ligase HERC2 OS=Homo sapiens GN=HERC2 PE=1 SV=2	1	4	3	4	5.67328	2.8737	20.7119	15.7135	1.10054e-07	5.68864e-07	8.50711	0.987653	1	1	WT - Control	limma	1.10054e-07	5.68864e-07	TRUE	hit	5.67328
459	ALDH1B1	A0A0U1RQK9|P30837	Aldehyde dehydrogenase X, mitochondrial (Fragment) OS=Homo sapiens GN=ALDH1B1 PE=1 SV=1|Aldehyde dehydrogenase X, mitochondrial OS=Homo sapiens GN=ALDH1B1 PE=1 SV=3	1	4	3	4	6.61538	3.31372	22.318	15.709	4.01007e-07	1.31007e-06	7.32975	0.987657	1	1	WT - Control	limma	4.01007e-07	1.31007e-06	TRUE	hit	6.61538
460	KLHL26	Q53HC5	Kelch-like protein 26 OS=Homo sapiens GN=KLHL26 PE=1 SV=2	1	4	3	2	6.22141	3.43607	20.6353	15.7011	1.10792e-07	5.70074e-07	8.50036	0.987663	1	1	WT - Control	limma	1.10792e-07	5.70074e-07	TRUE	hit	6.22141
461	ZNF574	A0A0C4DFM2|Q6ZN55|Q6ZN55-2	HCG1643764, isoform CRA_b OS=Homo sapiens GN=ZNF574 PE=1 SV=1|Zinc finger protein 574 OS=Homo sapiens GN=ZNF574 PE=1 SV=2|Isoform 2 of Zinc finger protein 574 OS=Homo sapiens GN=ZNF574	1	4	3	3	6.00119	3.13692	20.4645	15.69	1.11452e-07	5.72168e-07	8.49437	0.987672	1	1	WT - Control	limma	1.11452e-07	5.72168e-07	TRUE	hit	6.00119
462	MICA	A0A024RCL3|Q96QC4	MHC class I polypeptide-related sequence A OS=Homo sapiens GN=MICA PE=1 SV=1|MHC class I polypeptide-related sequence A OS=Homo sapiens GN=MICA PE=1 SV=1	1	4	3	3	5.86301	3.05239	20.1538	15.6842	1.11802e-07	5.72659e-07	8.4912	0.987677	1	1	WT - Control	limma	1.11802e-07	5.72659e-07	TRUE	hit	5.86301
463	YME1L1	Q96TA2|Q96TA2-2|Q96TA2-3	ATP-dependent zinc metalloprotease YME1L1 OS=Homo sapiens GN=YME1L1 PE=1 SV=2|Isoform 2 of ATP-dependent zinc metalloprotease YME1L1 OS=Homo sapiens GN=YME1L1|Isoform 3 of ATP-dependent zinc metalloprotease YME1L1 OS=Homo sapiens GN=YME1L1	1	4	3	9	6.59334	4.07446	23.3493	15.68	1.12053e-07	5.72659e-07	8.48893	0.98768	1	1	WT - Control	limma	1.12053e-07	5.72659e-07	TRUE	hit	6.59334
464	DTWD2	D6RBD8|Q8NBA8	DTW domain-containing protein 2 OS=Homo sapiens GN=DTWD2 PE=1 SV=1|DTW domain-containing protein 2 OS=Homo sapiens GN=DTWD2 PE=1 SV=1	1	4	3	2	6.43351	3.51385	20.7954	15.6765	4.07284e-07	1.32675e-06	7.3145	0.987683	1	1	WT - Control	limma	4.07284e-07	1.32675e-06	TRUE	hit	6.43351
465	RFC1	P35251|P35251-2	Replication factor C subunit 1 OS=Homo sapiens GN=RFC1 PE=1 SV=4|Isoform 2 of Replication factor C subunit 1 OS=Homo sapiens GN=RFC1	1	4	3	6	6.52242	3.22056	22.9389	15.6458	1.14134e-07	5.79739e-07	8.47034	0.987707	1	1	WT - Control	limma	1.14134e-07	5.79739e-07	TRUE	hit	6.52242
466	MCM10	Q5T670|Q7L590|Q7L590-2	MCM10 minichromosome maintenance deficient 10 (S. cerevisiae), isoform CRA_b OS=Homo sapiens GN=MCM10 PE=1 SV=1|Protein MCM10 homolog OS=Homo sapiens GN=MCM10 PE=1 SV=2|Isoform 2 of Protein MCM10 homolog OS=Homo sapiens GN=MCM10	1	4	3	5	5.77545	3.54091	21.0657	15.6393	4.14583e-07	1.34088e-06	7.29705	0.987712	1	1	WT - Control	limma	4.14583e-07	1.34088e-06	TRUE	hit	5.77545
467	SDHA	P31040|P31040-2	Succinate dehydrogenase [ubiquinone] flavoprotein subunit, mitochondrial OS=Homo sapiens GN=SDHA PE=1 SV=2|Isoform 2 of Succinate dehydrogenase [ubiquinone] flavoprotein subunit, mitochondrial OS=Homo sapiens GN=SDHA	1	4	3	8	7.14988	3.00369	23.7378	15.6332	1.14914e-07	5.79739e-07	8.46346	0.987717	1	1	WT - Control	limma	1.14914e-07	5.79739e-07	TRUE	hit	7.14988
468	PYCR2	A0A087WTV6|Q96C36	Pyrroline-5-carboxylate reductase 2 OS=Homo sapiens GN=PYCR2 PE=1 SV=1|Pyrroline-5-carboxylate reductase 2 OS=Homo sapiens GN=PYCR2 PE=1 SV=1	1	4	3	3	6.70266	3.32978	22.1823	15.6323	1.1497e-07	5.79739e-07	8.46297	0.987717	1	1	WT - Control	limma	1.1497e-07	5.79739e-07	TRUE	hit	6.70266
469	IPO11	F8WDV0|Q9UI26|Q9UI26-2	Importin-11 OS=Homo sapiens GN=IPO11 PE=1 SV=1|Importin-11 OS=Homo sapiens GN=IPO11 PE=1 SV=1|Isoform 2 of Importin-11 OS=Homo sapiens GN=IPO11	1	4	3	5	6.33021	2.96416	21.6541	15.6322	1.14972e-07	5.79739e-07	8.46295	0.987717	1	1	WT - Control	limma	1.14972e-07	5.79739e-07	TRUE	hit	6.33021
470	IMMT	C9J406|Q16891-2|Q16891-4	MICOS complex subunit MIC60 OS=Homo sapiens GN=IMMT PE=1 SV=1|Isoform 2 of MICOS complex subunit MIC60 OS=Homo sapiens GN=IMMT|Isoform 4 of MICOS complex subunit MIC60 OS=Homo sapiens GN=IMMT	1	4	3	10	6.58233	3.93944	23.1426	15.6294	1.15145e-07	5.79739e-07	8.46143	0.98772	1	1	WT - Control	limma	1.15145e-07	5.79739e-07	TRUE	hit	6.58233
471	XPO1	O14980	Exportin-1 OS=Homo sapiens GN=XPO1 PE=1 SV=1	1	4	3	8	6.76158	3.58335	21.3971	15.6037	1.16756e-07	5.83995e-07	8.44738	0.98774	1	1	WT - Control	limma	1.16756e-07	5.83995e-07	TRUE	hit	6.76158
472	CCNT1	O60563	Cyclin-T1 OS=Homo sapiens GN=CCNT1 PE=1 SV=1	1	4	3	5	6.06344	2.7815	22.0687	15.6002	1.16979e-07	5.83995e-07	8.44546	0.987743	1	1	WT - Control	limma	1.16979e-07	5.83995e-07	TRUE	hit	6.06344
473	NT5C3A	Q9H0P0|Q9H0P0-1|Q9H0P0-2|Q9H0P0-3|X6RM59	Cytosolic 5'-nucleotidase 3A OS=Homo sapiens GN=NT5C3A PE=1 SV=3|Isoform 1 of Cytosolic 5'-nucleotidase 3A OS=Homo sapiens GN=NT5C3A|Isoform 3 of Cytosolic 5'-nucleotidase 3A OS=Homo sapiens GN=NT5C3A|Isoform 4 of Cytosolic 5'-nucleotidase 3A OS=Homo sapiens GN=NT5C3A|5'-nucleotidase OS=Homo sapiens GN=NT5C3A PE=1 SV=1	1	4	3	2	6.18133	3.54323	20.1385	15.5999	1.16993e-07	5.83995e-07	8.44533	0.987743	1	1	WT - Control	limma	1.16993e-07	5.83995e-07	TRUE	hit	6.18133
474	SRCAP|A0A0C4DFX4	A0A087X0E3|A0A0A0MS59|A0A0C4DFX4|Q6ZRS2|Q6ZRS2-2|Q6ZRS2-3	Helicase SRCAP (Fragment) OS=Homo sapiens GN=SRCAP PE=1 SV=1|Helicase SRCAP OS=Homo sapiens GN=SRCAP PE=1 SV=1|Uncharacterized protein (Fragment) OS=Homo sapiens PE=4 SV=1|Helicase SRCAP OS=Homo sapiens GN=SRCAP PE=1 SV=3|Isoform 2 of Helicase SRCAP OS=Homo sapiens GN=SRCAP|Isoform 3 of Helicase SRCAP OS=Homo sapiens GN=SRCAP	1	4	3	4	5.89096	2.87897	20.7225	15.5981	1.17109e-07	5.83995e-07	8.44434	0.987744	1	1	WT - Control	limma	1.17109e-07	5.83995e-07	TRUE	hit	5.89096
475	RPN1	P04843	Dolichyl-diphosphooligosaccharide--protein glycosyltransferase subunit 1 OS=Homo sapiens GN=RPN1 PE=1 SV=1	1	4	3	18	7.3894	2.78321	25.3412	15.5829	1.18077e-07	5.87393e-07	8.43601	0.987756	1	1	WT - Control	limma	1.18077e-07	5.87393e-07	TRUE	hit	7.3894
476	UQCR10	Q9UDW1	Cytochrome b-c1 complex subunit 9 OS=Homo sapiens GN=UQCR10 PE=1 SV=3	1	4	3	2	6.45433	3.48124	21.3187	15.5792	1.18309e-07	5.87393e-07	8.43403	0.987759	1	1	WT - Control	limma	1.18309e-07	5.87393e-07	TRUE	hit	6.45433
477	GALNT1	Q10472	Polypeptide N-acetylgalactosaminyltransferase 1 OS=Homo sapiens GN=GALNT1 PE=1 SV=1	1	4	3	2	5.8706	3.12094	20.5247	15.5727	1.18728e-07	5.88183e-07	8.43045	0.987764	1	1	WT - Control	limma	1.18728e-07	5.88183e-07	TRUE	hit	5.8706
478	CST3	P01034	Cystatin-C OS=Homo sapiens GN=CST3 PE=1 SV=1	1	4	3	2	6.04817	3.2182	20.9263	15.5589	1.19621e-07	5.90214e-07	8.42287	0.987775	1	1	WT - Control	limma	1.19621e-07	5.90214e-07	TRUE	hit	6.04817
479	ATG2B	Q96BY7	Autophagy-related protein 2 homolog B OS=Homo sapiens GN=ATG2B PE=1 SV=5	1	4	3	4	5.7098	3.22268	20.2634	15.5551	1.19861e-07	5.90214e-07	8.42084	0.987778	1	1	WT - Control	limma	1.19861e-07	5.90214e-07	TRUE	hit	5.7098
480	TUBG1	P23258	Tubulin gamma-1 chain OS=Homo sapiens GN=TUBG1 PE=1 SV=2	1	4	3	7	6.8895	3.24337	21.8275	15.5542	1.1992e-07	5.90214e-07	8.42035	0.987779	1	1	WT - Control	limma	1.1992e-07	5.90214e-07	TRUE	hit	6.8895
481	SRPRA	P08240	Signal recognition particle receptor subunit alpha OS=Homo sapiens GN=SRPRA PE=1 SV=2	1	4	3	7	6.24889	3.53353	22.065	15.5414	1.20758e-07	5.93049e-07	8.4133	0.987789	1	1	WT - Control	limma	1.20758e-07	5.93049e-07	TRUE	hit	6.24889
482	URB2	Q14146	Unhealthy ribosome biogenesis protein 2 homolog OS=Homo sapiens GN=URB2 PE=2 SV=2	1	4	3	2	5.96824	3.07664	20.0065	15.5203	1.22147e-07	5.98573e-07	8.40173	0.987805	1	1	WT - Control	limma	1.22147e-07	5.98573e-07	TRUE	hit	5.96824
483	SMAP2	A0A087WV97|Q8WU79|Q8WU79-2|Q8WU79-3	Stromal membrane-associated protein 2 OS=Homo sapiens GN=SMAP2 PE=1 SV=1|Stromal membrane-associated protein 2 OS=Homo sapiens GN=SMAP2 PE=1 SV=1|Isoform 2 of Stromal membrane-associated protein 2 OS=Homo sapiens GN=SMAP2|Isoform 3 of Stromal membrane-associated protein 2 OS=Homo sapiens GN=SMAP2	1	4	3	2	5.61257	3.74127	20.3907	15.5171	4.39662e-07	1.40218e-06	7.23927	0.987808	1	1	WT - Control	limma	4.39662e-07	1.40218e-06	TRUE	hit	5.61257
484	CNNM2	Q9H8M5|Q9H8M5-2	Metal transporter CNNM2 OS=Homo sapiens GN=CNNM2 PE=1 SV=2|Isoform 2 of Metal transporter CNNM2 OS=Homo sapiens GN=CNNM2	1	4	3	3	5.74489	3.49447	20.5222	15.5093	4.41311e-07	1.40524e-06	7.23558	0.987814	1	1	WT - Control	limma	4.41311e-07	1.40524e-06	TRUE	hit	5.74489
485	RBM39	Q14498|Q14498-2	RNA-binding protein 39 OS=Homo sapiens GN=RBM39 PE=1 SV=2|Isoform 2 of RNA-binding protein 39 OS=Homo sapiens GN=RBM39	1	4	3	9	7.144	3.25155	23.7973	15.5087	1.22917e-07	6.01047e-07	8.39537	0.987814	1	1	WT - Control	limma	1.22917e-07	6.01047e-07	TRUE	hit	7.144
486	WDR55	Q9H6Y2	WD repeat-containing protein 55 OS=Homo sapiens GN=WDR55 PE=1 SV=2	1	4	3	4	6.19664	2.69051	20.9385	15.504	1.23232e-07	6.01288e-07	8.39278	0.987818	1	1	WT - Control	limma	1.23232e-07	6.01288e-07	TRUE	hit	6.19664
487	POLR2B	C9J2Y9|P30876	DNA-directed RNA polymerase subunit beta OS=Homo sapiens GN=POLR2B PE=1 SV=2|DNA-directed RNA polymerase II subunit RPB2 OS=Homo sapiens GN=POLR2B PE=1 SV=1	1	4	3	17	7.00541	3.46777	23.9779	15.4968	1.23716e-07	6.02349e-07	8.38882	0.987824	1	1	WT - Control	limma	1.23716e-07	6.02349e-07	TRUE	hit	7.00541
488	TTF2	Q9UNY4	Transcription termination factor 2 OS=Homo sapiens GN=TTF2 PE=1 SV=2	1	4	3	7	6.36709	2.75839	21.9273	15.4677	1.25686e-07	6.10628e-07	8.37283	0.987847	1	1	WT - Control	limma	1.25686e-07	6.10628e-07	TRUE	hit	6.36709
489	ASPH	Q12797|Q12797-10	Aspartyl/asparaginyl beta-hydroxylase OS=Homo sapiens GN=ASPH PE=1 SV=3|Isoform 10 of Aspartyl/asparaginyl beta-hydroxylase OS=Homo sapiens GN=ASPH	1	4	3	6	6.71218	4.19378	22.3677	15.46	1.2622e-07	6.1191e-07	8.36853	0.987853	1	1	WT - Control	limma	1.2622e-07	6.1191e-07	TRUE	hit	6.71218
490	AGPAT4	Q9NRZ5	1-acyl-sn-glycerol-3-phosphate acyltransferase delta OS=Homo sapiens GN=AGPAT4 PE=1 SV=1	1	4	3	5	6.51954	3.31737	21.7536	15.4514	1.26813e-07	6.13471e-07	8.36379	0.987859	1	1	WT - Control	limma	1.26813e-07	6.13471e-07	TRUE	hit	6.51954
491	SIMC1	F6R0L0	SUMO-interacting motif-containing protein 1 OS=Homo sapiens GN=SIMC1 PE=1 SV=1	1	4	3	3	6.18599	3.2098	21.5613	15.4382	1.27725e-07	6.16568e-07	8.35653	0.98787	1	1	WT - Control	limma	1.27725e-07	6.16568e-07	TRUE	hit	6.18599
492	CCDC47	Q96A33	Coiled-coil domain-containing protein 47 OS=Homo sapiens GN=CCDC47 PE=1 SV=1	1	4	3	6	7.05102	4.67214	22.5929	15.426	1.28579e-07	6.18212e-07	8.34978	0.987879	1	1	WT - Control	limma	1.28579e-07	6.18212e-07	TRUE	hit	7.05102
493	RHEB	Q15382	GTP-binding protein Rheb OS=Homo sapiens GN=RHEB PE=1 SV=1	1	4	3	4	6.34815	3.77358	21.8789	15.4222	1.28846e-07	6.18212e-07	8.34768	0.987882	1	1	WT - Control	limma	1.28846e-07	6.18212e-07	TRUE	hit	6.34815
494	WDFY3	Q8IZQ1|Q8IZQ1-2	WD repeat and FYVE domain-containing protein 3 OS=Homo sapiens GN=WDFY3 PE=1 SV=2|Isoform 2 of WD repeat and FYVE domain-containing protein 3 OS=Homo sapiens GN=WDFY3	1	4	3	12	6.14584	3.86588	22.5121	15.4165	1.29249e-07	6.18212e-07	8.34452	0.987887	1	1	WT - Control	limma	1.29249e-07	6.18212e-07	TRUE	hit	6.14584
495	CEP170	Q5SW79	Centrosomal protein of 170 kDa OS=Homo sapiens GN=CEP170 PE=1 SV=1	1	4	3	11	6.28418	2.6565	22.7233	15.4159	1.29292e-07	6.18212e-07	8.34418	0.987887	1	1	WT - Control	limma	1.29292e-07	6.18212e-07	TRUE	hit	6.28418
496	IGF2R	P11717	Cation-independent mannose-6-phosphate receptor OS=Homo sapiens GN=IGF2R PE=1 SV=3	1	4	3	12	6.51788	4.39149	22.8183	15.4139	1.29431e-07	6.18212e-07	8.34309	0.987889	1	1	WT - Control	limma	1.29431e-07	6.18212e-07	TRUE	hit	6.51788
497	SLC25A15	Q5VZD9|Q9Y619	Mitochondrial ornithine transporter 1 (Fragment) OS=Homo sapiens GN=SLC25A15 PE=1 SV=1|Mitochondrial ornithine transporter 1 OS=Homo sapiens GN=SLC25A15 PE=1 SV=1	1	4	3	2	6.83665	3.74532	21.9134	15.3953	4.66352e-07	1.46033e-06	7.18118	0.987904	1	1	WT - Control	limma	4.66352e-07	1.46033e-06	TRUE	hit	6.83665
498	ZMYM4	Q5VZL5|Q5VZL5-4	Zinc finger MYM-type protein 4 OS=Homo sapiens GN=ZMYM4 PE=1 SV=1|Isoform 4 of Zinc finger MYM-type protein 4 OS=Homo sapiens GN=ZMYM4	1	4	3	15	6.80386	3.55426	23.3276	15.392	1.30986e-07	6.23514e-07	8.33099	0.987906	1	1	WT - Control	limma	1.30986e-07	6.23514e-07	TRUE	hit	6.80386
499	PTPN1	P18031	Tyrosine-protein phosphatase non-receptor type 1 OS=Homo sapiens GN=PTPN1 PE=1 SV=1	1	4	3	10	6.8253	3.98943	23.1507	15.3906	1.31092e-07	6.23514e-07	8.33017	0.987907	1	1	WT - Control	limma	1.31092e-07	6.23514e-07	TRUE	hit	6.8253
500	CYBA	P13498	Cytochrome b-245 light chain OS=Homo sapiens GN=CYBA PE=1 SV=3	1	4	3	2	6.60732	3.85827	21.2913	15.3801	4.69814e-07	1.46914e-06	7.13635	0.987915	1	1	WT - Control	limma	4.69814e-07	1.46914e-06	TRUE	hit	6.60732
501	EFTUD2	Q15029|Q15029-2|Q15029-3	116 kDa U5 small nuclear ribonucleoprotein component OS=Homo sapiens GN=EFTUD2 PE=1 SV=1|Isoform 2 of 116 kDa U5 small nuclear ribonucleoprotein component OS=Homo sapiens GN=EFTUD2|Isoform 3 of 116 kDa U5 small nuclear ribonucleoprotein component OS=Homo sapiens GN=EFTUD2	1	4	3	11	6.94411	2.89414	23.0245	15.376	1.32139e-07	6.27176e-07	8.32211	0.987919	1	1	WT - Control	limma	1.32139e-07	6.27176e-07	TRUE	hit	6.94411
502	ENTPD6	H0Y6Q1|O75354|O75354-2|O75354-3|Q5QPI9	Ectonucleoside triphosphate diphosphohydrolase 6 (Fragment) OS=Homo sapiens GN=ENTPD6 PE=1 SV=1|Ectonucleoside triphosphate diphosphohydrolase 6 OS=Homo sapiens GN=ENTPD6 PE=1 SV=3|Isoform 2 of Ectonucleoside triphosphate diphosphohydrolase 6 OS=Homo sapiens GN=ENTPD6|Isoform 3 of Ectonucleoside triphosphate diphosphohydrolase 6 OS=Homo sapiens GN=ENTPD6|Ectonucleoside triphosphate diphosphohydro…	1	4	3	2	6.39841	4.12182	20.8226	15.3667	1.32813e-07	6.29055e-07	8.31696	0.987926	1	1	WT - Control	limma	1.32813e-07	6.29055e-07	TRUE	hit	6.39841
503	GTF3C3	Q9Y5Q9	General transcription factor 3C polypeptide 3 OS=Homo sapiens GN=GTF3C3 PE=1 SV=1	1	4	3	8	6.58043	2.92287	22.3082	15.3577	1.33474e-07	6.30868e-07	8.31192	0.987933	1	1	WT - Control	limma	1.33474e-07	6.30868e-07	TRUE	hit	6.58043
504	HSD17B7	P56937|P56937-2|P56937-3	3-keto-steroid reductase OS=Homo sapiens GN=HSD17B7 PE=1 SV=1|Isoform 2 of 3-keto-steroid reductase OS=Homo sapiens GN=HSD17B7|Isoform 3 of 3-keto-steroid reductase OS=Homo sapiens GN=HSD17B7	1	4	3	2	5.74672	2.94823	20.5606	15.3504	1.3401e-07	6.32081e-07	8.30786	0.987939	1	1	WT - Control	limma	1.3401e-07	6.32081e-07	TRUE	hit	5.74672
505	ACOT8	H7C5A7|O14734	Acyl-coenzyme A thioesterase 8 (Fragment) OS=Homo sapiens GN=ACOT8 PE=1 SV=1|Acyl-coenzyme A thioesterase 8 OS=Homo sapiens GN=ACOT8 PE=1 SV=1	1	4	3	3	6.4539	3.40829	21.0569	15.3384	1.34894e-07	6.33882e-07	8.30119	0.987948	1	1	WT - Control	limma	1.34894e-07	6.33882e-07	TRUE	hit	6.4539
506	TUBB	P07437	Tubulin beta chain OS=Homo sapiens GN=TUBB PE=1 SV=2	1	4	3	4	7.44001	2.85428	25.0984	15.3373	1.3497e-07	6.33882e-07	8.30063	0.987949	1	1	WT - Control	limma	1.3497e-07	6.33882e-07	TRUE	hit	7.44001
507	TNPO3	E9PFH4|Q9Y5L0|Q9Y5L0-3	Transportin-3 OS=Homo sapiens GN=TNPO3 PE=1 SV=1|Transportin-3 OS=Homo sapiens GN=TNPO3 PE=1 SV=3|Isoform 3 of Transportin-3 OS=Homo sapiens GN=TNPO3	1	4	3	8	6.61101	3.42283	22.0012	15.333	1.35293e-07	6.33882e-07	8.2982	0.987952	1	1	WT - Control	limma	1.35293e-07	6.33882e-07	TRUE	hit	6.61101
508	ARL5B	Q96KC2	ADP-ribosylation factor-like protein 5B OS=Homo sapiens GN=ARL5B PE=1 SV=1	1	4	3	2	6.34946	3.34712	21.4111	15.33	1.35512e-07	6.33882e-07	8.29656	0.987955	1	1	WT - Control	limma	1.35512e-07	6.33882e-07	TRUE	hit	6.34946
509	TXNDC16	Q9P2K2	Thioredoxin domain-containing protein 16 OS=Homo sapiens GN=TXNDC16 PE=2 SV=4	1	4	3	3	6.14992	3.72128	21.3386	15.327	4.82119e-07	1.48911e-06	7.11208	0.987957	1	1	WT - Control	limma	4.82119e-07	1.48911e-06	TRUE	hit	6.14992
510	NCLN	Q969V3|Q969V3-2	Nicalin OS=Homo sapiens GN=NCLN PE=1 SV=2|Isoform 2 of Nicalin OS=Homo sapiens GN=NCLN	1	4	3	6	6.50422	3.27548	21.8141	15.2969	1.37999e-07	6.4371e-07	8.27812	0.987981	1	1	WT - Control	limma	1.37999e-07	6.4371e-07	TRUE	hit	6.50422
511	ADAR	P55265|P55265-4|P55265-5	Double-stranded RNA-specific adenosine deaminase OS=Homo sapiens GN=ADAR PE=1 SV=4|Isoform 4 of Double-stranded RNA-specific adenosine deaminase OS=Homo sapiens GN=ADAR|Isoform 5 of Double-stranded RNA-specific adenosine deaminase OS=Homo sapiens GN=ADAR	1	4	3	11	6.80264	3.03724	23.9567	15.2945	1.38182e-07	6.4371e-07	8.27678	0.987983	1	1	WT - Control	limma	1.38182e-07	6.4371e-07	TRUE	hit	6.80264
512	NUP160	G3V198|Q12769	Nuclear pore complex protein Nup160 (Fragment) OS=Homo sapiens GN=NUP160 PE=1 SV=2|Nuclear pore complex protein Nup160 OS=Homo sapiens GN=NUP160 PE=1 SV=3	1	4	3	7	6.46221	3.75151	22.5159	15.2772	1.39505e-07	6.4854e-07	8.26711	0.987996	1	1	WT - Control	limma	1.39505e-07	6.4854e-07	TRUE	hit	6.46221
513	C3ORF33	Q6P1S2|Q6P1S2-2	Protein C3orf33 OS=Homo sapiens GN=C3orf33 PE=1 SV=2|Isoform 2 of Protein C3orf33 OS=Homo sapiens GN=C3orf33	1	4	3	2	5.58017	2.78401	20.4342	15.262	1.40677e-07	6.52216e-07	8.25862	0.988008	1	1	WT - Control	limma	1.40677e-07	6.52216e-07	TRUE	hit	5.58017
514	ZC3H18	E7ERS3|Q86VM9	Zinc finger CCCH domain-containing protein 18 OS=Homo sapiens GN=ZC3H18 PE=1 SV=1|Zinc finger CCCH domain-containing protein 18 OS=Homo sapiens GN=ZC3H18 PE=1 SV=2	1	4	3	5	6.36898	3.09799	21.6825	15.2595	1.40872e-07	6.52216e-07	8.25722	0.98801	1	1	WT - Control	limma	1.40872e-07	6.52216e-07	TRUE	hit	6.36898
515	FAT1	A0A087WVP1|Q14517	Protocadherin Fat 1 OS=Homo sapiens GN=FAT1 PE=1 SV=1|Protocadherin Fat 1 OS=Homo sapiens GN=FAT1 PE=1 SV=2	1	4	3	8	6.32714	3.74795	22.3887	15.253	1.41383e-07	6.53248e-07	8.25354	0.988015	1	1	WT - Control	limma	1.41383e-07	6.53248e-07	TRUE	hit	6.32714
516	DYNC2H1	Q8NCM8|Q8NCM8-2	Cytoplasmic dynein 2 heavy chain 1 OS=Homo sapiens GN=DYNC2H1 PE=1 SV=4|Isoform 2 of Cytoplasmic dynein 2 heavy chain 1 OS=Homo sapiens GN=DYNC2H1	1	4	3	4	5.64576	2.94444	20.7639	15.2386	1.42511e-07	6.57118e-07	8.24548	0.988027	1	1	WT - Control	limma	1.42511e-07	6.57118e-07	TRUE	hit	5.64576
517	PRKAG1	F8VYY9|P54619|P54619-2|P54619-3	5'-AMP-activated protein kinase subunit gamma-1 OS=Homo sapiens GN=PRKAG1 PE=1 SV=1|5'-AMP-activated protein kinase subunit gamma-1 OS=Homo sapiens GN=PRKAG1 PE=1 SV=1|Isoform 2 of 5'-AMP-activated protein kinase subunit gamma-1 OS=Homo sapiens GN=PRKAG1|Isoform 3 of 5'-AMP-activated protein kinase subunit gamma-1 OS=Homo sapiens GN=PRKAG1	1	4	3	5	6.17095	3.04629	21.4177	15.2335	1.42907e-07	6.57604e-07	8.24266	0.988031	1	1	WT - Control	limma	1.42907e-07	6.57604e-07	TRUE	hit	6.17095
518	DYNC1H1	Q14204	Cytoplasmic dynein 1 heavy chain 1 OS=Homo sapiens GN=DYNC1H1 PE=1 SV=5	1	4	3	57	7.05221	2.627	25.8412	15.1843	1.46855e-07	6.72989e-07	8.215	0.988069	1	1	WT - Control	limma	1.46855e-07	6.72989e-07	TRUE	hit	7.05221
519	CUX1	P39880-3	Isoform 3 of Homeobox protein cut-like 1 OS=Homo sapiens GN=CUX1	1	4	3	4	6.0352	2.66907	21.7015	15.1807	1.47142e-07	6.72989e-07	8.21301	0.988072	1	1	WT - Control	limma	1.47142e-07	6.72989e-07	TRUE	hit	6.0352
520	PUM1	H0YEH2|Q14671	Pumilio homolog 1 (Fragment) OS=Homo sapiens GN=PUM1 PE=1 SV=1|Pumilio homolog 1 OS=Homo sapiens GN=PUM1 PE=1 SV=3	1	4	3	7	6.26115	3.51507	21.8571	15.1706	1.4797e-07	6.74312e-07	8.20732	0.98808	1	1	WT - Control	limma	1.4797e-07	6.74312e-07	TRUE	hit	6.26115
521	AASS	Q9UDR5	Alpha-aminoadipic semialdehyde synthase, mitochondrial OS=Homo sapiens GN=AASS PE=1 SV=1	1	4	3	10	6.97574	5.38425	23.1221	15.1699	1.48027e-07	6.74312e-07	8.20692	0.988081	1	1	WT - Control	limma	1.48027e-07	6.74312e-07	TRUE	hit	6.97574
522	ZW10	O43264	Centromere/kinetochore protein zw10 homolog OS=Homo sapiens GN=ZW10 PE=1 SV=3	1	4	3	5	6.11123	3.98733	21.166	15.1561	1.49168e-07	6.78066e-07	8.19913	0.988091	1	1	WT - Control	limma	1.49168e-07	6.78066e-07	TRUE	hit	6.11123
523	CACHD1	A0A0A0MQY7|Q5VU97	VWFA and cache domain-containing protein 1 OS=Homo sapiens GN=CACHD1 PE=1 SV=1|VWFA and cache domain-containing protein 1 OS=Homo sapiens GN=CACHD1 PE=2 SV=2	1	4	3	6	6.00881	4.19927	21.7535	15.1527	1.4945e-07	6.78066e-07	8.19721	0.988094	1	1	WT - Control	limma	1.4945e-07	6.78066e-07	TRUE	hit	6.00881
524	OBSL1	A6NN50|O75147|O75147-1|O75147-2|O75147-4	Obscurin-like protein 1 OS=Homo sapiens GN=OBSL1 PE=1 SV=1|Obscurin-like protein 1 OS=Homo sapiens GN=OBSL1 PE=1 SV=4|Isoform 3 of Obscurin-like protein 1 OS=Homo sapiens GN=OBSL1|Isoform 2 of Obscurin-like protein 1 OS=Homo sapiens GN=OBSL1|Isoform 4 of Obscurin-like protein 1 OS=Homo sapiens GN=OBSL1	1	4	3	4	6.12816	3.41309	20.9263	15.1453	1.50064e-07	6.79057e-07	8.19304	0.9881	1	1	WT - Control	limma	1.50064e-07	6.79057e-07	TRUE	hit	6.12816
525	SMARCAD1	Q9H4L7|Q9H4L7-2	SWI/SNF-related matrix-associated actin-dependent regulator of chromatin subfamily A containing DEAD/H box 1 OS=Homo sapiens GN=SMARCAD1 PE=1 SV=2|Isoform 2 of SWI/SNF-related matrix-associated actin-dependent regulator of chromatin subfamily A containing DEAD/H box 1 OS=Homo sapiens GN=SMARCAD1	1	4	3	3	5.72067	2.90405	21.165	15.1428	1.50268e-07	6.79057e-07	8.19166	0.988102	1	1	WT - Control	limma	1.50268e-07	6.79057e-07	TRUE	hit	5.72067
526	EIF2B4	A0A087WW69|E7ERK9|F8W8L6|Q9UI10|Q9UI10-2|Q9UI10-3	Translation initiation factor eIF-2B subunit delta OS=Homo sapiens GN=EIF2B4 PE=1 SV=1|Translation initiation factor eIF-2B subunit delta OS=Homo sapiens GN=EIF2B4 PE=1 SV=1|Eukaryotic translation initiation factor 2B subunit 4 delta transcript variant 4 OS=Homo sapiens GN=EIF2B4 PE=1 SV=1|Translation initiation factor eIF-2B subunit delta OS=Homo sapiens GN=EIF2B4 PE=1 SV=2|Isoform 2 of Translat…	1	4	3	4	6.5887	3.73116	21.3625	15.1302	1.51322e-07	6.82397e-07	8.18456	0.988112	1	1	WT - Control	limma	1.51322e-07	6.82397e-07	TRUE	hit	6.5887
527	LRRC41	A0A087WTU1|A0A0B4J2G4|A0A0C4DH00|Q15345|Q15345-3	Leucine-rich repeat-containing protein 41 OS=Homo sapiens GN=LRRC41 PE=1 SV=1|Leucine-rich repeat-containing protein 41 OS=Homo sapiens GN=LRRC41 PE=1 SV=1|Leucine-rich repeat-containing protein 41 OS=Homo sapiens GN=LRRC41 PE=1 SV=1|Leucine-rich repeat-containing protein 41 OS=Homo sapiens GN=LRRC41 PE=1 SV=3|Isoform 3 of Leucine-rich repeat-containing protein 41 OS=Homo sapiens GN=LRRC41	1	4	3	6	6.18288	3.30432	21.9626	15.1245	1.51805e-07	6.82397e-07	8.18132	0.988116	1	1	WT - Control	limma	1.51805e-07	6.82397e-07	TRUE	hit	6.18288
528	SDF2L1	Q9HCN8	Stromal cell-derived factor 2-like protein 1 OS=Homo sapiens GN=SDF2L1 PE=1 SV=2	1	4	3	4	7.02114	4.10625	22.4877	15.1232	1.51912e-07	6.82397e-07	8.18061	0.988117	1	1	WT - Control	limma	1.51912e-07	6.82397e-07	TRUE	hit	7.02114
529	FBL	P22087	rRNA 2'-O-methyltransferase fibrillarin OS=Homo sapiens GN=FBL PE=1 SV=2	1	4	3	9	7.22505	2.57262	23.2903	15.1092	1.53106e-07	6.86399e-07	8.17265	0.988128	1	1	WT - Control	limma	1.53106e-07	6.86399e-07	TRUE	hit	7.22505
530	PHKA2	P46019	Phosphorylase b kinase regulatory subunit alpha, liver isoform OS=Homo sapiens GN=PHKA2 PE=1 SV=1	1	4	3	4	5.96107	3.0138	20.3444	15.0732	1.56203e-07	6.97964e-07	8.1523	0.988157	1	1	WT - Control	limma	1.56203e-07	6.97964e-07	TRUE	hit	5.96107
531	DHX37	Q8IY37	Probable ATP-dependent RNA helicase DHX37 OS=Homo sapiens GN=DHX37 PE=1 SV=1	1	4	3	4	6.1407	2.65909	21.2994	15.0705	1.56439e-07	6.97964e-07	8.15076	0.988159	1	1	WT - Control	limma	1.56439e-07	6.97964e-07	TRUE	hit	6.1407
532	GRWD1	Q9BQ67	Glutamate-rich WD repeat-containing protein 1 OS=Homo sapiens GN=GRWD1 PE=1 SV=1	1	4	3	2	5.63625	2.59861	21.2202	15.0217	1.60766e-07	7.15078e-07	8.12302	0.988197	1	1	WT - Control	limma	1.60766e-07	7.15078e-07	TRUE	hit	5.63625
533	PIGG	E7EM50|Q5H8A4|Q5H8A4-2|Q5H8A4-4	GPI ethanolamine phosphate transferase 2 OS=Homo sapiens GN=PIGG PE=1 SV=1|GPI ethanolamine phosphate transferase 2 OS=Homo sapiens GN=PIGG PE=1 SV=1|Isoform 2 of GPI ethanolamine phosphate transferase 2 OS=Homo sapiens GN=PIGG|Isoform 4 of GPI ethanolamine phosphate transferase 2 OS=Homo sapiens GN=PIGG	1	4	3	2	6.18603	3.65883	20.3368	15.0053	1.62245e-07	7.2024e-07	8.1137	0.98821	1	1	WT - Control	limma	1.62245e-07	7.2024e-07	TRUE	hit	6.18603
534	SLC3A2	F5GZS6|J3KPF3|P08195|P08195-2|P08195-3|P08195-4	4F2 cell-surface antigen heavy chain OS=Homo sapiens GN=SLC3A2 PE=1 SV=1|4F2 cell-surface antigen heavy chain OS=Homo sapiens GN=SLC3A2 PE=1 SV=1|4F2 cell-surface antigen heavy chain OS=Homo sapiens GN=SLC3A2 PE=1 SV=3|Isoform 2 of 4F2 cell-surface antigen heavy chain OS=Homo sapiens GN=SLC3A2|Isoform 3 of 4F2 cell-surface antigen heavy chain OS=Homo sapiens GN=SLC3A2|Isoform 4 of 4F2 cell-surfac…	1	4	3	5	6.92997	4.41923	22.1435	14.9811	1.64461e-07	7.28649e-07	8.0999	0.988229	1	1	WT - Control	limma	1.64461e-07	7.28649e-07	TRUE	hit	6.92997
535	CEBPZ	A0A087X1N2|Q03701	CCAAT/enhancer-binding protein zeta OS=Homo sapiens GN=CEBPZ PE=1 SV=1|CCAAT/enhancer-binding protein zeta OS=Homo sapiens GN=CEBPZ PE=1 SV=3	1	4	3	6	6.13429	3.28952	21.6259	14.9709	1.65405e-07	7.29975e-07	8.09407	0.988237	1	1	WT - Control	limma	1.65405e-07	7.29975e-07	TRUE	hit	6.13429
536	PTCD2	F6S289|Q8WV60|Q8WV60-2|Q8WV60-3	Pentatricopeptide repeat-containing protein 2, mitochondrial OS=Homo sapiens GN=PTCD2 PE=1 SV=1|Pentatricopeptide repeat-containing protein 2, mitochondrial OS=Homo sapiens GN=PTCD2 PE=1 SV=3|Isoform 2 of Pentatricopeptide repeat-containing protein 2, mitochondrial OS=Homo sapiens GN=PTCD2|Isoform 3 of Pentatricopeptide repeat-containing protein 2, mitochondrial OS=Homo sapiens GN=PTCD2	1	4	3	3	6.11272	3.91683	20.9152	14.9637	5.76784e-07	1.70024e-06	6.97082	0.988243	1	1	WT - Control	limma	5.76784e-07	1.70024e-06	TRUE	hit	6.11272
537	SSBP1	A0A0G2JLD8|E7EUY5|Q04837	Single-stranded DNA-binding protein, mitochondrial (Fragment) OS=Homo sapiens GN=SSBP1 PE=1 SV=1|Single-stranded DNA-binding protein, mitochondrial (Fragment) OS=Homo sapiens GN=SSBP1 PE=1 SV=1|Single-stranded DNA-binding protein, mitochondrial OS=Homo sapiens GN=SSBP1 PE=1 SV=1	1	4	3	2	6.61211	2.86484	20.5263	14.9589	1.66524e-07	7.33205e-07	8.08721	0.988246	1	1	WT - Control	limma	1.66524e-07	7.33205e-07	TRUE	hit	6.61211
538	TMEM70	Q9BUB7|Q9BUB7-2	Transmembrane protein 70, mitochondrial OS=Homo sapiens GN=TMEM70 PE=1 SV=2|Isoform 2 of Transmembrane protein 70, mitochondrial OS=Homo sapiens GN=TMEM70	1	4	3	3	6.1485	3.66605	21.0073	14.9561	1.66785e-07	7.33205e-07	8.08562	0.988249	1	1	WT - Control	limma	1.66785e-07	7.33205e-07	TRUE	hit	6.1485
539	CTPS2	Q9NRF8	CTP synthase 2 OS=Homo sapiens GN=CTPS2 PE=1 SV=1	1	4	3	4	5.91622	3.57776	20.9245	14.9532	5.79799e-07	1.70255e-06	6.96564	0.988251	1	1	WT - Control	limma	5.79799e-07	1.70255e-06	TRUE	hit	5.91622
540	SDF2	Q99470	Stromal cell-derived factor 2 OS=Homo sapiens GN=SDF2 PE=1 SV=2	1	4	3	4	6.50927	4.06845	21.0758	14.9269	1.69546e-07	7.43898e-07	8.0689	0.988272	1	1	WT - Control	limma	1.69546e-07	7.43898e-07	TRUE	hit	6.50927
541	CPSF3	G5E9W3|Q9UKF6	Cleavage and polyadenylation specific factor 3, 73kDa, isoform CRA_b OS=Homo sapiens GN=CPSF3 PE=1 SV=1|Cleavage and polyadenylation specificity factor subunit 3 OS=Homo sapiens GN=CPSF3 PE=1 SV=1	1	4	3	4	6.40455	2.58514	21.3387	14.9214	1.70074e-07	7.44771e-07	8.06574	0.988276	1	1	WT - Control	limma	1.70074e-07	7.44771e-07	TRUE	hit	6.40455
542	UQCRC2	P22695	Cytochrome b-c1 complex subunit 2, mitochondrial OS=Homo sapiens GN=UQCRC2 PE=1 SV=3	1	4	3	8	6.51857	4.20985	22.0828	14.9159	1.70599e-07	7.45629e-07	8.0626	0.98828	1	1	WT - Control	limma	1.70599e-07	7.45629e-07	TRUE	hit	6.51857
543	ATXN10	Q9UBB4|Q9UBB4-2	Ataxin-10 OS=Homo sapiens GN=ATXN10 PE=1 SV=1|Isoform 2 of Ataxin-10 OS=Homo sapiens GN=ATXN10	1	4	3	7	6.7934	3.52517	22.6178	14.9081	1.71346e-07	7.47451e-07	8.05815	0.988286	1	1	WT - Control	limma	1.71346e-07	7.47451e-07	TRUE	hit	6.7934
544	ZNF724P	A8MTY0	Putative zinc finger protein 724 OS=Homo sapiens GN=ZNF724P PE=5 SV=3	1	4	3	3	6.27074	2.83519	21.0344	14.8923	1.72884e-07	7.52709e-07	8.04905	0.988299	1	1	WT - Control	limma	1.72884e-07	7.52709e-07	TRUE	hit	6.27074
545	COPA	P53621|P53621-2	Coatomer subunit alpha OS=Homo sapiens GN=COPA PE=1 SV=2|Isoform 2 of Coatomer subunit alpha OS=Homo sapiens GN=COPA	1	4	3	15	7.22521	3.90586	24.0903	14.8883	1.73277e-07	7.52974e-07	8.04673	0.988302	1	1	WT - Control	limma	1.73277e-07	7.52974e-07	TRUE	hit	7.22521
546	CERS2	H0YKH6|Q5SZE1|Q5SZE3|Q5SZE4|Q96G23	Ceramide synthase 2 (Fragment) OS=Homo sapiens GN=CERS2 PE=1 SV=7|Ceramide synthase 2 (Fragment) OS=Homo sapiens GN=CERS2 PE=1 SV=2|Ceramide synthase 2 (Fragment) OS=Homo sapiens GN=CERS2 PE=1 SV=1|Ceramide synthase 2 (Fragment) OS=Homo sapiens GN=CERS2 PE=1 SV=1|Ceramide synthase 2 OS=Homo sapiens GN=CERS2 PE=1 SV=1	1	4	3	2	6.44731	3.43603	21.122	14.8441	1.77651e-07	7.69875e-07	8.02134	0.988337	1	1	WT - Control	limma	1.77651e-07	7.69875e-07	TRUE	hit	6.44731
547	AAAS	Q9NRG9|Q9NRG9-2	Aladin OS=Homo sapiens GN=AAAS PE=1 SV=1|Isoform 2 of Aladin OS=Homo sapiens GN=AAAS	1	4	3	3	6.31309	3.12211	20.7959	14.8422	1.77846e-07	7.69875e-07	8.02022	0.988338	1	1	WT - Control	limma	1.77846e-07	7.69875e-07	TRUE	hit	6.31309
548	TM9SF2	Q99805	Transmembrane 9 superfamily member 2 OS=Homo sapiens GN=TM9SF2 PE=1 SV=1	1	4	3	5	6.47898	4.21401	21.5886	14.8334	1.78728e-07	7.72214e-07	8.01518	0.988345	1	1	WT - Control	limma	1.78728e-07	7.72214e-07	TRUE	hit	6.47898
549	DDOST	A0A0C4DGS1|P39656|P39656-3	Dolichyl-diphosphooligosaccharide--protein glycosyltransferase 48 kDa subunit OS=Homo sapiens GN=DDOST PE=1 SV=1|Dolichyl-diphosphooligosaccharide--protein glycosyltransferase 48 kDa subunit OS=Homo sapiens GN=DDOST PE=1 SV=4|Isoform 3 of Dolichyl-diphosphooligosaccharide--protein glycosyltransferase 48 kDa subunit OS=Homo sapiens GN=DDOST	1	4	3	3	6.38975	4.24	21.9309	14.8115	1.8096e-07	7.80367e-07	8.00253	0.988362	1	1	WT - Control	limma	1.8096e-07	7.80367e-07	TRUE	hit	6.38975
550	TSEN2	Q8NCE0|Q8NCE0-2|Q8NCE0-3|Q8NCE0-4|Q8NCE0-5	tRNA-splicing endonuclease subunit Sen2 OS=Homo sapiens GN=TSEN2 PE=1 SV=2|Isoform 2 of tRNA-splicing endonuclease subunit Sen2 OS=Homo sapiens GN=TSEN2|Isoform 3 of tRNA-splicing endonuclease subunit Sen2 OS=Homo sapiens GN=TSEN2|Isoform 4 of tRNA-splicing endonuclease subunit Sen2 OS=Homo sapiens GN=TSEN2|Isoform 5 of tRNA-splicing endonuclease subunit Sen2 OS=Homo sapiens GN=TSEN2	1	4	3	4	6.35161	2.59266	21.4702	14.8028	1.81858e-07	7.81439e-07	7.99748	0.988369	1	1	WT - Control	limma	1.81858e-07	7.81439e-07	TRUE	hit	6.35161
551	GOLGA5	Q8TBA6	Golgin subfamily A member 5 OS=Homo sapiens GN=GOLGA5 PE=1 SV=3	1	4	3	10	6.21036	6.06125	21.9748	14.7997	1.82176e-07	7.81439e-07	7.9957	0.988371	1	1	WT - Control	limma	1.82176e-07	7.81439e-07	TRUE	hit	6.21036
552	SLC25A36	Q96CQ1|Q96CQ1-3	Solute carrier family 25 member 36 OS=Homo sapiens GN=SLC25A36 PE=1 SV=1|Isoform 3 of Solute carrier family 25 member 36 OS=Homo sapiens GN=SLC25A36	1	4	3	2	5.8943	2.95535	20.4218	14.7961	1.8255e-07	7.81439e-07	7.99361	0.988374	1	1	WT - Control	limma	1.8255e-07	7.81439e-07	TRUE	hit	5.8943
553	POMT1	Q9Y6A1|Q9Y6A1-2|Q9Y6A1-3|Q9Y6A1-4	Protein O-mannosyl-transferase 1 OS=Homo sapiens GN=POMT1 PE=1 SV=3|Isoform 2 of Protein O-mannosyl-transferase 1 OS=Homo sapiens GN=POMT1|Isoform 3 of Protein O-mannosyl-transferase 1 OS=Homo sapiens GN=POMT1|Isoform 4 of Protein O-mannosyl-transferase 1 OS=Homo sapiens GN=POMT1	1	4	3	3	5.85324	3.23841	20.4436	14.7957	1.82589e-07	7.81439e-07	7.99339	0.988375	1	1	WT - Control	limma	1.82589e-07	7.81439e-07	TRUE	hit	5.85324
554	DCTN1	E7EX90|Q14203|Q14203-2|Q14203-3|Q14203-4|Q14203-5|Q14203-6	Dynactin subunit 1 OS=Homo sapiens GN=DCTN1 PE=1 SV=1|Dynactin subunit 1 OS=Homo sapiens GN=DCTN1 PE=1 SV=3|Isoform p135 of Dynactin subunit 1 OS=Homo sapiens GN=DCTN1|Isoform 3 of Dynactin subunit 1 OS=Homo sapiens GN=DCTN1|Isoform 4 of Dynactin subunit 1 OS=Homo sapiens GN=DCTN1|Isoform 5 of Dynactin subunit 1 OS=Homo sapiens GN=DCTN1|Isoform 6 of Dynactin subunit 1 OS=Homo sapiens GN=DCTN1	1	4	3	10	6.83093	2.73087	23.1241	14.7872	1.83475e-07	7.83685e-07	7.98846	0.988381	1	1	WT - Control	limma	1.83475e-07	7.83685e-07	TRUE	hit	6.83093
555	POLA1	A0A087WU64|A6NMQ1|P09884	DNA polymerase OS=Homo sapiens GN=POLA1 PE=1 SV=1|DNA polymerase OS=Homo sapiens GN=POLA1 PE=1 SV=1|DNA polymerase alpha catalytic subunit OS=Homo sapiens GN=POLA1 PE=1 SV=2	1	4	3	5	5.88736	2.91096	21.122	14.784	1.83806e-07	7.83685e-07	7.98662	0.988384	1	1	WT - Control	limma	1.83806e-07	7.83685e-07	TRUE	hit	5.88736
556	RPUSD3	Q6P087|Q6P087-2	RNA pseudouridylate synthase domain-containing protein 3 OS=Homo sapiens GN=RPUSD3 PE=1 SV=3|Isoform 2 of RNA pseudouridylate synthase domain-containing protein 3 OS=Homo sapiens GN=RPUSD3	1	4	3	6	6.17024	3.08014	21.5229	14.7738	1.8488e-07	7.86783e-07	7.98068	0.988392	1	1	WT - Control	limma	1.8488e-07	7.86783e-07	TRUE	hit	6.17024
557	NUDT19	A8MXV4	Nucleoside diphosphate-linked moiety X motif 19 OS=Homo sapiens GN=NUDT19 PE=1 SV=1	1	4	3	3	5.75595	2.62991	19.848	14.768	1.8549e-07	7.87898e-07	7.97732	0.988396	1	1	WT - Control	limma	1.8549e-07	7.87898e-07	TRUE	hit	5.75595
558	SLC25A46	Q96AG3|Q96AG3-3	Solute carrier family 25 member 46 OS=Homo sapiens GN=SLC25A46 PE=1 SV=1|Isoform 3 of Solute carrier family 25 member 46 OS=Homo sapiens GN=SLC25A46	1	4	3	2	6.13391	3.01724	19.5491	14.7419	6.44787e-07	1.84551e-06	6.85997	0.988417	1	1	WT - Control	limma	6.44787e-07	1.84551e-06	TRUE	hit	6.13391
559	LENG8	A0A087WTE7|A0A087WUE4|A0A0G2JNN3|C9JMY0|Q96PV6|Q96PV6-2	Leukocyte receptor cluster member 8 OS=Homo sapiens GN=LENG8 PE=1 SV=1|Leukocyte receptor cluster member 8 OS=Homo sapiens GN=LENG8 PE=1 SV=1|Leukocyte receptor cluster member 8 (Fragment) OS=Homo sapiens GN=LENG8 PE=1 SV=1|Leukocyte receptor cluster member 8 OS=Homo sapiens GN=LENG8 PE=1 SV=2|Leukocyte receptor cluster member 8 OS=Homo sapiens GN=LENG8 PE=1 SV=2|Isoform 2 of Leukocyte receptor c…	1	4	3	2	6.36497	2.80955	20.5878	14.7385	1.88623e-07	7.96333e-07	7.96024	0.98842	1	1	WT - Control	limma	1.88623e-07	7.96333e-07	TRUE	hit	6.36497
560	EIF2B5	E9PC74|Q13144	Translation initiation factor eIF-2B subunit epsilon OS=Homo sapiens GN=EIF2B5 PE=1 SV=1|Translation initiation factor eIF-2B subunit epsilon OS=Homo sapiens GN=EIF2B5 PE=1 SV=3	1	4	3	4	6.23321	2.79628	20.8819	14.7363	1.88859e-07	7.96333e-07	7.95896	0.988421	1	1	WT - Control	limma	1.88859e-07	7.96333e-07	TRUE	hit	6.23321
561	INSR	P06213|P06213-2	Insulin receptor OS=Homo sapiens GN=INSR PE=1 SV=4|Isoform Short of Insulin receptor OS=Homo sapiens GN=INSR	1	4	3	3	5.95916	2.83786	21.3863	14.7338	1.89131e-07	7.96333e-07	7.95749	0.988423	1	1	WT - Control	limma	1.89131e-07	7.96333e-07	TRUE	hit	5.95916
562	GPD2	P43304|P43304-2	Glycerol-3-phosphate dehydrogenase, mitochondrial OS=Homo sapiens GN=GPD2 PE=1 SV=3|Isoform 2 of Glycerol-3-phosphate dehydrogenase, mitochondrial OS=Homo sapiens GN=GPD2	1	4	3	2	5.99682	2.81882	20.722	14.7307	1.89465e-07	7.96333e-07	7.95569	0.988426	1	1	WT - Control	limma	1.89465e-07	7.96333e-07	TRUE	hit	5.99682
563	SAMD11	A0A087WXB3|A0A087WYU3|A0A087WYW1|A0A087X1J5|A0A087X223|H7BY14|H7C3J6|Q96NU1|Q96NU1-1|Q96NU1-2|Q96NU1-4|Q96NU1-5|Q96NU1-6	Sterile alpha motif domain-containing protein 11 OS=Homo sapiens GN=SAMD11 PE=1 SV=1|Sterile alpha motif domain-containing protein 11 OS=Homo sapiens GN=SAMD11 PE=1 SV=1|Sterile alpha motif domain-containing protein 11 OS=Homo sapiens GN=SAMD11 PE=1 SV=1|Sterile alpha motif domain-containing protein 11 OS=Homo sapiens GN=SAMD11 PE=1 SV=1|Sterile alpha motif domain-containing protein 11 OS=Homo sa…	1	4	3	2	5.75152	2.81375	20.0816	14.7296	1.89586e-07	7.96333e-07	7.95504	0.988427	1	1	WT - Control	limma	1.89586e-07	7.96333e-07	TRUE	hit	5.75152
564	CDIPT	O14735	CDP-diacylglycerol--inositol 3-phosphatidyltransferase OS=Homo sapiens GN=CDIPT PE=1 SV=1	1	4	3	3	6.06058	4.62839	21.7527	14.7231	6.50956e-07	1.85379e-06	6.8283	0.988432	1	1	WT - Control	limma	6.50956e-07	1.85379e-06	TRUE	hit	6.06058
565	VPS52	Q8N1B4|Q8N1B4-2	Vacuolar protein sorting-associated protein 52 homolog OS=Homo sapiens GN=VPS52 PE=1 SV=1|Isoform 2 of Vacuolar protein sorting-associated protein 52 homolog OS=Homo sapiens GN=VPS52	1	4	3	8	6.46859	3.94575	22.4886	14.7156	1.9111e-07	8.01247e-07	7.94687	0.988438	1	1	WT - Control	limma	1.9111e-07	8.01247e-07	TRUE	hit	6.46859
566	ABCC1	I3L4X2|P33527|P33527-2|P33527-3|P33527-4|P33527-5|P33527-6|P33527-7|P33527-8|P33527-9	Multidrug resistance-associated protein 1 (Fragment) OS=Homo sapiens GN=ABCC1 PE=1 SV=1|Multidrug resistance-associated protein 1 OS=Homo sapiens GN=ABCC1 PE=1 SV=3|Isoform 2 of Multidrug resistance-associated protein 1 OS=Homo sapiens GN=ABCC1|Isoform 3 of Multidrug resistance-associated protein 1 OS=Homo sapiens GN=ABCC1|Isoform 4 of Multidrug resistance-associated protein 1 OS=Homo sapiens GN=…	1	4	3	5	5.88425	3.51168	20.6027	14.6889	6.62339e-07	1.88147e-06	6.83321	0.988459	1	1	WT - Control	limma	6.62339e-07	1.88147e-06	TRUE	hit	5.88425
567	CHPT1	Q8WUD6	Cholinephosphotransferase 1 OS=Homo sapiens GN=CHPT1 PE=1 SV=1	1	4	3	2	6.26122	2.75859	19.9366	14.6801	1.95019e-07	8.16126e-07	7.9262	0.988465	1	1	WT - Control	limma	1.95019e-07	8.16126e-07	TRUE	hit	6.26122
568	NCAPH2	Q6IBW4|Q6IBW4-4	Condensin-2 complex subunit H2 OS=Homo sapiens GN=NCAPH2 PE=1 SV=1|Isoform 4 of Condensin-2 complex subunit H2 OS=Homo sapiens GN=NCAPH2	1	4	3	4	6.22244	3.45814	21.3154	14.6601	1.97263e-07	8.21006e-07	7.91453	0.988481	1	1	WT - Control	limma	1.97263e-07	8.21006e-07	TRUE	hit	6.22244
569	TBL2	E9PF19|Q9Y4P3	Transducin beta-like protein 2 OS=Homo sapiens GN=TBL2 PE=1 SV=1|Transducin beta-like protein 2 OS=Homo sapiens GN=TBL2 PE=1 SV=1	1	4	3	4	6.20912	3.01923	20.9417	14.6559	1.9774e-07	8.21006e-07	7.91206	0.988484	1	1	WT - Control	limma	1.9774e-07	8.21006e-07	TRUE	hit	6.20912
570	ATP6AP2	O75787|O75787-2	Renin receptor OS=Homo sapiens GN=ATP6AP2 PE=1 SV=2|Isoform 2 of Renin receptor OS=Homo sapiens GN=ATP6AP2	1	4	3	4	6.50283	3.97841	22.0664	14.6505	1.9835e-07	8.21006e-07	7.90892	0.988489	1	1	WT - Control	limma	1.9835e-07	8.21006e-07	TRUE	hit	6.50283
571	TARDBP	A0A087WX29|A0A087WYY0|A0A087X260|B1AKP7|G3V162|K7EJM5|K7EN94|Q13148	TAR DNA-binding protein 43 (Fragment) OS=Homo sapiens GN=TARDBP PE=1 SV=1|TAR DNA-binding protein 43 OS=Homo sapiens GN=TARDBP PE=1 SV=1|TAR DNA-binding protein 43 OS=Homo sapiens GN=TARDBP PE=1 SV=1|TAR DNA-binding protein 43 OS=Homo sapiens GN=TARDBP PE=1 SV=1|TAR DNA binding protein, isoform CRA_d OS=Homo sapiens GN=TARDBP PE=1 SV=1|TAR DNA-binding protein 43 (Fragment) OS=Homo sapiens GN=TARD…	1	4	3	2	6.51557	2.70387	21.0355	14.6504	1.98356e-07	8.21006e-07	7.90889	0.988489	1	1	WT - Control	limma	1.98356e-07	8.21006e-07	TRUE	hit	6.51557
572	DSG2	Q14126	Desmoglein-2 OS=Homo sapiens GN=DSG2 PE=1 SV=2	1	4	3	2	5.81181	2.94241	20.7753	14.6473	1.98714e-07	8.21006e-07	7.90705	0.988491	1	1	WT - Control	limma	1.98714e-07	8.21006e-07	TRUE	hit	5.81181
573	NEK7	Q8TDX7	Serine/threonine-protein kinase Nek7 OS=Homo sapiens GN=NEK7 PE=1 SV=1	1	4	3	3	6.0904	2.70356	20.8022	14.6472	1.98724e-07	8.21006e-07	7.90699	0.988491	1	1	WT - Control	limma	1.98724e-07	8.21006e-07	TRUE	hit	6.0904
574	NDUFB4	O95168|O95168-2	NADH dehydrogenase [ubiquinone] 1 beta subcomplex subunit 4 OS=Homo sapiens GN=NDUFB4 PE=1 SV=3|Isoform 2 of NADH dehydrogenase [ubiquinone] 1 beta subcomplex subunit 4 OS=Homo sapiens GN=NDUFB4	1	4	3	2	6.32592	3.76361	20.6106	14.6408	6.78743e-07	1.91845e-06	6.80881	0.988496	1	1	WT - Control	limma	6.78743e-07	1.91845e-06	TRUE	hit	6.32592
575	BSG	P35613-3	Isoform 3 of Basigin OS=Homo sapiens GN=BSG	1	4	3	5	6.85198	4.37925	21.8311	14.6347	2.00148e-07	8.23883e-07	7.8997	0.988501	1	1	WT - Control	limma	2.00148e-07	8.23883e-07	TRUE	hit	6.85198
576	CDC73	Q6P1J9	Parafibromin OS=Homo sapiens GN=CDC73 PE=1 SV=1	1	4	3	8	6.22397	2.83525	22.2173	14.6265	2.01098e-07	8.26291e-07	7.89487	0.988508	1	1	WT - Control	limma	2.01098e-07	8.26291e-07	TRUE	hit	6.22397
577	PTPN14	Q15678	Tyrosine-protein phosphatase non-receptor type 14 OS=Homo sapiens GN=PTPN14 PE=1 SV=2	1	4	3	8	6.19221	3.21631	21.5811	14.6203	2.01813e-07	8.26994e-07	7.89124	0.988512	1	1	WT - Control	limma	2.01813e-07	8.26994e-07	TRUE	hit	6.19221
578	USP54	Q70EL1|Q70EL1-7	Inactive ubiquitin carboxyl-terminal hydrolase 54 OS=Homo sapiens GN=USP54 PE=1 SV=4|Isoform 4 of Inactive ubiquitin carboxyl-terminal hydrolase 54 OS=Homo sapiens GN=USP54	1	4	3	6	5.98014	3.13382	21.2839	14.6187	2.02e-07	8.26994e-07	7.8903	0.988514	1	1	WT - Control	limma	2.02e-07	8.26994e-07	TRUE	hit	5.98014
579	SLC27A3	Q5K4L6|X6R3N0	Long-chain fatty acid transport protein 3 OS=Homo sapiens GN=SLC27A3 PE=2 SV=3|Long-chain fatty acid transport protein 3 OS=Homo sapiens GN=SLC27A3 PE=1 SV=1	1	4	3	3	6.17279	3.8485	21.5557	14.6112	6.89068e-07	1.94278e-06	6.77414	0.98852	1	1	WT - Control	limma	6.89068e-07	1.94278e-06	TRUE	hit	6.17279
580	ZNF629	Q9UEG4	Zinc finger protein 629 OS=Homo sapiens GN=ZNF629 PE=1 SV=2	1	4	3	5	6.47142	3.10149	20.8614	14.6028	2.03852e-07	8.33069e-07	7.88098	0.988526	1	1	WT - Control	limma	2.03852e-07	8.33069e-07	TRUE	hit	6.47142
581	LARP4	Q71RC2|Q71RC2-3|Q71RC2-4|Q71RC2-5	La-related protein 4 OS=Homo sapiens GN=LARP4 PE=1 SV=3|Isoform 3 of La-related protein 4 OS=Homo sapiens GN=LARP4|Isoform 4 of La-related protein 4 OS=Homo sapiens GN=LARP4|Isoform 5 of La-related protein 4 OS=Homo sapiens GN=LARP4	1	4	3	7	6.46482	3.99122	22.5793	14.5794	2.06604e-07	8.38179e-07	7.86727	0.988544	1	1	WT - Control	limma	2.06604e-07	8.38179e-07	TRUE	hit	6.46482
582	SLC38A1	F8VX04|Q9H2H9	Sodium-coupled neutral amino acid transporter 1 OS=Homo sapiens GN=SLC38A1 PE=1 SV=1|Sodium-coupled neutral amino acid transporter 1 OS=Homo sapiens GN=SLC38A1 PE=1 SV=1	1	4	3	3	6.60328	4.94021	21.7696	14.5783	2.06743e-07	8.38179e-07	7.86659	0.988545	1	1	WT - Control	limma	2.06743e-07	8.38179e-07	TRUE	hit	6.60328
583	FLII	Q13045|Q13045-2	Protein flightless-1 homolog OS=Homo sapiens GN=FLII PE=1 SV=2|Isoform 2 of Protein flightless-1 homolog OS=Homo sapiens GN=FLII	1	4	3	6	6.30077	2.72035	21.9963	14.5741	2.07236e-07	8.38179e-07	7.86415	0.988549	1	1	WT - Control	limma	2.07236e-07	8.38179e-07	TRUE	hit	6.30077
584	PRPS1	P60891	Ribose-phosphate pyrophosphokinase 1 OS=Homo sapiens GN=PRPS1 PE=1 SV=2	1	4	3	2	6.64443	2.80905	21.4593	14.5708	2.07629e-07	8.38179e-07	7.86222	0.988551	1	1	WT - Control	limma	2.07629e-07	8.38179e-07	TRUE	hit	6.64443
585	CDC16	Q13042|Q13042-2|Q13042-3	Cell division cycle protein 16 homolog OS=Homo sapiens GN=CDC16 PE=1 SV=2|Isoform 2 of Cell division cycle protein 16 homolog OS=Homo sapiens GN=CDC16|Isoform 3 of Cell division cycle protein 16 homolog OS=Homo sapiens GN=CDC16	1	4	3	3	5.95638	2.79762	20.5098	14.5686	2.07902e-07	8.38179e-07	7.86088	0.988553	1	1	WT - Control	limma	2.07902e-07	8.38179e-07	TRUE	hit	5.95638
586	DCAF10	Q5QP82|Q5QP82-2	DDB1- and CUL4-associated factor 10 OS=Homo sapiens GN=DCAF10 PE=1 SV=1|Isoform 2 of DDB1- and CUL4-associated factor 10 OS=Homo sapiens GN=DCAF10	1	4	3	4	6.13434	2.90149	20.4508	14.5677	2.08005e-07	8.38179e-07	7.86037	0.988554	1	1	WT - Control	limma	2.08005e-07	8.38179e-07	TRUE	hit	6.13434
587	ANAPC5	F5GZ05|F5H0F9|Q9UJX4	Anaphase-promoting complex subunit 5 (Fragment) OS=Homo sapiens GN=ANAPC5 PE=1 SV=1|Anaphase-promoting complex subunit 5 OS=Homo sapiens GN=ANAPC5 PE=1 SV=1|Anaphase-promoting complex subunit 5 OS=Homo sapiens GN=ANAPC5 PE=1 SV=2	1	4	3	3	6.02716	3.43814	20.9688	14.5649	2.08344e-07	8.38179e-07	7.8587	0.988556	1	1	WT - Control	limma	2.08344e-07	8.38179e-07	TRUE	hit	6.02716
588	HYOU1	A0A087X054|Q9Y4L1	Hypoxia up-regulated protein 1 OS=Homo sapiens GN=HYOU1 PE=1 SV=1|Hypoxia up-regulated protein 1 OS=Homo sapiens GN=HYOU1 PE=1 SV=1	1	4	3	14	7.08739	4.45584	23.6452	14.5641	2.08434e-07	8.38179e-07	7.85826	0.988557	1	1	WT - Control	limma	2.08434e-07	8.38179e-07	TRUE	hit	7.08739
589	PARL	C9JNP8|F8WCQ4|H7C0U0|Q9H300|Q9H300-2	Rhomboid-like protein OS=Homo sapiens GN=PARL PE=1 SV=1|Rhomboid-like protein OS=Homo sapiens GN=PARL PE=1 SV=1|Rhomboid-like protein (Fragment) OS=Homo sapiens GN=PARL PE=1 SV=1|Presenilins-associated rhomboid-like protein, mitochondrial OS=Homo sapiens GN=PARL PE=1 SV=2|Isoform 2 of Presenilins-associated rhomboid-like protein, mitochondrial OS=Homo sapiens GN=PARL	1	4	3	2	5.86892	3.10965	20.067	14.5474	2.10447e-07	8.44774e-07	7.84844	0.98857	1	1	WT - Control	limma	2.10447e-07	8.44774e-07	TRUE	hit	5.86892
590	CDC6	Q99741	Cell division control protein 6 homolog OS=Homo sapiens GN=CDC6 PE=1 SV=1	1	4	3	4	6.16263	3.59581	21.5955	14.5396	2.11406e-07	8.47119e-07	7.84379	0.988576	1	1	WT - Control	limma	2.11406e-07	8.47119e-07	TRUE	hit	6.16263
591	ERLIN2	E5RHW4|O94905	Erlin-2 (Fragment) OS=Homo sapiens GN=ERLIN2 PE=1 SV=1|Erlin-2 OS=Homo sapiens GN=ERLIN2 PE=1 SV=1	1	4	3	5	6.19148	3.26352	22.1624	14.5041	2.1578e-07	8.60846e-07	7.82286	0.988604	1	1	WT - Control	limma	2.1578e-07	8.60846e-07	TRUE	hit	6.19148
592	LMTK2	Q8IWU2	Serine/threonine-protein kinase LMTK2 OS=Homo sapiens GN=LMTK2 PE=1 SV=2	1	4	3	2	5.56305	2.84132	19.7551	14.4997	2.16333e-07	8.60846e-07	7.82024	0.988607	1	1	WT - Control	limma	2.16333e-07	8.60846e-07	TRUE	hit	5.56305
593	COPB1	P53618	Coatomer subunit beta OS=Homo sapiens GN=COPB1 PE=1 SV=3	1	4	3	8	6.68046	3.46343	21.8515	14.4994	2.16368e-07	8.60846e-07	7.82007	0.988607	1	1	WT - Control	limma	2.16368e-07	8.60846e-07	TRUE	hit	6.68046
594	PDK1	Q15118	[Pyruvate dehydrogenase (acetyl-transferring)] kinase isozyme 1, mitochondrial OS=Homo sapiens GN=PDK1 PE=1 SV=1	1	4	3	4	6.41172	3.57561	20.8362	14.4963	2.16751e-07	8.60846e-07	7.81827	0.98861	1	1	WT - Control	limma	2.16751e-07	8.60846e-07	TRUE	hit	6.41172
595	COG4	A0A0A0MS45|J3KNI1|Q9H9E3	Conserved oligomeric Golgi complex subunit 4 OS=Homo sapiens GN=COG4 PE=1 SV=1|Conserved oligomeric Golgi complex subunit 4 OS=Homo sapiens GN=COG4 PE=1 SV=1|Conserved oligomeric Golgi complex subunit 4 OS=Homo sapiens GN=COG4 PE=1 SV=3	1	4	3	8	6.09744	3.84901	21.9345	14.4955	2.16849e-07	8.60846e-07	7.8178	0.98861	1	1	WT - Control	limma	2.16849e-07	8.60846e-07	TRUE	hit	6.09744
596	DNAJC3	Q13217|X6R9L0	DnaJ homolog subfamily C member 3 OS=Homo sapiens GN=DNAJC3 PE=1 SV=1|DnaJ homolog subfamily C member 3 OS=Homo sapiens GN=DNAJC3 PE=1 SV=1	1	4	3	9	6.83566	6.43503	22.946	14.493	2.17163e-07	8.60846e-07	7.81632	0.988612	1	1	WT - Control	limma	2.17163e-07	8.60846e-07	TRUE	hit	6.83566
597	XRCC3	O43542	DNA repair protein XRCC3 OS=Homo sapiens GN=XRCC3 PE=1 SV=1	1	4	3	3	6.50244	3.50063	20.7441	14.4904	7.33064e-07	2.0314e-06	6.73191	0.988614	1	1	WT - Control	limma	7.33064e-07	2.0314e-06	TRUE	hit	6.50244
598	ARHGEF12	E9PMR6|Q9NZN5|Q9NZN5-2	Rho guanine nucleotide exchange factor 12 OS=Homo sapiens GN=ARHGEF12 PE=1 SV=1|Rho guanine nucleotide exchange factor 12 OS=Homo sapiens GN=ARHGEF12 PE=1 SV=1|Isoform 2 of Rho guanine nucleotide exchange factor 12 OS=Homo sapiens GN=ARHGEF12	1	4	3	5	5.85193	3.56739	21.1983	14.4877	2.17837e-07	8.60846e-07	7.81315	0.988617	1	1	WT - Control	limma	2.17837e-07	8.60846e-07	TRUE	hit	5.85193
599	CELSR1	Q9NYQ6	Cadherin EGF LAG seven-pass G-type receptor 1 OS=Homo sapiens GN=CELSR1 PE=1 SV=1	1	4	3	5	6.1424	2.91432	20.5454	14.4874	2.17873e-07	8.60846e-07	7.81298	0.988617	1	1	WT - Control	limma	2.17873e-07	8.60846e-07	TRUE	hit	6.1424
600	CKAP2	Q8WWK9|Q8WWK9-5|Q8WWK9-6	Cytoskeleton-associated protein 2 OS=Homo sapiens GN=CKAP2 PE=1 SV=1|Isoform 3 of Cytoskeleton-associated protein 2 OS=Homo sapiens GN=CKAP2|Isoform 4 of Cytoskeleton-associated protein 2 OS=Homo sapiens GN=CKAP2	1	4	3	7	6.17696	2.82979	22.1485	14.4704	2.20022e-07	8.67823e-07	7.80294	0.98863	1	1	WT - Control	limma	2.20022e-07	8.67823e-07	TRUE	hit	6.17696
601	NUP214	P35658|P35658-2|P35658-3|P35658-4|P35658-5	Nuclear pore complex protein Nup214 OS=Homo sapiens GN=NUP214 PE=1 SV=2|Isoform 2 of Nuclear pore complex protein Nup214 OS=Homo sapiens GN=NUP214|Isoform 3 of Nuclear pore complex protein Nup214 OS=Homo sapiens GN=NUP214|Isoform 4 of Nuclear pore complex protein Nup214 OS=Homo sapiens GN=NUP214|Isoform 5 of Nuclear pore complex protein Nup214 OS=Homo sapiens GN=NUP214	1	4	3	3	5.73858	2.57082	20.8313	14.4653	2.20681e-07	8.68908e-07	7.79989	0.988634	1	1	WT - Control	limma	2.20681e-07	8.68908e-07	TRUE	hit	5.73858
602	VPS33A	Q96AX1	Vacuolar protein sorting-associated protein 33A OS=Homo sapiens GN=VPS33A PE=1 SV=1	1	4	3	5	6.47356	2.77214	22.172	14.46	2.21357e-07	8.70054e-07	7.79676	0.988638	1	1	WT - Control	limma	2.21357e-07	8.70054e-07	TRUE	hit	6.47356
603	LBR	Q14739	Lamin-B receptor OS=Homo sapiens GN=LBR PE=1 SV=2	1	4	3	10	7.49177	4.58775	24.2879	14.4543	2.2209e-07	8.70803e-07	7.79338	0.988643	1	1	WT - Control	limma	2.2209e-07	8.70803e-07	TRUE	hit	7.49177
604	ERBB2IP	Q96RT1|Q96RT1-2|Q96RT1-3|Q96RT1-5|Q96RT1-7|Q96RT1-8|Q96RT1-9	Protein LAP2 OS=Homo sapiens GN=ERBB2IP PE=1 SV=2|Isoform 2 of Protein LAP2 OS=Homo sapiens GN=ERBB2IP|Isoform 3 of Protein LAP2 OS=Homo sapiens GN=ERBB2IP|Isoform 5 of Protein LAP2 OS=Homo sapiens GN=ERBB2IP|Isoform 7 of Protein LAP2 OS=Homo sapiens GN=ERBB2IP|Isoform 8 of Protein LAP2 OS=Homo sapiens GN=ERBB2IP|Isoform 9 of Protein LAP2 OS=Homo sapiens GN=ERBB2IP	1	4	3	7	5.94391	2.55369	22.0007	14.4525	2.22316e-07	8.70803e-07	7.79233	0.988644	1	1	WT - Control	limma	2.22316e-07	8.70803e-07	TRUE	hit	5.94391
605	SLC25A14	F6SL11|O95258|O95258-2	Brain mitochondrial carrier protein 1 OS=Homo sapiens GN=SLC25A14 PE=1 SV=1|Brain mitochondrial carrier protein 1 OS=Homo sapiens GN=SLC25A14 PE=2 SV=1|Isoform 2 of Brain mitochondrial carrier protein 1 OS=Homo sapiens GN=SLC25A14	1	4	3	2	6.11962	3.48317	20.5403	14.4386	2.24123e-07	8.74851e-07	7.78405	0.988655	1	1	WT - Control	limma	2.24123e-07	8.74851e-07	TRUE	hit	6.11962
606	PLXNB2	O15031	Plexin-B2 OS=Homo sapiens GN=PLXNB2 PE=1 SV=3	1	4	3	3	5.69638	2.42973	20.3862	14.4236	2.26082e-07	8.79831e-07	7.77515	0.988667	1	1	WT - Control	limma	2.26082e-07	8.79831e-07	TRUE	hit	5.69638
607	MYCBP2	O75592|O75592-2	E3 ubiquitin-protein ligase MYCBP2 OS=Homo sapiens GN=MYCBP2 PE=1 SV=3|Isoform 2 of E3 ubiquitin-protein ligase MYCBP2 OS=Homo sapiens GN=MYCBP2	1	4	3	10	5.99779	3.39752	21.9923	14.4186	2.26736e-07	8.80497e-07	7.77219	0.988671	1	1	WT - Control	limma	2.26736e-07	8.80497e-07	TRUE	hit	5.99779
608	RUVBL2	Q9Y230	RuvB-like 2 OS=Homo sapiens GN=RUVBL2 PE=1 SV=3	1	4	3	9	6.90392	2.53313	23.0777	14.4112	2.27721e-07	8.82628e-07	7.76776	0.988677	1	1	WT - Control	limma	2.27721e-07	8.82628e-07	TRUE	hit	6.90392
609	NT5DC2	Q9H857|Q9H857-2	5'-nucleotidase domain-containing protein 2 OS=Homo sapiens GN=NT5DC2 PE=1 SV=1|Isoform 2 of 5'-nucleotidase domain-containing protein 2 OS=Homo sapiens GN=NT5DC2	1	4	3	3	6.28612	2.5707	21.2213	14.4086	2.28064e-07	8.82628e-07	7.76621	0.988679	1	1	WT - Control	limma	2.28064e-07	8.82628e-07	TRUE	hit	6.28612
610	RAB9A	P51151	Ras-related protein Rab-9A OS=Homo sapiens GN=RAB9A PE=1 SV=1	1	4	3	2	6.12617	3.44675	20.5739	14.3993	7.68312e-07	2.10588e-06	6.68493	0.988686	1	1	WT - Control	limma	7.68312e-07	2.10588e-06	TRUE	hit	6.12617
611	EMC1	Q8N766|Q8N766-2|Q8N766-3	ER membrane protein complex subunit 1 OS=Homo sapiens GN=EMC1 PE=1 SV=1|Isoform 2 of ER membrane protein complex subunit 1 OS=Homo sapiens GN=EMC1|Isoform 3 of ER membrane protein complex subunit 1 OS=Homo sapiens GN=EMC1	1	4	3	7	6.47455	2.7831	22.086	14.3888	2.30708e-07	8.91335e-07	7.75442	0.988694	1	1	WT - Control	limma	2.30708e-07	8.91335e-07	TRUE	hit	6.47455
612	RICTOR	Q6R327|Q6R327-3	Rapamycin-insensitive companion of mTOR OS=Homo sapiens GN=RICTOR PE=1 SV=1|Isoform 3 of Rapamycin-insensitive companion of mTOR OS=Homo sapiens GN=RICTOR	1	4	3	6	6.05911	3.40845	21.6358	14.3852	2.31191e-07	8.91679e-07	7.75228	0.988697	1	1	WT - Control	limma	2.31191e-07	8.91679e-07	TRUE	hit	6.05911
613	ANAPC1	Q9H1A4	Anaphase-promoting complex subunit 1 OS=Homo sapiens GN=ANAPC1 PE=1 SV=1	1	4	3	5	6.17931	2.52498	21.3791	14.3786	2.3208e-07	8.92544e-07	7.74834	0.988702	1	1	WT - Control	limma	2.3208e-07	8.92544e-07	TRUE	hit	6.17931
614	FKBP10	Q96AY3	Peptidyl-prolyl cis-trans isomerase FKBP10 OS=Homo sapiens GN=FKBP10 PE=1 SV=1	1	4	3	4	6.45834	2.79382	21.3634	14.3744	2.32647e-07	8.92734e-07	7.74585	0.988706	1	1	WT - Control	limma	2.32647e-07	8.92734e-07	TRUE	hit	6.45834
615	RPS11	P62280	40S ribosomal protein S11 OS=Homo sapiens GN=RPS11 PE=1 SV=3	1	4	3	8	7.62558	3.57084	23.7149	14.3603	2.34569e-07	8.96848e-07	7.73742	0.988717	1	1	WT - Control	limma	2.34569e-07	8.96848e-07	TRUE	hit	7.62558
616	HAUS6	Q5VY60|Q7Z4H7	HAUS augmin-like complex subunit 6 OS=Homo sapiens GN=HAUS6 PE=1 SV=1|HAUS augmin-like complex subunit 6 OS=Homo sapiens GN=HAUS6 PE=1 SV=2	1	4	3	7	6.06112	2.64393	21.5803	14.359	2.34743e-07	8.96848e-07	7.73666	0.988718	1	1	WT - Control	limma	2.34743e-07	8.96848e-07	TRUE	hit	6.06112
617	CDC20	Q12834	Cell division cycle protein 20 homolog OS=Homo sapiens GN=CDC20 PE=1 SV=2	1	4	3	3	6.06102	2.61365	20.4302	14.3578	2.34908e-07	8.96848e-07	7.73595	0.988719	1	1	WT - Control	limma	2.34908e-07	8.96848e-07	TRUE	hit	6.06102
618	XXYLT1	Q8NBI6	Xyloside xylosyltransferase 1 OS=Homo sapiens GN=XXYLT1 PE=1 SV=1	1	4	3	3	6.02323	3.17007	21.0555	14.3407	2.37272e-07	9.04352e-07	7.72569	0.988732	1	1	WT - Control	limma	2.37272e-07	9.04352e-07	TRUE	hit	6.02323
619	PLXNA1	Q9UIW2	Plexin-A1 OS=Homo sapiens GN=PLXNA1 PE=1 SV=3	1	4	3	2	6.06197	3.00308	20.804	14.3244	2.39537e-07	9.11447e-07	7.71596	0.988745	1	1	WT - Control	limma	2.39537e-07	9.11447e-07	TRUE	hit	6.06197
620	NDC1	Q9BTX1|Q9BTX1-2|Q9BTX1-5|Q9BTX1-6	Nucleoporin NDC1 OS=Homo sapiens GN=NDC1 PE=1 SV=2|Isoform 2 of Nucleoporin NDC1 OS=Homo sapiens GN=NDC1|Isoform 5 of Nucleoporin NDC1 OS=Homo sapiens GN=NDC1|Isoform 6 of Nucleoporin NDC1 OS=Homo sapiens GN=NDC1	1	4	3	3	6.18006	2.73439	21.3552	14.2806	2.45767e-07	9.33587e-07	7.68965	0.988779	1	1	WT - Control	limma	2.45767e-07	9.33587e-07	TRUE	hit	6.18006
621	WDTC1	Q8N5D0|Q8N5D0-2|Q8N5D0-3|Q8N5D0-4|Q8N5D0-5|Q8N5D0-6	WD and tetratricopeptide repeats protein 1 OS=Homo sapiens GN=WDTC1 PE=1 SV=2|Isoform 2 of WD and tetratricopeptide repeats protein 1 OS=Homo sapiens GN=WDTC1|Isoform 3 of WD and tetratricopeptide repeats protein 1 OS=Homo sapiens GN=WDTC1|Isoform 4 of WD and tetratricopeptide repeats protein 1 OS=Homo sapiens GN=WDTC1|Isoform 5 of WD and tetratricopeptide repeats protein 1 OS=Homo sapiens GN=WDT…	1	4	3	3	5.9384	3.09673	20.941	14.2757	2.46465e-07	9.34669e-07	7.68674	0.988783	1	1	WT - Control	limma	2.46465e-07	9.34669e-07	TRUE	hit	5.9384
622	PPP6R3	E9PKF6|H7BXH2|Q5H9R7|Q5H9R7-2|Q5H9R7-3|Q5H9R7-4|Q5H9R7-5|Q5H9R7-6	Serine/threonine-protein phosphatase 6 regulatory subunit 3 OS=Homo sapiens GN=PPP6R3 PE=1 SV=1|Serine/threonine-protein phosphatase 6 regulatory subunit 3 OS=Homo sapiens GN=PPP6R3 PE=1 SV=1|Serine/threonine-protein phosphatase 6 regulatory subunit 3 OS=Homo sapiens GN=PPP6R3 PE=1 SV=2|Isoform 2 of Serine/threonine-protein phosphatase 6 regulatory subunit 3 OS=Homo sapiens GN=PPP6R3|Isoform 3 of…	1	4	3	6	6.66594	3.50153	21.6487	14.2704	2.47236e-07	9.36023e-07	7.68354	0.988787	1	1	WT - Control	limma	2.47236e-07	9.36023e-07	TRUE	hit	6.66594
623	FHOD1	Q9Y613	FH1/FH2 domain-containing protein 1 OS=Homo sapiens GN=FHOD1 PE=1 SV=3	1	4	3	5	6.01203	3.2454	20.9595	14.2616	8.25327e-07	2.2271e-06	6.61319	0.988794	1	1	WT - Control	limma	8.25327e-07	2.2271e-06	TRUE	hit	6.01203
624	MAD2L2	B1AK44|Q9UI95	Mitotic spindle assembly checkpoint protein MAD2B OS=Homo sapiens GN=MAD2L2 PE=1 SV=1|Mitotic spindle assembly checkpoint protein MAD2B OS=Homo sapiens GN=MAD2L2 PE=1 SV=2	1	4	3	2	6.62307	4.35465	21.8617	14.2564	8.27554e-07	2.23045e-06	6.59901	0.988798	1	1	WT - Control	limma	8.27554e-07	2.23045e-06	TRUE	hit	6.62307
625	LRBA	P50851|P50851-2	Lipopolysaccharide-responsive and beige-like anchor protein OS=Homo sapiens GN=LRBA PE=1 SV=4|Isoform 2 of Lipopolysaccharide-responsive and beige-like anchor protein OS=Homo sapiens GN=LRBA	1	4	3	9	6.11209	3.08708	22.0679	14.2563	2.4929e-07	9.41198e-07	7.67506	0.988798	1	1	WT - Control	limma	2.4929e-07	9.41198e-07	TRUE	hit	6.11209
626	MTMR4	J3QR65|Q9NYA4	Myotubularin-related protein 4 OS=Homo sapiens GN=MTMR4 PE=1 SV=1|Myotubularin-related protein 4 OS=Homo sapiens GN=MTMR4 PE=1 SV=2	1	4	3	7	6.60223	5.29599	22.1838	14.2553	2.49434e-07	9.41198e-07	7.67447	0.988799	1	1	WT - Control	limma	2.49434e-07	9.41198e-07	TRUE	hit	6.60223
627	PEX6	Q13608	Peroxisome assembly factor 2 OS=Homo sapiens GN=PEX6 PE=1 SV=2	1	4	3	3	6.07716	3.21918	20.3984	14.2433	8.33215e-07	2.24304e-06	6.60365	0.988809	1	1	WT - Control	limma	8.33215e-07	2.24304e-06	TRUE	hit	6.07716
628	ZNF568	A0A0C4DGP9|Q3ZCX4|Q3ZCX4-2	Zinc finger protein 568 (Fragment) OS=Homo sapiens GN=ZNF568 PE=4 SV=1|Zinc finger protein 568 OS=Homo sapiens GN=ZNF568 PE=2 SV=2|Isoform 2 of Zinc finger protein 568 OS=Homo sapiens GN=ZNF568	1	4	3	2	6.38934	3.23579	20.8737	14.2427	2.51297e-07	9.4665e-07	7.66684	0.988809	1	1	WT - Control	limma	2.51297e-07	9.4665e-07	TRUE	hit	6.38934
629	RPS4X	P62701	40S ribosomal protein S4, X isoform OS=Homo sapiens GN=RPS4X PE=1 SV=2	1	4	3	12	7.57893	2.69778	24.1544	14.2332	2.52702e-07	9.501e-07	7.66113	0.988817	1	1	WT - Control	limma	2.52702e-07	9.501e-07	TRUE	hit	7.57893
630	LGMN	Q99538-2	Isoform 2 of Legumain OS=Homo sapiens GN=LGMN	1	4	3	2	6.32842	3.58487	20.6129	14.229	2.53329e-07	9.501e-07	7.65859	0.98882	1	1	WT - Control	limma	2.53329e-07	9.501e-07	TRUE	hit	6.32842
631	ZWILCH	Q9H900	Protein zwilch homolog OS=Homo sapiens GN=ZWILCH PE=1 SV=2	1	4	3	4	6.05226	3.73382	21.604	14.2259	2.53781e-07	9.501e-07	7.65676	0.988822	1	1	WT - Control	limma	2.53781e-07	9.501e-07	TRUE	hit	6.05226
632	AP5B1	Q2VPB7	AP-5 complex subunit beta-1 OS=Homo sapiens GN=AP5B1 PE=1 SV=4	1	4	3	3	5.98807	2.65742	20.6716	14.2252	2.53892e-07	9.501e-07	7.65631	0.988823	1	1	WT - Control	limma	2.53892e-07	9.501e-07	TRUE	hit	5.98807
633	FANCA	O15360	Fanconi anemia group A protein OS=Homo sapiens GN=FANCA PE=1 SV=2	1	4	3	6	6.05145	3.43759	21.1539	14.1958	8.54223e-07	2.27957e-06	6.57866	0.988846	1	1	WT - Control	limma	8.54223e-07	2.27957e-06	TRUE	hit	6.05145
634	SLC2A1	P11166	Solute carrier family 2, facilitated glucose transporter member 1 OS=Homo sapiens GN=SLC2A1 PE=1 SV=2	1	4	3	2	6.45047	3.18272	21.3585	14.1958	8.54235e-07	2.27957e-06	6.57864	0.988846	1	1	WT - Control	limma	8.54235e-07	2.27957e-06	TRUE	hit	6.45047
635	ATP2B1	P20020-3|P20020-6	Isoform B of Plasma membrane calcium-transporting ATPase 1 OS=Homo sapiens GN=ATP2B1|Isoform K of Plasma membrane calcium-transporting ATPase 1 OS=Homo sapiens GN=ATP2B1	1	4	3	10	6.70782	3.57107	23.099	14.1924	2.58839e-07	9.63284e-07	7.63652	0.988849	1	1	WT - Control	limma	2.58839e-07	9.63284e-07	TRUE	hit	6.70782
636	CDK11B|CDC2L1|CDK11A	A0A0D9SEI3|A0A0D9SEN2|A0A0D9SER5|B7ZVY7|J3QR44|P21127|P21127-2|P21127-3|P21127-8|Q5QPR3|Q9UQ88|Q9UQ88-2|Q9UQ88-3|Q9UQ88-4	Cyclin-dependent kinase 11B OS=Homo sapiens GN=CDK11B PE=1 SV=1|Cyclin-dependent kinase 11B OS=Homo sapiens GN=CDK11B PE=1 SV=1|Cyclin-dependent kinase 11B OS=Homo sapiens GN=CDK11B PE=1 SV=1|Cell division cycle 2-like 1 (PITSLRE proteins) OS=Homo sapiens GN=CDC2L1 PE=1 SV=1|Cyclin-dependent kinase 11B OS=Homo sapiens GN=CDK11B PE=1 SV=2|Cyclin-dependent kinase 11B OS=Homo sapiens GN=CDK11B PE=1 …	1	4	3	3	6.06428	2.63085	21.8953	14.1907	2.59105e-07	9.63284e-07	7.63547	0.98885	1	1	WT - Control	limma	2.59105e-07	9.63284e-07	TRUE	hit	6.06428
637	COG1	Q8WTW3	Conserved oligomeric Golgi complex subunit 1 OS=Homo sapiens GN=COG1 PE=1 SV=1	1	4	3	3	5.87529	3.31475	20.7198	14.1884	2.59456e-07	9.63284e-07	7.63408	0.988852	1	1	WT - Control	limma	2.59456e-07	9.63284e-07	TRUE	hit	5.87529
638	UCKL1	Q9NWZ5|Q9NWZ5-2|Q9NWZ5-3|Q9NWZ5-4	Uridine-cytidine kinase-like 1 OS=Homo sapiens GN=UCKL1 PE=1 SV=2|Isoform 2 of Uridine-cytidine kinase-like 1 OS=Homo sapiens GN=UCKL1|Isoform 3 of Uridine-cytidine kinase-like 1 OS=Homo sapiens GN=UCKL1|Isoform 4 of Uridine-cytidine kinase-like 1 OS=Homo sapiens GN=UCKL1	1	4	3	2	5.97038	2.93579	20.4296	14.1788	2.60939e-07	9.66882e-07	7.62823	0.988859	1	1	WT - Control	limma	2.60939e-07	9.66882e-07	TRUE	hit	5.97038
639	LZTS2	Q9BRK4	Leucine zipper putative tumor suppressor 2 OS=Homo sapiens GN=LZTS2 PE=1 SV=2	1	4	3	2	5.58991	2.82146	20.4516	14.1719	2.62004e-07	9.69245e-07	7.62405	0.988865	1	1	WT - Control	limma	2.62004e-07	9.69245e-07	TRUE	hit	5.58991
640	MSI1	O43347	RNA-binding protein Musashi homolog 1 OS=Homo sapiens GN=MSI1 PE=1 SV=1	1	4	3	5	6.3954	3.92771	22.8797	14.1645	2.63142e-07	9.71867e-07	7.61961	0.988871	1	1	WT - Control	limma	2.63142e-07	9.71867e-07	TRUE	hit	6.3954
641	MTFR1L	E9PLD2|Q9H019|Q9H019-3	Mitochondrial fission regulator 1-like OS=Homo sapiens GN=MTFR1L PE=1 SV=1|Mitochondrial fission regulator 1-like OS=Homo sapiens GN=MTFR1L PE=1 SV=2|Isoform 3 of Mitochondrial fission regulator 1-like OS=Homo sapiens GN=MTFR1L	1	4	3	2	6.06229	2.88908	20.0818	14.1477	2.65775e-07	9.7999e-07	7.60939	0.988884	1	1	WT - Control	limma	2.65775e-07	9.7999e-07	TRUE	hit	6.06229
642	POM121C|POM121	A0A075B7F8|A8CG34|Q96HA1	Nuclear envelope pore membrane protein POM 121C OS=Homo sapiens GN=POM121C PE=1 SV=2|Nuclear envelope pore membrane protein POM 121C OS=Homo sapiens GN=POM121C PE=1 SV=2|Nuclear envelope pore membrane protein POM 121 OS=Homo sapiens GN=POM121 PE=1 SV=2	1	4	3	2	6.45605	3.8328	21.603	14.1347	8.82086e-07	2.32756e-06	6.5377	0.988894	1	1	WT - Control	limma	8.82086e-07	2.32756e-06	TRUE	hit	6.45605
643	VPS50	Q96JG6|Q96JG6-3	Syndetin OS=Homo sapiens GN=VPS50 PE=1 SV=3|Isoform 3 of Syndetin OS=Homo sapiens GN=VPS50	1	4	3	4	5.80433	2.8691	20.4955	14.1171	2.70625e-07	9.94633e-07	7.59083	0.988908	1	1	WT - Control	limma	2.70625e-07	9.94633e-07	TRUE	hit	5.80433
644	NPHP4	O75161	Nephrocystin-4 OS=Homo sapiens GN=NPHP4 PE=1 SV=2	1	4	3	2	5.72712	2.72634	20.0446	14.1079	2.72114e-07	9.96259e-07	7.5852	0.988915	1	1	WT - Control	limma	2.72114e-07	9.96259e-07	TRUE	hit	5.72712
645	TSEN34	A0A024R4N9|E7EQB3|Q9BSV6	tRNA-splicing endonuclease subunit Sen34 OS=Homo sapiens GN=TSEN34 PE=1 SV=1|tRNA-splicing endonuclease subunit Sen34 OS=Homo sapiens GN=TSEN34 PE=1 SV=2|tRNA-splicing endonuclease subunit Sen34 OS=Homo sapiens GN=TSEN34 PE=1 SV=1	1	4	3	2	6.26402	3.10662	20.6705	14.1044	2.72668e-07	9.96259e-07	7.58311	0.988918	1	1	WT - Control	limma	2.72668e-07	9.96259e-07	TRUE	hit	6.26402
646	DHCR7	Q9UBM7	7-dehydrocholesterol reductase OS=Homo sapiens GN=DHCR7 PE=1 SV=1	1	4	3	2	7.1732	4.05821	21.5525	14.1039	2.72756e-07	9.96259e-07	7.58278	0.988918	1	1	WT - Control	limma	2.72756e-07	9.96259e-07	TRUE	hit	7.1732
647	PARK7	Q99497	Protein deglycase DJ-1 OS=Homo sapiens GN=PARK7 PE=1 SV=2	1	4	3	5	6.36219	3.03335	20.4018	14.1035	2.72827e-07	9.96259e-07	7.58251	0.988918	1	1	WT - Control	limma	2.72827e-07	9.96259e-07	TRUE	hit	6.36219
648	URI1	O94763|O94763-3	Unconventional prefoldin RPB5 interactor 1 OS=Homo sapiens GN=URI1 PE=1 SV=3|Isoform 3 of Unconventional prefoldin RPB5 interactor 1 OS=Homo sapiens GN=URI1	1	4	3	3	5.72239	2.76037	20.797	14.099	2.73556e-07	9.97311e-07	7.57977	0.988922	1	1	WT - Control	limma	2.73556e-07	9.97311e-07	TRUE	hit	5.72239
649	SLC38A10	Q9HBR0	Putative sodium-coupled neutral amino acid transporter 10 OS=Homo sapiens GN=SLC38A10 PE=1 SV=2	1	4	3	2	5.91321	3.38491	20.2482	14.068	9.13657e-07	2.39135e-06	6.51106	0.988946	1	1	WT - Control	limma	9.13657e-07	2.39135e-06	TRUE	hit	5.91321
650	PRPF39	Q86UA1	Pre-mRNA-processing factor 39 OS=Homo sapiens GN=PRPF39 PE=1 SV=3	1	4	3	5	6.15364	2.95218	21.1126	14.0646	2.79201e-07	1.01626e-06	7.5588	0.988949	1	1	WT - Control	limma	2.79201e-07	1.01626e-06	TRUE	hit	6.15364
651	BAG5	Q9UL15|Q9UL15-2	BAG family molecular chaperone regulator 5 OS=Homo sapiens GN=BAG5 PE=1 SV=1|Isoform 2 of BAG family molecular chaperone regulator 5 OS=Homo sapiens GN=BAG5	1	4	3	2	5.83116	2.97371	21.8726	14.0591	2.80113e-07	1.01794e-06	7.55545	0.988953	1	1	WT - Control	limma	2.80113e-07	1.01794e-06	TRUE	hit	5.83116
652	EEF1A1	P68104	Elongation factor 1-alpha 1 OS=Homo sapiens GN=EEF1A1 PE=1 SV=1	1	4	3	12	8.06273	3.85463	25.4467	14.0524	2.81225e-07	1.01909e-06	7.55138	0.988959	1	1	WT - Control	limma	2.81225e-07	1.01909e-06	TRUE	hit	8.06273
653	SON	P18583|P18583-2|P18583-5|P18583-7|P18583-9	Protein SON OS=Homo sapiens GN=SON PE=1 SV=4|Isoform A of Protein SON OS=Homo sapiens GN=SON|Isoform D of Protein SON OS=Homo sapiens GN=SON|Isoform G of Protein SON OS=Homo sapiens GN=SON|Isoform I of Protein SON OS=Homo sapiens GN=SON	1	4	3	5	6.16101	2.89031	21.6344	14.0518	2.8133e-07	1.01909e-06	7.551	0.988959	1	1	WT - Control	limma	2.8133e-07	1.01909e-06	TRUE	hit	6.16101
654	TARBP1	Q13395	Probable methyltransferase TARBP1 OS=Homo sapiens GN=TARBP1 PE=1 SV=1	1	4	3	2	6.22797	3.52259	21.1642	14.0341	9.30222e-07	2.41818e-06	6.49298	0.988973	1	1	WT - Control	limma	9.30222e-07	2.41818e-06	TRUE	hit	6.22797
655	MYBBP1A	Q9BQG0|Q9BQG0-2	Myb-binding protein 1A OS=Homo sapiens GN=MYBBP1A PE=1 SV=2|Isoform 2 of Myb-binding protein 1A OS=Homo sapiens GN=MYBBP1A	1	4	3	8	6.53182	2.73346	22.8533	14.0212	2.86513e-07	1.03621e-06	7.53225	0.988983	1	1	WT - Control	limma	2.86513e-07	1.03621e-06	TRUE	hit	6.53182
656	TMEM165	Q9HC07	Transmembrane protein 165 OS=Homo sapiens GN=TMEM165 PE=1 SV=1	1	4	3	2	6.3224	2.63449	20.0457	14.0132	2.87876e-07	1.03892e-06	7.52737	0.988989	1	1	WT - Control	limma	2.87876e-07	1.03892e-06	TRUE	hit	6.3224
657	NOB1	Q9ULX3	RNA-binding protein NOB1 OS=Homo sapiens GN=NOB1 PE=1 SV=1	1	4	3	4	5.85431	2.4162	20.6553	14.0113	2.88212e-07	1.03892e-06	7.52617	0.988991	1	1	WT - Control	limma	2.88212e-07	1.03892e-06	TRUE	hit	5.85431
658	SLC25A5	P05141	ADP/ATP translocase 2 OS=Homo sapiens GN=SLC25A5 PE=1 SV=7	1	4	3	5	6.69481	3.78879	21.2626	14.0088	2.8864e-07	1.03892e-06	7.52465	0.988993	1	1	WT - Control	limma	2.8864e-07	1.03892e-06	TRUE	hit	6.69481
659	MCM3	P25205|P25205-2	DNA replication licensing factor MCM3 OS=Homo sapiens GN=MCM3 PE=1 SV=3|Isoform 2 of DNA replication licensing factor MCM3 OS=Homo sapiens GN=MCM3	1	4	3	19	6.58011	2.42006	24.0613	14.0002	2.90116e-07	1.04257e-06	7.51941	0.989	1	1	WT - Control	limma	2.90116e-07	1.04257e-06	TRUE	hit	6.58011
660	GCAT	O75600|O75600-2	2-amino-3-ketobutyrate coenzyme A ligase, mitochondrial OS=Homo sapiens GN=GCAT PE=1 SV=1|Isoform 2 of 2-amino-3-ketobutyrate coenzyme A ligase, mitochondrial OS=Homo sapiens GN=GCAT	1	4	3	4	6.47901	3.34708	20.7073	13.9843	2.92895e-07	1.0509e-06	7.50961	0.989012	1	1	WT - Control	limma	2.92895e-07	1.0509e-06	TRUE	hit	6.47901
661	MAN1A1	P33908	Mannosyl-oligosaccharide 1,2-alpha-mannosidase IA OS=Homo sapiens GN=MAN1A1 PE=1 SV=3	1	4	3	2	5.98008	2.52508	21.3282	13.9656	2.96191e-07	1.06056e-06	7.49811	0.989027	1	1	WT - Control	limma	2.96191e-07	1.06056e-06	TRUE	hit	5.98008
662	MYC	A0A087WUS5|H0YBT0|P01106|P01106-2	Myc proto-oncogene protein OS=Homo sapiens GN=MYC PE=1 SV=1|Myc proto-oncogene protein OS=Homo sapiens GN=MYC PE=1 SV=1|Myc proto-oncogene protein OS=Homo sapiens GN=MYC PE=1 SV=1|Isoform 2 of Myc proto-oncogene protein OS=Homo sapiens GN=MYC	1	4	3	2	5.95329	2.83795	20.1652	13.9637	2.96526e-07	1.06056e-06	7.49695	0.989028	1	1	WT - Control	limma	2.96526e-07	1.06056e-06	TRUE	hit	5.95329
663	SRPRB	Q9Y5M8	Signal recognition particle receptor subunit beta OS=Homo sapiens GN=SRPRB PE=1 SV=3	1	4	3	3	6.38813	3.50594	21.3455	13.9554	9.69905e-07	2.49814e-06	6.45092	0.989035	1	1	WT - Control	limma	9.69905e-07	2.49814e-06	TRUE	hit	6.38813
664	MYO9A	B2RTY4|B2RTY4-2|B2RTY4-4|H3BRD5	Unconventional myosin-IXa OS=Homo sapiens GN=MYO9A PE=1 SV=2|Isoform 2 of Unconventional myosin-IXa OS=Homo sapiens GN=MYO9A|Isoform 4 of Unconventional myosin-IXa OS=Homo sapiens GN=MYO9A|Unconventional myosin-IXa OS=Homo sapiens GN=MYO9A PE=1 SV=1	1	4	3	10	6.09929	2.86781	22.2255	13.9482	2.99285e-07	1.06874e-06	7.48742	0.98904	1	1	WT - Control	limma	2.99285e-07	1.06874e-06	TRUE	hit	6.09929
665	PRPF8	Q6P2Q9	Pre-mRNA-processing-splicing factor 8 OS=Homo sapiens GN=PRPF8 PE=1 SV=2	1	4	3	28	7.11171	2.54645	24.8097	13.9431	3.00209e-07	1.07035e-06	7.48425	0.989044	1	1	WT - Control	limma	3.00209e-07	1.07035e-06	TRUE	hit	7.11171
666	ASNS	P08243|P08243-2	Asparagine synthetase [glutamine-hydrolyzing] OS=Homo sapiens GN=ASNS PE=1 SV=4|Isoform 2 of Asparagine synthetase [glutamine-hydrolyzing] OS=Homo sapiens GN=ASNS	1	4	3	5	6.99106	2.93063	23.2821	13.922	3.04033e-07	1.08228e-06	7.47124	0.989061	1	1	WT - Control	limma	3.04033e-07	1.08228e-06	TRUE	hit	6.99106
667	CSE1L	P55060|P55060-3	Exportin-2 OS=Homo sapiens GN=CSE1L PE=1 SV=3|Isoform 3 of Exportin-2 OS=Homo sapiens GN=CSE1L	1	4	3	12	6.94558	3.66962	23.8854	13.9096	3.06297e-07	1.08692e-06	7.46361	0.989071	1	1	WT - Control	limma	3.06297e-07	1.08692e-06	TRUE	hit	6.94558
668	DIDO1	Q9BTC0	Death-inducer obliterator 1 OS=Homo sapiens GN=DIDO1 PE=1 SV=5	1	4	3	4	5.90837	2.76853	21.0659	13.8695	3.13774e-07	1.11171e-06	7.4388	0.989102	1	1	WT - Control	limma	3.13774e-07	1.11171e-06	TRUE	hit	5.90837
669	TMEM223	A0PJW6	Transmembrane protein 223 OS=Homo sapiens GN=TMEM223 PE=1 SV=1	1	4	3	2	6.35673	3.56471	20.9362	13.8673	1.01666e-06	2.60115e-06	6.40347	0.989104	1	1	WT - Control	limma	1.01666e-06	2.60115e-06	TRUE	hit	6.35673
670	DECR2	Q9NUI1|Q9NUI1-3	Peroxisomal 2,4-dienoyl-CoA reductase OS=Homo sapiens GN=DECR2 PE=1 SV=1|Isoform 3 of Peroxisomal 2,4-dienoyl-CoA reductase OS=Homo sapiens GN=DECR2	1	4	3	2	5.93521	2.84055	20.2186	13.8663	3.14382e-07	1.11213e-06	7.43681	0.989105	1	1	WT - Control	limma	3.14382e-07	1.11213e-06	TRUE	hit	5.93521
671	ATP1A1	P05023|P05023-4	Sodium/potassium-transporting ATPase subunit alpha-1 OS=Homo sapiens GN=ATP1A1 PE=1 SV=1|Isoform 4 of Sodium/potassium-transporting ATPase subunit alpha-1 OS=Homo sapiens GN=ATP1A1	1	4	3	9	7.0308	3.66401	22.7752	13.8513	3.17245e-07	1.1205e-06	7.42748	0.989117	1	1	WT - Control	limma	3.17245e-07	1.1205e-06	TRUE	hit	7.0308
672	NEU3	Q9UQ49|Q9UQ49-2	Sialidase-3 OS=Homo sapiens GN=NEU3 PE=1 SV=1|Isoform 2 of Sialidase-3 OS=Homo sapiens GN=NEU3	1	4	3	4	5.925	3.04962	20.005	13.8488	1.02683e-06	2.61796e-06	6.39342	0.989119	1	1	WT - Control	limma	1.02683e-06	2.61796e-06	TRUE	hit	5.925
673	TMED5	Q9Y3A6	Transmembrane emp24 domain-containing protein 5 OS=Homo sapiens GN=TMED5 PE=1 SV=1	1	4	3	2	6.31612	3.0736	20.9261	13.8343	3.20512e-07	1.13028e-06	7.41694	0.98913	1	1	WT - Control	limma	3.20512e-07	1.13028e-06	TRUE	hit	6.31612
674	DNAJA1	P31689	DnaJ homolog subfamily A member 1 OS=Homo sapiens GN=DNAJA1 PE=1 SV=2	1	4	3	6	7.00522	4.35171	22.4374	13.8256	3.22211e-07	1.1345e-06	7.41149	0.989137	1	1	WT - Control	limma	3.22211e-07	1.1345e-06	TRUE	hit	7.00522
675	TOR1AIP2	Q8NFQ8	Torsin-1A-interacting protein 2 OS=Homo sapiens GN=TOR1AIP2 PE=1 SV=1	1	4	3	3	6.24669	2.36089	21.297	13.8208	3.23139e-07	1.136e-06	7.40853	0.989141	1	1	WT - Control	limma	3.23139e-07	1.136e-06	TRUE	hit	6.24669
676	SEC61A2	Q9H9S3|Q9H9S3-3	Protein transport protein Sec61 subunit alpha isoform 2 OS=Homo sapiens GN=SEC61A2 PE=2 SV=3|Isoform 3 of Protein transport protein Sec61 subunit alpha isoform 2 OS=Homo sapiens GN=SEC61A2	1	4	3	3	6.03674	3.76592	20.8213	13.815	3.24267e-07	1.1382e-06	7.40495	0.989145	1	1	WT - Control	limma	3.24267e-07	1.1382e-06	TRUE	hit	6.03674
677	PIK3R2	O00459	Phosphatidylinositol 3-kinase regulatory subunit beta OS=Homo sapiens GN=PIK3R2 PE=1 SV=2	1	4	3	6	6.31547	3.72233	21.6187	13.8095	3.25355e-07	1.13946e-06	7.4015	0.989149	1	1	WT - Control	limma	3.25355e-07	1.13946e-06	TRUE	hit	6.31547
678	NMT1	K7EN82|P30419|P30419-2	Glycylpeptide N-tetradecanoyltransferase 1 (Fragment) OS=Homo sapiens GN=NMT1 PE=1 SV=1|Glycylpeptide N-tetradecanoyltransferase 1 OS=Homo sapiens GN=NMT1 PE=1 SV=2|Isoform Short of Glycylpeptide N-tetradecanoyltransferase 1 OS=Homo sapiens GN=NMT1	1	4	3	2	6.12056	2.4066	21.8469	13.8046	3.26321e-07	1.13946e-06	7.39845	0.989153	1	1	WT - Control	limma	3.26321e-07	1.13946e-06	TRUE	hit	6.12056
679	MAD2L1	Q13257	Mitotic spindle assembly checkpoint protein MAD2A OS=Homo sapiens GN=MAD2L1 PE=1 SV=1	1	4	3	6	6.97246	5.61104	22.3949	13.8011	3.27011e-07	1.13946e-06	7.39627	0.989156	1	1	WT - Control	limma	3.27011e-07	1.13946e-06	TRUE	hit	6.97246
680	MED27	Q6P2C8	Mediator of RNA polymerase II transcription subunit 27 OS=Homo sapiens GN=MED27 PE=1 SV=1	1	4	3	2	6.0658	2.50807	20.6185	13.8004	3.27142e-07	1.13946e-06	7.39586	0.989157	1	1	WT - Control	limma	3.27142e-07	1.13946e-06	TRUE	hit	6.0658
681	ELP3	Q9H9T3|Q9H9T3-2	Elongator complex protein 3 OS=Homo sapiens GN=ELP3 PE=1 SV=2|Isoform 2 of Elongator complex protein 3 OS=Homo sapiens GN=ELP3	1	4	3	7	6.30376	3.01305	21.7837	13.7913	3.28953e-07	1.14401e-06	7.39018	0.989164	1	1	WT - Control	limma	3.28953e-07	1.14401e-06	TRUE	hit	6.30376
682	RUSC2	Q8N2Y8	Iporin OS=Homo sapiens GN=RUSC2 PE=1 SV=3	1	4	3	4	5.83977	2.98066	21.1016	13.7886	3.29497e-07	1.14414e-06	7.38847	0.989166	1	1	WT - Control	limma	3.29497e-07	1.14414e-06	TRUE	hit	5.83977
683	SUCLG2	E9PDQ8|Q96I99	Succinyl-CoA ligase [GDP-forming] subunit beta, mitochondrial OS=Homo sapiens GN=SUCLG2 PE=1 SV=1|Succinyl-CoA ligase [GDP-forming] subunit beta, mitochondrial OS=Homo sapiens GN=SUCLG2 PE=1 SV=2	1	4	3	6	6.51557	3.1953	22.4085	13.7798	3.31262e-07	1.14851e-06	7.38297	0.989173	1	1	WT - Control	limma	3.31262e-07	1.14851e-06	TRUE	hit	6.51557
684	STK39	Q9UEW8|Q9UEW8-2	STE20/SPS1-related proline-alanine-rich protein kinase OS=Homo sapiens GN=STK39 PE=1 SV=3|Isoform 2 of STE20/SPS1-related proline-alanine-rich protein kinase OS=Homo sapiens GN=STK39	1	4	3	2	6.38917	2.8512	21.568	13.774	1.06895e-06	2.70102e-06	6.35284	0.989177	1	1	WT - Control	limma	1.06895e-06	2.70102e-06	TRUE	hit	6.38917
685	HM13	Q8TCT9|Q8TCT9-5	Minor histocompatibility antigen H13 OS=Homo sapiens GN=HM13 PE=1 SV=1|Isoform 5 of Minor histocompatibility antigen H13 OS=Homo sapiens GN=HM13	1	4	3	2	6.71054	4.60501	22.243	13.7627	3.34713e-07	1.15793e-06	7.3723	0.989186	1	1	WT - Control	limma	3.34713e-07	1.15793e-06	TRUE	hit	6.71054
686	TSC22D3	Q99576	TSC22 domain family protein 3 OS=Homo sapiens GN=TSC22D3 PE=1 SV=2	1	4	3	3	6.13194	4.06023	21.716	13.7613	3.35002e-07	1.15793e-06	7.37141	0.989187	1	1	WT - Control	limma	3.35002e-07	1.15793e-06	TRUE	hit	6.13194
687	TMTC3	Q6ZXV5|Q6ZXV5-2	Transmembrane and TPR repeat-containing protein 3 OS=Homo sapiens GN=TMTC3 PE=1 SV=2|Isoform 2 of Transmembrane and TPR repeat-containing protein 3 OS=Homo sapiens GN=TMTC3	1	4	3	4	5.94513	4.01203	21.6387	13.7554	3.36194e-07	1.16028e-06	7.36775	0.989192	1	1	WT - Control	limma	3.36194e-07	1.16028e-06	TRUE	hit	5.94513
688	TBC1D9B	Q66K14|Q66K14-2	TBC1 domain family member 9B OS=Homo sapiens GN=TBC1D9B PE=1 SV=3|Isoform 2 of TBC1 domain family member 9B OS=Homo sapiens GN=TBC1D9B	1	4	3	8	6.20905	3.37857	22.043	13.7523	3.36824e-07	1.16068e-06	7.36582	0.989194	1	1	WT - Control	limma	3.36824e-07	1.16068e-06	TRUE	hit	6.20905
689	BCOR	Q6W2J9|Q6W2J9-2|Q6W2J9-4	BCL-6 corepressor OS=Homo sapiens GN=BCOR PE=1 SV=1|Isoform 2 of BCL-6 corepressor OS=Homo sapiens GN=BCOR|Isoform 4 of BCL-6 corepressor OS=Homo sapiens GN=BCOR	1	4	3	4	5.86738	2.95364	21.2361	13.7438	1.08653e-06	2.73626e-06	6.33637	0.989201	1	1	WT - Control	limma	1.08653e-06	2.73626e-06	TRUE	hit	5.86738
690	NCAPG2	Q86XI2|Q86XI2-2	Condensin-2 complex subunit G2 OS=Homo sapiens GN=NCAPG2 PE=1 SV=1|Isoform 2 of Condensin-2 complex subunit G2 OS=Homo sapiens GN=NCAPG2	1	4	3	8	6.72581	3.96715	23.027	13.7401	3.39333e-07	1.16755e-06	7.35818	0.989204	1	1	WT - Control	limma	3.39333e-07	1.16755e-06	TRUE	hit	6.72581
691	LATS1	O95835	Serine/threonine-protein kinase LATS1 OS=Homo sapiens GN=LATS1 PE=1 SV=1	1	4	3	3	5.97631	2.86946	21.2554	13.7364	1.09086e-06	2.74107e-06	6.33235	0.989207	1	1	WT - Control	limma	1.09086e-06	2.74107e-06	TRUE	hit	5.97631
692	MRPL37	Q9BZE1|S4R369	39S ribosomal protein L37, mitochondrial OS=Homo sapiens GN=MRPL37 PE=1 SV=2|39S ribosomal protein L37, mitochondrial OS=Homo sapiens GN=MRPL37 PE=1 SV=1	1	4	3	3	6.65094	4.05664	21.9325	13.7247	3.42522e-07	1.17674e-06	7.34854	0.989216	1	1	WT - Control	limma	3.42522e-07	1.17674e-06	TRUE	hit	6.65094
693	MTHFD1	P11586	C-1-tetrahydrofolate synthase, cytoplasmic OS=Homo sapiens GN=MTHFD1 PE=1 SV=3	1	4	3	26	7.26173	3.03491	25.1529	13.7199	3.43537e-07	1.17844e-06	7.34549	0.98922	1	1	WT - Control	limma	3.43537e-07	1.17844e-06	TRUE	hit	7.26173
694	ZNF644	Q9H582	Zinc finger protein 644 OS=Homo sapiens GN=ZNF644 PE=1 SV=2	1	4	3	7	5.87572	2.84755	21.7977	13.7113	3.45341e-07	1.18268e-06	7.3401	0.989227	1	1	WT - Control	limma	3.45341e-07	1.18268e-06	TRUE	hit	5.87572
695	HEATR6	A0A087WXZ7|K7EIX2|Q6AI08	HEAT repeat-containing protein 6 OS=Homo sapiens GN=HEATR6 PE=1 SV=1|HEAT repeat-containing protein 6 OS=Homo sapiens GN=HEATR6 PE=1 SV=1|HEAT repeat-containing protein 6 OS=Homo sapiens GN=HEATR6 PE=1 SV=1	1	4	3	5	6.53483	4.25389	21.3075	13.7072	3.46196e-07	1.18268e-06	7.33755	0.98923	1	1	WT - Control	limma	3.46196e-07	1.18268e-06	TRUE	hit	6.53483
696	INTS3	Q68E01-2	Isoform 2 of Integrator complex subunit 3 OS=Homo sapiens GN=INTS3	1	4	3	4	5.93262	3.31109	20.414	13.7065	3.46342e-07	1.18268e-06	7.33711	0.98923	1	1	WT - Control	limma	3.46342e-07	1.18268e-06	TRUE	hit	5.93262
697	SCARB2	Q14108	Lysosome membrane protein 2 OS=Homo sapiens GN=SCARB2 PE=1 SV=2	1	4	3	4	6.74862	5.82939	20.803	13.6975	1.11409e-06	2.784e-06	6.31105	0.989237	1	1	WT - Control	limma	1.11409e-06	2.784e-06	TRUE	hit	6.74862
698	RBM14	Q96PK6	RNA-binding protein 14 OS=Homo sapiens GN=RBM14 PE=1 SV=2	1	4	3	10	6.58969	2.89223	22.5543	13.6791	3.52176e-07	1.20079e-06	7.3199	0.989252	1	1	WT - Control	limma	3.52176e-07	1.20079e-06	TRUE	hit	6.58969
699	PAN3	A0A0C4DFZ9|Q58A45|Q58A45-2|Q58A45-3	PAB-dependent poly(A)-specific ribonuclease subunit PAN3 OS=Homo sapiens GN=PAN3 PE=1 SV=1|PAB-dependent poly(A)-specific ribonuclease subunit PAN3 OS=Homo sapiens GN=PAN3 PE=1 SV=3|Isoform 2 of PAB-dependent poly(A)-specific ribonuclease subunit PAN3 OS=Homo sapiens GN=PAN3|Isoform 3 of PAB-dependent poly(A)-specific ribonuclease subunit PAN3 OS=Homo sapiens GN=PAN3	1	4	3	3	5.81541	2.78813	21.0713	13.673	3.53494e-07	1.20347e-06	7.31605	0.989257	1	1	WT - Control	limma	3.53494e-07	1.20347e-06	TRUE	hit	5.81541
700	NO66	Q9H6W3	Bifunctional lysine-specific demethylase and histidyl-hydroxylase NO66 OS=Homo sapiens GN=NO66 PE=1 SV=2	1	4	3	5	6.19653	2.62517	20.5316	13.667	3.54776e-07	1.20603e-06	7.31232	0.989261	1	1	WT - Control	limma	3.54776e-07	1.20603e-06	TRUE	hit	6.19653
701	VPS16	Q9H269	Vacuolar protein sorting-associated protein 16 homolog OS=Homo sapiens GN=VPS16 PE=1 SV=2	1	4	3	4	6.0478	2.82382	20.944	13.6502	1.1431e-06	2.84393e-06	6.28505	0.989275	1	1	WT - Control	limma	1.1431e-06	2.84393e-06	TRUE	hit	6.0478
702	I3L4J1|VPS4A	I3L4J1|Q9UN37	Uncharacterized protein (Fragment) OS=Homo sapiens PE=1 SV=3|Vacuolar protein sorting-associated protein 4A OS=Homo sapiens GN=VPS4A PE=1 SV=1	1	4	3	4	6.6829	4.03466	21.2902	13.6353	3.61728e-07	1.22658e-06	7.29231	0.989286	1	1	WT - Control	limma	3.61728e-07	1.22658e-06	TRUE	hit	6.6829
703	PCK2	Q16822	Phosphoenolpyruvate carboxykinase [GTP], mitochondrial OS=Homo sapiens GN=PCK2 PE=1 SV=3	1	4	3	3	6.13748	2.86902	20.7525	13.6345	3.61905e-07	1.22658e-06	7.2918	0.989287	1	1	WT - Control	limma	3.61905e-07	1.22658e-06	TRUE	hit	6.13748
704	MAP1S	Q66K74|Q66K74-2	Microtubule-associated protein 1S OS=Homo sapiens GN=MAP1S PE=1 SV=2|Isoform 2 of Microtubule-associated protein 1S OS=Homo sapiens GN=MAP1S	1	4	3	4	6.22022	2.55158	21.4799	13.6285	3.63242e-07	1.22927e-06	7.288	0.989292	1	1	WT - Control	limma	3.63242e-07	1.22927e-06	TRUE	hit	6.22022
705	RANBP2	P49792	E3 SUMO-protein ligase RanBP2 OS=Homo sapiens GN=RANBP2 PE=1 SV=2	1	4	3	16	6.56148	2.62796	23.7384	13.6237	3.64303e-07	1.22964e-06	7.28499	0.989295	1	1	WT - Control	limma	3.64303e-07	1.22964e-06	TRUE	hit	6.56148
706	PDE10A	Q9Y233|Q9Y233-2	cAMP and cAMP-inhibited cGMP 3',5'-cyclic phosphodiesterase 10A OS=Homo sapiens GN=PDE10A PE=1 SV=1|Isoform PDE10A2 of cAMP and cAMP-inhibited cGMP 3',5'-cyclic phosphodiesterase 10A OS=Homo sapiens GN=PDE10A	1	4	3	4	5.69492	3.4121	20.7899	13.6226	3.6455e-07	1.22964e-06	7.28429	0.989296	1	1	WT - Control	limma	3.6455e-07	1.22964e-06	TRUE	hit	5.69492
707	LSM14B	Q5TBQ0|Q9BX40-2	Protein LSM14 homolog B (Fragment) OS=Homo sapiens GN=LSM14B PE=1 SV=1|Isoform 2 of Protein LSM14 homolog B OS=Homo sapiens GN=LSM14B	1	4	3	3	5.78	2.98346	20.4594	13.6178	3.65622e-07	1.22964e-06	7.28127	0.9893	1	1	WT - Control	limma	3.65622e-07	1.22964e-06	TRUE	hit	5.78
708	AIMP1	Q12904|Q12904-2	Aminoacyl tRNA synthase complex-interacting multifunctional protein 1 OS=Homo sapiens GN=AIMP1 PE=1 SV=2|Isoform 2 of Aminoacyl tRNA synthase complex-interacting multifunctional protein 1 OS=Homo sapiens GN=AIMP1	1	4	3	6	6.41306	2.90594	22.5223	13.6159	3.66059e-07	1.22964e-06	7.28004	0.989302	1	1	WT - Control	limma	3.66059e-07	1.22964e-06	TRUE	hit	6.41306
709	AHSA1	O95433	Activator of 90 kDa heat shock protein ATPase homolog 1 OS=Homo sapiens GN=AHSA1 PE=1 SV=1	1	4	3	4	6.59615	3.71813	22.1754	13.6144	3.66392e-07	1.22964e-06	7.2791	0.989303	1	1	WT - Control	limma	3.66392e-07	1.22964e-06	TRUE	hit	6.59615
710	NOL9	Q5SY16	Polynucleotide 5'-hydroxyl-kinase NOL9 OS=Homo sapiens GN=NOL9 PE=1 SV=1	1	4	3	4	6.73452	3.54989	22.5622	13.6134	3.6661e-07	1.22964e-06	7.27848	0.989303	1	1	WT - Control	limma	3.6661e-07	1.22964e-06	TRUE	hit	6.73452
711	PCCB	C9JQS9|E7ETT1|E7ETT4|E7EX59|E9PDR0|P05166|P05166-2	Propionyl-CoA carboxylase beta chain, mitochondrial OS=Homo sapiens GN=PCCB PE=1 SV=1|Propionyl-CoA carboxylase beta chain, mitochondrial OS=Homo sapiens GN=PCCB PE=1 SV=1|Propionyl-CoA carboxylase beta chain, mitochondrial OS=Homo sapiens GN=PCCB PE=1 SV=1|Propionyl-CoA carboxylase beta chain, mitochondrial OS=Homo sapiens GN=PCCB PE=1 SV=1|Propionyl-CoA carboxylase beta chain, mitochondrial OS=…	1	4	3	4	5.94473	2.96853	20.6909	13.6095	3.67501e-07	1.2308e-06	7.27598	0.989307	1	1	WT - Control	limma	3.67501e-07	1.2308e-06	TRUE	hit	5.94473
712	GALNT11	Q8NCW6	Polypeptide N-acetylgalactosaminyltransferase 11 OS=Homo sapiens GN=GALNT11 PE=1 SV=2	1	4	3	9	6.54311	2.42898	23.5388	13.6039	3.68749e-07	1.23316e-06	7.27248	0.989311	1	1	WT - Control	limma	3.68749e-07	1.23316e-06	TRUE	hit	6.54311
713	GAA	P10253	Lysosomal alpha-glucosidase OS=Homo sapiens GN=GAA PE=1 SV=4	1	4	3	5	5.89807	2.9396	21.4896	13.6025	1.17314e-06	2.90271e-06	6.2588	0.989312	1	1	WT - Control	limma	1.17314e-06	2.90271e-06	TRUE	hit	5.89807
714	ZNF655	Q8N720|Q8N720-3	Zinc finger protein 655 OS=Homo sapiens GN=ZNF655 PE=1 SV=3|Isoform 3 of Zinc finger protein 655 OS=Homo sapiens GN=ZNF655	1	4	3	3	6.27269	3.43293	20.634	13.5972	3.70281e-07	1.23645e-06	7.26821	0.989316	1	1	WT - Control	limma	3.70281e-07	1.23645e-06	TRUE	hit	6.27269
715	MLEC	F5H1S8|Q14165	Malectin (Fragment) OS=Homo sapiens GN=MLEC PE=1 SV=1|Malectin OS=Homo sapiens GN=MLEC PE=1 SV=1	1	4	3	3	5.84391	2.71351	20.9734	13.5663	3.77369e-07	1.25827e-06	7.24865	0.989341	1	1	WT - Control	limma	3.77369e-07	1.25827e-06	TRUE	hit	5.84391
716	GMDS	O60547|O60547-2	GDP-mannose 4,6 dehydratase OS=Homo sapiens GN=GMDS PE=1 SV=1|Isoform 2 of GDP-mannose 4,6 dehydratase OS=Homo sapiens GN=GMDS	1	4	3	5	6.33635	2.73828	21.3206	13.562	3.78361e-07	1.25972e-06	7.24594	0.989344	1	1	WT - Control	limma	3.78361e-07	1.25972e-06	TRUE	hit	6.33635
717	LRPPRC	P42704	Leucine-rich PPR motif-containing protein, mitochondrial OS=Homo sapiens GN=LRPPRC PE=1 SV=3	1	4	3	21	6.96945	3.26946	24.3002	13.5552	3.79955e-07	1.26317e-06	7.2416	0.989349	1	1	WT - Control	limma	3.79955e-07	1.26317e-06	TRUE	hit	6.96945
718	ARMC6	Q6NXE6|Q6NXE6-2	Armadillo repeat-containing protein 6 OS=Homo sapiens GN=ARMC6 PE=1 SV=2|Isoform 2 of Armadillo repeat-containing protein 6 OS=Homo sapiens GN=ARMC6	1	4	3	2	5.99425	3.29222	21.3656	13.5192	3.88477e-07	1.28772e-06	7.2187	0.989378	1	1	WT - Control	limma	3.88477e-07	1.28772e-06	TRUE	hit	5.99425
719	CDK16|CDK17	A0A087WZU2|E5RGN0|F5H6Z0|Q00536|Q00536-2|Q00536-3|Q00537|Q00537-2	Cyclin-dependent kinase 16 OS=Homo sapiens GN=CDK16 PE=1 SV=1|Cyclin-dependent kinase 16 (Fragment) OS=Homo sapiens GN=CDK16 PE=1 SV=1|Cyclin-dependent kinase 17 OS=Homo sapiens GN=CDK17 PE=1 SV=1|Cyclin-dependent kinase 16 OS=Homo sapiens GN=CDK16 PE=1 SV=1|Isoform 2 of Cyclin-dependent kinase 16 OS=Homo sapiens GN=CDK16|Isoform 3 of Cyclin-dependent kinase 16 OS=Homo sapiens GN=CDK16|Cyclin-dep…	1	4	3	2	6.177	2.43734	20.7333	13.514	3.8972e-07	1.28995e-06	7.21541	0.989382	1	1	WT - Control	limma	3.8972e-07	1.28995e-06	TRUE	hit	6.177
720	GLA	P06280	Alpha-galactosidase A OS=Homo sapiens GN=GLA PE=1 SV=1	1	4	3	3	6.00411	2.61646	21.4603	13.5088	3.90966e-07	1.29036e-06	7.21211	0.989386	1	1	WT - Control	limma	3.90966e-07	1.29036e-06	TRUE	hit	6.00411
721	TRIP13	Q15645	Pachytene checkpoint protein 2 homolog OS=Homo sapiens GN=TRIP13 PE=1 SV=2	1	4	3	9	7.30962	4.28506	22.6251	13.508	3.91177e-07	1.29036e-06	7.21155	0.989386	1	1	WT - Control	limma	3.91177e-07	1.29036e-06	TRUE	hit	7.30962
722	WDR60	Q8WVS4	WD repeat-containing protein 60 OS=Homo sapiens GN=WDR60 PE=1 SV=3	1	4	3	9	6.53274	3.91552	21.9468	13.5064	3.91554e-07	1.29036e-06	7.21056	0.989388	1	1	WT - Control	limma	3.91554e-07	1.29036e-06	TRUE	hit	6.53274
723	SLC27A4	Q6P1M0	Long-chain fatty acid transport protein 4 OS=Homo sapiens GN=SLC27A4 PE=1 SV=1	1	4	3	4	6.44646	2.93927	21.5355	13.4998	3.93151e-07	1.29374e-06	7.20636	0.989393	1	1	WT - Control	limma	3.93151e-07	1.29374e-06	TRUE	hit	6.44646
724	NOP14	P78316	Nucleolar protein 14 OS=Homo sapiens GN=NOP14 PE=1 SV=3	1	4	3	6	6.04416	2.2788	22.3174	13.4947	3.944e-07	1.29411e-06	7.20308	0.989397	1	1	WT - Control	limma	3.944e-07	1.29411e-06	TRUE	hit	6.04416
725	RARS	P54136	Arginine--tRNA ligase, cytoplasmic OS=Homo sapiens GN=RARS PE=1 SV=2	1	4	3	9	6.58618	2.5683	22.6868	13.4917	3.95116e-07	1.29456e-06	7.20121	0.989399	1	1	WT - Control	limma	3.95116e-07	1.29456e-06	TRUE	hit	6.58618
726	AGK	E9PC15|Q53H12	Acylglycerol kinase, mitochondrial OS=Homo sapiens GN=AGK PE=1 SV=1|Acylglycerol kinase, mitochondrial OS=Homo sapiens GN=AGK PE=1 SV=2	1	4	3	6	6.69857	3.70736	22.0067	13.4683	4.00877e-07	1.31007e-06	7.18626	0.989417	1	1	WT - Control	limma	4.00877e-07	1.31007e-06	TRUE	hit	6.69857
727	DSE	Q9UL01	Dermatan-sulfate epimerase OS=Homo sapiens GN=DSE PE=1 SV=1	1	4	3	3	5.77158	4.42661	21.6482	13.4478	4.06014e-07	1.32452e-06	7.17311	0.989434	1	1	WT - Control	limma	4.06014e-07	1.32452e-06	TRUE	hit	5.77158
728	PDPR	A8MT40|Q8NCN5	Pyruvate dehydrogenase phosphatase regulatory subunit, mitochondrial OS=Homo sapiens GN=PDPR PE=1 SV=2|Pyruvate dehydrogenase phosphatase regulatory subunit, mitochondrial OS=Homo sapiens GN=PDPR PE=1 SV=2	1	4	3	2	5.98499	3.16701	20.5199	13.4342	4.09445e-07	1.33147e-06	7.16442	0.989444	1	1	WT - Control	limma	4.09445e-07	1.33147e-06	TRUE	hit	5.98499
729	ATF6	P18850	Cyclic AMP-dependent transcription factor ATF-6 alpha OS=Homo sapiens GN=ATF6 PE=1 SV=3	1	4	3	4	6.12854	3.24945	20.7536	13.4324	4.0991e-07	1.33147e-06	7.16325	0.989446	1	1	WT - Control	limma	4.0991e-07	1.33147e-06	TRUE	hit	6.12854
730	ZNF260	Q3ZCT1	Zinc finger protein 260 OS=Homo sapiens GN=ZNF260 PE=1 SV=3	1	4	3	2	6.31073	2.8051	21.2696	13.4242	4.11991e-07	1.33631e-06	7.15801	0.989452	1	1	WT - Control	limma	4.11991e-07	1.33631e-06	TRUE	hit	6.31073
731	ASCC1	Q8N9N2|Q8N9N2-2	Activating signal cointegrator 1 complex subunit 1 OS=Homo sapiens GN=ASCC1 PE=1 SV=1|Isoform 2 of Activating signal cointegrator 1 complex subunit 1 OS=Homo sapiens GN=ASCC1	1	4	3	2	5.86558	2.80127	20.7426	13.4177	4.13668e-07	1.33983e-06	7.15382	0.989457	1	1	WT - Control	limma	4.13668e-07	1.33983e-06	TRUE	hit	5.86558
732	DCAF7	P61962	DDB1- and CUL4-associated factor 7 OS=Homo sapiens GN=DCAF7 PE=1 SV=1	1	4	3	4	6.8738	2.32844	22.8703	13.4093	4.15816e-07	1.34295e-06	7.14847	0.989464	1	1	WT - Control	limma	4.15816e-07	1.34295e-06	TRUE	hit	6.8738
733	RFT1	B5MDE0|Q96AA3	Protein RFT1 homolog OS=Homo sapiens GN=RFT1 PE=1 SV=1|Protein RFT1 homolog OS=Homo sapiens GN=RFT1 PE=1 SV=1	1	4	3	2	6.21443	2.97301	20.5937	13.3966	1.3137e-06	3.18415e-06	6.14409	0.989474	1	1	WT - Control	limma	1.3137e-06	3.18415e-06	TRUE	hit	6.21443
734	AP4B1	B1ALD0|Q9Y6B7	AP complex subunit beta OS=Homo sapiens GN=AP4B1 PE=1 SV=1|AP-4 complex subunit beta-1 OS=Homo sapiens GN=AP4B1 PE=1 SV=2	1	4	3	2	5.52036	3.30872	20.1658	13.3948	1.31501e-06	3.18415e-06	6.14308	0.989475	1	1	WT - Control	limma	1.31501e-06	3.18415e-06	TRUE	hit	5.52036
735	PI4KA	J3KN10|P42356	Phosphatidylinositol 4-kinase alpha OS=Homo sapiens GN=PI4KA PE=1 SV=1|Phosphatidylinositol 4-kinase alpha OS=Homo sapiens GN=PI4KA PE=1 SV=4	1	4	3	15	6.6107	2.70543	23.4069	13.378	4.24007e-07	1.36738e-06	7.12831	0.989488	1	1	WT - Control	limma	4.24007e-07	1.36738e-06	TRUE	hit	6.6107
736	PIGT	Q969N2|Q969N2-4|Q969N2-5	GPI transamidase component PIG-T OS=Homo sapiens GN=PIGT PE=1 SV=1|Isoform 4 of GPI transamidase component PIG-T OS=Homo sapiens GN=PIGT|Isoform 5 of GPI transamidase component PIG-T OS=Homo sapiens GN=PIGT	1	4	3	3	6.48291	3.97356	20.8312	13.3758	4.2459e-07	1.36738e-06	7.12689	0.98949	1	1	WT - Control	limma	4.2459e-07	1.36738e-06	TRUE	hit	6.48291
737	EDEM3	Q9BZQ6|Q9BZQ6-2	ER degradation-enhancing alpha-mannosidase-like protein 3 OS=Homo sapiens GN=EDEM3 PE=1 SV=2|Isoform 2 of ER degradation-enhancing alpha-mannosidase-like protein 3 OS=Homo sapiens GN=EDEM3	1	4	3	6	6.43866	3.05088	21.2776	13.3734	4.25213e-07	1.36745e-06	7.12537	0.989492	1	1	WT - Control	limma	4.25213e-07	1.36745e-06	TRUE	hit	6.43866
738	IDH3B	A0A087WZN1|A0A087X2E5|O43837|O43837-2	Isocitrate dehydrogenase [NAD] subunit, mitochondrial OS=Homo sapiens GN=IDH3B PE=1 SV=1|Isocitrate dehydrogenase [NAD] subunit, mitochondrial OS=Homo sapiens GN=IDH3B PE=1 SV=1|Isocitrate dehydrogenase [NAD] subunit beta, mitochondrial OS=Homo sapiens GN=IDH3B PE=1 SV=2|Isoform A of Isocitrate dehydrogenase [NAD] subunit beta, mitochondrial OS=Homo sapiens GN=IDH3B	1	4	3	4	6.6884	2.78463	21.7513	13.3559	4.29867e-07	1.38045e-06	7.11412	0.989506	1	1	WT - Control	limma	4.29867e-07	1.38045e-06	TRUE	hit	6.6884
739	WFS1	O76024	Wolframin OS=Homo sapiens GN=WFS1 PE=1 SV=2	1	4	3	2	5.6929	2.66109	19.6499	13.3289	4.37173e-07	1.39999e-06	7.09669	0.989527	1	1	WT - Control	limma	4.37173e-07	1.39999e-06	TRUE	hit	5.6929
740	RPS12	P25398	40S ribosomal protein S12 OS=Homo sapiens GN=RPS12 PE=1 SV=3	1	4	3	3	6.8737	2.85065	20.9881	13.3289	4.37187e-07	1.39999e-06	7.09666	0.989527	1	1	WT - Control	limma	4.37187e-07	1.39999e-06	TRUE	hit	6.8737
741	CYFIP2	E7EVJ5|Q96F07-2	Cytoplasmic FMR1-interacting protein 2 OS=Homo sapiens GN=CYFIP2 PE=1 SV=1|Isoform 2 of Cytoplasmic FMR1-interacting protein 2 OS=Homo sapiens GN=CYFIP2	1	4	3	4	6.14414	3.35025	21.1258	13.3231	4.3876e-07	1.40218e-06	7.09294	0.989532	1	1	WT - Control	limma	4.3876e-07	1.40218e-06	TRUE	hit	6.14414
742	SLC25A1	P53007	Tricarboxylate transport protein, mitochondrial OS=Homo sapiens GN=SLC25A1 PE=1 SV=2	1	4	3	4	6.90858	3.79521	22.0553	13.3196	4.39729e-07	1.40218e-06	7.09066	0.989534	1	1	WT - Control	limma	4.39729e-07	1.40218e-06	TRUE	hit	6.90858
743	GNPAT	O15228|O15228-2	Dihydroxyacetone phosphate acyltransferase OS=Homo sapiens GN=GNPAT PE=1 SV=1|Isoform 2 of Dihydroxyacetone phosphate acyltransferase OS=Homo sapiens GN=GNPAT	1	4	3	7	6.39776	3.4325	22.3253	13.3071	4.43187e-07	1.40923e-06	7.08256	0.989544	1	1	WT - Control	limma	4.43187e-07	1.40923e-06	TRUE	hit	6.39776
744	TIMM44	O43615	Mitochondrial import inner membrane translocase subunit TIM44 OS=Homo sapiens GN=TIMM44 PE=1 SV=2	1	4	3	6	6.35044	3.8293	21.095	13.2969	4.46034e-07	1.4163e-06	7.07594	0.989552	1	1	WT - Control	limma	4.46034e-07	1.4163e-06	TRUE	hit	6.35044
745	ANKRD17	H0YM23|O75179|O75179-2|O75179-6|O75179-7	Ankyrin repeat domain-containing protein 17 (Fragment) OS=Homo sapiens GN=ANKRD17 PE=1 SV=1|Ankyrin repeat domain-containing protein 17 OS=Homo sapiens GN=ANKRD17 PE=1 SV=3|Isoform 2 of Ankyrin repeat domain-containing protein 17 OS=Homo sapiens GN=ANKRD17|Isoform 6 of Ankyrin repeat domain-containing protein 17 OS=Homo sapiens GN=ANKRD17|Isoform 7 of Ankyrin repeat domain-containing protein 17 O…	1	4	3	3	5.78436	2.61531	20.398	13.2913	4.47592e-07	1.41766e-06	7.07233	0.989557	1	1	WT - Control	limma	4.47592e-07	1.41766e-06	TRUE	hit	5.78436
746	EEF1G	P26641|P26641-2	Elongation factor 1-gamma OS=Homo sapiens GN=EEF1G PE=1 SV=3|Isoform 2 of Elongation factor 1-gamma OS=Homo sapiens GN=EEF1G	1	4	3	9	7.43921	2.57534	24.2317	13.2909	4.47714e-07	1.41766e-06	7.07205	0.989557	1	1	WT - Control	limma	4.47714e-07	1.41766e-06	TRUE	hit	7.43921
747	ARHGEF2	Q92974|Q92974-2|Q92974-3|V9GYM8	Rho guanine nucleotide exchange factor 2 OS=Homo sapiens GN=ARHGEF2 PE=1 SV=4|Isoform 2 of Rho guanine nucleotide exchange factor 2 OS=Homo sapiens GN=ARHGEF2|Isoform 3 of Rho guanine nucleotide exchange factor 2 OS=Homo sapiens GN=ARHGEF2|Rho guanine nucleotide exchange factor 2 OS=Homo sapiens GN=ARHGEF2 PE=1 SV=1	1	4	3	11	6.39654	3.10771	22.2274	13.2806	4.50602e-07	1.42481e-06	7.0654	0.989565	1	1	WT - Control	limma	4.50602e-07	1.42481e-06	TRUE	hit	6.39654
748	MAP3K4	F5H538|J3KNB8|Q9Y6R4|Q9Y6R4-2	Mitogen-activated protein kinase kinase kinase 4 OS=Homo sapiens GN=MAP3K4 PE=1 SV=1|Mitogen-activated protein kinase kinase kinase 4 OS=Homo sapiens GN=MAP3K4 PE=1 SV=1|Mitogen-activated protein kinase kinase kinase 4 OS=Homo sapiens GN=MAP3K4 PE=1 SV=2|Isoform 2 of Mitogen-activated protein kinase kinase kinase 4 OS=Homo sapiens GN=MAP3K4	1	4	3	2	5.70239	2.92454	19.9903	13.2657	1.41284e-06	3.38202e-06	6.07017	0.989577	1	1	WT - Control	limma	1.41284e-06	3.38202e-06	TRUE	hit	5.70239
749	SEC23IP	Q9Y6Y8	SEC23-interacting protein OS=Homo sapiens GN=SEC23IP PE=1 SV=1	1	4	3	6	5.87371	2.61618	21.6164	13.2653	4.54953e-07	1.43444e-06	7.05546	0.989577	1	1	WT - Control	limma	4.54953e-07	1.43444e-06	TRUE	hit	5.87371
750	NHLRC2	Q8NBF2	NHL repeat-containing protein 2 OS=Homo sapiens GN=NHLRC2 PE=1 SV=1	1	4	3	3	6.08519	2.85265	21.1074	13.2644	4.55207e-07	1.43444e-06	7.05488	0.989578	1	1	WT - Control	limma	4.55207e-07	1.43444e-06	TRUE	hit	6.08519
751	PSMC5	P62195|P62195-2	26S protease regulatory subunit 8 OS=Homo sapiens GN=PSMC5 PE=1 SV=1|Isoform 2 of 26S protease regulatory subunit 8 OS=Homo sapiens GN=PSMC5	1	4	3	10	6.93944	2.86757	23.8123	13.2632	4.5555e-07	1.43444e-06	7.0541	0.989579	1	1	WT - Control	limma	4.5555e-07	1.43444e-06	TRUE	hit	6.93944
752	SLC35A2	P78381|P78381-2	UDP-galactose translocator OS=Homo sapiens GN=SLC35A2 PE=1 SV=1|Isoform 2 of UDP-galactose translocator OS=Homo sapiens GN=SLC35A2	1	4	3	2	5.83466	3.21077	20.4916	13.2548	1.42144e-06	3.39824e-06	6.064	0.989585	1	1	WT - Control	limma	1.42144e-06	3.39824e-06	TRUE	hit	5.83466
753	GTSE1	Q9NYZ3	G2 and S phase-expressed protein 1 OS=Homo sapiens GN=GTSE1 PE=1 SV=3	1	4	3	6	6.05886	3.11851	21.1003	13.2331	4.64258e-07	1.45838e-06	7.0345	0.989602	1	1	WT - Control	limma	4.64258e-07	1.45838e-06	TRUE	hit	6.05886
754	TOR1B	O14657	Torsin-1B OS=Homo sapiens GN=TOR1B PE=1 SV=2	1	4	3	3	6.15332	2.80843	21.5455	13.2324	4.6444e-07	1.45838e-06	7.0341	0.989603	1	1	WT - Control	limma	4.6444e-07	1.45838e-06	TRUE	hit	6.15332
755	YBEY	P58557|P58557-2	Putative ribonuclease OS=Homo sapiens GN=YBEY PE=1 SV=2|Isoform B of Putative ribonuclease OS=Homo sapiens GN=YBEY	1	4	3	3	6.40343	2.82923	20.8866	13.2294	4.65318e-07	1.45911e-06	7.03214	0.989605	1	1	WT - Control	limma	4.65318e-07	1.45911e-06	TRUE	hit	6.40343
756	FKBP8	Q14318|Q14318-2	Peptidyl-prolyl cis-trans isomerase FKBP8 OS=Homo sapiens GN=FKBP8 PE=1 SV=2|Isoform 2 of Peptidyl-prolyl cis-trans isomerase FKBP8 OS=Homo sapiens GN=FKBP8	1	4	3	6	6.87603	4.20046	22.5243	13.209	4.71337e-07	1.47077e-06	7.01884	0.989621	1	1	WT - Control	limma	4.71337e-07	1.47077e-06	TRUE	hit	6.87603
757	XPNPEP3	Q9NQH7|Q9NQH7-2|Q9NQH7-4	Probable Xaa-Pro aminopeptidase 3 OS=Homo sapiens GN=XPNPEP3 PE=1 SV=1|Isoform 2 of Probable Xaa-Pro aminopeptidase 3 OS=Homo sapiens GN=XPNPEP3|Isoform 4 of Probable Xaa-Pro aminopeptidase 3 OS=Homo sapiens GN=XPNPEP3	1	4	3	2	5.89089	2.93833	20.3014	13.208	4.71633e-07	1.47077e-06	7.01819	0.989622	1	1	WT - Control	limma	4.71633e-07	1.47077e-06	TRUE	hit	5.89089
758	CDC2|CDK1	A0A024QZP7|P06493	Cell division cycle 2, G1 to S and G2 to M, isoform CRA_a OS=Homo sapiens GN=CDC2 PE=1 SV=1|Cyclin-dependent kinase 1 OS=Homo sapiens GN=CDK1 PE=1 SV=3	1	4	3	3	6.41575	2.47112	21.9551	13.1906	4.76854e-07	1.485e-06	7.00679	0.989636	1	1	WT - Control	limma	4.76854e-07	1.485e-06	TRUE	hit	6.41575
759	PAPD5	H3BQM0|Q8NDF8|Q8NDF8-5	Non-canonical poly(A) RNA polymerase PAPD5 OS=Homo sapiens GN=PAPD5 PE=1 SV=1|Non-canonical poly(A) RNA polymerase PAPD5 OS=Homo sapiens GN=PAPD5 PE=1 SV=2|Isoform 5 of Non-canonical poly(A) RNA polymerase PAPD5 OS=Homo sapiens GN=PAPD5	1	4	3	5	5.95894	2.61248	20.9722	13.1847	4.78631e-07	1.4877e-06	7.00294	0.98964	1	1	WT - Control	limma	4.78631e-07	1.4877e-06	TRUE	hit	5.95894
760	GTPBP2	H0Y7A5|Q9BX10	GTP-binding protein 2 (Fragment) OS=Homo sapiens GN=GTPBP2 PE=1 SV=7|GTP-binding protein 2 OS=Homo sapiens GN=GTPBP2 PE=1 SV=1	1	4	3	3	6.10361	3.89286	21.1778	13.1833	4.79035e-07	1.4877e-06	7.00207	0.989641	1	1	WT - Control	limma	4.79035e-07	1.4877e-06	TRUE	hit	6.10361
761	HADHA	P40939	Trifunctional enzyme subunit alpha, mitochondrial OS=Homo sapiens GN=HADHA PE=1 SV=2	1	4	3	7	6.94205	3.24693	22.8098	13.1796	4.8015e-07	1.48911e-06	6.99966	0.989644	1	1	WT - Control	limma	4.8015e-07	1.48911e-06	TRUE	hit	6.94205
762	CDC42BPB	Q9Y5S2	Serine/threonine-protein kinase MRCK beta OS=Homo sapiens GN=CDC42BPB PE=1 SV=2	1	4	3	7	6.03608	3.40674	21.3523	13.1743	4.81787e-07	1.48911e-06	6.99614	0.989649	1	1	WT - Control	limma	4.81787e-07	1.48911e-06	TRUE	hit	6.03608
763	NEMF	G3V5V3|O60524|O60524-3|O60524-4	Nuclear export mediator factor NEMF (Fragment) OS=Homo sapiens GN=NEMF PE=1 SV=7|Nuclear export mediator factor NEMF OS=Homo sapiens GN=NEMF PE=1 SV=4|Isoform 3 of Nuclear export mediator factor NEMF OS=Homo sapiens GN=NEMF|Isoform 4 of Nuclear export mediator factor NEMF OS=Homo sapiens GN=NEMF	1	4	3	5	6.46092	2.76807	22.4258	13.1739	4.81896e-07	1.48911e-06	6.9959	0.989649	1	1	WT - Control	limma	4.81896e-07	1.48911e-06	TRUE	hit	6.46092
764	MAP2K3	P46734	Dual specificity mitogen-activated protein kinase kinase 3 OS=Homo sapiens GN=MAP2K3 PE=1 SV=2	1	4	3	5	6.56588	4.17905	23.1005	13.1705	4.82947e-07	1.48963e-06	6.99365	0.989652	1	1	WT - Control	limma	4.82947e-07	1.48963e-06	TRUE	hit	6.56588
765	ERAP1	Q9NZ08|Q9NZ08-2	Endoplasmic reticulum aminopeptidase 1 OS=Homo sapiens GN=ERAP1 PE=1 SV=3|Isoform 2 of Endoplasmic reticulum aminopeptidase 1 OS=Homo sapiens GN=ERAP1	1	4	3	3	5.87725	3.25106	21.5492	13.1548	1.50339e-06	3.56406e-06	6.02001	0.989664	1	1	WT - Control	limma	1.50339e-06	3.56406e-06	TRUE	hit	5.87725
766	EXOC4	Q96A65	Exocyst complex component 4 OS=Homo sapiens GN=EXOC4 PE=1 SV=1	1	4	3	9	6.48268	3.11948	22.5978	13.1491	4.89524e-07	1.50786e-06	6.97964	0.989668	1	1	WT - Control	limma	4.89524e-07	1.50786e-06	TRUE	hit	6.48268
767	PSMC4	P43686	26S protease regulatory subunit 6B OS=Homo sapiens GN=PSMC4 PE=1 SV=2	1	4	3	11	6.81547	2.67318	23.4241	13.1469	4.90189e-07	1.50786e-06	6.97823	0.98967	1	1	WT - Control	limma	4.90189e-07	1.50786e-06	TRUE	hit	6.81547
768	PPM1E	Q8WY54|Q8WY54-2|Q8WY54-3	Protein phosphatase 1E OS=Homo sapiens GN=PPM1E PE=1 SV=2|Isoform 2 of Protein phosphatase 1E OS=Homo sapiens GN=PPM1E|Isoform 3 of Protein phosphatase 1E OS=Homo sapiens GN=PPM1E	1	4	3	4	6.256	3.68919	21.4815	13.1419	4.91731e-07	1.51056e-06	6.97498	0.989674	1	1	WT - Control	limma	4.91731e-07	1.51056e-06	TRUE	hit	6.256
769	ABHD12	Q8N2K0|Q8N2K0-2	Monoacylglycerol lipase ABHD12 OS=Homo sapiens GN=ABHD12 PE=1 SV=2|Isoform 2 of Monoacylglycerol lipase ABHD12 OS=Homo sapiens GN=ABHD12	1	4	3	2	6.49096	3.3936	21.1412	13.1345	1.52073e-06	3.59387e-06	5.99527	0.98968	1	1	WT - Control	limma	1.52073e-06	3.59387e-06	TRUE	hit	6.49096
770	MGAT5	Q09328	Alpha-1,6-mannosylglycoprotein 6-beta-N-acetylglucosaminyltransferase A OS=Homo sapiens GN=MGAT5 PE=2 SV=1	1	4	3	2	5.70184	2.3733	19.8263	13.1327	4.94624e-07	1.51738e-06	6.9689	0.989681	1	1	WT - Control	limma	4.94624e-07	1.51738e-06	TRUE	hit	5.70184
771	DIP2A	Q14689|Q14689-6	Disco-interacting protein 2 homolog A OS=Homo sapiens GN=DIP2A PE=1 SV=2|Isoform 6 of Disco-interacting protein 2 homolog A OS=Homo sapiens GN=DIP2A	1	4	3	4	6.04718	3.81095	21.2441	13.1246	4.97151e-07	1.52307e-06	6.96362	0.989688	1	1	WT - Control	limma	4.97151e-07	1.52307e-06	TRUE	hit	6.04718
772	TCP11L1	E9PJ55|Q9NUJ3	T-complex protein 11-like protein 1 OS=Homo sapiens GN=TCP11L1 PE=1 SV=1|T-complex protein 11-like protein 1 OS=Homo sapiens GN=TCP11L1 PE=1 SV=1	1	4	3	4	6.338	3.38476	21.6206	13.1199	1.53331e-06	3.61605e-06	5.98688	0.989691	1	1	WT - Control	limma	1.53331e-06	3.61605e-06	TRUE	hit	6.338
773	NAAA	Q02083|Q02083-2	N-acylethanolamine-hydrolyzing acid amidase OS=Homo sapiens GN=NAAA PE=1 SV=3|Isoform 2 of N-acylethanolamine-hydrolyzing acid amidase OS=Homo sapiens GN=NAAA	1	4	3	3	5.88506	2.87051	20.5442	13.1133	5.00745e-07	1.53201e-06	6.95616	0.989696	1	1	WT - Control	limma	5.00745e-07	1.53201e-06	TRUE	hit	5.88506
774	GPATCH8	Q9UKJ3	G patch domain-containing protein 8 OS=Homo sapiens GN=GPATCH8 PE=1 SV=2	1	4	3	3	6.15001	2.82894	21.9509	13.1088	5.02165e-07	1.53428e-06	6.95322	0.9897	1	1	WT - Control	limma	5.02165e-07	1.53428e-06	TRUE	hit	6.15001
775	ARL1	F8VYN9|P40616|P40616-2	ADP-ribosylation factor-like protein 1 OS=Homo sapiens GN=ARL1 PE=1 SV=1|ADP-ribosylation factor-like protein 1 OS=Homo sapiens GN=ARL1 PE=1 SV=1|Isoform 2 of ADP-ribosylation factor-like protein 1 OS=Homo sapiens GN=ARL1	1	4	3	2	7.18698	3.10736	20.0526	13.102	1.54883e-06	3.64885e-06	5.97662	0.989705	1	1	WT - Control	limma	1.54883e-06	3.64885e-06	TRUE	hit	7.18698
776	TMEM57	Q8N5G2	Macoilin OS=Homo sapiens GN=TMEM57 PE=1 SV=1	1	4	3	3	5.74154	2.7904	20.2894	13.1018	5.04392e-07	1.53901e-06	6.94864	0.989705	1	1	WT - Control	limma	5.04392e-07	1.53901e-06	TRUE	hit	5.74154
777	RUVBL1	Q9Y265	RuvB-like 1 OS=Homo sapiens GN=RUVBL1 PE=1 SV=1	1	4	3	9	6.87572	2.30448	23.5284	13.0979	5.05641e-07	1.54074e-06	6.94608	0.989708	1	1	WT - Control	limma	5.05641e-07	1.54074e-06	TRUE	hit	6.87572
778	GUSB	P08236|P08236-2	Beta-glucuronidase OS=Homo sapiens GN=GUSB PE=1 SV=2|Isoform 2 of Beta-glucuronidase OS=Homo sapiens GN=GUSB	1	4	3	4	6.11709	4.07533	21.4779	13.0916	5.07692e-07	1.54308e-06	6.94188	0.989714	1	1	WT - Control	limma	5.07692e-07	1.54308e-06	TRUE	hit	6.11709
779	POLR2A	A0A0C4DGZ0|P24928	DNA-directed RNA polymerase subunit OS=Homo sapiens GN=POLR2A PE=1 SV=1|DNA-directed RNA polymerase II subunit RPB1 OS=Homo sapiens GN=POLR2A PE=1 SV=2	1	4	3	13	6.08845	2.20896	23.1041	13.0905	5.08034e-07	1.54308e-06	6.94118	0.989714	1	1	WT - Control	limma	5.08034e-07	1.54308e-06	TRUE	hit	6.08845
780	ATP5J2|PTCD1	G3V325|O75127	Protein ATP5J2-PTCD1 OS=Homo sapiens GN=ATP5J2-PTCD1 PE=4 SV=1|Pentatricopeptide repeat-containing protein 1, mitochondrial OS=Homo sapiens GN=PTCD1 PE=1 SV=2	1	4	3	4	5.99408	2.91782	21.2975	13.0892	5.08453e-07	1.54308e-06	6.94033	0.989715	1	1	WT - Control	limma	5.08453e-07	1.54308e-06	TRUE	hit	5.99408
781	PNO1	Q9NRX1	RNA-binding protein PNO1 OS=Homo sapiens GN=PNO1 PE=1 SV=1	1	4	3	4	6.83279	4.14605	23.0246	13.0864	5.0936e-07	1.54376e-06	6.93848	0.989718	1	1	WT - Control	limma	5.0936e-07	1.54376e-06	TRUE	hit	6.83279
782	SLC30A9	Q6PML9	Zinc transporter 9 OS=Homo sapiens GN=SLC30A9 PE=1 SV=1	1	4	3	3	5.9614	2.84142	20.6666	13.0529	5.20317e-07	1.57486e-06	6.91642	0.989744	1	1	WT - Control	limma	5.20317e-07	1.57486e-06	TRUE	hit	5.9614
783	PTPN9	A0A0A0MR09|P43378	Tyrosine-protein phosphatase non-receptor type 9 OS=Homo sapiens GN=PTPN9 PE=1 SV=1|Tyrosine-protein phosphatase non-receptor type 9 OS=Homo sapiens GN=PTPN9 PE=1 SV=1	1	4	3	4	5.89089	2.54643	20.8778	13.0379	5.25337e-07	1.58793e-06	6.90647	0.989756	1	1	WT - Control	limma	5.25337e-07	1.58793e-06	TRUE	hit	5.89089
784	NEU1	Q99519	Sialidase-1 OS=Homo sapiens GN=NEU1 PE=1 SV=1	1	4	3	2	6.38365	3.63383	20.6293	13.0292	5.28258e-07	1.59463e-06	6.90072	0.989763	1	1	WT - Control	limma	5.28258e-07	1.59463e-06	TRUE	hit	6.38365
785	NCOR1	O75376|O75376-2	Nuclear receptor corepressor 1 OS=Homo sapiens GN=NCOR1 PE=1 SV=2|Isoform 2 of Nuclear receptor corepressor 1 OS=Homo sapiens GN=NCOR1	1	4	3	6	6.1349	2.5027	21.8009	13.0196	5.31493e-07	1.60226e-06	6.89439	0.98977	1	1	WT - Control	limma	5.31493e-07	1.60226e-06	TRUE	hit	6.1349
786	FASTKD2	Q9NYY8|Q9NYY8-2	FAST kinase domain-containing protein 2, mitochondrial OS=Homo sapiens GN=FASTKD2 PE=1 SV=1|Isoform 2 of FAST kinase domain-containing protein 2, mitochondrial OS=Homo sapiens GN=FASTKD2	1	4	3	5	5.95162	3.32371	21.13	13.0019	5.37528e-07	1.6183e-06	6.88268	0.989784	1	1	WT - Control	limma	5.37528e-07	1.6183e-06	TRUE	hit	5.95162
787	FECH	P22830|P22830-2	Ferrochelatase, mitochondrial OS=Homo sapiens GN=FECH PE=1 SV=2|Isoform 2 of Ferrochelatase, mitochondrial OS=Homo sapiens GN=FECH	1	4	3	4	6.3436	3.18223	20.9434	12.9987	5.38643e-07	1.6195e-06	6.88053	0.989786	1	1	WT - Control	limma	5.38643e-07	1.6195e-06	TRUE	hit	6.3436
788	PSMC1	P62191	26S protease regulatory subunit 4 OS=Homo sapiens GN=PSMC1 PE=1 SV=1	1	4	3	9	6.77868	2.47745	23.4687	12.9951	5.39882e-07	1.61966e-06	6.87815	0.989789	1	1	WT - Control	limma	5.39882e-07	1.61966e-06	TRUE	hit	6.77868
789	LONRF2	Q1L5Z9	LON peptidase N-terminal domain and RING finger protein 2 OS=Homo sapiens GN=LONRF2 PE=2 SV=3	1	4	3	2	5.87086	2.17429	20.1986	12.9944	5.40126e-07	1.61966e-06	6.87768	0.98979	1	1	WT - Control	limma	5.40126e-07	1.61966e-06	TRUE	hit	5.87086
790	DEPDC1B	Q8WUY9|Q8WUY9-2	DEP domain-containing protein 1B OS=Homo sapiens GN=DEPDC1B PE=1 SV=2|Isoform 2 of DEP domain-containing protein 1B OS=Homo sapiens GN=DEPDC1B	1	4	3	2	5.88819	2.87754	20.1657	12.9878	5.42408e-07	1.62435e-06	6.87331	0.989795	1	1	WT - Control	limma	5.42408e-07	1.62435e-06	TRUE	hit	5.88819
791	LARP4B	Q92615	La-related protein 4B OS=Homo sapiens GN=LARP4B PE=1 SV=3	1	4	3	6	6.24169	3.62612	21.5744	12.9851	5.43341e-07	1.625e-06	6.87152	0.989797	1	1	WT - Control	limma	5.43341e-07	1.625e-06	TRUE	hit	6.24169
792	LPCAT1	Q8NF37	Lysophosphatidylcholine acyltransferase 1 OS=Homo sapiens GN=LPCAT1 PE=1 SV=2	1	4	3	3	6.306	3.11118	20.1863	12.9687	5.49068e-07	1.63996e-06	6.86065	0.98981	1	1	WT - Control	limma	5.49068e-07	1.63996e-06	TRUE	hit	6.306
793	SIAE	Q9HAT2|Q9HAT2-2	Sialate O-acetylesterase OS=Homo sapiens GN=SIAE PE=1 SV=1|Isoform 2 of Sialate O-acetylesterase OS=Homo sapiens GN=SIAE	1	4	3	2	6.0921	3.06632	20.0291	12.9618	5.51521e-07	1.64143e-06	6.85602	0.989815	1	1	WT - Control	limma	5.51521e-07	1.64143e-06	TRUE	hit	6.0921
794	EHD4	A0A087WUA5|Q9H223	EH domain-containing protein 4 OS=Homo sapiens GN=EHD4 PE=1 SV=1|EH domain-containing protein 4 OS=Homo sapiens GN=EHD4 PE=1 SV=1	1	4	3	4	6.35515	2.5567	21.3892	12.9617	5.5157e-07	1.64143e-06	6.85593	0.989816	1	1	WT - Control	limma	5.5157e-07	1.64143e-06	TRUE	hit	6.35515
795	ACSL1	E7EPM6|P33121|P33121-2|P33121-3	Long-chain-fatty-acid--CoA ligase 1 OS=Homo sapiens GN=ACSL1 PE=1 SV=1|Long-chain-fatty-acid--CoA ligase 1 OS=Homo sapiens GN=ACSL1 PE=1 SV=1|Isoform 2 of Long-chain-fatty-acid--CoA ligase 1 OS=Homo sapiens GN=ACSL1|Isoform 3 of Long-chain-fatty-acid--CoA ligase 1 OS=Homo sapiens GN=ACSL1	1	4	3	8	6.42464	3.60309	22.9716	12.9612	5.51736e-07	1.64143e-06	6.85562	0.989816	1	1	WT - Control	limma	5.51736e-07	1.64143e-06	TRUE	hit	6.42464
796	RPP30	P78346|P78346-2	Ribonuclease P protein subunit p30 OS=Homo sapiens GN=RPP30 PE=1 SV=1|Isoform 2 of Ribonuclease P protein subunit p30 OS=Homo sapiens GN=RPP30	1	4	3	3	6.84747	2.86611	21.4107	12.9569	5.53241e-07	1.64375e-06	6.85279	0.989819	1	1	WT - Control	limma	5.53241e-07	1.64375e-06	TRUE	hit	6.84747
797	MFN2	O95140	Mitofusin-2 OS=Homo sapiens GN=MFN2 PE=1 SV=3	1	4	3	3	5.8654	3.19141	20.9406	12.9249	5.64718e-07	1.67565e-06	6.83149	0.989844	1	1	WT - Control	limma	5.64718e-07	1.67565e-06	TRUE	hit	5.8654
798	TBRG4	Q969Z0	Protein TBRG4 OS=Homo sapiens GN=TBRG4 PE=1 SV=1	1	4	3	4	5.9724	2.73237	21.0891	12.9013	5.73364e-07	1.69908e-06	6.81571	0.989863	1	1	WT - Control	limma	5.73364e-07	1.69908e-06	TRUE	hit	5.9724
799	CUL7	Q14999	Cullin-7 OS=Homo sapiens GN=CUL7 PE=1 SV=2	1	4	3	4	5.84372	2.48246	21.1054	12.8972	5.74899e-07	1.70024e-06	6.81294	0.989866	1	1	WT - Control	limma	5.74899e-07	1.70024e-06	TRUE	hit	5.84372
800	ERAL1	O75616	GTPase Era, mitochondrial OS=Homo sapiens GN=ERAL1 PE=1 SV=2	1	4	3	7	6.42577	3.04044	22.3156	12.8924	5.76681e-07	1.70024e-06	6.80973	0.98987	1	1	WT - Control	limma	5.76681e-07	1.70024e-06	TRUE	hit	6.42577
801	ADAM9	Q13443	Disintegrin and metalloproteinase domain-containing protein 9 OS=Homo sapiens GN=ADAM9 PE=1 SV=1	1	4	3	4	5.88202	3.00606	21.0021	12.8911	5.7714e-07	1.70024e-06	6.8089	0.989871	1	1	WT - Control	limma	5.7714e-07	1.70024e-06	TRUE	hit	5.88202
802	AP3B1	O00203|O00203-3	AP-3 complex subunit beta-1 OS=Homo sapiens GN=AP3B1 PE=1 SV=3|Isoform 2 of AP-3 complex subunit beta-1 OS=Homo sapiens GN=AP3B1	1	4	3	5	6.26338	2.47079	21.9228	12.8901	5.7751e-07	1.70024e-06	6.80824	0.989872	1	1	WT - Control	limma	5.7751e-07	1.70024e-06	TRUE	hit	6.26338
803	ATAD1	Q8NBU5	ATPase family AAA domain-containing protein 1 OS=Homo sapiens GN=ATAD1 PE=1 SV=1	1	4	3	2	5.73861	3.40043	20.4837	12.884	5.79783e-07	1.70255e-06	6.80416	0.989877	1	1	WT - Control	limma	5.79783e-07	1.70255e-06	TRUE	hit	5.73861
804	NKIRAS1	G5E9P3|Q9NYS0	NF-kappa-B inhibitor-interacting Ras-like protein 1 OS=Homo sapiens GN=NKIRAS1 PE=1 SV=1|NF-kappa-B inhibitor-interacting Ras-like protein 1 OS=Homo sapiens GN=NKIRAS1 PE=1 SV=1	1	4	3	2	6.02775	3.72062	21.1092	12.8729	5.8396e-07	1.71255e-06	6.7967	0.989885	1	1	WT - Control	limma	5.8396e-07	1.71255e-06	TRUE	hit	6.02775
805	PM20D2	Q8IYS1	Peptidase M20 domain-containing protein 2 OS=Homo sapiens GN=PM20D2 PE=1 SV=2	1	4	3	2	5.8741	2.60278	20.3736	12.8695	5.85253e-07	1.71412e-06	6.79441	0.989888	1	1	WT - Control	limma	5.85253e-07	1.71412e-06	TRUE	hit	5.8741
806	GEMIN5	Q8TEQ6	Gem-associated protein 5 OS=Homo sapiens GN=GEMIN5 PE=1 SV=3	1	4	3	6	6.10172	2.27035	20.9815	12.8647	5.8706e-07	1.71719e-06	6.79121	0.989892	1	1	WT - Control	limma	5.8706e-07	1.71719e-06	TRUE	hit	6.10172
807	PDIA6	Q15084|Q15084-2|Q15084-3|Q15084-4|Q15084-5	Protein disulfide-isomerase A6 OS=Homo sapiens GN=PDIA6 PE=1 SV=1|Isoform 2 of Protein disulfide-isomerase A6 OS=Homo sapiens GN=PDIA6|Isoform 3 of Protein disulfide-isomerase A6 OS=Homo sapiens GN=PDIA6|Isoform 4 of Protein disulfide-isomerase A6 OS=Homo sapiens GN=PDIA6|Isoform 5 of Protein disulfide-isomerase A6 OS=Homo sapiens GN=PDIA6	1	4	3	8	6.82672	3.29358	22.7437	12.8621	5.88033e-07	1.71782e-06	6.78949	0.989894	1	1	WT - Control	limma	5.88033e-07	1.71782e-06	TRUE	hit	6.82672
808	CISD3	P0C7P0	CDGSH iron-sulfur domain-containing protein 3, mitochondrial OS=Homo sapiens GN=CISD3 PE=1 SV=1	1	4	3	2	6.20846	2.73094	19.9287	12.8551	5.90697e-07	1.72337e-06	6.78479	0.989899	1	1	WT - Control	limma	5.90697e-07	1.72337e-06	TRUE	hit	6.20846
809	TMEM59	Q5T6Z8|Q9BXS4	Transmembrane protein 59 OS=Homo sapiens GN=TMEM59 PE=1 SV=1|Transmembrane protein 59 OS=Homo sapiens GN=TMEM59 PE=1 SV=1	1	4	3	2	6.0579	2.18587	19.9688	12.8383	5.9715e-07	1.73996e-06	6.77351	0.989912	1	1	WT - Control	limma	5.9715e-07	1.73996e-06	TRUE	hit	6.0579
810	RPS14	P62263	40S ribosomal protein S14 OS=Homo sapiens GN=RPS14 PE=1 SV=3	1	4	3	4	7.3914	3.64682	21.8409	12.8334	5.99072e-07	1.74137e-06	6.77017	0.989916	1	1	WT - Control	limma	5.99072e-07	1.74137e-06	TRUE	hit	7.3914
811	TTC21B	Q7Z4L5	Tetratricopeptide repeat protein 21B OS=Homo sapiens GN=TTC21B PE=1 SV=2	1	4	3	2	6.02249	2.3022	19.9821	12.8331	5.99172e-07	1.74137e-06	6.77	0.989917	1	1	WT - Control	limma	5.99172e-07	1.74137e-06	TRUE	hit	6.02249
812	CPVL	Q9H3G5	Probable serine carboxypeptidase CPVL OS=Homo sapiens GN=CPVL PE=1 SV=2	1	4	3	5	6.83879	3.54969	21.3716	12.8239	6.0275e-07	1.74873e-06	6.76381	0.989924	1	1	WT - Control	limma	6.0275e-07	1.74873e-06	TRUE	hit	6.83879
813	PCCA	P05165|P05165-2	Propionyl-CoA carboxylase alpha chain, mitochondrial OS=Homo sapiens GN=PCCA PE=1 SV=4|Isoform 2 of Propionyl-CoA carboxylase alpha chain, mitochondrial OS=Homo sapiens GN=PCCA	1	4	3	3	5.86107	2.19927	20.9295	12.8226	6.03251e-07	1.74873e-06	6.76295	0.989925	1	1	WT - Control	limma	6.03251e-07	1.74873e-06	TRUE	hit	5.86107
814	ANAPC7	Q9UJX3|Q9UJX3-2	Anaphase-promoting complex subunit 7 OS=Homo sapiens GN=ANAPC7 PE=1 SV=4|Isoform 2 of Anaphase-promoting complex subunit 7 OS=Homo sapiens GN=ANAPC7	1	4	3	4	6.10804	3.73048	21.1816	12.817	6.05451e-07	1.75287e-06	6.75917	0.989929	1	1	WT - Control	limma	6.05451e-07	1.75287e-06	TRUE	hit	6.10804
815	SPATA5L1	Q9BVQ7|Q9BVQ7-2	Spermatogenesis-associated protein 5-like protein 1 OS=Homo sapiens GN=SPATA5L1 PE=1 SV=2|Isoform 2 of Spermatogenesis-associated protein 5-like protein 1 OS=Homo sapiens GN=SPATA5L1	1	4	3	2	6.14644	2.82311	20.3708	12.8012	6.11667e-07	1.7686e-06	6.74856	0.989942	1	1	WT - Control	limma	6.11667e-07	1.7686e-06	TRUE	hit	6.14644
816	XPO7	E7ESC6|Q9UIA9	Exportin-7 OS=Homo sapiens GN=XPO7 PE=1 SV=1|Exportin-7 OS=Homo sapiens GN=XPO7 PE=1 SV=3	1	4	3	6	6.19336	3.20139	21.6093	12.7971	6.13298e-07	1.77105e-06	6.74579	0.989945	1	1	WT - Control	limma	6.13298e-07	1.77105e-06	TRUE	hit	6.19336
817	ABCA3	H0Y3H2|Q99758	ATP-binding cassette sub-family A member 3 OS=Homo sapiens GN=ABCA3 PE=1 SV=1|ATP-binding cassette sub-family A member 3 OS=Homo sapiens GN=ABCA3 PE=1 SV=2	1	4	3	4	5.74006	2.73645	20.6671	12.7893	6.16431e-07	1.77783e-06	6.7405	0.989951	1	1	WT - Control	limma	6.16431e-07	1.77783e-06	TRUE	hit	5.74006
818	ACADSB	P45954	Short/branched chain specific acyl-CoA dehydrogenase, mitochondrial OS=Homo sapiens GN=ACADSB PE=1 SV=1	1	4	3	2	6.20497	2.99597	20.5869	12.7769	6.21409e-07	1.78991e-06	6.73214	0.989961	1	1	WT - Control	limma	6.21409e-07	1.78991e-06	TRUE	hit	6.20497
819	CLPX	O76031	ATP-dependent Clp protease ATP-binding subunit clpX-like, mitochondrial OS=Homo sapiens GN=CLPX PE=1 SV=2	1	4	3	5	6.14407	2.26919	21.2723	12.7527	6.31236e-07	1.81405e-06	6.71583	0.98998	1	1	WT - Control	limma	6.31236e-07	1.81405e-06	TRUE	hit	6.14407
820	USP11	G5E9A6	Ubiquitin carboxyl-terminal hydrolase 11 OS=Homo sapiens GN=USP11 PE=1 SV=1	1	4	3	4	6.07848	2.28467	21.3865	12.7523	6.31392e-07	1.81405e-06	6.71558	0.98998	1	1	WT - Control	limma	6.31392e-07	1.81405e-06	TRUE	hit	6.07848
821	PASK	Q96RG2|Q96RG2-2	PAS domain-containing serine/threonine-protein kinase OS=Homo sapiens GN=PASK PE=1 SV=3|Isoform 2 of PAS domain-containing serine/threonine-protein kinase OS=Homo sapiens GN=PASK	1	4	3	2	5.96934	2.78958	19.8409	12.7512	1.89298e-06	4.29179e-06	5.77168	0.989981	1	1	WT - Control	limma	1.89298e-06	4.29179e-06	TRUE	hit	5.96934
822	ZKSCAN8	Q15776	Zinc finger protein with KRAB and SCAN domains 8 OS=Homo sapiens GN=ZKSCAN8 PE=1 SV=2	1	4	3	5	6.08567	2.84015	20.9702	12.748	6.33172e-07	1.81686e-06	6.71265	0.989983	1	1	WT - Control	limma	6.33172e-07	1.81686e-06	TRUE	hit	6.08567
823	UTP20	O75691	Small subunit processome component 20 homolog OS=Homo sapiens GN=UTP20 PE=1 SV=3	1	4	3	9	5.8504	3.35611	21.8885	12.7247	6.42883e-07	1.84239e-06	6.69683	0.990002	1	1	WT - Control	limma	6.42883e-07	1.84239e-06	TRUE	hit	5.8504
824	METTL3	B4DTN4|F5H6D8|Q86U44	N6-adenosine-methyltransferase 70 kDa subunit OS=Homo sapiens GN=METTL3 PE=1 SV=1|N6-adenosine-methyltransferase 70 kDa subunit OS=Homo sapiens GN=METTL3 PE=1 SV=1|N6-adenosine-methyltransferase 70 kDa subunit OS=Homo sapiens GN=METTL3 PE=1 SV=2	1	4	3	3	5.94364	2.6651	20.5729	12.7124	6.48037e-07	1.85039e-06	6.68853	0.990011	1	1	WT - Control	limma	6.48037e-07	1.85039e-06	TRUE	hit	5.94364
825	BTAF1	A0A0A0MTH9|O14981	TATA-binding protein-associated factor 172 OS=Homo sapiens GN=BTAF1 PE=1 SV=1|TATA-binding protein-associated factor 172 OS=Homo sapiens GN=BTAF1 PE=1 SV=2	1	4	3	4	5.81728	3.40787	20.9028	12.7122	6.48128e-07	1.85039e-06	6.68838	0.990012	1	1	WT - Control	limma	6.48128e-07	1.85039e-06	TRUE	hit	5.81728
826	UNC45A	Q9H3U1|Q9H3U1-2	Protein unc-45 homolog A OS=Homo sapiens GN=UNC45A PE=1 SV=1|Isoform 2 of Protein unc-45 homolog A OS=Homo sapiens GN=UNC45A	1	4	3	11	6.62752	2.86839	23.2781	12.7084	6.49729e-07	1.85263e-06	6.68582	0.990015	1	1	WT - Control	limma	6.49729e-07	1.85263e-06	TRUE	hit	6.62752
827	ZNF227	Q86WZ6	Zinc finger protein 227 OS=Homo sapiens GN=ZNF227 PE=1 SV=1	1	4	3	5	5.92625	2.78116	20.7186	12.703	1.9466e-06	4.4027e-06	5.74307	0.990019	1	1	WT - Control	limma	1.9466e-06	4.4027e-06	TRUE	hit	5.92625
828	PSMC6	A0A087X2I1|P62333	26S protease regulatory subunit 10B OS=Homo sapiens GN=PSMC6 PE=1 SV=1|26S protease regulatory subunit 10B OS=Homo sapiens GN=PSMC6 PE=1 SV=1	1	4	3	8	6.6145	2.24346	22.5406	12.6882	6.58378e-07	1.87257e-06	6.67206	0.99003	1	1	WT - Control	limma	6.58378e-07	1.87257e-06	TRUE	hit	6.6145
829	BRCA2	P51587	Breast cancer type 2 susceptibility protein OS=Homo sapiens GN=BRCA2 PE=1 SV=3	1	4	3	8	5.9438	2.32199	22.0897	12.6613	6.70039e-07	1.90096e-06	6.6538	0.990052	1	1	WT - Control	limma	6.70039e-07	1.90096e-06	TRUE	hit	5.9438
830	FUT8	Q9BYC5	Alpha-(1,6)-fucosyltransferase OS=Homo sapiens GN=FUT8 PE=1 SV=2	1	4	3	3	5.74472	2.53631	20.1116	12.6546	6.73009e-07	1.907e-06	6.6492	0.990057	1	1	WT - Control	limma	6.73009e-07	1.907e-06	TRUE	hit	5.74472
831	LMAN2	D6RBV2|D6RDX1|D6RIU4|Q12907	Vesicular integral-membrane protein VIP36 OS=Homo sapiens GN=LMAN2 PE=1 SV=1|Vesicular integral-membrane protein VIP36 (Fragment) OS=Homo sapiens GN=LMAN2 PE=1 SV=1|Vesicular integral-membrane protein VIP36 (Fragment) OS=Homo sapiens GN=LMAN2 PE=1 SV=7|Vesicular integral-membrane protein VIP36 OS=Homo sapiens GN=LMAN2 PE=1 SV=1	1	4	3	2	6.2518	3.19039	20.237	12.6495	6.7524e-07	1.91093e-06	6.64576	0.990061	1	1	WT - Control	limma	6.7524e-07	1.91093e-06	TRUE	hit	6.2518
832	YIF1B	Q5BJH7|Q5BJH7-3	Protein YIF1B OS=Homo sapiens GN=YIF1B PE=1 SV=1|Isoform 3 of Protein YIF1B OS=Homo sapiens GN=YIF1B	1	4	3	2	6.3639	2.4959	20.3873	12.6189	6.88952e-07	1.94278e-06	6.62484	0.990085	1	1	WT - Control	limma	6.88952e-07	1.94278e-06	TRUE	hit	6.3639
833	MET	P08581|P08581-2	Hepatocyte growth factor receptor OS=Homo sapiens GN=MET PE=1 SV=4|Isoform 2 of Hepatocyte growth factor receptor OS=Homo sapiens GN=MET	1	4	3	2	5.7298	2.74003	19.8113	12.6117	2.05307e-06	4.56594e-06	5.6885	0.990091	1	1	WT - Control	limma	2.05307e-06	4.56594e-06	TRUE	hit	5.7298
834	PDK3	Q15120|Q15120-2	[Pyruvate dehydrogenase (acetyl-transferring)] kinase isozyme 3, mitochondrial OS=Homo sapiens GN=PDK3 PE=1 SV=1|Isoform 2 of [Pyruvate dehydrogenase (acetyl-transferring)] kinase isozyme 3, mitochondrial OS=Homo sapiens GN=PDK3	1	4	3	6	6.56494	4.98881	21.8662	12.6114	6.92365e-07	1.94964e-06	6.6197	0.990091	1	1	WT - Control	limma	6.92365e-07	1.94964e-06	TRUE	hit	6.56494
835	ABCF2	Q9UG63|Q9UG63-2	ATP-binding cassette sub-family F member 2 OS=Homo sapiens GN=ABCF2 PE=1 SV=2|Isoform 2 of ATP-binding cassette sub-family F member 2 OS=Homo sapiens GN=ABCF2	1	4	3	4	6.69611	3.05741	21.6943	12.6083	6.9376e-07	1.95115e-06	6.61761	0.990093	1	1	WT - Control	limma	6.9376e-07	1.95115e-06	TRUE	hit	6.69611
836	ARCN1	B0YIW6|P48444	Archain 1, isoform CRA_a OS=Homo sapiens GN=ARCN1 PE=1 SV=1|Coatomer subunit delta OS=Homo sapiens GN=ARCN1 PE=1 SV=1	1	4	3	6	6.56183	2.48647	21.6821	12.5928	7.00844e-07	1.96643e-06	6.60703	0.990105	1	1	WT - Control	limma	7.00844e-07	1.96643e-06	TRUE	hit	6.56183
837	HIP1R	O75146	Huntingtin-interacting protein 1-related protein OS=Homo sapiens GN=HIP1R PE=1 SV=2	1	4	3	3	5.60129	2.24249	20.4244	12.5927	7.0093e-07	1.96643e-06	6.60691	0.990105	1	1	WT - Control	limma	7.0093e-07	1.96643e-06	TRUE	hit	5.60129
838	UTP11	Q9Y3A2	Probable U3 small nucleolar RNA-associated protein 11 OS=Homo sapiens GN=UTP11 PE=1 SV=2	1	4	3	4	6.0293	2.39281	21.4935	12.5868	7.03637e-07	1.97158e-06	6.60289	0.99011	1	1	WT - Control	limma	7.03637e-07	1.97158e-06	TRUE	hit	6.0293
839	NIPBL	Q6KC79|Q6KC79-2	Nipped-B-like protein OS=Homo sapiens GN=NIPBL PE=1 SV=2|Isoform 2 of Nipped-B-like protein OS=Homo sapiens GN=NIPBL	1	4	3	2	5.58491	2.35857	19.6146	12.5845	7.04709e-07	1.97214e-06	6.60131	0.990112	1	1	WT - Control	limma	7.04709e-07	1.97214e-06	TRUE	hit	5.58491
840	SLC1A4	P43007	Neutral amino acid transporter A OS=Homo sapiens GN=SLC1A4 PE=1 SV=1	1	4	3	5	5.88726	3.6146	21.4561	12.5675	7.12662e-07	1.99193e-06	6.58963	0.990125	1	1	WT - Control	limma	7.12662e-07	1.99193e-06	TRUE	hit	5.88726
841	NSUN5	Q96P11|Q96P11-2|Q96P11-4|Q96P11-5	Probable 28S rRNA (cytosine-C(5))-methyltransferase OS=Homo sapiens GN=NSUN5 PE=1 SV=2|Isoform 2 of Probable 28S rRNA (cytosine-C(5))-methyltransferase OS=Homo sapiens GN=NSUN5|Isoform 4 of Probable 28S rRNA (cytosine-C(5))-methyltransferase OS=Homo sapiens GN=NSUN5|Isoform 5 of Probable 28S rRNA (cytosine-C(5))-methyltransferase OS=Homo sapiens GN=NSUN5	1	4	3	2	6.39428	2.52898	20.6868	12.5575	7.17359e-07	2.00259e-06	6.58279	0.990133	1	1	WT - Control	limma	7.17359e-07	2.00259e-06	TRUE	hit	6.39428
842	ALG1	K7EID2|Q9BT22|Q9BT22-2	Chitobiosyldiphosphodolichol beta-mannosyltransferase (Fragment) OS=Homo sapiens GN=ALG1 PE=1 SV=7|Chitobiosyldiphosphodolichol beta-mannosyltransferase OS=Homo sapiens GN=ALG1 PE=1 SV=2|Isoform 2 of Chitobiosyldiphosphodolichol beta-mannosyltransferase OS=Homo sapiens GN=ALG1	1	4	3	2	6.11618	4.50049	20.8413	12.5498	7.21013e-07	2.01031e-06	6.5775	0.990139	1	1	WT - Control	limma	7.21013e-07	2.01031e-06	TRUE	hit	6.11618
843	DNAJC25	Q9H1X3	DnaJ homolog subfamily C member 25 OS=Homo sapiens GN=DNAJC25 PE=1 SV=1	1	4	3	3	5.81477	4.19503	20.7097	12.5442	7.23684e-07	2.01528e-06	6.57365	0.990144	1	1	WT - Control	limma	7.23684e-07	2.01528e-06	TRUE	hit	5.81477
844	B4GAT1	O43505	Beta-1,4-glucuronyltransferase 1 OS=Homo sapiens GN=B4GAT1 PE=1 SV=1	1	4	3	3	5.99376	3.27524	20.9313	12.5408	7.25317e-07	2.01734e-06	6.5713	0.990146	1	1	WT - Control	limma	7.25317e-07	2.01734e-06	TRUE	hit	5.99376
845	MAN2B1	O00754|O00754-2	Lysosomal alpha-mannosidase OS=Homo sapiens GN=MAN2B1 PE=1 SV=3|Isoform 2 of Lysosomal alpha-mannosidase OS=Homo sapiens GN=MAN2B1	1	4	3	2	5.81274	3.03329	19.8513	12.5339	2.1489e-06	4.73259e-06	5.6417	0.990152	1	1	WT - Control	limma	2.1489e-06	4.73259e-06	TRUE	hit	5.81274
846	NRAS	P01111	GTPase NRas OS=Homo sapiens GN=NRAS PE=1 SV=1	1	4	3	2	6.20593	2.57451	20.6001	12.5279	7.3151e-07	2.03032e-06	6.56245	0.990156	1	1	WT - Control	limma	7.3151e-07	2.03032e-06	TRUE	hit	6.20593
847	OCRL	Q01968	Inositol polyphosphate 5-phosphatase OCRL-1 OS=Homo sapiens GN=OCRL PE=1 SV=3	1	4	3	6	5.91331	2.64979	21.2872	12.5274	7.31775e-07	2.03032e-06	6.56207	0.990157	1	1	WT - Control	limma	7.31775e-07	2.03032e-06	TRUE	hit	5.91331
848	BRAT1	Q6PJG6	BRCA1-associated ATM activator 1 OS=Homo sapiens GN=BRAT1 PE=1 SV=2	1	4	3	4	6.47397	3.37953	21.075	12.5132	7.38645e-07	2.04437e-06	6.55234	0.990168	1	1	WT - Control	limma	7.38645e-07	2.04437e-06	TRUE	hit	6.47397
849	ITPR3	Q14573	Inositol 1,4,5-trisphosphate receptor type 3 OS=Homo sapiens GN=ITPR3 PE=1 SV=2	1	4	3	3	5.59238	2.88276	20.2695	12.5109	7.39804e-07	2.04507e-06	6.55071	0.99017	1	1	WT - Control	limma	7.39804e-07	2.04507e-06	TRUE	hit	5.59238
850	TTC30A	Q86WT1	Tetratricopeptide repeat protein 30A OS=Homo sapiens GN=TTC30A PE=2 SV=3	1	4	3	4	5.71034	3.25523	20.5405	12.5082	7.41095e-07	2.04615e-06	6.54889	0.990172	1	1	WT - Control	limma	7.41095e-07	2.04615e-06	TRUE	hit	5.71034
851	MARK2	E7ETY4|E9PC69|Q7KZI7|Q7KZI7-10|Q7KZI7-11|Q7KZI7-12|Q7KZI7-13|Q7KZI7-14|Q7KZI7-15|Q7KZI7-16|Q7KZI7-2|Q7KZI7-3|Q7KZI7-4|Q7KZI7-5|Q7KZI7-6|Q7KZI7-7|Q7KZI7-8|Q7KZI7-9	Serine/threonine-protein kinase MARK2 OS=Homo sapiens GN=MARK2 PE=1 SV=1|Serine/threonine-protein kinase MARK2 OS=Homo sapiens GN=MARK2 PE=1 SV=3|Serine/threonine-protein kinase MARK2 OS=Homo sapiens GN=MARK2 PE=1 SV=2|Isoform 10 of Serine/threonine-protein kinase MARK2 OS=Homo sapiens GN=MARK2|Isoform 11 of Serine/threonine-protein kinase MARK2 OS=Homo sapiens GN=MARK2|Isoform 12 of Serine/threo…	1	4	3	4	5.85752	2.18725	21.1239	12.4955	7.47391e-07	2.06102e-06	6.54008	0.990182	1	1	WT - Control	limma	7.47391e-07	2.06102e-06	TRUE	hit	5.85752
852	TROVE2	P10155|P10155-3|P10155-4|P10155-5	60 kDa SS-A/Ro ribonucleoprotein OS=Homo sapiens GN=TROVE2 PE=1 SV=2|Isoform 3 of 60 kDa SS-A/Ro ribonucleoprotein OS=Homo sapiens GN=TROVE2|Isoform 4 of 60 kDa SS-A/Ro ribonucleoprotein OS=Homo sapiens GN=TROVE2|Isoform 5 of 60 kDa SS-A/Ro ribonucleoprotein OS=Homo sapiens GN=TROVE2	1	4	3	4	6.71049	2.638	22.5408	12.4882	7.50982e-07	2.0684e-06	6.53509	0.990188	1	1	WT - Control	limma	7.50982e-07	2.0684e-06	TRUE	hit	6.71049
853	PON2	A0A0J9YXF2	Paraoxonase 2, isoform CRA_a OS=Homo sapiens GN=PON2 PE=1 SV=1	1	4	3	6	7.16094	3.30514	22.2196	12.4839	7.5313e-07	2.07179e-06	6.53211	0.990191	1	1	WT - Control	limma	7.5313e-07	2.07179e-06	TRUE	hit	7.16094
854	GTF2I	P78347|P78347-2|P78347-3|P78347-4	General transcription factor II-I OS=Homo sapiens GN=GTF2I PE=1 SV=2|Isoform 2 of General transcription factor II-I OS=Homo sapiens GN=GTF2I|Isoform 3 of General transcription factor II-I OS=Homo sapiens GN=GTF2I|Isoform 4 of General transcription factor II-I OS=Homo sapiens GN=GTF2I	1	4	3	9	6.66023	3.14757	23.2068	12.4651	7.6258e-07	2.09524e-06	6.51912	0.990206	1	1	WT - Control	limma	7.6258e-07	2.09524e-06	TRUE	hit	6.66023
855	ARL13B	Q3SXY8	ADP-ribosylation factor-like protein 13B OS=Homo sapiens GN=ARL13B PE=1 SV=1	1	4	3	3	5.65181	2.41092	20.6466	12.4563	7.67058e-07	2.10499e-06	6.51302	0.990213	1	1	WT - Control	limma	7.67058e-07	2.10499e-06	TRUE	hit	5.65181
856	CNNM1	Q9NRU3|Q9NRU3-2	Metal transporter CNNM1 OS=Homo sapiens GN=CNNM1 PE=2 SV=3|Isoform 2 of Metal transporter CNNM1 OS=Homo sapiens GN=CNNM1	1	4	3	2	5.98277	2.7998	20.0916	12.4457	2.26378e-06	4.94027e-06	5.58821	0.990221	1	1	WT - Control	limma	2.26378e-06	4.94027e-06	TRUE	hit	5.98277
857	PPP2R1B	P30154|P30154-2|P30154-3	Serine/threonine-protein phosphatase 2A 65 kDa regulatory subunit A beta isoform OS=Homo sapiens GN=PPP2R1B PE=1 SV=3|Isoform 2 of Serine/threonine-protein phosphatase 2A 65 kDa regulatory subunit A beta isoform OS=Homo sapiens GN=PPP2R1B|Isoform 3 of Serine/threonine-protein phosphatase 2A 65 kDa regulatory subunit A beta isoform OS=Homo sapiens GN=PPP2R1B	1	4	3	2	6.02717	2.30707	21.5765	12.442	7.74385e-07	2.11996e-06	6.50311	0.990224	1	1	WT - Control	limma	7.74385e-07	2.11996e-06	TRUE	hit	6.02717
858	PTPN23	Q9H3S7	Tyrosine-protein phosphatase non-receptor type 23 OS=Homo sapiens GN=PTPN23 PE=1 SV=1	1	4	3	3	5.98909	2.44038	20.9782	12.4392	7.75864e-07	2.12145e-06	6.50112	0.990226	1	1	WT - Control	limma	7.75864e-07	2.12145e-06	TRUE	hit	5.98909
859	SYNJ2BP	A0A087WUM0|A0A087WYV9|A0A087X1F5	Protein SYNJ2BP-COX16 (Fragment) OS=Homo sapiens GN=SYNJ2BP-COX16 PE=4 SV=1|Protein SYNJ2BP-COX16 OS=Homo sapiens GN=SYNJ2BP-COX16 PE=4 SV=1|Protein SYNJ2BP-COX16 (Fragment) OS=Homo sapiens GN=SYNJ2BP-COX16 PE=4 SV=5	1	4	3	3	5.67569	3.46941	20.3667	12.4325	7.79305e-07	2.12713e-06	6.49651	0.990231	1	1	WT - Control	limma	7.79305e-07	2.12713e-06	TRUE	hit	5.67569
860	PEG10	A0A087WUL4|A0A087WX23|A0A087WXK2|Q86TG7	Retrotransposon-derived protein PEG10 OS=Homo sapiens GN=PEG10 PE=1 SV=1|Retrotransposon-derived protein PEG10 OS=Homo sapiens GN=PEG10 PE=1 SV=1|Retrotransposon-derived protein PEG10 OS=Homo sapiens GN=PEG10 PE=1 SV=1|Retrotransposon-derived protein PEG10 OS=Homo sapiens GN=PEG10 PE=1 SV=2	1	4	3	2	5.86832	2.22457	20.8238	12.4315	7.79823e-07	2.12713e-06	6.49582	0.990232	1	1	WT - Control	limma	7.79823e-07	2.12713e-06	TRUE	hit	5.86832
861	NUP37	F8VTY2|Q8NFH4	Nucleoporin Nup37 (Fragment) OS=Homo sapiens GN=NUP37 PE=1 SV=7|Nucleoporin Nup37 OS=Homo sapiens GN=NUP37 PE=1 SV=1	1	4	3	2	5.82099	2.87394	20.4522	12.4253	7.83035e-07	2.13189e-06	6.49154	0.990237	1	1	WT - Control	limma	7.83035e-07	2.13189e-06	TRUE	hit	5.82099
862	NDUFS3	O75489	NADH dehydrogenase [ubiquinone] iron-sulfur protein 3, mitochondrial OS=Homo sapiens GN=NDUFS3 PE=1 SV=1	1	4	3	4	6.35817	3.47614	21.4082	12.4245	7.83452e-07	2.13189e-06	6.49098	0.990238	1	1	WT - Control	limma	7.83452e-07	2.13189e-06	TRUE	hit	6.35817
863	NRP1	E9PEP6|O14786	Neuropilin-1 OS=Homo sapiens GN=NRP1 PE=1 SV=2|Neuropilin-1 OS=Homo sapiens GN=NRP1 PE=1 SV=3	1	4	3	2	5.69825	2.16457	20.1622	12.4203	7.85668e-07	2.13431e-06	6.48804	0.990241	1	1	WT - Control	limma	7.85668e-07	2.13431e-06	TRUE	hit	5.69825
864	PTK7	Q13308|Q13308-2|Q13308-3|Q13308-4|Q13308-6	Inactive tyrosine-protein kinase 7 OS=Homo sapiens GN=PTK7 PE=1 SV=2|Isoform 2 of Inactive tyrosine-protein kinase 7 OS=Homo sapiens GN=PTK7|Isoform 3 of Inactive tyrosine-protein kinase 7 OS=Homo sapiens GN=PTK7|Isoform 4 of Inactive tyrosine-protein kinase 7 OS=Homo sapiens GN=PTK7|Isoform 6 of Inactive tyrosine-protein kinase 7 OS=Homo sapiens GN=PTK7	1	4	3	7	6.40006	3.09686	22.383	12.4192	7.86225e-07	2.13431e-06	6.4873	0.990242	1	1	WT - Control	limma	7.86225e-07	2.13431e-06	TRUE	hit	6.40006
865	HEATR3	Q7Z4Q2	HEAT repeat-containing protein 3 OS=Homo sapiens GN=HEATR3 PE=1 SV=2	1	4	3	3	5.84019	2.29569	20.8576	12.4153	7.88292e-07	2.13736e-06	6.48456	0.990245	1	1	WT - Control	limma	7.88292e-07	2.13736e-06	TRUE	hit	5.84019
866	FAT3	Q8TDW7|Q8TDW7-3	Protocadherin Fat 3 OS=Homo sapiens GN=FAT3 PE=2 SV=2|Isoform 3 of Protocadherin Fat 3 OS=Homo sapiens GN=FAT3	1	4	3	3	5.85171	3.00554	20.7554	12.3964	7.98302e-07	2.16191e-06	6.47141	0.99026	1	1	WT - Control	limma	7.98302e-07	2.16191e-06	TRUE	hit	5.85171
867	WRN	Q14191	Werner syndrome ATP-dependent helicase OS=Homo sapiens GN=WRN PE=1 SV=2	1	4	3	3	5.76338	2.80597	20.6998	12.3956	2.3321e-06	5.04286e-06	5.55764	0.99026	1	1	WT - Control	limma	2.3321e-06	5.04286e-06	TRUE	hit	5.76338
868	C1QBP	Q07021	Complement component 1 Q subcomponent-binding protein, mitochondrial OS=Homo sapiens GN=C1QBP PE=1 SV=1	1	4	3	3	7.17944	2.65448	24.1241	12.3705	8.12239e-07	2.19702e-06	6.45336	0.99028	1	1	WT - Control	limma	8.12239e-07	2.19702e-06	TRUE	hit	7.17944
869	SFXN1	Q9H9B4	Sideroflexin-1 OS=Homo sapiens GN=SFXN1 PE=1 SV=4	1	4	3	5	6.86227	3.35401	22.5139	12.3531	8.21712e-07	2.21999e-06	6.44127	0.990294	1	1	WT - Control	limma	8.21712e-07	2.21999e-06	TRUE	hit	6.86227
870	FASTKD5	Q7L8L6	FAST kinase domain-containing protein 5, mitochondrial OS=Homo sapiens GN=FASTKD5 PE=1 SV=1	1	4	3	7	6.80422	4.38593	22.1474	12.3261	8.3676e-07	2.24882e-06	6.42234	0.990315	1	1	WT - Control	limma	8.3676e-07	2.24882e-06	TRUE	hit	6.80422
871	TRMT1	Q9NXH9|Q9NXH9-2	tRNA (guanine(26)-N(2))-dimethyltransferase OS=Homo sapiens GN=TRMT1 PE=1 SV=1|Isoform 2 of tRNA (guanine(26)-N(2))-dimethyltransferase OS=Homo sapiens GN=TRMT1	1	4	3	3	6.07628	2.4613	20.263	12.325	8.37349e-07	2.24882e-06	6.42161	0.990316	1	1	WT - Control	limma	8.37349e-07	2.24882e-06	TRUE	hit	6.07628
872	C5ORF34	Q96MH7	Uncharacterized protein C5orf34 OS=Homo sapiens GN=C5orf34 PE=2 SV=2	1	4	3	4	5.88689	2.72716	20.0383	12.315	8.42991e-07	2.26129e-06	6.4146	0.990324	1	1	WT - Control	limma	8.42991e-07	2.26129e-06	TRUE	hit	5.88689
873	SLC25A26	F8WAB8|H0YCZ5|H0YF50|H7C430|Q70HW3|Q70HW3-2|Q70HW3-3	S-adenosylmethionine mitochondrial carrier protein OS=Homo sapiens GN=SLC25A26 PE=1 SV=1|S-adenosylmethionine mitochondrial carrier protein OS=Homo sapiens GN=SLC25A26 PE=1 SV=2|S-adenosylmethionine mitochondrial carrier protein (Fragment) OS=Homo sapiens GN=SLC25A26 PE=1 SV=1|S-adenosylmethionine mitochondrial carrier protein OS=Homo sapiens GN=SLC25A26 PE=1 SV=2|S-adenosylmethionine mitochondri…	1	4	3	2	5.84395	2.36235	20.3327	12.313	8.44135e-07	2.26168e-06	6.41319	0.990325	1	1	WT - Control	limma	8.44135e-07	2.26168e-06	TRUE	hit	5.84395
874	P3H1	Q32P28|Q32P28-3|Q32P28-4	Prolyl 3-hydroxylase 1 OS=Homo sapiens GN=P3H1 PE=1 SV=2|Isoform 3 of Prolyl 3-hydroxylase 1 OS=Homo sapiens GN=P3H1|Isoform 4 of Prolyl 3-hydroxylase 1 OS=Homo sapiens GN=P3H1	1	4	3	2	6.09775	2.3423	19.9712	12.2971	8.53187e-07	2.27957e-06	6.40206	0.990338	1	1	WT - Control	limma	8.53187e-07	2.27957e-06	TRUE	hit	6.09775
875	SV2A	Q7L0J3|Q7L0J3-2	Synaptic vesicle glycoprotein 2A OS=Homo sapiens GN=SV2A PE=1 SV=1|Isoform 2 of Synaptic vesicle glycoprotein 2A OS=Homo sapiens GN=SV2A	1	4	3	3	6.72099	3.49601	21.5418	12.2942	8.54838e-07	2.27957e-06	6.40004	0.99034	1	1	WT - Control	limma	8.54838e-07	2.27957e-06	TRUE	hit	6.72099
876	COG3	Q96JB2	Conserved oligomeric Golgi complex subunit 3 OS=Homo sapiens GN=COG3 PE=1 SV=3	1	4	3	2	5.70704	3.20638	20.2898	12.2867	8.59184e-07	2.28846e-06	6.39475	0.990346	1	1	WT - Control	limma	8.59184e-07	2.28846e-06	TRUE	hit	5.70704
877	RPS23	D6RD47|P62266	40S ribosomal protein S23 OS=Homo sapiens GN=RPS23 PE=1 SV=1|40S ribosomal protein S23 OS=Homo sapiens GN=RPS23 PE=1 SV=3	1	4	3	3	7.4736	2.28294	22.5624	12.2795	8.63368e-07	2.2969e-06	6.38968	0.990352	1	1	WT - Control	limma	8.63368e-07	2.2969e-06	TRUE	hit	7.4736
878	TUBGCP3	Q96CW5	Gamma-tubulin complex component 3 OS=Homo sapiens GN=TUBGCP3 PE=1 SV=2	1	4	3	6	6.39147	2.69566	22.3471	12.2761	8.65314e-07	2.29938e-06	6.38733	0.990354	1	1	WT - Control	limma	8.65314e-07	2.29938e-06	TRUE	hit	6.39147
879	INA	Q16352	Alpha-internexin OS=Homo sapiens GN=INA PE=1 SV=2	1	4	3	5	6.07284	2.75522	21.2942	12.2713	8.68158e-07	2.304e-06	6.38391	0.990358	1	1	WT - Control	limma	8.68158e-07	2.304e-06	TRUE	hit	6.07284
880	PLOD1	Q02809|Q02809-2	Procollagen-lysine,2-oxoglutarate 5-dioxygenase 1 OS=Homo sapiens GN=PLOD1 PE=1 SV=2|Isoform 2 of Procollagen-lysine,2-oxoglutarate 5-dioxygenase 1 OS=Homo sapiens GN=PLOD1	1	4	3	4	6.43148	3.2958	20.6928	12.2697	8.6909e-07	2.304e-06	6.38279	0.990359	1	1	WT - Control	limma	8.6909e-07	2.304e-06	TRUE	hit	6.43148
881	SPG11	Q96JI7|Q96JI7-3	Spatacsin OS=Homo sapiens GN=SPG11 PE=1 SV=3|Isoform 3 of Spatacsin OS=Homo sapiens GN=SPG11	1	4	3	4	5.91041	3.01257	21.2972	12.2639	8.72468e-07	2.31025e-06	6.37874	0.990364	1	1	WT - Control	limma	8.72468e-07	2.31025e-06	TRUE	hit	5.91041
882	TMEM177	Q53S58	Transmembrane protein 177 OS=Homo sapiens GN=TMEM177 PE=2 SV=1	1	4	3	2	6.50115	3.42437	20.9243	12.2576	8.76195e-07	2.31741e-06	6.37429	0.990369	1	1	WT - Control	limma	8.76195e-07	2.31741e-06	TRUE	hit	6.50115
883	HADHB	F5GZQ3|P55084	Trifunctional enzyme subunit beta, mitochondrial OS=Homo sapiens GN=HADHB PE=1 SV=1|Trifunctional enzyme subunit beta, mitochondrial OS=Homo sapiens GN=HADHB PE=1 SV=3	1	4	3	5	6.37203	2.54879	21.8622	12.255	8.77721e-07	2.31874e-06	6.37247	0.990371	1	1	WT - Control	limma	8.77721e-07	2.31874e-06	TRUE	hit	6.37203
884	PHKB	Q93100|Q93100-2|Q93100-3|Q93100-4	Phosphorylase b kinase regulatory subunit beta OS=Homo sapiens GN=PHKB PE=1 SV=3|Isoform 2 of Phosphorylase b kinase regulatory subunit beta OS=Homo sapiens GN=PHKB|Isoform 3 of Phosphorylase b kinase regulatory subunit beta OS=Homo sapiens GN=PHKB|Isoform 4 of Phosphorylase b kinase regulatory subunit beta OS=Homo sapiens GN=PHKB	1	4	3	6	5.93492	4.22478	21.101	12.2354	8.89413e-07	2.34416e-06	6.35866	0.990386	1	1	WT - Control	limma	8.89413e-07	2.34416e-06	TRUE	hit	5.93492
885	MCCC2	Q9HCC0|Q9HCC0-2	Methylcrotonoyl-CoA carboxylase beta chain, mitochondrial OS=Homo sapiens GN=MCCC2 PE=1 SV=1|Isoform 2 of Methylcrotonoyl-CoA carboxylase beta chain, mitochondrial OS=Homo sapiens GN=MCCC2	1	4	3	4	6.49544	3.15856	21.2447	12.2312	8.91972e-07	2.34668e-06	6.35566	0.99039	1	1	WT - Control	limma	8.91972e-07	2.34668e-06	TRUE	hit	6.49544
886	TMEM161A	K7EPA3|K7EQ34|Q9NX61|U3KQT6	Transmembrane protein 161A OS=Homo sapiens GN=TMEM161A PE=1 SV=2|Transmembrane protein 161A (Fragment) OS=Homo sapiens GN=TMEM161A PE=1 SV=1|Transmembrane protein 161A OS=Homo sapiens GN=TMEM161A PE=1 SV=1|Transmembrane protein 161A OS=Homo sapiens GN=TMEM161A PE=1 SV=1	1	4	3	3	6.36418	4.03643	21.3489	12.2304	8.92443e-07	2.34668e-06	6.35511	0.99039	1	1	WT - Control	limma	8.92443e-07	2.34668e-06	TRUE	hit	6.36418
887	FBXL3	Q9UKT7	F-box/LRR-repeat protein 3 OS=Homo sapiens GN=FBXL3 PE=1 SV=1	1	4	3	3	5.8998	2.93323	20.8481	12.219	2.59185e-06	5.57261e-06	5.44894	0.990399	1	1	WT - Control	limma	2.59185e-06	5.57261e-06	TRUE	hit	5.8998
888	DPM1	H0Y368|O60762|Q5QPK2	Dolichol-phosphate mannosyltransferase subunit 1 (Fragment) OS=Homo sapiens GN=DPM1 PE=1 SV=1|Dolichol-phosphate mannosyltransferase subunit 1 OS=Homo sapiens GN=DPM1 PE=1 SV=1|Dolichol-phosphate mannosyltransferase subunit 1 OS=Homo sapiens GN=DPM1 PE=1 SV=1	1	4	3	3	6.92453	4.72451	22.24	12.2171	9.00458e-07	2.36501e-06	6.34578	0.990401	1	1	WT - Control	limma	9.00458e-07	2.36501e-06	TRUE	hit	6.92453
889	SEC63	Q9UGP8	Translocation protein SEC63 homolog OS=Homo sapiens GN=SEC63 PE=1 SV=2	1	4	3	6	6.75489	4.83512	22.4479	12.2152	9.01617e-07	2.36521e-06	6.34443	0.990402	1	1	WT - Control	limma	9.01617e-07	2.36521e-06	TRUE	hit	6.75489
890	DARS	P14868	Aspartate--tRNA ligase, cytoplasmic OS=Homo sapiens GN=DARS PE=1 SV=2	1	4	3	15	6.86139	2.54013	23.9771	12.2136	9.02625e-07	2.36521e-06	6.34327	0.990403	1	1	WT - Control	limma	9.02625e-07	2.36521e-06	TRUE	hit	6.86139
891	THTPA	Q9BU02	Thiamine-triphosphatase OS=Homo sapiens GN=THTPA PE=1 SV=3	1	4	3	3	6.0175	2.59675	20.4637	12.1927	9.15469e-07	2.39333e-06	6.32851	0.99042	1	1	WT - Control	limma	9.15469e-07	2.39333e-06	TRUE	hit	6.0175
892	CAMK2G	A0A0A0MS52|A0A0A0MT11|Q13555|Q13555-10|Q13555-2|Q13555-3|Q13555-4|Q13555-5|Q13555-6|Q13555-7|Q13555-8|Q13555-9|Q5SWX3	Calcium/calmodulin-dependent protein kinase (CaM kinase) II gamma, isoform CRA_a OS=Homo sapiens GN=CAMK2G PE=1 SV=1|Calcium/calmodulin-dependent protein kinase type II subunit gamma OS=Homo sapiens GN=CAMK2G PE=1 SV=1|Calcium/calmodulin-dependent protein kinase type II subunit gamma OS=Homo sapiens GN=CAMK2G PE=1 SV=3|Isoform 10 of Calcium/calmodulin-dependent protein kinase type II subunit gamm…	1	4	3	3	5.89293	3.74606	21.3199	12.191	9.16552e-07	2.3934e-06	6.32728	0.990421	1	1	WT - Control	limma	9.16552e-07	2.3934e-06	TRUE	hit	5.89293
893	RPS15A	I3L3P7|P62244	40S ribosomal protein S15a OS=Homo sapiens GN=RPS15A PE=1 SV=1|40S ribosomal protein S15a OS=Homo sapiens GN=RPS15A PE=1 SV=2	1	4	3	4	7.17805	3.81476	22.3796	12.1848	9.20407e-07	2.40069e-06	6.32289	0.990426	1	1	WT - Control	limma	9.20407e-07	2.40069e-06	TRUE	hit	7.17805
894	TRABD	J3KPT4|Q9H4I3	TraB domain-containing protein OS=Homo sapiens GN=TRABD PE=1 SV=1|TraB domain-containing protein OS=Homo sapiens GN=TRABD PE=1 SV=1	1	4	3	5	6.04361	2.79654	21.6369	12.1733	9.27615e-07	2.41671e-06	6.31475	0.990435	1	1	WT - Control	limma	9.27615e-07	2.41671e-06	TRUE	hit	6.04361
895	MOCS3	O95396	Adenylyltransferase and sulfurtransferase MOCS3 OS=Homo sapiens GN=MOCS3 PE=1 SV=1	1	4	3	3	6.2136	3.4367	21.4127	12.169	9.30316e-07	2.41818e-06	6.31171	0.990438	1	1	WT - Control	limma	9.30316e-07	2.41818e-06	TRUE	hit	6.2136
896	TTC28	A0A087WW06|Q96AY4	Tetratricopeptide repeat protein 28 OS=Homo sapiens GN=TTC28 PE=1 SV=1|Tetratricopeptide repeat protein 28 OS=Homo sapiens GN=TTC28 PE=1 SV=4	1	4	3	5	5.84821	2.71115	20.8147	12.1629	9.34192e-07	2.42513e-06	6.30737	0.990443	1	1	WT - Control	limma	9.34192e-07	2.42513e-06	TRUE	hit	5.84821
897	SHMT1	P34896|P34896-2	Serine hydroxymethyltransferase, cytosolic OS=Homo sapiens GN=SHMT1 PE=1 SV=1|Isoform 2 of Serine hydroxymethyltransferase, cytosolic OS=Homo sapiens GN=SHMT1	1	4	3	5	6.42644	2.07583	22.2684	12.1614	9.35133e-07	2.42513e-06	6.30632	0.990444	1	1	WT - Control	limma	9.35133e-07	2.42513e-06	TRUE	hit	6.42644
898	LMNB1	P20700	Lamin-B1 OS=Homo sapiens GN=LMNB1 PE=1 SV=2	1	4	3	9	6.9821	3.34104	23.3123	12.1567	9.38117e-07	2.43009e-06	6.30299	0.990448	1	1	WT - Control	limma	9.38117e-07	2.43009e-06	TRUE	hit	6.9821
899	TTC13	Q8NBP0	Tetratricopeptide repeat protein 13 OS=Homo sapiens GN=TTC13 PE=2 SV=3	1	4	3	10	6.36838	5.43246	22.2665	12.1547	9.39374e-07	2.43056e-06	6.30159	0.99045	1	1	WT - Control	limma	9.39374e-07	2.43056e-06	TRUE	hit	6.36838
900	PGS1	Q32NB8	CDP-diacylglycerol--glycerol-3-phosphate 3-phosphatidyltransferase, mitochondrial OS=Homo sapiens GN=PGS1 PE=2 SV=1	1	4	3	2	6.17581	3.15648	20.8498	12.1419	2.71544e-06	5.80524e-06	5.43554	0.99046	1	1	WT - Control	limma	2.71544e-06	5.80524e-06	TRUE	hit	6.17581
901	IBTK	E7EPI0|Q9P2D0	Inhibitor of Bruton tyrosine kinase OS=Homo sapiens GN=IBTK PE=1 SV=1|Inhibitor of Bruton tyrosine kinase OS=Homo sapiens GN=IBTK PE=1 SV=3	1	4	3	8	6.23744	3.68438	21.9705	12.1314	9.54392e-07	2.4666e-06	6.28502	0.990468	1	1	WT - Control	limma	9.54392e-07	2.4666e-06	TRUE	hit	6.23744
902	CPSF2	Q9P2I0	Cleavage and polyadenylation specificity factor subunit 2 OS=Homo sapiens GN=CPSF2 PE=1 SV=2	1	4	3	8	6.72168	2.28297	22.7282	12.1236	9.59466e-07	2.47689e-06	6.27948	0.990474	1	1	WT - Control	limma	9.59466e-07	2.47689e-06	TRUE	hit	6.72168
903	ZNF234	Q14588	Zinc finger protein 234 OS=Homo sapiens GN=ZNF234 PE=2 SV=3	1	4	3	3	5.79697	2.11758	21.1067	12.1189	9.6258e-07	2.4821e-06	6.27609	0.990478	1	1	WT - Control	limma	9.6258e-07	2.4821e-06	TRUE	hit	5.79697
904	NID1	P14543|P14543-2	Nidogen-1 OS=Homo sapiens GN=NID1 PE=1 SV=3|Isoform 2 of Nidogen-1 OS=Homo sapiens GN=NID1	1	4	3	4	6.47508	2.50866	20.9898	12.0998	9.7517e-07	2.50885e-06	6.26251	0.990493	1	1	WT - Control	limma	9.7517e-07	2.50885e-06	TRUE	hit	6.47508
905	DARS2	Q6PI48	Aspartate--tRNA ligase, mitochondrial OS=Homo sapiens GN=DARS2 PE=1 SV=1	1	4	3	7	6.3549	2.73162	22.451	12.0853	9.8484e-07	2.53085e-06	6.2522	0.990504	1	1	WT - Control	limma	9.8484e-07	2.53085e-06	TRUE	hit	6.3549
906	NUP153	P49790|P49790-3	Nuclear pore complex protein Nup153 OS=Homo sapiens GN=NUP153 PE=1 SV=2|Isoform 3 of Nuclear pore complex protein Nup153 OS=Homo sapiens GN=NUP153	1	4	3	5	5.96418	2.38017	21.3667	12.0824	9.86824e-07	2.53307e-06	6.2501	0.990506	1	1	WT - Control	limma	9.86824e-07	2.53307e-06	TRUE	hit	5.96418
907	FSTL4	Q6MZW2	Follistatin-related protein 4 OS=Homo sapiens GN=FSTL4 PE=2 SV=3	1	4	3	4	5.93475	2.62511	20.3954	12.0648	2.84572e-06	6.02122e-06	5.35257	0.99052	1	1	WT - Control	limma	2.84572e-06	6.02122e-06	TRUE	hit	5.93475
908	IPO7	O95373	Importin-7 OS=Homo sapiens GN=IPO7 PE=1 SV=1	1	4	3	3	6.4251	2.76068	21.4426	12.0567	1.0043e-06	2.575e-06	6.23175	0.990527	1	1	WT - Control	limma	1.0043e-06	2.575e-06	TRUE	hit	6.4251
909	TRMT2A	F2Z2W7|Q8IZ69	tRNA (uracil-5-)-methyltransferase homolog A OS=Homo sapiens GN=TRMT2A PE=1 SV=1|tRNA (uracil-5-)-methyltransferase homolog A OS=Homo sapiens GN=TRMT2A PE=1 SV=2	1	4	3	7	6.07903	3.41446	21.4551	12.0382	1.01715e-06	2.60115e-06	6.21846	0.990541	1	1	WT - Control	limma	1.01715e-06	2.60115e-06	TRUE	hit	6.07903
910	SAPCD2	Q86UD0	Suppressor APC domain-containing protein 2 OS=Homo sapiens GN=SAPCD2 PE=1 SV=2	1	4	3	2	5.89553	2.32226	20.1644	12.037	1.01794e-06	2.60115e-06	6.21764	0.990542	1	1	WT - Control	limma	1.01794e-06	2.60115e-06	TRUE	hit	5.89553
911	KDELR1|KDELR2	M0R1Y2|P24390|P33947|P33947-2	ER lumen protein-retaining receptor (Fragment) OS=Homo sapiens GN=KDELR1 PE=1 SV=1|ER lumen protein-retaining receptor 1 OS=Homo sapiens GN=KDELR1 PE=1 SV=1|ER lumen protein-retaining receptor 2 OS=Homo sapiens GN=KDELR2 PE=1 SV=1|Isoform 2 of ER lumen protein-retaining receptor 2 OS=Homo sapiens GN=KDELR2	1	4	3	2	6.86222	4.82089	21.4816	12.0254	1.02608e-06	2.61796e-06	6.20932	0.990551	1	1	WT - Control	limma	1.02608e-06	2.61796e-06	TRUE	hit	6.86222
912	KDELC1	Q6UW63	KDEL motif-containing protein 1 OS=Homo sapiens GN=KDELC1 PE=1 SV=1	1	4	3	5	6.01085	2.82856	20.8699	12.0077	2.94658e-06	6.18263e-06	5.3166	0.990565	1	1	WT - Control	limma	2.94658e-06	6.18263e-06	TRUE	hit	6.01085
913	PDCD11	Q14690	Protein RRP5 homolog OS=Homo sapiens GN=PDCD11 PE=1 SV=3	1	4	3	3	5.922	2.1162	21.1558	12.0059	1.03993e-06	2.64558e-06	6.1953	0.990567	1	1	WT - Control	limma	1.03993e-06	2.64558e-06	TRUE	hit	5.922
914	TARS	P26639|P26639-2	Threonine--tRNA ligase, cytoplasmic OS=Homo sapiens GN=TARS PE=1 SV=3|Isoform 2 of Threonine--tRNA ligase, cytoplasmic OS=Homo sapiens GN=TARS	1	4	3	9	6.7467	2.49226	22.5252	12.0058	1.04e-06	2.64558e-06	6.19522	0.990567	1	1	WT - Control	limma	1.04e-06	2.64558e-06	TRUE	hit	6.7467
915	PSMD8	P48556|R4GMR5	26S proteasome non-ATPase regulatory subunit 8 OS=Homo sapiens GN=PSMD8 PE=1 SV=2|26S proteasome non-ATPase regulatory subunit 8 OS=Homo sapiens GN=PSMD8 PE=1 SV=1	1	4	3	4	6.71971	2.8533	22.765	11.9955	1.0474e-06	2.66141e-06	6.18781	0.990575	1	1	WT - Control	limma	1.0474e-06	2.66141e-06	TRUE	hit	6.71971
916	DDX41	J3KNN5|Q9UJV9	Probable ATP-dependent RNA helicase DDX41 (Fragment) OS=Homo sapiens GN=DDX41 PE=1 SV=1|Probable ATP-dependent RNA helicase DDX41 OS=Homo sapiens GN=DDX41 PE=1 SV=2	1	4	3	3	5.70457	2.07189	20.5985	11.9863	1.05402e-06	2.67523e-06	6.18122	0.990582	1	1	WT - Control	limma	1.05402e-06	2.67523e-06	TRUE	hit	5.70457
917	VIM	P08670	Vimentin OS=Homo sapiens GN=VIM PE=1 SV=4	1	4	3	15	7.25135	2.54154	24.7466	11.9814	1.05756e-06	2.67681e-06	6.17771	0.990586	1	1	WT - Control	limma	1.05756e-06	2.67681e-06	TRUE	hit	7.25135
918	GFPT1	Q06210|Q06210-2	Glutamine--fructose-6-phosphate aminotransferase [isomerizing] 1 OS=Homo sapiens GN=GFPT1 PE=1 SV=3|Isoform 2 of Glutamine--fructose-6-phosphate aminotransferase [isomerizing] 1 OS=Homo sapiens GN=GFPT1	1	4	3	9	7.17783	3.37945	22.908	11.9806	1.05819e-06	2.67681e-06	6.17709	0.990586	1	1	WT - Control	limma	1.05819e-06	2.67681e-06	TRUE	hit	7.17783
919	AKAP12	Q02952|Q02952-2|Q02952-3	A-kinase anchor protein 12 OS=Homo sapiens GN=AKAP12 PE=1 SV=4|Isoform 2 of A-kinase anchor protein 12 OS=Homo sapiens GN=AKAP12|Isoform 3 of A-kinase anchor protein 12 OS=Homo sapiens GN=AKAP12	1	4	3	5	6.11163	2.40928	22.0816	11.9806	1.05819e-06	2.67681e-06	6.17709	0.990586	1	1	WT - Control	limma	1.05819e-06	2.67681e-06	TRUE	hit	6.11163
920	CTH	P32929|P32929-2|P32929-3	Cystathionine gamma-lyase OS=Homo sapiens GN=CTH PE=1 SV=3|Isoform 2 of Cystathionine gamma-lyase OS=Homo sapiens GN=CTH|Isoform 3 of Cystathionine gamma-lyase OS=Homo sapiens GN=CTH	1	4	3	2	5.67139	2.89407	20	11.9649	3.02491e-06	6.32355e-06	5.28948	0.990599	1	1	WT - Control	limma	3.02491e-06	6.32355e-06	TRUE	hit	5.67139
921	ATG9A	Q7Z3C6|Q7Z3C6-2	Autophagy-related protein 9A OS=Homo sapiens GN=ATG9A PE=1 SV=3|Isoform 2 of Autophagy-related protein 9A OS=Homo sapiens GN=ATG9A	1	4	3	5	6.27397	2.92038	21.1139	11.9627	1.07125e-06	2.7038e-06	6.16426	0.9906	1	1	WT - Control	limma	1.07125e-06	2.7038e-06	TRUE	hit	6.27397
922	PSMG1	O95456|O95456-2	Proteasome assembly chaperone 1 OS=Homo sapiens GN=PSMG1 PE=1 SV=1|Isoform 2 of Proteasome assembly chaperone 1 OS=Homo sapiens GN=PSMG1	1	4	3	4	6.02851	2.68272	21.3892	11.9494	1.08116e-06	2.72577e-06	6.15462	0.990611	1	1	WT - Control	limma	1.08116e-06	2.72577e-06	TRUE	hit	6.02851
923	SCD	O00767	Acyl-CoA desaturase OS=Homo sapiens GN=SCD PE=1 SV=2	1	4	3	7	7.11622	4.07973	23.8114	11.9383	1.08945e-06	2.74057e-06	6.14663	0.99062	1	1	WT - Control	limma	1.08945e-06	2.74057e-06	TRUE	hit	7.11622
924	DDX52	Q9Y2R4	Probable ATP-dependent RNA helicase DDX52 OS=Homo sapiens GN=DDX52 PE=1 SV=3	1	4	3	2	6.19561	2.99534	21.6963	11.9303	1.09549e-06	2.74966e-06	6.14084	0.990626	1	1	WT - Control	limma	1.09549e-06	2.74966e-06	TRUE	hit	6.19561
925	NUFIP1	Q9UHK0	Nuclear fragile X mental retardation-interacting protein 1 OS=Homo sapiens GN=NUFIP1 PE=1 SV=2	1	4	3	3	5.92433	2.38755	20.5458	11.9176	1.10519e-06	2.76928e-06	6.13162	0.990636	1	1	WT - Control	limma	1.10519e-06	2.76928e-06	TRUE	hit	5.92433
926	PSMA3	P25788|P25788-2	Proteasome subunit alpha type-3 OS=Homo sapiens GN=PSMA3 PE=1 SV=2|Isoform 2 of Proteasome subunit alpha type-3 OS=Homo sapiens GN=PSMA3	1	4	3	3	7.14295	3.84026	22.6571	11.9168	1.10576e-06	2.76928e-06	6.13108	0.990636	1	1	WT - Control	limma	1.10576e-06	2.76928e-06	TRUE	hit	7.14295
927	DNAJA2	O60884	DnaJ homolog subfamily A member 2 OS=Homo sapiens GN=DNAJA2 PE=1 SV=1	1	4	3	6	7.06338	5.05345	23.1157	11.9112	1.11003e-06	2.77692e-06	6.12704	0.990641	1	1	WT - Control	limma	1.11003e-06	2.77692e-06	TRUE	hit	7.06338
928	HELLS	A0A0B4J1V9|Q9NRZ9|Q9NRZ9-2|Q9NRZ9-3|Q9NRZ9-5|Q9NRZ9-6	Helicase, lymphoid-specific, isoform CRA_b OS=Homo sapiens GN=HELLS PE=1 SV=1|Lymphoid-specific helicase OS=Homo sapiens GN=HELLS PE=1 SV=1|Isoform 2 of Lymphoid-specific helicase OS=Homo sapiens GN=HELLS|Isoform 3 of Lymphoid-specific helicase OS=Homo sapiens GN=HELLS|Isoform 5 of Lymphoid-specific helicase OS=Homo sapiens GN=HELLS|Isoform 6 of Lymphoid-specific helicase OS=Homo sapiens GN=HELLS	1	4	3	11	6.2791	3.2015	23.3707	11.9017	1.11738e-06	2.78914e-06	6.12014	0.990648	1	1	WT - Control	limma	1.11738e-06	2.78914e-06	TRUE	hit	6.2791
929	ESYT1	Q9BSJ8|Q9BSJ8-2	Extended synaptotagmin-1 OS=Homo sapiens GN=ESYT1 PE=1 SV=1|Isoform 2 of Extended synaptotagmin-1 OS=Homo sapiens GN=ESYT1	1	4	3	5	6.09502	2.24786	21.8538	11.8877	1.12831e-06	2.81331e-06	6.10995	0.990659	1	1	WT - Control	limma	1.12831e-06	2.81331e-06	TRUE	hit	6.09502
930	FIBP	O43427|O43427-2	Acidic fibroblast growth factor intracellular-binding protein OS=Homo sapiens GN=FIBP PE=1 SV=3|Isoform Short of Acidic fibroblast growth factor intracellular-binding protein OS=Homo sapiens GN=FIBP	1	4	3	2	5.4849	2.1209	20.0697	11.8795	1.13475e-06	2.82626e-06	6.10399	0.990666	1	1	WT - Control	limma	1.13475e-06	2.82626e-06	TRUE	hit	5.4849
931	WNK1	F5GWT4|Q9H4A3|Q9H4A3-2|Q9H4A3-5|Q9H4A3-6|Q9H4A3-7	Serine/threonine-protein kinase WNK1 OS=Homo sapiens GN=WNK1 PE=1 SV=1|Serine/threonine-protein kinase WNK1 OS=Homo sapiens GN=WNK1 PE=1 SV=2|Isoform 2 of Serine/threonine-protein kinase WNK1 OS=Homo sapiens GN=WNK1|Isoform 4 of Serine/threonine-protein kinase WNK1 OS=Homo sapiens GN=WNK1|Isoform 5 of Serine/threonine-protein kinase WNK1 OS=Homo sapiens GN=WNK1|Isoform 6 of Serine/threonine-prote…	1	4	3	5	5.8884	2.41965	20.6337	11.8662	1.14521e-06	2.84606e-06	6.09438	0.990676	1	1	WT - Control	limma	1.14521e-06	2.84606e-06	TRUE	hit	5.8884
932	MRPL24	Q96A35|X6RJ73	39S ribosomal protein L24, mitochondrial OS=Homo sapiens GN=MRPL24 PE=1 SV=1|39S ribosomal protein L24, mitochondrial (Fragment) OS=Homo sapiens GN=MRPL24 PE=1 SV=1	1	4	3	4	6.4858	2.35161	21.522	11.8635	1.14741e-06	2.84839e-06	6.09237	0.990678	1	1	WT - Control	limma	1.14741e-06	2.84839e-06	TRUE	hit	6.4858
933	FAM69A	A0A087WZ97|A0A087X2C2|Q5T7M9	Protein FAM69A OS=Homo sapiens GN=FAM69A PE=1 SV=1|Protein FAM69A OS=Homo sapiens GN=FAM69A PE=1 SV=1|Protein FAM69A OS=Homo sapiens GN=FAM69A PE=2 SV=1	1	4	3	3	5.86472	2.84784	21.159	11.8557	1.15362e-06	2.86066e-06	6.08672	0.990685	1	1	WT - Control	limma	1.15362e-06	2.86066e-06	TRUE	hit	5.86472
934	ASS1	P00966	Argininosuccinate synthase OS=Homo sapiens GN=ASS1 PE=1 SV=2	1	4	3	5	6.46851	2.12099	21.8492	11.8483	1.15954e-06	2.87221e-06	6.08136	0.99069	1	1	WT - Control	limma	1.15954e-06	2.87221e-06	TRUE	hit	6.46851
935	ECE1	B4DKB2|P42892|P42892-2|P42892-3|P42892-4	Endothelin-converting enzyme 1 OS=Homo sapiens GN=ECE1 PE=1 SV=1|Endothelin-converting enzyme 1 OS=Homo sapiens GN=ECE1 PE=1 SV=2|Isoform A of Endothelin-converting enzyme 1 OS=Homo sapiens GN=ECE1|Isoform C of Endothelin-converting enzyme 1 OS=Homo sapiens GN=ECE1|Isoform D of Endothelin-converting enzyme 1 OS=Homo sapiens GN=ECE1	1	4	3	2	5.87286	2.84736	20.9264	11.8244	3.29892e-06	6.80835e-06	5.19979	0.990709	1	1	WT - Control	limma	3.29892e-06	6.80835e-06	TRUE	hit	5.87286
936	AKAP8	O43823	A-kinase anchor protein 8 OS=Homo sapiens GN=AKAP8 PE=1 SV=1	1	4	3	5	6.41565	2.88283	21.5579	11.8186	1.18381e-06	2.92591e-06	6.05967	0.990714	1	1	WT - Control	limma	1.18381e-06	2.92591e-06	TRUE	hit	6.41565
937	CRMP1	E9PD68|Q14194|Q14194-2	Dihydropyrimidinase-related protein 1 OS=Homo sapiens GN=CRMP1 PE=1 SV=1|Dihydropyrimidinase-related protein 1 OS=Homo sapiens GN=CRMP1 PE=1 SV=1|Isoform LCRMP-1 of Dihydropyrimidinase-related protein 1 OS=Homo sapiens GN=CRMP1	1	4	3	5	5.91146	2.59368	21.4568	11.8159	1.18599e-06	2.92812e-06	6.05774	0.990716	1	1	WT - Control	limma	1.18599e-06	2.92812e-06	TRUE	hit	5.91146
938	ZNF45	Q02386	Zinc finger protein 45 OS=Homo sapiens GN=ZNF45 PE=2 SV=2	1	4	3	4	5.8547	2.93321	20.1216	11.7999	3.34948e-06	6.9001e-06	5.18404	0.990728	1	1	WT - Control	limma	3.34948e-06	6.9001e-06	TRUE	hit	5.8547
939	SGSM3	Q96HU1|Q96HU1-2	Small G protein signaling modulator 3 OS=Homo sapiens GN=SGSM3 PE=1 SV=1|Isoform 2 of Small G protein signaling modulator 3 OS=Homo sapiens GN=SGSM3	1	4	3	2	6.11806	3.19769	20.1631	11.7993	1.19984e-06	2.95908e-06	6.04558	0.990729	1	1	WT - Control	limma	1.19984e-06	2.95908e-06	TRUE	hit	6.11806
940	TMEM181	Q9P2C4	Transmembrane protein 181 OS=Homo sapiens GN=TMEM181 PE=1 SV=2	1	4	3	3	6.09121	3.76028	20.6871	11.7814	1.2149e-06	2.99298e-06	6.03251	0.990743	1	1	WT - Control	limma	1.2149e-06	2.99298e-06	TRUE	hit	6.09121
941	SEC13	P55735	Protein SEC13 homolog OS=Homo sapiens GN=SEC13 PE=1 SV=3	1	4	3	2	6.18032	3.00473	20.3524	11.7755	1.21994e-06	3.00212e-06	6.02817	0.990748	1	1	WT - Control	limma	1.21994e-06	3.00212e-06	TRUE	hit	6.18032
942	SPTLC1	O15269	Serine palmitoyltransferase 1 OS=Homo sapiens GN=SPTLC1 PE=1 SV=1	1	4	3	5	7.3007	2.46461	22.1581	11.7726	1.22237e-06	3.00484e-06	6.02608	0.99075	1	1	WT - Control	limma	1.22237e-06	3.00484e-06	TRUE	hit	7.3007
943	IKBKAP	O95163	Elongator complex protein 1 OS=Homo sapiens GN=IKBKAP PE=1 SV=3	1	4	3	9	6.43705	2.6397	22.6909	11.7629	1.23069e-06	3.022e-06	6.01898	0.990757	1	1	WT - Control	limma	1.23069e-06	3.022e-06	TRUE	hit	6.43705
944	PSMB5	P28074	Proteasome subunit beta type-5 OS=Homo sapiens GN=PSMB5 PE=1 SV=3	1	4	3	4	6.48967	2.19834	21.6044	11.7467	1.24478e-06	3.04659e-06	6.00705	0.99077	1	1	WT - Control	limma	1.24478e-06	3.04659e-06	TRUE	hit	6.48967
945	AFG3L2	Q9Y4W6	AFG3-like protein 2 OS=Homo sapiens GN=AFG3L2 PE=1 SV=2	1	4	3	12	6.93208	3.41196	23.0533	11.7464	1.24502e-06	3.04659e-06	6.00684	0.99077	1	1	WT - Control	limma	1.24502e-06	3.04659e-06	TRUE	hit	6.93208
946	ATP5G2	Q06055|Q06055-2|Q06055-3	ATP synthase F(0) complex subunit C2, mitochondrial OS=Homo sapiens GN=ATP5G2 PE=2 SV=1|Isoform 2 of ATP synthase F(0) complex subunit C2, mitochondrial OS=Homo sapiens GN=ATP5G2|Isoform 3 of ATP synthase F(0) complex subunit C2, mitochondrial OS=Homo sapiens GN=ATP5G2	1	4	3	2	6.6485	3.54281	21.4852	11.7463	1.2451e-06	3.04659e-06	6.00678	0.99077	1	1	WT - Control	limma	1.2451e-06	3.04659e-06	TRUE	hit	6.6485
947	DAAM1	Q9Y4D1|Q9Y4D1-2	Disheveled-associated activator of morphogenesis 1 OS=Homo sapiens GN=DAAM1 PE=1 SV=2|Isoform 2 of Disheveled-associated activator of morphogenesis 1 OS=Homo sapiens GN=DAAM1	1	4	3	4	5.93608	2.30529	20.2755	11.7452	1.24609e-06	3.04659e-06	6.00595	0.990771	1	1	WT - Control	limma	1.24609e-06	3.04659e-06	TRUE	hit	5.93608
948	CNOT8	E5RIL2|Q9UFF9|Q9UFF9-3	CCR4-NOT transcription complex subunit 8 (Fragment) OS=Homo sapiens GN=CNOT8 PE=1 SV=1|CCR4-NOT transcription complex subunit 8 OS=Homo sapiens GN=CNOT8 PE=1 SV=1|Isoform 3 of CCR4-NOT transcription complex subunit 8 OS=Homo sapiens GN=CNOT8	1	4	3	2	6.03242	2.48668	20.7846	11.7323	1.25737e-06	3.07085e-06	5.99651	0.990781	1	1	WT - Control	limma	1.25737e-06	3.07085e-06	TRUE	hit	6.03242
949	HAT1	O14929|O14929-2	Histone acetyltransferase type B catalytic subunit OS=Homo sapiens GN=HAT1 PE=1 SV=1|Isoform B of Histone acetyltransferase type B catalytic subunit OS=Homo sapiens GN=HAT1	1	4	3	2	6.27185	2.63267	21.0064	11.7187	1.26947e-06	3.09706e-06	5.98647	0.990792	1	1	WT - Control	limma	1.26947e-06	3.09706e-06	TRUE	hit	6.27185
950	VAC14	Q08AM6	Protein VAC14 homolog OS=Homo sapiens GN=VAC14 PE=1 SV=1	1	4	3	4	5.75677	2.64971	21.1243	11.7129	1.27458e-06	3.1062e-06	5.98225	0.990797	1	1	WT - Control	limma	1.27458e-06	3.1062e-06	TRUE	hit	5.75677
951	TONSL	Q96HA7|Q96HA7-2	Tonsoku-like protein OS=Homo sapiens GN=TONSL PE=1 SV=2|Isoform 2 of Tonsoku-like protein OS=Homo sapiens GN=TONSL	1	4	3	3	5.78949	2.45194	20.0728	11.7095	1.27769e-06	3.11043e-06	5.97969	0.990799	1	1	WT - Control	limma	1.27769e-06	3.11043e-06	TRUE	hit	5.78949
952	NAP1L1	B7Z9C2|F8VV59|F8W118|P55209-3	Nucleosome assembly protein 1-like 1 OS=Homo sapiens GN=NAP1L1 PE=1 SV=1|Nucleosome assembly protein 1-like 1 OS=Homo sapiens GN=NAP1L1 PE=1 SV=1|Nucleosome assembly protein 1-like 1 (Fragment) OS=Homo sapiens GN=NAP1L1 PE=1 SV=1|Isoform 3 of Nucleosome assembly protein 1-like 1 OS=Homo sapiens GN=NAP1L1	1	4	3	3	6.63973	3.72446	21.9348	11.6976	1.28842e-06	3.13131e-06	5.97093	0.990809	1	1	WT - Control	limma	1.28842e-06	3.13131e-06	TRUE	hit	6.63973
953	SCAMP3	O14828	Secretory carrier-associated membrane protein 3 OS=Homo sapiens GN=SCAMP3 PE=1 SV=3	1	4	3	8	6.60761	4.38878	22.0343	11.696	1.28986e-06	3.13131e-06	5.96976	0.99081	1	1	WT - Control	limma	1.28986e-06	3.13131e-06	TRUE	hit	6.60761
954	SFXN3	A0A0A0MS41|Q9BWM7	Sideroflexin OS=Homo sapiens GN=SFXN3 PE=1 SV=1|Sideroflexin-3 OS=Homo sapiens GN=SFXN3 PE=1 SV=2	1	4	3	3	6.0021	3.08644	20.6929	11.6954	1.29042e-06	3.13131e-06	5.9693	0.99081	1	1	WT - Control	limma	1.29042e-06	3.13131e-06	TRUE	hit	6.0021
955	PIGU	Q9H490|Q9H490-2	Phosphatidylinositol glycan anchor biosynthesis class U protein OS=Homo sapiens GN=PIGU PE=1 SV=3|Isoform 2 of Phosphatidylinositol glycan anchor biosynthesis class U protein OS=Homo sapiens GN=PIGU	1	4	3	2	5.73636	2.41627	19.843	11.6654	3.64303e-06	7.37731e-06	5.09697	0.990834	1	1	WT - Control	limma	3.64303e-06	7.37731e-06	TRUE	hit	5.73636
956	TBC1D2B	Q9UPU7	TBC1 domain family member 2B OS=Homo sapiens GN=TBC1D2B PE=1 SV=2	1	4	3	3	6.07345	2.98491	21.1763	11.6463	1.33584e-06	3.23114e-06	5.93303	0.990849	1	1	WT - Control	limma	1.33584e-06	3.23114e-06	TRUE	hit	6.07345
957	AARS2	Q5JTZ9	Alanine--tRNA ligase, mitochondrial OS=Homo sapiens GN=AARS2 PE=1 SV=1	1	4	3	4	6.12908	3.76601	21.3103	11.644	1.33797e-06	3.23282e-06	5.93136	0.990851	1	1	WT - Control	limma	1.33797e-06	3.23282e-06	TRUE	hit	6.12908
958	SLC35E2B	P0CK96	Solute carrier family 35 member E2B OS=Homo sapiens GN=SLC35E2B PE=2 SV=1	1	4	3	2	6.15531	2.73782	21.7809	11.6307	1.35065e-06	3.25998e-06	5.92147	0.990861	1	1	WT - Control	limma	1.35065e-06	3.25998e-06	TRUE	hit	6.15531
959	DGKE	I3L112|P52429	Diacylglycerol kinase (Fragment) OS=Homo sapiens GN=DGKE PE=1 SV=1|Diacylglycerol kinase epsilon OS=Homo sapiens GN=DGKE PE=1 SV=1	1	4	3	6	6.50183	4.54671	22.1274	11.611	1.36952e-06	3.30202e-06	5.90691	0.990877	1	1	WT - Control	limma	1.36952e-06	3.30202e-06	TRUE	hit	6.50183
960	SNRNP200	O75643	U5 small nuclear ribonucleoprotein 200 kDa helicase OS=Homo sapiens GN=SNRNP200 PE=1 SV=2	1	4	3	29	6.91481	2.19286	25.0253	11.6002	1.38009e-06	3.32395e-06	5.89885	0.990885	1	1	WT - Control	limma	1.38009e-06	3.32395e-06	TRUE	hit	6.91481
961	WDR59	Q6PJI9|Q6PJI9-3	WD repeat-containing protein 59 OS=Homo sapiens GN=WDR59 PE=1 SV=2|Isoform 3 of WD repeat-containing protein 59 OS=Homo sapiens GN=WDR59	1	4	3	4	6.11099	3.00343	21.179	11.5895	1.39059e-06	3.3457e-06	5.89089	0.990894	1	1	WT - Control	limma	1.39059e-06	3.3457e-06	TRUE	hit	6.11099
962	ASCC2	Q9H1I8	Activating signal cointegrator 1 complex subunit 2 OS=Homo sapiens GN=ASCC2 PE=1 SV=3	1	4	3	4	5.80831	2.37704	20.4126	11.5879	1.39217e-06	3.34595e-06	5.8897	0.990895	1	1	WT - Control	limma	1.39217e-06	3.34595e-06	TRUE	hit	5.80831
963	KIAA0391	O15091	Mitochondrial ribonuclease P protein 3 OS=Homo sapiens GN=KIAA0391 PE=1 SV=2	1	4	3	3	6.20948	2.24481	21.3608	11.5738	1.40615e-06	3.37594e-06	5.87922	0.990906	1	1	WT - Control	limma	1.40615e-06	3.37594e-06	TRUE	hit	6.20948
964	TMEM132E	A0A0J9YW40	Transmembrane protein 132E OS=Homo sapiens GN=TMEM132E PE=1 SV=1	1	4	3	5	6.17016	2.81971	20.5387	11.5727	3.86244e-06	7.73171e-06	5.03628	0.990907	1	1	WT - Control	limma	3.86244e-06	7.73171e-06	TRUE	hit	6.17016
965	SLC25A25	Q6KCM7-2|Q6KCM7-3	Isoform 2 of Calcium-binding mitochondrial carrier protein SCaMC-2 OS=Homo sapiens GN=SLC25A25|Isoform 3 of Calcium-binding mitochondrial carrier protein SCaMC-2 OS=Homo sapiens GN=SLC25A25	1	4	3	4	6.01334	2.69911	20.5524	11.568	1.41199e-06	3.38202e-06	5.87486	0.990911	1	1	WT - Control	limma	1.41199e-06	3.38202e-06	TRUE	hit	6.01334
966	CCT3	P49368	T-complex protein 1 subunit gamma OS=Homo sapiens GN=CCT3 PE=1 SV=4	1	4	3	15	7.29413	2.33321	24.0624	11.5668	1.41316e-06	3.38202e-06	5.874	0.990912	1	1	WT - Control	limma	1.41316e-06	3.38202e-06	TRUE	hit	7.29413
967	CHD1L	A0A0A0MSH9|Q86WJ1|Q86WJ1-2|Q86WJ1-4	Chromodomain-helicase-DNA-binding protein 1-like OS=Homo sapiens GN=CHD1L PE=1 SV=1|Chromodomain-helicase-DNA-binding protein 1-like OS=Homo sapiens GN=CHD1L PE=1 SV=2|Isoform 2 of Chromodomain-helicase-DNA-binding protein 1-like OS=Homo sapiens GN=CHD1L|Isoform 4 of Chromodomain-helicase-DNA-binding protein 1-like OS=Homo sapiens GN=CHD1L	1	4	3	4	5.68539	2.7012	21.3018	11.5562	1.42382e-06	3.40034e-06	5.86611	0.99092	1	1	WT - Control	limma	1.42382e-06	3.40034e-06	TRUE	hit	5.68539
968	MIS18A	Q9NYP9	Protein Mis18-alpha OS=Homo sapiens GN=MIS18A PE=1 SV=1	1	4	3	3	5.61306	2.57375	20.2415	11.5481	1.43211e-06	3.41653e-06	5.86002	0.990926	1	1	WT - Control	limma	1.43211e-06	3.41653e-06	TRUE	hit	5.61306
969	IFT172	Q9UG01	Intraflagellar transport protein 172 homolog OS=Homo sapiens GN=IFT172 PE=1 SV=2	1	4	3	4	5.96533	2.70664	21.2897	11.536	1.44449e-06	3.44244e-06	5.85099	0.990936	1	1	WT - Control	limma	1.44449e-06	3.44244e-06	TRUE	hit	5.96533
970	TOP2A	P11388|P11388-2|P11388-3|P11388-4	DNA topoisomerase 2-alpha OS=Homo sapiens GN=TOP2A PE=1 SV=3|Isoform 2 of DNA topoisomerase 2-alpha OS=Homo sapiens GN=TOP2A|Isoform 3 of DNA topoisomerase 2-alpha OS=Homo sapiens GN=TOP2A|Isoform 4 of DNA topoisomerase 2-alpha OS=Homo sapiens GN=TOP2A	1	4	3	5	5.89528	2.59594	21.0344	11.5147	1.46659e-06	3.49143e-06	5.83505	0.990952	1	1	WT - Control	limma	1.46659e-06	3.49143e-06	TRUE	hit	5.89528
971	EGFL7	Q9UHF1	Epidermal growth factor-like protein 7 OS=Homo sapiens GN=EGFL7 PE=1 SV=3	1	4	3	2	6.09045	2.49614	20.0469	11.5024	1.4795e-06	3.51848e-06	5.82584	0.990962	1	1	WT - Control	limma	1.4795e-06	3.51848e-06	TRUE	hit	6.09045
972	NSDHL	Q15738	Sterol-4-alpha-carboxylate 3-dehydrogenase, decarboxylating OS=Homo sapiens GN=NSDHL PE=1 SV=2	1	4	3	4	6.27892	2.73214	21.4457	11.4962	1.48608e-06	3.53042e-06	5.82118	0.990967	1	1	WT - Control	limma	1.48608e-06	3.53042e-06	TRUE	hit	6.27892
973	RTCB	Q9Y3I0	tRNA-splicing ligase RtcB homolog OS=Homo sapiens GN=RTCB PE=1 SV=1	1	4	3	5	6.50781	2.33529	22.5001	11.4925	1.49001e-06	3.53604e-06	5.81841	0.99097	1	1	WT - Control	limma	1.49001e-06	3.53604e-06	TRUE	hit	6.50781
974	ARV1	A0A0A0MRI7|H7C484|Q9H2C2	Protein ARV1 OS=Homo sapiens GN=ARV1 PE=1 SV=1|Protein ARV1 (Fragment) OS=Homo sapiens GN=ARV1 PE=1 SV=1|Protein ARV1 OS=Homo sapiens GN=ARV1 PE=2 SV=1	1	4	3	3	6.22988	5.08026	21.9722	11.4738	1.50999e-06	3.57596e-06	5.80442	0.990985	1	1	WT - Control	limma	1.50999e-06	3.57596e-06	TRUE	hit	6.22988
975	LARS	Q9P2J5|Q9P2J5-2	Leucine--tRNA ligase, cytoplasmic OS=Homo sapiens GN=LARS PE=1 SV=2|Isoform 2 of Leucine--tRNA ligase, cytoplasmic OS=Homo sapiens GN=LARS	1	4	3	17	6.80011	2.24337	23.7901	11.4651	1.51948e-06	3.59387e-06	5.79784	0.990991	1	1	WT - Control	limma	1.51948e-06	3.59387e-06	TRUE	hit	6.80011
976	SNX18	Q96RF0|Q96RF0-2|Q96RF0-3	Sorting nexin-18 OS=Homo sapiens GN=SNX18 PE=1 SV=2|Isoform 2 of Sorting nexin-18 OS=Homo sapiens GN=SNX18|Isoform 3 of Sorting nexin-18 OS=Homo sapiens GN=SNX18	1	4	3	3	5.83095	2.29973	19.9092	11.4532	1.53245e-06	3.61605e-06	5.78891	0.991001	1	1	WT - Control	limma	1.53245e-06	3.61605e-06	TRUE	hit	5.83095
977	NUDC	Q9Y266	Nuclear migration protein nudC OS=Homo sapiens GN=NUDC PE=1 SV=1	1	4	3	5	6.36192	2.47384	22.4215	11.4343	1.55333e-06	3.65565e-06	5.7747	0.991016	1	1	WT - Control	limma	1.55333e-06	3.65565e-06	TRUE	hit	6.36192
978	TSEN54	Q7Z6J9	tRNA-splicing endonuclease subunit Sen54 OS=Homo sapiens GN=TSEN54 PE=1 SV=3	1	4	3	4	6.31104	2.86128	20.8993	11.4312	1.55679e-06	3.65622e-06	5.77236	0.991018	1	1	WT - Control	limma	1.55679e-06	3.65622e-06	TRUE	hit	6.31104
979	CHD4	A0A0C4DGG9|F5GWX5|Q14839|Q14839-2	Chromodomain-helicase-DNA-binding protein 4 OS=Homo sapiens GN=CHD4 PE=1 SV=1|Chromodomain-helicase-DNA-binding protein 4 OS=Homo sapiens GN=CHD4 PE=1 SV=1|Chromodomain-helicase-DNA-binding protein 4 OS=Homo sapiens GN=CHD4 PE=1 SV=2|Isoform 2 of Chromodomain-helicase-DNA-binding protein 4 OS=Homo sapiens GN=CHD4	1	4	3	11	6.53823	1.96758	23.1242	11.4312	1.5568e-06	3.65622e-06	5.77235	0.991018	1	1	WT - Control	limma	1.5568e-06	3.65622e-06	TRUE	hit	6.53823
980	PTDSS2	Q9BVG9	Phosphatidylserine synthase 2 OS=Homo sapiens GN=PTDSS2 PE=1 SV=1	1	4	3	2	6.24576	3.29763	20.1546	11.4279	1.56046e-06	3.66101e-06	5.76989	0.991021	1	1	WT - Control	limma	1.56046e-06	3.66101e-06	TRUE	hit	6.24576
981	RFC4	P35249	Replication factor C subunit 4 OS=Homo sapiens GN=RFC4 PE=1 SV=2	1	4	3	2	5.81152	2.10719	21.3681	11.4003	1.59173e-06	3.7305e-06	5.74905	0.991042	1	1	WT - Control	limma	1.59173e-06	3.7305e-06	TRUE	hit	5.81152
982	MAGT1	A0A087WU53|Q9H0U3	Magnesium transporter protein 1 OS=Homo sapiens GN=MAGT1 PE=1 SV=1|Magnesium transporter protein 1 OS=Homo sapiens GN=MAGT1 PE=1 SV=1	1	4	3	4	6.67231	4.77618	22.4317	11.3946	1.59831e-06	3.74206e-06	5.74471	0.991047	1	1	WT - Control	limma	1.59831e-06	3.74206e-06	TRUE	hit	6.67231
983	VPS13C	Q709C8|Q709C8-2|Q709C8-3|Q709C8-4	Vacuolar protein sorting-associated protein 13C OS=Homo sapiens GN=VPS13C PE=1 SV=1|Isoform 2 of Vacuolar protein sorting-associated protein 13C OS=Homo sapiens GN=VPS13C|Isoform 3 of Vacuolar protein sorting-associated protein 13C OS=Homo sapiens GN=VPS13C|Isoform 4 of Vacuolar protein sorting-associated protein 13C OS=Homo sapiens GN=VPS13C	1	4	3	9	5.88118	3.20541	21.1969	11.3916	1.60173e-06	3.7462e-06	5.74246	0.991049	1	1	WT - Control	limma	1.60173e-06	3.7462e-06	TRUE	hit	5.88118
984	NOP56	O00567	Nucleolar protein 56 OS=Homo sapiens GN=NOP56 PE=1 SV=4	1	4	3	12	7.0063	3.51055	23.5748	11.382	1.61287e-06	3.76836e-06	5.73518	0.991057	1	1	WT - Control	limma	1.61287e-06	3.76836e-06	TRUE	hit	7.0063
985	CPT2	P23786	Carnitine O-palmitoyltransferase 2, mitochondrial OS=Homo sapiens GN=CPT2 PE=1 SV=2	1	4	3	2	5.76581	2.72224	20.4191	11.3763	4.37753e-06	8.60306e-06	4.90616	0.991061	1	1	WT - Control	limma	4.37753e-06	8.60306e-06	TRUE	hit	5.76581
986	COIL	P38432	Coilin OS=Homo sapiens GN=COIL PE=1 SV=1	1	4	3	4	6.23684	2.43951	21.112	11.3734	1.62287e-06	3.7878e-06	5.72868	0.991063	1	1	WT - Control	limma	1.62287e-06	3.7878e-06	TRUE	hit	6.23684
987	MANF	A8K878|P55145	Mesencephalic astrocyte-derived neurotrophic factor OS=Homo sapiens GN=MANF PE=1 SV=1|Mesencephalic astrocyte-derived neurotrophic factor OS=Homo sapiens GN=MANF PE=1 SV=3	1	4	3	2	5.65501	2.45551	20.111	11.3443	1.6573e-06	3.86418e-06	5.70662	0.991086	1	1	WT - Control	limma	1.6573e-06	3.86418e-06	TRUE	hit	5.65501
988	RBBP4	Q09028|Q09028-2|Q09028-3	Histone-binding protein RBBP4 OS=Homo sapiens GN=RBBP4 PE=1 SV=3|Isoform 2 of Histone-binding protein RBBP4 OS=Homo sapiens GN=RBBP4|Isoform 3 of Histone-binding protein RBBP4 OS=Homo sapiens GN=RBBP4	1	4	3	2	6.70288	2.4415	22.1276	11.3358	1.66758e-06	3.88415e-06	5.70012	0.991093	1	1	WT - Control	limma	1.66758e-06	3.88415e-06	TRUE	hit	6.70288
989	SAV1	H0YJH0|Q9H4B6	Protein salvador homolog 1 (Fragment) OS=Homo sapiens GN=SAV1 PE=1 SV=1|Protein salvador homolog 1 OS=Homo sapiens GN=SAV1 PE=1 SV=2	1	4	3	2	5.84566	2.62316	20.2647	11.3275	1.6776e-06	3.90347e-06	5.69382	0.9911	1	1	WT - Control	limma	1.6776e-06	3.90347e-06	TRUE	hit	5.84566
990	L2HGDH	C9JVN9|G3V272|Q9H9P8|Q9H9P8-2	L-2-hydroxyglutarate dehydrogenase, mitochondrial OS=Homo sapiens GN=L2HGDH PE=1 SV=1|L-2-hydroxyglutarate dehydrogenase, mitochondrial OS=Homo sapiens GN=L2HGDH PE=1 SV=1|L-2-hydroxyglutarate dehydrogenase, mitochondrial OS=Homo sapiens GN=L2HGDH PE=1 SV=3|Isoform 2 of L-2-hydroxyglutarate dehydrogenase, mitochondrial OS=Homo sapiens GN=L2HGDH	1	4	3	2	6.12726	2.36122	20.1686	11.3175	1.68984e-06	3.92792e-06	5.68618	0.991107	1	1	WT - Control	limma	1.68984e-06	3.92792e-06	TRUE	hit	6.12726
991	NID2	Q14112|Q14112-2	Nidogen-2 OS=Homo sapiens GN=NID2 PE=1 SV=3|Isoform 2 of Nidogen-2 OS=Homo sapiens GN=NID2	1	4	3	3	5.7103	3.53356	20.3467	11.3133	1.69492e-06	3.93569e-06	5.68302	0.991111	1	1	WT - Control	limma	1.69492e-06	3.93569e-06	TRUE	hit	5.7103
992	GTF3C2	Q8WUA4	General transcription factor 3C polypeptide 2 OS=Homo sapiens GN=GTF3C2 PE=1 SV=2	1	4	3	3	6.23974	2.23539	20.6646	11.3117	1.69694e-06	3.93635e-06	5.68176	0.991112	1	1	WT - Control	limma	1.69694e-06	3.93635e-06	TRUE	hit	6.23974
993	PDHX	O00330|O00330-3	Pyruvate dehydrogenase protein X component, mitochondrial OS=Homo sapiens GN=PDHX PE=1 SV=3|Isoform 3 of Pyruvate dehydrogenase protein X component, mitochondrial OS=Homo sapiens GN=PDHX	1	4	3	4	5.59634	2.73834	20.5487	11.3083	1.70107e-06	3.94187e-06	5.67921	0.991115	1	1	WT - Control	limma	1.70107e-06	3.94187e-06	TRUE	hit	5.59634
994	SLC25A33	Q9BSK2	Solute carrier family 25 member 33 OS=Homo sapiens GN=SLC25A33 PE=1 SV=1	1	4	3	3	6.39868	4.42043	21.2649	11.3001	1.71122e-06	3.96135e-06	5.67296	0.991121	1	1	WT - Control	limma	1.71122e-06	3.96135e-06	TRUE	hit	6.39868
995	VPRBP	Q9Y4B6|Q9Y4B6-2	Protein VPRBP OS=Homo sapiens GN=VPRBP PE=1 SV=3|Isoform 2 of Protein VPRBP OS=Homo sapiens GN=VPRBP	1	4	3	3	5.72441	2.60592	20.2921	11.2937	4.61672e-06	8.9642e-06	4.85077	0.991126	1	1	WT - Control	limma	4.61672e-06	8.9642e-06	TRUE	hit	5.72441
996	CDC123	O75794|X6RF82	Cell division cycle protein 123 homolog OS=Homo sapiens GN=CDC123 PE=1 SV=1|Cell division cycle protein 123 homolog (Fragment) OS=Homo sapiens GN=CDC123 PE=1 SV=1	1	4	3	2	5.9863	2.33479	20.0351	11.2914	1.72207e-06	3.98199e-06	5.66631	0.991128	1	1	WT - Control	limma	1.72207e-06	3.98199e-06	TRUE	hit	5.9863
997	WDR18	A0A0A0MQU0|Q9BV38|U3KQC1	WD repeat-containing protein 18 (Fragment) OS=Homo sapiens GN=WDR18 PE=1 SV=1|WD repeat-containing protein 18 OS=Homo sapiens GN=WDR18 PE=1 SV=2|WD repeat-containing protein 18 (Fragment) OS=Homo sapiens GN=WDR18 PE=1 SV=1	1	4	3	3	6.52588	2.18119	20.5509	11.2888	1.72527e-06	3.98199e-06	5.66436	0.99113	1	1	WT - Control	limma	1.72527e-06	3.98199e-06	TRUE	hit	6.52588
998	FRYL	O94915	Protein furry homolog-like OS=Homo sapiens GN=FRYL PE=1 SV=2	1	4	3	2	5.73855	2.41278	19.4946	11.2887	1.72541e-06	3.98199e-06	5.66427	0.99113	1	1	WT - Control	limma	1.72541e-06	3.98199e-06	TRUE	hit	5.73855
999	ARF3|ARF1	P61204|P84077	ADP-ribosylation factor 3 OS=Homo sapiens GN=ARF3 PE=1 SV=2|ADP-ribosylation factor 1 OS=Homo sapiens GN=ARF1 PE=1 SV=2	1	4	3	2	6.78255	2.21524	21.0786	11.2732	1.74501e-06	4.02263e-06	5.65239	0.991142	1	1	WT - Control	limma	1.74501e-06	4.02263e-06	TRUE	hit	6.78255
1000	TUBB6	Q9BUF5	Tubulin beta-6 chain OS=Homo sapiens GN=TUBB6 PE=1 SV=1	1	4	3	3	7.07918	3.86945	20.8975	11.2719	1.74658e-06	4.02263e-06	5.65145	0.991143	1	1	WT - Control	limma	1.74658e-06	4.02263e-06	TRUE	hit	7.07918
1001	CNOT1	A5YKK6|A5YKK6-2	CCR4-NOT transcription complex subunit 1 OS=Homo sapiens GN=CNOT1 PE=1 SV=2|Isoform 2 of CCR4-NOT transcription complex subunit 1 OS=Homo sapiens GN=CNOT1	1	4	3	12	6.24201	2.65372	22.5635	11.2595	1.76246e-06	4.05509e-06	5.64193	0.991153	1	1	WT - Control	limma	1.76246e-06	4.05509e-06	TRUE	hit	6.24201
1002	SEC31A	D6REX3|O94979|O94979-2|O94979-3|O94979-8|O94979-9	Protein transport protein Sec31A OS=Homo sapiens GN=SEC31A PE=1 SV=1|Protein transport protein Sec31A OS=Homo sapiens GN=SEC31A PE=1 SV=3|Isoform 2 of Protein transport protein Sec31A OS=Homo sapiens GN=SEC31A|Isoform 3 of Protein transport protein Sec31A OS=Homo sapiens GN=SEC31A|Isoform 8 of Protein transport protein Sec31A OS=Homo sapiens GN=SEC31A|Isoform 9 of Protein transport protein Sec31A…	1	4	3	5	5.96994	2.50485	21.7295	11.2371	1.79143e-06	4.11756e-06	5.62478	0.991171	1	1	WT - Control	limma	1.79143e-06	4.11756e-06	TRUE	hit	5.96994
1003	PLEKHG2	C9JVL3|E7ESZ3|H7BXC7|Q9H7P9|Q9H7P9-3	Pleckstrin homology domain-containing family G member 2 (Fragment) OS=Homo sapiens GN=PLEKHG2 PE=1 SV=1|Pleckstrin homology domain-containing family G member 2 OS=Homo sapiens GN=PLEKHG2 PE=1 SV=2|Pleckstrin homology domain-containing family G member 2 (Fragment) OS=Homo sapiens GN=PLEKHG2 PE=1 SV=1|Pleckstrin homology domain-containing family G member 2 OS=Homo sapiens GN=PLEKHG2 PE=1 SV=3|Isofo…	1	4	3	2	5.6245	2.92465	20.1168	11.2343	1.79513e-06	4.12187e-06	5.62261	0.991173	1	1	WT - Control	limma	1.79513e-06	4.12187e-06	TRUE	hit	5.6245
1004	ATP5B	P06576	ATP synthase subunit beta, mitochondrial OS=Homo sapiens GN=ATP5B PE=1 SV=3	1	4	3	9	7.26763	2.60575	23.6763	11.2277	1.80378e-06	4.13755e-06	5.61755	0.991178	1	1	WT - Control	limma	1.80378e-06	4.13755e-06	TRUE	hit	7.26763
1005	ACTR1A	P61163|R4GMT0	Alpha-centractin OS=Homo sapiens GN=ACTR1A PE=1 SV=1|Alpha-centractin OS=Homo sapiens GN=ACTR1A PE=1 SV=1	1	4	3	4	6.60857	2.31539	21.5389	11.2097	1.8276e-06	4.18794e-06	5.60374	0.991192	1	1	WT - Control	limma	1.8276e-06	4.18794e-06	TRUE	hit	6.60857
1006	POLD3	Q15054	DNA polymerase delta subunit 3 OS=Homo sapiens GN=POLD3 PE=1 SV=2	1	4	3	5	6.20546	4.53925	21.9988	11.2057	1.83293e-06	4.19408e-06	5.60068	0.991195	1	1	WT - Control	limma	1.83293e-06	4.19408e-06	TRUE	hit	6.20546
1007	AP1G2	O75843	AP-1 complex subunit gamma-like 2 OS=Homo sapiens GN=AP1G2 PE=1 SV=1	1	4	3	2	6.02098	2.38652	19.5852	11.2049	1.83398e-06	4.19408e-06	5.60007	0.991196	1	1	WT - Control	limma	1.83398e-06	4.19408e-06	TRUE	hit	6.02098
1008	UHRF1BP1	Q6BDS2	UHRF1-binding protein 1 OS=Homo sapiens GN=UHRF1BP1 PE=1 SV=1	1	4	3	2	5.57742	2.64119	21.1024	11.1995	4.90792e-06	9.42454e-06	4.78703	0.9912	1	1	WT - Control	limma	4.90792e-06	9.42454e-06	TRUE	hit	5.57742
1009	PUS1	F5H1S9|G8JLB3|Q9Y606|Q9Y606-2	tRNA pseudouridine synthase OS=Homo sapiens GN=PUS1 PE=1 SV=1|tRNA pseudouridine synthase (Fragment) OS=Homo sapiens GN=PUS1 PE=1 SV=1|tRNA pseudouridine synthase A, mitochondrial OS=Homo sapiens GN=PUS1 PE=1 SV=3|Isoform 2 of tRNA pseudouridine synthase A, mitochondrial OS=Homo sapiens GN=PUS1	1	4	3	6	6.24068	2.51416	22.2033	11.1991	1.84183e-06	4.20777e-06	5.59558	0.9912	1	1	WT - Control	limma	1.84183e-06	4.20777e-06	TRUE	hit	6.24068
1010	SIRT1	B0QZ35|E9PC49|Q96EB6	NAD-dependent protein deacetylase sirtuin-1 OS=Homo sapiens GN=SIRT1 PE=1 SV=1|NAD-dependent protein deacetylase sirtuin-1 OS=Homo sapiens GN=SIRT1 PE=1 SV=1|NAD-dependent protein deacetylase sirtuin-1 OS=Homo sapiens GN=SIRT1 PE=1 SV=2	1	4	3	2	5.66965	2.51764	20.3918	11.1969	1.84477e-06	4.21024e-06	5.59391	0.991202	1	1	WT - Control	limma	1.84477e-06	4.21024e-06	TRUE	hit	5.66965
1011	BPTF	E7ETD6|F5GXF5|Q12830|Q12830-2|Q12830-4	Nucleosome-remodeling factor subunit BPTF (Fragment) OS=Homo sapiens GN=BPTF PE=1 SV=3|Nucleosome-remodeling factor subunit BPTF (Fragment) OS=Homo sapiens GN=BPTF PE=1 SV=2|Nucleosome-remodeling factor subunit BPTF OS=Homo sapiens GN=BPTF PE=1 SV=3|Isoform 2 of Nucleosome-remodeling factor subunit BPTF OS=Homo sapiens GN=BPTF|Isoform 4 of Nucleosome-remodeling factor subunit BPTF OS=Homo sapiens…	1	4	3	3	5.84867	2.29074	20.07	11.1948	1.84758e-06	4.2124e-06	5.5923	0.991204	1	1	WT - Control	limma	1.84758e-06	4.2124e-06	TRUE	hit	5.84867
1012	GALK1	P51570|P51570-2	Galactokinase OS=Homo sapiens GN=GALK1 PE=1 SV=1|Isoform 2 of Galactokinase OS=Homo sapiens GN=GALK1	1	4	3	8	6.88205	3.54455	22.4128	11.1917	1.85177e-06	4.21772e-06	5.58992	0.991206	1	1	WT - Control	limma	1.85177e-06	4.21772e-06	TRUE	hit	6.88205
1013	VPS45	A0A087WU65|Q9NRW7	Vacuolar protein sorting-associated protein 45 OS=Homo sapiens GN=VPS45 PE=1 SV=1|Vacuolar protein sorting-associated protein 45 OS=Homo sapiens GN=VPS45 PE=1 SV=1	1	4	3	2	5.92364	2.20993	20.7405	11.1852	1.86059e-06	4.23354e-06	5.58492	0.991211	1	1	WT - Control	limma	1.86059e-06	4.23354e-06	TRUE	hit	5.92364
1014	CHAF1B	Q13112	Chromatin assembly factor 1 subunit B OS=Homo sapiens GN=CHAF1B PE=1 SV=1	1	4	3	2	5.84254	1.98621	20.2325	11.1758	1.87343e-06	4.25849e-06	5.57768	0.991219	1	1	WT - Control	limma	1.87343e-06	4.25849e-06	TRUE	hit	5.84254
1015	EXOC5	A0A0A0MSI8|O00471	Exocyst complex component 5 OS=Homo sapiens GN=EXOC5 PE=1 SV=1|Exocyst complex component 5 OS=Homo sapiens GN=EXOC5 PE=1 SV=1	1	4	3	7	6.27558	2.96619	22.1008	11.1688	1.88315e-06	4.27628e-06	5.57223	0.991224	1	1	WT - Control	limma	1.88315e-06	4.27628e-06	TRUE	hit	6.27558
1016	SERPINH1	P50454	Serpin H1 OS=Homo sapiens GN=SERPINH1 PE=1 SV=2	1	4	3	8	6.80479	2.07902	22.6712	11.1611	1.89377e-06	4.29179e-06	5.56631	0.99123	1	1	WT - Control	limma	1.89377e-06	4.29179e-06	TRUE	hit	6.80479
1017	ECH1	M0R248|Q13011	Delta(3,5)-Delta(2,4)-dienoyl-CoA isomerase, mitochondrial (Fragment) OS=Homo sapiens GN=ECH1 PE=1 SV=1|Delta(3,5)-Delta(2,4)-dienoyl-CoA isomerase, mitochondrial OS=Homo sapiens GN=ECH1 PE=1 SV=2	1	4	3	2	6.00177	2.37656	20.4615	11.1349	1.93053e-06	4.37071e-06	5.54608	0.991251	1	1	WT - Control	limma	1.93053e-06	4.37071e-06	TRUE	hit	6.00177
1018	PCID2	Q5JVF3|Q5JVF3-2|Q5JVF3-3|Q5JVF3-4	PCI domain-containing protein 2 OS=Homo sapiens GN=PCID2 PE=1 SV=2|Isoform 2 of PCI domain-containing protein 2 OS=Homo sapiens GN=PCID2|Isoform 3 of PCI domain-containing protein 2 OS=Homo sapiens GN=PCID2|Isoform 4 of PCI domain-containing protein 2 OS=Homo sapiens GN=PCID2	1	4	3	7	6.74234	4.72437	22.3756	11.1203	1.95139e-06	4.40913e-06	5.53476	0.991262	1	1	WT - Control	limma	1.95139e-06	4.40913e-06	TRUE	hit	6.74234
1019	MTUS1	Q9ULD2|Q9ULD2-2	Microtubule-associated tumor suppressor 1 OS=Homo sapiens GN=MTUS1 PE=1 SV=2|Isoform 2 of Microtubule-associated tumor suppressor 1 OS=Homo sapiens GN=MTUS1	1	4	3	3	5.47263	2.47774	20.3359	11.117	1.95609e-06	4.41534e-06	5.53223	0.991265	1	1	WT - Control	limma	1.95609e-06	4.41534e-06	TRUE	hit	5.47263
1020	SLC20A1	Q8WUM9	Sodium-dependent phosphate transporter 1 OS=Homo sapiens GN=SLC20A1 PE=1 SV=1	1	4	3	2	5.72178	2.26046	20.3957	11.1158	5.18394e-06	9.85428e-06	4.72996	0.991266	1	1	WT - Control	limma	5.18394e-06	9.85428e-06	TRUE	hit	5.72178
1021	YEATS2	Q9ULM3	YEATS domain-containing protein 2 OS=Homo sapiens GN=YEATS2 PE=1 SV=2	1	4	3	2	5.61864	2.22971	20.1946	11.1153	1.95857e-06	4.41654e-06	5.53089	0.991266	1	1	WT - Control	limma	1.95857e-06	4.41654e-06	TRUE	hit	5.61864
1022	MEN1	E7EN32|O00255|O00255-2|O00255-3	Menin OS=Homo sapiens GN=MEN1 PE=1 SV=1|Menin OS=Homo sapiens GN=MEN1 PE=1 SV=4|Isoform 2 of Menin OS=Homo sapiens GN=MEN1|Isoform 3 of Menin OS=Homo sapiens GN=MEN1	1	4	3	2	6.14247	3.15854	20.7953	11.1136	1.96095e-06	4.41751e-06	5.52961	0.991268	1	1	WT - Control	limma	1.96095e-06	4.41751e-06	TRUE	hit	6.14247
1023	NPRL3	B7Z6Q0|Q12980	Nitrogen permease regulator 3-like protein OS=Homo sapiens GN=NPRL3 PE=1 SV=1|Nitrogen permease regulator 3-like protein OS=Homo sapiens GN=NPRL3 PE=1 SV=1	1	4	3	3	6.02129	2.90952	20.2348	11.1115	5.19881e-06	9.85771e-06	4.72697	0.991269	1	1	WT - Control	limma	5.19881e-06	9.85771e-06	TRUE	hit	6.02129
1024	LIG3	P49916|P49916-2|P49916-3|P49916-4	DNA ligase 3 OS=Homo sapiens GN=LIG3 PE=1 SV=2|Isoform 2 of DNA ligase 3 OS=Homo sapiens GN=LIG3|Isoform 3 of DNA ligase 3 OS=Homo sapiens GN=LIG3|Isoform 4 of DNA ligase 3 OS=Homo sapiens GN=LIG3	1	4	3	4	6.17193	1.95605	21.6184	11.0904	1.99471e-06	4.4891e-06	5.51164	0.991286	1	1	WT - Control	limma	1.99471e-06	4.4891e-06	TRUE	hit	6.17193
1025	EIF3K	K7ERF1|K7ES31|Q9UBQ5|Q9UBQ5-2	Eukaryotic translation initiation factor 3 subunit K OS=Homo sapiens GN=EIF3K PE=1 SV=1|Eukaryotic translation initiation factor 3 subunit K OS=Homo sapiens GN=EIF3K PE=1 SV=1|Eukaryotic translation initiation factor 3 subunit K OS=Homo sapiens GN=EIF3K PE=1 SV=1|Isoform 2 of Eukaryotic translation initiation factor 3 subunit K OS=Homo sapiens GN=EIF3K	1	4	3	3	6.41772	2.18164	21.5043	11.0856	2.00189e-06	4.50076e-06	5.50786	0.99129	1	1	WT - Control	limma	2.00189e-06	4.50076e-06	TRUE	hit	6.41772
1026	C2ORF47	Q8WWC4	Uncharacterized protein C2orf47, mitochondrial OS=Homo sapiens GN=C2orf47 PE=1 SV=1	1	4	3	5	6.82389	5.03152	22.3674	11.0717	2.02251e-06	4.54124e-06	5.49706	0.991301	1	1	WT - Control	limma	2.02251e-06	4.54124e-06	TRUE	hit	6.82389
1027	EIF6	P56537	Eukaryotic translation initiation factor 6 OS=Homo sapiens GN=EIF6 PE=1 SV=1	1	4	3	5	6.29769	2.36131	22.3787	11.0707	2.0239e-06	4.54124e-06	5.49634	0.991301	1	1	WT - Control	limma	2.0239e-06	4.54124e-06	TRUE	hit	6.29769
1028	RBBP7	Q16576|Q16576-2	Histone-binding protein RBBP7 OS=Homo sapiens GN=RBBP7 PE=1 SV=1|Isoform 2 of Histone-binding protein RBBP7 OS=Homo sapiens GN=RBBP7	1	4	3	3	6.4026	2.05876	22.4561	11.0676	2.02866e-06	4.54344e-06	5.49386	0.991304	1	1	WT - Control	limma	2.02866e-06	4.54344e-06	TRUE	hit	6.4026
1029	TM9SF3	Q5TB53|Q9HD45	Transmembrane 9 superfamily member (Fragment) OS=Homo sapiens GN=TM9SF3 PE=1 SV=7|Transmembrane 9 superfamily member 3 OS=Homo sapiens GN=TM9SF3 PE=1 SV=2	1	4	3	4	6.54819	3.78491	21.988	11.0674	2.0289e-06	4.54344e-06	5.49374	0.991304	1	1	WT - Control	limma	2.0289e-06	4.54344e-06	TRUE	hit	6.54819
1030	TMPO	P42166|P42167	Lamina-associated polypeptide 2, isoform alpha OS=Homo sapiens GN=TMPO PE=1 SV=2|Lamina-associated polypeptide 2, isoforms beta/gamma OS=Homo sapiens GN=TMPO PE=1 SV=2	1	4	3	13	6.64223	1.99607	23.5499	11.0642	2.03367e-06	4.54962e-06	5.49127	0.991306	1	1	WT - Control	limma	2.03367e-06	4.54962e-06	TRUE	hit	6.64223
1031	GAK	O14976|O14976-2	Cyclin-G-associated kinase OS=Homo sapiens GN=GAK PE=1 SV=2|Isoform 2 of Cyclin-G-associated kinase OS=Homo sapiens GN=GAK	1	4	3	2	6.00405	2.36802	20.133	11.0568	2.04485e-06	4.56385e-06	5.48549	0.991312	1	1	WT - Control	limma	2.04485e-06	4.56385e-06	TRUE	hit	6.00405
1032	VARS	P26640	Valine--tRNA ligase OS=Homo sapiens GN=VARS PE=1 SV=4	1	4	3	13	6.64367	3.38311	22.4635	11.0564	2.04542e-06	4.56385e-06	5.4852	0.991313	1	1	WT - Control	limma	2.04542e-06	4.56385e-06	TRUE	hit	6.64367
1033	ATP5F1	P24539|Q5QNZ2	ATP synthase F(0) complex subunit B1, mitochondrial OS=Homo sapiens GN=ATP5F1 PE=1 SV=2|ATP synthase F(0) complex subunit B1, mitochondrial OS=Homo sapiens GN=ATP5F1 PE=1 SV=1	1	4	3	6	6.846	2.74438	22.2872	11.056	2.04607e-06	4.56385e-06	5.48486	0.991313	1	1	WT - Control	limma	2.04607e-06	4.56385e-06	TRUE	hit	6.846
1034	INTS2	J3KMZ7|Q9H0H0	Integrator complex subunit 2 OS=Homo sapiens GN=INTS2 PE=1 SV=1|Integrator complex subunit 2 OS=Homo sapiens GN=INTS2 PE=1 SV=2	1	4	3	3	5.84071	2.57406	21.8149	11.0537	2.04948e-06	4.56594e-06	5.48311	0.991315	1	1	WT - Control	limma	2.04948e-06	4.56594e-06	TRUE	hit	5.84071
1035	ATR	Q13535|Q13535-2|Q13535-3	Serine/threonine-protein kinase ATR OS=Homo sapiens GN=ATR PE=1 SV=3|Isoform 2 of Serine/threonine-protein kinase ATR OS=Homo sapiens GN=ATR|Isoform 3 of Serine/threonine-protein kinase ATR OS=Homo sapiens GN=ATR	1	4	3	7	5.84953	2.71207	21.0001	11.0504	2.05457e-06	4.56594e-06	5.4805	0.991317	1	1	WT - Control	limma	2.05457e-06	4.56594e-06	TRUE	hit	5.84953
1036	POLA2	Q14181	DNA polymerase alpha subunit B OS=Homo sapiens GN=POLA2 PE=1 SV=2	1	4	3	4	6.0105	2.70624	21.3361	11.0501	2.05508e-06	4.56594e-06	5.48023	0.991318	1	1	WT - Control	limma	2.05508e-06	4.56594e-06	TRUE	hit	6.0105
1037	KPNB1	Q14974	Importin subunit beta-1 OS=Homo sapiens GN=KPNB1 PE=1 SV=2	1	4	3	9	7.18685	2.54922	22.8567	11.0413	2.0685e-06	4.59126e-06	5.47338	0.991324	1	1	WT - Control	limma	2.0685e-06	4.59126e-06	TRUE	hit	7.18685
1038	MRPS2	Q9Y399	28S ribosomal protein S2, mitochondrial OS=Homo sapiens GN=MRPS2 PE=1 SV=1	1	4	3	4	5.98838	2.86027	20.8854	11.0387	2.07235e-06	4.5953e-06	5.47142	0.991326	1	1	WT - Control	limma	2.07235e-06	4.5953e-06	TRUE	hit	5.98838
1039	FARP2	H7C3M7|O94887	FERM, RhoGEF and pleckstrin domain-containing protein 2 (Fragment) OS=Homo sapiens GN=FARP2 PE=1 SV=2|FERM, RhoGEF and pleckstrin domain-containing protein 2 OS=Homo sapiens GN=FARP2 PE=1 SV=3	1	4	3	6	5.94886	2.50269	22.4754	11.0342	2.07938e-06	4.60638e-06	5.46785	0.99133	1	1	WT - Control	limma	2.07938e-06	4.60638e-06	TRUE	hit	5.94886
1040	HAUS7	Q99871|Q99871-2|Q99871-3	HAUS augmin-like complex subunit 7 OS=Homo sapiens GN=HAUS7 PE=1 SV=3|Isoform 2 of HAUS augmin-like complex subunit 7 OS=Homo sapiens GN=HAUS7|Isoform 3 of HAUS augmin-like complex subunit 7 OS=Homo sapiens GN=HAUS7	1	4	3	2	5.86475	2.52974	20.5589	11.0327	2.08165e-06	4.6069e-06	5.4667	0.991331	1	1	WT - Control	limma	2.08165e-06	4.6069e-06	TRUE	hit	5.86475
1041	ERBB4	A0A0A0MSE1|Q15303|Q15303-2|Q15303-3|Q15303-4	Receptor protein-tyrosine kinase OS=Homo sapiens GN=ERBB4 PE=1 SV=1|Receptor tyrosine-protein kinase erbB-4 OS=Homo sapiens GN=ERBB4 PE=1 SV=1|Isoform JM-B CYT-1 of Receptor tyrosine-protein kinase erbB-4 OS=Homo sapiens GN=ERBB4|Isoform JM-A CYT-2 of Receptor tyrosine-protein kinase erbB-4 OS=Homo sapiens GN=ERBB4|Isoform JM-B CYT-2 of Receptor tyrosine-protein kinase erbB-4 OS=Homo sapiens GN=E…	1	4	3	2	5.96931	2.37932	19.6769	11.0148	2.10937e-06	4.66368e-06	5.45276	0.991345	1	1	WT - Control	limma	2.10937e-06	4.66368e-06	TRUE	hit	5.96931
1042	DOCK11	A6NIW2|Q5JSL3	Dedicator of cytokinesis protein 11 OS=Homo sapiens GN=DOCK11 PE=1 SV=2|Dedicator of cytokinesis protein 11 OS=Homo sapiens GN=DOCK11 PE=1 SV=2	1	4	3	3	5.51309	2.20638	20.1759	11.0009	2.13123e-06	4.70742e-06	5.4419	0.991356	1	1	WT - Control	limma	2.13123e-06	4.70742e-06	TRUE	hit	5.51309
1043	KIF1B	O60333-3	Isoform 3 of Kinesin-like protein KIF1B OS=Homo sapiens GN=KIF1B	1	4	3	2	6.00792	2.81095	20.284	10.9985	2.1351e-06	4.71138e-06	5.43998	0.991358	1	1	WT - Control	limma	2.1351e-06	4.71138e-06	TRUE	hit	6.00792
1044	PLCG1	P19174|P19174-2	1-phosphatidylinositol 4,5-bisphosphate phosphodiesterase gamma-1 OS=Homo sapiens GN=PLCG1 PE=1 SV=1|Isoform 2 of 1-phosphatidylinositol 4,5-bisphosphate phosphodiesterase gamma-1 OS=Homo sapiens GN=PLCG1	1	4	3	4	5.6502	2.19002	20.4574	10.9939	2.14244e-06	4.72296e-06	5.43637	0.991362	1	1	WT - Control	limma	2.14244e-06	4.72296e-06	TRUE	hit	5.6502
1045	WDR91	A4D1P6|A4D1P6-2	WD repeat-containing protein 91 OS=Homo sapiens GN=WDR91 PE=1 SV=2|Isoform 2 of WD repeat-containing protein 91 OS=Homo sapiens GN=WDR91	1	4	3	2	5.47721	2.25812	19.6334	10.9868	5.64425e-06	1.05958e-05	4.64112	0.991367	1	1	WT - Control	limma	5.64425e-06	1.05958e-05	TRUE	hit	5.47721
1046	AURKB	J3KRF8|J3KTD6|Q96GD4|Q96GD4-2|Q96GD4-3|Q96GD4-5	Aurora kinase B OS=Homo sapiens GN=AURKB PE=1 SV=1|Aurora kinase B (Fragment) OS=Homo sapiens GN=AURKB PE=1 SV=1|Aurora kinase B OS=Homo sapiens GN=AURKB PE=1 SV=3|Isoform 2 of Aurora kinase B OS=Homo sapiens GN=AURKB|Isoform 3 of Aurora kinase B OS=Homo sapiens GN=AURKB|Isoform 5 of Aurora kinase B OS=Homo sapiens GN=AURKB	1	4	3	2	6.60008	2.51857	19.6719	10.9573	2.2015e-06	4.84374e-06	5.40771	0.99139	1	1	WT - Control	limma	2.2015e-06	4.84374e-06	TRUE	hit	6.60008
1047	IGF2BP3	O00425	Insulin-like growth factor 2 mRNA-binding protein 3 OS=Homo sapiens GN=IGF2BP3 PE=1 SV=2	1	4	3	4	5.8653	2.34566	20.7692	10.9504	2.21287e-06	4.86402e-06	5.40228	0.991396	1	1	WT - Control	limma	2.21287e-06	4.86402e-06	TRUE	hit	5.8653
1048	UBE2Q1	Q7Z7E8|Q7Z7E8-2	Ubiquitin-conjugating enzyme E2 Q1 OS=Homo sapiens GN=UBE2Q1 PE=1 SV=1|Isoform 2 of Ubiquitin-conjugating enzyme E2 Q1 OS=Homo sapiens GN=UBE2Q1	1	4	3	4	6.12665	2.7511	21.286	10.9459	2.22026e-06	4.87553e-06	5.39876	0.991399	1	1	WT - Control	limma	2.22026e-06	4.87553e-06	TRUE	hit	6.12665
1049	DDX28	Q9NUL7	Probable ATP-dependent RNA helicase DDX28 OS=Homo sapiens GN=DDX28 PE=1 SV=2	1	4	3	2	6.06776	2.45371	19.9398	10.9394	2.23111e-06	4.88994e-06	5.39363	0.991404	1	1	WT - Control	limma	2.23111e-06	4.88994e-06	TRUE	hit	6.06776
1050	THOC2	Q8NI27	THO complex subunit 2 OS=Homo sapiens GN=THOC2 PE=1 SV=2	1	4	3	8	6.6339	2.55168	22.6459	10.9394	2.23114e-06	4.88994e-06	5.39361	0.991404	1	1	WT - Control	limma	2.23114e-06	4.88994e-06	TRUE	hit	6.6339
1051	MMP15	P51511	Matrix metalloproteinase-15 OS=Homo sapiens GN=MMP15 PE=1 SV=1	1	4	3	2	6.12492	3.21174	20.1832	10.9304	2.24609e-06	4.91795e-06	5.38657	0.991411	1	1	WT - Control	limma	2.24609e-06	4.91795e-06	TRUE	hit	6.12492
1052	ZNF281	Q9Y2X9|Q9Y2X9-2	Zinc finger protein 281 OS=Homo sapiens GN=ZNF281 PE=1 SV=1|Isoform 2 of Zinc finger protein 281 OS=Homo sapiens GN=ZNF281	1	4	3	9	6.50608	3.22408	22.8962	10.922	2.26026e-06	4.94027e-06	5.37994	0.991418	1	1	WT - Control	limma	2.26026e-06	4.94027e-06	TRUE	hit	6.50608
1053	HDAC2	Q92769|Q92769-3	Histone deacetylase 2 OS=Homo sapiens GN=HDAC2 PE=1 SV=2|Isoform 2 of Histone deacetylase 2 OS=Homo sapiens GN=HDAC2	1	4	3	4	6.49556	2.01636	22.491	10.9193	2.26491e-06	4.94027e-06	5.37777	0.99142	1	1	WT - Control	limma	2.26491e-06	4.94027e-06	TRUE	hit	6.49556
1054	NDUFS1	B4DJ81|P28331|P28331-2|P28331-3|P28331-4|P28331-5	NADH-ubiquinone oxidoreductase 75 kDa subunit, mitochondrial OS=Homo sapiens GN=NDUFS1 PE=1 SV=1|NADH-ubiquinone oxidoreductase 75 kDa subunit, mitochondrial OS=Homo sapiens GN=NDUFS1 PE=1 SV=3|Isoform 2 of NADH-ubiquinone oxidoreductase 75 kDa subunit, mitochondrial OS=Homo sapiens GN=NDUFS1|Isoform 3 of NADH-ubiquinone oxidoreductase 75 kDa subunit, mitochondrial OS=Homo sapiens GN=NDUFS1|Isofo…	1	4	3	3	5.84923	2.1336	20.1778	10.9183	2.2665e-06	4.94027e-06	5.37703	0.991421	1	1	WT - Control	limma	2.2665e-06	4.94027e-06	TRUE	hit	5.84923
1055	WDR11	Q9BZH6	WD repeat-containing protein 11 OS=Homo sapiens GN=WDR11 PE=1 SV=1	1	4	3	2	5.71837	2.1017	19.8211	10.9174	2.26808e-06	4.94027e-06	5.37629	0.991422	1	1	WT - Control	limma	2.26808e-06	4.94027e-06	TRUE	hit	5.71837
1056	KIAA1033	A0A087X256|Q2M389	WASH complex subunit 7 OS=Homo sapiens GN=KIAA1033 PE=1 SV=1|WASH complex subunit 7 OS=Homo sapiens GN=KIAA1033 PE=1 SV=2	1	4	3	8	6.14674	2.32388	22.6602	10.9166	2.26938e-06	4.94027e-06	5.37569	0.991422	1	1	WT - Control	limma	2.26938e-06	4.94027e-06	TRUE	hit	6.14674
1057	CD2BP2	O95400	CD2 antigen cytoplasmic tail-binding protein 2 OS=Homo sapiens GN=CD2BP2 PE=1 SV=1	1	4	3	2	6.00767	2.53905	20.1281	10.9075	2.28499e-06	4.96947e-06	5.36846	0.99143	1	1	WT - Control	limma	2.28499e-06	4.96947e-06	TRUE	hit	6.00767
1058	POLD1	M0R2B7|P28340	DNA polymerase OS=Homo sapiens GN=POLD1 PE=1 SV=1|DNA polymerase delta catalytic subunit OS=Homo sapiens GN=POLD1 PE=1 SV=2	1	4	3	3	6.41087	2.4984	21.1218	10.9052	2.28892e-06	4.97323e-06	5.36665	0.991431	1	1	WT - Control	limma	2.28892e-06	4.97323e-06	TRUE	hit	6.41087
1059	OXA1L	E7EVY0|J3KNA0|Q15070|Q15070-2|S4R3Q9	Mitochondrial inner membrane protein OXA1L OS=Homo sapiens GN=OXA1L PE=1 SV=1|Mitochondrial inner membrane protein OXA1L OS=Homo sapiens GN=OXA1L PE=1 SV=1|Mitochondrial inner membrane protein OXA1L OS=Homo sapiens GN=OXA1L PE=1 SV=3|Isoform 2 of Mitochondrial inner membrane protein OXA1L OS=Homo sapiens GN=OXA1L|Mitochondrial inner membrane protein OXA1L OS=Homo sapiens GN=OXA1L PE=1 SV=1	1	4	3	5	6.68359	5.02875	21.9455	10.9026	2.29333e-06	4.97805e-06	5.36462	0.991433	1	1	WT - Control	limma	2.29333e-06	4.97805e-06	TRUE	hit	6.68359
1060	UTP14A	Q9BVJ6	U3 small nucleolar RNA-associated protein 14 homolog A OS=Homo sapiens GN=UTP14A PE=1 SV=1	1	4	3	3	5.70826	2.74381	20.9604	10.8974	2.3023e-06	4.99272e-06	5.36051	0.991437	1	1	WT - Control	limma	2.3023e-06	4.99272e-06	TRUE	hit	5.70826
1061	NUDCD1	Q96RS6|Q96RS6-2|Q96RS6-3	NudC domain-containing protein 1 OS=Homo sapiens GN=NUDCD1 PE=1 SV=2|Isoform 2 of NudC domain-containing protein 1 OS=Homo sapiens GN=NUDCD1|Isoform 3 of NudC domain-containing protein 1 OS=Homo sapiens GN=NUDCD1	1	4	3	4	6.11755	3.43686	20.7504	10.8891	2.31668e-06	5.01575e-06	5.35394	0.991444	1	1	WT - Control	limma	2.31668e-06	5.01575e-06	TRUE	hit	6.11755
1062	POLR3B	Q9NW08|Q9NW08-2	DNA-directed RNA polymerase III subunit RPC2 OS=Homo sapiens GN=POLR3B PE=1 SV=2|Isoform 2 of DNA-directed RNA polymerase III subunit RPC2 OS=Homo sapiens GN=POLR3B	1	4	3	5	5.9232	2.99723	21.6378	10.8887	2.31735e-06	5.01575e-06	5.35363	0.991444	1	1	WT - Control	limma	2.31735e-06	5.01575e-06	TRUE	hit	5.9232
1063	SMARCA5	O60264	SWI/SNF-related matrix-associated actin-dependent regulator of chromatin subfamily A member 5 OS=Homo sapiens GN=SMARCA5 PE=1 SV=1	1	4	3	3	6.33839	2.25071	21.7224	10.8515	2.38299e-06	5.14798e-06	5.32417	0.991474	1	1	WT - Control	limma	2.38299e-06	5.14798e-06	TRUE	hit	6.33839
1064	ABHD3	Q8WU67	Phospholipase ABHD3 OS=Homo sapiens GN=ABHD3 PE=1 SV=2	1	4	3	2	5.65246	2.13148	20.0162	10.8476	2.38983e-06	5.15783e-06	5.32115	0.991477	1	1	WT - Control	limma	2.38983e-06	5.15783e-06	TRUE	hit	5.65246
1065	ZCCHC11	A0A0C4DFM7|Q5TAX3	Terminal uridylyltransferase 4 OS=Homo sapiens GN=ZCCHC11 PE=1 SV=1|Terminal uridylyltransferase 4 OS=Homo sapiens GN=ZCCHC11 PE=1 SV=3	1	4	3	6	5.85616	1.9057	21.2744	10.8411	2.40159e-06	5.17829e-06	5.31597	0.991482	1	1	WT - Control	limma	2.40159e-06	5.17829e-06	TRUE	hit	5.85616
1066	GPAA1	E9PQ31|O43292|O43292-2	Glycosylphosphatidylinositol anchor attachment 1 protein (Fragment) OS=Homo sapiens GN=GPAA1 PE=1 SV=2|Glycosylphosphatidylinositol anchor attachment 1 protein OS=Homo sapiens GN=GPAA1 PE=1 SV=3|Isoform 2 of Glycosylphosphatidylinositol anchor attachment 1 protein OS=Homo sapiens GN=GPAA1	1	4	3	2	6.06777	2.24729	21.1747	10.7989	6.39922e-06	1.18075e-05	4.5098	0.991515	1	1	WT - Control	limma	6.39922e-06	1.18075e-05	TRUE	hit	6.06777
1067	OTULIN	Q96BN8	Ubiquitin thioesterase otulin OS=Homo sapiens GN=OTULIN PE=1 SV=3	1	4	3	3	5.6957	2.75538	20.7916	10.7927	6.42577e-06	1.18276e-05	4.56706	0.99152	1	1	WT - Control	limma	6.42577e-06	1.18276e-05	TRUE	hit	5.6957
1068	NUP98	P52948|P52948-5	Nuclear pore complex protein Nup98-Nup96 OS=Homo sapiens GN=NUP98 PE=1 SV=4|Isoform 5 of Nuclear pore complex protein Nup98-Nup96 OS=Homo sapiens GN=NUP98	1	4	3	7	6.38376	1.96723	23.2025	10.7886	2.49845e-06	5.382e-06	5.27425	0.991523	1	1	WT - Control	limma	2.49845e-06	5.382e-06	TRUE	hit	6.38376
1069	RASAL2	H0Y638|Q9UJF2|Q9UJF2-2	Ras GTPase-activating protein nGAP (Fragment) OS=Homo sapiens GN=RASAL2 PE=1 SV=1|Ras GTPase-activating protein nGAP OS=Homo sapiens GN=RASAL2 PE=1 SV=2|Isoform 2 of Ras GTPase-activating protein nGAP OS=Homo sapiens GN=RASAL2	1	4	3	3	5.64849	2.50661	19.6672	10.7532	6.59921e-06	1.20879e-05	4.47757	0.991551	1	1	WT - Control	limma	6.59921e-06	1.20879e-05	TRUE	hit	5.64849
1070	UMPS	P11172|P11172-3	Uridine 5'-monophosphate synthase OS=Homo sapiens GN=UMPS PE=1 SV=1|Isoform 3 of Uridine 5'-monophosphate synthase OS=Homo sapiens GN=UMPS	1	4	3	5	6.62878	3.71252	22.209	10.7485	2.57547e-06	5.54265e-06	5.2422	0.991554	1	1	WT - Control	limma	2.57547e-06	5.54265e-06	TRUE	hit	6.62878
1071	PGM3	O95394|O95394-3	Phosphoacetylglucosamine mutase OS=Homo sapiens GN=PGM3 PE=1 SV=1|Isoform 2 of Phosphoacetylglucosamine mutase OS=Homo sapiens GN=PGM3	1	4	3	5	6.42227	3.24344	21.6889	10.7387	2.59465e-06	5.57332e-06	5.23437	0.991562	1	1	WT - Control	limma	2.59465e-06	5.57332e-06	TRUE	hit	6.42227
1072	PSMD2	Q13200	26S proteasome non-ATPase regulatory subunit 2 OS=Homo sapiens GN=PSMD2 PE=1 SV=3	1	4	3	12	6.25354	1.95905	23.0682	10.7018	2.66844e-06	5.72333e-06	5.20476	0.991591	1	1	WT - Control	limma	2.66844e-06	5.72333e-06	TRUE	hit	6.25354
1073	MCCC1	Q96RQ3	Methylcrotonoyl-CoA carboxylase subunit alpha, mitochondrial OS=Homo sapiens GN=MCCC1 PE=1 SV=3	1	4	3	4	5.69991	2.25274	21.0508	10.7004	2.67123e-06	5.72333e-06	5.20366	0.991592	1	1	WT - Control	limma	2.67123e-06	5.72333e-06	TRUE	hit	5.69991
1074	RRP12	Q5JTH9|Q5JTH9-2|Q5JTH9-3	RRP12-like protein OS=Homo sapiens GN=RRP12 PE=1 SV=2|Isoform 2 of RRP12-like protein OS=Homo sapiens GN=RRP12|Isoform 3 of RRP12-like protein OS=Homo sapiens GN=RRP12	1	4	3	5	6.55212	2.83534	21.5541	10.7	2.67212e-06	5.72333e-06	5.20331	0.991593	1	1	WT - Control	limma	2.67212e-06	5.72333e-06	TRUE	hit	6.55212
1075	FBN2	A0A087WYV8|P35556	Fibrillin-2 OS=Homo sapiens GN=FBN2 PE=1 SV=1|Fibrillin-2 OS=Homo sapiens GN=FBN2 PE=1 SV=3	1	4	3	6	6.35096	3.88705	21.218	10.6988	2.6746e-06	5.72333e-06	5.20233	0.991594	1	1	WT - Control	limma	2.6746e-06	5.72333e-06	TRUE	hit	6.35096
1076	UBE3A	A0A0D9SG77|Q05086|Q05086-2|Q05086-3	Ubiquitin-protein ligase E3A OS=Homo sapiens GN=UBE3A PE=1 SV=1|Ubiquitin-protein ligase E3A OS=Homo sapiens GN=UBE3A PE=1 SV=4|Isoform I of Ubiquitin-protein ligase E3A OS=Homo sapiens GN=UBE3A|Isoform III of Ubiquitin-protein ligase E3A OS=Homo sapiens GN=UBE3A	1	4	3	3	5.62683	2.06675	20.7164	10.6727	2.72832e-06	5.82366e-06	5.18132	0.991614	1	1	WT - Control	limma	2.72832e-06	5.82366e-06	TRUE	hit	5.62683
1077	NUMA1	A0A087WY61|Q14980|Q14980-2	Nuclear mitotic apparatus protein 1 OS=Homo sapiens GN=NUMA1 PE=1 SV=1|Nuclear mitotic apparatus protein 1 OS=Homo sapiens GN=NUMA1 PE=1 SV=2|Isoform 2 of Nuclear mitotic apparatus protein 1 OS=Homo sapiens GN=NUMA1	1	4	3	5	5.69284	2.27521	20.9545	10.6722	2.7292e-06	5.82366e-06	5.18098	0.991614	1	1	WT - Control	limma	2.7292e-06	5.82366e-06	TRUE	hit	5.69284
1078	MAT2A	P31153	S-adenosylmethionine synthase isoform type-2 OS=Homo sapiens GN=MAT2A PE=1 SV=1	1	4	3	7	6.5283	2.33527	23.0847	10.6554	2.76455e-06	5.89354e-06	5.16739	0.991628	1	1	WT - Control	limma	2.76455e-06	5.89354e-06	TRUE	hit	6.5283
1079	TBC1D15	Q8TC07|Q8TC07-2|Q8TC07-3	TBC1 domain family member 15 OS=Homo sapiens GN=TBC1D15 PE=1 SV=2|Isoform 2 of TBC1 domain family member 15 OS=Homo sapiens GN=TBC1D15|Isoform 3 of TBC1 domain family member 15 OS=Homo sapiens GN=TBC1D15	1	4	3	3	6.1519	2.04692	20.683	10.65	2.77597e-06	5.90587e-06	5.16303	0.991632	1	1	WT - Control	limma	2.77597e-06	5.90587e-06	TRUE	hit	6.1519
1080	QSOX2	A0A087X176|Q6ZRP7	Sulfhydryl oxidase OS=Homo sapiens GN=QSOX2 PE=1 SV=1|Sulfhydryl oxidase 2 OS=Homo sapiens GN=QSOX2 PE=1 SV=3	1	4	3	6	6.74961	4.26843	22.3978	10.6486	2.77877e-06	5.90587e-06	5.16197	0.991633	1	1	WT - Control	limma	2.77877e-06	5.90587e-06	TRUE	hit	6.74961
1081	GTF2F2	P13984	General transcription factor IIF subunit 2 OS=Homo sapiens GN=GTF2F2 PE=1 SV=2	1	4	3	2	5.8185	1.893	20.6897	10.6477	2.78074e-06	5.90587e-06	5.16122	0.991634	1	1	WT - Control	limma	2.78074e-06	5.90587e-06	TRUE	hit	5.8185
1082	CCT4	P50991	T-complex protein 1 subunit delta OS=Homo sapiens GN=CCT4 PE=1 SV=4	1	4	3	19	7.16273	2.22761	24.3664	10.6477	2.78077e-06	5.90587e-06	5.16121	0.991634	1	1	WT - Control	limma	2.78077e-06	5.90587e-06	TRUE	hit	7.16273
1083	PSMC3	P17980|R4GNH3	26S protease regulatory subunit 6A OS=Homo sapiens GN=PSMC3 PE=1 SV=3|26S protease regulatory subunit 6A OS=Homo sapiens GN=PSMC3 PE=1 SV=1	1	4	3	9	6.66978	1.86255	23.0696	10.6394	2.79843e-06	5.93782e-06	5.15452	0.99164	1	1	WT - Control	limma	2.79843e-06	5.93782e-06	TRUE	hit	6.66978
1084	NUP54	Q7Z3B4|Q7Z3B4-2|Q7Z3B4-3	Nucleoporin p54 OS=Homo sapiens GN=NUP54 PE=1 SV=2|Isoform 2 of Nucleoporin p54 OS=Homo sapiens GN=NUP54|Isoform 3 of Nucleoporin p54 OS=Homo sapiens GN=NUP54	1	4	3	2	6.17511	2.17672	20.8233	10.6305	2.81756e-06	5.97281e-06	5.14732	0.991647	1	1	WT - Control	limma	2.81756e-06	5.97281e-06	TRUE	hit	6.17511
1085	TNPO1	Q92973|Q92973-2|Q92973-3	Transportin-1 OS=Homo sapiens GN=TNPO1 PE=1 SV=2|Isoform 2 of Transportin-1 OS=Homo sapiens GN=TNPO1|Isoform 3 of Transportin-1 OS=Homo sapiens GN=TNPO1	1	4	3	2	6.71571	3.65679	22.538	10.629	2.8209e-06	5.9743e-06	5.14607	0.991648	1	1	WT - Control	limma	2.8209e-06	5.9743e-06	TRUE	hit	6.71571
1086	AGPAT1	Q99943	1-acyl-sn-glycerol-3-phosphate acyltransferase alpha OS=Homo sapiens GN=AGPAT1 PE=1 SV=2	1	4	3	2	6.03132	2.83776	19.5945	10.6228	7.2105e-06	1.31249e-05	4.3847	0.991653	1	1	WT - Control	limma	7.2105e-06	1.31249e-05	TRUE	hit	6.03132
1087	USP9X	Q93008|Q93008-1	Probable ubiquitin carboxyl-terminal hydrolase FAF-X OS=Homo sapiens GN=USP9X PE=1 SV=3|Isoform 2 of Probable ubiquitin carboxyl-terminal hydrolase FAF-X OS=Homo sapiens GN=USP9X	1	4	3	6	6.35549	1.88888	21.5954	10.5979	2.88878e-06	6.10664e-06	5.12095	0.991673	1	1	WT - Control	limma	2.88878e-06	6.10664e-06	TRUE	hit	6.35549
1088	PRSS12	P56730	Neurotrypsin OS=Homo sapiens GN=PRSS12 PE=2 SV=2	1	4	3	2	5.86324	2.35015	20.0514	10.596	2.89297e-06	6.10949e-06	5.11942	0.991674	1	1	WT - Control	limma	2.89297e-06	6.10949e-06	TRUE	hit	5.86324
1089	KIAA0319L	E7EN73|Q8IZA0|Q8IZA0-2	Dyslexia-associated protein KIAA0319-like protein (Fragment) OS=Homo sapiens GN=KIAA0319L PE=1 SV=1|Dyslexia-associated protein KIAA0319-like protein OS=Homo sapiens GN=KIAA0319L PE=1 SV=2|Isoform 2 of Dyslexia-associated protein KIAA0319-like protein OS=Homo sapiens GN=KIAA0319L	1	4	3	2	5.92736	2.08965	20.151	10.5949	2.89553e-06	6.10949e-06	5.11848	0.991675	1	1	WT - Control	limma	2.89553e-06	6.10949e-06	TRUE	hit	5.92736
1090	UQCRFS1	P47985	Cytochrome b-c1 complex subunit Rieske, mitochondrial OS=Homo sapiens GN=UQCRFS1 PE=1 SV=2	1	4	3	2	6.4414	2.95895	20.3176	10.5844	2.91889e-06	6.15304e-06	5.10999	0.991683	1	1	WT - Control	limma	2.91889e-06	6.15304e-06	TRUE	hit	6.4414
1091	BABAM1	M0R0I0|M0R193|M0R2A4|M0R2I2|M0R2K3|M0R3F4|Q9NWV8	BRISC and BRCA1-A complex member 1 (Fragment) OS=Homo sapiens GN=BABAM1 PE=1 SV=1|BRISC and BRCA1-A complex member 1 (Fragment) OS=Homo sapiens GN=BABAM1 PE=1 SV=1|BRISC and BRCA1-A complex member 1 (Fragment) OS=Homo sapiens GN=BABAM1 PE=1 SV=1|BRISC and BRCA1-A complex member 1 (Fragment) OS=Homo sapiens GN=BABAM1 PE=1 SV=1|BRISC and BRCA1-A complex member 1 (Fragment) OS=Homo sapiens GN=BABAM1…	1	4	3	2	5.72909	2.24537	20.3965	10.5822	2.9239e-06	6.15788e-06	5.10818	0.991685	1	1	WT - Control	limma	2.9239e-06	6.15788e-06	TRUE	hit	5.72909
1092	PLD6	Q8N2A8	Mitochondrial cardiolipin hydrolase OS=Homo sapiens GN=PLD6 PE=1 SV=1	1	4	3	2	5.77891	2.38867	19.6769	10.5802	2.9283e-06	6.1614e-06	5.10659	0.991687	1	1	WT - Control	limma	2.9283e-06	6.1614e-06	TRUE	hit	5.77891
1093	DCAF11	Q8TEB1|Q8TEB1-2	DDB1- and CUL4-associated factor 11 OS=Homo sapiens GN=DCAF11 PE=1 SV=1|Isoform 2 of DDB1- and CUL4-associated factor 11 OS=Homo sapiens GN=DCAF11	1	4	3	3	5.96282	2.91201	20.5131	10.5774	2.93469e-06	6.16912e-06	5.10429	0.991689	1	1	WT - Control	limma	2.93469e-06	6.16912e-06	TRUE	hit	5.96282
1094	CNOT3	O75175	CCR4-NOT transcription complex subunit 3 OS=Homo sapiens GN=CNOT3 PE=1 SV=1	1	4	3	2	5.88308	2.14663	20.9463	10.5739	2.94246e-06	6.17972e-06	5.10149	0.991692	1	1	WT - Control	limma	2.94246e-06	6.17972e-06	TRUE	hit	5.88308
1095	TMEM184B	A0A0J9YYJ3|Q9Y519	Transmembrane protein 184B (Fragment) OS=Homo sapiens GN=TMEM184B PE=1 SV=1|Transmembrane protein 184B OS=Homo sapiens GN=TMEM184B PE=1 SV=2	1	4	3	2	6.23612	3.14955	19.7532	10.5695	2.95244e-06	6.18919e-06	5.09791	0.991695	1	1	WT - Control	limma	2.95244e-06	6.18919e-06	TRUE	hit	6.23612
1096	DPYSL3	Q14195|Q14195-2	Dihydropyrimidinase-related protein 3 OS=Homo sapiens GN=DPYSL3 PE=1 SV=1|Isoform LCRMP-4 of Dihydropyrimidinase-related protein 3 OS=Homo sapiens GN=DPYSL3	1	4	3	5	5.60784	1.89672	20.9199	10.5516	2.99355e-06	6.26956e-06	5.0833	0.991709	1	1	WT - Control	limma	2.99355e-06	6.26956e-06	TRUE	hit	5.60784
1097	RPS2	H0YEN5|P15880	40S ribosomal protein S2 (Fragment) OS=Homo sapiens GN=RPS2 PE=1 SV=1|40S ribosomal protein S2 OS=Homo sapiens GN=RPS2 PE=1 SV=2	1	4	3	6	7.72419	1.92802	23.9774	10.5407	3.01861e-06	6.3162e-06	5.07448	0.991718	1	1	WT - Control	limma	3.01861e-06	6.3162e-06	TRUE	hit	7.72419
1098	GK|GK3P	P32189|P32189-1|P32189-2|P32189-4|Q14409	Glycerol kinase OS=Homo sapiens GN=GK PE=1 SV=3|Isoform 1 of Glycerol kinase OS=Homo sapiens GN=GK|Isoform 2 of Glycerol kinase OS=Homo sapiens GN=GK|Isoform 4 of Glycerol kinase OS=Homo sapiens GN=GK|Putative glycerol kinase 3 OS=Homo sapiens GN=GK3P PE=5 SV=2	1	4	3	2	6.09183	4.00833	20.6588	10.5303	3.04309e-06	6.35033e-06	5.06595	0.991726	1	1	WT - Control	limma	3.04309e-06	6.35033e-06	TRUE	hit	6.09183
1099	GART	P22102	Trifunctional purine biosynthetic protein adenosine-3 OS=Homo sapiens GN=GART PE=1 SV=1	1	4	3	9	6.75136	2.71244	23.3972	10.5302	3.04334e-06	6.35033e-06	5.06586	0.991726	1	1	WT - Control	limma	3.04334e-06	6.35033e-06	TRUE	hit	6.75136
1100	PSMA7	H0Y586|O14818|O14818-2	Proteasome subunit alpha type-7 (Fragment) OS=Homo sapiens GN=PSMA7 PE=1 SV=1|Proteasome subunit alpha type-7 OS=Homo sapiens GN=PSMA7 PE=1 SV=1|Isoform 2 of Proteasome subunit alpha type-7 OS=Homo sapiens GN=PSMA7	1	4	3	4	6.47052	2.74985	21.8999	10.5139	3.08183e-06	6.42474e-06	5.05257	0.991739	1	1	WT - Control	limma	3.08183e-06	6.42474e-06	TRUE	hit	6.47052
1101	BACE2	Q9Y5Z0|Q9Y5Z0-2|Q9Y5Z0-3	Beta-secretase 2 OS=Homo sapiens GN=BACE2 PE=1 SV=1|Isoform 2 of Beta-secretase 2 OS=Homo sapiens GN=BACE2|Isoform 3 of Beta-secretase 2 OS=Homo sapiens GN=BACE2	1	4	3	3	5.76154	2.84504	20.2446	10.512	7.78014e-06	1.40464e-05	4.3049	0.99174	1	1	WT - Control	limma	7.78014e-06	1.40464e-05	TRUE	hit	5.76154
1102	NAMPT	P43490	Nicotinamide phosphoribosyltransferase OS=Homo sapiens GN=NAMPT PE=1 SV=1	1	4	3	6	6.6401	1.91269	22.289	10.4954	3.12616e-06	6.51116e-06	5.03747	0.991753	1	1	WT - Control	limma	3.12616e-06	6.51116e-06	TRUE	hit	6.6401
1103	MACF1	H0Y390|H3BPE1|H3BQK9|Q9UPN3|Q9UPN3-2|Q9UPN3-3|Q9UPN3-4	Microtubule-actin cross-linking factor 1, isoforms 1/2/3/5 (Fragment) OS=Homo sapiens GN=MACF1 PE=1 SV=1|Microtubule-actin cross-linking factor 1, isoforms 1/2/3/5 OS=Homo sapiens GN=MACF1 PE=1 SV=1|Microtubule-actin cross-linking factor 1, isoforms 1/2/3/5 OS=Homo sapiens GN=MACF1 PE=1 SV=1|Microtubule-actin cross-linking factor 1, isoforms 1/2/3/5 OS=Homo sapiens GN=MACF1 PE=1 SV=4|Isoform 2 of…	1	4	3	3	5.54059	1.81908	20.1111	10.4851	3.15132e-06	6.55752e-06	5.029	0.991761	1	1	WT - Control	limma	3.15132e-06	6.55752e-06	TRUE	hit	5.54059
1104	PYGL	P06737|P06737-2	Glycogen phosphorylase, liver form OS=Homo sapiens GN=PYGL PE=1 SV=4|Isoform 2 of Glycogen phosphorylase, liver form OS=Homo sapiens GN=PYGL	1	4	3	10	6.32565	1.81984	23.0411	10.4788	3.16649e-06	6.58305e-06	5.02391	0.991766	1	1	WT - Control	limma	3.16649e-06	6.58305e-06	TRUE	hit	6.32565
1105	CTR9	Q6PD62	RNA polymerase-associated protein CTR9 homolog OS=Homo sapiens GN=CTR9 PE=1 SV=1	1	4	3	2	5.86598	2.44225	21.1708	10.4774	3.16998e-06	6.58424e-06	5.02275	0.991767	1	1	WT - Control	limma	3.16998e-06	6.58424e-06	TRUE	hit	5.86598
1106	FUBP1	E9PEB5|Q96AE4|Q96AE4-2	Far upstream element-binding protein 1 OS=Homo sapiens GN=FUBP1 PE=1 SV=1|Far upstream element-binding protein 1 OS=Homo sapiens GN=FUBP1 PE=1 SV=3|Isoform 2 of Far upstream element-binding protein 1 OS=Homo sapiens GN=FUBP1	1	4	3	3	5.92129	2.32456	20.8977	10.473	3.18078e-06	6.60062e-06	5.01915	0.991771	1	1	WT - Control	limma	3.18078e-06	6.60062e-06	TRUE	hit	5.92129
1107	DOCK7	H0Y7L2|Q96N67|Q96N67-2|Q96N67-3|Q96N67-4|Q96N67-5|Q96N67-6	Dedicator of cytokinesis protein 7 OS=Homo sapiens GN=DOCK7 PE=1 SV=2|Dedicator of cytokinesis protein 7 OS=Homo sapiens GN=DOCK7 PE=1 SV=4|Isoform 2 of Dedicator of cytokinesis protein 7 OS=Homo sapiens GN=DOCK7|Isoform 3 of Dedicator of cytokinesis protein 7 OS=Homo sapiens GN=DOCK7|Isoform 4 of Dedicator of cytokinesis protein 7 OS=Homo sapiens GN=DOCK7|Isoform 5 of Dedicator of cytokinesis pr…	1	4	3	7	6.30048	1.89419	22.4183	10.4561	3.22286e-06	6.68183e-06	5.00525	0.991784	1	1	WT - Control	limma	3.22286e-06	6.68183e-06	TRUE	hit	6.30048
1108	MLST8	A0A0A0MR05|H3BSZ4|Q9BVC4	Target of rapamycin complex subunit LST8 OS=Homo sapiens GN=MLST8 PE=1 SV=1|Target of rapamycin complex subunit LST8 (Fragment) OS=Homo sapiens GN=MLST8 PE=1 SV=1|Target of rapamycin complex subunit LST8 OS=Homo sapiens GN=MLST8 PE=1 SV=1	1	4	3	4	6.45836	3.9962	20.756	10.4539	3.22823e-06	6.68684e-06	5.00349	0.991786	1	1	WT - Control	limma	3.22823e-06	6.68684e-06	TRUE	hit	6.45836
1109	GFM2	Q969S9|Q969S9-2|Q969S9-3|Q969S9-4|Q969S9-5	Ribosome-releasing factor 2, mitochondrial OS=Homo sapiens GN=GFM2 PE=1 SV=1|Isoform 2 of Ribosome-releasing factor 2, mitochondrial OS=Homo sapiens GN=GFM2|Isoform 3 of Ribosome-releasing factor 2, mitochondrial OS=Homo sapiens GN=GFM2|Isoform 4 of Ribosome-releasing factor 2, mitochondrial OS=Homo sapiens GN=GFM2|Isoform 5 of Ribosome-releasing factor 2, mitochondrial OS=Homo sapiens GN=GFM2	1	4	3	2	6.05675	2.15795	20.0231	10.4499	3.23851e-06	6.702e-06	5.00013	0.991789	1	1	WT - Control	limma	3.23851e-06	6.702e-06	TRUE	hit	6.05675
1110	ZNF146	Q15072	Zinc finger protein OZF OS=Homo sapiens GN=ZNF146 PE=1 SV=2	1	4	3	3	6.04714	2.07784	21.9896	10.4485	3.2419e-06	6.70289e-06	4.99902	0.99179	1	1	WT - Control	limma	3.2419e-06	6.70289e-06	TRUE	hit	6.04714
1111	KIRREL	Q96J84|Q96J84-2	Kin of IRRE-like protein 1 OS=Homo sapiens GN=KIRREL PE=1 SV=2|Isoform 2 of Kin of IRRE-like protein 1 OS=Homo sapiens GN=KIRREL	1	4	3	4	5.83397	3.03447	20.5071	10.441	3.26074e-06	6.73569e-06	4.99289	0.991796	1	1	WT - Control	limma	3.26074e-06	6.73569e-06	TRUE	hit	5.83397
1112	PSMA5	P28066	Proteasome subunit alpha type-5 OS=Homo sapiens GN=PSMA5 PE=1 SV=3	1	4	3	2	5.9772	2.63922	19.8958	10.42	3.31457e-06	6.8344e-06	4.97557	0.991813	1	1	WT - Control	limma	3.31457e-06	6.8344e-06	TRUE	hit	5.9772
1113	HEMK1	Q9Y5R4	HemK methyltransferase family member 1 OS=Homo sapiens GN=HEMK1 PE=1 SV=1	1	4	3	2	5.84188	2.30568	19.7646	10.4037	3.35703e-06	6.90938e-06	4.9621	0.991825	1	1	WT - Control	limma	3.35703e-06	6.90938e-06	TRUE	hit	5.84188
1114	DNAAF5	Q86Y56	Dynein assembly factor 5, axonemal OS=Homo sapiens GN=DNAAF5 PE=1 SV=4	1	4	3	4	6.69486	4.18512	21.7456	10.3981	3.37148e-06	6.93281e-06	4.95756	0.99183	1	1	WT - Control	limma	3.37148e-06	6.93281e-06	TRUE	hit	6.69486
1115	JUP	P14923	Junction plakoglobin OS=Homo sapiens GN=JUP PE=1 SV=3	1	4	3	5	5.94157	2.35141	21.6614	10.3919	3.38798e-06	6.95701e-06	4.95239	0.991835	1	1	WT - Control	limma	3.38798e-06	6.95701e-06	TRUE	hit	5.94157
1116	EXOC7	A0A0A0MSB8|Q9UPT5|Q9UPT5-1|Q9UPT5-2|Q9UPT5-5|Q9UPT5-6	Exocyst complex component 7 OS=Homo sapiens GN=EXOC7 PE=1 SV=1|Exocyst complex component 7 OS=Homo sapiens GN=EXOC7 PE=1 SV=3|Isoform 1 of Exocyst complex component 7 OS=Homo sapiens GN=EXOC7|Isoform 2 of Exocyst complex component 7 OS=Homo sapiens GN=EXOC7|Isoform 5 of Exocyst complex component 7 OS=Homo sapiens GN=EXOC7|Isoform 6 of Exocyst complex component 7 OS=Homo sapiens GN=EXOC7	1	4	3	3	6.03591	2.53473	21.2809	10.3914	3.38939e-06	6.95701e-06	4.95195	0.991835	1	1	WT - Control	limma	3.38939e-06	6.95701e-06	TRUE	hit	6.03591
1117	DHTKD1	Q96HY7	Probable 2-oxoglutarate dehydrogenase E1 component DHKTD1, mitochondrial OS=Homo sapiens GN=DHTKD1 PE=1 SV=2	1	4	3	2	5.9891	2.24583	20.5029	10.3859	3.40391e-06	6.98049e-06	4.94743	0.991839	1	1	WT - Control	limma	3.40391e-06	6.98049e-06	TRUE	hit	5.9891
1118	STIL	A0A0A0MR87|E9PSF2|Q15468|Q15468-2	SCL-interrupting locus protein OS=Homo sapiens GN=STIL PE=1 SV=1|SCL-interrupting locus protein OS=Homo sapiens GN=STIL PE=1 SV=1|SCL-interrupting locus protein OS=Homo sapiens GN=STIL PE=1 SV=2|Isoform 2 of SCL-interrupting locus protein OS=Homo sapiens GN=STIL	1	4	3	5	6.0338	2.82567	21.3784	10.3833	3.41087e-06	6.98843e-06	4.94527	0.991841	1	1	WT - Control	limma	3.41087e-06	6.98843e-06	TRUE	hit	6.0338
1119	HSPA9	P38646	Stress-70 protein, mitochondrial OS=Homo sapiens GN=HSPA9 PE=1 SV=2	1	4	3	18	7.64889	1.79675	25.0806	10.3791	3.42184e-06	7.00457e-06	4.94187	0.991845	1	1	WT - Control	limma	3.42184e-06	7.00457e-06	TRUE	hit	7.64889
1120	ZNF536	O15090	Zinc finger protein 536 OS=Homo sapiens GN=ZNF536 PE=1 SV=3	1	4	3	3	5.78503	2.50626	20.1549	10.3744	3.43446e-06	7.02386e-06	4.93798	0.991848	1	1	WT - Control	limma	3.43446e-06	7.02386e-06	TRUE	hit	5.78503
1121	C17ORF80	I3L072|Q9BSJ5|Q9BSJ5-2|Q9BSJ5-3	Uncharacterized protein C17orf80 OS=Homo sapiens GN=C17orf80 PE=1 SV=1|Uncharacterized protein C17orf80 OS=Homo sapiens GN=C17orf80 PE=2 SV=2|Isoform 2 of Uncharacterized protein C17orf80 OS=Homo sapiens GN=C17orf80|Isoform 3 of Uncharacterized protein C17orf80 OS=Homo sapiens GN=C17orf80	1	4	3	4	5.63611	2.06943	20.8351	10.3726	3.43941e-06	7.02386e-06	4.93645	0.99185	1	1	WT - Control	limma	3.43941e-06	7.02386e-06	TRUE	hit	5.63611
1122	MED12	Q93074-2	Isoform 2 of Mediator of RNA polymerase II transcription subunit 12 OS=Homo sapiens GN=MED12	1	4	3	5	5.82373	2.9854	20.94	10.3722	3.44057e-06	7.02386e-06	4.93609	0.99185	1	1	WT - Control	limma	3.44057e-06	7.02386e-06	TRUE	hit	5.82373
1123	IDI1	Q13907|Q13907-2	Isopentenyl-diphosphate Delta-isomerase 1 OS=Homo sapiens GN=IDI1 PE=1 SV=2|Isoform 2 of Isopentenyl-diphosphate Delta-isomerase 1 OS=Homo sapiens GN=IDI1	1	4	3	2	6.36686	3.15889	19.7586	10.3663	8.60763e-06	1.51773e-05	4.19867	0.991855	1	1	WT - Control	limma	8.60763e-06	1.51773e-05	TRUE	hit	6.36686
1124	TBCD	J3KR97|Q9BTW9|Q9BTW9-4|Q9BTW9-5	Tubulin-specific chaperone D OS=Homo sapiens GN=TBCD PE=1 SV=1|Tubulin-specific chaperone D OS=Homo sapiens GN=TBCD PE=1 SV=2|Isoform 4 of Tubulin-specific chaperone D OS=Homo sapiens GN=TBCD|Isoform 5 of Tubulin-specific chaperone D OS=Homo sapiens GN=TBCD	1	4	3	6	6.46265	2.43377	22.2157	10.3612	3.47027e-06	7.0781e-06	4.927	0.991859	1	1	WT - Control	limma	3.47027e-06	7.0781e-06	TRUE	hit	6.46265
1125	CBX4	O00257	E3 SUMO-protein ligase CBX4 OS=Homo sapiens GN=CBX4 PE=1 SV=3	1	4	3	3	5.94311	2.71635	20.3064	10.3592	3.47565e-06	7.08269e-06	4.92536	0.99186	1	1	WT - Control	limma	3.47565e-06	7.08269e-06	TRUE	hit	5.94311
1126	CYP51A1	A0A0C4DFL7|Q16850	Lanosterol 14-alpha demethylase OS=Homo sapiens GN=CYP51A1 PE=1 SV=1|Lanosterol 14-alpha demethylase OS=Homo sapiens GN=CYP51A1 PE=1 SV=3	1	4	3	3	5.69105	3.06615	20.4961	10.341	3.52553e-06	7.17318e-06	4.91028	0.991875	1	1	WT - Control	limma	3.52553e-06	7.17318e-06	TRUE	hit	5.69105
1127	RAB1B	Q9H0U4	Ras-related protein Rab-1B OS=Homo sapiens GN=RAB1B PE=1 SV=1	1	4	3	4	6.24199	2.26677	22.2124	10.3407	3.52639e-06	7.17318e-06	4.91002	0.991875	1	1	WT - Control	limma	3.52639e-06	7.17318e-06	TRUE	hit	6.24199
1128	ADAM15	Q13444|Q13444-10|Q13444-12|Q13444-2|Q13444-3|Q13444-4|Q13444-5|Q13444-6|Q13444-7|Q13444-8|Q13444-9	Disintegrin and metalloproteinase domain-containing protein 15 OS=Homo sapiens GN=ADAM15 PE=1 SV=4|Isoform 10 of Disintegrin and metalloproteinase domain-containing protein 15 OS=Homo sapiens GN=ADAM15|Isoform 12 of Disintegrin and metalloproteinase domain-containing protein 15 OS=Homo sapiens GN=ADAM15|Isoform 2 of Disintegrin and metalloproteinase domain-containing protein 15 OS=Homo sapiens GN…	1	4	3	5	6.16369	4.09446	21.5385	10.3333	3.54682e-06	7.20826e-06	4.9039	0.991881	1	1	WT - Control	limma	3.54682e-06	7.20826e-06	TRUE	hit	6.16369
1129	TRAPPC9	Q96Q05|Q96Q05-2|Q96Q05-3	Trafficking protein particle complex subunit 9 OS=Homo sapiens GN=TRAPPC9 PE=1 SV=2|Isoform 2 of Trafficking protein particle complex subunit 9 OS=Homo sapiens GN=TRAPPC9|Isoform 3 of Trafficking protein particle complex subunit 9 OS=Homo sapiens GN=TRAPPC9	1	4	3	2	5.93093	2.35738	19.9513	10.3319	8.8172e-06	1.54986e-05	4.17337	0.991882	1	1	WT - Control	limma	8.8172e-06	1.54986e-05	TRUE	hit	5.93093
1130	GAS6	Q14393|Q14393-2|Q14393-3|Q14393-4|Q14393-5	Growth arrest-specific protein 6 OS=Homo sapiens GN=GAS6 PE=1 SV=2|Isoform 2 of Growth arrest-specific protein 6 OS=Homo sapiens GN=GAS6|Isoform 3 of Growth arrest-specific protein 6 OS=Homo sapiens GN=GAS6|Isoform 4 of Growth arrest-specific protein 6 OS=Homo sapiens GN=GAS6|Isoform 5 of Growth arrest-specific protein 6 OS=Homo sapiens GN=GAS6	1	4	3	3	6.23453	3.33361	20.9469	10.3312	3.55258e-06	7.21329e-06	4.90219	0.991882	1	1	WT - Control	limma	3.55258e-06	7.21329e-06	TRUE	hit	6.23453
1131	QSER1	Q2KHR3|Q2KHR3-2	Glutamine and serine-rich protein 1 OS=Homo sapiens GN=QSER1 PE=1 SV=3|Isoform 2 of Glutamine and serine-rich protein 1 OS=Homo sapiens GN=QSER1	1	4	3	3	5.86219	2.49687	20.5984	10.3301	3.55567e-06	7.21329e-06	4.90127	0.991883	1	1	WT - Control	limma	3.55567e-06	7.21329e-06	TRUE	hit	5.86219
1132	ITPRIPL2	Q3MIP1	Inositol 1,4,5-trisphosphate receptor-interacting protein-like 2 OS=Homo sapiens GN=ITPRIPL2 PE=1 SV=1	1	4	3	2	6.35525	2.83952	20.8271	10.3264	8.85092e-06	1.55458e-05	4.23976	0.991886	1	1	WT - Control	limma	8.85092e-06	1.55458e-05	TRUE	hit	6.35525
1133	BAG2	O95816	BAG family molecular chaperone regulator 2 OS=Homo sapiens GN=BAG2 PE=1 SV=1	1	4	3	2	6.26272	2.40326	20.9491	10.3121	3.60622e-06	7.30929e-06	4.88632	0.991897	1	1	WT - Control	limma	3.60622e-06	7.30929e-06	TRUE	hit	6.26272
1134	ERBB2	B4DTR1|P04626|P04626-2|P04626-3|P04626-4|P04626-5	Receptor protein-tyrosine kinase OS=Homo sapiens GN=ERBB2 PE=1 SV=1|Receptor tyrosine-protein kinase erbB-2 OS=Homo sapiens GN=ERBB2 PE=1 SV=1|Isoform 2 of Receptor tyrosine-protein kinase erbB-2 OS=Homo sapiens GN=ERBB2|Isoform 3 of Receptor tyrosine-protein kinase erbB-2 OS=Homo sapiens GN=ERBB2|Isoform 4 of Receptor tyrosine-protein kinase erbB-2 OS=Homo sapiens GN=ERBB2|Isoform 5 of Receptor …	1	4	3	3	6.23844	2.62676	21.1736	10.2965	3.65073e-06	7.38628e-06	4.87333	0.99191	1	1	WT - Control	limma	3.65073e-06	7.38628e-06	TRUE	hit	6.23844
1135	REEP4	E5RGS2|Q9H6H4	Receptor expression-enhancing protein OS=Homo sapiens GN=REEP4 PE=1 SV=1|Receptor expression-enhancing protein 4 OS=Homo sapiens GN=REEP4 PE=1 SV=1	1	4	3	2	6.03295	2.2488	20.162	10.278	3.70427e-06	7.4871e-06	4.85792	0.991924	1	1	WT - Control	limma	3.70427e-06	7.4871e-06	TRUE	hit	6.03295
1136	PDE4D	Q08499-6	Isoform 5 of cAMP-specific 3',5'-cyclic phosphodiesterase 4D OS=Homo sapiens GN=PDE4D	1	4	3	2	5.86903	2.39559	19.7419	10.277	3.70717e-06	7.4871e-06	4.85709	0.991925	1	1	WT - Control	limma	3.70717e-06	7.4871e-06	TRUE	hit	5.86903
1137	NCAPH	E9PHA2|Q15003	Condensin complex subunit 2 OS=Homo sapiens GN=NCAPH PE=1 SV=1|Condensin complex subunit 2 OS=Homo sapiens GN=NCAPH PE=1 SV=3	1	4	3	6	6.29706	2.01968	21.9949	10.2752	3.71269e-06	7.488e-06	4.85551	0.991926	1	1	WT - Control	limma	3.71269e-06	7.488e-06	TRUE	hit	6.29706
1138	DDX24	G3V529|Q9GZR7	ATP-dependent RNA helicase DDX24 OS=Homo sapiens GN=DDX24 PE=1 SV=1|ATP-dependent RNA helicase DDX24 OS=Homo sapiens GN=DDX24 PE=1 SV=1	1	4	3	5	6.06059	1.87384	21.4081	10.2746	3.71423e-06	7.488e-06	4.85507	0.991927	1	1	WT - Control	limma	3.71423e-06	7.488e-06	TRUE	hit	6.06059
1139	SURF4	O15260|Q5T8U5	Surfeit locus protein 4 OS=Homo sapiens GN=SURF4 PE=1 SV=3|Surfeit 4 OS=Homo sapiens GN=SURF4 PE=1 SV=1	1	4	3	3	6.31961	4.03389	21.558	10.2704	3.72671e-06	7.50647e-06	4.85152	0.99193	1	1	WT - Control	limma	3.72671e-06	7.50647e-06	TRUE	hit	6.31961
1140	USO1	O60763|O60763-2	General vesicular transport factor p115 OS=Homo sapiens GN=USO1 PE=1 SV=2|Isoform 2 of General vesicular transport factor p115 OS=Homo sapiens GN=USO1	1	4	3	7	5.94492	2.08118	21.728	10.2687	3.73157e-06	7.50957e-06	4.85014	0.991931	1	1	WT - Control	limma	3.73157e-06	7.50957e-06	TRUE	hit	5.94492
1141	VPS53	Q5VIR6-4	Isoform 4 of Vacuolar protein sorting-associated protein 53 homolog OS=Homo sapiens GN=VPS53	1	4	3	4	6.17771	2.46684	20.6195	10.2627	3.74926e-06	7.53847e-06	4.84513	0.991936	1	1	WT - Control	limma	3.74926e-06	7.53847e-06	TRUE	hit	6.17771
1142	MAP7	A0A087WZ40|Q14244|Q14244-6|Q14244-7	Ensconsin OS=Homo sapiens GN=MAP7 PE=1 SV=1|Ensconsin OS=Homo sapiens GN=MAP7 PE=1 SV=1|Isoform 6 of Ensconsin OS=Homo sapiens GN=MAP7|Isoform 7 of Ensconsin OS=Homo sapiens GN=MAP7	1	4	3	3	6.32596	2.09565	19.7785	10.256	3.76921e-06	7.57186e-06	4.83951	0.991941	1	1	WT - Control	limma	3.76921e-06	7.57186e-06	TRUE	hit	6.32596
1143	RPS26	P62854	40S ribosomal protein S26 OS=Homo sapiens GN=RPS26 PE=1 SV=3	1	4	3	4	7.30436	2.0906	22.8209	10.2362	3.82848e-06	7.68412e-06	4.82299	0.991957	1	1	WT - Control	limma	3.82848e-06	7.68412e-06	TRUE	hit	7.30436
1144	FASTKD1	Q53R41	FAST kinase domain-containing protein 1, mitochondrial OS=Homo sapiens GN=FASTKD1 PE=1 SV=1	1	4	3	4	5.82856	3.1072	20.4852	10.2342	3.83457e-06	7.68952e-06	4.82131	0.991959	1	1	WT - Control	limma	3.83457e-06	7.68952e-06	TRUE	hit	5.82856
1145	COLEC12	Q5KU26	Collectin-12 OS=Homo sapiens GN=COLEC12 PE=1 SV=3	1	4	3	4	6.1364	3.1612	20.9236	10.2255	3.86113e-06	7.73171e-06	4.814	0.991965	1	1	WT - Control	limma	3.86113e-06	7.73171e-06	TRUE	hit	6.1364
1146	KTN1	Q86UP2|Q86UP2-2|Q86UP2-4	Kinectin OS=Homo sapiens GN=KTN1 PE=1 SV=1|Isoform 2 of Kinectin OS=Homo sapiens GN=KTN1|Isoform 4 of Kinectin OS=Homo sapiens GN=KTN1	1	4	3	4	5.8027	2.43274	21.1718	10.2231	3.86849e-06	7.73698e-06	4.81198	0.991967	1	1	WT - Control	limma	3.86849e-06	7.73698e-06	TRUE	hit	5.8027
1147	PHB2	Q99623|Q99623-2	Prohibitin-2 OS=Homo sapiens GN=PHB2 PE=1 SV=2|Isoform 2 of Prohibitin-2 OS=Homo sapiens GN=PHB2	1	4	3	9	6.84517	2.58976	23.9063	10.2153	3.89237e-06	7.77787e-06	4.80546	0.991973	1	1	WT - Control	limma	3.89237e-06	7.77787e-06	TRUE	hit	6.84517
1148	TBK1	Q9UHD2	Serine/threonine-protein kinase TBK1 OS=Homo sapiens GN=TBK1 PE=1 SV=1	1	4	3	5	5.6909	1.95998	20.5315	10.1983	3.94523e-06	7.87655e-06	4.79117	0.991987	1	1	WT - Control	limma	3.94523e-06	7.87655e-06	TRUE	hit	5.6909
1149	UFL1	O94874	E3 UFM1-protein ligase 1 OS=Homo sapiens GN=UFL1 PE=1 SV=2	1	4	3	6	5.95057	2.76415	21.9966	10.1935	3.96044e-06	7.89994e-06	4.78709	0.991991	1	1	WT - Control	limma	3.96044e-06	7.89994e-06	TRUE	hit	5.95057
1150	RPS20	P60866|P60866-2	40S ribosomal protein S20 OS=Homo sapiens GN=RPS20 PE=1 SV=1|Isoform 2 of 40S ribosomal protein S20 OS=Homo sapiens GN=RPS20	1	4	3	4	7.02997	2.41186	22.786	10.186	3.98379e-06	7.93952e-06	4.78086	0.991996	1	1	WT - Control	limma	3.98379e-06	7.93952e-06	TRUE	hit	7.02997
1151	NCAPD2	Q15021	Condensin complex subunit 1 OS=Homo sapiens GN=NCAPD2 PE=1 SV=3	1	4	3	7	6.24978	2.64637	22.3727	10.1764	4.01432e-06	7.98828e-06	4.77277	0.992004	1	1	WT - Control	limma	4.01432e-06	7.98828e-06	TRUE	hit	6.24978
1152	CHID1	Q9BWS9|Q9BWS9-2|Q9BWS9-3	Chitinase domain-containing protein 1 OS=Homo sapiens GN=CHID1 PE=1 SV=1|Isoform 2 of Chitinase domain-containing protein 1 OS=Homo sapiens GN=CHID1|Isoform 3 of Chitinase domain-containing protein 1 OS=Homo sapiens GN=CHID1	1	4	3	3	5.75437	2.56362	20.8022	10.1761	4.01531e-06	7.98828e-06	4.77251	0.992004	1	1	WT - Control	limma	4.01531e-06	7.98828e-06	TRUE	hit	5.75437
1153	METTL13	Q8N6R0|Q8N6R0-1|Q8N6R0-4	Methyltransferase-like protein 13 OS=Homo sapiens GN=METTL13 PE=1 SV=1|Isoform 4 of Methyltransferase-like protein 13 OS=Homo sapiens GN=METTL13|Isoform 2 of Methyltransferase-like protein 13 OS=Homo sapiens GN=METTL13	1	4	3	4	6.24496	3.32499	20.9662	10.1747	4.01997e-06	7.99052e-06	4.77129	0.992005	1	1	WT - Control	limma	4.01997e-06	7.99052e-06	TRUE	hit	6.24496
1154	BCS1L	Q9Y276	Mitochondrial chaperone BCS1 OS=Homo sapiens GN=BCS1L PE=1 SV=1	1	4	3	5	5.87387	1.84279	20.8929	10.1641	4.05393e-06	8.05096e-06	4.76237	0.992014	1	1	WT - Control	limma	4.05393e-06	8.05096e-06	TRUE	hit	5.87387
1155	PRIM1	F8VNY2|P49642	DNA primase (Fragment) OS=Homo sapiens GN=PRIM1 PE=1 SV=7|DNA primase small subunit OS=Homo sapiens GN=PRIM1 PE=1 SV=1	1	4	3	2	5.56014	2.02161	19.7922	10.1604	4.06567e-06	8.0672e-06	4.75931	0.992016	1	1	WT - Control	limma	4.06567e-06	8.0672e-06	TRUE	hit	5.56014
1156	QARS	P47897|P47897-2	Glutamine--tRNA ligase OS=Homo sapiens GN=QARS PE=1 SV=1|Isoform 2 of Glutamine--tRNA ligase OS=Homo sapiens GN=QARS	1	4	3	4	6.29819	1.90854	20.6517	10.1408	4.12973e-06	8.18713e-06	4.74274	0.992032	1	1	WT - Control	limma	4.12973e-06	8.18713e-06	TRUE	hit	6.29819
1157	CPSF1	Q10570	Cleavage and polyadenylation specificity factor subunit 1 OS=Homo sapiens GN=CPSF1 PE=1 SV=2	1	4	3	5	6.17516	1.93842	20.9343	10.1324	4.15739e-06	8.23476e-06	4.73566	0.992039	1	1	WT - Control	limma	4.15739e-06	8.23476e-06	TRUE	hit	6.17516
1158	COPG1	Q9Y678	Coatomer subunit gamma-1 OS=Homo sapiens GN=COPG1 PE=1 SV=1	1	4	3	4	6.24556	2.54625	20.8209	10.1309	4.16246e-06	8.23759e-06	4.73437	0.99204	1	1	WT - Control	limma	4.16246e-06	8.23759e-06	TRUE	hit	6.24556
1159	TRMT1L	Q7Z2T5	TRMT1-like protein OS=Homo sapiens GN=TRMT1L PE=1 SV=2	1	4	3	3	6.05703	1.73082	21.2267	10.1266	4.17662e-06	8.25841e-06	4.73077	0.992043	1	1	WT - Control	limma	4.17662e-06	8.25841e-06	TRUE	hit	6.05703
1160	WDR7	Q9Y4E6|Q9Y4E6-2	WD repeat-containing protein 7 OS=Homo sapiens GN=WDR7 PE=1 SV=2|Isoform 2 of WD repeat-containing protein 7 OS=Homo sapiens GN=WDR7	1	4	3	3	5.8096	2.24177	19.8632	10.1113	1.0304e-05	1.77266e-05	4.00926	0.992055	1	1	WT - Control	limma	1.0304e-05	1.77266e-05	TRUE	hit	5.8096
1161	KIAA0100	K7EQ86|Q08E86|Q14667|Q14667-2	KIAA0100, isoform CRA_a OS=Homo sapiens GN=KIAA0100 PE=1 SV=1|KIAA0100 protein OS=Homo sapiens GN=KIAA0100 PE=1 SV=1|Protein KIAA0100 OS=Homo sapiens GN=KIAA0100 PE=1 SV=3|Isoform 2 of Protein KIAA0100 OS=Homo sapiens GN=KIAA0100	1	4	3	5	5.81645	3.30484	21.3973	10.1042	4.25216e-06	8.39652e-06	4.71177	0.992061	1	1	WT - Control	limma	4.25216e-06	8.39652e-06	TRUE	hit	5.81645
1162	PSMD4	H0Y3Y9|P55036|Q5VWC4	26S proteasome non-ATPase regulatory subunit 4 (Fragment) OS=Homo sapiens GN=PSMD4 PE=1 SV=1|26S proteasome non-ATPase regulatory subunit 4 OS=Homo sapiens GN=PSMD4 PE=1 SV=1|26S proteasome non-ATPase regulatory subunit 4 OS=Homo sapiens GN=PSMD4 PE=1 SV=1	1	4	3	2	6.0566	1.81823	20.5081	10.1032	4.25546e-06	8.39652e-06	4.71095	0.992061	1	1	WT - Control	limma	4.25546e-06	8.39652e-06	TRUE	hit	6.0566
1163	DYNC1I2	Q13409|Q13409-2|Q13409-3|Q13409-7	Cytoplasmic dynein 1 intermediate chain 2 OS=Homo sapiens GN=DYNC1I2 PE=1 SV=3|Isoform 2B of Cytoplasmic dynein 1 intermediate chain 2 OS=Homo sapiens GN=DYNC1I2|Isoform 2C of Cytoplasmic dynein 1 intermediate chain 2 OS=Homo sapiens GN=DYNC1I2|Isoform 3 of Cytoplasmic dynein 1 intermediate chain 2 OS=Homo sapiens GN=DYNC1I2	1	4	3	3	6.30891	2.01406	21.467	10.1026	4.2576e-06	8.39652e-06	4.71042	0.992062	1	1	WT - Control	limma	4.2576e-06	8.39652e-06	TRUE	hit	6.30891
1164	PFKL	P17858	ATP-dependent 6-phosphofructokinase, liver type OS=Homo sapiens GN=PFKL PE=1 SV=6	1	4	3	5	6.64866	3.36966	22.0195	10.1012	4.26239e-06	8.39865e-06	4.70923	0.992063	1	1	WT - Control	limma	4.26239e-06	8.39865e-06	TRUE	hit	6.64866
1165	ARFGEF1	Q9Y6D6	Brefeldin A-inhibited guanine nucleotide-exchange protein 1 OS=Homo sapiens GN=ARFGEF1 PE=1 SV=2	1	4	3	3	5.99922	2.98153	20.6942	10.0885	4.30605e-06	8.4773e-06	4.69842	0.992073	1	1	WT - Control	limma	4.30605e-06	8.4773e-06	TRUE	hit	5.99922
1166	PARG	Q86W56|Q86W56-2|Q86W56-3|Q86W56-4|Q86W56-5	Poly(ADP-ribose) glycohydrolase OS=Homo sapiens GN=PARG PE=1 SV=1|Isoform 2 of Poly(ADP-ribose) glycohydrolase OS=Homo sapiens GN=PARG|Isoform 3 of Poly(ADP-ribose) glycohydrolase OS=Homo sapiens GN=PARG|Isoform 4 of Poly(ADP-ribose) glycohydrolase OS=Homo sapiens GN=PARG|Isoform 5 of Poly(ADP-ribose) glycohydrolase OS=Homo sapiens GN=PARG	1	4	3	2	5.69607	1.80064	20.7504	10.0832	4.32406e-06	8.50535e-06	4.694	0.992077	1	1	WT - Control	limma	4.32406e-06	8.50535e-06	TRUE	hit	5.69607
1167	ZNF512	G3XAG1|Q96ME7|Q96ME7-2|Q96ME7-3	Zinc finger protein 512 OS=Homo sapiens GN=ZNF512 PE=1 SV=1|Zinc finger protein 512 OS=Homo sapiens GN=ZNF512 PE=1 SV=2|Isoform 2 of Zinc finger protein 512 OS=Homo sapiens GN=ZNF512|Isoform 3 of Zinc finger protein 512 OS=Homo sapiens GN=ZNF512	1	4	3	2	5.71772	1.73909	19.811	10.0636	4.39258e-06	8.62516e-06	4.67733	0.992093	1	1	WT - Control	limma	4.39258e-06	8.62516e-06	TRUE	hit	5.71772
1168	ATP5SL	Q9NW81|Q9NW81-4	ATP synthase subunit s-like protein OS=Homo sapiens GN=ATP5SL PE=1 SV=3|Isoform 4 of ATP synthase subunit s-like protein OS=Homo sapiens GN=ATP5SL	1	4	3	3	6.11504	3.61398	21.0481	10.0583	4.41143e-06	8.65463e-06	4.67279	0.992097	1	1	WT - Control	limma	4.41143e-06	8.65463e-06	TRUE	hit	6.11504
1169	JAG2	Q9Y219|Q9Y219-2	Protein jagged-2 OS=Homo sapiens GN=JAG2 PE=1 SV=3|Isoform Short of Protein jagged-2 OS=Homo sapiens GN=JAG2	1	4	3	3	6.05437	2.32062	20.7914	10.0572	4.41524e-06	8.65463e-06	4.67187	0.992098	1	1	WT - Control	limma	4.41524e-06	8.65463e-06	TRUE	hit	6.05437
1170	EXOC6	Q8TAG9|Q8TAG9-2	Exocyst complex component 6 OS=Homo sapiens GN=EXOC6 PE=1 SV=3|Isoform 2 of Exocyst complex component 6 OS=Homo sapiens GN=EXOC6	1	4	3	4	6.21871	2.41026	21.4482	10.0522	4.43317e-06	8.68226e-06	4.66757	0.992102	1	1	WT - Control	limma	4.43317e-06	8.68226e-06	TRUE	hit	6.21871
1171	HEXA	H3BP20|H3BS10|P06865	Beta-hexosaminidase OS=Homo sapiens GN=HEXA PE=1 SV=1|Beta-hexosaminidase OS=Homo sapiens GN=HEXA PE=1 SV=1|Beta-hexosaminidase subunit alpha OS=Homo sapiens GN=HEXA PE=1 SV=2	1	4	3	4	6.11817	3.29534	22.2445	10.051	4.4375e-06	8.68323e-06	4.66654	0.992103	1	1	WT - Control	limma	4.4375e-06	8.68323e-06	TRUE	hit	6.11817
1172	NAA10	P41227|P41227-2	N-alpha-acetyltransferase 10 OS=Homo sapiens GN=NAA10 PE=1 SV=1|Isoform 2 of N-alpha-acetyltransferase 10 OS=Homo sapiens GN=NAA10	1	4	3	2	6.64968	2.32989	21.139	10.0202	4.54846e-06	8.89266e-06	4.64035	0.992127	1	1	WT - Control	limma	4.54846e-06	8.89266e-06	TRUE	hit	6.64968
1173	PRKAR2A	P13861	cAMP-dependent protein kinase type II-alpha regulatory subunit OS=Homo sapiens GN=PRKAR2A PE=1 SV=2	1	4	3	2	5.88964	2.10055	21.5417	10.0178	4.55737e-06	8.89787e-06	4.63827	0.992129	1	1	WT - Control	limma	4.55737e-06	8.89787e-06	TRUE	hit	5.88964
1174	VRK2	Q86Y07|Q86Y07-3|Q86Y07-4	Serine/threonine-protein kinase VRK2 OS=Homo sapiens GN=VRK2 PE=1 SV=3|Isoform 3 of Serine/threonine-protein kinase VRK2 OS=Homo sapiens GN=VRK2|Isoform 4 of Serine/threonine-protein kinase VRK2 OS=Homo sapiens GN=VRK2	1	4	3	2	6.08734	2.12538	19.8643	10.0169	4.56063e-06	8.89787e-06	4.63751	0.992129	1	1	WT - Control	limma	4.56063e-06	8.89787e-06	TRUE	hit	6.08734
1175	RABGAP1	Q9Y3P9	Rab GTPase-activating protein 1 OS=Homo sapiens GN=RABGAP1 PE=1 SV=3	1	4	3	2	5.42136	2.22968	19.6926	10.0163	4.56291e-06	8.89787e-06	4.63698	0.99213	1	1	WT - Control	limma	4.56291e-06	8.89787e-06	TRUE	hit	5.42136
1176	PDHA1	P08559|P08559-2|P08559-3|P08559-4	Pyruvate dehydrogenase E1 component subunit alpha, somatic form, mitochondrial OS=Homo sapiens GN=PDHA1 PE=1 SV=3|Isoform 2 of Pyruvate dehydrogenase E1 component subunit alpha, somatic form, mitochondrial OS=Homo sapiens GN=PDHA1|Isoform 3 of Pyruvate dehydrogenase E1 component subunit alpha, somatic form, mitochondrial OS=Homo sapiens GN=PDHA1|Isoform 4 of Pyruvate dehydrogenase E1 component su…	1	4	3	9	7.1617	2.19982	22.6868	10.0138	4.57202e-06	8.90797e-06	4.63487	0.992132	1	1	WT - Control	limma	4.57202e-06	8.90797e-06	TRUE	hit	7.1617
1177	INTS8	H0YBS1|Q75QN2|Q75QN2-2	Integrator complex subunit 8 (Fragment) OS=Homo sapiens GN=INTS8 PE=1 SV=1|Integrator complex subunit 8 OS=Homo sapiens GN=INTS8 PE=1 SV=1|Isoform 2 of Integrator complex subunit 8 OS=Homo sapiens GN=INTS8	1	4	3	3	5.8403	2.89184	20.3004	10.0124	4.57727e-06	8.91052e-06	4.63365	0.992133	1	1	WT - Control	limma	4.57727e-06	8.91052e-06	TRUE	hit	5.8403
1178	AHCTF1	Q8WYP5|Q8WYP5-2|Q8WYP5-3	Protein ELYS OS=Homo sapiens GN=AHCTF1 PE=1 SV=3|Isoform 2 of Protein ELYS OS=Homo sapiens GN=AHCTF1|Isoform 3 of Protein ELYS OS=Homo sapiens GN=AHCTF1	1	4	3	3	5.74111	2.50126	20.0324	10.0106	1.1075e-05	1.881e-05	3.93315	0.992134	1	1	WT - Control	limma	1.1075e-05	1.881e-05	TRUE	hit	5.74111
1179	ARID3A	Q99856	AT-rich interactive domain-containing protein 3A OS=Homo sapiens GN=ARID3A PE=1 SV=2	1	4	3	2	5.85384	2.31917	19.927	10.0092	4.58897e-06	8.92563e-06	4.63094	0.992135	1	1	WT - Control	limma	4.58897e-06	8.92563e-06	TRUE	hit	5.85384
1180	RUFY1	H0YA47|Q96T51|Q96T51-2	RUN and FYVE domain-containing protein 1 (Fragment) OS=Homo sapiens GN=RUFY1 PE=1 SV=1|RUN and FYVE domain-containing protein 1 OS=Homo sapiens GN=RUFY1 PE=1 SV=2|Isoform 2 of RUN and FYVE domain-containing protein 1 OS=Homo sapiens GN=RUFY1	1	4	3	5	6.02595	1.92034	21.7162	10.0032	4.61148e-06	8.96172e-06	4.62575	0.99214	1	1	WT - Control	limma	4.61148e-06	8.96172e-06	TRUE	hit	6.02595
1181	AVL9	B8ZZW5|H7C0I1|Q8NBF6|Q8NBF6-2	Late secretory pathway protein AVL9 homolog OS=Homo sapiens GN=AVL9 PE=1 SV=1|Late secretory pathway protein AVL9 homolog (Fragment) OS=Homo sapiens GN=AVL9 PE=1 SV=1|Late secretory pathway protein AVL9 homolog OS=Homo sapiens GN=AVL9 PE=1 SV=1|Isoform 2 of Late secretory pathway protein AVL9 homolog OS=Homo sapiens GN=AVL9	1	4	3	2	5.72032	2.71809	20.1573	9.99649	1.11882e-05	1.89596e-05	3.92242	0.992145	1	1	WT - Control	limma	1.11882e-05	1.89596e-05	TRUE	hit	5.72032
1182	POLR1B	Q9H9Y6|Q9H9Y6-2|Q9H9Y6-3	DNA-directed RNA polymerase I subunit RPA2 OS=Homo sapiens GN=POLR1B PE=1 SV=2|Isoform 2 of DNA-directed RNA polymerase I subunit RPA2 OS=Homo sapiens GN=POLR1B|Isoform 3 of DNA-directed RNA polymerase I subunit RPA2 OS=Homo sapiens GN=POLR1B	1	4	3	4	6.06368	1.98448	20.7811	9.99222	4.65236e-06	9.02565e-06	4.61639	0.992149	1	1	WT - Control	limma	4.65236e-06	9.02565e-06	TRUE	hit	6.06368
1183	ACADM	B7Z9I1|P11310|P11310-2|Q5T4U5	Medium-chain-specific acyl-CoA dehydrogenase, mitochondrial OS=Homo sapiens GN=ACADM PE=1 SV=1|Medium-chain specific acyl-CoA dehydrogenase, mitochondrial OS=Homo sapiens GN=ACADM PE=1 SV=1|Isoform 2 of Medium-chain specific acyl-CoA dehydrogenase, mitochondrial OS=Homo sapiens GN=ACADM|Acyl-Coenzyme A dehydrogenase, C-4 to C-12 straight chain, isoform CRA_a OS=Homo sapiens GN=ACADM PE=1 SV=1	1	4	3	5	6.48489	2.07294	22.2299	9.98836	4.66686e-06	9.04605e-06	4.61309	0.992152	1	1	WT - Control	limma	4.66686e-06	9.04605e-06	TRUE	hit	6.48489
1184	YY1AP1	B0QZ55|Q9H869-2|Q9H869-3|Q9H869-5|Q9H869-9	YY1-associated protein 1 OS=Homo sapiens GN=YY1AP1 PE=1 SV=1|Isoform 2 of YY1-associated protein 1 OS=Homo sapiens GN=YY1AP1|Isoform 3 of YY1-associated protein 1 OS=Homo sapiens GN=YY1AP1|Isoform 5 of YY1-associated protein 1 OS=Homo sapiens GN=YY1AP1|Isoform 9 of YY1-associated protein 1 OS=Homo sapiens GN=YY1AP1	1	4	3	2	5.67288	2.31433	19.941	9.98623	4.6749e-06	9.05386e-06	4.61127	0.992153	1	1	WT - Control	limma	4.6749e-06	9.05386e-06	TRUE	hit	5.67288
1185	IGF2BP2	F8W930|Q9Y6M1|Q9Y6M1-1	Insulin-like growth factor 2 mRNA-binding protein 2 OS=Homo sapiens GN=IGF2BP2 PE=1 SV=1|Insulin-like growth factor 2 mRNA-binding protein 2 OS=Homo sapiens GN=IGF2BP2 PE=1 SV=2|Isoform 2 of Insulin-like growth factor 2 mRNA-binding protein 2 OS=Homo sapiens GN=IGF2BP2	1	4	3	3	5.84036	2.19717	20.6956	9.98018	4.69782e-06	9.09048e-06	4.60608	0.992158	1	1	WT - Control	limma	4.69782e-06	9.09048e-06	TRUE	hit	5.84036
1186	DMXL2	Q8TDJ6|Q8TDJ6-3	DmX-like protein 2 OS=Homo sapiens GN=DMXL2 PE=1 SV=2|Isoform 3 of DmX-like protein 2 OS=Homo sapiens GN=DMXL2	1	4	3	4	5.65132	3.28073	20.8479	9.97667	4.71113e-06	9.10486e-06	4.60308	0.992161	1	1	WT - Control	limma	4.71113e-06	9.10486e-06	TRUE	hit	5.65132
1187	RPL28	P46779	60S ribosomal protein L28 OS=Homo sapiens GN=RPL28 PE=1 SV=3	1	4	3	5	7.34643	1.84523	22.9936	9.97611	4.71329e-06	9.10486e-06	4.60259	0.992161	1	1	WT - Control	limma	4.71329e-06	9.10486e-06	TRUE	hit	7.34643
1188	PRPSAP1	Q14558|Q14558-2	Phosphoribosyl pyrophosphate synthase-associated protein 1 OS=Homo sapiens GN=PRPSAP1 PE=1 SV=2|Isoform 2 of Phosphoribosyl pyrophosphate synthase-associated protein 1 OS=Homo sapiens GN=PRPSAP1	1	4	3	2	6.00106	2.08844	19.6768	9.97473	1.13651e-05	1.92451e-05	3.90585	0.992162	1	1	WT - Control	limma	1.13651e-05	1.92451e-05	TRUE	hit	6.00106
1189	AIMP2	Q13155	Aminoacyl tRNA synthase complex-interacting multifunctional protein 2 OS=Homo sapiens GN=AIMP2 PE=1 SV=2	1	4	3	3	6.41065	1.96759	22.0798	9.97366	4.72263e-06	9.11511e-06	4.60049	0.992163	1	1	WT - Control	limma	4.72263e-06	9.11511e-06	TRUE	hit	6.41065
1190	PSMB2	P49721	Proteasome subunit beta type-2 OS=Homo sapiens GN=PSMB2 PE=1 SV=1	1	4	3	2	6.12634	2.35791	19.6722	9.97062	4.73424e-06	9.12975e-06	4.59788	0.992166	1	1	WT - Control	limma	4.73424e-06	9.12975e-06	TRUE	hit	6.12634
1191	FKBP5	Q13451	Peptidyl-prolyl cis-trans isomerase FKBP5 OS=Homo sapiens GN=FKBP5 PE=1 SV=2	1	4	3	3	5.69857	1.94921	20.9831	9.96259	4.76509e-06	9.18142e-06	4.59099	0.992172	1	1	WT - Control	limma	4.76509e-06	9.18142e-06	TRUE	hit	5.69857
1192	CTBP1	Q13363|Q13363-2	C-terminal-binding protein 1 OS=Homo sapiens GN=CTBP1 PE=1 SV=2|Isoform 2 of C-terminal-binding protein 1 OS=Homo sapiens GN=CTBP1	1	4	3	2	6.20766	2.14437	20.3008	9.95927	4.7779e-06	9.19827e-06	4.58814	0.992175	1	1	WT - Control	limma	4.7779e-06	9.19827e-06	TRUE	hit	6.20766
1193	HUWE1	Q7Z6Z7|Q7Z6Z7-2|Q7Z6Z7-3	E3 ubiquitin-protein ligase HUWE1 OS=Homo sapiens GN=HUWE1 PE=1 SV=3|Isoform 2 of E3 ubiquitin-protein ligase HUWE1 OS=Homo sapiens GN=HUWE1|Isoform 3 of E3 ubiquitin-protein ligase HUWE1 OS=Homo sapiens GN=HUWE1	1	4	3	13	6.34168	2.8476	22.8909	9.94762	4.82319e-06	9.27756e-06	4.57814	0.992184	1	1	WT - Control	limma	4.82319e-06	9.27756e-06	TRUE	hit	6.34168
1194	PLCH1	Q4KWH8|Q4KWH8-2	1-phosphatidylinositol 4,5-bisphosphate phosphodiesterase eta-1 OS=Homo sapiens GN=PLCH1 PE=1 SV=1|Isoform 2 of 1-phosphatidylinositol 4,5-bisphosphate phosphodiesterase eta-1 OS=Homo sapiens GN=PLCH1	1	4	3	3	6.04584	3.84246	20.8196	9.93062	4.89011e-06	9.39831e-06	4.56351	0.992197	1	1	WT - Control	limma	4.89011e-06	9.39831e-06	TRUE	hit	6.04584
1195	ZNF529	A0A0C4DFR4|Q6P280	Zinc finger protein 529 OS=Homo sapiens GN=ZNF529 PE=1 SV=1|Zinc finger protein 529 OS=Homo sapiens GN=ZNF529 PE=2 SV=2	1	4	3	2	5.94858	2.27889	19.6542	9.92931	1.17447e-05	1.98137e-05	3.87117	0.992198	1	1	WT - Control	limma	1.17447e-05	1.98137e-05	TRUE	hit	5.94858
1196	WNT5A|WNT5B	P41221|P41221-2|Q9H1J7	Protein Wnt-5a OS=Homo sapiens GN=WNT5A PE=1 SV=2|Isoform 2 of Protein Wnt-5a OS=Homo sapiens GN=WNT5A|Protein Wnt-5b OS=Homo sapiens GN=WNT5B PE=2 SV=2	1	4	3	2	5.95565	2.5051	19.7718	9.91593	4.94878e-06	9.49495e-06	4.55086	0.992209	1	1	WT - Control	limma	4.94878e-06	9.49495e-06	TRUE	hit	5.95565
1197	ZNF607	Q96SK3|Q96SK3-3	Zinc finger protein 607 OS=Homo sapiens GN=ZNF607 PE=1 SV=3|Isoform 3 of Zinc finger protein 607 OS=Homo sapiens GN=ZNF607	1	4	3	4	5.67988	2.25079	20.6795	9.90592	1.19457e-05	2.01078e-05	3.85324	0.992216	1	1	WT - Control	limma	1.19457e-05	2.01078e-05	TRUE	hit	5.67988
1198	XRCC1	F5H8D7|P18887	DNA repair protein XRCC1 OS=Homo sapiens GN=XRCC1 PE=1 SV=2|DNA repair protein XRCC1 OS=Homo sapiens GN=XRCC1 PE=1 SV=2	1	4	3	3	6.13332	1.68261	20.6049	9.90531	4.9917e-06	9.56918e-06	4.54169	0.992217	1	1	WT - Control	limma	4.9917e-06	9.56918e-06	TRUE	hit	6.13332
1199	ZNF337	Q9Y3M9|Q9Y3M9-2	Zinc finger protein 337 OS=Homo sapiens GN=ZNF337 PE=1 SV=2|Isoform 2 of Zinc finger protein 337 OS=Homo sapiens GN=ZNF337	1	4	3	2	5.76456	2.11294	20.0808	9.87658	5.10981e-06	9.78731e-06	4.51687	0.99224	1	1	WT - Control	limma	5.10981e-06	9.78731e-06	TRUE	hit	5.76456
1200	SCRIB	A0A0G2JNZ2|A0A0G2JPP5|Q14160|Q14160-3	Protein scribble homolog OS=Homo sapiens GN=SCRIB PE=1 SV=1|Protein scribble homolog OS=Homo sapiens GN=SCRIB PE=1 SV=1|Protein scribble homolog OS=Homo sapiens GN=SCRIB PE=1 SV=4|Isoform 3 of Protein scribble homolog OS=Homo sapiens GN=SCRIB	1	4	3	7	6.0019	2.15555	21.8648	9.87111	5.13264e-06	9.81125e-06	4.51214	0.992244	1	1	WT - Control	limma	5.13264e-06	9.81125e-06	TRUE	hit	6.0019
1201	ADCK4	Q96D53|Q96D53-2	AarF domain-containing protein kinase 4 OS=Homo sapiens GN=ADCK4 PE=1 SV=2|Isoform 2 of AarF domain-containing protein kinase 4 OS=Homo sapiens GN=ADCK4	1	4	3	8	6.72373	2.73981	21.6399	9.87045	5.13544e-06	9.81125e-06	4.51156	0.992244	1	1	WT - Control	limma	5.13544e-06	9.81125e-06	TRUE	hit	6.72373
1202	PPIB	P23284	Peptidyl-prolyl cis-trans isomerase B OS=Homo sapiens GN=PPIB PE=1 SV=2	1	4	3	2	5.98444	3.15234	20.5177	9.86953	5.13926e-06	9.81125e-06	4.51077	0.992245	1	1	WT - Control	limma	5.13926e-06	9.81125e-06	TRUE	hit	5.98444
1203	MYO19	Q96H55	Unconventional myosin-XIX OS=Homo sapiens GN=MYO19 PE=1 SV=2	1	4	3	8	6.65331	3.58185	22.6552	9.86864	5.14302e-06	9.81125e-06	4.50999	0.992246	1	1	WT - Control	limma	5.14302e-06	9.81125e-06	TRUE	hit	6.65331
1204	SLC35E1	Q96K37	Solute carrier family 35 member E1 OS=Homo sapiens GN=SLC35E1 PE=1 SV=2	1	4	3	2	5.8728	2.24741	20.03	9.86841	5.14397e-06	9.81125e-06	4.5098	0.992246	1	1	WT - Control	limma	5.14397e-06	9.81125e-06	TRUE	hit	5.8728
1205	SULF2	Q8IWU5|Q8IWU5-2	Extracellular sulfatase Sulf-2 OS=Homo sapiens GN=SULF2 PE=1 SV=1|Isoform 2 of Extracellular sulfatase Sulf-2 OS=Homo sapiens GN=SULF2	1	4	3	2	6.2763	2.83514	20.3108	9.86736	5.14836e-06	9.81136e-06	4.50889	0.992247	1	1	WT - Control	limma	5.14836e-06	9.81136e-06	TRUE	hit	6.2763
1206	TUBGCP4	Q9UGJ1|Q9UGJ1-2	Gamma-tubulin complex component 4 OS=Homo sapiens GN=TUBGCP4 PE=1 SV=1|Isoform 2 of Gamma-tubulin complex component 4 OS=Homo sapiens GN=TUBGCP4	1	4	3	4	6.0921	3.8813	21.1285	9.86371	5.16373e-06	9.83238e-06	4.50573	0.99225	1	1	WT - Control	limma	5.16373e-06	9.83238e-06	TRUE	hit	6.0921
1207	UPF1	Q92900|Q92900-2	Regulator of nonsense transcripts 1 OS=Homo sapiens GN=UPF1 PE=1 SV=2|Isoform 2 of Regulator of nonsense transcripts 1 OS=Homo sapiens GN=UPF1	1	4	3	10	6.73937	1.7201	22.9976	9.85898	5.18372e-06	9.85428e-06	4.50163	0.992253	1	1	WT - Control	limma	5.18372e-06	9.85428e-06	TRUE	hit	6.73937
1208	TSPYL1	Q9H0U9	Testis-specific Y-encoded-like protein 1 OS=Homo sapiens GN=TSPYL1 PE=1 SV=3	1	4	3	2	5.85189	2.28227	20.1434	9.85894	1.23611e-05	2.07147e-05	3.81712	0.992253	1	1	WT - Control	limma	1.23611e-05	2.07147e-05	TRUE	hit	5.85189
1209	TSHZ3	Q63HK5	Teashirt homolog 3 OS=Homo sapiens GN=TSHZ3 PE=1 SV=2	1	4	3	2	5.39691	2.12129	19.3581	9.85709	5.19173e-06	9.85771e-06	4.49999	0.992255	1	1	WT - Control	limma	5.19173e-06	9.85771e-06	TRUE	hit	5.39691
1210	SLC1A3	A0A087WT87|A0A087X0U3|P43003|P43003-2	Excitatory amino acid transporter 1 OS=Homo sapiens GN=SLC1A3 PE=1 SV=1|Excitatory amino acid transporter 1 OS=Homo sapiens GN=SLC1A3 PE=1 SV=1|Excitatory amino acid transporter 1 OS=Homo sapiens GN=SLC1A3 PE=1 SV=1|Isoform 2 of Excitatory amino acid transporter 1 OS=Homo sapiens GN=SLC1A3	1	4	3	3	6.32324	4.66269	21.5209	9.8557	5.1976e-06	9.85771e-06	4.49879	0.992256	1	1	WT - Control	limma	5.1976e-06	9.85771e-06	TRUE	hit	6.32324
1211	DDX39A	O00148	ATP-dependent RNA helicase DDX39A OS=Homo sapiens GN=DDX39A PE=1 SV=2	1	4	3	2	6.18901	3.15753	20.3683	9.85366	5.20625e-06	9.86356e-06	4.49702	0.992258	1	1	WT - Control	limma	5.20625e-06	9.86356e-06	TRUE	hit	6.18901
1212	TRAFD1	O14545	TRAF-type zinc finger domain-containing protein 1 OS=Homo sapiens GN=TRAFD1 PE=1 SV=1	1	4	3	2	6.28781	1.90051	20.1677	9.8503	5.22059e-06	9.88245e-06	4.4941	0.99226	1	1	WT - Control	limma	5.22059e-06	9.88245e-06	TRUE	hit	6.28781
1213	CAND1	Q86VP6|Q86VP6-2	Cullin-associated NEDD8-dissociated protein 1 OS=Homo sapiens GN=CAND1 PE=1 SV=2|Isoform 2 of Cullin-associated NEDD8-dissociated protein 1 OS=Homo sapiens GN=CAND1	1	4	3	8	6.88851	3.85406	23.073	9.84736	5.23312e-06	9.8979e-06	4.49156	0.992262	1	1	WT - Control	limma	5.23312e-06	9.8979e-06	TRUE	hit	6.88851
1214	PHF8	H0Y3N9|Q9UPP1|Q9UPP1-2|Q9UPP1-3|Q9UPP1-4	Histone lysine demethylase PHF8 (Fragment) OS=Homo sapiens GN=PHF8 PE=1 SV=1|Histone lysine demethylase PHF8 OS=Homo sapiens GN=PHF8 PE=1 SV=3|Isoform 2 of Histone lysine demethylase PHF8 OS=Homo sapiens GN=PHF8|Isoform 3 of Histone lysine demethylase PHF8 OS=Homo sapiens GN=PHF8|Isoform 4 of Histone lysine demethylase PHF8 OS=Homo sapiens GN=PHF8	1	4	3	4	5.96394	2.81593	20.6699	9.84623	1.24763e-05	2.08614e-05	3.88651	0.992263	1	1	WT - Control	limma	1.24763e-05	2.08614e-05	TRUE	hit	5.96394
1215	PELP1	C9JFV4|Q8IZL8	Proline-, glutamic acid- and leucine-rich protein 1 OS=Homo sapiens GN=PELP1 PE=1 SV=2|Proline-, glutamic acid- and leucine-rich protein 1 OS=Homo sapiens GN=PELP1 PE=1 SV=2	1	4	3	5	6.29751	1.92345	20.8575	9.84344	5.24991e-06	9.92136e-06	4.48816	0.992266	1	1	WT - Control	limma	5.24991e-06	9.92136e-06	TRUE	hit	6.29751
1216	KCNJ11	Q14654|Q14654-2	ATP-sensitive inward rectifier potassium channel 11 OS=Homo sapiens GN=KCNJ11 PE=1 SV=2|Isoform 2 of ATP-sensitive inward rectifier potassium channel 11 OS=Homo sapiens GN=KCNJ11	1	4	3	2	5.8909	2.14605	19.2444	9.82388	1.26818e-05	2.11581e-05	3.79005	0.992281	1	1	WT - Control	limma	1.26818e-05	2.11581e-05	TRUE	hit	5.8909
1217	LLGL1	A0A087WW77|Q15334	Lethal(2) giant larvae protein homolog 1 OS=Homo sapiens GN=LLGL1 PE=1 SV=1|Lethal(2) giant larvae protein homolog 1 OS=Homo sapiens GN=LLGL1 PE=1 SV=3	1	4	3	5	6.02916	2.06591	20.6841	9.80478	1.28604e-05	2.14051e-05	3.77527	0.992296	1	1	WT - Control	limma	1.28604e-05	2.14051e-05	TRUE	hit	6.02916
1218	OSBPL6	Q9BZF3|Q9BZF3-2|Q9BZF3-3|Q9BZF3-4|Q9BZF3-5	Oxysterol-binding protein-related protein 6 OS=Homo sapiens GN=OSBPL6 PE=1 SV=1|Isoform 2 of Oxysterol-binding protein-related protein 6 OS=Homo sapiens GN=OSBPL6|Isoform 3 of Oxysterol-binding protein-related protein 6 OS=Homo sapiens GN=OSBPL6|Isoform 4 of Oxysterol-binding protein-related protein 6 OS=Homo sapiens GN=OSBPL6|Isoform 5 of Oxysterol-binding protein-related protein 6 OS=Homo sapie…	1	4	3	2	5.75737	2.31686	19.5581	9.804	1.28677e-05	2.14051e-05	3.77467	0.992297	1	1	WT - Control	limma	1.28677e-05	2.14051e-05	TRUE	hit	5.75737
1219	SCO2	O43819	Protein SCO2 homolog, mitochondrial OS=Homo sapiens GN=SCO2 PE=1 SV=3	1	4	3	7	7.21227	2.96872	22.7974	9.80296	5.42688e-06	1.02472e-05	4.45295	0.992297	1	1	WT - Control	limma	5.42688e-06	1.02472e-05	TRUE	hit	7.21227
1220	HLTF	A0A0C4DGA6|Q14527|Q14527-2	Helicase-like transcription factor OS=Homo sapiens GN=HLTF PE=1 SV=1|Helicase-like transcription factor OS=Homo sapiens GN=HLTF PE=1 SV=2|Isoform 2 of Helicase-like transcription factor OS=Homo sapiens GN=HLTF	1	4	3	4	6.06334	3.32701	20.9442	9.78872	5.49067e-06	1.03591e-05	4.44054	0.992309	1	1	WT - Control	limma	5.49067e-06	1.03591e-05	TRUE	hit	6.06334
1221	CAPN7	Q9Y6W3	Calpain-7 OS=Homo sapiens GN=CAPN7 PE=1 SV=1	1	4	3	2	5.65318	2.0367	19.3825	9.78062	1.30903e-05	2.17435e-05	3.75653	0.992315	1	1	WT - Control	limma	1.30903e-05	2.17435e-05	TRUE	hit	5.65318
1222	RPL4	P36578	60S ribosomal protein L4 OS=Homo sapiens GN=RPL4 PE=1 SV=5	1	4	3	10	7.4406	1.85844	24.2968	9.77759	5.54114e-06	1.04456e-05	4.43082	0.992317	1	1	WT - Control	limma	5.54114e-06	1.04456e-05	TRUE	hit	7.4406
1223	ZNF302	A0A087WYF4|A0A0D9SFG5|E7EVR1|Q9NR11|Q9NR11-2	Zinc finger protein 302 OS=Homo sapiens GN=ZNF302 PE=1 SV=1|Zinc finger protein 302 OS=Homo sapiens GN=ZNF302 PE=1 SV=1|Zinc finger protein 302 OS=Homo sapiens GN=ZNF302 PE=1 SV=1|Zinc finger protein 302 OS=Homo sapiens GN=ZNF302 PE=1 SV=1|Isoform 2 of Zinc finger protein 302 OS=Homo sapiens GN=ZNF302	1	4	3	2	5.57959	2.92029	20.3155	9.76766	1.32155e-05	2.19033e-05	3.74646	0.992325	1	1	WT - Control	limma	1.32155e-05	2.19033e-05	TRUE	hit	5.57959
1224	PHF10	Q8WUB8|Q8WUB8-2|Q8WUB8-3|S5FZ81	PHD finger protein 10 OS=Homo sapiens GN=PHF10 PE=1 SV=3|Isoform 2 of PHD finger protein 10 OS=Homo sapiens GN=PHF10|Isoform 3 of PHD finger protein 10 OS=Homo sapiens GN=PHF10|PHD finger protein 10 OS=Homo sapiens GN=PHF10 PE=1 SV=1	1	4	3	3	5.98173	1.71866	21.3045	9.76736	5.58795e-06	1.05251e-05	4.42189	0.992325	1	1	WT - Control	limma	5.58795e-06	1.05251e-05	TRUE	hit	5.98173
1225	RBM15	A0A087WWP4|Q96T37|Q96T37-2|Q96T37-3|Q96T37-4	Putative RNA-binding protein 15 OS=Homo sapiens GN=RBM15 PE=1 SV=1|Putative RNA-binding protein 15 OS=Homo sapiens GN=RBM15 PE=1 SV=2|Isoform 2 of Putative RNA-binding protein 15 OS=Homo sapiens GN=RBM15|Isoform 3 of Putative RNA-binding protein 15 OS=Homo sapiens GN=RBM15|Isoform 4 of Putative RNA-binding protein 15 OS=Homo sapiens GN=RBM15	1	4	3	3	6.29475	1.90129	21.1828	9.76252	5.61026e-06	1.05583e-05	4.41766	0.992329	1	1	WT - Control	limma	5.61026e-06	1.05583e-05	TRUE	hit	6.29475
1226	MRPS27	D6RH20|G5EA06|Q92552|Q92552-2	28S ribosomal protein S27, mitochondrial (Fragment) OS=Homo sapiens GN=MRPS27 PE=1 SV=1|28S ribosomal protein S27, mitochondrial OS=Homo sapiens GN=MRPS27 PE=1 SV=1|28S ribosomal protein S27, mitochondrial OS=Homo sapiens GN=MRPS27 PE=1 SV=3|Isoform 2 of 28S ribosomal protein S27, mitochondrial OS=Homo sapiens GN=MRPS27	1	4	3	3	6.19372	1.95676	21.5572	9.75812	5.63062e-06	1.05804e-05	4.41381	0.992333	1	1	WT - Control	limma	5.63062e-06	1.05804e-05	TRUE	hit	6.19372
1227	MAN2A2	P49641	Alpha-mannosidase 2x OS=Homo sapiens GN=MAN2A2 PE=2 SV=3	1	4	3	5	5.97275	3.08716	21.0484	9.75795	5.63138e-06	1.05804e-05	4.41367	0.992333	1	1	WT - Control	limma	5.63138e-06	1.05804e-05	TRUE	hit	5.97275
1228	TRIM28	Q13263	Transcription intermediary factor 1-beta OS=Homo sapiens GN=TRIM28 PE=1 SV=5	1	4	3	16	7.51782	2.10238	23.9038	9.75195	5.6593e-06	1.06153e-05	4.40841	0.992337	1	1	WT - Control	limma	5.6593e-06	1.06153e-05	TRUE	hit	7.51782
1229	CCT8	P50990|P50990-2	T-complex protein 1 subunit theta OS=Homo sapiens GN=CCT8 PE=1 SV=4|Isoform 2 of T-complex protein 1 subunit theta OS=Homo sapiens GN=CCT8	1	4	3	16	7.2469	1.76771	24.302	9.75075	5.6649e-06	1.0617e-05	4.40736	0.992338	1	1	WT - Control	limma	5.6649e-06	1.0617e-05	TRUE	hit	7.2469
1230	UBAP2	F5H2U4|Q5T6F2	Ubiquitin-associated protein 2 OS=Homo sapiens GN=UBAP2 PE=1 SV=2|Ubiquitin-associated protein 2 OS=Homo sapiens GN=UBAP2 PE=1 SV=1	1	4	3	2	5.50592	2.34774	19.4272	9.74512	1.34366e-05	2.22534e-05	3.72892	0.992343	1	1	WT - Control	limma	1.34366e-05	2.22534e-05	TRUE	hit	5.50592
1231	MYO9B	M0R0P8|M0R300|Q13459|Q13459-2	Unconventional myosin-IXb OS=Homo sapiens GN=MYO9B PE=1 SV=1|Unconventional myosin-IXb (Fragment) OS=Homo sapiens GN=MYO9B PE=1 SV=7|Unconventional myosin-IXb OS=Homo sapiens GN=MYO9B PE=1 SV=3|Isoform Short of Unconventional myosin-IXb OS=Homo sapiens GN=MYO9B	1	4	3	5	5.99827	2.35011	21.7719	9.74082	5.71148e-06	1.06954e-05	4.39866	0.992346	1	1	WT - Control	limma	5.71148e-06	1.06954e-05	TRUE	hit	5.99827
1232	MATR3	A0A0R4J2E8|A8MXP9|D6REM6|P43243	Matrin-3 OS=Homo sapiens GN=MATR3 PE=1 SV=1|Matrin-3 OS=Homo sapiens GN=MATR3 PE=1 SV=1|Matrin-3 OS=Homo sapiens GN=MATR3 PE=1 SV=1|Matrin-3 OS=Homo sapiens GN=MATR3 PE=1 SV=2	1	4	3	10	7.08788	1.91847	23.5667	9.73728	5.72815e-06	1.07178e-05	4.39557	0.992349	1	1	WT - Control	limma	5.72815e-06	1.07178e-05	TRUE	hit	7.08788
1233	POLR2H	C9JLU1|P52434|P52434-3	DNA-directed RNA polymerases I, II, and III subunit RPABC3 (Fragment) OS=Homo sapiens GN=POLR2H PE=1 SV=7|DNA-directed RNA polymerases I, II, and III subunit RPABC3 OS=Homo sapiens GN=POLR2H PE=1 SV=4|Isoform 3 of DNA-directed RNA polymerases I, II, and III subunit RPABC3 OS=Homo sapiens GN=POLR2H	1	4	3	2	6.28211	2.34066	20.088	9.73276	5.74955e-06	1.0749e-05	4.39161	0.992353	1	1	WT - Control	limma	5.74955e-06	1.0749e-05	TRUE	hit	6.28211
1234	NUBPL	Q8TB37	Iron-sulfur protein NUBPL OS=Homo sapiens GN=NUBPL PE=1 SV=3	1	4	3	2	6.11384	2.25182	20.0361	9.72252	1.36623e-05	2.25448e-05	3.71129	0.992361	1	1	WT - Control	limma	1.36623e-05	2.25448e-05	TRUE	hit	6.11384
1235	EIF3D	O15371|O15371-2|O15371-3	Eukaryotic translation initiation factor 3 subunit D OS=Homo sapiens GN=EIF3D PE=1 SV=1|Isoform 2 of Eukaryotic translation initiation factor 3 subunit D OS=Homo sapiens GN=EIF3D|Isoform 3 of Eukaryotic translation initiation factor 3 subunit D OS=Homo sapiens GN=EIF3D	1	4	3	4	6.36164	2.15057	21.6821	9.71392	5.83974e-06	1.09086e-05	4.37507	0.992367	1	1	WT - Control	limma	5.83974e-06	1.09086e-05	TRUE	hit	6.36164
1236	WDR34	Q96EX3	WD repeat-containing protein 34 OS=Homo sapiens GN=WDR34 PE=1 SV=2	1	4	3	5	6.00957	2.76394	20.4808	9.69561	5.92888e-06	1.10659e-05	4.35897	0.992382	1	1	WT - Control	limma	5.92888e-06	1.10659e-05	TRUE	hit	6.00957
1237	CYFIP1	Q7L576	Cytoplasmic FMR1-interacting protein 1 OS=Homo sapiens GN=CYFIP1 PE=1 SV=1	1	4	3	5	6.15257	2.98665	21.283	9.69343	5.9396e-06	1.10768e-05	4.35705	0.992383	1	1	WT - Control	limma	5.9396e-06	1.10768e-05	TRUE	hit	6.15257
1238	SPATS2L	A0A0A0MSG5|B8ZZZ7|Q9NUQ6|Q9NUQ6-2|Q9NUQ6-3|Q9NUQ6-4	SPATS2-like protein OS=Homo sapiens GN=SPATS2L PE=1 SV=1|DNA polymerase-transactivated protein 6, isoform CRA_b OS=Homo sapiens GN=SPATS2L PE=1 SV=1|SPATS2-like protein OS=Homo sapiens GN=SPATS2L PE=1 SV=2|Isoform 2 of SPATS2-like protein OS=Homo sapiens GN=SPATS2L|Isoform 3 of SPATS2-like protein OS=Homo sapiens GN=SPATS2L|Isoform 4 of SPATS2-like protein OS=Homo sapiens GN=SPATS2L	1	4	3	2	5.81859	1.82314	20.8201	9.6906	5.95352e-06	1.10936e-05	4.35457	0.992386	1	1	WT - Control	limma	5.95352e-06	1.10936e-05	TRUE	hit	5.81859
1239	MED1	Q15648	Mediator of RNA polymerase II transcription subunit 1 OS=Homo sapiens GN=MED1 PE=1 SV=4	1	4	3	3	5.81803	2.23856	20.1475	9.66651	6.07366e-06	1.13081e-05	4.33334	0.992405	1	1	WT - Control	limma	6.07366e-06	1.13081e-05	TRUE	hit	5.81803
1240	GTF3C5	Q9Y5Q8|Q9Y5Q8-2|Q9Y5Q8-3	General transcription factor 3C polypeptide 5 OS=Homo sapiens GN=GTF3C5 PE=1 SV=2|Isoform 2 of General transcription factor 3C polypeptide 5 OS=Homo sapiens GN=GTF3C5|Isoform 3 of General transcription factor 3C polypeptide 5 OS=Homo sapiens GN=GTF3C5	1	4	3	6	6.48736	1.86198	22.2739	9.66553	6.07859e-06	1.13081e-05	4.33247	0.992405	1	1	WT - Control	limma	6.07859e-06	1.13081e-05	TRUE	hit	6.48736
1241	RAD50	Q92878|Q92878-2	DNA repair protein RAD50 OS=Homo sapiens GN=RAD50 PE=1 SV=1|Isoform 2 of DNA repair protein RAD50 OS=Homo sapiens GN=RAD50	1	4	3	18	6.64243	1.70899	23.9436	9.65068	6.15407e-06	1.14391e-05	4.31936	0.992417	1	1	WT - Control	limma	6.15407e-06	1.14391e-05	TRUE	hit	6.64243
1242	STOML1	Q9UBI4|Q9UBI4-2|Q9UBI4-3|Q9UBI4-4|Q9UBI4-6	Stomatin-like protein 1 OS=Homo sapiens GN=STOML1 PE=1 SV=1|Isoform 2 of Stomatin-like protein 1 OS=Homo sapiens GN=STOML1|Isoform 3 of Stomatin-like protein 1 OS=Homo sapiens GN=STOML1|Isoform 4 of Stomatin-like protein 1 OS=Homo sapiens GN=STOML1|Isoform 6 of Stomatin-like protein 1 OS=Homo sapiens GN=STOML1	1	4	3	3	5.91813	3.51044	20.5064	9.63654	6.22689e-06	1.1565e-05	4.30685	0.992428	1	1	WT - Control	limma	6.22689e-06	1.1565e-05	TRUE	hit	5.91813
1243	DNA2	P51530|P51530-4	DNA replication ATP-dependent helicase/nuclease DNA2 OS=Homo sapiens GN=DNA2 PE=1 SV=3|Isoform 4 of DNA replication ATP-dependent helicase/nuclease DNA2 OS=Homo sapiens GN=DNA2	1	4	3	7	6.32761	2.64105	22.279	9.62882	6.26702e-06	1.16287e-05	4.30003	0.992434	1	1	WT - Control	limma	6.26702e-06	1.16287e-05	TRUE	hit	6.32761
1244	CDK12	J3QSD7|Q9NYV4|Q9NYV4-2|Q9NYV4-3	Cyclin-dependent kinase 12 (Fragment) OS=Homo sapiens GN=CDK12 PE=1 SV=1|Cyclin-dependent kinase 12 OS=Homo sapiens GN=CDK12 PE=1 SV=2|Isoform 2 of Cyclin-dependent kinase 12 OS=Homo sapiens GN=CDK12|Isoform 3 of Cyclin-dependent kinase 12 OS=Homo sapiens GN=CDK12	1	4	3	4	5.73719	2.21895	21.1494	9.62796	6.27151e-06	1.16287e-05	4.29926	0.992435	1	1	WT - Control	limma	6.27151e-06	1.16287e-05	TRUE	hit	5.73719
1245	MRPL3	E7ETU7|H0Y9G6|P09001	39S ribosomal protein L3, mitochondrial OS=Homo sapiens GN=MRPL3 PE=1 SV=1|39S ribosomal protein L3, mitochondrial (Fragment) OS=Homo sapiens GN=MRPL3 PE=1 SV=1|39S ribosomal protein L3, mitochondrial OS=Homo sapiens GN=MRPL3 PE=1 SV=1	1	4	3	3	6.16653	1.90718	21.7442	9.62074	6.30935e-06	1.16893e-05	4.29287	0.992441	1	1	WT - Control	limma	6.30935e-06	1.16893e-05	TRUE	hit	6.16653
1246	RPL24	C9JNW5|P83731	60S ribosomal protein L24 OS=Homo sapiens GN=RPL24 PE=1 SV=1|60S ribosomal protein L24 OS=Homo sapiens GN=RPL24 PE=1 SV=1	1	4	3	3	6.45263	2.22069	22.6316	9.61352	6.34746e-06	1.17503e-05	4.28647	0.992446	1	1	WT - Control	limma	6.34746e-06	1.17503e-05	TRUE	hit	6.45263
1247	SSR4	P51571	Translocon-associated protein subunit delta OS=Homo sapiens GN=SSR4 PE=1 SV=1	1	4	3	5	7.74063	4.36836	22.4989	9.61202	6.35542e-06	1.17554e-05	4.28514	0.992447	1	1	WT - Control	limma	6.35542e-06	1.17554e-05	TRUE	hit	7.74063
1248	ZNF567	F8WEL6|Q8N184|Q8N184-1	Zinc finger protein 567 OS=Homo sapiens GN=ZNF567 PE=1 SV=1|Zinc finger protein 567 OS=Homo sapiens GN=ZNF567 PE=1 SV=3|Isoform 1 of Zinc finger protein 567 OS=Homo sapiens GN=ZNF567	1	4	3	3	5.55527	2.04233	20.4077	9.61083	6.36171e-06	1.17575e-05	4.28408	0.992448	1	1	WT - Control	limma	6.36171e-06	1.17575e-05	TRUE	hit	5.55527
1249	CPD	O75976	Carboxypeptidase D OS=Homo sapiens GN=CPD PE=1 SV=2	1	4	3	6	6.41123	2.29548	21.2846	9.60883	1.48646e-05	2.43689e-05	3.62201	0.99245	1	1	WT - Control	limma	1.48646e-05	2.43689e-05	TRUE	hit	6.41123
1250	PRPF19	Q9UMS4	Pre-mRNA-processing factor 19 OS=Homo sapiens GN=PRPF19 PE=1 SV=1	1	4	3	4	6.52575	1.71466	22.1959	9.60727	6.38061e-06	1.17828e-05	4.28093	0.992451	1	1	WT - Control	limma	6.38061e-06	1.17828e-05	TRUE	hit	6.52575
1251	SAMD1	Q6SPF0	Atherin OS=Homo sapiens GN=SAMD1 PE=1 SV=1	1	4	3	2	6.32012	2.48869	19.877	9.60191	1.49415e-05	2.44773e-05	3.61654	0.992455	1	1	WT - Control	limma	1.49415e-05	2.44773e-05	TRUE	hit	6.32012
1252	RAB10	P61026	Ras-related protein Rab-10 OS=Homo sapiens GN=RAB10 PE=1 SV=1	1	4	3	2	6.12366	2.44105	21.1441	9.60167	6.4105e-06	1.18187e-05	4.27596	0.992456	1	1	WT - Control	limma	6.4105e-06	1.18187e-05	TRUE	hit	6.12366
1253	PRR14L	Q5THK1	Protein PRR14L OS=Homo sapiens GN=PRR14L PE=1 SV=1	1	4	3	9	5.8888	2.6878	21.9447	9.59989	6.42007e-06	1.18267e-05	4.27438	0.992457	1	1	WT - Control	limma	6.42007e-06	1.18267e-05	TRUE	hit	5.8888
1254	EHMT1	Q9H9B1	Histone-lysine N-methyltransferase EHMT1 OS=Homo sapiens GN=EHMT1 PE=1 SV=4	1	4	3	6	6.1877	1.87654	21.9618	9.59679	6.43667e-06	1.1838e-05	4.27163	0.992459	1	1	WT - Control	limma	6.43667e-06	1.1838e-05	TRUE	hit	6.1877
1255	MRPS12	O15235	28S ribosomal protein S12, mitochondrial OS=Homo sapiens GN=MRPS12 PE=1 SV=1	1	4	3	3	6.23729	3.27384	21.2273	9.59396	6.45195e-06	1.1848e-05	4.26911	0.992462	1	1	WT - Control	limma	6.45195e-06	1.1848e-05	TRUE	hit	6.23729
1256	NME7	B4DXC8|E9PNU1|Q9Y5B8|Q9Y5B8-2	Nucleoside diphosphate kinase 7 OS=Homo sapiens GN=NME7 PE=1 SV=1|Nucleoside diphosphate kinase 7 OS=Homo sapiens GN=NME7 PE=1 SV=1|Nucleoside diphosphate kinase 7 OS=Homo sapiens GN=NME7 PE=1 SV=1|Isoform 2 of Nucleoside diphosphate kinase 7 OS=Homo sapiens GN=NME7	1	4	3	3	6.00668	2.74138	20.5262	9.59384	6.45256e-06	1.1848e-05	4.26901	0.992462	1	1	WT - Control	limma	6.45256e-06	1.1848e-05	TRUE	hit	6.00668
1257	HPS6	Q86YV9	Hermansky-Pudlak syndrome 6 protein OS=Homo sapiens GN=HPS6 PE=1 SV=1	1	4	3	2	5.92889	2.64196	19.9466	9.5896	6.47546e-06	1.18804e-05	4.26524	0.992465	1	1	WT - Control	limma	6.47546e-06	1.18804e-05	TRUE	hit	5.92889
1258	CLPB	H0YGM0|Q9H078|Q9H078-2|Q9H078-4	Caseinolytic peptidase B protein homolog (Fragment) OS=Homo sapiens GN=CLPB PE=1 SV=1|Caseinolytic peptidase B protein homolog OS=Homo sapiens GN=CLPB PE=1 SV=1|Isoform 2 of Caseinolytic peptidase B protein homolog OS=Homo sapiens GN=CLPB|Isoform 4 of Caseinolytic peptidase B protein homolog OS=Homo sapiens GN=CLPB	1	4	3	4	5.89229	1.71073	21.0367	9.58738	6.48752e-06	1.18929e-05	4.26326	0.992467	1	1	WT - Control	limma	6.48752e-06	1.18929e-05	TRUE	hit	5.89229
1259	FAM83D	A0A087WXK8|Q9H4H8	Chromosome 20 open reading frame 129 OS=Homo sapiens GN=FAM83D PE=1 SV=1|Protein FAM83D OS=Homo sapiens GN=FAM83D PE=1 SV=3	1	4	3	2	6.24281	2.61935	20.0213	9.56593	6.60499e-06	1.20887e-05	4.24418	0.992484	1	1	WT - Control	limma	6.60499e-06	1.20887e-05	TRUE	hit	6.24281
1260	STK3	Q13188|Q13188-2	Serine/threonine-protein kinase 3 OS=Homo sapiens GN=STK3 PE=1 SV=2|Isoform 2 of Serine/threonine-protein kinase 3 OS=Homo sapiens GN=STK3	1	4	3	3	5.37085	2.02969	20.1182	9.5441	6.72699e-06	1.2302e-05	4.22472	0.992501	1	1	WT - Control	limma	6.72699e-06	1.2302e-05	TRUE	hit	5.37085
1261	MEGF8	Q7Z7M0|Q7Z7M0-2	Multiple epidermal growth factor-like domains protein 8 OS=Homo sapiens GN=MEGF8 PE=1 SV=2|Isoform 2 of Multiple epidermal growth factor-like domains protein 8 OS=Homo sapiens GN=MEGF8	1	4	3	3	6.07477	2.67847	20.7865	9.5168	1.59249e-05	2.59381e-05	3.63402	0.992522	1	1	WT - Control	limma	1.59249e-05	2.59381e-05	TRUE	hit	6.07477
1262	TRAPPC3	A0A087WWM0|O43617|O43617-2	Trafficking protein particle complex subunit 3 OS=Homo sapiens GN=TRAPPC3 PE=1 SV=1|Trafficking protein particle complex subunit 3 OS=Homo sapiens GN=TRAPPC3 PE=1 SV=1|Isoform 2 of Trafficking protein particle complex subunit 3 OS=Homo sapiens GN=TRAPPC3	1	4	3	2	6.11359	1.8983	20.2867	9.50881	6.92949e-06	1.26621e-05	4.19318	0.992529	1	1	WT - Control	limma	6.92949e-06	1.26621e-05	TRUE	hit	6.11359
1263	QTRTD1	Q9H974|Q9H974-3|Q9H974-4	Queuine tRNA-ribosyltransferase subunit QTRTD1 OS=Homo sapiens GN=QTRTD1 PE=1 SV=1|Isoform 3 of Queuine tRNA-ribosyltransferase subunit QTRTD1 OS=Homo sapiens GN=QTRTD1|Isoform 4 of Queuine tRNA-ribosyltransferase subunit QTRTD1 OS=Homo sapiens GN=QTRTD1	1	4	3	4	6.20921	3.79636	21.0243	9.47059	7.15641e-06	1.30662e-05	4.1589	0.992559	1	1	WT - Control	limma	7.15641e-06	1.30662e-05	TRUE	hit	6.20921
1264	PTER	Q96BW5|Q96BW5-2	Phosphotriesterase-related protein OS=Homo sapiens GN=PTER PE=1 SV=1|Isoform 2 of Phosphotriesterase-related protein OS=Homo sapiens GN=PTER	1	4	3	2	5.64975	2.24861	19.7494	9.4673	1.65301e-05	2.67699e-05	3.50945	0.992561	1	1	WT - Control	limma	1.65301e-05	2.67699e-05	TRUE	hit	5.64975
1265	IPO5	H0Y8C6|O00410|O00410-3	Importin-5 (Fragment) OS=Homo sapiens GN=IPO5 PE=1 SV=1|Importin-5 OS=Homo sapiens GN=IPO5 PE=1 SV=4|Isoform 3 of Importin-5 OS=Homo sapiens GN=IPO5	1	4	3	5	6.40486	1.83356	22.1224	9.46206	7.20815e-06	1.31249e-05	4.15123	0.992565	1	1	WT - Control	limma	7.20815e-06	1.31249e-05	TRUE	hit	6.40486
1266	APLP2	Q06481|Q06481-2|Q06481-3|Q06481-4|Q06481-5|Q06481-6	Amyloid-like protein 2 OS=Homo sapiens GN=APLP2 PE=1 SV=2|Isoform 2 of Amyloid-like protein 2 OS=Homo sapiens GN=APLP2|Isoform 3 of Amyloid-like protein 2 OS=Homo sapiens GN=APLP2|Isoform 4 of Amyloid-like protein 2 OS=Homo sapiens GN=APLP2|Isoform 5 of Amyloid-like protein 2 OS=Homo sapiens GN=APLP2|Isoform 6 of Amyloid-like protein 2 OS=Homo sapiens GN=APLP2	1	4	3	4	5.9742	2.44356	20.3795	9.46181	7.20969e-06	1.31249e-05	4.15101	0.992565	1	1	WT - Control	limma	7.20969e-06	1.31249e-05	TRUE	hit	5.9742
[truncated: 19,110 more rows]
