# Supplementary material for: Glucocerebrosidase is imported into mitochondria and preserves complex I integrity and energy metabolism
Source: Nat Commun. 2023 Apr 6;14:1930. doi: 10.1038/s41467-023-37454-4 (PMC10079970; doi:10.1038/s41467-023-37454-4)
Supplement: Supplementary file 5 — Supplementary Data 2 [file 41467_2023_37454_MOESM5_ESM.xlsx]

## Sheet: Limma_results_V1
gene_name	protein_id	description	qupm	log2_foldChange	Average_TMT_Intensity	comparison	pvalue	fdr	hit	hit_annotation	top3
GBA	A0A0G2JLB3|P04062|P04062-2|P04062-3|P04062-4	Glucosylceramidase OS=Homo sapiens GN=GBA PE=1 SV=1|Glucosylceramidase OS=Homo sapiens GN=GBA PE=1 SV=3|Isoform 3 of Glucosylceramidase OS=Homo sapiens GN=GBA|Isoform 4 of Glucosylceramidase OS=Homo sapiens GN=GBA|Isoform Short of Glucosylceramidase OS=Homo sapiens GN=GBA	20	2.65352	26.8989	WT_GBA - CT	2.91463e-12	1.79017e-08	TRUE	hit	8.35348
HSPA5	P11021	78 kDa glucose-regulated protein OS=Homo sapiens GN=HSPA5 PE=1 SV=2	58	1.7477	29.6571	WT_GBA - CT	4.94003e-11	1.51708e-07	TRUE	hit	8.9885
PDIA4	P13667	Protein disulfide-isomerase A4 OS=Homo sapiens GN=PDIA4 PE=1 SV=2	52	1.63907	29.3115	WT_GBA - CT	1.62385e-10	3.32455e-07	TRUE	hit	8.75225
HSPB1	P04792	Heat shock protein beta-1 OS=Homo sapiens GN=HSPB1 PE=1 SV=2	2	-2.73669	22.3172	WT_GBA - CT	2.73917e-10	4.20599e-07	TRUE	hit	6.32535
CRELD1	Q96HD1	Cysteine-rich with EGF-like domain protein 1 OS=Homo sapiens GN=CRELD1 PE=1 SV=3	8	1.33686	24.6814	WT_GBA - CT	9.27606e-10	1.13947e-06	TRUE	hit	6.83451
HYOU1	A0A087X054|Q9Y4L1	Hypoxia up-regulated protein 1 OS=Homo sapiens GN=HYOU1 PE=1 SV=1	47	1.35026	28.1886	WT_GBA - CT	1.19019e-09	1.21835e-06	TRUE	hit	8.15463
HSP90B1	P14625	Endoplasmin OS=Homo sapiens GN=HSP90B1 PE=1 SV=1	60	1.43903	29.6411	WT_GBA - CT	3.36025e-09	2.94838e-06	TRUE	hit	8.96497
HMGCS1	Q01581	Hydroxymethylglutaryl-CoA synthase, cytoplasmic OS=Homo sapiens GN=HMGCS1 PE=1 SV=2	16	1.10524	27.079	WT_GBA - CT	3.98222e-09	3.05735e-06	TRUE	hit	8.02752
P4HB	H7BZ94|P07237	Protein disulfide-isomerase OS=Homo sapiens GN=P4HB PE=1 SV=2|Protein disulfide-isomerase OS=Homo sapiens GN=P4HB PE=1 SV=3	41	0.905916	28.9238	WT_GBA - CT	1.71679e-08	1.17161e-05	FALSE	candidate	8.61987
MANF	A8K878|P55145	Mesencephalic astrocyte-derived neurotrophic factor OS=Homo sapiens GN=MANF PE=1 SV=1|Mesencephalic astrocyte-derived neurotrophic factor OS=Homo sapiens GN=MANF PE=1 SV=3	16	1.03228	26.7053	WT_GBA - CT	3.43309e-08	2.1086e-05	TRUE	hit	7.85924
CDK6	Q00534	Cyclin-dependent kinase 6 OS=Homo sapiens GN=CDK6 PE=1 SV=1	12	1.00525	25.6633	WT_GBA - CT	3.8431e-08	2.14585e-05	TRUE	hit	7.46944
PPIB	P23284	Peptidyl-prolyl cis-trans isomerase B OS=Homo sapiens GN=PPIB PE=1 SV=2	18	0.801217	27.8879	WT_GBA - CT	5.02863e-08	2.32538e-05	FALSE	candidate	8.62311
CALR	P27797	Calreticulin OS=Homo sapiens GN=CALR PE=1 SV=1	31	0.825049	27.9117	WT_GBA - CT	5.07812e-08	2.32538e-05	FALSE	candidate	8.76704
AS3MT	Q9HBK9	Arsenite methyltransferase OS=Homo sapiens GN=AS3MT PE=1 SV=3	7	-1.23222	24.2148	WT_GBA - CT	5.59004e-08	2.32538e-05	TRUE	hit	6.51719
SDF2L1	Q9HCN8	Stromal cell-derived factor 2-like protein 1 OS=Homo sapiens GN=SDF2L1 PE=1 SV=2	9	1.1577	25.6559	WT_GBA - CT	5.71133e-08	2.32538e-05	TRUE	hit	7.25459
PDIA6	Q15084|Q15084-2|Q15084-3|Q15084-4|Q15084-5	Protein disulfide-isomerase A6 OS=Homo sapiens GN=PDIA6 PE=1 SV=1|Isoform 2 of Protein disulfide-isomerase A6 OS=Homo sapiens GN=PDIA6|Isoform 3 of Protein disulfide-isomerase A6 OS=Homo sapiens GN=PDIA6|Isoform 4 of Protein disulfide-isomerase A6 OS=Homo sapiens GN=PDIA6|Isoform 5 of Protein disulfide-isomerase A6 OS=Homo sapiens GN=PDIA6	24	1.11393	27.5631	WT_GBA - CT	6.05764e-08	2.32538e-05	TRUE	hit	8.6948
CANX	P27824|P27824-2	Calnexin OS=Homo sapiens GN=CANX PE=1 SV=2|Isoform 2 of Calnexin OS=Homo sapiens GN=CANX	38	0.677642	28.5317	WT_GBA - CT	6.45581e-08	2.33244e-05	FALSE	candidate	8.54606
FKBP2	P26885	Peptidyl-prolyl cis-trans isomerase FKBP2 OS=Homo sapiens GN=FKBP2 PE=1 SV=2	5	0.767182	24.4389	WT_GBA - CT	1.10323e-07	3.76062e-05	FALSE	candidate	7.36725
CRELD2	Q6UXH1|Q6UXH1-4|Q6UXH1-5|Q6UXH1-6	Cysteine-rich with EGF-like domain protein 2 OS=Homo sapiens GN=CRELD2 PE=1 SV=1|Isoform 4 of Cysteine-rich with EGF-like domain protein 2 OS=Homo sapiens GN=CRELD2|Isoform 5 of Cysteine-rich with EGF-like domain protein 2 OS=Homo sapiens GN=CRELD2|Isoform 6 of Cysteine-rich with EGF-like domain protein 2 OS=Homo sapiens GN=CRELD2	8	1.65194	25.3729	WT_GBA - CT	1.16333e-07	3.76062e-05	TRUE	hit	7.51816
SCIN	Q9Y6U3	Adseverin OS=Homo sapiens GN=SCIN PE=1 SV=4	7	-1.52133	23.6811	WT_GBA - CT	1.77202e-07	5.44188e-05	TRUE	hit	6.46556
DNAJB11	Q9UBS4	DnaJ homolog subfamily B member 11 OS=Homo sapiens GN=DNAJB11 PE=1 SV=1	18	0.867758	26.7114	WT_GBA - CT	2.3513e-07	6.62403e-05	FALSE	candidate	7.86884
KCTD12	Q96CX2	BTB/POZ domain-containing protein KCTD12 OS=Homo sapiens GN=KCTD12 PE=1 SV=1	6	-1.67488	23.9051	WT_GBA - CT	2.37266e-07	6.62403e-05	TRUE	hit	7.24767
EFNB2	P52799	Ephrin-B2 OS=Homo sapiens GN=EFNB2 PE=1 SV=1	4	-0.759274	24.3273	WT_GBA - CT	3.17101e-07	8.46797e-05	FALSE	candidate	6.4938
PTBP2	Q9UKA9|Q9UKA9-4	Polypyrimidine tract-binding protein 2 OS=Homo sapiens GN=PTBP2 PE=1 SV=1|Isoform 4 of Polypyrimidine tract-binding protein 2 OS=Homo sapiens GN=PTBP2	5	1.17211	23.8145	WT_GBA - CT	3.32295e-07	8.50398e-05	TRUE	hit	6.65927
CARS	P49589-3	Isoform 3 of Cysteine--tRNA ligase, cytoplasmic OS=Homo sapiens GN=CARS	22	0.616107	26.3977	WT_GBA - CT	3.5208e-07	8.64991e-05	FALSE	candidate	7.23269
CXADR	P78310|P78310-2|P78310-6|P78310-7	Coxsackievirus and adenovirus receptor OS=Homo sapiens GN=CXADR PE=1 SV=1|Isoform 2 of Coxsackievirus and adenovirus receptor OS=Homo sapiens GN=CXADR|Isoform 6 of Coxsackievirus and adenovirus receptor OS=Homo sapiens GN=CXADR|Isoform 7 of Coxsackievirus and adenovirus receptor OS=Homo sapiens GN=CXADR	6	0.641996	23.6676	WT_GBA - CT	3.76016e-07	8.88264e-05	FALSE	candidate	6.64522
GGA1	Q9UJY5|Q9UJY5-4|Q9UJY5-6	ADP-ribosylation factor-binding protein GGA1 OS=Homo sapiens GN=GGA1 PE=1 SV=1|Isoform 4 of ADP-ribosylation factor-binding protein GGA1 OS=Homo sapiens GN=GGA1|Isoform 6 of ADP-ribosylation factor-binding protein GGA1 OS=Homo sapiens GN=GGA1	7	0.607468	25.6392	WT_GBA - CT	3.924e-07	8.92636e-05	FALSE	candidate	7.20004
BST2	Q10589|Q10589-2	Bone marrow stromal antigen 2 OS=Homo sapiens GN=BST2 PE=1 SV=1|Isoform 2 of Bone marrow stromal antigen 2 OS=Homo sapiens GN=BST2	2	-3.49796	21.9032	WT_GBA - CT	4.11911e-07	9.03556e-05	TRUE	hit	6.71667
SND1	H7C597|Q7KZF4	Staphylococcal nuclease domain-containing protein 1 (Fragment) OS=Homo sapiens GN=SND1 PE=1 SV=1|Staphylococcal nuclease domain-containing protein 1 OS=Homo sapiens GN=SND1 PE=1 SV=1	50	0.685186	28.2313	WT_GBA - CT	4.78939e-07	9.83134e-05	FALSE	candidate	8.3091
STMN3	A0A0J9YW36|Q9NZ72|Q9NZ72-2	Stathmin-3 (Fragment) OS=Homo sapiens GN=STMN3 PE=1 SV=1|Stathmin-3 OS=Homo sapiens GN=STMN3 PE=1 SV=3|Isoform 2 of Stathmin-3 OS=Homo sapiens GN=STMN3	3	0.705387	23.7919	WT_GBA - CT	5.00871e-07	9.83134e-05	FALSE	candidate	6.70299
PTRF	Q6NZI2	Polymerase I and transcript release factor OS=Homo sapiens GN=PTRF PE=1 SV=1	5	-0.892197	23.1917	WT_GBA - CT	5.1251e-07	9.83134e-05	FALSE	candidate	6.36715
KIF5C	O60282	Kinesin heavy chain isoform 5C OS=Homo sapiens GN=KIF5C PE=1 SV=1	16	-0.766707	25.2588	WT_GBA - CT	5.1295e-07	9.83134e-05	FALSE	candidate	6.75973
KDELC1	Q6UW63	KDEL motif-containing protein 1 OS=Homo sapiens GN=KDELC1 PE=1 SV=1	7	-0.908926	24.6997	WT_GBA - CT	5.28223e-07	9.83134e-05	FALSE	candidate	6.76247
HSD17B7	P56937|P56937-2|P56937-3	3-keto-steroid reductase OS=Homo sapiens GN=HSD17B7 PE=1 SV=1|Isoform 2 of 3-keto-steroid reductase OS=Homo sapiens GN=HSD17B7|Isoform 3 of 3-keto-steroid reductase OS=Homo sapiens GN=HSD17B7	5	0.737253	24.6886	WT_GBA - CT	5.57975e-07	9.95799e-05	FALSE	candidate	6.54033
IFT88	Q13099|Q13099-2	Intraflagellar transport protein 88 homolog OS=Homo sapiens GN=IFT88 PE=2 SV=2|Isoform 2 of Intraflagellar transport protein 88 homolog OS=Homo sapiens GN=IFT88	2	-0.593485	22.6589	WT_GBA - CT	5.67453e-07	9.95799e-05	FALSE	candidate	6.07056
ANXA5	P08758	Annexin A5 OS=Homo sapiens GN=ANXA5 PE=1 SV=2	20	0.558262	27.368	WT_GBA - CT	5.98744e-07	0.00010191	FALSE	no hit	8.25457
IFT27	Q9BW83	Intraflagellar transport protein 27 homolog OS=Homo sapiens GN=IFT27 PE=1 SV=1	9	0.59118	24.9042	WT_GBA - CT	6.13915e-07	0.00010191	FALSE	candidate	7.07966
IDI1	Q13907	Isopentenyl-diphosphate Delta-isomerase 1 OS=Homo sapiens GN=IDI1 PE=1 SV=2	8	0.606538	25.0826	WT_GBA - CT	6.32812e-07	0.000102282	FALSE	candidate	7.03558
DNAJC3	Q13217	DnaJ homolog subfamily C member 3 OS=Homo sapiens GN=DNAJC3 PE=1 SV=1	21	0.821623	26.8354	WT_GBA - CT	6.63859e-07	0.000102655	FALSE	candidate	7.2745
CYP51A1	A0A0C4DFL7|Q16850	Lanosterol 14-alpha demethylase OS=Homo sapiens GN=CYP51A1 PE=1 SV=1|Lanosterol 14-alpha demethylase OS=Homo sapiens GN=CYP51A1 PE=1 SV=3	8	0.983971	24.5079	WT_GBA - CT	6.68544e-07	0.000102655	FALSE	candidate	7.48899
PGRMC2	O15173|O15173-2	Membrane-associated progesterone receptor component 2 OS=Homo sapiens GN=PGRMC2 PE=1 SV=1|Isoform 2 of Membrane-associated progesterone receptor component 2 OS=Homo sapiens GN=PGRMC2	9	0.73929	25.4392	WT_GBA - CT	7.50451e-07	0.000111256	FALSE	candidate	7.59032
NUP50	Q9UKX7|Q9UKX7-2	Nuclear pore complex protein Nup50 OS=Homo sapiens GN=NUP50 PE=1 SV=2|Isoform 2 of Nuclear pore complex protein Nup50 OS=Homo sapiens GN=NUP50	23	0.533412	26.9329	WT_GBA - CT	7.60786e-07	0.000111256	FALSE	no hit	7.63809
CA2	P00918	Carbonic anhydrase 2 OS=Homo sapiens GN=CA2 PE=1 SV=2	12	-0.900213	25.0248	WT_GBA - CT	8.43988e-07	0.000117045	FALSE	candidate	7.66409
PRKCZ	Q05513	Protein kinase C zeta type OS=Homo sapiens GN=PRKCZ PE=1 SV=4	4	0.796073	21.9654	WT_GBA - CT	8.49461e-07	0.000117045	FALSE	candidate	5.96793
FAM118A	Q9NWS6	Protein FAM118A OS=Homo sapiens GN=FAM118A PE=1 SV=2	3	0.697331	21.6415	WT_GBA - CT	8.57542e-07	0.000117045	FALSE	candidate	5.89719
NAXD	Q8IW45|Q8IW45-2	ATP-dependent (S)-NAD(P)H-hydrate dehydratase OS=Homo sapiens GN=NAXD PE=1 SV=1|Isoform 2 of ATP-dependent (S)-NAD(P)H-hydrate dehydratase OS=Homo sapiens GN=NAXD	3	-0.697087	22.5579	WT_GBA - CT	9.29544e-07	0.000121087	FALSE	candidate	6.39204
NUS1	Q96E22	Dehydrodolichyl diphosphate synthase complex subunit NUS1 OS=Homo sapiens GN=NUS1 PE=1 SV=1	3	0.845483	23.1693	WT_GBA - CT	9.40879e-07	0.000121087	FALSE	candidate	6.25496
TMED9	Q9BVK6	Transmembrane emp24 domain-containing protein 9 OS=Homo sapiens GN=TMED9 PE=1 SV=2	7	0.646725	25.5165	WT_GBA - CT	9.62253e-07	0.000121087	FALSE	candidate	7.76111
SSR2	P43308	Translocon-associated protein subunit beta OS=Homo sapiens GN=SSR2 PE=1 SV=1	2	0.830349	23.5886	WT_GBA - CT	9.66013e-07	0.000121087	FALSE	candidate	7.24854
PNMA2	Q9UL42	Paraneoplastic antigen Ma2 OS=Homo sapiens GN=PNMA2 PE=1 SV=2	6	-0.687674	24.6083	WT_GBA - CT	1.04042e-06	0.000127806	FALSE	candidate	6.55931
GTPBP1	O00178	GTP-binding protein 1 OS=Homo sapiens GN=GTPBP1 PE=1 SV=3	10	0.546235	24.7846	WT_GBA - CT	1.10055e-06	0.000132541	FALSE	no hit	7.18859
DCXR	J3KS22|J3QS36|Q7Z4W1	L-xylulose reductase (Fragment) OS=Homo sapiens GN=DCXR PE=1 SV=7|L-xylulose reductase (Fragment) OS=Homo sapiens GN=DCXR PE=1 SV=1|L-xylulose reductase OS=Homo sapiens GN=DCXR PE=1 SV=2	8	-0.897881	24.7513	WT_GBA - CT	1.33208e-06	0.00015295	FALSE	candidate	7.20329
ADSL	P30566	Adenylosuccinate lyase OS=Homo sapiens GN=ADSL PE=1 SV=2	14	0.576543	26.9044	WT_GBA - CT	1.34504e-06	0.00015295	FALSE	no hit	7.84555
DNM1	A0A0D9SFB1|A0A0D9SFE4|A0A0U1RQP1|Q05193|Q05193-2|Q05193-3|Q05193-5	Dynamin-1 OS=Homo sapiens GN=DNM1 PE=1 SV=1|Dynamin-1 OS=Homo sapiens GN=DNM1 PE=1 SV=1|Dynamin-1 OS=Homo sapiens GN=DNM1 PE=1 SV=1|Dynamin-1 OS=Homo sapiens GN=DNM1 PE=1 SV=2|Isoform 2 of Dynamin-1 OS=Homo sapiens GN=DNM1|Isoform 3 of Dynamin-1 OS=Homo sapiens GN=DNM1|Isoform 4 of Dynamin-1 OS=Homo sapiens GN=DNM1	6	-0.473595	24.891	WT_GBA - CT	1.35553e-06	0.00015295	FALSE	no hit	6.58562
SLC39A14	Q15043|Q15043-2|Q15043-3	Zinc transporter ZIP14 OS=Homo sapiens GN=SLC39A14 PE=1 SV=3|Isoform 2 of Zinc transporter ZIP14 OS=Homo sapiens GN=SLC39A14|Isoform 3 of Zinc transporter ZIP14 OS=Homo sapiens GN=SLC39A14	6	0.591969	25.5252	WT_GBA - CT	1.36963e-06	0.00015295	FALSE	candidate	7.22097
RFTN1	G3XAJ6|Q14699	Raft-linking protein, isoform CRA_c OS=Homo sapiens GN=RFTN1 PE=1 SV=1|Raftlin OS=Homo sapiens GN=RFTN1 PE=1 SV=4	4	-0.616737	24.2046	WT_GBA - CT	1.41866e-06	0.000153399	FALSE	candidate	6.37889
DLD	P09622	Dihydrolipoyl dehydrogenase, mitochondrial OS=Homo sapiens GN=DLD PE=1 SV=2	17	0.630326	27.1877	WT_GBA - CT	1.43511e-06	0.000153399	FALSE	candidate	8.18389
LPCAT2	Q7L5N7	Lysophosphatidylcholine acyltransferase 2 OS=Homo sapiens GN=LPCAT2 PE=1 SV=1	2	-0.775171	21.8951	WT_GBA - CT	1.44858e-06	0.000153399	FALSE	candidate	6.25501
TRMT11	Q7Z4G4|Q7Z4G4-2	tRNA (guanine(10)-N2)-methyltransferase homolog OS=Homo sapiens GN=TRMT11 PE=1 SV=1|Isoform 2 of tRNA (guanine(10)-N2)-methyltransferase homolog OS=Homo sapiens GN=TRMT11	4	-0.467394	24.5259	WT_GBA - CT	1.67929e-06	0.000174817	FALSE	no hit	6.65806
MIEF1	B0QY95|Q9NQG6	Mitochondrial dynamics protein MID51 OS=Homo sapiens GN=MIEF1 PE=1 SV=1|Mitochondrial dynamics protein MID51 OS=Homo sapiens GN=MIEF1 PE=1 SV=1	4	0.554246	23.5795	WT_GBA - CT	2.02674e-06	0.000205373	FALSE	no hit	6.61695
MINA	Q8IUF8|Q8IUF8-4	Bifunctional lysine-specific demethylase and histidyl-hydroxylase MINA OS=Homo sapiens GN=MINA PE=1 SV=1|Isoform 4 of Bifunctional lysine-specific demethylase and histidyl-hydroxylase MINA OS=Homo sapiens GN=MINA	8	-0.654836	24.5848	WT_GBA - CT	2.04563e-06	0.000205373	FALSE	candidate	6.76127
GPX4	A0A087WT12|A0A087X2I2|P36969|P36969-2	Glutathione peroxidase OS=Homo sapiens GN=GPX4 PE=1 SV=1|Glutathione peroxidase OS=Homo sapiens GN=GPX4 PE=1 SV=1|Phospholipid hydroperoxide glutathione peroxidase, mitochondrial OS=Homo sapiens GN=GPX4 PE=1 SV=3|Isoform Cytoplasmic of Phospholipid hydroperoxide glutathione peroxidase, mitochondrial OS=Homo sapiens GN=GPX4	7	-0.786532	24.9591	WT_GBA - CT	2.07313e-06	0.000205373	FALSE	candidate	7.07395
TTLL12	Q14166	Tubulin--tyrosine ligase-like protein 12 OS=Homo sapiens GN=TTLL12 PE=1 SV=2	22	0.503442	26.0062	WT_GBA - CT	2.16236e-06	0.000210813	FALSE	no hit	7.62743
GNB4	Q9HAV0	Guanine nucleotide-binding protein subunit beta-4 OS=Homo sapiens GN=GNB4 PE=1 SV=3	2	-0.553983	23.2085	WT_GBA - CT	2.3012e-06	0.000220844	FALSE	no hit	6.20685
IAH1	H7C5G1|Q2TAA2	Isoamyl acetate-hydrolyzing esterase 1 homolog (Fragment) OS=Homo sapiens GN=IAH1 PE=1 SV=1|Isoamyl acetate-hydrolyzing esterase 1 homolog OS=Homo sapiens GN=IAH1 PE=1 SV=1	4	0.63089	23.6471	WT_GBA - CT	2.33731e-06	0.000220858	FALSE	candidate	7.19923
ACO2	A2A274|Q99798	Aconitate hydratase, mitochondrial OS=Homo sapiens GN=ACO2 PE=1 SV=1|Aconitate hydratase, mitochondrial OS=Homo sapiens GN=ACO2 PE=1 SV=2	33	0.601224	27.1846	WT_GBA - CT	2.44824e-06	0.000225345	FALSE	candidate	7.77297
RABGAP1	Q9Y3P9	Rab GTPase-activating protein 1 OS=Homo sapiens GN=RABGAP1 PE=1 SV=3	15	-0.487128	25.6073	WT_GBA - CT	2.47045e-06	0.000225345	FALSE	no hit	6.71897
FAM213A	Q9BRX8|Q9BRX8-2	Redox-regulatory protein FAM213A OS=Homo sapiens GN=FAM213A PE=1 SV=3|Isoform 2 of Redox-regulatory protein FAM213A OS=Homo sapiens GN=FAM213A	5	0.726991	24.325	WT_GBA - CT	2.49487e-06	0.000225345	FALSE	candidate	6.65989
ARHGEF7	B1ALK7|Q14155-1|Q14155-5	Rho guanine nucleotide exchange factor 7 OS=Homo sapiens GN=ARHGEF7 PE=1 SV=1|Isoform 1 of Rho guanine nucleotide exchange factor 7 OS=Homo sapiens GN=ARHGEF7|Isoform 5 of Rho guanine nucleotide exchange factor 7 OS=Homo sapiens GN=ARHGEF7	11	-0.493481	25.1537	WT_GBA - CT	2.62209e-06	0.000233404	FALSE	no hit	6.95079
OXCT1	P55809	Succinyl-CoA:3-ketoacid coenzyme A transferase 1, mitochondrial OS=Homo sapiens GN=OXCT1 PE=1 SV=1	10	-0.518265	25.8708	WT_GBA - CT	2.89319e-06	0.000253857	FALSE	no hit	7.63386
TMED10	P49755	Transmembrane emp24 domain-containing protein 10 OS=Homo sapiens GN=TMED10 PE=1 SV=2	10	0.506893	25.4497	WT_GBA - CT	3.01892e-06	0.000261158	FALSE	no hit	7.69238
ERCC5	A0A087WUH0|P28715	DNA repair protein-complementing XP-G cells OS=Homo sapiens GN=ERCC5 PE=1 SV=1|DNA repair protein complementing XP-G cells OS=Homo sapiens GN=ERCC5 PE=1 SV=3	5	-0.48232	23.8843	WT_GBA - CT	3.34986e-06	0.000284983	FALSE	no hit	6.22142
HSPA4L	O95757	Heat shock 70 kDa protein 4L OS=Homo sapiens GN=HSPA4L PE=1 SV=3	34	0.468577	27.3413	WT_GBA - CT	3.38713e-06	0.000284983	FALSE	no hit	7.6632
TES	Q9UGI8|Q9UGI8-2	Testin OS=Homo sapiens GN=TES PE=1 SV=1|Isoform 2 of Testin OS=Homo sapiens GN=TES	23	0.57439	27.4319	WT_GBA - CT	3.59555e-06	0.000293677	FALSE	no hit	7.90247
USO1	O60763|O60763-2	General vesicular transport factor p115 OS=Homo sapiens GN=USO1 PE=1 SV=2|Isoform 2 of General vesicular transport factor p115 OS=Homo sapiens GN=USO1	36	0.437434	27.4131	WT_GBA - CT	3.68165e-06	0.000293677	FALSE	no hit	7.73144
LETMD1	F8VP71|F8VVQ3|F8VZA2|Q6P1Q0|Q6P1Q0-2|Q6P1Q0-4|Q6P1Q0-7	LETM1 domain-containing protein 1 OS=Homo sapiens GN=LETMD1 PE=1 SV=1|LETM1 domain-containing protein 1 (Fragment) OS=Homo sapiens GN=LETMD1 PE=1 SV=7|LETM1 domain-containing protein 1 (Fragment) OS=Homo sapiens GN=LETMD1 PE=1 SV=7|LETM1 domain-containing protein 1 OS=Homo sapiens GN=LETMD1 PE=1 SV=1|Isoform 2 of LETM1 domain-containing protein 1 OS=Homo sapiens GN=LETMD1|Isoform 4 of LETM1 domai…	3	0.509422	22.1641	WT_GBA - CT	3.77812e-06	0.000293677	FALSE	no hit	6.11635
TMED7|TICAM2	A0A0A6YYA0|Q86XR7-2|Q9Y3B3|Q9Y3B3-2	Protein TMED7-TICAM2 OS=Homo sapiens GN=TMED7-TICAM2 PE=3 SV=1|Isoform 2 of TIR domain-containing adapter molecule 2 OS=Homo sapiens GN=TICAM2|Transmembrane emp24 domain-containing protein 7 OS=Homo sapiens GN=TMED7 PE=1 SV=2|Isoform 2 of Transmembrane emp24 domain-containing protein 7 OS=Homo sapiens GN=TMED7	3	0.547807	23.886	WT_GBA - CT	3.8006e-06	0.000293677	FALSE	no hit	7.44883
ENO2	P09104	Gamma-enolase OS=Homo sapiens GN=ENO2 PE=1 SV=3	13	-0.731131	25.309	WT_GBA - CT	3.87497e-06	0.000293677	FALSE	candidate	7.54925
RNF14	Q9UBS8	E3 ubiquitin-protein ligase RNF14 OS=Homo sapiens GN=RNF14 PE=1 SV=1	4	0.750555	23.498	WT_GBA - CT	3.88874e-06	0.000293677	FALSE	candidate	6.2428
ARFGAP3	H0Y6A0|Q9NP61|Q9NP61-2	ADP-ribosylation factor GTPase-activating protein 3 (Fragment) OS=Homo sapiens GN=ARFGAP3 PE=1 SV=1|ADP-ribosylation factor GTPase-activating protein 3 OS=Homo sapiens GN=ARFGAP3 PE=1 SV=1|Isoform 2 of ADP-ribosylation factor GTPase-activating protein 3 OS=Homo sapiens GN=ARFGAP3	16	0.538527	26.1176	WT_GBA - CT	3.92694e-06	0.000293677	FALSE	no hit	7.06473
THEM4	Q5T1C6	Acyl-coenzyme A thioesterase THEM4 OS=Homo sapiens GN=THEM4 PE=1 SV=1	3	0.491723	22.7754	WT_GBA - CT	3.92706e-06	0.000293677	FALSE	no hit	6.19502
PDIA3	H7BZJ3|P30101	Protein disulfide-isomerase A3 (Fragment) OS=Homo sapiens GN=PDIA3 PE=1 SV=1|Protein disulfide-isomerase A3 OS=Homo sapiens GN=PDIA3 PE=1 SV=4	40	0.550129	28.215	WT_GBA - CT	3.95136e-06	0.000293677	FALSE	no hit	8.77997
PGD	P52209|P52209-2	6-phosphogluconate dehydrogenase, decarboxylating OS=Homo sapiens GN=PGD PE=1 SV=3|Isoform 2 of 6-phosphogluconate dehydrogenase, decarboxylating OS=Homo sapiens GN=PGD	24	0.530774	27.6459	WT_GBA - CT	3.96861e-06	0.000293677	FALSE	no hit	8.23153
TMEM199	J3KS81|Q8N511	Transmembrane protein 199 OS=Homo sapiens GN=TMEM199 PE=1 SV=1|Transmembrane protein 199 OS=Homo sapiens GN=TMEM199 PE=1 SV=1	4	0.532603	23.5179	WT_GBA - CT	4.53528e-06	0.00032866	FALSE	no hit	6.45428
CAP2	E9PDI2|P40123	Adenylyl cyclase-associated protein OS=Homo sapiens GN=CAP2 PE=1 SV=1|Adenylyl cyclase-associated protein 2 OS=Homo sapiens GN=CAP2 PE=1 SV=1	13	0.667128	25.3778	WT_GBA - CT	4.54837e-06	0.00032866	FALSE	candidate	7.18432
EPPK1	A0A087X1U6|P58107	Epiplakin OS=Homo sapiens GN=EPPK1 PE=1 SV=1|Epiplakin OS=Homo sapiens GN=EPPK1 PE=1 SV=2	51	-0.869802	27.0532	WT_GBA - CT	4.93212e-06	0.000352245	FALSE	candidate	7.36167
MAP7D2	Q96T17|Q96T17-2	MAP7 domain-containing protein 2 OS=Homo sapiens GN=MAP7D2 PE=1 SV=2|Isoform 2 of MAP7 domain-containing protein 2 OS=Homo sapiens GN=MAP7D2	11	-1.54605	25.1521	WT_GBA - CT	5.13462e-06	0.000362493	TRUE	hit	6.73176
BAIAP2L1	Q9UHR4	Brain-specific angiogenesis inhibitor 1-associated protein 2-like protein 1 OS=Homo sapiens GN=BAIAP2L1 PE=1 SV=2	22	0.418867	26.7993	WT_GBA - CT	5.23208e-06	0.000365176	FALSE	no hit	7.15085
NFKB2	Q00653|Q00653-4	Nuclear factor NF-kappa-B p100 subunit OS=Homo sapiens GN=NFKB2 PE=1 SV=4|Isoform 4 of Nuclear factor NF-kappa-B p100 subunit OS=Homo sapiens GN=NFKB2	10	-0.496197	25.1128	WT_GBA - CT	5.46894e-06	0.000377419	FALSE	no hit	6.75158
APOL2	J3KQL8|Q9BQE5	Apolipoprotein L2 OS=Homo sapiens GN=APOL2 PE=1 SV=2|Apolipoprotein L2 OS=Homo sapiens GN=APOL2 PE=1 SV=1	4	0.536033	23.4819	WT_GBA - CT	5.81654e-06	0.000391846	FALSE	no hit	6.77759
TRMU	O75648	Mitochondrial tRNA-specific 2-thiouridylase 1 OS=Homo sapiens GN=TRMU PE=1 SV=2	5	0.47367	24.0009	WT_GBA - CT	5.85327e-06	0.000391846	FALSE	no hit	6.85261
ADI1	Q9BV57	1,2-dihydroxy-3-keto-5-methylthiopentene dioxygenase OS=Homo sapiens GN=ADI1 PE=1 SV=1	8	-0.815358	24.9834	WT_GBA - CT	5.8694e-06	0.000391846	FALSE	candidate	7.68036
MAD2L1	Q13257	Mitotic spindle assembly checkpoint protein MAD2A OS=Homo sapiens GN=MAD2L1 PE=1 SV=1	7	0.709843	24.9112	WT_GBA - CT	6.09624e-06	0.000402614	FALSE	candidate	7.40287
PMM1	Q92871	Phosphomannomutase 1 OS=Homo sapiens GN=PMM1 PE=1 SV=2	5	0.53026	23.5734	WT_GBA - CT	6.28046e-06	0.000410368	FALSE	no hit	6.41961
UGGT2	Q9NYU1	UDP-glucose:glycoprotein glucosyltransferase 2 OS=Homo sapiens GN=UGGT2 PE=1 SV=4	4	-0.565935	22.5774	WT_GBA - CT	6.58754e-06	0.000422428	FALSE	no hit	5.93567
DESI1	Q6ICB0	Desumoylating isopeptidase 1 OS=Homo sapiens GN=DESI1 PE=1 SV=1	2	0.569647	23.6383	WT_GBA - CT	6.6117e-06	0.000422428	FALSE	no hit	6.78949
PACSIN2	Q9UNF0|Q9UNF0-2	Protein kinase C and casein kinase substrate in neurons protein 2 OS=Homo sapiens GN=PACSIN2 PE=1 SV=2|Isoform 2 of Protein kinase C and casein kinase substrate in neurons protein 2 OS=Homo sapiens GN=PACSIN2	18	0.481767	26.6003	WT_GBA - CT	6.68427e-06	0.000422428	FALSE	no hit	7.5734
UBE4B	O95155|O95155-2|O95155-4	Ubiquitin conjugation factor E4 B OS=Homo sapiens GN=UBE4B PE=1 SV=1|Isoform 2 of Ubiquitin conjugation factor E4 B OS=Homo sapiens GN=UBE4B|Isoform 4 of Ubiquitin conjugation factor E4 B OS=Homo sapiens GN=UBE4B	13	0.408638	25.2322	WT_GBA - CT	6.74014e-06	0.000422428	FALSE	no hit	7.03228
TUBGCP3	Q96CW5	Gamma-tubulin complex component 3 OS=Homo sapiens GN=TUBGCP3 PE=1 SV=2	10	-0.488479	24.8116	WT_GBA - CT	6.86658e-06	0.000426005	FALSE	no hit	7.35877
ATP5J2	G3V325|P56134-3	Protein ATP5J2-PTCD1 OS=Homo sapiens GN=ATP5J2-PTCD1 PE=4 SV=1|Isoform 3 of ATP synthase subunit f, mitochondrial OS=Homo sapiens GN=ATP5J2	10	0.395205	24.7651	WT_GBA - CT	7.20408e-06	0.000442475	FALSE	no hit	6.86667
ARID3A	Q99856	AT-rich interactive domain-containing protein 3A OS=Homo sapiens GN=ARID3A PE=1 SV=2	4	-0.63158	23.579	WT_GBA - CT	7.36056e-06	0.000447267	FALSE	candidate	6.62931
PFKP	Q01813	ATP-dependent 6-phosphofructokinase, platelet type OS=Homo sapiens GN=PFKP PE=1 SV=2	22	-0.409897	26.7089	WT_GBA - CT	7.42775e-06	0.000447267	FALSE	no hit	7.85149
UGDH	O60701	UDP-glucose 6-dehydrogenase OS=Homo sapiens GN=UGDH PE=1 SV=1	16	0.406411	25.5624	WT_GBA - CT	7.52725e-06	0.000448858	FALSE	no hit	7.41514
FSCN1	Q16658	Fascin OS=Homo sapiens GN=FSCN1 PE=1 SV=3	19	-0.604078	26.1953	WT_GBA - CT	7.75575e-06	0.000458037	FALSE	candidate	7.9059
NMNAT1	Q9HAN9	Nicotinamide/nicotinic acid mononucleotide adenylyltransferase 1 OS=Homo sapiens GN=NMNAT1 PE=1 SV=1	6	0.425515	24.4058	WT_GBA - CT	7.96517e-06	0.000465924	FALSE	no hit	6.5908
A2M	P01023	Alpha-2-macroglobulin OS=Homo sapiens GN=A2M PE=1 SV=3	2	1.89626	23.351	WT_GBA - CT	8.19017e-06	0.000474566	TRUE	hit	6.47338
GMPPA	Q96IJ6	Mannose-1-phosphate guanyltransferase alpha OS=Homo sapiens GN=GMPPA PE=1 SV=1	8	0.409779	24.864	WT_GBA - CT	8.49873e-06	0.000485117	FALSE	no hit	7.11467
TMEM102	Q8N9M5	Transmembrane protein 102 OS=Homo sapiens GN=TMEM102 PE=1 SV=1	2	-0.705225	20.7025	WT_GBA - CT	8.53023e-06	0.000485117	FALSE	candidate	5.7294
LXN	Q9BS40	Latexin OS=Homo sapiens GN=LXN PE=1 SV=2	3	-0.506706	23.4075	WT_GBA - CT	8.80625e-06	0.00049622	FALSE	no hit	6.70421
ME1	P48163	NADP-dependent malic enzyme OS=Homo sapiens GN=ME1 PE=1 SV=1	14	-0.3948	25.6136	WT_GBA - CT	9.03884e-06	0.000504696	FALSE	no hit	7.50662
FIS1	Q9Y3D6	Mitochondrial fission 1 protein OS=Homo sapiens GN=FIS1 PE=1 SV=2	3	0.558374	23.2835	WT_GBA - CT	9.27124e-06	0.000511223	FALSE	no hit	6.59239
RAB23	Q9ULC3	Ras-related protein Rab-23 OS=Homo sapiens GN=RAB23 PE=1 SV=1	5	-0.501929	23.4497	WT_GBA - CT	9.3222e-06	0.000511223	FALSE	no hit	6.43043
DHX34	Q14147	Probable ATP-dependent RNA helicase DHX34 OS=Homo sapiens GN=DHX34 PE=1 SV=2	12	0.40965	24.897	WT_GBA - CT	9.50838e-06	0.000516819	FALSE	no hit	6.511
TMED2	Q15363	Transmembrane emp24 domain-containing protein 2 OS=Homo sapiens GN=TMED2 PE=1 SV=1	6	0.444997	25.6651	WT_GBA - CT	9.67803e-06	0.000518808	FALSE	no hit	7.62955
NFRKB	Q6P4R8|Q6P4R8-2|Q6P4R8-3	Nuclear factor related to kappa-B-binding protein OS=Homo sapiens GN=NFRKB PE=1 SV=2|Isoform 2 of Nuclear factor related to kappa-B-binding protein OS=Homo sapiens GN=NFRKB|Isoform 3 of Nuclear factor related to kappa-B-binding protein OS=Homo sapiens GN=NFRKB	6	0.563515	23.3105	WT_GBA - CT	9.71392e-06	0.000518808	FALSE	no hit	6.5466
ACAD11	Q709F0	Acyl-CoA dehydrogenase family member 11 OS=Homo sapiens GN=ACAD11 PE=1 SV=2	6	-0.542638	24.0317	WT_GBA - CT	1.09568e-05	0.000580146	FALSE	no hit	6.61021
ATXN10	Q9UBB4|Q9UBB4-2	Ataxin-10 OS=Homo sapiens GN=ATXN10 PE=1 SV=1|Isoform 2 of Ataxin-10 OS=Homo sapiens GN=ATXN10	17	0.473483	26.3019	WT_GBA - CT	1.14457e-05	0.00060085	FALSE	no hit	7.32693
ACP1	P24666|P24666-2	Low molecular weight phosphotyrosine protein phosphatase OS=Homo sapiens GN=ACP1 PE=1 SV=3|Isoform 2 of Low molecular weight phosphotyrosine protein phosphatase OS=Homo sapiens GN=ACP1	8	-0.554772	25.1789	WT_GBA - CT	1.16896e-05	0.000608453	FALSE	no hit	7.64208
UNK	Q9C0B0	RING finger protein unkempt homolog OS=Homo sapiens GN=UNK PE=1 SV=2	7	-0.423692	24.6828	WT_GBA - CT	1.24825e-05	0.00063892	FALSE	no hit	6.64722
ACOX1	Q15067|Q15067-2	Peroxisomal acyl-coenzyme A oxidase 1 OS=Homo sapiens GN=ACOX1 PE=1 SV=3|Isoform 2 of Peroxisomal acyl-coenzyme A oxidase 1 OS=Homo sapiens GN=ACOX1	7	-0.619937	23.9548	WT_GBA - CT	1.2483e-05	0.00063892	FALSE	candidate	6.84699
MKL1	W0Z7M9	MKL/myocardin-like protein 1 OS=Homo sapiens GN=mkl1 PE=1 SV=1	5	0.484871	24.1047	WT_GBA - CT	1.30905e-05	0.000664476	FALSE	no hit	6.49368
SSR4	P51571	Translocon-associated protein subunit delta OS=Homo sapiens GN=SSR4 PE=1 SV=1	4	0.634619	23.3024	WT_GBA - CT	1.35379e-05	0.000674289	FALSE	candidate	7.35401
MTMR4	J3QR65|Q9NYA4	Myotubularin-related protein 4 OS=Homo sapiens GN=MTMR4 PE=1 SV=1|Myotubularin-related protein 4 OS=Homo sapiens GN=MTMR4 PE=1 SV=2	4	0.652258	22.7689	WT_GBA - CT	1.35659e-05	0.000674289	FALSE	candidate	6.11427
GIT2	Q14161	ARF GTPase-activating protein GIT2 OS=Homo sapiens GN=GIT2 PE=1 SV=2	7	-0.533233	24.4304	WT_GBA - CT	1.36131e-05	0.000674289	FALSE	no hit	6.69037
HOXB9	P17482	Homeobox protein Hox-B9 OS=Homo sapiens GN=HOXB9 PE=1 SV=2	5	0.430369	23.8277	WT_GBA - CT	1.38532e-05	0.000680691	FALSE	no hit	6.62072
NEU1	Q99519	Sialidase-1 OS=Homo sapiens GN=NEU1 PE=1 SV=1	3	0.569284	23.4245	WT_GBA - CT	1.39836e-05	0.000681645	FALSE	no hit	6.45559
PPT2	A0A024RCQ8|A0A0G2JH76|A0A140T8X7|Q9UMR5|Q9UMR5-3	HCG1999928, isoform CRA_a OS=Homo sapiens GN=PPT2 PE=1 SV=1|Lysosomal thioesterase PPT2 OS=Homo sapiens GN=PPT2 PE=1 SV=1|Lysosomal thioesterase PPT2 OS=Homo sapiens GN=PPT2 PE=1 SV=1|Lysosomal thioesterase PPT2 OS=Homo sapiens GN=PPT2 PE=1 SV=4|Isoform 3 of Lysosomal thioesterase PPT2 OS=Homo sapiens GN=PPT2	2	0.636484	23.2986	WT_GBA - CT	1.42051e-05	0.000684476	FALSE	candidate	6.64665
MAGT1	A0A087WU53|Q9H0U3	Magnesium transporter protein 1 OS=Homo sapiens GN=MAGT1 PE=1 SV=1|Magnesium transporter protein 1 OS=Homo sapiens GN=MAGT1 PE=1 SV=1	5	0.463242	24.3264	WT_GBA - CT	1.42646e-05	0.000684476	FALSE	no hit	7.58445
SSR1	C9IZQ1|C9J3L8|C9J5W0|E9PAL7|P43307	Translocon-associated protein subunit alpha OS=Homo sapiens GN=SSR1 PE=1 SV=1|Translocon-associated protein subunit alpha OS=Homo sapiens GN=SSR1 PE=1 SV=3	3	0.584928	23.0257	WT_GBA - CT	1.50779e-05	0.000717894	FALSE	no hit	6.00896
LRRC47	Q8N1G4	Leucine-rich repeat-containing protein 47 OS=Homo sapiens GN=LRRC47 PE=1 SV=1	23	0.400144	26.5203	WT_GBA - CT	1.53237e-05	0.000723986	FALSE	no hit	7.7898
WDR1	O75083	WD repeat-containing protein 1 OS=Homo sapiens GN=WDR1 PE=1 SV=4	25	-0.380933	27.0892	WT_GBA - CT	1.5468e-05	0.000725226	FALSE	no hit	7.78764
SSR3	C9JA28|Q9UNL2|Q9UNL2-2	Translocon-associated protein subunit gamma OS=Homo sapiens GN=SSR3 PE=1 SV=1|Translocon-associated protein subunit gamma OS=Homo sapiens GN=SSR3 PE=1 SV=1|Isoform 2 of Translocon-associated protein subunit gamma OS=Homo sapiens GN=SSR3	3	0.668096	24.3308	WT_GBA - CT	1.5896e-05	0.000735632	FALSE	candidate	7.58114
HOOK3	H0YDM4|Q86VS8	Protein Hook homolog 3 (Fragment) OS=Homo sapiens GN=HOOK3 PE=1 SV=1|Protein Hook homolog 3 OS=Homo sapiens GN=HOOK3 PE=1 SV=2	18	-0.409146	26.0364	WT_GBA - CT	1.59295e-05	0.000735632	FALSE	no hit	6.94304
DPYSL5	Q9BPU6	Dihydropyrimidinase-related protein 5 OS=Homo sapiens GN=DPYSL5 PE=1 SV=1	18	-0.365386	26.1623	WT_GBA - CT	1.64037e-05	0.000738902	FALSE	no hit	7.46194
TRABD	J3KPT4|Q9H4I3	TraB domain-containing protein OS=Homo sapiens GN=TRABD PE=1 SV=1|TraB domain-containing protein OS=Homo sapiens GN=TRABD PE=1 SV=1	4	0.578846	23.8262	WT_GBA - CT	1.64447e-05	0.000738902	FALSE	no hit	6.77492
CARS2	Q9HA77	Probable cysteine--tRNA ligase, mitochondrial OS=Homo sapiens GN=CARS2 PE=1 SV=1	11	-0.505598	25.4114	WT_GBA - CT	1.65479e-05	0.000738902	FALSE	no hit	7.21296
SLC33A1	O00400	Acetyl-coenzyme A transporter 1 OS=Homo sapiens GN=SLC33A1 PE=1 SV=1	5	0.547173	24.5235	WT_GBA - CT	1.65737e-05	0.000738902	FALSE	no hit	6.70307
TTC33	Q6PID6	Tetratricopeptide repeat protein 33 OS=Homo sapiens GN=TTC33 PE=1 SV=2	3	0.490848	23.6261	WT_GBA - CT	1.66018e-05	0.000738902	FALSE	no hit	6.5505
HSPA13	P48723	Heat shock 70 kDa protein 13 OS=Homo sapiens GN=HSPA13 PE=1 SV=1	3	0.871895	21.2895	WT_GBA - CT	1.72743e-05	0.000759593	FALSE	candidate	5.94036
CSTF2T	Q9H0L4	Cleavage stimulation factor subunit 2 tau variant OS=Homo sapiens GN=CSTF2T PE=1 SV=1	7	-0.459158	24.3038	WT_GBA - CT	1.73644e-05	0.000759593	FALSE	no hit	7.02305
PACS1	Q6VY07|Q6VY07-2	Phosphofurin acidic cluster sorting protein 1 OS=Homo sapiens GN=PACS1 PE=1 SV=2|Isoform 2 of Phosphofurin acidic cluster sorting protein 1 OS=Homo sapiens GN=PACS1	2	-0.371969	23.335	WT_GBA - CT	1.75868e-05	0.000759593	FALSE	no hit	6.47327
RNF126	K7EIY6|Q9BV68|Q9BV68-2	E3 ubiquitin-protein ligase RNF126 (Fragment) OS=Homo sapiens GN=RNF126 PE=1 SV=6|E3 ubiquitin-protein ligase RNF126 OS=Homo sapiens GN=RNF126 PE=1 SV=1|Isoform 2 of E3 ubiquitin-protein ligase RNF126 OS=Homo sapiens GN=RNF126	4	-0.677042	23.3388	WT_GBA - CT	1.77272e-05	0.000759593	FALSE	candidate	7.0826
WARS	P23381	Tryptophan--tRNA ligase, cytoplasmic OS=Homo sapiens GN=WARS PE=1 SV=2	19	0.427626	27.2785	WT_GBA - CT	1.78463e-05	0.000759593	FALSE	no hit	8.07545
CDK5	Q00535	Cyclin-dependent-like kinase 5 OS=Homo sapiens GN=CDK5 PE=1 SV=3	7	0.49968	24.0181	WT_GBA - CT	1.79279e-05	0.000759593	FALSE	no hit	6.9837
BCL2L13	A0A087WTL4|A0A087WX97|Q9BXK5	Bcl-2-like protein 13 OS=Homo sapiens GN=BCL2L13 PE=1 SV=1|Bcl-2-like protein 13 OS=Homo sapiens GN=BCL2L13 PE=1 SV=1|Bcl-2-like protein 13 OS=Homo sapiens GN=BCL2L13 PE=1 SV=1	2	-0.538598	22.4064	WT_GBA - CT	1.79324e-05	0.000759593	FALSE	no hit	6.25156
DHDDS	Q86SQ9|Q86SQ9-2|Q86SQ9-3|Q86SQ9-4	Dehydrodolichyl diphosphate synthase complex subunit DHDDS OS=Homo sapiens GN=DHDDS PE=1 SV=3|Isoform 2 of Dehydrodolichyl diphosphate synthase complex subunit DHDDS OS=Homo sapiens GN=DHDDS|Isoform 3 of Dehydrodolichyl diphosphate synthase complex subunit DHDDS OS=Homo sapiens GN=DHDDS|Isoform 4 of Dehydrodolichyl diphosphate synthase complex subunit DHDDS OS=Homo sapiens GN=DHDDS	2	0.508076	21.7054	WT_GBA - CT	1.84307e-05	0.00077535	FALSE	no hit	5.78834
PC	P11498	Pyruvate carboxylase, mitochondrial OS=Homo sapiens GN=PC PE=1 SV=2	19	0.360725	25.67	WT_GBA - CT	1.87451e-05	0.000783214	FALSE	no hit	7.00948
ITSN1	Q15811|Q15811-8	Intersectin-1 OS=Homo sapiens GN=ITSN1 PE=1 SV=3|Isoform 8 of Intersectin-1 OS=Homo sapiens GN=ITSN1	17	0.362551	25.8993	WT_GBA - CT	2.02229e-05	0.000839251	FALSE	no hit	6.7282
UBE2H	C9JZY6|P62256	Ubiquitin-conjugating enzyme E2 H (Fragment) OS=Homo sapiens GN=UBE2H PE=1 SV=1|Ubiquitin-conjugating enzyme E2 H OS=Homo sapiens GN=UBE2H PE=1 SV=1	6	0.517016	24.8577	WT_GBA - CT	2.06847e-05	0.000852656	FALSE	no hit	6.86022
NCSTN	Q92542|Q92542-2	Nicastrin OS=Homo sapiens GN=NCSTN PE=1 SV=2|Isoform 2 of Nicastrin OS=Homo sapiens GN=NCSTN	8	0.427538	25.2191	WT_GBA - CT	2.1088e-05	0.000863484	FALSE	no hit	7.34909
C15ORF39	H3BMJ2|Q6ZRI6-2	Uncharacterized protein C15orf39 (Fragment) OS=Homo sapiens GN=C15orf39 PE=1 SV=1|Isoform 2 of Uncharacterized protein C15orf39 OS=Homo sapiens GN=C15orf39	7	0.462946	24.0056	WT_GBA - CT	2.17258e-05	0.000883709	FALSE	no hit	6.46563
IGF2BP3	O00425	Insulin-like growth factor 2 mRNA-binding protein 3 OS=Homo sapiens GN=IGF2BP3 PE=1 SV=2	24	0.399061	26.9747	WT_GBA - CT	2.19301e-05	0.000886149	FALSE	no hit	7.57334
LASP1	Q14847	LIM and SH3 domain protein 1 OS=Homo sapiens GN=LASP1 PE=1 SV=2	16	-0.407208	26.5398	WT_GBA - CT	2.23812e-05	0.000898466	FALSE	no hit	7.71557
TTC38	Q5R3I4	Tetratricopeptide repeat protein 38 OS=Homo sapiens GN=TTC38 PE=1 SV=1	2	0.408219	22.8046	WT_GBA - CT	2.28113e-05	0.000909784	FALSE	no hit	6.43032
CYB5R3	P00387|P00387-2|P00387-3	NADH-cytochrome b5 reductase 3 OS=Homo sapiens GN=CYB5R3 PE=1 SV=3|Isoform 2 of NADH-cytochrome b5 reductase 3 OS=Homo sapiens GN=CYB5R3|Isoform 3 of NADH-cytochrome b5 reductase 3 OS=Homo sapiens GN=CYB5R3	12	0.461227	25.6626	WT_GBA - CT	2.2978e-05	0.000910521	FALSE	no hit	7.79063
PUS7	Q96PZ0	Pseudouridylate synthase 7 homolog OS=Homo sapiens GN=PUS7 PE=1 SV=2	23	0.430544	26.521	WT_GBA - CT	2.40217e-05	0.000938299	FALSE	no hit	7.40093
FARP1	C9JME2|Q9Y4F1|Q9Y4F1-2	FERM, RhoGEF and pleckstrin domain-containing protein 1 OS=Homo sapiens GN=FARP1 PE=1 SV=2|FERM, RhoGEF and pleckstrin domain-containing protein 1 OS=Homo sapiens GN=FARP1 PE=1 SV=1|Isoform 2 of FERM, RhoGEF and pleckstrin domain-containing protein 1 OS=Homo sapiens GN=FARP1	5	-0.604155	23.3227	WT_GBA - CT	2.4056e-05	0.000938299	FALSE	candidate	6.44231
C12ORF73	Q69YU5	Uncharacterized protein C12orf73 OS=Homo sapiens GN=C12orf73 PE=3 SV=2	3	-0.458533	23.1201	WT_GBA - CT	2.4249e-05	0.000938299	FALSE	no hit	6.70262
CORO1A	P31146	Coronin-1A OS=Homo sapiens GN=CORO1A PE=1 SV=4	3	-0.387977	23.3743	WT_GBA - CT	2.43811e-05	0.000938299	FALSE	no hit	6.42232
ATP6V1H	Q9UI12|Q9UI12-2	V-type proton ATPase subunit H OS=Homo sapiens GN=ATP6V1H PE=1 SV=1|Isoform 2 of V-type proton ATPase subunit H OS=Homo sapiens GN=ATP6V1H	7	-0.32868	24.8964	WT_GBA - CT	2.44428e-05	0.000938299	FALSE	no hit	7.1551
EDEM3	Q9BZQ6-2	Isoform 2 of ER degradation-enhancing alpha-mannosidase-like protein 3 OS=Homo sapiens GN=EDEM3	8	0.520946	23.947	WT_GBA - CT	2.48817e-05	0.000949214	FALSE	no hit	6.43495
CBR3	O75828	Carbonyl reductase [NADPH] 3 OS=Homo sapiens GN=CBR3 PE=1 SV=3	9	-0.380794	24.5788	WT_GBA - CT	2.55185e-05	0.000966703	FALSE	no hit	6.8562
DDI2	Q5TDH0|Q5TDH0-3	Protein DDI1 homolog 2 OS=Homo sapiens GN=DDI2 PE=1 SV=1|Isoform 3 of Protein DDI1 homolog 2 OS=Homo sapiens GN=DDI2	11	0.407178	25.0394	WT_GBA - CT	2.56549e-05	0.000966703	FALSE	no hit	7.47785
TMX3	Q96JJ7	Protein disulfide-isomerase TMX3 OS=Homo sapiens GN=TMX3 PE=1 SV=2	14	-0.337298	25.1637	WT_GBA - CT	2.6372e-05	0.000987665	FALSE	no hit	7.20856
CADPS2	A0A087X1P3|C9IYE1|Q86UW7|Q86UW7-2|Q86UW7-3	Calcium-dependent secretion activator 2 OS=Homo sapiens GN=CADPS2 PE=1 SV=1|Calcium-dependent secretion activator 2 OS=Homo sapiens GN=CADPS2 PE=1 SV=1|Calcium-dependent secretion activator 2 OS=Homo sapiens GN=CADPS2 PE=1 SV=2|Isoform 2 of Calcium-dependent secretion activator 2 OS=Homo sapiens GN=CADPS2|Isoform 3 of Calcium-dependent secretion activator 2 OS=Homo sapiens GN=CADPS2	5	0.409	23.8637	WT_GBA - CT	2.65716e-05	0.000987685	FALSE	no hit	6.4836
STK19	A0A140T8X5|A0A140TA37|B7ZLI8|P49842|P49842-2|P49842-3|P49842-4	Serine/threonine-protein kinase 19 OS=Homo sapiens GN=STK19 PE=1 SV=1|Serine/threonine-protein kinase 19 OS=Homo sapiens GN=STK19 PE=1 SV=1|Serine/threonine kinase 19 OS=Homo sapiens GN=STK19 PE=1 SV=1|Serine/threonine-protein kinase 19 OS=Homo sapiens GN=STK19 PE=1 SV=2|Isoform 2 of Serine/threonine-protein kinase 19 OS=Homo sapiens GN=STK19|Isoform 3 of Serine/threonine-protein kinase 19 OS=Hom…	2	0.667351	21.7651	WT_GBA - CT	2.66942e-05	0.000987685	FALSE	candidate	5.97084
CECR5	Q9BXW7|Q9BXW7-2	Cat eye syndrome critical region protein 5 OS=Homo sapiens GN=CECR5 PE=1 SV=1|Isoform 1 of Cat eye syndrome critical region protein 5 OS=Homo sapiens GN=CECR5	9	-0.757145	23.8323	WT_GBA - CT	2.71143e-05	0.000988689	FALSE	candidate	7.15126
BBS7	Q8IWZ6|Q8IWZ6-2	Bardet-Biedl syndrome 7 protein OS=Homo sapiens GN=BBS7 PE=1 SV=2|Isoform 2 of Bardet-Biedl syndrome 7 protein OS=Homo sapiens GN=BBS7	2	0.598147	22.9451	WT_GBA - CT	2.71545e-05	0.000988689	FALSE	candidate	6.2287
SDHAF3	Q9NRP4	Succinate dehydrogenase assembly factor 3, mitochondrial OS=Homo sapiens GN=SDHAF3 PE=1 SV=1	3	0.555916	24.0124	WT_GBA - CT	2.7313e-05	0.000988689	FALSE	no hit	6.48858
ARHGDIA	P52565	Rho GDP-dissociation inhibitor 1 OS=Homo sapiens GN=ARHGDIA PE=1 SV=3	13	-0.409647	27.0637	WT_GBA - CT	2.73652e-05	0.000988689	FALSE	no hit	8.0304
ARHGEF6	Q15052|Q15052-2	Rho guanine nucleotide exchange factor 6 OS=Homo sapiens GN=ARHGEF6 PE=1 SV=2|Isoform 2 of Rho guanine nucleotide exchange factor 6 OS=Homo sapiens GN=ARHGEF6	3	-0.466798	23.1019	WT_GBA - CT	2.75627e-05	0.000990002	FALSE	no hit	6.31765
SEC24D	O94855|O94855-2	Protein transport protein Sec24D OS=Homo sapiens GN=SEC24D PE=1 SV=2|Isoform 2 of Protein transport protein Sec24D OS=Homo sapiens GN=SEC24D	8	0.473516	24.4388	WT_GBA - CT	2.81924e-05	0.0010035	FALSE	no hit	6.69008
AKR7A2	H3BLU7|O43488	Aflatoxin B1 aldehyde reductase member 2 (Fragment) OS=Homo sapiens GN=AKR7A2 PE=1 SV=1|Aflatoxin B1 aldehyde reductase member 2 OS=Homo sapiens GN=AKR7A2 PE=1 SV=3	8	-0.416148	25.5381	WT_GBA - CT	2.82652e-05	0.0010035	FALSE	no hit	7.57778
ENO1	P06733	Alpha-enolase OS=Homo sapiens GN=ENO1 PE=1 SV=2	35	0.447438	29.555	WT_GBA - CT	2.85766e-05	0.00100872	FALSE	no hit	9.13932
BCAP29	B7Z2L0|C9JTE9|H0Y7N8|H7C5E2|Q9UHQ4|Q9UHQ4-2	B-cell receptor-associated protein 29 OS=Homo sapiens GN=BCAP29 PE=1 SV=1|B-cell receptor-associated protein 29 (Fragment) OS=Homo sapiens GN=BCAP29 PE=1 SV=1|B-cell receptor-associated protein 29 (Fragment) OS=Homo sapiens GN=BCAP29 PE=1 SV=1|B-cell receptor-associated protein 29 (Fragment) OS=Homo sapiens GN=BCAP29 PE=1 SV=1|B-cell receptor-associated protein 29 OS=Homo sapiens GN=BCAP29 PE=1 S…	7	0.457466	25.6387	WT_GBA - CT	2.88823e-05	0.00101369	FALSE	no hit	6.95199
FKBP11	F8VU90|Q9NYL4|Q9NYL4-2	Peptidyl-prolyl cis-trans isomerase OS=Homo sapiens GN=FKBP11 PE=1 SV=1|Peptidyl-prolyl cis-trans isomerase FKBP11 OS=Homo sapiens GN=FKBP11 PE=1 SV=1|Isoform 2 of Peptidyl-prolyl cis-trans isomerase FKBP11 OS=Homo sapiens GN=FKBP11	4	0.499928	23.2685	WT_GBA - CT	2.912e-05	0.00101622	FALSE	no hit	7.19395
ING1	A0A0C4DFW2|Q9UK53|Q9UK53-2|Q9UK53-4|Q9UK53-5	Inhibitor of growth protein OS=Homo sapiens GN=ING1 PE=1 SV=1|Inhibitor of growth protein 1 OS=Homo sapiens GN=ING1 PE=1 SV=2|Isoform 2 of Inhibitor of growth protein 1 OS=Homo sapiens GN=ING1|Isoform 4 of Inhibitor of growth protein 1 OS=Homo sapiens GN=ING1|Isoform 5 of Inhibitor of growth protein 1 OS=Homo sapiens GN=ING1	2	-0.716317	22.9761	WT_GBA - CT	2.93025e-05	0.00101681	FALSE	candidate	6.46205
PGAM1	P18669	Phosphoglycerate mutase 1 OS=Homo sapiens GN=PGAM1 PE=1 SV=2	18	-0.374403	27.411	WT_GBA - CT	3.03018e-05	0.00103543	FALSE	no hit	8.09485
GNAO1	P09471-2	Isoform Alpha-2 of Guanine nucleotide-binding protein G(o) subunit alpha OS=Homo sapiens GN=GNAO1	4	-0.516228	23.6047	WT_GBA - CT	3.03038e-05	0.00103543	FALSE	no hit	6.53464
EP300	Q09472	Histone acetyltransferase p300 OS=Homo sapiens GN=EP300 PE=1 SV=2	9	0.38261	24.5959	WT_GBA - CT	3.03448e-05	0.00103543	FALSE	no hit	6.6931
FDFT1	P37268	Squalene synthase OS=Homo sapiens GN=FDFT1 PE=1 SV=1	12	0.455716	25.7206	WT_GBA - CT	3.05552e-05	0.00103681	FALSE	no hit	7.53881
KCTD15	Q96SI1	BTB/POZ domain-containing protein KCTD15 OS=Homo sapiens GN=KCTD15 PE=1 SV=1	10	0.396847	25.2537	WT_GBA - CT	3.07629e-05	0.00103681	FALSE	no hit	7.19637
EPHA2	P29317	Ephrin type-A receptor 2 OS=Homo sapiens GN=EPHA2 PE=1 SV=2	13	0.371377	25.5077	WT_GBA - CT	3.11658e-05	0.00103681	FALSE	no hit	6.83931
LARP1B	Q659C4	La-related protein 1B OS=Homo sapiens GN=LARP1B PE=1 SV=2	2	0.952765	20.4798	WT_GBA - CT	3.11679e-05	0.00103681	FALSE	candidate	6.05176
CCDC134	Q9H6E4	Coiled-coil domain-containing protein 134 OS=Homo sapiens GN=CCDC134 PE=1 SV=1	7	0.321016	24.709	WT_GBA - CT	3.12476e-05	0.00103681	FALSE	no hit	6.92013
NSDHL	Q15738	Sterol-4-alpha-carboxylate 3-dehydrogenase, decarboxylating OS=Homo sapiens GN=NSDHL PE=1 SV=2	14	0.381045	26.4399	WT_GBA - CT	3.1554e-05	0.00103681	FALSE	no hit	7.63761
ZSCAN21	G3V1M0|Q9Y5A6	Putative uncharacterized protein DKFZp686H10254 OS=Homo sapiens GN=ZSCAN21 PE=1 SV=2|Zinc finger and SCAN domain-containing protein 21 OS=Homo sapiens GN=ZSCAN21 PE=1 SV=2	3	0.502771	23.1433	WT_GBA - CT	3.15668e-05	0.00103681	FALSE	no hit	6.05004
RB1CC1	Q8TDY2|Q8TDY2-2	RB1-inducible coiled-coil protein 1 OS=Homo sapiens GN=RB1CC1 PE=1 SV=3|Isoform 2 of RB1-inducible coiled-coil protein 1 OS=Homo sapiens GN=RB1CC1	18	0.374014	25.7716	WT_GBA - CT	3.18756e-05	0.00104138	FALSE	no hit	6.54377
RNF13	C9J8T4|C9JYN7|O43567	E3 ubiquitin-protein ligase RNF13 (Fragment) OS=Homo sapiens GN=RNF13 PE=1 SV=1|E3 ubiquitin-protein ligase RNF13 (Fragment) OS=Homo sapiens GN=RNF13 PE=1 SV=1|E3 ubiquitin-protein ligase RNF13 OS=Homo sapiens GN=RNF13 PE=1 SV=1	2	0.479642	22.6666	WT_GBA - CT	3.3084e-05	0.00107514	FALSE	no hit	5.96704
ERAP1	Q9NZ08|Q9NZ08-2	Endoplasmic reticulum aminopeptidase 1 OS=Homo sapiens GN=ERAP1 PE=1 SV=3|Isoform 2 of Endoplasmic reticulum aminopeptidase 1 OS=Homo sapiens GN=ERAP1	4	0.493948	23.7852	WT_GBA - CT	3.37236e-05	0.00108952	FALSE	no hit	6.2607
POLR3H	Q9Y535|Q9Y535-2	DNA-directed RNA polymerase III subunit RPC8 OS=Homo sapiens GN=POLR3H PE=1 SV=1|Isoform 2 of DNA-directed RNA polymerase III subunit RPC8 OS=Homo sapiens GN=POLR3H	4	0.36301	23.8736	WT_GBA - CT	3.38812e-05	0.00108952	FALSE	no hit	6.2992
GMPPB	Q9Y5P6|Q9Y5P6-2	Mannose-1-phosphate guanyltransferase beta OS=Homo sapiens GN=GMPPB PE=1 SV=2|Isoform 2 of Mannose-1-phosphate guanyltransferase beta OS=Homo sapiens GN=GMPPB	6	0.418017	25.0123	WT_GBA - CT	3.55647e-05	0.0011377	FALSE	no hit	7.16907
DSP	P15924	Desmoplakin OS=Homo sapiens GN=DSP PE=1 SV=3	121	0.374388	29.118	WT_GBA - CT	3.61847e-05	0.00115154	FALSE	no hit	7.67339
HDLBP	A0A024R4E5	High density lipoprotein binding protein (Vigilin), isoform CRA_a OS=Homo sapiens GN=HDLBP PE=1 SV=1	60	0.365182	28.5944	WT_GBA - CT	3.66311e-05	0.00115878	FALSE	no hit	7.84743
CDC42EP4	Q9H3Q1	Cdc42 effector protein 4 OS=Homo sapiens GN=CDC42EP4 PE=1 SV=1	6	-0.527839	23.0325	WT_GBA - CT	3.67895e-05	0.00115878	FALSE	no hit	6.36433
IPO5	O00410|O00410-3	Importin-5 OS=Homo sapiens GN=IPO5 PE=1 SV=4|Isoform 3 of Importin-5 OS=Homo sapiens GN=IPO5	27	-0.412283	26.8074	WT_GBA - CT	3.85984e-05	0.00120955	FALSE	no hit	7.97804
HMGB2	P26583	High mobility group protein B2 OS=Homo sapiens GN=HMGB2 PE=1 SV=2	11	-0.507205	26.7802	WT_GBA - CT	3.88187e-05	0.00121028	FALSE	no hit	8.1122
PCID2	Q5JVF3|Q5JVF3-2|Q5JVF3-3|Q5JVF3-4	PCI domain-containing protein 2 OS=Homo sapiens GN=PCID2 PE=1 SV=2|Isoform 2 of PCI domain-containing protein 2 OS=Homo sapiens GN=PCID2|Isoform 3 of PCI domain-containing protein 2 OS=Homo sapiens GN=PCID2|Isoform 4 of PCI domain-containing protein 2 OS=Homo sapiens GN=PCID2	10	-0.328242	25.6415	WT_GBA - CT	4.00227e-05	0.00123365	FALSE	no hit	6.96883
EXD2	Q9NVH0|Q9NVH0-2	Exonuclease 3'-5' domain-containing protein 2 OS=Homo sapiens GN=EXD2 PE=1 SV=2|Isoform 2 of Exonuclease 3'-5' domain-containing protein 2 OS=Homo sapiens GN=EXD2	5	0.452412	23.2317	WT_GBA - CT	4.01454e-05	0.00123365	FALSE	no hit	6.43045
GSTM2	E9PHN7|P28161	Glutathione S-transferase Mu 2 OS=Homo sapiens GN=GSTM2 PE=1 SV=2|Glutathione S-transferase Mu 2 OS=Homo sapiens GN=GSTM2 PE=1 SV=2	4	1.14941	23.6525	WT_GBA - CT	4.0171e-05	0.00123365	TRUE	hit	6.18228
MKI67	P46013|P46013-2	Antigen KI-67 OS=Homo sapiens GN=MKI67 PE=1 SV=2|Isoform Short of Antigen KI-67 OS=Homo sapiens GN=MKI67	94	-0.422257	28.6526	WT_GBA - CT	4.07187e-05	0.00124425	FALSE	no hit	7.24127
LAMB1	G3XAI2|P07942	Laminin subunit beta-1 OS=Homo sapiens GN=LAMB1 PE=1 SV=1|Laminin subunit beta-1 OS=Homo sapiens GN=LAMB1 PE=1 SV=2	41	0.317814	27.3823	WT_GBA - CT	4.15597e-05	0.00126366	FALSE	no hit	7.36679
PRRC1	Q96M27	Protein PRRC1 OS=Homo sapiens GN=PRRC1 PE=1 SV=1	5	0.38851	24.2511	WT_GBA - CT	4.35909e-05	0.00131889	FALSE	no hit	7.0701
C1ORF174	Q8IYL3	UPF0688 protein C1orf174 OS=Homo sapiens GN=C1orf174 PE=1 SV=2	3	0.476028	23.9558	WT_GBA - CT	4.43861e-05	0.00133229	FALSE	no hit	6.81682
EEF1A2	Q05639	Elongation factor 1-alpha 2 OS=Homo sapiens GN=EEF1A2 PE=1 SV=1	8	-0.589043	24.815	WT_GBA - CT	4.44675e-05	0.00133229	FALSE	candidate	7.32764
POLDIP3	Q9BY77|Q9BY77-2	Polymerase delta-interacting protein 3 OS=Homo sapiens GN=POLDIP3 PE=1 SV=2|Isoform 2 of Polymerase delta-interacting protein 3 OS=Homo sapiens GN=POLDIP3	22	0.42389	26.5789	WT_GBA - CT	4.62167e-05	0.00137616	FALSE	no hit	7.53558
DFFA	K7ERT1|O00273|O00273-2	DNA fragmentation factor subunit alpha OS=Homo sapiens GN=DFFA PE=1 SV=1|DNA fragmentation factor subunit alpha OS=Homo sapiens GN=DFFA PE=1 SV=1|Isoform DFF35 of DNA fragmentation factor subunit alpha OS=Homo sapiens GN=DFFA	13	0.430672	26.0016	WT_GBA - CT	4.638e-05	0.00137616	FALSE	no hit	7.66259
TXLNA	P40222	Alpha-taxilin OS=Homo sapiens GN=TXLNA PE=1 SV=3	33	-0.406217	27.5242	WT_GBA - CT	4.71377e-05	0.00138752	FALSE	no hit	7.62286
GYG1	P46976|P46976-2	Glycogenin-1 OS=Homo sapiens GN=GYG1 PE=1 SV=4|Isoform GN-1 of Glycogenin-1 OS=Homo sapiens GN=GYG1	7	-0.737383	24.3356	WT_GBA - CT	4.72144e-05	0.00138752	FALSE	candidate	7.31708
CRABP2	P29373	Cellular retinoic acid-binding protein 2 OS=Homo sapiens GN=CRABP2 PE=1 SV=2	7	-1.69365	24.7476	WT_GBA - CT	4.81836e-05	0.00140926	TRUE	hit	6.85241
CPTP	Q5TA50	Ceramide-1-phosphate transfer protein OS=Homo sapiens GN=CPTP PE=1 SV=1	3	0.407791	23.4327	WT_GBA - CT	5.00937e-05	0.00145818	FALSE	no hit	6.25858
CPSF3L	Q5TA45|Q5TA45-3|Q5TA45-4|Q5TA45-5	Integrator complex subunit 11 OS=Homo sapiens GN=CPSF3L PE=1 SV=2|Isoform 3 of Integrator complex subunit 11 OS=Homo sapiens GN=CPSF3L|Isoform 4 of Integrator complex subunit 11 OS=Homo sapiens GN=CPSF3L|Isoform 5 of Integrator complex subunit 11 OS=Homo sapiens GN=CPSF3L	5	0.290962	23.2505	WT_GBA - CT	5.05307e-05	0.00145822	FALSE	no hit	6.34764
TOR1AIP2	Q8NFQ8	Torsin-1A-interacting protein 2 OS=Homo sapiens GN=TOR1AIP2 PE=1 SV=1	8	-0.34808	25.0385	WT_GBA - CT	5.057e-05	0.00145822	FALSE	no hit	7.11566
CLU	P10909|P10909-2|P10909-4|P10909-5	Clusterin OS=Homo sapiens GN=CLU PE=1 SV=1|Isoform 2 of Clusterin OS=Homo sapiens GN=CLU|Isoform 4 of Clusterin OS=Homo sapiens GN=CLU|Isoform 5 of Clusterin OS=Homo sapiens GN=CLU	3	-0.622669	22.2575	WT_GBA - CT	5.09826e-05	0.00146264	FALSE	candidate	5.94097
NUB1	H3BM14|H3BM74|Q9Y5A7|Q9Y5A7-2	NEDD8 ultimate buster 1 OS=Homo sapiens GN=NUB1 PE=1 SV=1|NEDD8 ultimate buster 1 OS=Homo sapiens GN=NUB1 PE=1 SV=1|NEDD8 ultimate buster 1 OS=Homo sapiens GN=NUB1 PE=1 SV=2|Isoform 2 of NEDD8 ultimate buster 1 OS=Homo sapiens GN=NUB1	13	0.346553	25.5045	WT_GBA - CT	5.11994e-05	0.00146264	FALSE	no hit	7.09179
PNPLA2	Q96AD5	Patatin-like phospholipase domain-containing protein 2 OS=Homo sapiens GN=PNPLA2 PE=1 SV=1	4	-0.539196	22.2331	WT_GBA - CT	5.20598e-05	0.00148033	FALSE	no hit	5.74727
SHTN1	A0MZ66|A0MZ66-3	Shootin-1 OS=Homo sapiens GN=SHTN1 PE=1 SV=4|Isoform 3 of Shootin-1 OS=Homo sapiens GN=SHTN1	25	-0.415392	26.7807	WT_GBA - CT	5.2507e-05	0.00148617	FALSE	no hit	7.02565
SNU13	B1AHD1|P55769	NHP2-like protein 1 OS=Homo sapiens GN=SNU13 PE=1 SV=1|NHP2-like protein 1 OS=Homo sapiens GN=SNU13 PE=1 SV=3	5	0.3721	24.5964	WT_GBA - CT	5.30834e-05	0.00149559	FALSE	no hit	7.18038
NDRG2	G3V4S9|Q9UN36|Q9UN36-2|Q9UN36-3|Q9UN36-4	Protein NDRG2 (Fragment) OS=Homo sapiens GN=NDRG2 PE=1 SV=7|Protein NDRG2 OS=Homo sapiens GN=NDRG2 PE=1 SV=2|Isoform 2 of Protein NDRG2 OS=Homo sapiens GN=NDRG2|Isoform 3 of Protein NDRG2 OS=Homo sapiens GN=NDRG2|Isoform 4 of Protein NDRG2 OS=Homo sapiens GN=NDRG2	3	0.550171	23.4987	WT_GBA - CT	5.36879e-05	0.00150023	FALSE	no hit	6.32453
ATP6V1B2	P21281	V-type proton ATPase subunit B, brain isoform OS=Homo sapiens GN=ATP6V1B2 PE=1 SV=3	17	-0.309645	26.5182	WT_GBA - CT	5.37367e-05	0.00150023	FALSE	no hit	7.4357
ATP2A2	P16615	Sarcoplasmic/endoplasmic reticulum calcium ATPase 2 OS=Homo sapiens GN=ATP2A2 PE=1 SV=1	30	0.395569	27.7668	WT_GBA - CT	5.4383e-05	0.0015114	FALSE	no hit	8.02069
EIF4A2	Q14240|Q14240-2	Eukaryotic initiation factor 4A-II OS=Homo sapiens GN=EIF4A2 PE=1 SV=2|Isoform 2 of Eukaryotic initiation factor 4A-II OS=Homo sapiens GN=EIF4A2	4	-0.593535	23.8311	WT_GBA - CT	5.47737e-05	0.00151541	FALSE	candidate	6.97226
SULT1A1	P50225	Sulfotransferase 1A1 OS=Homo sapiens GN=SULT1A1 PE=1 SV=3	15	-0.524648	26.2871	WT_GBA - CT	5.66426e-05	0.00155235	FALSE	no hit	7.6394
MPST	P25325|P25325-2	3-mercaptopyruvate sulfurtransferase OS=Homo sapiens GN=MPST PE=1 SV=3|Isoform 2 of 3-mercaptopyruvate sulfurtransferase OS=Homo sapiens GN=MPST	11	0.332116	25.9508	WT_GBA - CT	5.67232e-05	0.00155235	FALSE	no hit	7.48545
SUN1	E9PHI4|O94901|O94901-5|O94901-6|O94901-8|O94901-9	SUN domain-containing protein 1 OS=Homo sapiens GN=SUN1 PE=1 SV=1|SUN domain-containing protein 1 OS=Homo sapiens GN=SUN1 PE=1 SV=3|Isoform 5 of SUN domain-containing protein 1 OS=Homo sapiens GN=SUN1|Isoform 6 of SUN domain-containing protein 1 OS=Homo sapiens GN=SUN1|Isoform 8 of SUN domain-containing protein 1 OS=Homo sapiens GN=SUN1|Isoform 9 of SUN domain-containing protein 1 OS=Homo sapiens…	2	-0.397101	22.4741	WT_GBA - CT	5.68674e-05	0.00155235	FALSE	no hit	6.20273
LRRC20	Q8TCA0|X6RK58	Leucine-rich repeat-containing protein 20 OS=Homo sapiens GN=LRRC20 PE=1 SV=1|Leucine-rich repeat-containing protein 20 (Fragment) OS=Homo sapiens GN=LRRC20 PE=1 SV=6	2	-0.500915	23.145	WT_GBA - CT	5.8166e-05	0.00158078	FALSE	no hit	7.07801
DNAJC21	Q5F1R6|Q5F1R6-2|Q5F1R6-3	DnaJ homolog subfamily C member 21 OS=Homo sapiens GN=DNAJC21 PE=1 SV=2|Isoform 2 of DnaJ homolog subfamily C member 21 OS=Homo sapiens GN=DNAJC21|Isoform 3 of DnaJ homolog subfamily C member 21 OS=Homo sapiens GN=DNAJC21	16	0.445116	25.7042	WT_GBA - CT	5.85329e-05	0.00158288	FALSE	no hit	7.09895
ACSL3	O95573	Long-chain-fatty-acid--CoA ligase 3 OS=Homo sapiens GN=ACSL3 PE=1 SV=3	20	0.342403	26.0792	WT_GBA - CT	5.87589e-05	0.00158288	FALSE	no hit	7.53029
SEC11C	B4DI03|K7EJQ7|Q9BY50	Signal peptidase complex catalytic subunit SEC11 OS=Homo sapiens GN=SEC11C PE=1 SV=1|Signal peptidase complex catalytic subunit SEC11 OS=Homo sapiens GN=SEC11C PE=1 SV=1|Signal peptidase complex catalytic subunit SEC11C OS=Homo sapiens GN=SEC11C PE=1 SV=3	4	1.05106	23.6111	WT_GBA - CT	6.05135e-05	0.00161678	TRUE	hit	6.65955
GSTZ1	A0A0C4DFM0|G3V4T6|G3V5T0	Glutathione transferase zeta 1 (Maleylacetoacetate isomerase), isoform CRA_c OS=Homo sapiens GN=GSTZ1 PE=1 SV=1|Maleylacetoacetate isomerase OS=Homo sapiens GN=GSTZ1 PE=1 SV=1|Maleylacetoacetate isomerase OS=Homo sapiens GN=GSTZ1 PE=1 SV=1	6	0.50168	24.9383	WT_GBA - CT	6.06844e-05	0.00161678	FALSE	no hit	7.24865
SERGEF	Q9UGK8	Secretion-regulating guanine nucleotide exchange factor OS=Homo sapiens GN=SERGEF PE=1 SV=2	2	0.447886	21.4414	WT_GBA - CT	6.08069e-05	0.00161678	FALSE	no hit	5.90449
GDI1	P31150	Rab GDP dissociation inhibitor alpha OS=Homo sapiens GN=GDI1 PE=1 SV=2	11	-0.358832	25.9404	WT_GBA - CT	6.25671e-05	0.00164608	FALSE	no hit	7.73637
CDC34	P49427	Ubiquitin-conjugating enzyme E2 R1 OS=Homo sapiens GN=CDC34 PE=1 SV=2	4	-0.460817	23.9942	WT_GBA - CT	6.26602e-05	0.00164608	FALSE	no hit	7.13123
CASP7	A0A0A0MRL7|Q5SVL2	Caspase-7 OS=Homo sapiens GN=CASP7 PE=1 SV=1|Caspase-7 (Fragment) OS=Homo sapiens GN=CASP7 PE=1 SV=1	4	-0.404164	23.3067	WT_GBA - CT	6.27129e-05	0.00164608	FALSE	no hit	6.3881
IBTK	Q9P2D0	Inhibitor of Bruton tyrosine kinase OS=Homo sapiens GN=IBTK PE=1 SV=3	8	0.438263	24.3178	WT_GBA - CT	6.32389e-05	0.00164846	FALSE	no hit	6.81862
CPOX	P36551	Oxygen-dependent coproporphyrinogen-III oxidase, mitochondrial OS=Homo sapiens GN=CPOX PE=1 SV=3	12	-0.349104	24.444	WT_GBA - CT	6.38563e-05	0.00164846	FALSE	no hit	7.39449
MAP3K5	Q99683	Mitogen-activated protein kinase kinase kinase 5 OS=Homo sapiens GN=MAP3K5 PE=1 SV=1	2	-0.722634	21.2765	WT_GBA - CT	6.39874e-05	0.00164846	FALSE	candidate	5.87678
AKAP12	Q02952	A-kinase anchor protein 12 OS=Homo sapiens GN=AKAP12 PE=1 SV=4	61	-0.356173	28.308	WT_GBA - CT	6.40369e-05	0.00164846	FALSE	no hit	7.42128
LMF2	Q9BU23|Q9BU23-2|Q9BU23-3	Lipase maturation factor 2 OS=Homo sapiens GN=LMF2 PE=1 SV=2|Isoform 2 of Lipase maturation factor 2 OS=Homo sapiens GN=LMF2|Isoform 3 of Lipase maturation factor 2 OS=Homo sapiens GN=LMF2	4	0.365782	24.5953	WT_GBA - CT	6.41454e-05	0.00164846	FALSE	no hit	7.19627
ZC3H7B	Q9UGR2|Q9UGR2-2	Zinc finger CCCH domain-containing protein 7B OS=Homo sapiens GN=ZC3H7B PE=1 SV=1|Isoform 2 of Zinc finger CCCH domain-containing protein 7B OS=Homo sapiens GN=ZC3H7B	11	0.332581	25.4214	WT_GBA - CT	6.48123e-05	0.00165415	FALSE	no hit	6.87652
GUSB	P08236|P08236-2|P08236-3	Beta-glucuronidase OS=Homo sapiens GN=GUSB PE=1 SV=2|Isoform 2 of Beta-glucuronidase OS=Homo sapiens GN=GUSB|Isoform 3 of Beta-glucuronidase OS=Homo sapiens GN=GUSB	5	-0.408297	24.016	WT_GBA - CT	6.49057e-05	0.00165415	FALSE	no hit	6.79708
MCAT	Q8IVS2	Malonyl-CoA-acyl carrier protein transacylase, mitochondrial OS=Homo sapiens GN=MCAT PE=1 SV=2	3	0.514908	22.2461	WT_GBA - CT	6.52301e-05	0.00165555	FALSE	no hit	6.50177
ATP6V1G1	O75348	V-type proton ATPase subunit G 1 OS=Homo sapiens GN=ATP6V1G1 PE=1 SV=3	4	-0.442506	23.9504	WT_GBA - CT	6.61424e-05	0.0016718	FALSE	no hit	7.17552
NAMPT	A0A0C4DFS8|P43490	Nicotinamide phosphoribosyltransferase OS=Homo sapiens GN=NAMPT PE=1 SV=1	19	0.303434	26.5301	WT_GBA - CT	6.66909e-05	0.00167875	FALSE	no hit	7.76771
ATP6V1D	Q9Y5K8	V-type proton ATPase subunit D OS=Homo sapiens GN=ATP6V1D PE=1 SV=1	5	-0.315626	23.8342	WT_GBA - CT	6.77243e-05	0.00169055	FALSE	no hit	6.79036
NUP210	Q8TEM1	Nuclear pore membrane glycoprotein 210 OS=Homo sapiens GN=NUP210 PE=1 SV=3	30	-0.470717	27.0861	WT_GBA - CT	6.7825e-05	0.00169055	FALSE	no hit	7.36063
HERPUD1	Q15011|Q15011-2|Q15011-3|Q15011-4	Homocysteine-responsive endoplasmic reticulum-resident ubiquitin-like domain member 1 protein OS=Homo sapiens GN=HERPUD1 PE=1 SV=1|Isoform 2 of Homocysteine-responsive endoplasmic reticulum-resident ubiquitin-like domain member 1 protein OS=Homo sapiens GN=HERPUD1|Isoform 3 of Homocysteine-responsive endoplasmic reticulum-resident ubiquitin-like domain member 1 protein OS=Homo sapiens GN=HERPUD1|…	3	0.955089	23.3084	WT_GBA - CT	6.82846e-05	0.00169055	FALSE	candidate	6.44568
CTBP2	P56545	C-terminal-binding protein 2 OS=Homo sapiens GN=CTBP2 PE=1 SV=1	6	0.358925	24.7123	WT_GBA - CT	6.83947e-05	0.00169055	FALSE	no hit	7.52074
PRC1	O43663	Protein regulator of cytokinesis 1 OS=Homo sapiens GN=PRC1 PE=1 SV=2	14	-0.413861	25.9974	WT_GBA - CT	6.8536e-05	0.00169055	FALSE	no hit	7.14081
ZBTB9	Q96C00	Zinc finger and BTB domain-containing protein 9 OS=Homo sapiens GN=ZBTB9 PE=1 SV=1	2	0.325737	22.2124	WT_GBA - CT	6.96218e-05	0.00169755	FALSE	no hit	6.09196
EML3	B7WPE2|Q32P44	Echinoderm microtubule associated protein like 3, isoform CRA_e OS=Homo sapiens GN=EML3 PE=1 SV=1|Echinoderm microtubule-associated protein-like 3 OS=Homo sapiens GN=EML3 PE=1 SV=1	2	-0.622551	22.2245	WT_GBA - CT	6.96226e-05	0.00169755	FALSE	candidate	6.17841
BRI3BP	Q8WY22	BRI3-binding protein OS=Homo sapiens GN=BRI3BP PE=1 SV=1	3	-0.491561	23.3477	WT_GBA - CT	6.98139e-05	0.00169755	FALSE	no hit	6.77512
RCC2	Q9P258	Protein RCC2 OS=Homo sapiens GN=RCC2 PE=1 SV=2	24	0.366576	27.02	WT_GBA - CT	6.99253e-05	0.00169755	FALSE	no hit	8.10827
PDXP	Q96GD0	Pyridoxal phosphate phosphatase OS=Homo sapiens GN=PDXP PE=1 SV=2	11	0.489946	25.1854	WT_GBA - CT	7.06359e-05	0.00170805	FALSE	no hit	7.48355
MTG2	Q9H4K7	Mitochondrial ribosome-associated GTPase 2 OS=Homo sapiens GN=MTG2 PE=1 SV=1	2	0.406706	21.527	WT_GBA - CT	7.12656e-05	0.00171652	FALSE	no hit	5.9667
CCP110	O43303|O43303-2	Centriolar coiled-coil protein of 110 kDa OS=Homo sapiens GN=CCP110 PE=1 SV=3|Isoform 2 of Centriolar coiled-coil protein of 110 kDa OS=Homo sapiens GN=CCP110	7	-0.364957	23.9478	WT_GBA - CT	7.2198e-05	0.00173219	FALSE	no hit	6.21228
TPP2	Q5VZU9	Tripeptidyl-peptidase 2 OS=Homo sapiens GN=TPP2 PE=1 SV=1	39	-0.311818	27.3137	WT_GBA - CT	7.34982e-05	0.00175652	FALSE	no hit	7.55268
RBFOX2	O43251-6|O43251-8	Isoform 6 of RNA binding protein fox-1 homolog 2 OS=Homo sapiens GN=RBFOX2|Isoform 8 of RNA binding protein fox-1 homolog 2 OS=Homo sapiens GN=RBFOX2	2	0.48493	21.453	WT_GBA - CT	7.4129e-05	0.00176473	FALSE	no hit	6.08415
TKFC	A0A087WUL0|Q3LXA3	Triokinase/FMN cyclase OS=Homo sapiens GN=TKFC PE=1 SV=1|Triokinase/FMN cyclase OS=Homo sapiens GN=TKFC PE=1 SV=2	14	-0.325565	25.6404	WT_GBA - CT	7.46805e-05	0.001771	FALSE	no hit	7.04081
CLPTM1L	G5E9Z2|Q96KA5|Q96KA5-2	Cisplatin resistance related protein CRR9p, isoform CRA_c OS=Homo sapiens GN=CLPTM1L PE=1 SV=1|Cleft lip and palate transmembrane protein 1-like protein OS=Homo sapiens GN=CLPTM1L PE=1 SV=1|Isoform 2 of Cleft lip and palate transmembrane protein 1-like protein OS=Homo sapiens GN=CLPTM1L	5	0.377697	23.7193	WT_GBA - CT	7.53268e-05	0.00177945	FALSE	no hit	6.97207
CBX6	B0QXZ6|O95503	Chromobox protein homolog 6 OS=Homo sapiens GN=CBX6 PE=1 SV=1|Chromobox protein homolog 6 OS=Homo sapiens GN=CBX6 PE=1 SV=1	3	0.659352	22.7028	WT_GBA - CT	7.5822e-05	0.00178429	FALSE	candidate	6.20793
TBC1D22A	A0A0A0MRY0|Q8WUA7|Q8WUA7-4	TBC1 domain family member 22A OS=Homo sapiens GN=TBC1D22A PE=1 SV=1|TBC1 domain family member 22A OS=Homo sapiens GN=TBC1D22A PE=1 SV=2|Isoform 4 of TBC1 domain family member 22A OS=Homo sapiens GN=TBC1D22A	6	0.33758	23.9056	WT_GBA - CT	7.61341e-05	0.00178479	FALSE	no hit	6.7883
RACGAP1	Q9H0H5	Rac GTPase-activating protein 1 OS=Homo sapiens GN=RACGAP1 PE=1 SV=1	10	-0.368952	25.3526	WT_GBA - CT	7.69323e-05	0.00179193	FALSE	no hit	7.00007
NOL12|V9GYY5	Q9UGY1|V9GYY5	Nucleolar protein 12 OS=Homo sapiens GN=NOL12 PE=1 SV=1|Uncharacterized protein (Fragment) OS=Homo sapiens PE=4 SV=1	4	0.416153	23.3073	WT_GBA - CT	7.75211e-05	0.00179193	FALSE	no hit	6.85186
CC2D1A	Q6P1N0|Q6P1N0-2	Coiled-coil and C2 domain-containing protein 1A OS=Homo sapiens GN=CC2D1A PE=1 SV=1|Isoform 2 of Coiled-coil and C2 domain-containing protein 1A OS=Homo sapiens GN=CC2D1A	24	-0.374045	26.1483	WT_GBA - CT	7.75491e-05	0.00179193	FALSE	no hit	7.09308
PAK1IP1	Q9NWT1	p21-activated protein kinase-interacting protein 1 OS=Homo sapiens GN=PAK1IP1 PE=1 SV=2	5	0.375359	24.764	WT_GBA - CT	7.76054e-05	0.00179193	FALSE	no hit	7.00636
FAM83H	J3KPS2|Q6ZRV2	Protein FAM83H (Fragment) OS=Homo sapiens GN=FAM83H PE=1 SV=1|Protein FAM83H OS=Homo sapiens GN=FAM83H PE=1 SV=3	7	-0.4362	23.3842	WT_GBA - CT	8.10934e-05	0.00185959	FALSE	no hit	6.16709
SRM	P19623	Spermidine synthase OS=Homo sapiens GN=SRM PE=1 SV=1	12	0.496199	25.6507	WT_GBA - CT	8.13255e-05	0.00185959	FALSE	no hit	7.74217
HSPA2	P54652	Heat shock-related 70 kDa protein 2 OS=Homo sapiens GN=HSPA2 PE=1 SV=1	2	-0.561995	22.2584	WT_GBA - CT	8.14441e-05	0.00185959	FALSE	no hit	6.15106
VAV2	P52735|P52735-2|P52735-3	Guanine nucleotide exchange factor VAV2 OS=Homo sapiens GN=VAV2 PE=1 SV=2|Isoform 2 of Guanine nucleotide exchange factor VAV2 OS=Homo sapiens GN=VAV2|Isoform 3 of Guanine nucleotide exchange factor VAV2 OS=Homo sapiens GN=VAV2	6	-0.36096	24.5474	WT_GBA - CT	8.37802e-05	0.00189967	FALSE	no hit	6.6519
SLC5A6	Q9Y289	Sodium-dependent multivitamin transporter OS=Homo sapiens GN=SLC5A6 PE=2 SV=2	2	0.314094	22.4626	WT_GBA - CT	8.41096e-05	0.00189967	FALSE	no hit	6.38195
SYPL1	C9JYN0|Q16563|Q16563-2	Synaptophysin-like protein 1 OS=Homo sapiens GN=SYPL1 PE=1 SV=1|Synaptophysin-like protein 1 OS=Homo sapiens GN=SYPL1 PE=1 SV=1|Isoform 2 of Synaptophysin-like protein 1 OS=Homo sapiens GN=SYPL1	2	0.386264	23.3962	WT_GBA - CT	8.41273e-05	0.00189967	FALSE	no hit	7.02031
JPH1	Q9HDC5	Junctophilin-1 OS=Homo sapiens GN=JPH1 PE=1 SV=2	8	-0.506792	24.9082	WT_GBA - CT	8.44936e-05	0.00190095	FALSE	no hit	6.8611
VIMP	Q9BQE4	Selenoprotein S OS=Homo sapiens GN=VIMP PE=1 SV=3	5	0.518399	24.2053	WT_GBA - CT	8.56265e-05	0.00191941	FALSE	no hit	7.00493
ATP6V1A	P38606	V-type proton ATPase catalytic subunit A OS=Homo sapiens GN=ATP6V1A PE=1 SV=2	18	-0.362011	26.3189	WT_GBA - CT	8.73087e-05	0.00194472	FALSE	no hit	7.62556
CD47	Q08722|Q08722-2|Q08722-3|Q08722-4	Leukocyte surface antigen CD47 OS=Homo sapiens GN=CD47 PE=1 SV=1|Isoform OA3-293 of Leukocyte surface antigen CD47 OS=Homo sapiens GN=CD47|Isoform OA3-305 of Leukocyte surface antigen CD47 OS=Homo sapiens GN=CD47|Isoform OA3-312 of Leukocyte surface antigen CD47 OS=Homo sapiens GN=CD47	3	-0.323989	24.5914	WT_GBA - CT	8.7389e-05	0.00194472	FALSE	no hit	7.16733
PARVB	Q9HBI1	Beta-parvin OS=Homo sapiens GN=PARVB PE=1 SV=1	3	-0.321388	22.7191	WT_GBA - CT	9.04644e-05	0.00199874	FALSE	no hit	5.94522
NUDT15	Q9NV35	Probable 8-oxo-dGTP diphosphatase NUDT15 OS=Homo sapiens GN=NUDT15 PE=1 SV=1	4	0.481402	22.765	WT_GBA - CT	9.07539e-05	0.00199874	FALSE	no hit	6.67616
RANGAP1	P46060	Ran GTPase-activating protein 1 OS=Homo sapiens GN=RANGAP1 PE=1 SV=1	25	0.474092	27.4399	WT_GBA - CT	9.07926e-05	0.00199874	FALSE	no hit	8.00753
MCAM	P43121	Cell surface glycoprotein MUC18 OS=Homo sapiens GN=MCAM PE=1 SV=2	9	-0.471488	24.9277	WT_GBA - CT	9.2861e-05	0.00203697	FALSE	no hit	6.74504
RABL2A|RABL2B	Q9UBK7|Q9UBK7-2|Q9UBK7-3|Q9UNT1|Q9UNT1-2|Q9UNT1-3	Rab-like protein 2A OS=Homo sapiens GN=RABL2A PE=1 SV=1|Isoform 2 of Rab-like protein 2A OS=Homo sapiens GN=RABL2A|Isoform 3 of Rab-like protein 2A OS=Homo sapiens GN=RABL2A|Rab-like protein 2B OS=Homo sapiens GN=RABL2B PE=2 SV=1|Isoform 2 of Rab-like protein 2B OS=Homo sapiens GN=RABL2B|Isoform 3 of Rab-like protein 2B OS=Homo sapiens GN=RABL2B	4	0.527915	23.9431	WT_GBA - CT	9.50731e-05	0.00207234	FALSE	no hit	6.36611
NCAPH2	A0A0A6YYG7|Q6IBW4|Q6IBW4-4	Condensin-2 complex subunit H2 OS=Homo sapiens GN=NCAPH2 PE=1 SV=1|Condensin-2 complex subunit H2 OS=Homo sapiens GN=NCAPH2 PE=1 SV=1|Isoform 4 of Condensin-2 complex subunit H2 OS=Homo sapiens GN=NCAPH2	8	0.295509	24.9562	WT_GBA - CT	9.51481e-05	0.00207234	FALSE	no hit	7.16453
FOXRED2	Q8IWF2	FAD-dependent oxidoreductase domain-containing protein 2 OS=Homo sapiens GN=FOXRED2 PE=1 SV=1	3	0.461191	22.9979	WT_GBA - CT	9.60533e-05	0.00207751	FALSE	no hit	6.49057
DNAJC10	Q8IXB1	DnaJ homolog subfamily C member 10 OS=Homo sapiens GN=DNAJC10 PE=1 SV=2	9	0.419995	24.7116	WT_GBA - CT	9.60622e-05	0.00207751	FALSE	no hit	7.07063
TPI1	P60174|P60174-1	Triosephosphate isomerase OS=Homo sapiens GN=TPI1 PE=1 SV=3|Isoform 2 of Triosephosphate isomerase OS=Homo sapiens GN=TPI1	18	-0.370721	27.8751	WT_GBA - CT	9.76311e-05	0.00210404	FALSE	no hit	8.94848
MKLN1	Q9UL63	Muskelin OS=Homo sapiens GN=MKLN1 PE=1 SV=2	9	0.365353	24.5194	WT_GBA - CT	9.87658e-05	0.00211066	FALSE	no hit	6.58989
NOVA2	Q9UNW9	RNA-binding protein Nova-2 OS=Homo sapiens GN=NOVA2 PE=1 SV=1	2	-0.613401	22.6203	WT_GBA - CT	9.90392e-05	0.00211066	FALSE	candidate	5.94802
PPP1R12C	Q9BZL4|Q9BZL4-4	Protein phosphatase 1 regulatory subunit 12C OS=Homo sapiens GN=PPP1R12C PE=1 SV=1|Isoform 4 of Protein phosphatase 1 regulatory subunit 12C OS=Homo sapiens GN=PPP1R12C	6	-0.361762	23.9432	WT_GBA - CT	9.92985e-05	0.00211066	FALSE	no hit	6.33187
TMED5	Q9Y3A6	Transmembrane emp24 domain-containing protein 5 OS=Homo sapiens GN=TMED5 PE=1 SV=1	6	0.366953	24.6077	WT_GBA - CT	9.9603e-05	0.00211066	FALSE	no hit	7.2704
TTR	A0A087WT59|A0A087WV45|P02766	Transthyretin OS=Homo sapiens GN=TTR PE=1 SV=1|Transthyretin OS=Homo sapiens GN=TTR PE=1 SV=1|Transthyretin OS=Homo sapiens GN=TTR PE=1 SV=1	2	0.928572	23.3127	WT_GBA - CT	9.96567e-05	0.00211066	FALSE	candidate	8.13199
SLC12A9	Q9BXP2	Solute carrier family 12 member 9 OS=Homo sapiens GN=SLC12A9 PE=1 SV=1	6	0.343653	23.7496	WT_GBA - CT	0.000102971	0.00216651	FALSE	no hit	6.78266
KIAA0930	Q6ICG6|Q6ICG6-2|Q6ICG6-3	Uncharacterized protein KIAA0930 OS=Homo sapiens GN=KIAA0930 PE=1 SV=1|Isoform 2 of Uncharacterized protein KIAA0930 OS=Homo sapiens GN=KIAA0930|Isoform 3 of Uncharacterized protein KIAA0930 OS=Homo sapiens GN=KIAA0930	7	0.326113	24.3016	WT_GBA - CT	0.000102999	0.00216651	FALSE	no hit	6.4752
GSTK1	Q9Y2Q3	Glutathione S-transferase kappa 1 OS=Homo sapiens GN=GSTK1 PE=1 SV=3	6	0.303613	25.0129	WT_GBA - CT	0.000105513	0.00221181	FALSE	no hit	7.1468
ANXA6	E5RK69|P08133	Annexin OS=Homo sapiens GN=ANXA6 PE=1 SV=1|Annexin A6 OS=Homo sapiens GN=ANXA6 PE=1 SV=3	44	0.285944	28.0325	WT_GBA - CT	0.000106889	0.00223019	FALSE	no hit	7.92028
TCAF1	Q9Y4C2|Q9Y4C2-2	TRPM8 channel-associated factor 1 OS=Homo sapiens GN=TCAF1 PE=1 SV=3|Isoform 2 of TRPM8 channel-associated factor 1 OS=Homo sapiens GN=TCAF1	16	0.341483	25.7448	WT_GBA - CT	0.000107116	0.00223019	FALSE	no hit	7.09013
DFFB	B4DZS0|O76075	DNA fragmentation factor subunit beta OS=Homo sapiens GN=DFFB PE=1 SV=1|DNA fragmentation factor subunit beta OS=Homo sapiens GN=DFFB PE=1 SV=1	2	0.411691	21.407	WT_GBA - CT	0.000108123	0.00224355	FALSE	no hit	6.18897
APBB1	J3KPL8|O00213|O00213-2	Amyloid beta A4 precursor protein-binding family B member 1 OS=Homo sapiens GN=APBB1 PE=1 SV=1|Amyloid beta A4 precursor protein-binding family B member 1 OS=Homo sapiens GN=APBB1 PE=1 SV=2|Isoform 2 of Amyloid beta A4 precursor protein-binding family B member 1 OS=Homo sapiens GN=APBB1	6	-0.271906	23.6149	WT_GBA - CT	0.000110422	0.00226282	FALSE	no hit	6.37927
TUBB6	Q9BUF5	Tubulin beta-6 chain OS=Homo sapiens GN=TUBB6 PE=1 SV=1	5	-0.291074	24.5419	WT_GBA - CT	0.000110647	0.00226282	FALSE	no hit	7.33031
RER1	O15258|Q9P0H9	Protein RER1 OS=Homo sapiens GN=RER1 PE=1 SV=1|Protein RER1 OS=Homo sapiens GN=RER1 PE=1 SV=1	4	0.497118	24.3127	WT_GBA - CT	0.000110756	0.00226282	FALSE	no hit	7.37898
JUN	P05412	Transcription factor AP-1 OS=Homo sapiens GN=JUN PE=1 SV=2	2	-0.552651	21.4709	WT_GBA - CT	0.000110781	0.00226282	FALSE	no hit	6.17925
FAM193B	H0YCX2|Q96PV7|Q96PV7-2	Protein FAM193B (Fragment) OS=Homo sapiens GN=FAM193B PE=1 SV=1|Protein FAM193B OS=Homo sapiens GN=FAM193B PE=1 SV=3|Isoform 2 of Protein FAM193B OS=Homo sapiens GN=FAM193B	5	0.358748	24.0691	WT_GBA - CT	0.000111134	0.00226282	FALSE	no hit	6.33781
ACOT7	O00154-4	Isoform 4 of Cytosolic acyl coenzyme A thioester hydrolase OS=Homo sapiens GN=ACOT7	12	0.28101	26.1556	WT_GBA - CT	0.000111262	0.00226282	FALSE	no hit	7.7413
NSUN2	Q08J23|Q08J23-2	tRNA (cytosine(34)-C(5))-methyltransferase OS=Homo sapiens GN=NSUN2 PE=1 SV=2|Isoform 2 of tRNA (cytosine(34)-C(5))-methyltransferase OS=Homo sapiens GN=NSUN2	40	-0.321297	27.9153	WT_GBA - CT	0.000114359	0.00231812	FALSE	no hit	7.87243
CUL4A	Q13619	Cullin-4A OS=Homo sapiens GN=CUL4A PE=1 SV=3	4	-0.428767	23.5255	WT_GBA - CT	0.000117239	0.00236521	FALSE	no hit	6.78412
PEX14	O75381|O75381-2	Peroxisomal membrane protein PEX14 OS=Homo sapiens GN=PEX14 PE=1 SV=1|Isoform 2 of Peroxisomal membrane protein PEX14 OS=Homo sapiens GN=PEX14	9	0.34472	25.1875	WT_GBA - CT	0.000117599	0.00236521	FALSE	no hit	7.35081
PARVA	J3KNQ4|Q9NVD7	Alpha-parvin OS=Homo sapiens GN=PARVA PE=1 SV=1|Alpha-parvin OS=Homo sapiens GN=PARVA PE=1 SV=1	6	0.504283	24.988	WT_GBA - CT	0.000117837	0.00236521	FALSE	no hit	6.81888
MYO1C	F5H6E2|O00159|O00159-3	Unconventional myosin-Ic OS=Homo sapiens GN=MYO1C PE=1 SV=1|Unconventional myosin-Ic OS=Homo sapiens GN=MYO1C PE=1 SV=4|Isoform 3 of Unconventional myosin-Ic OS=Homo sapiens GN=MYO1C	17	-0.291876	25.483	WT_GBA - CT	0.000118471	0.00236608	FALSE	no hit	6.87667
PLS1	Q14651	Plastin-1 OS=Homo sapiens GN=PLS1 PE=1 SV=2	12	-0.424035	25.1642	WT_GBA - CT	0.000118651	0.00236608	FALSE	no hit	6.6425
SEC63	Q9UGP8	Translocation protein SEC63 homolog OS=Homo sapiens GN=SEC63 PE=1 SV=2	19	0.350782	26.5694	WT_GBA - CT	0.000119085	0.00236706	FALSE	no hit	7.70781
BRAT1	Q6PJG6	BRCA1-associated ATM activator 1 OS=Homo sapiens GN=BRAT1 PE=1 SV=2	5	0.378648	23.0535	WT_GBA - CT	0.00011977	0.002373	FALSE	no hit	6.74682
METTL2B	Q6P1Q9	Methyltransferase-like protein 2B OS=Homo sapiens GN=METTL2B PE=1 SV=3	5	0.37205	23.9257	WT_GBA - CT	0.000122913	0.00242744	FALSE	no hit	6.95754
DPH1	I3L1H5|Q9BZG8	Diphthamide biosynthesis protein 1 (Fragment) OS=Homo sapiens GN=DPH1 PE=1 SV=1|Diphthamide biosynthesis protein 1 OS=Homo sapiens GN=DPH1 PE=1 SV=2	7	0.349417	24.7005	WT_GBA - CT	0.000125317	0.00246318	FALSE	no hit	7.09052
SAMHD1	Q9Y3Z3|Q9Y3Z3-3|Q9Y3Z3-4	Deoxynucleoside triphosphate triphosphohydrolase SAMHD1 OS=Homo sapiens GN=SAMHD1 PE=1 SV=2|Isoform 3 of Deoxynucleoside triphosphate triphosphohydrolase SAMHD1 OS=Homo sapiens GN=SAMHD1|Isoform 4 of Deoxynucleoside triphosphate triphosphohydrolase SAMHD1 OS=Homo sapiens GN=SAMHD1	29	-0.395161	26.5315	WT_GBA - CT	0.000125679	0.00246318	FALSE	no hit	7.30994
SH3GLB2	B7ZC38|Q9NR46	Endophilin-B2 OS=Homo sapiens GN=SH3GLB2 PE=1 SV=1|Endophilin-B2 OS=Homo sapiens GN=SH3GLB2 PE=1 SV=1	12	-0.386085	25.4097	WT_GBA - CT	0.000125926	0.00246318	FALSE	no hit	7.48427
PTPN11	Q06124-2	Isoform 2 of Tyrosine-protein phosphatase non-receptor type 11 OS=Homo sapiens GN=PTPN11	23	-0.289619	26.5459	WT_GBA - CT	0.000128494	0.00250042	FALSE	no hit	7.55651
BIRC2	A0A087X2B2|E9PMH5|Q13490|Q13490-2	Baculoviral IAP repeat-containing protein 2 OS=Homo sapiens GN=BIRC2 PE=1 SV=1|Baculoviral IAP repeat-containing protein 2 OS=Homo sapiens GN=BIRC2 PE=1 SV=2|Isoform 2 of Baculoviral IAP repeat-containing protein 2 OS=Homo sapiens GN=BIRC2	6	-0.277201	24.1581	WT_GBA - CT	0.000128644	0.00250042	FALSE	no hit	6.33167
PDDC1	Q8NB37	Parkinson disease 7 domain-containing protein 1 OS=Homo sapiens GN=PDDC1 PE=1 SV=1	5	-0.325562	24.0968	WT_GBA - CT	0.000131552	0.00254887	FALSE	no hit	6.8976
SLC27A2	O14975|O14975-2	Very long-chain acyl-CoA synthetase OS=Homo sapiens GN=SLC27A2 PE=1 SV=2|Isoform 2 of Very long-chain acyl-CoA synthetase OS=Homo sapiens GN=SLC27A2	7	-0.290794	24.2563	WT_GBA - CT	0.000134573	0.00259805	FALSE	no hit	6.81936
FAM177A1	Q8N128|Q8N128-2	Protein FAM177A1 OS=Homo sapiens GN=FAM177A1 PE=1 SV=1|Isoform 2 of Protein FAM177A1 OS=Homo sapiens GN=FAM177A1	5	0.285779	24.1435	WT_GBA - CT	0.000134936	0.00259805	FALSE	no hit	6.3685
NEO1	Q92859|Q92859-2|Q92859-3|Q92859-4	Neogenin OS=Homo sapiens GN=NEO1 PE=1 SV=2|Isoform 2 of Neogenin OS=Homo sapiens GN=NEO1|Isoform 3 of Neogenin OS=Homo sapiens GN=NEO1|Isoform 4 of Neogenin OS=Homo sapiens GN=NEO1	2	0.38751	22.2453	WT_GBA - CT	0.000135689	0.00260437	FALSE	no hit	6.05071
PPP6R2	O75170|O75170-2|O75170-3|O75170-4|O75170-5	Serine/threonine-protein phosphatase 6 regulatory subunit 2 OS=Homo sapiens GN=PPP6R2 PE=1 SV=2|Isoform 2 of Serine/threonine-protein phosphatase 6 regulatory subunit 2 OS=Homo sapiens GN=PPP6R2|Isoform 3 of Serine/threonine-protein phosphatase 6 regulatory subunit 2 OS=Homo sapiens GN=PPP6R2|Isoform 4 of Serine/threonine-protein phosphatase 6 regulatory subunit 2 OS=Homo sapiens GN=PPP6R2|Isofor…	7	0.384438	23.7088	WT_GBA - CT	0.000137204	0.00262526	FALSE	no hit	6.43372
STT3A	P46977	Dolichyl-diphosphooligosaccharide--protein glycosyltransferase subunit STT3A OS=Homo sapiens GN=STT3A PE=1 SV=2	11	0.26328	25.7377	WT_GBA - CT	0.00013791	0.00263056	FALSE	no hit	7.53302
RPS19BP1	Q86WX3	Active regulator of SIRT1 OS=Homo sapiens GN=RPS19BP1 PE=1 SV=1	4	0.384647	23.6786	WT_GBA - CT	0.000140331	0.00266846	FALSE	no hit	6.49774
RHEB	C9J931|Q15382	GTP-binding protein Rheb OS=Homo sapiens GN=RHEB PE=1 SV=1|GTP-binding protein Rheb OS=Homo sapiens GN=RHEB PE=1 SV=1	5	0.385983	25.5555	WT_GBA - CT	0.000140937	0.00267171	FALSE	no hit	7.51933
QRSL1	Q9H0R6	Glutamyl-tRNA(Gln) amidotransferase subunit A, mitochondrial OS=Homo sapiens GN=QRSL1 PE=1 SV=2	4	0.298737	23.1454	WT_GBA - CT	0.000142422	0.00269153	FALSE	no hit	6.55904
CKB	P12277	Creatine kinase B-type OS=Homo sapiens GN=CKB PE=1 SV=1	24	-0.378977	28.2659	WT_GBA - CT	0.000142859	0.00269153	FALSE	no hit	8.52667
PALM	O75781	Paralemmin-1 OS=Homo sapiens GN=PALM PE=1 SV=2	3	-1.05229	22.7527	WT_GBA - CT	0.000143725	0.00269956	TRUE	hit	6.36825
CDCA2	Q69YH5	Cell division cycle-associated protein 2 OS=Homo sapiens GN=CDCA2 PE=1 SV=2	3	0.430882	23.3824	WT_GBA - CT	0.000144178	0.00269982	FALSE	no hit	5.97492
PIEZO1	Q92508	Piezo-type mechanosensitive ion channel component 1 OS=Homo sapiens GN=PIEZO1 PE=1 SV=4	4	-0.443244	23.1754	WT_GBA - CT	0.000146608	0.00273699	FALSE	no hit	6.07809
AFF4	Q9UHB7	AF4/FMR2 family member 4 OS=Homo sapiens GN=AFF4 PE=1 SV=1	15	-0.309956	25.3469	WT_GBA - CT	0.00014779	0.00275068	FALSE	no hit	6.81772
ATP6V1E1	P36543	V-type proton ATPase subunit E 1 OS=Homo sapiens GN=ATP6V1E1 PE=1 SV=1	13	-0.485747	26.2044	WT_GBA - CT	0.0001484	0.00275369	FALSE	no hit	7.531
RABAC1	M0R3D4|Q9UI14	Prenylated Rab acceptor protein 1 OS=Homo sapiens GN=RABAC1 PE=1 SV=1|Prenylated Rab acceptor protein 1 OS=Homo sapiens GN=RABAC1 PE=1 SV=1	4	0.367218	23.6421	WT_GBA - CT	0.00014956	0.00276686	FALSE	no hit	6.87373
AKAP9	A0A0A0MRF6|Q99996|Q99996-2|Q99996-3|Q99996-5|Q99996-6	A-kinase anchor protein 9 OS=Homo sapiens GN=AKAP9 PE=1 SV=1|A-kinase anchor protein 9 OS=Homo sapiens GN=AKAP9 PE=1 SV=3|Isoform 2 of A-kinase anchor protein 9 OS=Homo sapiens GN=AKAP9|Isoform 3 of A-kinase anchor protein 9 OS=Homo sapiens GN=AKAP9|Isoform 5 of A-kinase anchor protein 9 OS=Homo sapiens GN=AKAP9|Isoform 6 of A-kinase anchor protein 9 OS=Homo sapiens GN=AKAP9	53	0.350058	27.2221	WT_GBA - CT	0.000151702	0.00279806	FALSE	no hit	6.88866
AP4E1	Q9UPM8	AP-4 complex subunit epsilon-1 OS=Homo sapiens GN=AP4E1 PE=1 SV=2	2	0.477017	22.791	WT_GBA - CT	0.000152173	0.00279835	FALSE	no hit	5.86108
ACTR6	F8W057|Q9GZN1	Actin-related protein 6 OS=Homo sapiens GN=ACTR6 PE=1 SV=1|Actin-related protein 6 OS=Homo sapiens GN=ACTR6 PE=1 SV=1	8	0.365814	24.3509	WT_GBA - CT	0.000153071	0.00280646	FALSE	no hit	6.41851
MAN2A1	Q16706	Alpha-mannosidase 2 OS=Homo sapiens GN=MAN2A1 PE=1 SV=2	3	-0.386842	23.4562	WT_GBA - CT	0.000155695	0.00284606	FALSE	no hit	6.11578
MOXD1	Q6UVY6|Q6UVY6-2	DBH-like monooxygenase protein 1 OS=Homo sapiens GN=MOXD1 PE=1 SV=1|Isoform 2 of DBH-like monooxygenase protein 1 OS=Homo sapiens GN=MOXD1	3	-0.510281	23.0658	WT_GBA - CT	0.000157749	0.00287194	FALSE	no hit	6.40864
PURB	Q96QR8	Transcriptional activator protein Pur-beta OS=Homo sapiens GN=PURB PE=1 SV=3	6	-0.39464	24.9189	WT_GBA - CT	0.000158812	0.00287194	FALSE	no hit	7.01574
RRBP1	A0A0A0MRV0|Q9P2E9|Q9P2E9-2	Isoform 1 of Ribosome-binding protein 1 OS=Homo sapiens GN=RRBP1|Ribosome-binding protein 1 OS=Homo sapiens GN=RRBP1 PE=1 SV=1|Ribosome-binding protein 1 OS=Homo sapiens GN=RRBP1 PE=1 SV=4	87	0.285588	29.1162	WT_GBA - CT	0.000158824	0.00287194	FALSE	no hit	8.08636
SLC25A17	B0QYW5|F6RTR7|O43808	Peroxisomal membrane protein PMP34 OS=Homo sapiens GN=SLC25A17 PE=1 SV=1|Peroxisomal membrane protein PMP34 OS=Homo sapiens GN=SLC25A17 PE=1 SV=1|Peroxisomal membrane protein PMP34 OS=Homo sapiens GN=SLC25A17 PE=1 SV=1	2	0.357978	22.7021	WT_GBA - CT	0.000158981	0.00287194	FALSE	no hit	6.58902
SEL1L	Q9UBV2	Protein sel-1 homolog 1 OS=Homo sapiens GN=SEL1L PE=1 SV=3	4	0.364964	23.6823	WT_GBA - CT	0.000160139	0.00288437	FALSE	no hit	6.90528
GPAT3	Q53EU6	Glycerol-3-phosphate acyltransferase 3 OS=Homo sapiens GN=GPAT3 PE=1 SV=2	5	0.308564	23.7985	WT_GBA - CT	0.000163093	0.002929	FALSE	no hit	6.60423
SEC31A	D6REX3|O94979	Protein transport protein Sec31A OS=Homo sapiens GN=SEC31A PE=1 SV=1|Protein transport protein Sec31A OS=Homo sapiens GN=SEC31A PE=1 SV=3	27	0.258671	26.998	WT_GBA - CT	0.000165283	0.00295967	FALSE	no hit	7.38627
PRKAR1B	P31321	cAMP-dependent protein kinase type I-beta regulatory subunit OS=Homo sapiens GN=PRKAR1B PE=1 SV=4	3	-0.602888	22.1187	WT_GBA - CT	0.000167323	0.00298749	FALSE	candidate	6.36695
SCD	O00767	Acyl-CoA desaturase OS=Homo sapiens GN=SCD PE=1 SV=2	4	0.602689	24.5886	WT_GBA - CT	0.000170318	0.00303216	FALSE	candidate	7.06878
C4ORF3	Q8WVX3|Q8WVX3-2	Uncharacterized protein C4orf3 OS=Homo sapiens GN=C4orf3 PE=1 SV=2|Isoform 2 of Uncharacterized protein C4orf3 OS=Homo sapiens GN=C4orf3	2	0.472202	22.4462	WT_GBA - CT	0.000173431	0.00306559	FALSE	no hit	6.86651
ATN1	P54259	Atrophin-1 OS=Homo sapiens GN=ATN1 PE=1 SV=3	2	-0.483062	22.192	WT_GBA - CT	0.000173484	0.00306559	FALSE	no hit	6.34023
TDP2	O95551|O95551-2	Tyrosyl-DNA phosphodiesterase 2 OS=Homo sapiens GN=TDP2 PE=1 SV=1|Isoform 2 of Tyrosyl-DNA phosphodiesterase 2 OS=Homo sapiens GN=TDP2	7	0.342037	24.7427	WT_GBA - CT	0.000174503	0.00306559	FALSE	no hit	7.03738
PPP1R12A	O14974	Protein phosphatase 1 regulatory subunit 12A OS=Homo sapiens GN=PPP1R12A PE=1 SV=1	37	-0.312703	27.3063	WT_GBA - CT	0.000174658	0.00306559	FALSE	no hit	7.36292
NVL	O15381	Nuclear valosin-containing protein-like OS=Homo sapiens GN=NVL PE=1 SV=1	19	-0.418768	25.8357	WT_GBA - CT	0.000174692	0.00306559	FALSE	no hit	6.71489
PYGB	P11216	Glycogen phosphorylase, brain form OS=Homo sapiens GN=PYGB PE=1 SV=5	21	-0.280195	26.4175	WT_GBA - CT	0.000175407	0.00306938	FALSE	no hit	7.20338
ACOT13	Q9NPJ3|Q9NPJ3-2	Acyl-coenzyme A thioesterase 13 OS=Homo sapiens GN=ACOT13 PE=1 SV=1|Isoform 2 of Acyl-coenzyme A thioesterase 13 OS=Homo sapiens GN=ACOT13	2	0.349752	23.2349	WT_GBA - CT	0.000184743	0.00321795	FALSE	no hit	7.14864
AMPH	P49418|P49418-2	Amphiphysin OS=Homo sapiens GN=AMPH PE=1 SV=1|Isoform 2 of Amphiphysin OS=Homo sapiens GN=AMPH	2	-0.545483	21.2622	WT_GBA - CT	0.000184946	0.00321795	FALSE	no hit	5.91988
MTR	Q99707	Methionine synthase OS=Homo sapiens GN=MTR PE=1 SV=2	15	0.354558	25.2666	WT_GBA - CT	0.000186146	0.00322969	FALSE	no hit	7.01321
PRDM2	Q13029|Q13029-2|Q13029-3|Q13029-5	PR domain zinc finger protein 2 OS=Homo sapiens GN=PRDM2 PE=1 SV=3|Isoform 2 of PR domain zinc finger protein 2 OS=Homo sapiens GN=PRDM2|Isoform 3 of PR domain zinc finger protein 2 OS=Homo sapiens GN=PRDM2|Isoform 5 of PR domain zinc finger protein 2 OS=Homo sapiens GN=PRDM2	2	0.350181	21.8316	WT_GBA - CT	0.000187735	0.00324807	FALSE	no hit	5.91479
METAP1	P53582	Methionine aminopeptidase 1 OS=Homo sapiens GN=METAP1 PE=1 SV=2	6	-0.285693	25.2546	WT_GBA - CT	0.000188454	0.00325137	FALSE	no hit	6.83548
C5ORF22	Q49AR2	UPF0489 protein C5orf22 OS=Homo sapiens GN=C5orf22 PE=1 SV=2	9	0.483341	24.998	WT_GBA - CT	0.000189627	0.00325519	FALSE	no hit	6.94571
PHLDB3	Q6NSJ2	Pleckstrin homology-like domain family B member 3 OS=Homo sapiens GN=PHLDB3 PE=2 SV=3	2	0.366255	22.8168	WT_GBA - CT	0.000189736	0.00325519	FALSE	no hit	6.42327
MET	P08581|P08581-2	Hepatocyte growth factor receptor OS=Homo sapiens GN=MET PE=1 SV=4|Isoform 2 of Hepatocyte growth factor receptor OS=Homo sapiens GN=MET	3	0.349949	22.9756	WT_GBA - CT	0.000190558	0.00326018	FALSE	no hit	6.29637
M6PR	P20645	Cation-dependent mannose-6-phosphate receptor OS=Homo sapiens GN=M6PR PE=1 SV=1	8	-0.309089	25.0984	WT_GBA - CT	0.000192065	0.00327684	FALSE	no hit	7.53575
TOP2A	P11388|P11388-2|P11388-3|P11388-4	DNA topoisomerase 2-alpha OS=Homo sapiens GN=TOP2A PE=1 SV=3|Isoform 2 of DNA topoisomerase 2-alpha OS=Homo sapiens GN=TOP2A|Isoform 3 of DNA topoisomerase 2-alpha OS=Homo sapiens GN=TOP2A|Isoform 4 of DNA topoisomerase 2-alpha OS=Homo sapiens GN=TOP2A	11	-0.490853	25.3488	WT_GBA - CT	0.000193109	0.00327913	FALSE	no hit	6.84191
PPIL1	Q9Y3C6	Peptidyl-prolyl cis-trans isomerase-like 1 OS=Homo sapiens GN=PPIL1 PE=1 SV=1	6	0.404111	25.4424	WT_GBA - CT	0.000193267	0.00327913	FALSE	no hit	7.60254
OXR1	Q8N573-2|Q8N573-8	Isoform 2 of Oxidation resistance protein 1 OS=Homo sapiens GN=OXR1|Isoform 8 of Oxidation resistance protein 1 OS=Homo sapiens GN=OXR1	15	-0.298549	25.3614	WT_GBA - CT	0.000194318	0.00328788	FALSE	no hit	6.66
CBLB	B5MC15|Q13191|Q13191-2|Q13191-3	Cas-Br-M (Murine) ecotropic retroviral transforming sequence b, isoform CRA_a OS=Homo sapiens GN=CBLB PE=1 SV=1|E3 ubiquitin-protein ligase CBL-B OS=Homo sapiens GN=CBLB PE=1 SV=2|Isoform Truncated 1 of E3 ubiquitin-protein ligase CBL-B OS=Homo sapiens GN=CBLB|Isoform Truncated 2 of E3 ubiquitin-protein ligase CBL-B OS=Homo sapiens GN=CBLB	3	0.633972	22.6812	WT_GBA - CT	0.000195335	0.00329601	FALSE	candidate	5.87645
TAB1	Q15750	TGF-beta-activated kinase 1 and MAP3K7-binding protein 1 OS=Homo sapiens GN=TAB1 PE=1 SV=1	14	0.280927	25.069	WT_GBA - CT	0.00019603	0.00329867	FALSE	no hit	6.90446
ALDH4A1	P30038	Delta-1-pyrroline-5-carboxylate dehydrogenase, mitochondrial OS=Homo sapiens GN=ALDH4A1 PE=1 SV=3	15	0.345649	25.8026	WT_GBA - CT	0.000196924	0.00330466	FALSE	no hit	7.07204
HLTF	A0A0C4DGA6|Q14527	Helicase-like transcription factor OS=Homo sapiens GN=HLTF PE=1 SV=1|Helicase-like transcription factor OS=Homo sapiens GN=HLTF PE=1 SV=2	10	-0.302832	25.1731	WT_GBA - CT	0.00019752	0.00330563	FALSE	no hit	6.78309
MBLAC1	A4D2B0|C9JAV3	Metallo-beta-lactamase domain-containing protein 1 OS=Homo sapiens GN=MBLAC1 PE=1 SV=1|Metallo-beta-lactamase domain-containing protein 1 (Fragment) OS=Homo sapiens GN=MBLAC1 PE=1 SV=1	2	0.2957	22.5036	WT_GBA - CT	0.000199468	0.00332917	FALSE	no hit	6.29542
TCF20	Q9UGU0|Q9UGU0-2	Transcription factor 20 OS=Homo sapiens GN=TCF20 PE=1 SV=3|Isoform 2 of Transcription factor 20 OS=Homo sapiens GN=TCF20	2	0.56152	22.4711	WT_GBA - CT	0.000202167	0.00336112	FALSE	no hit	6.24219
NRM	H0Y6T6|Q8IXM6	Nurim (Fragment) OS=Homo sapiens GN=NRM PE=1 SV=1|Nurim OS=Homo sapiens GN=NRM PE=1 SV=1	2	0.392891	22.6991	WT_GBA - CT	0.000202477	0.00336112	FALSE	no hit	6.36665
TUT1	F5H0R1|Q9H6E5	Speckle targeted PIP5K1A-regulated poly(A) polymerase OS=Homo sapiens GN=TUT1 PE=1 SV=1|Speckle targeted PIP5K1A-regulated poly(A) polymerase OS=Homo sapiens GN=TUT1 PE=1 SV=2	5	0.278614	23.2556	WT_GBA - CT	0.000205495	0.00340202	FALSE	no hit	6.57824
MACROD1	Q9BQ69	O-acetyl-ADP-ribose deacetylase MACROD1 OS=Homo sapiens GN=MACROD1 PE=1 SV=2	3	-0.501648	23.1701	WT_GBA - CT	0.000206878	0.00341409	FALSE	no hit	6.81415
UBE2J2	B1AMF0|Q8N2K1|Q8N2K1-3	Ubiquitin-conjugating enzyme E2 J2 (Fragment) OS=Homo sapiens GN=UBE2J2 PE=1 SV=1|Ubiquitin-conjugating enzyme E2 J2 OS=Homo sapiens GN=UBE2J2 PE=1 SV=3|Isoform 3 of Ubiquitin-conjugating enzyme E2 J2 OS=Homo sapiens GN=UBE2J2	3	0.402537	23.1019	WT_GBA - CT	0.000207336	0.00341409	FALSE	no hit	6.36725
SPATA5	Q8NB90	Spermatogenesis-associated protein 5 OS=Homo sapiens GN=SPATA5 PE=1 SV=3	10	0.491771	24.8594	WT_GBA - CT	0.000216069	0.00354838	FALSE	no hit	6.59096
ZFPL1	O95159	Zinc finger protein-like 1 OS=Homo sapiens GN=ZFPL1 PE=1 SV=2	2	0.352535	22.059	WT_GBA - CT	0.00021908	0.00358825	FALSE	no hit	6.30773
SEC23B	Q15437	Protein transport protein Sec23B OS=Homo sapiens GN=SEC23B PE=1 SV=2	16	0.323875	25.5185	WT_GBA - CT	0.000220886	0.00360819	FALSE	no hit	7.36046
TMEM41B	E9PJ42|Q5BJD5|Q5BJD5-2|Q5BJD5-3	Transmembrane protein 41B OS=Homo sapiens GN=TMEM41B PE=1 SV=1|Transmembrane protein 41B OS=Homo sapiens GN=TMEM41B PE=1 SV=1|Isoform 2 of Transmembrane protein 41B OS=Homo sapiens GN=TMEM41B|Isoform 3 of Transmembrane protein 41B OS=Homo sapiens GN=TMEM41B	2	0.411092	23.9925	WT_GBA - CT	0.000222381	0.00362298	FALSE	no hit	7.19404
PRDX2	P32119	Peroxiredoxin-2 OS=Homo sapiens GN=PRDX2 PE=1 SV=5	11	-0.388255	26.4544	WT_GBA - CT	0.000224033	0.00362691	FALSE	no hit	8.44726
NECAP2	Q9NVZ3	Adaptin ear-binding coat-associated protein 2 OS=Homo sapiens GN=NECAP2 PE=1 SV=1	5	0.389653	24.6034	WT_GBA - CT	0.000224318	0.00362691	FALSE	no hit	6.96425
MSRB2	Q9Y3D2	Methionine-R-sulfoxide reductase B2, mitochondrial OS=Homo sapiens GN=MSRB2 PE=1 SV=2	3	-0.397959	23.1127	WT_GBA - CT	0.000224393	0.00362691	FALSE	no hit	6.59001
RUFY2	H0YD93|Q8WXA3|Q8WXA3-2|Q8WXA3-3	RUN and FYVE domain-containing protein 2 (Fragment) OS=Homo sapiens GN=RUFY2 PE=1 SV=1|RUN and FYVE domain-containing protein 2 OS=Homo sapiens GN=RUFY2 PE=1 SV=2|Isoform 2 of RUN and FYVE domain-containing protein 2 OS=Homo sapiens GN=RUFY2|Isoform 3 of RUN and FYVE domain-containing protein 2 OS=Homo sapiens GN=RUFY2	11	-0.273067	24.7824	WT_GBA - CT	0.000225439	0.00363424	FALSE	no hit	6.52737
MSTO1	Q9BUK6|Q9BUK6-2|Q9BUK6-3	Protein misato homolog 1 OS=Homo sapiens GN=MSTO1 PE=1 SV=1|Isoform 2 of Protein misato homolog 1 OS=Homo sapiens GN=MSTO1|Isoform 3 of Protein misato homolog 1 OS=Homo sapiens GN=MSTO1	10	0.307839	24.981	WT_GBA - CT	0.000226916	0.00364848	FALSE	no hit	6.79381
NAPG	Q99747	Gamma-soluble NSF attachment protein OS=Homo sapiens GN=NAPG PE=1 SV=1	13	-0.324477	26.0175	WT_GBA - CT	0.000228369	0.00365893	FALSE	no hit	7.08742
WDR37	Q9Y2I8|Q9Y2I8-2	WD repeat-containing protein 37 OS=Homo sapiens GN=WDR37 PE=1 SV=2|Isoform 2 of WD repeat-containing protein 37 OS=Homo sapiens GN=WDR37	6	-0.284552	24.0196	WT_GBA - CT	0.000228758	0.00365893	FALSE	no hit	7.28623
GALNT1	Q10472	Polypeptide N-acetylgalactosaminyltransferase 1 OS=Homo sapiens GN=GALNT1 PE=1 SV=1	4	0.326512	23.279	WT_GBA - CT	0.000229428	0.00365958	FALSE	no hit	6.32805
ARMC10	Q8N2F6|Q8N2F6-2|Q8N2F6-3|Q8N2F6-4|Q8N2F6-5|Q8N2F6-6	Armadillo repeat-containing protein 10 OS=Homo sapiens GN=ARMC10 PE=1 SV=1|Isoform 2 of Armadillo repeat-containing protein 10 OS=Homo sapiens GN=ARMC10|Isoform 3 of Armadillo repeat-containing protein 10 OS=Homo sapiens GN=ARMC10|Isoform 4 of Armadillo repeat-containing protein 10 OS=Homo sapiens GN=ARMC10|Isoform 5 of Armadillo repeat-containing protein 10 OS=Homo sapiens GN=ARMC10|Isoform 6 of…	3	0.480203	23.4584	WT_GBA - CT	0.00022999	0.00365958	FALSE	no hit	6.90391
ATP1B1	P05026|P05026-2	Sodium/potassium-transporting ATPase subunit beta-1 OS=Homo sapiens GN=ATP1B1 PE=1 SV=1|Isoform 2 of Sodium/potassium-transporting ATPase subunit beta-1 OS=Homo sapiens GN=ATP1B1	8	0.271476	24.5375	WT_GBA - CT	0.000231932	0.00367497	FALSE	no hit	7.10075
CFDP1	Q9UEE9	Craniofacial development protein 1 OS=Homo sapiens GN=CFDP1 PE=1 SV=1	13	-0.499413	26.3403	WT_GBA - CT	0.000232154	0.00367497	FALSE	no hit	7.39011
ZNF483	Q8TF39	Zinc finger protein 483 OS=Homo sapiens GN=ZNF483 PE=1 SV=3	3	-0.394246	22.6128	WT_GBA - CT	0.000236654	0.00373658	FALSE	no hit	6.22799
CDKAL1	Q5VV42	Threonylcarbamoyladenosine tRNA methylthiotransferase OS=Homo sapiens GN=CDKAL1 PE=1 SV=1	11	0.377145	25.4325	WT_GBA - CT	0.000237996	0.00374813	FALSE	no hit	6.91971
IRF3	M0QZB7|M0QZB8|M0R205|Q14653|Q14653-4	Interferon regulatory factor 3 OS=Homo sapiens GN=IRF3 PE=1 SV=1|Interferon regulatory factor 3 OS=Homo sapiens GN=IRF3 PE=1 SV=1|Interferon regulatory factor 3 (Fragment) OS=Homo sapiens GN=IRF3 PE=1 SV=1|Interferon regulatory factor 3 OS=Homo sapiens GN=IRF3 PE=1 SV=1|Isoform 4 of Interferon regulatory factor 3 OS=Homo sapiens GN=IRF3	3	-0.25875	22.9447	WT_GBA - CT	0.000241683	0.00379647	FALSE	no hit	6.41639
GAN	Q9H2C0	Gigaxonin OS=Homo sapiens GN=GAN PE=1 SV=1	6	-0.277648	23.816	WT_GBA - CT	0.000244198	0.00382619	FALSE	no hit	6.372
DCUN1D1	Q96GG9	DCN1-like protein 1 OS=Homo sapiens GN=DCUN1D1 PE=1 SV=1	4	-0.328936	23.8704	WT_GBA - CT	0.000244849	0.00382662	FALSE	no hit	6.59056
MICALL1	Q8N3F8	MICAL-like protein 1 OS=Homo sapiens GN=MICALL1 PE=1 SV=2	15	0.335446	25.4226	WT_GBA - CT	0.000250391	0.00389792	FALSE	no hit	6.98664
DDOST	A0A0C4DGS1|P39656	Dolichyl-diphosphooligosaccharide--protein glycosyltransferase 48 kDa subunit OS=Homo sapiens GN=DDOST PE=1 SV=1|Dolichyl-diphosphooligosaccharide--protein glycosyltransferase 48 kDa subunit OS=Homo sapiens GN=DDOST PE=1 SV=4	12	0.272908	25.5814	WT_GBA - CT	0.00025068	0.00389792	FALSE	no hit	7.8762
SELK	F6XHT0|F8WAX7|Q9Y6D0	Selenoprotein K OS=Homo sapiens GN=SELK PE=1 SV=1|Selenoprotein K OS=Homo sapiens GN=SELK PE=1 SV=1|Selenoprotein K OS=Homo sapiens GN=SELK PE=1 SV=3	2	0.319165	22.3886	WT_GBA - CT	0.000253758	0.00393581	FALSE	no hit	6.6346
FHIT	P49789	Bis(5'-adenosyl)-triphosphatase OS=Homo sapiens GN=FHIT PE=1 SV=3	2	-0.376599	21.7367	WT_GBA - CT	0.000254491	0.00393724	FALSE	no hit	6.27888
LYSMD3	Q7Z3D4	LysM and putative peptidoglycan-binding domain-containing protein 3 OS=Homo sapiens GN=LYSMD3 PE=1 SV=2	4	0.569713	22.3412	WT_GBA - CT	0.000259092	0.00399835	FALSE	no hit	5.978
DNAJC16	Q9Y2G8	DnaJ homolog subfamily C member 16 OS=Homo sapiens GN=DNAJC16 PE=2 SV=3	7	0.328146	24.6304	WT_GBA - CT	0.000259985	0.00400207	FALSE	no hit	6.48911
KYAT3	Q6YP21|Q6YP21-3	Kynurenine--oxoglutarate transaminase 3 OS=Homo sapiens GN=KYAT3 PE=1 SV=1|Isoform 3 of Kynurenine--oxoglutarate transaminase 3 OS=Homo sapiens GN=KYAT3	9	-0.319352	25.5542	WT_GBA - CT	0.000261319	0.00401255	FALSE	no hit	7.13012
MYDGF	Q969H8	Myeloid-derived growth factor OS=Homo sapiens GN=MYDGF PE=1 SV=1	7	0.444988	25.3984	WT_GBA - CT	0.000264199	0.00403708	FALSE	no hit	7.16305
SRSF4	Q08170	Serine/arginine-rich splicing factor 4 OS=Homo sapiens GN=SRSF4 PE=1 SV=2	11	-0.28269	26.5532	WT_GBA - CT	0.000264231	0.00403708	FALSE	no hit	7.58662
PDIA5	Q14554	Protein disulfide-isomerase A5 OS=Homo sapiens GN=PDIA5 PE=1 SV=1	8	0.39519	24.8256	WT_GBA - CT	0.000265648	0.00404865	FALSE	no hit	6.80162
OS9	Q13438|Q13438-7	Isoform 7 of Protein OS-9 OS=Homo sapiens GN=OS9|Protein OS-9 OS=Homo sapiens GN=OS9 PE=1 SV=1	11	0.386907	25.1756	WT_GBA - CT	0.000270629	0.00411437	FALSE	no hit	7.18943
KIF1B	O60333-2|O60333-3	Isoform 2 of Kinesin-like protein KIF1B OS=Homo sapiens GN=KIF1B|Isoform 3 of Kinesin-like protein KIF1B OS=Homo sapiens GN=KIF1B	13	0.279086	25.5087	WT_GBA - CT	0.00027332	0.00414501	FALSE	no hit	6.63958
NFIA	B1AKN5|B1AKN7|B1AKN8|Q12857|Q12857-3|Q12857-4	Nuclear factor 1 OS=Homo sapiens GN=NFIA PE=1 SV=1|Nuclear factor 1 OS=Homo sapiens GN=NFIA PE=1 SV=1|Nuclear factor 1 OS=Homo sapiens GN=NFIA PE=1 SV=1|Nuclear factor 1 A-type OS=Homo sapiens GN=NFIA PE=1 SV=2|Isoform 3 of Nuclear factor 1 A-type OS=Homo sapiens GN=NFIA|Isoform 4 of Nuclear factor 1 A-type OS=Homo sapiens GN=NFIA	2	-0.347246	22.89	WT_GBA - CT	0.000275167	0.00414583	FALSE	no hit	6.16226
POLRMT	K7EMH3|O00411	DNA-directed RNA polymerase, mitochondrial (Fragment) OS=Homo sapiens GN=POLRMT PE=1 SV=4|DNA-directed RNA polymerase, mitochondrial OS=Homo sapiens GN=POLRMT PE=1 SV=2	15	-0.301793	25.6844	WT_GBA - CT	0.000275215	0.00414583	FALSE	no hit	7.16679
SCARF2	A0A096LNX8	Scavenger receptor class F member 2 OS=Homo sapiens GN=SCARF2 PE=1 SV=1	4	0.395119	22.6942	WT_GBA - CT	0.000275399	0.00414583	FALSE	no hit	6.06642
SMARCA2	P51531|P51531-2	Probable global transcription activator SNF2L2 OS=Homo sapiens GN=SMARCA2 PE=1 SV=2|Isoform Short of Probable global transcription activator SNF2L2 OS=Homo sapiens GN=SMARCA2	6	-0.306885	23.329	WT_GBA - CT	0.000277134	0.00416176	FALSE	no hit	6.46135
RABL6	Q3YEC7	Rab-like protein 6 OS=Homo sapiens GN=RABL6 PE=1 SV=2	11	-0.282168	25.4452	WT_GBA - CT	0.000278763	0.00416935	FALSE	no hit	7.25975
SSBP1	A0A0G2JLD8|C9K0U8|E7EUY5|Q04837	Single-stranded DNA-binding protein, mitochondrial (Fragment) OS=Homo sapiens GN=SSBP1 PE=1 SV=1|Single-stranded DNA-binding protein, mitochondrial OS=Homo sapiens GN=SSBP1 PE=1 SV=1	9	0.325146	26.8889	WT_GBA - CT	0.000278998	0.00416935	FALSE	no hit	8.35027
NANS	Q9NR45	Sialic acid synthase OS=Homo sapiens GN=NANS PE=1 SV=2	13	0.33127	26.5381	WT_GBA - CT	0.000280828	0.00418652	FALSE	no hit	7.79324
TSC1	Q92574|Q92574-2	Hamartin OS=Homo sapiens GN=TSC1 PE=1 SV=2|Isoform 2 of Hamartin OS=Homo sapiens GN=TSC1	3	-0.249933	23.6196	WT_GBA - CT	0.000284418	0.00422773	FALSE	no hit	6.28999
DEGS1	O15121	Sphingolipid delta(4)-desaturase DES1 OS=Homo sapiens GN=DEGS1 PE=1 SV=1	4	0.395653	22.8477	WT_GBA - CT	0.000284969	0.00422773	FALSE	no hit	6.91716
CYBA	P13498	Cytochrome b-245 light chain OS=Homo sapiens GN=CYBA PE=1 SV=3	2	0.484414	22.3146	WT_GBA - CT	0.000287074	0.00424822	FALSE	no hit	7.25824
HIP1	O00291	Huntingtin-interacting protein 1 OS=Homo sapiens GN=HIP1 PE=1 SV=5	12	-0.318185	25.6274	WT_GBA - CT	0.000287734	0.00424822	FALSE	no hit	7.16623
NEDD1	Q8NHV4|Q8NHV4-3	Protein NEDD1 OS=Homo sapiens GN=NEDD1 PE=1 SV=1|Isoform 3 of Protein NEDD1 OS=Homo sapiens GN=NEDD1	15	-0.280908	25.9866	WT_GBA - CT	0.000303614	0.00447193	FALSE	no hit	7.04583
LPCAT1	Q8NF37	Lysophosphatidylcholine acyltransferase 1 OS=Homo sapiens GN=LPCAT1 PE=1 SV=2	9	0.266699	25.3098	WT_GBA - CT	0.000310886	0.00456809	FALSE	no hit	7.28893
SMC5	Q8IY18	Structural maintenance of chromosomes protein 5 OS=Homo sapiens GN=SMC5 PE=1 SV=2	4	-0.268787	23.4447	WT_GBA - CT	0.000312531	0.0045813	FALSE	no hit	6.23809
ASNS	P08243|P08243-2	Asparagine synthetase [glutamine-hydrolyzing] OS=Homo sapiens GN=ASNS PE=1 SV=4|Isoform 2 of Asparagine synthetase [glutamine-hydrolyzing] OS=Homo sapiens GN=ASNS	27	0.485511	27.5755	WT_GBA - CT	0.000315022	0.00460682	FALSE	no hit	8.29522
GTSE1	Q9NYZ3	G2 and S phase-expressed protein 1 OS=Homo sapiens GN=GTSE1 PE=1 SV=3	10	0.265793	24.4288	WT_GBA - CT	0.000316042	0.00461077	FALSE	no hit	6.81723
OAT	P04181	Ornithine aminotransferase, mitochondrial OS=Homo sapiens GN=OAT PE=1 SV=1	19	-0.320111	26.5443	WT_GBA - CT	0.000319748	0.00465378	FALSE	no hit	8.00159
TNPO3	Q9Y5L0	Transportin-3 OS=Homo sapiens GN=TNPO3 PE=1 SV=3	13	0.378697	25.5106	WT_GBA - CT	0.000324715	0.00470641	FALSE	no hit	7.11783
MYO1D	O94832	Unconventional myosin-Id OS=Homo sapiens GN=MYO1D PE=1 SV=2	21	-0.248276	26.2308	WT_GBA - CT	0.000324897	0.00470641	FALSE	no hit	7.37094
IRS2	Q9Y4H2	Insulin receptor substrate 2 OS=Homo sapiens GN=IRS2 PE=1 SV=2	7	-0.54711	24.0292	WT_GBA - CT	0.000326708	0.00471972	FALSE	no hit	6.68667
ARGLU1	Q9NWB6	Arginine and glutamate-rich protein 1 OS=Homo sapiens GN=ARGLU1 PE=1 SV=1	15	-0.254142	26.2443	WT_GBA - CT	0.000328064	0.00471972	FALSE	no hit	7.58965
RBBP7	C9JAJ9|E9PC52|Q16576|Q16576-2	Histone-binding protein RBBP7 (Fragment) OS=Homo sapiens GN=RBBP7 PE=1 SV=1|Histone-binding protein RBBP7 OS=Homo sapiens GN=RBBP7 PE=1 SV=1|Isoform 2 of Histone-binding protein RBBP7 OS=Homo sapiens GN=RBBP7	10	-0.262373	26.2658	WT_GBA - CT	0.000328121	0.00471972	FALSE	no hit	7.9394
GM2A	P17900	Ganglioside GM2 activator OS=Homo sapiens GN=GM2A PE=1 SV=4	3	0.277335	24.1172	WT_GBA - CT	0.000329642	0.00473052	FALSE	no hit	6.92672
ETHE1	M0QXB5|O95571	Persulfide dioxygenase ETHE1, mitochondrial OS=Homo sapiens GN=ETHE1 PE=1 SV=1|Persulfide dioxygenase ETHE1, mitochondrial OS=Homo sapiens GN=ETHE1 PE=1 SV=2	4	-0.414902	22.7689	WT_GBA - CT	0.000330989	0.00473877	FALSE	no hit	6.45233
PUM3	Q15397	Pumilio homolog 3 OS=Homo sapiens GN=PUM3 PE=1 SV=3	7	-0.294661	24.2106	WT_GBA - CT	0.000333066	0.00475742	FALSE	no hit	6.4148
ADSS	P30520	Adenylosuccinate synthetase isozyme 2 OS=Homo sapiens GN=ADSS PE=1 SV=3	18	-0.285585	26.0401	WT_GBA - CT	0.000334913	0.0047727	FALSE	no hit	7.83251
C3ORF58	Q8NDZ4	Deleted in autism protein 1 OS=Homo sapiens GN=C3orf58 PE=1 SV=1	2	-0.280304	22.1117	WT_GBA - CT	0.000335782	0.00477401	FALSE	no hit	6.32456
PREPL	Q4J6C6	Prolyl endopeptidase-like OS=Homo sapiens GN=PREPL PE=1 SV=1	7	0.249488	24.0319	WT_GBA - CT	0.000340245	0.00482629	FALSE	no hit	6.8855
SRC	P12931|P12931-2	Proto-oncogene tyrosine-protein kinase Src OS=Homo sapiens GN=SRC PE=1 SV=3|Isoform 2 of Proto-oncogene tyrosine-protein kinase Src OS=Homo sapiens GN=SRC	3	-0.468278	23.0901	WT_GBA - CT	0.000344032	0.00486877	FALSE	no hit	6.91774
ACTR8	Q9H981	Actin-related protein 8 OS=Homo sapiens GN=ACTR8 PE=1 SV=2	5	0.381243	24.0376	WT_GBA - CT	0.000350841	0.00494856	FALSE	no hit	6.77867
SPCS3	P61009	Signal peptidase complex subunit 3 OS=Homo sapiens GN=SPCS3 PE=1 SV=1	3	0.796734	23.785	WT_GBA - CT	0.000351865	0.00494856	FALSE	candidate	6.62953
SPEN	Q96T58	Msx2-interacting protein OS=Homo sapiens GN=SPEN PE=1 SV=1	41	0.302618	26.7803	WT_GBA - CT	0.000352088	0.00494856	FALSE	no hit	7.01068
SBF1	O95248-4	Isoform 4 of Myotubularin-related protein 5 OS=Homo sapiens GN=SBF1	16	0.283796	25.2969	WT_GBA - CT	0.000354459	0.00497006	FALSE	no hit	7.00492
NOSIP	A0A075B6F9|Q9Y314	Nitric oxide synthase-interacting protein OS=Homo sapiens GN=NOSIP PE=1 SV=1|Nitric oxide synthase-interacting protein OS=Homo sapiens GN=NOSIP PE=1 SV=1	13	0.344944	25.4263	WT_GBA - CT	0.000355235	0.00497006	FALSE	no hit	7.25761
STEAP3	Q658P3|Q658P3-2|Q658P3-3	Metalloreductase STEAP3 OS=Homo sapiens GN=STEAP3 PE=1 SV=2|Isoform 2 of Metalloreductase STEAP3 OS=Homo sapiens GN=STEAP3|Isoform 3 of Metalloreductase STEAP3 OS=Homo sapiens GN=STEAP3	6	0.385838	24.2965	WT_GBA - CT	0.000356219	0.0049725	FALSE	no hit	6.8975
PTPN13	Q12923|Q12923-3|Q12923-4	Tyrosine-protein phosphatase non-receptor type 13 OS=Homo sapiens GN=PTPN13 PE=1 SV=2|Isoform 3 of Tyrosine-protein phosphatase non-receptor type 13 OS=Homo sapiens GN=PTPN13|Isoform 4 of Tyrosine-protein phosphatase non-receptor type 13 OS=Homo sapiens GN=PTPN13	15	0.297273	25.6937	WT_GBA - CT	0.000358611	0.00499453	FALSE	no hit	6.66441
YRDC	Q86U90	YrdC domain-containing protein, mitochondrial OS=Homo sapiens GN=YRDC PE=1 SV=1	11	0.326423	25.1114	WT_GBA - CT	0.000365653	0.00507616	FALSE	no hit	7.1889
SORBS1	Q9BX66-12|Q9BX66-5|Q9BX66-6|Q9BX66-8|Q9BX66-9|S4R303	Isoform 12 of Sorbin and SH3 domain-containing protein 1 OS=Homo sapiens GN=SORBS1|Isoform 5 of Sorbin and SH3 domain-containing protein 1 OS=Homo sapiens GN=SORBS1|Isoform 6 of Sorbin and SH3 domain-containing protein 1 OS=Homo sapiens GN=SORBS1|Isoform 8 of Sorbin and SH3 domain-containing protein 1 OS=Homo sapiens GN=SORBS1|Isoform 9 of Sorbin and SH3 domain-containing protein 1 OS=Homo sapien…	8	-0.459952	23.1774	WT_GBA - CT	0.000366125	0.00507616	FALSE	no hit	5.99941
TSPAN6	A0A087WYV6|A0A087WZU5|O43657	Tetraspanin-6 OS=Homo sapiens GN=TSPAN6 PE=1 SV=1|Tetraspanin-6 OS=Homo sapiens GN=TSPAN6 PE=1 SV=1|Tetraspanin-6 OS=Homo sapiens GN=TSPAN6 PE=1 SV=1	3	0.379571	23.4714	WT_GBA - CT	0.000368692	0.00509075	FALSE	no hit	6.88864
HSPA1L	P34931|Q53FA3	Heat shock 70 kDa protein 1-like OS=Homo sapiens GN=HSPA1L PE=1 SV=2|Heat shock 70 kDa protein 1-like (Fragment) OS=Homo sapiens GN=HSPA1L PE=1 SV=1	3	0.527572	23.9044	WT_GBA - CT	0.000368835	0.00509075	FALSE	no hit	6.8178
LAMC1	P11047	Laminin subunit gamma-1 OS=Homo sapiens GN=LAMC1 PE=1 SV=3	46	0.249827	27.2833	WT_GBA - CT	0.000373385	0.00514199	FALSE	no hit	7.21648
MYH9	P35579	Myosin-9 OS=Homo sapiens GN=MYH9 PE=1 SV=4	115	0.293215	29.828	WT_GBA - CT	0.000377199	0.0051829	FALSE	no hit	8.23798
SNX5	Q9Y5X3	Sorting nexin-5 OS=Homo sapiens GN=SNX5 PE=1 SV=1	15	-0.267854	25.9594	WT_GBA - CT	0.000378298	0.00518406	FALSE	no hit	7.16348
MAP2K3	P46734|P46734-3	Dual specificity mitogen-activated protein kinase kinase 3 OS=Homo sapiens GN=MAP2K3 PE=1 SV=2|Isoform 2 of Dual specificity mitogen-activated protein kinase kinase 3 OS=Homo sapiens GN=MAP2K3	5	-0.231127	24.1561	WT_GBA - CT	0.000378971	0.00518406	FALSE	no hit	7.05028
DPYSL2	Q16555	Dihydropyrimidinase-related protein 2 OS=Homo sapiens GN=DPYSL2 PE=1 SV=1	18	-0.367398	25.9584	WT_GBA - CT	0.000384375	0.0052463	FALSE	no hit	7.50001
PRDX3	P30048|P30048-2	Thioredoxin-dependent peroxide reductase, mitochondrial OS=Homo sapiens GN=PRDX3 PE=1 SV=3|Isoform 2 of Thioredoxin-dependent peroxide reductase, mitochondrial OS=Homo sapiens GN=PRDX3	10	-0.549457	26.2992	WT_GBA - CT	0.000395696	0.00538883	FALSE	no hit	8.35817
E9PI62|MTG1	E9PI62|Q9BT17|U3KQ69	Mitochondrial GTPase 1 OS=Homo sapiens PE=3 SV=1|Mitochondrial ribosome-associated GTPase 1 OS=Homo sapiens GN=MTG1 PE=1 SV=2|Mitochondrial GTPase 1 OS=Homo sapiens GN=MTG1 PE=3 SV=1	6	0.261023	23.7436	WT_GBA - CT	0.000405139	0.00550522	FALSE	no hit	6.53697
SLC4A2	P04920|P04920-2|P04920-3	Anion exchange protein 2 OS=Homo sapiens GN=SLC4A2 PE=1 SV=4|Isoform B1 of Anion exchange protein 2 OS=Homo sapiens GN=SLC4A2|Isoform 3 of Anion exchange protein 2 OS=Homo sapiens GN=SLC4A2	7	0.391635	23.9194	WT_GBA - CT	0.000412762	0.00559644	FALSE	no hit	6.56414
CPNE1	B0QZ18|E7EV27|F2Z2V0|Q99829	Copine-1 OS=Homo sapiens GN=CPNE1 PE=1 SV=1|Copine-1 OS=Homo sapiens GN=CPNE1 PE=1 SV=1|Copine-1 (Fragment) OS=Homo sapiens GN=CPNE1 PE=1 SV=1|Copine-1 OS=Homo sapiens GN=CPNE1 PE=1 SV=1	7	-0.428857	25.4613	WT_GBA - CT	0.000414948	0.00561368	FALSE	no hit	7.57808
SRPK2	P78362-2	Isoform 2 of SRSF protein kinase 2 OS=Homo sapiens GN=SRPK2	10	0.298694	25.6429	WT_GBA - CT	0.000425244	0.00573696	FALSE	no hit	7.43106
DDX55	F5H5U2|Q8NHQ9	ATP-dependent RNA helicase DDX55 OS=Homo sapiens GN=DDX55 PE=1 SV=1|ATP-dependent RNA helicase DDX55 OS=Homo sapiens GN=DDX55 PE=1 SV=3	11	-0.332203	25.3195	WT_GBA - CT	0.000425929	0.00573696	FALSE	no hit	6.88568
CEP135	Q66GS9	Centrosomal protein of 135 kDa OS=Homo sapiens GN=CEP135 PE=1 SV=2	5	-0.265417	23.502	WT_GBA - CT	0.000428592	0.00574345	FALSE	no hit	5.72464
C14ORF80	Q86SX3-6	Isoform 6 of Uncharacterized protein C14orf80 OS=Homo sapiens GN=C14orf80	4	0.270778	23.0367	WT_GBA - CT	0.000428723	0.00574345	FALSE	no hit	6.05037
SQLE	Q14534	Squalene monooxygenase OS=Homo sapiens GN=SQLE PE=1 SV=3	8	0.390881	23.6402	WT_GBA - CT	0.000429216	0.00574345	FALSE	no hit	6.36982
CCBL1	B7Z4W5	Cysteine conjugate-beta lyase cytoplasmic (Glutamine transaminase K, kyneurenine aminotransferase), isoform CRA_b OS=Homo sapiens GN=CCBL1 PE=1 SV=1	3	-0.365873	23.8641	WT_GBA - CT	0.000440208	0.00587773	FALSE	no hit	5.77605
SETMAR	Q53H47|Q53H47-3	Histone-lysine N-methyltransferase SETMAR OS=Homo sapiens GN=SETMAR PE=1 SV=2|Isoform 3 of Histone-lysine N-methyltransferase SETMAR OS=Homo sapiens GN=SETMAR	2	-0.351089	22.5375	WT_GBA - CT	0.000441548	0.00588284	FALSE	no hit	6.19143
E7EQ34|GOSR2	E7EQ34|O14653|O14653-2|O14653-3	Uncharacterized protein OS=Homo sapiens PE=4 SV=2|Golgi SNAP receptor complex member 2 OS=Homo sapiens GN=GOSR2 PE=1 SV=2|Isoform B of Golgi SNAP receptor complex member 2 OS=Homo sapiens GN=GOSR2|Isoform 3 of Golgi SNAP receptor complex member 2 OS=Homo sapiens GN=GOSR2	5	0.308203	24.2956	WT_GBA - CT	0.000446717	0.00593217	FALSE	no hit	7.15261
FBLIM1	Q8WUP2	Filamin-binding LIM protein 1 OS=Homo sapiens GN=FBLIM1 PE=1 SV=2	8	0.296186	24.3642	WT_GBA - CT	0.000447182	0.00593217	FALSE	no hit	6.86421
IVNS1ABP	Q9Y6Y0	Influenza virus NS1A-binding protein OS=Homo sapiens GN=IVNS1ABP PE=1 SV=3	2	0.262428	22.8749	WT_GBA - CT	0.000453097	0.00596889	FALSE	no hit	6.13458
LMO7	J3KP06|Q8WWI1|Q8WWI1-2|Q8WWI1-3|Q8WWI1-4	LIM domain only protein 7 OS=Homo sapiens GN=LMO7 PE=1 SV=2|LIM domain only protein 7 OS=Homo sapiens GN=LMO7 PE=1 SV=3|Isoform 2 of LIM domain only protein 7 OS=Homo sapiens GN=LMO7|Isoform 3 of LIM domain only protein 7 OS=Homo sapiens GN=LMO7|Isoform 4 of LIM domain only protein 7 OS=Homo sapiens GN=LMO7	2	-0.561354	21.3241	WT_GBA - CT	0.000453295	0.00596889	FALSE	no hit	5.86953
ALKBH1	Q13686	DNA demethylase ALKBH1 OS=Homo sapiens GN=ALKBH1 PE=1 SV=2	4	0.440113	22.5084	WT_GBA - CT	0.000453796	0.00596889	FALSE	no hit	6.10145
VPS37A	Q8NEZ2|Q8NEZ2-2	Vacuolar protein sorting-associated protein 37A OS=Homo sapiens GN=VPS37A PE=1 SV=1|Isoform 2 of Vacuolar protein sorting-associated protein 37A OS=Homo sapiens GN=VPS37A	3	-0.290462	22.9456	WT_GBA - CT	0.000453838	0.00596889	FALSE	no hit	6.18999
NUDT5	A6NFX8|Q9UKK9	ADP-sugar pyrophosphatase OS=Homo sapiens GN=NUDT5 PE=1 SV=1|ADP-sugar pyrophosphatase OS=Homo sapiens GN=NUDT5 PE=1 SV=1	15	-0.262205	26.0863	WT_GBA - CT	0.000457168	0.00599984	FALSE	no hit	7.71717
ACBD7	Q8N6N7	Acyl-CoA-binding domain-containing protein 7 OS=Homo sapiens GN=ACBD7 PE=1 SV=1	4	-0.530248	23.2234	WT_GBA - CT	0.000458402	0.00600164	FALSE	no hit	6.33117
NUCB2|HEL	A0A087WSV8|V9HW75	Nucleobindin 2, isoform CRA_b OS=Homo sapiens GN=NUCB2 PE=1 SV=1|Epididymis secretory protein Li 109 OS=Homo sapiens GN=HEL-S-109 PE=1 SV=1	21	0.468117	26.5348	WT_GBA - CT	0.000459259	0.00600164	FALSE	no hit	7.48776
NOTCH2	Q04721	Neurogenic locus notch homolog protein 2 OS=Homo sapiens GN=NOTCH2 PE=1 SV=3	14	0.240825	25.3688	WT_GBA - CT	0.000462621	0.00603274	FALSE	no hit	6.63065
NUCB1	Q02818	Nucleobindin-1 OS=Homo sapiens GN=NUCB1 PE=1 SV=4	20	0.537233	26.2565	WT_GBA - CT	0.000465699	0.00606	FALSE	no hit	7.49887
HSD17B8	Q92506	Estradiol 17-beta-dehydrogenase 8 OS=Homo sapiens GN=HSD17B8 PE=1 SV=2	3	0.573901	22.555	WT_GBA - CT	0.00047613	0.00616516	FALSE	no hit	6.34515
B3GALT6	Q96L58	Beta-1,3-galactosyltransferase 6 OS=Homo sapiens GN=B3GALT6 PE=1 SV=2	3	0.329491	23.0739	WT_GBA - CT	0.000476549	0.00616516	FALSE	no hit	6.19124
ACYP1	G3V2U7|P07311	Acylphosphatase OS=Homo sapiens GN=ACYP1 PE=1 SV=1|Acylphosphatase-1 OS=Homo sapiens GN=ACYP1 PE=1 SV=2	5	-0.419651	24.8979	WT_GBA - CT	0.000476791	0.00616516	FALSE	no hit	7.32788
AP4M1	C9JC87|C9JWL4|O00189	AP-4 complex subunit mu-1 OS=Homo sapiens GN=AP4M1 PE=1 SV=1|AP-4 complex subunit mu-1 (Fragment) OS=Homo sapiens GN=AP4M1 PE=1 SV=1|AP-4 complex subunit mu-1 OS=Homo sapiens GN=AP4M1 PE=1 SV=2	3	0.531695	22.4123	WT_GBA - CT	0.000480668	0.00620193	FALSE	no hit	6.13286
C2ORF49	Q9BVC5	Ashwin OS=Homo sapiens GN=C2orf49 PE=1 SV=1	5	-0.245881	23.3229	WT_GBA - CT	0.000481654	0.00620193	FALSE	no hit	6.86182
GPD1L	Q8N335	Glycerol-3-phosphate dehydrogenase 1-like protein OS=Homo sapiens GN=GPD1L PE=1 SV=1	10	-0.291183	25.2474	WT_GBA - CT	0.000484331	0.00622335	FALSE	no hit	6.93395
DHX32	Q7L7V1|Q7L7V1-2	Putative pre-mRNA-splicing factor ATP-dependent RNA helicase DHX32 OS=Homo sapiens GN=DHX32 PE=1 SV=1|Isoform 2 of Putative pre-mRNA-splicing factor ATP-dependent RNA helicase DHX32 OS=Homo sapiens GN=DHX32	2	0.346164	21.253	WT_GBA - CT	0.000491076	0.00629684	FALSE	no hit	5.80131
ARV1	A0A0A0MRI7|H7C484|Q9H2C2	Protein ARV1 OS=Homo sapiens GN=ARV1 PE=1 SV=1|Protein ARV1 (Fragment) OS=Homo sapiens GN=ARV1 PE=1 SV=1|Protein ARV1 OS=Homo sapiens GN=ARV1 PE=2 SV=1	2	0.44404	23.7905	WT_GBA - CT	0.000493878	0.00631958	FALSE	no hit	6.44593
ALKBH6	Q3KRA9|Q3KRA9-2	Alpha-ketoglutarate-dependent dioxygenase alkB homolog 6 OS=Homo sapiens GN=ALKBH6 PE=1 SV=2|Isoform 2 of Alpha-ketoglutarate-dependent dioxygenase alkB homolog 6 OS=Homo sapiens GN=ALKBH6	4	0.396599	23.0621	WT_GBA - CT	0.000496232	0.00633651	FALSE	no hit	6.76692
COQ5	Q5HYK3	2-methoxy-6-polyprenyl-1,4-benzoquinol methylase, mitochondrial OS=Homo sapiens GN=COQ5 PE=1 SV=2	4	0.355215	22.6766	WT_GBA - CT	0.000498564	0.00634528	FALSE	no hit	6.56944
P3H3	Q8IVL6|Q8IVL6-2	Prolyl 3-hydroxylase 3 OS=Homo sapiens GN=P3H3 PE=1 SV=1|Isoform 2 of Prolyl 3-hydroxylase 3 OS=Homo sapiens GN=P3H3	8	-0.476386	24.097	WT_GBA - CT	0.000498986	0.00634528	FALSE	no hit	6.62762
NEBL	O76041-2	Isoform 2 of Nebulette OS=Homo sapiens GN=NEBL	9	-0.333029	24.8267	WT_GBA - CT	0.000501881	0.00636892	FALSE	no hit	6.65712
CRAT	P43155|P43155-2	Carnitine O-acetyltransferase OS=Homo sapiens GN=CRAT PE=1 SV=5|Isoform 2 of Carnitine O-acetyltransferase OS=Homo sapiens GN=CRAT	3	-0.339274	22.909	WT_GBA - CT	0.000504173	0.00638481	FALSE	no hit	6.05689
DACH1	A0A087WZP2|Q9UI36|Q9UI36-2	Dachshund homolog 1 OS=Homo sapiens GN=DACH1 PE=1 SV=1|Dachshund homolog 1 OS=Homo sapiens GN=DACH1 PE=1 SV=3|Isoform 2 of Dachshund homolog 1 OS=Homo sapiens GN=DACH1	8	0.258253	24.9724	WT_GBA - CT	0.000506819	0.00640511	FALSE	no hit	7.00074
FAM199X	Q6PEV8|Q6PEV8-2	Protein FAM199X OS=Homo sapiens GN=FAM199X PE=1 SV=1|Isoform 2 of Protein FAM199X OS=Homo sapiens GN=FAM199X	2	0.619886	23.5463	WT_GBA - CT	0.000509333	0.00641864	FALSE	candidate	5.79337
SOGA1	O94964-2	Isoform 2 of Protein SOGA1 OS=Homo sapiens GN=SOGA1	2	-0.643006	22.1517	WT_GBA - CT	0.00050998	0.00641864	FALSE	candidate	5.92412
PGM2L1	Q6PCE3	Glucose 1,6-bisphosphate synthase OS=Homo sapiens GN=PGM2L1 PE=1 SV=3	4	-0.325612	23.838	WT_GBA - CT	0.000513579	0.00645072	FALSE	no hit	6.30192
MTAP	B4DUC8|Q13126	S-methyl-5'-thioadenosine phosphorylase OS=Homo sapiens GN=MTAP PE=1 SV=1|S-methyl-5'-thioadenosine phosphorylase OS=Homo sapiens GN=MTAP PE=1 SV=2	7	-0.256133	24.4292	WT_GBA - CT	0.00051749	0.00648658	FALSE	no hit	7.12157
DDX51	Q8N8A6	ATP-dependent RNA helicase DDX51 OS=Homo sapiens GN=DDX51 PE=1 SV=3	9	0.271398	24.4487	WT_GBA - CT	0.000525836	0.00657777	FALSE	no hit	6.91892
TTC13	Q8NBP0	Tetratricopeptide repeat protein 13 OS=Homo sapiens GN=TTC13 PE=2 SV=3	10	0.218567	24.5104	WT_GBA - CT	0.000531133	0.00663052	FALSE	no hit	6.61341
KPNA6	O60684	Importin subunit alpha-7 OS=Homo sapiens GN=KPNA6 PE=1 SV=1	13	-0.27119	25.9619	WT_GBA - CT	0.000532664	0.00663615	FALSE	no hit	7.58493
TTYH3	Q9C0H2|Q9C0H2-2|Q9C0H2-4	Protein tweety homolog 3 OS=Homo sapiens GN=TTYH3 PE=1 SV=3|Isoform 2 of Protein tweety homolog 3 OS=Homo sapiens GN=TTYH3|Isoform 4 of Protein tweety homolog 3 OS=Homo sapiens GN=TTYH3	2	0.337705	22.5366	WT_GBA - CT	0.000543038	0.00675169	FALSE	no hit	6.72851
ERO1B	Q86YB8	ERO1-like protein beta OS=Homo sapiens GN=ERO1B PE=1 SV=2	12	0.275327	25.5051	WT_GBA - CT	0.000546283	0.00677252	FALSE	no hit	7.16203
PALM2	B1ALY0	Protein PALM2-AKAP2 (Fragment) OS=Homo sapiens GN=PALM2-AKAP2 PE=1 SV=1	3	-0.505711	23.423	WT_GBA - CT	0.000546918	0.00677252	FALSE	no hit	6.07025
KATNAL1	Q9BW62	Katanin p60 ATPase-containing subunit A-like 1 OS=Homo sapiens GN=KATNAL1 PE=1 SV=1	3	-0.340663	22.484	WT_GBA - CT	0.00056181	0.00693966	FALSE	no hit	5.89506
SMS	P52788	Spermine synthase OS=Homo sapiens GN=SMS PE=1 SV=2	16	-0.29708	26.6919	WT_GBA - CT	0.000562675	0.00693966	FALSE	no hit	7.92838
LRCH1	Q9Y2L9|Q9Y2L9-2|Q9Y2L9-3	Leucine-rich repeat and calponin homology domain-containing protein 1 OS=Homo sapiens GN=LRCH1 PE=1 SV=3|Isoform 2 of Leucine-rich repeat and calponin homology domain-containing protein 1 OS=Homo sapiens GN=LRCH1|Isoform 3 of Leucine-rich repeat and calponin homology domain-containing protein 1 OS=Homo sapiens GN=LRCH1	5	-0.283222	23.2596	WT_GBA - CT	0.000568922	0.00700264	FALSE	no hit	6.26001
KIAA1211	F5H1N7|Q6ZU35	Uncharacterized protein KIAA1211 OS=Homo sapiens GN=KIAA1211 PE=1 SV=1|Uncharacterized protein KIAA1211 OS=Homo sapiens GN=KIAA1211 PE=1 SV=3	2	-0.372442	22.4589	WT_GBA - CT	0.000570687	0.00701032	FALSE	no hit	6.0645
ZPR1	O75312	Zinc finger protein ZPR1 OS=Homo sapiens GN=ZPR1 PE=1 SV=1	12	0.259261	25.3266	WT_GBA - CT	0.00058253	0.00712515	FALSE	no hit	7.11944
CASP3	P42574	Caspase-3 OS=Homo sapiens GN=CASP3 PE=1 SV=2	4	-0.302913	23.6887	WT_GBA - CT	0.000582659	0.00712515	FALSE	no hit	7.37473
GK|GK3P	P32189|P32189-1|P32189-2|P32189-4|Q14409	Glycerol kinase OS=Homo sapiens GN=GK PE=1 SV=3|Isoform 1 of Glycerol kinase OS=Homo sapiens GN=GK|Isoform 2 of Glycerol kinase OS=Homo sapiens GN=GK|Isoform 4 of Glycerol kinase OS=Homo sapiens GN=GK|Putative glycerol kinase 3 OS=Homo sapiens GN=GK3P PE=5 SV=2	6	-1.40995	24.3492	WT_GBA - CT	0.000583515	0.00712515	TRUE	hit	6.64845
ABCF2	Q9UG63|Q9UG63-2	ATP-binding cassette sub-family F member 2 OS=Homo sapiens GN=ABCF2 PE=1 SV=2|Isoform 2 of ATP-binding cassette sub-family F member 2 OS=Homo sapiens GN=ABCF2	24	0.366177	27.2998	WT_GBA - CT	0.000587313	0.00715729	FALSE	no hit	7.66845
FTO	Q9C0B1	Alpha-ketoglutarate-dependent dioxygenase FTO OS=Homo sapiens GN=FTO PE=1 SV=3	16	-0.23689	25.8404	WT_GBA - CT	0.000592661	0.00720816	FALSE	no hit	7.0942
UBL7	Q96S82	Ubiquitin-like protein 7 OS=Homo sapiens GN=UBL7 PE=1 SV=2	4	0.499696	23.6754	WT_GBA - CT	0.000595492	0.00721625	FALSE	no hit	6.37252
CCDC138	Q96M89	Coiled-coil domain-containing protein 138 OS=Homo sapiens GN=CCDC138 PE=1 SV=1	5	-0.292011	23.5142	WT_GBA - CT	0.000595675	0.00721625	FALSE	no hit	5.88498
CLGN	O14967	Calmegin OS=Homo sapiens GN=CLGN PE=1 SV=1	3	-0.363937	22.9577	WT_GBA - CT	0.000596984	0.00721787	FALSE	no hit	6.29146
FAM96A	Q9H5X1	MIP18 family protein FAM96A OS=Homo sapiens GN=FAM96A PE=1 SV=1	2	-0.273784	23.2206	WT_GBA - CT	0.000604117	0.00728975	FALSE	no hit	6.81022
ZKSCAN1	P17029	Zinc finger protein with KRAB and SCAN domains 1 OS=Homo sapiens GN=ZKSCAN1 PE=1 SV=3	5	0.318797	23.2213	WT_GBA - CT	0.00060894	0.00733355	FALSE	no hit	6.38846
GNA11	P29992	Guanine nucleotide-binding protein subunit alpha-11 OS=Homo sapiens GN=GNA11 PE=1 SV=2	6	-0.422916	23.6322	WT_GBA - CT	0.000615121	0.00738717	FALSE	no hit	6.95188
RTFDC1	A0A0A0MQR2|Q9BY42	Protein RTF2 homolog OS=Homo sapiens GN=RTFDC1 PE=1 SV=1|Protein RTF2 homolog OS=Homo sapiens GN=RTFDC1 PE=1 SV=3	13	0.301104	26.234	WT_GBA - CT	0.000615798	0.00738717	FALSE	no hit	7.24401
RBM3	P98179	RNA-binding protein 3 OS=Homo sapiens GN=RBM3 PE=1 SV=1	6	0.399325	24.6892	WT_GBA - CT	0.000626268	0.00749812	FALSE	no hit	7.84311
STK24	B4DR80|Q9Y6E0-2	Serine/threonine-protein kinase 24 OS=Homo sapiens GN=STK24 PE=1 SV=1|Isoform A of Serine/threonine-protein kinase 24 OS=Homo sapiens GN=STK24	6	-0.372753	24.8757	WT_GBA - CT	0.000629993	0.00751732	FALSE	no hit	6.96739
GLA	P06280	Alpha-galactosidase A OS=Homo sapiens GN=GLA PE=1 SV=1	12	-0.48815	24.9413	WT_GBA - CT	0.000630319	0.00751732	FALSE	no hit	7.23988
ZDBF2	N0DVX5|Q9HCK1	DBF4-type zinc finger-containing protein 2 OS=Homo sapiens GN=ZDBF2 PE=1 SV=1|DBF4-type zinc finger-containing protein 2 OS=Homo sapiens GN=ZDBF2 PE=1 SV=3	6	0.363497	24.3972	WT_GBA - CT	0.000636653	0.00757815	FALSE	no hit	6.38735
ACAA2	A0A0B4J2A4|P42765	3-ketoacyl-CoA thiolase, mitochondrial OS=Homo sapiens GN=ACAA2 PE=1 SV=1|3-ketoacyl-CoA thiolase, mitochondrial OS=Homo sapiens GN=ACAA2 PE=1 SV=2	20	-0.218049	26.3288	WT_GBA - CT	0.000638484	0.00758524	FALSE	no hit	7.55154
TNRC6B	Q9UPQ9|Q9UPQ9-1	Trinucleotide repeat-containing gene 6B protein OS=Homo sapiens GN=TNRC6B PE=1 SV=4|Isoform 2 of Trinucleotide repeat-containing gene 6B protein OS=Homo sapiens GN=TNRC6B	11	0.397798	24.4778	WT_GBA - CT	0.000642208	0.0076051	FALSE	no hit	6.54681
MTX3	Q5HYI7|Q5HYI7-4	Metaxin-3 OS=Homo sapiens GN=MTX3 PE=1 SV=2|Isoform 3 of Metaxin-3 OS=Homo sapiens GN=MTX3	2	-0.467303	22.734	WT_GBA - CT	0.000642687	0.0076051	FALSE	no hit	6.06932
TMEM87A	Q8NBN3|Q8NBN3-3	Transmembrane protein 87A OS=Homo sapiens GN=TMEM87A PE=1 SV=3|Isoform 3 of Transmembrane protein 87A OS=Homo sapiens GN=TMEM87A	6	0.316511	25.038	WT_GBA - CT	0.00064387	0.0076051	FALSE	no hit	7.00601
PLOD1	Q02809|Q02809-2	Procollagen-lysine,2-oxoglutarate 5-dioxygenase 1 OS=Homo sapiens GN=PLOD1 PE=1 SV=2|Isoform 2 of Procollagen-lysine,2-oxoglutarate 5-dioxygenase 1 OS=Homo sapiens GN=PLOD1	18	0.230514	25.654	WT_GBA - CT	0.000652145	0.00768805	FALSE	no hit	7.38186
SLBP	E7EUV9|F8W8D3|H0YAE8|Q14493	Histone RNA hairpin-binding protein OS=Homo sapiens GN=SLBP PE=1 SV=1|Histone RNA hairpin-binding protein OS=Homo sapiens GN=SLBP PE=1 SV=1|Histone RNA hairpin-binding protein (Fragment) OS=Homo sapiens GN=SLBP PE=1 SV=1|Histone RNA hairpin-binding protein OS=Homo sapiens GN=SLBP PE=1 SV=1	5	-0.49139	24.7306	WT_GBA - CT	0.000653626	0.00769075	FALSE	no hit	7.04449
STAT5B	P51692	Signal transducer and activator of transcription 5B OS=Homo sapiens GN=STAT5B PE=1 SV=2	6	-0.297439	24.5903	WT_GBA - CT	0.000661044	0.00776316	FALSE	no hit	6.79568
BET1	H7C1N3|O15155	BET1 homolog (Fragment) OS=Homo sapiens GN=BET1 PE=1 SV=1|BET1 homolog OS=Homo sapiens GN=BET1 PE=1 SV=1	2	0.358887	22.24	WT_GBA - CT	0.000662687	0.00776761	FALSE	no hit	6.35181
RTN4	Q9NQC3	Reticulon-4 OS=Homo sapiens GN=RTN4 PE=1 SV=2	10	0.273831	24.8543	WT_GBA - CT	0.000674641	0.00789266	FALSE	no hit	7.22195
F5GYJ5	F5GYJ5	Uncharacterized protein OS=Homo sapiens PE=3 SV=1	2	-0.551802	22.6236	WT_GBA - CT	0.0006794	0.00793323	FALSE	no hit	6.13373
SLC9A3R1	O14745	Na(+)/H(+) exchange regulatory cofactor NHE-RF1 OS=Homo sapiens GN=SLC9A3R1 PE=1 SV=4	27	-0.272754	27.1415	WT_GBA - CT	0.000688582	0.00801821	FALSE	no hit	7.82021
CD59	E9PNW4|E9PR17|P13987	CD59 glycoprotein OS=Homo sapiens GN=CD59 PE=1 SV=1|CD59 glycoprotein OS=Homo sapiens GN=CD59 PE=1 SV=1|CD59 glycoprotein OS=Homo sapiens GN=CD59 PE=1 SV=1	3	-0.541368	23.6934	WT_GBA - CT	0.000689289	0.00801821	FALSE	no hit	7.07969
NDUFS2	O75306|O75306-2	NADH dehydrogenase [ubiquinone] iron-sulfur protein 2, mitochondrial OS=Homo sapiens GN=NDUFS2 PE=1 SV=2|Isoform 2 of NADH dehydrogenase [ubiquinone] iron-sulfur protein 2, mitochondrial OS=Homo sapiens GN=NDUFS2	14	0.355145	25.0648	WT_GBA - CT	0.000693417	0.00805098	FALSE	no hit	7.08721
LTA4H	P09960	Leukotriene A-4 hydrolase OS=Homo sapiens GN=LTA4H PE=1 SV=2	30	-0.231909	27.4793	WT_GBA - CT	0.000696596	0.00807263	FALSE	no hit	8.21582
FOXO3	O43524	Forkhead box protein O3 OS=Homo sapiens GN=FOXO3 PE=1 SV=1	5	0.333453	23.188	WT_GBA - CT	0.000701993	0.00811985	FALSE	no hit	6.25098
BBS2	H3BRL0|Q9BXC9	Bardet-Biedl syndrome 2 protein homolog OS=Homo sapiens GN=BBS2 PE=1 SV=1|Bardet-Biedl syndrome 2 protein OS=Homo sapiens GN=BBS2 PE=1 SV=1	4	0.261344	23.6429	WT_GBA - CT	0.000707355	0.0081665	FALSE	no hit	6.23678
DDX49	Q9Y6V7	Probable ATP-dependent RNA helicase DDX49 OS=Homo sapiens GN=DDX49 PE=1 SV=1	6	0.3833	24.2938	WT_GBA - CT	0.000710671	0.00818252	FALSE	no hit	6.50406
RPS6KB2	Q9UBS0	Ribosomal protein S6 kinase beta-2 OS=Homo sapiens GN=RPS6KB2 PE=1 SV=2	4	-0.31315	23.6773	WT_GBA - CT	0.000711408	0.00818252	FALSE	no hit	6.47676
FOXP4	B7ZBM3|Q8IVH2|Q8IVH2-2|Q8IVH2-3	Forkhead box protein P4 OS=Homo sapiens GN=FOXP4 PE=1 SV=1|Forkhead box protein P4 OS=Homo sapiens GN=FOXP4 PE=1 SV=1|Isoform 2 of Forkhead box protein P4 OS=Homo sapiens GN=FOXP4|Isoform 3 of Forkhead box protein P4 OS=Homo sapiens GN=FOXP4	4	0.31969	23.5871	WT_GBA - CT	0.000715648	0.0082142	FALSE	no hit	6.19561
NR2F2	P24468	COUP transcription factor 2 OS=Homo sapiens GN=NR2F2 PE=1 SV=1	2	-0.228582	22.741	WT_GBA - CT	0.000716837	0.0082142	FALSE	no hit	6.68555
WASF2	Q9Y6W5	Wiskott-Aldrich syndrome protein family member 2 OS=Homo sapiens GN=WASF2 PE=1 SV=3	9	-0.226088	25.2551	WT_GBA - CT	0.000718607	0.00821584	FALSE	no hit	7.27422
FAM129A	Q9BZQ8	Protein Niban OS=Homo sapiens GN=FAM129A PE=1 SV=1	5	-0.453473	23.8385	WT_GBA - CT	0.000719655	0.00821584	FALSE	no hit	6.35043
IQGAP2	Q13576	Ras GTPase-activating-like protein IQGAP2 OS=Homo sapiens GN=IQGAP2 PE=1 SV=4	37	-0.222236	26.9928	WT_GBA - CT	0.000725363	0.00826564	FALSE	no hit	7.2402
ACADSB	P45954	Short/branched chain specific acyl-CoA dehydrogenase, mitochondrial OS=Homo sapiens GN=ACADSB PE=1 SV=1	8	-0.227958	24.7583	WT_GBA - CT	0.000727294	0.0082723	FALSE	no hit	7.21178
H1FX	Q92522	Histone H1x OS=Homo sapiens GN=H1FX PE=1 SV=1	15	-0.477635	26.9648	WT_GBA - CT	0.000732554	0.00831673	FALSE	no hit	8.04034
UGGT1	Q9NYU2|Q9NYU2-2	UDP-glucose:glycoprotein glucosyltransferase 1 OS=Homo sapiens GN=UGGT1 PE=1 SV=3|Isoform 2 of UDP-glucose:glycoprotein glucosyltransferase 1 OS=Homo sapiens GN=UGGT1	30	0.291889	26.8685	WT_GBA - CT	0.000755462	0.00856098	FALSE	no hit	7.26153
CCNA2	P20248	Cyclin-A2 OS=Homo sapiens GN=CCNA2 PE=1 SV=2	6	0.510135	23.5195	WT_GBA - CT	0.000760972	0.00860339	FALSE	no hit	6.63583
TOM1L2	Q6ZVM7|Q6ZVM7-2	TOM1-like protein 2 OS=Homo sapiens GN=TOM1L2 PE=1 SV=1|Isoform 2 of TOM1-like protein 2 OS=Homo sapiens GN=TOM1L2	4	-0.28507	21.5932	WT_GBA - CT	0.000762007	0.00860339	FALSE	no hit	5.82705
ADAM17	P78536	Disintegrin and metalloproteinase domain-containing protein 17 OS=Homo sapiens GN=ADAM17 PE=1 SV=1	5	0.309763	23.7611	WT_GBA - CT	0.00076615	0.0086343	FALSE	no hit	6.26905
WDR73	Q6P4I2	WD repeat-containing protein 73 OS=Homo sapiens GN=WDR73 PE=1 SV=1	8	0.266646	24.4735	WT_GBA - CT	0.000770001	0.00865726	FALSE	no hit	6.92005
STT3B	Q8TCJ2	Dolichyl-diphosphooligosaccharide--protein glycosyltransferase subunit STT3B OS=Homo sapiens GN=STT3B PE=1 SV=1	10	0.366281	25.2069	WT_GBA - CT	0.000772553	0.00865726	FALSE	no hit	7.44723
MYEF2	A0A0A0MR39	Myelin expression factor 2 OS=Homo sapiens GN=MYEF2 PE=1 SV=1	17	-0.225002	26.1156	WT_GBA - CT	0.000773626	0.00865726	FALSE	no hit	7.20779
UHRF1BP1L	A0JNW5	UHRF1-binding protein 1-like OS=Homo sapiens GN=UHRF1BP1L PE=1 SV=2	3	-0.270242	22.9499	WT_GBA - CT	0.000773826	0.00865726	FALSE	no hit	5.99446
GALK1	P51570	Galactokinase OS=Homo sapiens GN=GALK1 PE=1 SV=1	12	-0.280103	25.8055	WT_GBA - CT	0.000775481	0.00866001	FALSE	no hit	7.49647
FBXO7	Q9Y3I1	F-box only protein 7 OS=Homo sapiens GN=FBXO7 PE=1 SV=1	4	0.252256	22.5059	WT_GBA - CT	0.000788147	0.00878548	FALSE	no hit	6.21022
KDM4A	O75164	Lysine-specific demethylase 4A OS=Homo sapiens GN=KDM4A PE=1 SV=2	11	0.318444	24.8457	WT_GBA - CT	0.000794612	0.0088415	FALSE	no hit	6.57343
RGS7	A0A0A0MRI6|A0A0A0MSE0|B7Z223|P49802|P49802-2|P49802-3|P49802-4|P49802-5	Regulator of G-protein-signaling 7 OS=Homo sapiens GN=RGS7 PE=1 SV=1|Regulator of G-protein-signaling 7 OS=Homo sapiens GN=RGS7 PE=1 SV=1|Regulator of G-protein-signaling 7 OS=Homo sapiens GN=RGS7 PE=1 SV=1|Regulator of G-protein signaling 7 OS=Homo sapiens GN=RGS7 PE=1 SV=3|Isoform 2 of Regulator of G-protein signaling 7 OS=Homo sapiens GN=RGS7|Isoform 3 of Regulator of G-protein signaling 7 OS=…	3	-0.251708	21.6611	WT_GBA - CT	0.000799859	0.00888379	FALSE	no hit	5.69992
ZNHIT6	Q9NWK9	Box C/D snoRNA protein 1 OS=Homo sapiens GN=ZNHIT6 PE=1 SV=1	13	0.379203	25.4743	WT_GBA - CT	0.000803557	0.00890875	FALSE	no hit	6.73195
HP1BP3	Q5SSJ5	Heterochromatin protein 1-binding protein 3 OS=Homo sapiens GN=HP1BP3 PE=1 SV=1	21	-0.331218	26.6456	WT_GBA - CT	0.000808866	0.00894163	FALSE	no hit	7.53519
XPNPEP3	Q9NQH7|Q9NQH7-2|Q9NQH7-4	Probable Xaa-Pro aminopeptidase 3 OS=Homo sapiens GN=XPNPEP3 PE=1 SV=1|Isoform 2 of Probable Xaa-Pro aminopeptidase 3 OS=Homo sapiens GN=XPNPEP3|Isoform 4 of Probable Xaa-Pro aminopeptidase 3 OS=Homo sapiens GN=XPNPEP3	7	0.271623	24.4723	WT_GBA - CT	0.000809434	0.00894163	FALSE	no hit	6.9989
MTFR1L	E9PLD2|Q9H019|Q9H019-3	Mitochondrial fission regulator 1-like OS=Homo sapiens GN=MTFR1L PE=1 SV=1|Mitochondrial fission regulator 1-like OS=Homo sapiens GN=MTFR1L PE=1 SV=2|Isoform 3 of Mitochondrial fission regulator 1-like OS=Homo sapiens GN=MTFR1L	3	-0.21909	22.4961	WT_GBA - CT	0.00081342	0.00896323	FALSE	no hit	6.25454
R3HCC1L	A0A087X0M0|Q7Z5L2|Q7Z5L2-2	Coiled-coil domain-containing protein R3HCC1L OS=Homo sapiens GN=R3HCC1L PE=1 SV=1|Coiled-coil domain-containing protein R3HCC1L OS=Homo sapiens GN=R3HCC1L PE=1 SV=2|Isoform 2 of Coiled-coil domain-containing protein R3HCC1L OS=Homo sapiens GN=R3HCC1L	3	0.426418	22.561	WT_GBA - CT	0.000814811	0.00896323	FALSE	no hit	6.139
NDUFS5	O43920	NADH dehydrogenase [ubiquinone] iron-sulfur protein 5 OS=Homo sapiens GN=NDUFS5 PE=1 SV=3	3	0.476218	23.2279	WT_GBA - CT	0.000815768	0.00896323	FALSE	no hit	6.50311
ZC2HC1A	Q96GY0	Zinc finger C2HC domain-containing protein 1A OS=Homo sapiens GN=ZC2HC1A PE=1 SV=2	6	-0.2773	23.8383	WT_GBA - CT	0.000829419	0.00909694	FALSE	no hit	6.56799
RBP1	A0A0A0MQT0|A0A0A0MTB9|H0YAK8|P09455|P09455-2|P09455-3	Retinol binding protein 1, cellular OS=Homo sapiens GN=RBP1 PE=1 SV=1|Retinol-binding protein 1 OS=Homo sapiens GN=RBP1 PE=1 SV=1|Retinol-binding protein 1 OS=Homo sapiens GN=RBP1 PE=1 SV=2|Retinol-binding protein 1 OS=Homo sapiens GN=RBP1 PE=1 SV=2|Isoform 2 of Retinol-binding protein 1 OS=Homo sapiens GN=RBP1|Isoform 3 of Retinol-binding protein 1 OS=Homo sapiens GN=RBP1	4	-0.282024	23.2048	WT_GBA - CT	0.000832609	0.00910503	FALSE	no hit	6.48278
UQCRB	B7Z2R2|P14927|P14927-2	Cytochrome b-c1 complex subunit 7 OS=Homo sapiens GN=UQCRB PE=1 SV=1|Cytochrome b-c1 complex subunit 7 OS=Homo sapiens GN=UQCRB PE=1 SV=2|Isoform 2 of Cytochrome b-c1 complex subunit 7 OS=Homo sapiens GN=UQCRB	6	-0.521826	24.7207	WT_GBA - CT	0.000833318	0.00910503	FALSE	no hit	7.41679
PLOD3	O60568	Procollagen-lysine,2-oxoglutarate 5-dioxygenase 3 OS=Homo sapiens GN=PLOD3 PE=1 SV=1	14	0.320955	25.3145	WT_GBA - CT	0.000834603	0.00910503	FALSE	no hit	6.94173
RAD21	O60216	Double-strand-break repair protein rad21 homolog OS=Homo sapiens GN=RAD21 PE=1 SV=2	12	-0.254847	25.0766	WT_GBA - CT	0.000837633	0.00912188	FALSE	no hit	7.10705
CDKN2C	P42773	Cyclin-dependent kinase 4 inhibitor C OS=Homo sapiens GN=CDKN2C PE=1 SV=1	2	-0.518625	21.8874	WT_GBA - CT	0.00084471	0.00916591	FALSE	no hit	6.39931
YWHAH	Q04917	14-3-3 protein eta OS=Homo sapiens GN=YWHAH PE=1 SV=4	10	-0.201329	27.1485	WT_GBA - CT	0.00084606	0.00916591	FALSE	no hit	7.89385
DAP3	P51398	28S ribosomal protein S29, mitochondrial OS=Homo sapiens GN=DAP3 PE=1 SV=1	11	0.303089	25.1019	WT_GBA - CT	0.000846153	0.00916591	FALSE	no hit	7.1696
KLC1	G3V5R9|Q07866-3|Q07866-6	Kinesin light chain 1 OS=Homo sapiens GN=KLC1 PE=1 SV=1|Isoform G of Kinesin light chain 1 OS=Homo sapiens GN=KLC1|Isoform N of Kinesin light chain 1 OS=Homo sapiens GN=KLC1	20	-0.223395	26.5671	WT_GBA - CT	0.000851477	0.00920734	FALSE	no hit	7.44086
ZCCHC8	Q6NZY4	Zinc finger CCHC domain-containing protein 8 OS=Homo sapiens GN=ZCCHC8 PE=1 SV=2	16	0.228651	25.7535	WT_GBA - CT	0.000859265	0.00927523	FALSE	no hit	7.12914
SLFN11	Q7Z7L1	Schlafen family member 11 OS=Homo sapiens GN=SLFN11 PE=1 SV=2	18	0.359439	25.7422	WT_GBA - CT	0.000863371	0.00929311	FALSE	no hit	7.31662
DNAJC2	Q99543	DnaJ homolog subfamily C member 2 OS=Homo sapiens GN=DNAJC2 PE=1 SV=4	25	0.247708	27.024	WT_GBA - CT	0.000863948	0.00929311	FALSE	no hit	7.59631
RSBN1L	Q6PCB5	Round spermatid basic protein 1-like protein OS=Homo sapiens GN=RSBN1L PE=1 SV=2	16	0.260879	25.6166	WT_GBA - CT	0.000866419	0.00930341	FALSE	no hit	6.94545
CLCC1	Q96S66	Chloride channel CLIC-like protein 1 OS=Homo sapiens GN=CLCC1 PE=1 SV=1	13	0.202953	26.1153	WT_GBA - CT	0.000870591	0.00931749	FALSE	no hit	7.42253
C16ORF58	H3BSM7|Q96GQ5	RUS1 family protein C16orf58 OS=Homo sapiens GN=C16orf58 PE=1 SV=1|RUS1 family protein C16orf58 OS=Homo sapiens GN=C16orf58 PE=1 SV=2	3	0.269186	22.8656	WT_GBA - CT	0.000870765	0.00931749	FALSE	no hit	6.01383
C2CD5	Q86YS7|Q86YS7-3	C2 domain-containing protein 5 OS=Homo sapiens GN=C2CD5 PE=1 SV=1|Isoform 3 of C2 domain-containing protein 5 OS=Homo sapiens GN=C2CD5	7	-0.27564	24.5568	WT_GBA - CT	0.000873796	0.00933366	FALSE	no hit	7.00162
FABP5	Q01469	Fatty acid-binding protein, epidermal OS=Homo sapiens GN=FABP5 PE=1 SV=3	11	-0.321132	26.363	WT_GBA - CT	0.000878964	0.00937256	FALSE	no hit	7.94146
MFN2	O95140	Mitofusin-2 OS=Homo sapiens GN=MFN2 PE=1 SV=3	13	0.225334	25.1474	WT_GBA - CT	0.000884656	0.00941691	FALSE	no hit	6.66428
MAPK1	P28482	Mitogen-activated protein kinase 1 OS=Homo sapiens GN=MAPK1 PE=1 SV=3	12	-0.257798	25.5949	WT_GBA - CT	0.000890427	0.00946194	FALSE	no hit	7.70425
TMEM109	Q9BVC6	Transmembrane protein 109 OS=Homo sapiens GN=TMEM109 PE=1 SV=1	4	-0.237916	24.2849	WT_GBA - CT	0.000893869	0.00947922	FALSE	no hit	7.75801
SLC39A7	A0A087WTX2|A2AAT0|Q92504	Zinc transporter SLC39A7 OS=Homo sapiens GN=SLC39A7 PE=1 SV=1|Zinc transporter SLC39A7 (Fragment) OS=Homo sapiens GN=SLC39A7 PE=1 SV=1|Zinc transporter SLC39A7 OS=Homo sapiens GN=SLC39A7 PE=1 SV=2	3	0.331061	23.2566	WT_GBA - CT	0.000896312	0.00947922	FALSE	no hit	6.82562
CHAMP1	Q96JM3	Chromosome alignment-maintaining phosphoprotein 1 OS=Homo sapiens GN=CHAMP1 PE=1 SV=2	8	-0.340001	24.5069	WT_GBA - CT	0.000896683	0.00947922	FALSE	no hit	6.71158
MED18	Q9BUE0	Mediator of RNA polymerase II transcription subunit 18 OS=Homo sapiens GN=MED18 PE=1 SV=1	4	0.262805	24.6509	WT_GBA - CT	0.000903692	0.00953497	FALSE	no hit	7.08018
NAA16	Q6N069	N-alpha-acetyltransferase 16, NatA auxiliary subunit OS=Homo sapiens GN=NAA16 PE=1 SV=2	12	-0.19708	25.8296	WT_GBA - CT	0.000905062	0.00953497	FALSE	no hit	6.84699
B2M	P61769	Beta-2-microglobulin OS=Homo sapiens GN=B2M PE=1 SV=1	4	-0.419281	24.4214	WT_GBA - CT	0.000910713	0.00957808	FALSE	no hit	7.32385
HLA	E9PIB1|P01889|P04439|P10321|P16188|P30499|P30510|Q5SRN5|Q5SRN7|Q5Y7D6|Q8MH48|Q95604	HLA class I histocompatibility antigen, A-3 alpha chain OS=Homo sapiens GN=HLA-A PE=1 SV=2|HLA class I histocompatibility antigen, A-30 alpha chain OS=Homo sapiens GN=HLA-A PE=1 SV=2|HLA class I histocompatibility antigen, alpha chain G OS=Homo sapiens GN=HLA-G PE=1 SV=1|HLA class I histocompatibility antigen, B-7 alpha chain OS=Homo sapiens GN=HLA-B PE=1 SV=3|HLA class I histocompatibility antig…	32	-0.24257	26.6986	WT_GBA - CT	0.000914321	0.00959959	FALSE	no hit	7.62734
ERP44	Q9BS26	Endoplasmic reticulum resident protein 44 OS=Homo sapiens GN=ERP44 PE=1 SV=1	16	0.201751	26.3976	WT_GBA - CT	0.000923845	0.00968303	FALSE	no hit	7.83248
PWP1	Q13610	Periodic tryptophan protein 1 homolog OS=Homo sapiens GN=PWP1 PE=1 SV=1	9	0.376234	25.366	WT_GBA - CT	0.000926471	0.00969401	FALSE	no hit	7.60232
EEFSEC	P57772	Selenocysteine-specific elongation factor OS=Homo sapiens GN=EEFSEC PE=1 SV=4	9	-0.281498	25.1927	WT_GBA - CT	0.000938369	0.00980181	FALSE	no hit	6.80477
LRWD1	Q9UFC0	Leucine-rich repeat and WD repeat-containing protein 1 OS=Homo sapiens GN=LRWD1 PE=1 SV=2	9	0.198768	24.7333	WT_GBA - CT	0.000945633	0.00986091	FALSE	no hit	7.11535
PDCD2	F5H4V9|Q16342|Q16342-3	Programmed cell death protein 2 OS=Homo sapiens GN=PDCD2 PE=1 SV=1|Programmed cell death protein 2 OS=Homo sapiens GN=PDCD2 PE=1 SV=2|Isoform 3 of Programmed cell death protein 2 OS=Homo sapiens GN=PDCD2	4	0.265274	22.7535	WT_GBA - CT	0.000947712	0.00986329	FALSE	no hit	6.44178
EIF2B3	Q9NR50	Translation initiation factor eIF-2B subunit gamma OS=Homo sapiens GN=EIF2B3 PE=1 SV=1	16	0.231049	26.2999	WT_GBA - CT	0.000949073	0.00986329	FALSE	no hit	7.21304
GPATCH2	Q9NW75|Q9NW75-2	G patch domain-containing protein 2 OS=Homo sapiens GN=GPATCH2 PE=1 SV=1|Isoform 2 of G patch domain-containing protein 2 OS=Homo sapiens GN=GPATCH2	2	-0.338982	21.3253	WT_GBA - CT	0.000952204	0.00986641	FALSE	no hit	5.58718
WDFY1	Q8IWB7	WD repeat and FYVE domain-containing protein 1 OS=Homo sapiens GN=WDFY1 PE=1 SV=1	4	0.341893	23.1611	WT_GBA - CT	0.000952586	0.00986641	FALSE	no hit	6.6385
EIF2AK2	P19525	Interferon-induced, double-stranded RNA-activated protein kinase OS=Homo sapiens GN=EIF2AK2 PE=1 SV=2	12	-0.241627	25.3357	WT_GBA - CT	0.000954717	0.00987183	FALSE	no hit	7.25042
OPA1	O60313-2	Isoform 2 of Dynamin-like 120 kDa protein, mitochondrial OS=Homo sapiens GN=OPA1	32	-0.238936	27.1911	WT_GBA - CT	0.000961929	0.0099297	FALSE	no hit	7.21183
SLC25A1	P53007	Tricarboxylate transport protein, mitochondrial OS=Homo sapiens GN=SLC25A1 PE=1 SV=2	5	-0.505676	23.7639	WT_GBA - CT	0.000966719	0.00994548	FALSE	no hit	7.05263
RPS6KA1	E9PGT3|Q15418|Q15418-2|Q15418-4	Ribosomal protein S6 kinase OS=Homo sapiens GN=RPS6KA1 PE=1 SV=1|Ribosomal protein S6 kinase alpha-1 OS=Homo sapiens GN=RPS6KA1 PE=1 SV=2|Isoform 2 of Ribosomal protein S6 kinase alpha-1 OS=Homo sapiens GN=RPS6KA1|Isoform 4 of Ribosomal protein S6 kinase alpha-1 OS=Homo sapiens GN=RPS6KA1	8	-0.295428	24.2958	WT_GBA - CT	0.000966997	0.00994548	FALSE	no hit	6.52625
ZHX3	Q9H4I2	Zinc fingers and homeoboxes protein 3 OS=Homo sapiens GN=ZHX3 PE=1 SV=3	4	-0.298421	21.7651	WT_GBA - CT	0.000968316	0.00994548	FALSE	no hit	6.02212
SPCS1	Q9Y6A9	Signal peptidase complex subunit 1 OS=Homo sapiens GN=SPCS1 PE=1 SV=4	3	0.40362	23.8552	WT_GBA - CT	0.000975468	0.0100022	FALSE	no hit	6.72232
MICAL3	Q7RTP6	Protein-methionine sulfoxide oxidase MICAL3 OS=Homo sapiens GN=MICAL3 PE=1 SV=2	8	-0.576076	23.6855	WT_GBA - CT	0.000978239	0.0100108	FALSE	no hit	6.12641
MAPRE3	Q9UPY8	Microtubule-associated protein RP/EB family member 3 OS=Homo sapiens GN=MAPRE3 PE=1 SV=1	2	-0.360708	21.8311	WT_GBA - CT	0.000979561	0.0100108	FALSE	no hit	6.32577
MTRR	Q9UBK8|Q9UBK8-2	Methionine synthase reductase OS=Homo sapiens GN=MTRR PE=1 SV=3|Isoform B of Methionine synthase reductase OS=Homo sapiens GN=MTRR	9	-0.208168	24.9483	WT_GBA - CT	0.000981975	0.0100188	FALSE	no hit	6.79664
PCCB	C9JQS9|E7ETT1|E7ETT4|E7EUY3|E7EX59|E9PDR0|E9PEC3|P05166|P05166-2	Propionyl-CoA carboxylase beta chain, mitochondrial OS=Homo sapiens GN=PCCB PE=1 SV=1|Propionyl-CoA carboxylase beta chain, mitochondrial OS=Homo sapiens GN=PCCB PE=1 SV=1|Propionyl-CoA carboxylase beta chain, mitochondrial OS=Homo sapiens GN=PCCB PE=1 SV=1|Propionyl-CoA carboxylase beta chain, mitochondrial OS=Homo sapiens GN=PCCB PE=1 SV=1|Propionyl-CoA carboxylase beta chain, mitochondrial OS=…	7	-0.443941	23.8646	WT_GBA - CT	0.000987335	0.0100402	FALSE	no hit	6.34536
PPP1R21	Q6ZMI0	Protein phosphatase 1 regulatory subunit 21 OS=Homo sapiens GN=PPP1R21 PE=1 SV=1	7	-0.251984	23.3982	WT_GBA - CT	0.000987348	0.0100402	FALSE	no hit	6.21519
ATG2A	H7C3T2|Q2TAZ0|Q2TAZ0-3	Autophagy-related protein 2 homolog A (Fragment) OS=Homo sapiens GN=ATG2A PE=1 SV=1|Autophagy-related protein 2 homolog A OS=Homo sapiens GN=ATG2A PE=1 SV=3|Isoform 2 of Autophagy-related protein 2 homolog A OS=Homo sapiens GN=ATG2A	3	-0.289731	22.0596	WT_GBA - CT	0.000988996	0.0100403	FALSE	no hit	6.02265
SRCAP	Q6ZRS2|Q6ZRS2-2	Helicase SRCAP OS=Homo sapiens GN=SRCAP PE=1 SV=3|Isoform 2 of Helicase SRCAP OS=Homo sapiens GN=SRCAP	17	0.20103	25.2842	WT_GBA - CT	0.00100136	0.0101491	FALSE	no hit	6.53567
SRPRB	Q9Y5M8	Signal recognition particle receptor subunit beta OS=Homo sapiens GN=SRPRB PE=1 SV=3	11	0.293899	26.0936	WT_GBA - CT	0.0010176	0.010275	FALSE	no hit	7.62598
VPS13D	Q5THJ4|Q5THJ4-2	Vacuolar protein sorting-associated protein 13D OS=Homo sapiens GN=VPS13D PE=1 SV=2|Isoform 2 of Vacuolar protein sorting-associated protein 13D OS=Homo sapiens GN=VPS13D	3	0.428215	21.8337	WT_GBA - CT	0.00101844	0.010275	FALSE	no hit	5.75448
GCLC	P48506	Glutamate--cysteine ligase catalytic subunit OS=Homo sapiens GN=GCLC PE=1 SV=2	15	0.233941	25.6296	WT_GBA - CT	0.00101906	0.010275	FALSE	no hit	7.03971
OTULIN	Q96BN8	Ubiquitin thioesterase otulin OS=Homo sapiens GN=OTULIN PE=1 SV=3	9	-0.232048	25.0118	WT_GBA - CT	0.00102047	0.010275	FALSE	no hit	7.16256
LSG1	Q9H089	Large subunit GTPase 1 homolog OS=Homo sapiens GN=LSG1 PE=1 SV=2	12	0.279273	25.402	WT_GBA - CT	0.00102757	0.0103295	FALSE	no hit	6.96592
CKAP4	Q07065	Cytoskeleton-associated protein 4 OS=Homo sapiens GN=CKAP4 PE=1 SV=2	38	0.250774	28.0348	WT_GBA - CT	0.00102968	0.0103339	FALSE	no hit	8.0274
GTF2A2	P52657	Transcription initiation factor IIA subunit 2 OS=Homo sapiens GN=GTF2A2 PE=1 SV=1	2	-0.275366	23.5104	WT_GBA - CT	0.00103145	0.0103347	FALSE	no hit	6.99965
HEXIM1	O94992	Protein HEXIM1 OS=Homo sapiens GN=HEXIM1 PE=1 SV=1	12	-0.349643	25.7966	WT_GBA - CT	0.00104009	0.0104042	FALSE	no hit	7.43701
NUP153	P49790	Nuclear pore complex protein Nup153 OS=Homo sapiens GN=NUP153 PE=1 SV=2	34	0.266391	27.2308	WT_GBA - CT	0.00104392	0.0104256	FALSE	no hit	7.43122
STUB1	Q9UNE7	E3 ubiquitin-protein ligase CHIP OS=Homo sapiens GN=STUB1 PE=1 SV=2	20	-0.35448	26.5957	WT_GBA - CT	0.00105468	0.0105041	FALSE	no hit	7.74626
KCT2	Q8NC54	Keratinocyte-associated transmembrane protein 2 OS=Homo sapiens GN=KCT2 PE=1 SV=2	2	0.328143	23.1407	WT_GBA - CT	0.0010552	0.0105041	FALSE	no hit	6.54106
SLC27A3	Q5K4L6|X6R3N0	Long-chain fatty acid transport protein 3 OS=Homo sapiens GN=SLC27A3 PE=2 SV=3|Long-chain fatty acid transport protein 3 OS=Homo sapiens GN=SLC27A3 PE=1 SV=1	3	-0.256723	22.5935	WT_GBA - CT	0.00106953	0.0106295	FALSE	no hit	6.22376
SELENBP1	Q13228-4	Isoform 4 of Selenium-binding protein 1 OS=Homo sapiens GN=SELENBP1	8	-0.519038	24.0532	WT_GBA - CT	0.00107241	0.010641	FALSE	no hit	6.35515
C15ORF38|ARPIN	A0A0A6YYH1|Q7Z6K5-2	Protein C15orf38-AP3S2 OS=Homo sapiens GN=C15orf38-AP3S2 PE=4 SV=1|Isoform C15orf38-AP3S2 of Arpin OS=Homo sapiens GN=ARPIN	9	-0.390961	25.116	WT_GBA - CT	0.0010751	0.0106505	FALSE	no hit	7.2502
CAMK1	Q14012	Calcium/calmodulin-dependent protein kinase type 1 OS=Homo sapiens GN=CAMK1 PE=1 SV=1	10	-0.319947	24.628	WT_GBA - CT	0.00107741	0.0106561	FALSE	no hit	6.98551
MMACHC	A0A0C4DGU2|Q9Y4U1	Methylmalonic aciduria and homocystinuria type C protein OS=Homo sapiens GN=MMACHC PE=1 SV=1|Methylmalonic aciduria and homocystinuria type C protein OS=Homo sapiens GN=MMACHC PE=1 SV=3	4	0.298719	23.0253	WT_GBA - CT	0.00107977	0.0106623	FALSE	no hit	6.37567
WASF3	Q9UPY6-2	Isoform 2 of Wiskott-Aldrich syndrome protein family member 3 OS=Homo sapiens GN=WASF3	2	-0.320406	21.666	WT_GBA - CT	0.00109612	0.0108064	FALSE	no hit	5.9928
POP4	K7EQV2|O95707	Ribonuclease P protein subunit p29 (Fragment) OS=Homo sapiens GN=POP4 PE=1 SV=1|Ribonuclease P protein subunit p29 OS=Homo sapiens GN=POP4 PE=1 SV=2	2	0.33817	22.9499	WT_GBA - CT	0.0010986	0.0108134	FALSE	no hit	6.88299
GGA3	Q9NZ52	ADP-ribosylation factor-binding protein GGA3 OS=Homo sapiens GN=GGA3 PE=1 SV=1	10	-0.196136	25.0457	WT_GBA - CT	0.00111347	0.0109248	FALSE	no hit	6.74054
ETFB	P38117-2	Isoform 2 of Electron transfer flavoprotein subunit beta OS=Homo sapiens GN=ETFB	12	-0.220934	26.005	WT_GBA - CT	0.00111356	0.0109248	FALSE	no hit	7.81337
ABAT	H3BNQ7|H3BRN4|P80404	4-aminobutyrate aminotransferase, mitochondrial OS=Homo sapiens GN=ABAT PE=1 SV=1|4-aminobutyrate aminotransferase, mitochondrial OS=Homo sapiens GN=ABAT PE=1 SV=1|4-aminobutyrate aminotransferase, mitochondrial OS=Homo sapiens GN=ABAT PE=1 SV=3	2	-0.530245	23.2801	WT_GBA - CT	0.00111525	0.0109248	FALSE	no hit	6.54453
TPM4	P67936|P67936-2	Tropomyosin alpha-4 chain OS=Homo sapiens GN=TPM4 PE=1 SV=3|Isoform 2 of Tropomyosin alpha-4 chain OS=Homo sapiens GN=TPM4	14	-0.380969	26.876	WT_GBA - CT	0.00112518	0.0109882	FALSE	no hit	7.96247
TWF1	Q12792	Twinfilin-1 OS=Homo sapiens GN=TWF1 PE=1 SV=3	9	-0.256056	25.3192	WT_GBA - CT	0.00112621	0.0109882	FALSE	no hit	7.54777
PJA2	O43164|O43164-2	E3 ubiquitin-protein ligase Praja-2 OS=Homo sapiens GN=PJA2 PE=1 SV=4|Isoform 2 of E3 ubiquitin-protein ligase Praja-2 OS=Homo sapiens GN=PJA2	3	0.326286	21.636	WT_GBA - CT	0.00112709	0.0109882	FALSE	no hit	5.67108
COTL1	Q14019	Coactosin-like protein OS=Homo sapiens GN=COTL1 PE=1 SV=3	8	-0.346383	25.6171	WT_GBA - CT	0.00112978	0.010997	FALSE	no hit	7.63851
GPN3	Q9UHW5|Q9UHW5-2	GPN-loop GTPase 3 OS=Homo sapiens GN=GPN3 PE=1 SV=2|Isoform 2 of GPN-loop GTPase 3 OS=Homo sapiens GN=GPN3	3	0.237761	23.5218	WT_GBA - CT	0.00113289	0.0110098	FALSE	no hit	6.33723
ING3	E7ET07|Q9NXR8	Inhibitor of growth protein OS=Homo sapiens GN=ING3 PE=1 SV=1|Inhibitor of growth protein 3 OS=Homo sapiens GN=ING3 PE=1 SV=2	5	0.219913	23.7989	WT_GBA - CT	0.00114306	0.0110717	FALSE	no hit	6.41977
INPP5F	Q9Y2H2	Phosphatidylinositide phosphatase SAC2 OS=Homo sapiens GN=INPP5F PE=1 SV=3	4	-0.270649	24.4411	WT_GBA - CT	0.00114447	0.0110717	FALSE	no hit	6.37438
HDGFRP2	Q7Z4V5|Q7Z4V5-2	Hepatoma-derived growth factor-related protein 2 OS=Homo sapiens GN=HDGFRP2 PE=1 SV=1|Isoform 2 of Hepatoma-derived growth factor-related protein 2 OS=Homo sapiens GN=HDGFRP2	14	-0.214062	26.4232	WT_GBA - CT	0.00114467	0.0110717	FALSE	no hit	7.66277
SGPL1	O95470	Sphingosine-1-phosphate lyase 1 OS=Homo sapiens GN=SGPL1 PE=1 SV=3	8	-0.281358	24.9968	WT_GBA - CT	0.00114761	0.0110827	FALSE	no hit	6.87143
NOL7	Q9UMY1	Nucleolar protein 7 OS=Homo sapiens GN=NOL7 PE=1 SV=2	7	0.254917	24.7582	WT_GBA - CT	0.00116982	0.0112795	FALSE	no hit	6.98026
ACAD9	Q9H845	Acyl-CoA dehydrogenase family member 9, mitochondrial OS=Homo sapiens GN=ACAD9 PE=1 SV=1	10	-0.306308	25.6296	WT_GBA - CT	0.00117412	0.0113032	FALSE	no hit	6.98263
RAB11FIP1	Q6WKZ4	Rab11 family-interacting protein 1 OS=Homo sapiens GN=RAB11FIP1 PE=1 SV=3	13	-0.220965	25.365	WT_GBA - CT	0.00117924	0.0113252	FALSE	no hit	6.86271
ARF4	P18085	ADP-ribosylation factor 4 OS=Homo sapiens GN=ARF4 PE=1 SV=3	5	0.254356	25.4912	WT_GBA - CT	0.00118009	0.0113252	FALSE	no hit	7.43548
BECN1	Q14457	Beclin-1 OS=Homo sapiens GN=BECN1 PE=1 SV=2	7	-0.193242	24.7202	WT_GBA - CT	0.0011863	0.011367	FALSE	no hit	6.65247
THEM6	Q8WUY1	Protein THEM6 OS=Homo sapiens GN=THEM6 PE=1 SV=2	7	-0.220514	24.613	WT_GBA - CT	0.00119554	0.0114377	FALSE	no hit	7.00646
SHCBP1	Q8NEM2	SHC SH2 domain-binding protein 1 OS=Homo sapiens GN=SHCBP1 PE=1 SV=3	5	-0.374608	23.0412	WT_GBA - CT	0.00120382	0.011499	FALSE	no hit	6.34607
UBXN7	O94888	UBX domain-containing protein 7 OS=Homo sapiens GN=UBXN7 PE=1 SV=2	13	-0.260383	25.4157	WT_GBA - CT	0.00120664	0.011508	FALSE	no hit	7.35634
GCC1	Q96CN9	GRIP and coiled-coil domain-containing protein 1 OS=Homo sapiens GN=GCC1 PE=1 SV=1	11	0.281669	25.02	WT_GBA - CT	0.00121367	0.0115572	FALSE	no hit	6.66107
SC5D	O75845	Lathosterol oxidase OS=Homo sapiens GN=SC5D PE=1 SV=2	3	0.626574	23.7625	WT_GBA - CT	0.00122127	0.0116044	FALSE	candidate	6.22157
PPP2R4	A6PVN5|Q15257-2|Q15257-3	Serine/threonine-protein phosphatase 2A activator OS=Homo sapiens GN=PPP2R4 PE=1 SV=1|Isoform 1 of Serine/threonine-protein phosphatase 2A activator OS=Homo sapiens GN=PPP2R4|Isoform 3 of Serine/threonine-protein phosphatase 2A activator OS=Homo sapiens GN=PPP2R4	6	-0.244854	24.9659	WT_GBA - CT	0.00122241	0.0116044	FALSE	no hit	7.49097
CEP41	Q9BYV8	Centrosomal protein of 41 kDa OS=Homo sapiens GN=CEP41 PE=1 SV=1	7	0.284717	24.6008	WT_GBA - CT	0.00122859	0.011645	FALSE	no hit	6.83564
RNF123	Q5XPI4	E3 ubiquitin-protein ligase RNF123 OS=Homo sapiens GN=RNF123 PE=1 SV=1	2	-0.296217	22.3916	WT_GBA - CT	0.00124519	0.0117842	FALSE	no hit	6.42534
PSIP1	O75475	PC4 and SFRS1-interacting protein OS=Homo sapiens GN=PSIP1 PE=1 SV=1	19	-0.205666	26.6437	WT_GBA - CT	0.00124855	0.0117978	FALSE	no hit	7.45535
ARF5	P84085	ADP-ribosylation factor 5 OS=Homo sapiens GN=ARF5 PE=1 SV=2	4	0.223364	25.7581	WT_GBA - CT	0.0012549	0.0118396	FALSE	no hit	7.74117
DAPK3	O43293	Death-associated protein kinase 3 OS=Homo sapiens GN=DAPK3 PE=1 SV=1	5	-0.217025	24.1215	WT_GBA - CT	0.001272	0.0119825	FALSE	no hit	6.56258
DNAJC25	Q9H1X3|Q9H1X3-3	DnaJ homolog subfamily C member 25 OS=Homo sapiens GN=DNAJC25 PE=1 SV=1|Isoform 3 of DnaJ homolog subfamily C member 25 OS=Homo sapiens GN=DNAJC25	5	0.234408	23.6561	WT_GBA - CT	0.00127607	0.0119986	FALSE	no hit	6.37837
B4GAT1	O43505	Beta-1,4-glucuronyltransferase 1 OS=Homo sapiens GN=B4GAT1 PE=1 SV=1	6	-0.266734	24.4896	WT_GBA - CT	0.00127761	0.0119986	FALSE	no hit	6.96217
NMT2	O60551|Q5VUC6	Glycylpeptide N-tetradecanoyltransferase 2 OS=Homo sapiens GN=NMT2 PE=1 SV=1|Glycylpeptide N-tetradecanoyltransferase OS=Homo sapiens GN=NMT2 PE=1 SV=1	6	-0.234619	24.4758	WT_GBA - CT	0.00128557	0.0120505	FALSE	no hit	7.09258
PPA2	A0A0C4DGB9|Q9H2U2	Inorganic pyrophosphatase 2, mitochondrial OS=Homo sapiens GN=PPA2 PE=1 SV=1|Inorganic pyrophosphatase 2, mitochondrial OS=Homo sapiens GN=PPA2 PE=1 SV=2	12	-0.205049	25.0891	WT_GBA - CT	0.00128706	0.0120505	FALSE	no hit	7.36544
FAM120A	Q9NZB2|Q9NZB2-6	Constitutive coactivator of PPAR-gamma-like protein 1 OS=Homo sapiens GN=FAM120A PE=1 SV=2|Isoform F of Constitutive coactivator of PPAR-gamma-like protein 1 OS=Homo sapiens GN=FAM120A	22	-0.220609	25.9044	WT_GBA - CT	0.00128908	0.0120511	FALSE	no hit	6.91405
RNF10	Q8N5U6|Q8N5U6-2	RING finger protein 10 OS=Homo sapiens GN=RNF10 PE=1 SV=2|Isoform 2 of RING finger protein 10 OS=Homo sapiens GN=RNF10	3	-0.46371	22.5885	WT_GBA - CT	0.00130227	0.0121559	FALSE	no hit	5.96907
ALKBH4	Q9NXW9	Alpha-ketoglutarate-dependent dioxygenase alkB homolog 4 OS=Homo sapiens GN=ALKBH4 PE=1 SV=1	6	0.307668	24.086	WT_GBA - CT	0.00130998	0.0122092	FALSE	no hit	7.13907
ABI2	A0A0C4DG21|B7Z836|E7EP65|E7EW77|F8WAL6|Q9NYB9|Q9NYB9-2|Q9NYB9-4	Abl interactor 2 OS=Homo sapiens GN=ABI2 PE=1 SV=1|Abl interactor 2 OS=Homo sapiens GN=ABI2 PE=1 SV=1|Abl interactor 2 (Fragment) OS=Homo sapiens GN=ABI2 PE=1 SV=1|Abl interactor 2 OS=Homo sapiens GN=ABI2 PE=1 SV=1|Abl interactor 2 OS=Homo sapiens GN=ABI2 PE=1 SV=2|Abl interactor 2 OS=Homo sapiens GN=ABI2 PE=1 SV=1|Isoform 2 of Abl interactor 2 OS=Homo sapiens GN=ABI2|Isoform 4 of Abl interactor …	3	-0.255781	22.8116	WT_GBA - CT	0.00132558	0.0123139	FALSE	no hit	6.51685
TMEM163	Q8TC26	Transmembrane protein 163 OS=Homo sapiens GN=TMEM163 PE=2 SV=1	3	0.239265	22.5833	WT_GBA - CT	0.00132561	0.0123139	FALSE	no hit	6.50985
IMMT	Q16891-2|Q16891-4	Isoform 2 of MICOS complex subunit MIC60 OS=Homo sapiens GN=IMMT|Isoform 4 of MICOS complex subunit MIC60 OS=Homo sapiens GN=IMMT	33	-0.464532	27.2106	WT_GBA - CT	0.00132808	0.0123139	FALSE	no hit	7.52117
PPP2R5D	E9PFR3|Q14738	Serine/threonine-protein phosphatase 2A 56 kDa regulatory subunit delta isoform OS=Homo sapiens GN=PPP2R5D PE=1 SV=1|Serine/threonine-protein phosphatase 2A 56 kDa regulatory subunit delta isoform OS=Homo sapiens GN=PPP2R5D PE=1 SV=1	16	0.215004	26.1166	WT_GBA - CT	0.0013298	0.0123139	FALSE	no hit	7.42446
PDE4DIP	A0A0A0MRM1|E9PL24|E9PQG4	Myomegalin OS=Homo sapiens GN=PDE4DIP PE=1 SV=1|Myomegalin OS=Homo sapiens GN=PDE4DIP PE=1 SV=2|Myomegalin OS=Homo sapiens GN=PDE4DIP PE=1 SV=2	17	0.208081	25.695	WT_GBA - CT	0.00133123	0.0123139	FALSE	no hit	6.51405
FAM160B2	Q86V87	Protein FAM160B2 OS=Homo sapiens GN=FAM160B2 PE=2 SV=2	2	-0.354378	21.9571	WT_GBA - CT	0.00133974	0.012374	FALSE	no hit	5.74312
MARVELD2	A0A0G2JQ38|A1BQX2|Q8N4S9|Q8N4S9-3	MARVEL domain-containing protein 2 OS=Homo sapiens GN=MARVELD2 PE=1 SV=1|MARVEL domain-containing protein 2 OS=Homo sapiens GN=MARVELD2 PE=1 SV=1|MARVEL domain-containing protein 2 OS=Homo sapiens GN=MARVELD2 PE=1 SV=2|Isoform 3 of MARVEL domain-containing protein 2 OS=Homo sapiens GN=MARVELD2	2	-0.422194	21.623	WT_GBA - CT	0.00134288	0.0123843	FALSE	no hit	6.03091
AKAP17A	Q02040	A-kinase anchor protein 17A OS=Homo sapiens GN=AKAP17A PE=1 SV=2	7	0.31914	24.5642	WT_GBA - CT	0.00134916	0.0124236	FALSE	no hit	6.79319
L3MBTL2	Q969R5	Lethal(3)malignant brain tumor-like protein 2 OS=Homo sapiens GN=L3MBTL2 PE=1 SV=1	4	0.286967	22.979	WT_GBA - CT	0.00135373	0.012447	FALSE	no hit	6.29759
SYVN1	Q86TM6|Q86TM6-2|Q86TM6-3	E3 ubiquitin-protein ligase synoviolin OS=Homo sapiens GN=SYVN1 PE=1 SV=2|Isoform 2 of E3 ubiquitin-protein ligase synoviolin OS=Homo sapiens GN=SYVN1|Isoform 3 of E3 ubiquitin-protein ligase synoviolin OS=Homo sapiens GN=SYVN1	3	0.228273	24.0216	WT_GBA - CT	0.00136847	0.0125637	FALSE	no hit	6.4135
NARF	A0A088AWN8|E7EP87|Q9UHQ1|Q9UHQ1-2|Q9UHQ1-3|Q9UHQ1-4	Nuclear prelamin A recognition factor OS=Homo sapiens GN=NARF PE=1 SV=1|Nuclear prelamin A recognition factor OS=Homo sapiens GN=NARF PE=1 SV=2|Nuclear prelamin A recognition factor OS=Homo sapiens GN=NARF PE=1 SV=1|Isoform 2 of Nuclear prelamin A recognition factor OS=Homo sapiens GN=NARF|Isoform 3 of Nuclear prelamin A recognition factor OS=Homo sapiens GN=NARF|Isoform 4 of Nuclear prelamin A r…	4	0.438324	23.1003	WT_GBA - CT	0.00138409	0.0126881	FALSE	no hit	6.39119
TAGLN2	P37802	Transgelin-2 OS=Homo sapiens GN=TAGLN2 PE=1 SV=3	15	-0.323268	27.3843	WT_GBA - CT	0.00139998	0.0128147	FALSE	no hit	8.45463
KIAA1522	Q9P206-2	Isoform 2 of Uncharacterized protein KIAA1522 OS=Homo sapiens GN=KIAA1522	5	-0.24378	23.4382	WT_GBA - CT	0.00140987	0.0128861	FALSE	no hit	6.53314
KLC2	Q9H0B6	Kinesin light chain 2 OS=Homo sapiens GN=KLC2 PE=1 SV=1	19	-0.214896	26.0381	WT_GBA - CT	0.00141404	0.0129048	FALSE	no hit	7.30092
PSME1	Q06323	Proteasome activator complex subunit 1 OS=Homo sapiens GN=PSME1 PE=1 SV=1	15	-0.341468	26.3602	WT_GBA - CT	0.00141613	0.0129048	FALSE	no hit	7.72184
TWSG1	Q9GZX9	Twisted gastrulation protein homolog 1 OS=Homo sapiens GN=TWSG1 PE=1 SV=1	2	-0.393786	22.9072	WT_GBA - CT	0.00142352	0.0129529	FALSE	no hit	6.33283
APP	P05067|P05067-11|P05067-7|P05067-8|P05067-9	Amyloid beta A4 protein OS=Homo sapiens GN=APP PE=1 SV=3|Isoform 11 of Amyloid beta A4 protein OS=Homo sapiens GN=APP|Isoform L-APP733 of Amyloid beta A4 protein OS=Homo sapiens GN=APP|Isoform APP751 of Amyloid beta A4 protein OS=Homo sapiens GN=APP|Isoform L-APP752 of Amyloid beta A4 protein OS=Homo sapiens GN=APP	11	0.24278	25.2125	WT_GBA - CT	0.00143639	0.0130507	FALSE	no hit	6.91188
LIMA1	Q9UHB6|Q9UHB6-4	LIM domain and actin-binding protein 1 OS=Homo sapiens GN=LIMA1 PE=1 SV=1|Isoform 4 of LIM domain and actin-binding protein 1 OS=Homo sapiens GN=LIMA1	25	-0.373025	26.8856	WT_GBA - CT	0.00144697	0.0131274	FALSE	no hit	7.27833
CFL1	P23528	Cofilin-1 OS=Homo sapiens GN=CFL1 PE=1 SV=3	17	-0.277277	27.2062	WT_GBA - CT	0.00144926	0.0131289	FALSE	no hit	8.41375
SRGAP1	Q7Z6B7	SLIT-ROBO Rho GTPase-activating protein 1 OS=Homo sapiens GN=SRGAP1 PE=1 SV=1	2	0.268729	21.1255	WT_GBA - CT	0.00145183	0.0131328	FALSE	no hit	5.7461
MAD2L2	B1AK44|Q9UI95	Mitotic spindle assembly checkpoint protein MAD2B OS=Homo sapiens GN=MAD2L2 PE=1 SV=1|Mitotic spindle assembly checkpoint protein MAD2B OS=Homo sapiens GN=MAD2L2 PE=1 SV=2	2	0.336215	23.4004	WT_GBA - CT	0.00145632	0.0131439	FALSE	no hit	6.83498
PRR3	P79522-2	Isoform 2 of Proline-rich protein 3 OS=Homo sapiens GN=PRR3	2	0.647714	22.0638	WT_GBA - CT	0.00145976	0.0131439	FALSE	candidate	6.05823
HSD17B11	D6RCD0|Q8NBQ5	Estradiol 17-beta-dehydrogenase 11 OS=Homo sapiens GN=HSD17B11 PE=1 SV=2|Estradiol 17-beta-dehydrogenase 11 OS=Homo sapiens GN=HSD17B11 PE=1 SV=3	3	0.291147	22.03	WT_GBA - CT	0.00146004	0.0131439	FALSE	no hit	6.28795
CBLL1	Q75N03	E3 ubiquitin-protein ligase Hakai OS=Homo sapiens GN=CBLL1 PE=1 SV=1	5	0.279174	23.7732	WT_GBA - CT	0.00146162	0.0131439	FALSE	no hit	7.0337
ATRAID	C9JA62|Q6UW56|Q6UW56-2|Q6UW56-3	All-trans retinoic acid-induced differentiation factor (Fragment) OS=Homo sapiens GN=ATRAID PE=1 SV=1|All-trans retinoic acid-induced differentiation factor OS=Homo sapiens GN=ATRAID PE=1 SV=2|Isoform 2 of All-trans retinoic acid-induced differentiation factor OS=Homo sapiens GN=ATRAID|Isoform 3 of All-trans retinoic acid-induced differentiation factor OS=Homo sapiens GN=ATRAID	2	0.273311	23.1981	WT_GBA - CT	0.00147166	0.0132148	FALSE	no hit	6.8221
EPM2AIP1	Q7L775	EPM2A-interacting protein 1 OS=Homo sapiens GN=EPM2AIP1 PE=1 SV=1	4	-0.289595	24.0997	WT_GBA - CT	0.00147744	0.0132453	FALSE	no hit	6.40667
LYPLA1	A0A087X1K9|O75608|O75608-2	Acyl-protein thioesterase 1 OS=Homo sapiens GN=LYPLA1 PE=1 SV=1|Acyl-protein thioesterase 1 OS=Homo sapiens GN=LYPLA1 PE=1 SV=1|Isoform 2 of Acyl-protein thioesterase 1 OS=Homo sapiens GN=LYPLA1	5	-0.184189	24.9325	WT_GBA - CT	0.00147937	0.0132453	FALSE	no hit	7.55189
TRAF7	Q6Q0C0|Q6Q0C0-2	E3 ubiquitin-protein ligase TRAF7 OS=Homo sapiens GN=TRAF7 PE=1 SV=1|Isoform 2 of E3 ubiquitin-protein ligase TRAF7 OS=Homo sapiens GN=TRAF7	2	-0.254784	21.6216	WT_GBA - CT	0.00148786	0.0132953	FALSE	no hit	5.89948
CEP104	O60308	Centrosomal protein of 104 kDa OS=Homo sapiens GN=CEP104 PE=1 SV=1	2	0.306045	22.2166	WT_GBA - CT	0.00148928	0.0132953	FALSE	no hit	5.99509
SCPEP1	Q9HB40	Retinoid-inducible serine carboxypeptidase OS=Homo sapiens GN=SCPEP1 PE=1 SV=1	4	-0.234507	24.0214	WT_GBA - CT	0.00149709	0.0133456	FALSE	no hit	6.75834
DPYSL3	Q14195-2	Isoform LCRMP-4 of Dihydropyrimidinase-related protein 3 OS=Homo sapiens GN=DPYSL3	19	-0.21692	26.2421	WT_GBA - CT	0.00150275	0.0133767	FALSE	no hit	7.4374
SCD5	Q86SK9|Q86SK9-2	Stearoyl-CoA desaturase 5 OS=Homo sapiens GN=SCD5 PE=1 SV=2|Isoform 2 of Stearoyl-CoA desaturase 5 OS=Homo sapiens GN=SCD5	2	-0.230534	22.3367	WT_GBA - CT	0.00151063	0.0134273	FALSE	no hit	6.13321
N4BP2	H0YA93|Q86UW6|Q86UW6-2	NEDD4-binding protein 2 (Fragment) OS=Homo sapiens GN=N4BP2 PE=1 SV=1|NEDD4-binding protein 2 OS=Homo sapiens GN=N4BP2 PE=1 SV=2|Isoform 2 of NEDD4-binding protein 2 OS=Homo sapiens GN=N4BP2	5	0.255586	23.278	WT_GBA - CT	0.00153688	0.0136409	FALSE	no hit	6.24077
ATP1A3	A0A0A0MT26|M0R116|P13637|P13637-2|P13637-3	Sodium/potassium-transporting ATPase subunit alpha-3 OS=Homo sapiens GN=ATP1A3 PE=1 SV=1|Sodium/potassium-transporting ATPase subunit alpha OS=Homo sapiens GN=ATP1A3 PE=1 SV=1|Sodium/potassium-transporting ATPase subunit alpha-3 OS=Homo sapiens GN=ATP1A3 PE=1 SV=3|Isoform 2 of Sodium/potassium-transporting ATPase subunit alpha-3 OS=Homo sapiens GN=ATP1A3|Isoform 3 of Sodium/potassium-transporting…	7	0.231464	24.7141	WT_GBA - CT	0.00153988	0.0136478	FALSE	no hit	6.63604
APEH	C9JIF9|P13798	Acylamino-acid-releasing enzyme OS=Homo sapiens GN=APEH PE=1 SV=1|Acylamino-acid-releasing enzyme OS=Homo sapiens GN=APEH PE=1 SV=4	11	-0.281484	25.4037	WT_GBA - CT	0.00155638	0.0137742	FALSE	no hit	7.24618
LIX1L	Q8IVB5	LIX1-like protein OS=Homo sapiens GN=LIX1L PE=2 SV=1	2	0.32501	22.9596	WT_GBA - CT	0.00155891	0.0137767	FALSE	no hit	6.36207
GTF3C2	Q8WUA4	General transcription factor 3C polypeptide 2 OS=Homo sapiens GN=GTF3C2 PE=1 SV=2	8	0.193902	25.3508	WT_GBA - CT	0.00156664	0.0138251	FALSE	no hit	7.1182
DUSP14	O95147|Q6FI36	Dual specificity protein phosphatase 14 OS=Homo sapiens GN=DUSP14 PE=1 SV=1|DUSP14 protein OS=Homo sapiens GN=DUSP14 PE=1 SV=1	2	0.296736	22.3063	WT_GBA - CT	0.00158082	0.0139303	FALSE	no hit	6.0413
ACSF2	E9PF16|Q96CM8|Q96CM8-2|Q96CM8-3	Acyl-CoA synthetase family member 2, mitochondrial OS=Homo sapiens GN=ACSF2 PE=1 SV=1|Acyl-CoA synthetase family member 2, mitochondrial OS=Homo sapiens GN=ACSF2 PE=1 SV=2|Isoform 2 of Acyl-CoA synthetase family member 2, mitochondrial OS=Homo sapiens GN=ACSF2|Isoform 3 of Acyl-CoA synthetase family member 2, mitochondrial OS=Homo sapiens GN=ACSF2	8	-0.377533	24.2125	WT_GBA - CT	0.00158557	0.0139521	FALSE	no hit	6.73373
ERLEC1	Q96DZ1|Q96DZ1-3	Endoplasmic reticulum lectin 1 OS=Homo sapiens GN=ERLEC1 PE=1 SV=1|Isoform 3 of Endoplasmic reticulum lectin 1 OS=Homo sapiens GN=ERLEC1	7	0.262693	24.4527	WT_GBA - CT	0.00158904	0.0139627	FALSE	no hit	6.6735
PHLDB2	E9PFQ4|E9PGF6|Q86SQ0|Q86SQ0-2|Q86SQ0-3	Pleckstrin homology-like domain family B member 2 (Fragment) OS=Homo sapiens GN=PHLDB2 PE=1 SV=1|Pleckstrin homology-like domain family B member 2 OS=Homo sapiens GN=PHLDB2 PE=1 SV=1|Pleckstrin homology-like domain family B member 2 OS=Homo sapiens GN=PHLDB2 PE=1 SV=2|Isoform 2 of Pleckstrin homology-like domain family B member 2 OS=Homo sapiens GN=PHLDB2|Isoform 3 of Pleckstrin homology-like dom…	3	-0.304216	21.8238	WT_GBA - CT	0.00159908	0.0140308	FALSE	no hit	5.78771
MYO1B	E9PDF6|O43795|O43795-2	Unconventional myosin-Ib OS=Homo sapiens GN=MYO1B PE=1 SV=1|Unconventional myosin-Ib OS=Homo sapiens GN=MYO1B PE=1 SV=3|Isoform 2 of Unconventional myosin-Ib OS=Homo sapiens GN=MYO1B	18	-0.208011	26.4668	WT_GBA - CT	0.00161716	0.0141692	FALSE	no hit	7.1834
NDUFA10	A0A087WXC5|E7ESZ7|O95299	NADH dehydrogenase [ubiquinone] 1 alpha subcomplex subunit 10, mitochondrial OS=Homo sapiens GN=NDUFA10 PE=1 SV=1|NADH dehydrogenase [ubiquinone] 1 alpha subcomplex subunit 10, mitochondrial OS=Homo sapiens GN=NDUFA10 PE=1 SV=1|NADH dehydrogenase [ubiquinone] 1 alpha subcomplex subunit 10, mitochondrial OS=Homo sapiens GN=NDUFA10 PE=1 SV=1	8	0.57957	25.0478	WT_GBA - CT	0.00162095	0.0141822	FALSE	no hit	7.54669
SCARB1	B7ZKQ9|Q8WTV0-2|Q8WTV0-4	SCARB1 protein OS=Homo sapiens GN=SCARB1 PE=1 SV=1|Isoform 1 of Scavenger receptor class B member 1 OS=Homo sapiens GN=SCARB1|Isoform 4 of Scavenger receptor class B member 1 OS=Homo sapiens GN=SCARB1	7	0.246428	25.5578	WT_GBA - CT	0.00165029	0.0144183	FALSE	no hit	7.00453
FEN1	P39748	Flap endonuclease 1 OS=Homo sapiens GN=FEN1 PE=1 SV=1	14	-0.190052	26.2356	WT_GBA - CT	0.0016579	0.0144642	FALSE	no hit	7.99908
UPRT	A0A0A0MRR5|Q96BW1|Q96BW1-3	Uncharacterized protein OS=Homo sapiens GN=UPRT PE=1 SV=1|Uracil phosphoribosyltransferase homolog OS=Homo sapiens GN=UPRT PE=1 SV=1|Isoform 3 of Uracil phosphoribosyltransferase homolog OS=Homo sapiens GN=UPRT	4	0.20917	23.7745	WT_GBA - CT	0.00166725	0.0145251	FALSE	no hit	6.55932
MND1	A0A087WTC6|D6R9E3|D6RCT6|Q9BWT6	Meiotic nuclear division protein 1 homolog OS=Homo sapiens GN=MND1 PE=1 SV=1|Meiotic nuclear division protein 1 homolog OS=Homo sapiens GN=MND1 PE=1 SV=1|Meiotic nuclear division protein 1 homolog (Fragment) OS=Homo sapiens GN=MND1 PE=1 SV=1|Meiotic nuclear division protein 1 homolog OS=Homo sapiens GN=MND1 PE=1 SV=1	3	0.235739	22.2181	WT_GBA - CT	0.00167075	0.0145268	FALSE	no hit	5.87602
BAD	Q92934	Bcl2-associated agonist of cell death OS=Homo sapiens GN=BAD PE=1 SV=3	4	-0.600198	23.2733	WT_GBA - CT	0.00167217	0.0145268	FALSE	candidate	6.58593
RILPL1	Q5EBL4	RILP-like protein 1 OS=Homo sapiens GN=RILPL1 PE=1 SV=1	9	-0.660975	24.6598	WT_GBA - CT	0.00167654	0.0145442	FALSE	candidate	6.71654
UBXN8	A0A087WT23|A0A087WV67|O00124|O00124-3	UBX domain-containing protein 8 OS=Homo sapiens GN=UBXN8 PE=1 SV=1|UBX domain-containing protein 8 OS=Homo sapiens GN=UBXN8 PE=1 SV=1|UBX domain-containing protein 8 OS=Homo sapiens GN=UBXN8 PE=1 SV=2|Isoform 3 of UBX domain-containing protein 8 OS=Homo sapiens GN=UBXN8	2	0.698101	23.0933	WT_GBA - CT	0.00169023	0.0146381	FALSE	candidate	6.50224
RRM1	P23921	Ribonucleoside-diphosphate reductase large subunit OS=Homo sapiens GN=RRM1 PE=1 SV=1	27	-0.245805	26.9199	WT_GBA - CT	0.00169303	0.0146381	FALSE	no hit	7.38034
NDUFC2	O95298|O95298-2	NADH dehydrogenase [ubiquinone] 1 subunit C2 OS=Homo sapiens GN=NDUFC2 PE=1 SV=1|Isoform 4 of NADH dehydrogenase [ubiquinone] 1 subunit C2 OS=Homo sapiens GN=NDUFC2	3	0.450846	24.3415	WT_GBA - CT	0.00169452	0.0146381	FALSE	no hit	7.18911
CDO1	Q16878	Cysteine dioxygenase type 1 OS=Homo sapiens GN=CDO1 PE=1 SV=2	2	-0.59181	21.7727	WT_GBA - CT	0.00169755	0.0146438	FALSE	candidate	5.6677
FKBP15	A0A0A0MT60|Q5T1M5	FK506-binding protein 15 (Fragment) OS=Homo sapiens GN=FKBP15 PE=1 SV=1|FK506-binding protein 15 OS=Homo sapiens GN=FKBP15 PE=1 SV=2	15	-0.180116	25.404	WT_GBA - CT	0.0017032	0.0146545	FALSE	no hit	6.71382
DMTN	Q08495|Q08495-2|Q08495-3	Dematin OS=Homo sapiens GN=DMTN PE=1 SV=3|Isoform 2 of Dematin OS=Homo sapiens GN=DMTN|Isoform 3 of Dematin OS=Homo sapiens GN=DMTN	2	-0.341062	21.7314	WT_GBA - CT	0.00170357	0.0146545	FALSE	no hit	5.67152
SYDE1	M0QXZ8|Q6ZW31|Q6ZW31-2	Rho GTPase-activating protein SYDE1 OS=Homo sapiens GN=SYDE1 PE=1 SV=1|Rho GTPase-activating protein SYDE1 OS=Homo sapiens GN=SYDE1 PE=1 SV=1|Isoform 2 of Rho GTPase-activating protein SYDE1 OS=Homo sapiens GN=SYDE1	3	-0.375935	22.3886	WT_GBA - CT	0.0017172	0.0147511	FALSE	no hit	5.72459
ALG5	Q9Y673	Dolichyl-phosphate beta-glucosyltransferase OS=Homo sapiens GN=ALG5 PE=1 SV=1	8	0.243309	24.4232	WT_GBA - CT	0.00172587	0.0148049	FALSE	no hit	7.08631
GNAQ	P50148	Guanine nucleotide-binding protein G(q) subunit alpha OS=Homo sapiens GN=GNAQ PE=1 SV=4	3	-0.196054	23.9691	WT_GBA - CT	0.0017375	0.0148838	FALSE	no hit	6.82102
TRAPPC5	Q8IUR0	Trafficking protein particle complex subunit 5 OS=Homo sapiens GN=TRAPPC5 PE=1 SV=1	6	0.217092	24.5342	WT_GBA - CT	0.00174237	0.0149048	FALSE	no hit	7.09543
LRPAP1	P30533	Alpha-2-macroglobulin receptor-associated protein OS=Homo sapiens GN=LRPAP1 PE=1 SV=1	16	-0.449521	25.9094	WT_GBA - CT	0.00175553	0.0149965	FALSE	no hit	7.66967
SKI	P12755	Ski oncogene OS=Homo sapiens GN=SKI PE=1 SV=1	4	0.307345	23.5636	WT_GBA - CT	0.00176017	0.0150111	FALSE	no hit	6.12971
ZNF593	O00488	Zinc finger protein 593 OS=Homo sapiens GN=ZNF593 PE=1 SV=2	4	0.421152	23.407	WT_GBA - CT	0.00176213	0.0150111	FALSE	no hit	6.76031
TRIM24	O15164|O15164-2	Transcription intermediary factor 1-alpha OS=Homo sapiens GN=TRIM24 PE=1 SV=3|Isoform Short of Transcription intermediary factor 1-alpha OS=Homo sapiens GN=TRIM24	5	0.340301	23.4878	WT_GBA - CT	0.00177052	0.0150617	FALSE	no hit	6.48725
UMPS	E9PFD2|P11172|P11172-3	Isoform 3 of Uridine 5'-monophosphate synthase OS=Homo sapiens GN=UMPS|Uridine 5'-monophosphate synthase OS=Homo sapiens GN=UMPS PE=1 SV=1	16	-0.237404	25.9005	WT_GBA - CT	0.0017755	0.0150832	FALSE	no hit	7.30782
CNTN1	Q12860|Q12860-2	Contactin-1 OS=Homo sapiens GN=CNTN1 PE=1 SV=1|Isoform 2 of Contactin-1 OS=Homo sapiens GN=CNTN1	2	-0.724018	21.4456	WT_GBA - CT	0.00178016	0.0151019	FALSE	candidate	6.19764
AGL	P35573|P35573-2|P35573-3	Glycogen debranching enzyme OS=Homo sapiens GN=AGL PE=1 SV=3|Isoform 5 of Glycogen debranching enzyme OS=Homo sapiens GN=AGL|Isoform 6 of Glycogen debranching enzyme OS=Homo sapiens GN=AGL	25	-0.177217	26.3235	WT_GBA - CT	0.0017851	0.0151229	FALSE	no hit	7.05433
PCCA	P05165|P05165-2|P05165-3	Propionyl-CoA carboxylase alpha chain, mitochondrial OS=Homo sapiens GN=PCCA PE=1 SV=4|Isoform 2 of Propionyl-CoA carboxylase alpha chain, mitochondrial OS=Homo sapiens GN=PCCA|Isoform 3 of Propionyl-CoA carboxylase alpha chain, mitochondrial OS=Homo sapiens GN=PCCA	7	-0.47607	24.1184	WT_GBA - CT	0.00179185	0.0151504	FALSE	no hit	6.44293
CETN3	E5RJF8|E5RK82|O15182	Centrin-3 OS=Homo sapiens GN=CETN3 PE=1 SV=1|Centrin-3 OS=Homo sapiens GN=CETN3 PE=1 SV=1|Centrin-3 OS=Homo sapiens GN=CETN3 PE=1 SV=2	5	-0.521155	24.7809	WT_GBA - CT	0.00179608	0.0151504	FALSE	no hit	6.91529
UPF3B	Q9BZI7|Q9BZI7-2	Regulator of nonsense transcripts 3B OS=Homo sapiens GN=UPF3B PE=1 SV=1|Isoform 2 of Regulator of nonsense transcripts 3B OS=Homo sapiens GN=UPF3B	14	0.194632	25.9009	WT_GBA - CT	0.00179671	0.0151504	FALSE	no hit	7.31219
TRMT10A	Q8TBZ6	tRNA methyltransferase 10 homolog A OS=Homo sapiens GN=TRMT10A PE=1 SV=1	6	0.268387	23.7581	WT_GBA - CT	0.00179822	0.0151504	FALSE	no hit	6.44225
G3V3G9	G3V3G9	Uncharacterized protein OS=Homo sapiens PE=4 SV=1	5	-0.352328	24.3959	WT_GBA - CT	0.0018074	0.0152069	FALSE	no hit	6.70383
XPO5	H0Y9I3|Q9HAV4	Exportin-5 (Fragment) OS=Homo sapiens GN=XPO5 PE=1 SV=1|Exportin-5 OS=Homo sapiens GN=XPO5 PE=1 SV=1	25	0.199721	27.2394	WT_GBA - CT	0.00181243	0.0152284	FALSE	no hit	7.82033
SESN2	P58004	Sestrin-2 OS=Homo sapiens GN=SESN2 PE=1 SV=1	3	0.352341	22.2246	WT_GBA - CT	0.00181771	0.0152519	FALSE	no hit	6.55448
AACS	Q86V21	Acetoacetyl-CoA synthetase OS=Homo sapiens GN=AACS PE=1 SV=1	10	-0.257952	25.2856	WT_GBA - CT	0.00182169	0.0152644	FALSE	no hit	6.90792
COG3	Q96JB2	Conserved oligomeric Golgi complex subunit 3 OS=Homo sapiens GN=COG3 PE=1 SV=3	13	0.184883	25.0427	WT_GBA - CT	0.00182702	0.0152882	FALSE	no hit	6.77937
RAB1A	P62820	Ras-related protein Rab-1A OS=Homo sapiens GN=RAB1A PE=1 SV=3	6	0.215135	25.8512	WT_GBA - CT	0.00182982	0.0152908	FALSE	no hit	7.77946
TUBB4A	P04350	Tubulin beta-4A chain OS=Homo sapiens GN=TUBB4A PE=1 SV=2	2	-0.502909	22.5236	WT_GBA - CT	0.00184876	0.0154281	FALSE	no hit	6.60018
FKBP4	Q02790	Peptidyl-prolyl cis-trans isomerase FKBP4 OS=Homo sapiens GN=FKBP4 PE=1 SV=3	37	-0.20704	28.4263	WT_GBA - CT	0.00186004	0.0155012	FALSE	no hit	8.28585
RBM15B	Q8NDT2	Putative RNA-binding protein 15B OS=Homo sapiens GN=RBM15B PE=1 SV=3	6	-0.24272	23.7255	WT_GBA - CT	0.00187478	0.0156028	FALSE	no hit	6.52214
CDKN2AIP	Q9NXV6	CDKN2A-interacting protein OS=Homo sapiens GN=CDKN2AIP PE=1 SV=3	15	-0.199736	25.7298	WT_GBA - CT	0.00187841	0.0156119	FALSE	no hit	6.98689
ANKS1A	Q92625	Ankyrin repeat and SAM domain-containing protein 1A OS=Homo sapiens GN=ANKS1A PE=1 SV=4	13	0.213931	25.1452	WT_GBA - CT	0.00188212	0.0156216	FALSE	no hit	6.82329
L3HYPDH	Q96EM0	Trans-3-hydroxy-L-proline dehydratase OS=Homo sapiens GN=L3HYPDH PE=1 SV=2	3	-0.298712	23.5822	WT_GBA - CT	0.00188567	0.0156299	FALSE	no hit	6.37336
ODR4	Q5SWX8	Protein odr-4 homolog OS=Homo sapiens GN=ODR4 PE=1 SV=1	5	0.239569	23.8445	WT_GBA - CT	0.00190185	0.0157428	FALSE	no hit	6.81316
HK1	P19367|P19367-2|P19367-3|P19367-4	Hexokinase-1 OS=Homo sapiens GN=HK1 PE=1 SV=3|Isoform 2 of Hexokinase-1 OS=Homo sapiens GN=HK1|Isoform 3 of Hexokinase-1 OS=Homo sapiens GN=HK1|Isoform 4 of Hexokinase-1 OS=Homo sapiens GN=HK1	30	-0.215957	27.2583	WT_GBA - CT	0.00191522	0.0158322	FALSE	no hit	7.71641
YOD1	Q5VVQ6|Q5VVQ6-2	Ubiquitin thioesterase OTU1 OS=Homo sapiens GN=YOD1 PE=1 SV=1|Isoform 2 of Ubiquitin thioesterase OTU1 OS=Homo sapiens GN=YOD1	7	-0.220414	24.1765	WT_GBA - CT	0.00193982	0.0159945	FALSE	no hit	6.94248
SLC35F2	Q8IXU6|Q8IXU6-3	Solute carrier family 35 member F2 OS=Homo sapiens GN=SLC35F2 PE=1 SV=1|Isoform 3 of Solute carrier family 35 member F2 OS=Homo sapiens GN=SLC35F2	2	0.324907	20.8663	WT_GBA - CT	0.00194054	0.0159945	FALSE	no hit	6.18404
KIF2A	O00139-2	Isoform 2 of Kinesin-like protein KIF2A OS=Homo sapiens GN=KIF2A	25	-0.229421	26.2653	WT_GBA - CT	0.00194402	0.0159945	FALSE	no hit	7.48688
AGPAT1	Q99943	1-acyl-sn-glycerol-3-phosphate acyltransferase alpha OS=Homo sapiens GN=AGPAT1 PE=1 SV=2	6	0.280717	24.4024	WT_GBA - CT	0.00194527	0.0159945	FALSE	no hit	7.17315
LLGL2	J3QRV5|Q6P1M3|Q6P1M3-2	Lethal(2) giant larvae protein homolog 2 OS=Homo sapiens GN=LLGL2 PE=1 SV=1|Lethal(2) giant larvae protein homolog 2 OS=Homo sapiens GN=LLGL2 PE=1 SV=2|Isoform A of Lethal(2) giant larvae protein homolog 2 OS=Homo sapiens GN=LLGL2	3	-0.20419	22.6608	WT_GBA - CT	0.00195595	0.0160607	FALSE	no hit	6.02292
RPN2	P04844|P04844-2	Dolichyl-diphosphooligosaccharide--protein glycosyltransferase subunit 2 OS=Homo sapiens GN=RPN2 PE=1 SV=3|Isoform 2 of Dolichyl-diphosphooligosaccharide--protein glycosyltransferase subunit 2 OS=Homo sapiens GN=RPN2	12	0.190084	25.9212	WT_GBA - CT	0.00196187	0.0160879	FALSE	no hit	7.93072
RIOK1	Q9BRS2	Serine/threonine-protein kinase RIO1 OS=Homo sapiens GN=RIOK1 PE=1 SV=2	10	0.290859	25.107	WT_GBA - CT	0.00197098	0.016141	FALSE	no hit	7.09331
FMR1	Q06787|Q06787-3|Q06787-5|Q06787-7|Q06787-8|Q06787-9	Synaptic functional regulator FMR1 OS=Homo sapiens GN=FMR1 PE=1 SV=1|Isoform 2 of Synaptic functional regulator FMR1 OS=Homo sapiens GN=FMR1|Isoform 4 of Synaptic functional regulator FMR1 OS=Homo sapiens GN=FMR1|Isoform 7 of Synaptic functional regulator FMR1 OS=Homo sapiens GN=FMR1|Isoform 8 of Synaptic functional regulator FMR1 OS=Homo sapiens GN=FMR1|Isoform 9 of Synaptic functional regulator…	14	-0.328083	25.2874	WT_GBA - CT	0.00198023	0.0161952	FALSE	no hit	7.2398
SOD1	P00441	Superoxide dismutase [Cu-Zn] OS=Homo sapiens GN=SOD1 PE=1 SV=2	15	-0.215062	27.3045	WT_GBA - CT	0.0019867	0.0162265	FALSE	no hit	8.43165
NDUFA9	Q16795	NADH dehydrogenase [ubiquinone] 1 alpha subcomplex subunit 9, mitochondrial OS=Homo sapiens GN=NDUFA9 PE=1 SV=2	6	0.531072	23.956	WT_GBA - CT	0.00199475	0.0162706	FALSE	no hit	6.72944
SCAMP3	O14828	Secretory carrier-associated membrane protein 3 OS=Homo sapiens GN=SCAMP3 PE=1 SV=3	11	0.204228	25.8864	WT_GBA - CT	0.00200715	0.01635	FALSE	no hit	7.71629
GPALPP1	A0A0A0MRI1|Q8IXQ4	GPALPP motifs-containing protein 1 OS=Homo sapiens GN=GPALPP1 PE=1 SV=1|GPALPP motifs-containing protein 1 OS=Homo sapiens GN=GPALPP1 PE=1 SV=1	9	-0.513111	25.0473	WT_GBA - CT	0.00201296	0.0163756	FALSE	no hit	7.46411
CUTA	O60888|O60888-2|O60888-3	Protein CutA OS=Homo sapiens GN=CUTA PE=1 SV=2|Isoform A of Protein CutA OS=Homo sapiens GN=CUTA|Isoform C of Protein CutA OS=Homo sapiens GN=CUTA	4	0.376956	22.6483	WT_GBA - CT	0.00202155	0.0164238	FALSE	no hit	5.90012
INTS3	Q68E01-2	Isoform 2 of Integrator complex subunit 3 OS=Homo sapiens GN=INTS3	8	0.209879	24.4361	WT_GBA - CT	0.00202636	0.0164411	FALSE	no hit	6.76484
TOR1A	O14656	Torsin-1A OS=Homo sapiens GN=TOR1A PE=1 SV=1	3	-0.232581	23.5942	WT_GBA - CT	0.00203164	0.0164534	FALSE	no hit	6.63225
KIAA0753	Q2KHM9	Protein moonraker OS=Homo sapiens GN=KIAA0753 PE=1 SV=3	2	0.281988	21.7567	WT_GBA - CT	0.00203324	0.0164534	FALSE	no hit	5.76775
TDRKH	F6TB26|Q5SZR4|Q9Y2W6	Tudor and KH domain-containing protein OS=Homo sapiens GN=TDRKH PE=1 SV=1|Tudor and KH domain containing, isoform CRA_a OS=Homo sapiens GN=TDRKH PE=1 SV=1|Tudor and KH domain-containing protein OS=Homo sapiens GN=TDRKH PE=1 SV=2	6	0.336606	23.9982	WT_GBA - CT	0.00207793	0.0167812	FALSE	no hit	6.53351
HEXB	P07686	Beta-hexosaminidase subunit beta OS=Homo sapiens GN=HEXB PE=1 SV=3	16	-0.211988	26.3181	WT_GBA - CT	0.00208061	0.0167812	FALSE	no hit	7.71707
IGF1R	C9J5X1|P08069	Tyrosine-protein kinase receptor OS=Homo sapiens GN=IGF1R PE=1 SV=1|Insulin-like growth factor 1 receptor OS=Homo sapiens GN=IGF1R PE=1 SV=1	9	0.190472	25.2412	WT_GBA - CT	0.00208194	0.0167812	FALSE	no hit	6.92743
FASN	A0A0U1RQF0|P49327	Fatty acid synthase OS=Homo sapiens GN=FASN PE=1 SV=1|Fatty acid synthase OS=Homo sapiens GN=FASN PE=1 SV=3	94	-0.206486	28.9774	WT_GBA - CT	0.00209455	0.0168607	FALSE	no hit	8.354
TXLNG	Q9NUQ3	Gamma-taxilin OS=Homo sapiens GN=TXLNG PE=1 SV=2	17	-0.195091	26.4903	WT_GBA - CT	0.00210446	0.0169183	FALSE	no hit	7.27863
UCHL1	P09936	Ubiquitin carboxyl-terminal hydrolase isozyme L1 OS=Homo sapiens GN=UCHL1 PE=1 SV=2	16	-0.192916	27.7679	WT_GBA - CT	0.00211596	0.0169885	FALSE	no hit	8.49845
AGTPBP1	J3KNS1|Q9UPW5|Q9UPW5-2|Q9UPW5-3	Cytosolic carboxypeptidase 1 OS=Homo sapiens GN=AGTPBP1 PE=1 SV=1|Cytosolic carboxypeptidase 1 OS=Homo sapiens GN=AGTPBP1 PE=1 SV=3|Isoform 2 of Cytosolic carboxypeptidase 1 OS=Homo sapiens GN=AGTPBP1|Isoform 3 of Cytosolic carboxypeptidase 1 OS=Homo sapiens GN=AGTPBP1	5	-0.188392	22.8053	WT_GBA - CT	0.00211948	0.0169946	FALSE	no hit	6.31421
SDHB	P21912	Succinate dehydrogenase [ubiquinone] iron-sulfur subunit, mitochondrial OS=Homo sapiens GN=SDHB PE=1 SV=3	13	0.269805	26.4299	WT_GBA - CT	0.00213059	0.0170614	FALSE	no hit	7.78278
ATP7B	B7ZLR4|E7ET55|F5H562|F5H748|P35670|P35670-2|P35670-3|P35670-4	ATP7B protein OS=Homo sapiens GN=ATP7B PE=1 SV=1|Copper-transporting ATPase 2 OS=Homo sapiens GN=ATP7B PE=1 SV=2|Copper-transporting ATPase 2 OS=Homo sapiens GN=ATP7B PE=1 SV=1|Copper-transporting ATPase 2 OS=Homo sapiens GN=ATP7B PE=1 SV=1|Copper-transporting ATPase 2 OS=Homo sapiens GN=ATP7B PE=1 SV=4|Isoform 2 of Copper-transporting ATPase 2 OS=Homo sapiens GN=ATP7B|Isoform 3 of Copper-transpo…	2	0.238554	22.4408	WT_GBA - CT	0.00213567	0.0170697	FALSE	no hit	6.33521
NPC2	E7EMS2|G3V3D1|G3V3E8|J3KMY5|P61916	Epididymal secretory protein E1 OS=Homo sapiens GN=NPC2 PE=1 SV=1|Epididymal secretory protein E1 (Fragment) OS=Homo sapiens GN=NPC2 PE=1 SV=1|Epididymal secretory protein E1 OS=Homo sapiens GN=NPC2 PE=1 SV=1|Epididymal secretory protein E1 OS=Homo sapiens GN=NPC2 PE=1 SV=1|Epididymal secretory protein E1 OS=Homo sapiens GN=NPC2 PE=1 SV=1	5	0.373842	25.5275	WT_GBA - CT	0.00213743	0.0170697	FALSE	no hit	7.34668
OGDH	A0A0D9SFS3|Q02218	2-oxoglutarate dehydrogenase, mitochondrial OS=Homo sapiens GN=OGDH PE=1 SV=1|2-oxoglutarate dehydrogenase, mitochondrial OS=Homo sapiens GN=OGDH PE=1 SV=3	19	-0.226839	25.8411	WT_GBA - CT	0.00213997	0.0170697	FALSE	no hit	7.18451
RANBP1	P43487|P43487-2	Ran-specific GTPase-activating protein OS=Homo sapiens GN=RANBP1 PE=1 SV=1|Isoform 2 of Ran-specific GTPase-activating protein OS=Homo sapiens GN=RANBP1	14	-0.440174	27.6807	WT_GBA - CT	0.00215086	0.0171252	FALSE	no hit	8.50848
IKBIP	Q70UQ0|Q70UQ0-4	Inhibitor of nuclear factor kappa-B kinase-interacting protein OS=Homo sapiens GN=IKBIP PE=1 SV=1|Isoform 4 of Inhibitor of nuclear factor kappa-B kinase-interacting protein OS=Homo sapiens GN=IKBIP	32	0.244484	27.2415	WT_GBA - CT	0.0021525	0.0171252	FALSE	no hit	7.42878
TOM1	O60784|O60784-3	Target of Myb protein 1 OS=Homo sapiens GN=TOM1 PE=1 SV=2|Isoform 3 of Target of Myb protein 1 OS=Homo sapiens GN=TOM1	7	0.275724	24.7133	WT_GBA - CT	0.00216675	0.0171991	FALSE	no hit	6.69878
NDUFA7	O95182	NADH dehydrogenase [ubiquinone] 1 alpha subcomplex subunit 7 OS=Homo sapiens GN=NDUFA7 PE=1 SV=3	3	0.75972	23.8745	WT_GBA - CT	0.00216739	0.0171991	FALSE	candidate	6.77519
TMX4	Q9H1E5	Thioredoxin-related transmembrane protein 4 OS=Homo sapiens GN=TMX4 PE=1 SV=1	3	-0.321364	23.3016	WT_GBA - CT	0.00217186	0.0172124	FALSE	no hit	6.27854
IRF2BPL	Q9H1B7	Interferon regulatory factor 2-binding protein-like OS=Homo sapiens GN=IRF2BPL PE=1 SV=1	14	0.190071	25.1564	WT_GBA - CT	0.00217599	0.0172228	FALSE	no hit	6.73328
EIF4G3	A0A0U1RQK7	Eukaryotic translation initiation factor 4 gamma 3 OS=Homo sapiens GN=EIF4G3 PE=1 SV=1	44	-0.187429	27.3579	WT_GBA - CT	0.00219169	0.0173248	FALSE	no hit	7.23847
ENDOD1	O94919	Endonuclease domain-containing 1 protein OS=Homo sapiens GN=ENDOD1 PE=1 SV=2	7	-0.210064	23.3355	WT_GBA - CT	0.00220053	0.0173543	FALSE	no hit	6.60053
DPH2	Q9BQC3	Diphthamide biosynthesis protein 2 OS=Homo sapiens GN=DPH2 PE=1 SV=1	7	0.269094	24.5769	WT_GBA - CT	0.00220108	0.0173543	FALSE	no hit	6.90253
SCRN1	Q12765	Secernin-1 OS=Homo sapiens GN=SCRN1 PE=1 SV=2	11	-0.189345	25.8835	WT_GBA - CT	0.00220993	0.0174018	FALSE	no hit	7.40779
DNAAF2	Q9NVR5	Protein kintoun OS=Homo sapiens GN=DNAAF2 PE=1 SV=2	5	0.199211	23.4943	WT_GBA - CT	0.0022134	0.0174033	FALSE	no hit	6.33915
EMB	Q6PCB8|Q6PCB8-2	Embigin OS=Homo sapiens GN=EMB PE=1 SV=1|Isoform 2 of Embigin OS=Homo sapiens GN=EMB	5	0.248274	24.2088	WT_GBA - CT	0.00221579	0.0174033	FALSE	no hit	6.94916
ITPR3	Q14573	Inositol 1,4,5-trisphosphate receptor type 3 OS=Homo sapiens GN=ITPR3 PE=1 SV=2	10	-0.267036	24.65	WT_GBA - CT	0.00223442	0.0175272	FALSE	no hit	6.93474
NAGA	P17050	Alpha-N-acetylgalactosaminidase OS=Homo sapiens GN=NAGA PE=1 SV=2	2	0.381298	22.2041	WT_GBA - CT	0.00225227	0.0176447	FALSE	no hit	6.27532
NADK2	Q4G0N4	NAD kinase 2, mitochondrial OS=Homo sapiens GN=NADK2 PE=1 SV=2	13	0.236746	25.5882	WT_GBA - CT	0.00225994	0.017666	FALSE	no hit	7.10074
SLC30A7	Q8NEW0	Zinc transporter 7 OS=Homo sapiens GN=SLC30A7 PE=2 SV=1	2	-0.312349	22.3401	WT_GBA - CT	0.00226081	0.017666	FALSE	no hit	6.30711
TNPO2	O14787-2	Isoform 2 of Transportin-2 OS=Homo sapiens GN=TNPO2	3	-0.220245	23.8801	WT_GBA - CT	0.00226362	0.017666	FALSE	no hit	6.52564
APRT	P07741	Adenine phosphoribosyltransferase OS=Homo sapiens GN=APRT PE=1 SV=2	6	-0.370031	25.6102	WT_GBA - CT	0.00227596	0.0177257	FALSE	no hit	7.8973
SCAMP4	Q969E2|Q969E2-2	Secretory carrier-associated membrane protein 4 OS=Homo sapiens GN=SCAMP4 PE=1 SV=1|Isoform 2 of Secretory carrier-associated membrane protein 4 OS=Homo sapiens GN=SCAMP4	2	0.251427	22.6072	WT_GBA - CT	0.00227705	0.0177257	FALSE	no hit	6.16039
AMDHD2	Q9Y303|Q9Y303-2|Q9Y303-3	N-acetylglucosamine-6-phosphate deacetylase OS=Homo sapiens GN=AMDHD2 PE=1 SV=2|Isoform 2 of N-acetylglucosamine-6-phosphate deacetylase OS=Homo sapiens GN=AMDHD2|Isoform 3 of N-acetylglucosamine-6-phosphate deacetylase OS=Homo sapiens GN=AMDHD2	3	0.207694	23.5117	WT_GBA - CT	0.00229072	0.0178096	FALSE	no hit	6.30513
ANKRD54	Q6NXT1	Ankyrin repeat domain-containing protein 54 OS=Homo sapiens GN=ANKRD54 PE=1 SV=2	5	0.316904	24.4176	WT_GBA - CT	0.00230267	0.0178799	FALSE	no hit	7.01522
RNF214	Q8ND24	RING finger protein 214 OS=Homo sapiens GN=RNF214 PE=1 SV=2	10	-0.16961	25.2238	WT_GBA - CT	0.00231033	0.0179167	FALSE	no hit	6.98499
C18ORF8	A0A087WZD4|K7EIS6|K7ENL9|Q96DM3	Uncharacterized protein C18orf8 OS=Homo sapiens GN=C18orf8 PE=1 SV=1|Uncharacterized protein C18orf8 OS=Homo sapiens GN=C18orf8 PE=1 SV=1|Uncharacterized protein C18orf8 OS=Homo sapiens GN=C18orf8 PE=1 SV=1|Uncharacterized protein C18orf8 OS=Homo sapiens GN=C18orf8 PE=1 SV=2	2	-0.360895	21.4409	WT_GBA - CT	0.00232158	0.0179813	FALSE	no hit	6.37858
PREB	Q9HCU5	Prolactin regulatory element-binding protein OS=Homo sapiens GN=PREB PE=1 SV=2	8	0.206778	24.6604	WT_GBA - CT	0.0023272	0.0179899	FALSE	no hit	7.22614
PDCL3	Q9H2J4	Phosducin-like protein 3 OS=Homo sapiens GN=PDCL3 PE=1 SV=1	8	0.251981	25.9773	WT_GBA - CT	0.00232855	0.0179899	FALSE	no hit	7.43261
NFATC2IP	Q8NCF5	NFATC2-interacting protein OS=Homo sapiens GN=NFATC2IP PE=1 SV=1	2	-0.393473	23.1049	WT_GBA - CT	0.0023334	0.0180047	FALSE	no hit	6.54314
MLEC	Q14165	Malectin OS=Homo sapiens GN=MLEC PE=1 SV=1	8	0.346158	25.046	WT_GBA - CT	0.00233863	0.0180157	FALSE	no hit	6.95552
ZBTB10	Q96DT7	Zinc finger and BTB domain-containing protein 10 OS=Homo sapiens GN=ZBTB10 PE=1 SV=2	9	0.244149	24.8463	WT_GBA - CT	0.00234069	0.0180157	FALSE	no hit	6.57067
LSS	P48449|P48449-3	Lanosterol synthase OS=Homo sapiens GN=LSS PE=1 SV=1|Isoform 3 of Lanosterol synthase OS=Homo sapiens GN=LSS	8	0.24623	24.4682	WT_GBA - CT	0.00235323	0.0180636	FALSE	no hit	6.85164
TSSC1	A8MUM1|Q53HC9	Protein TSSC1 OS=Homo sapiens GN=TSSC1 PE=1 SV=2|Protein TSSC1 OS=Homo sapiens GN=TSSC1 PE=1 SV=2	8	-0.384074	24.9596	WT_GBA - CT	0.00235449	0.0180636	FALSE	no hit	6.76381
FYCO1	Q9BQS8|Q9BQS8-4	FYVE and coiled-coil domain-containing protein 1 OS=Homo sapiens GN=FYCO1 PE=1 SV=3|Isoform 4 of FYVE and coiled-coil domain-containing protein 1 OS=Homo sapiens GN=FYCO1	14	-0.262234	25.3074	WT_GBA - CT	0.00235574	0.0180636	FALSE	no hit	6.55231
ZHX2	Q9Y6X8	Zinc fingers and homeoboxes protein 2 OS=Homo sapiens GN=ZHX2 PE=1 SV=1	7	-0.230222	24.3492	WT_GBA - CT	0.00237061	0.018155	FALSE	no hit	6.41408
TRIM26	Q12899	Tripartite motif-containing protein 26 OS=Homo sapiens GN=TRIM26 PE=1 SV=1	9	0.33012	24.4334	WT_GBA - CT	0.00237714	0.0181816	FALSE	no hit	6.70555
FBXO4	D6RAJ6|Q9UKT5|Q9UKT5-2	F-box only protein 4 OS=Homo sapiens GN=FBXO4 PE=1 SV=1|F-box only protein 4 OS=Homo sapiens GN=FBXO4 PE=1 SV=2|Isoform 2 of F-box only protein 4 OS=Homo sapiens GN=FBXO4	3	0.207322	23.0336	WT_GBA - CT	0.00238001	0.0181816	FALSE	no hit	5.76214
KIAA0196	E7EQI7|Q12768	WASH complex subunit strumpellin OS=Homo sapiens GN=KIAA0196 PE=1 SV=1|WASH complex subunit strumpellin OS=Homo sapiens GN=KIAA0196 PE=1 SV=1	6	-0.249501	23.1248	WT_GBA - CT	0.00239359	0.0182559	FALSE	no hit	6.35812
ACTR1A	P61163	Alpha-centractin OS=Homo sapiens GN=ACTR1A PE=1 SV=1	8	-0.174145	25.2479	WT_GBA - CT	0.00239862	0.0182559	FALSE	no hit	7.62518
SETX	Q7Z333|Q7Z333-3|Q7Z333-4	Probable helicase senataxin OS=Homo sapiens GN=SETX PE=1 SV=4|Isoform 3 of Probable helicase senataxin OS=Homo sapiens GN=SETX|Isoform 4 of Probable helicase senataxin OS=Homo sapiens GN=SETX	9	0.201464	24.5064	WT_GBA - CT	0.00239866	0.0182559	FALSE	no hit	6.45607
SLIT2	O94813|X6R3P0	Slit homolog 2 protein OS=Homo sapiens GN=SLIT2 PE=1 SV=1|Slit homolog 2 protein OS=Homo sapiens GN=SLIT2 PE=1 SV=1	10	-0.333409	23.9654	WT_GBA - CT	0.00240355	0.0182706	FALSE	no hit	6.32063
NCAPD3	P42695	Condensin-2 complex subunit D3 OS=Homo sapiens GN=NCAPD3 PE=1 SV=2	10	0.214472	24.9302	WT_GBA - CT	0.00240888	0.0182711	FALSE	no hit	6.99478
PHLDB1	Q86UU1|Q86UU1-2	Pleckstrin homology-like domain family B member 1 OS=Homo sapiens GN=PHLDB1 PE=1 SV=1|Isoform 2 of Pleckstrin homology-like domain family B member 1 OS=Homo sapiens GN=PHLDB1	5	-0.405953	23.3222	WT_GBA - CT	0.00241226	0.0182711	FALSE	no hit	5.92611
CEP97	E9PG22|Q8IW35|Q8IW35-2	Centrosomal protein of 97 kDa OS=Homo sapiens GN=CEP97 PE=1 SV=1|Centrosomal protein of 97 kDa OS=Homo sapiens GN=CEP97 PE=1 SV=1|Isoform 2 of Centrosomal protein of 97 kDa OS=Homo sapiens GN=CEP97	9	-0.201155	24.7271	WT_GBA - CT	0.00241255	0.0182711	FALSE	no hit	6.56569
ATG13	O75143|O75143-2|O75143-5	Autophagy-related protein 13 OS=Homo sapiens GN=ATG13 PE=1 SV=1|Isoform 2 of Autophagy-related protein 13 OS=Homo sapiens GN=ATG13|Isoform 5 of Autophagy-related protein 13 OS=Homo sapiens GN=ATG13	2	0.199528	21.9518	WT_GBA - CT	0.00242607	0.0183509	FALSE	no hit	5.88191
CDC16	Q13042|Q13042-2|Q13042-3	Cell division cycle protein 16 homolog OS=Homo sapiens GN=CDC16 PE=1 SV=2|Isoform 2 of Cell division cycle protein 16 homolog OS=Homo sapiens GN=CDC16|Isoform 3 of Cell division cycle protein 16 homolog OS=Homo sapiens GN=CDC16	11	-0.219237	25.4958	WT_GBA - CT	0.00244441	0.0184668	FALSE	no hit	7.03224
WDR46	A0A140T9L0|O15213	WD repeat-containing protein 46 (Fragment) OS=Homo sapiens GN=WDR46 PE=1 SV=1|WD repeat-containing protein 46 OS=Homo sapiens GN=WDR46 PE=1 SV=3	3	0.572425	21.7717	WT_GBA - CT	0.00245813	0.0185299	FALSE	no hit	5.98544
PTDSS2	Q9BVG9	Phosphatidylserine synthase 2 OS=Homo sapiens GN=PTDSS2 PE=1 SV=1	2	0.349095	22.3105	WT_GBA - CT	0.00245879	0.0185299	FALSE	no hit	6.74352
DIS3L2	Q8IYB7	DIS3-like exonuclease 2 OS=Homo sapiens GN=DIS3L2 PE=1 SV=4	4	0.287545	23.7231	WT_GBA - CT	0.00246375	0.0185446	FALSE	no hit	6.08511
KIF23	Q02241|Q02241-2	Kinesin-like protein KIF23 OS=Homo sapiens GN=KIF23 PE=1 SV=3|Isoform 2 of Kinesin-like protein KIF23 OS=Homo sapiens GN=KIF23	17	-0.288085	26.2303	WT_GBA - CT	0.00247233	0.0185864	FALSE	no hit	7.20134
UBE2M	P61081	NEDD8-conjugating enzyme Ubc12 OS=Homo sapiens GN=UBE2M PE=1 SV=1	13	-0.22225	26.5842	WT_GBA - CT	0.00251306	0.0188695	FALSE	no hit	8.04709
RMDN3	Q96TC7	Regulator of microtubule dynamics protein 3 OS=Homo sapiens GN=RMDN3 PE=1 SV=2	3	-0.544062	22.9706	WT_GBA - CT	0.00251997	0.0188982	FALSE	no hit	6.18627
NDUFA12	Q9UI09	NADH dehydrogenase [ubiquinone] 1 alpha subcomplex subunit 12 OS=Homo sapiens GN=NDUFA12 PE=1 SV=1	4	0.806659	24.2987	WT_GBA - CT	0.00252496	0.0189125	FALSE	candidate	6.79622
SRSF11	Q05519|Q05519-2	Serine/arginine-rich splicing factor 11 OS=Homo sapiens GN=SRSF11 PE=1 SV=1|Isoform 2 of Serine/arginine-rich splicing factor 11 OS=Homo sapiens GN=SRSF11	12	0.183683	26.3165	WT_GBA - CT	0.00252814	0.0189134	FALSE	no hit	7.50697
TCF7L2	A0A0A0MTL7|A0A0D9SGH8|C6ZRJ7|C6ZRK5|E2GH26|Q5VVR7|Q5VVR8|Q9NQB0|Q9NQB0-10|Q9NQB0-11|Q9NQB0-12|Q9NQB0-13|Q9NQB0-14|Q9NQB0-15|Q9NQB0-16|Q9NQB0-2|Q9NQB0-3|Q9NQB0-4|Q9NQB0-5|Q9NQB0-6|Q9NQB0-7|Q9NQB0-8|Q9NQB0-9	Transcription factor 7-like 2 OS=Homo sapiens GN=TCF7L2 PE=1 SV=1|Transcription factor 7-like 2 OS=Homo sapiens GN=TCF7L2 PE=1 SV=1|TCF7L2 isoform pFC8A_TCF7L2_A3,ex1-12,13,13a OS=Homo sapiens GN=TCF7L2 PE=1 SV=1|TCF7L2 isoform pFC8A_TCF7L2_ex1-11-13-14 OS=Homo sapiens GN=TCF7L2 PE=1 SV=1|T-cell factor-4 variant L OS=Homo sapiens GN=TCF7L2 PE=1 SV=1|Transcription factor 7-like 2 OS=Homo sapiens G…	2	0.312583	23.3948	WT_GBA - CT	0.00253848	0.0189676	FALSE	no hit	6.33452
ALG13	Q9NP73|Q9NP73-4	Putative bifunctional UDP-N-acetylglucosamine transferase and deubiquitinase ALG13 OS=Homo sapiens GN=ALG13 PE=1 SV=2|Isoform 4 of Putative bifunctional UDP-N-acetylglucosamine transferase and deubiquitinase ALG13 OS=Homo sapiens GN=ALG13	4	0.214617	23.2451	WT_GBA - CT	0.00258193	0.0192644	FALSE	no hit	6.55716
FNBP1L	Q5T0N5-3|Q5T0N5-4	Isoform 3 of Formin-binding protein 1-like OS=Homo sapiens GN=FNBP1L|Isoform 4 of Formin-binding protein 1-like OS=Homo sapiens GN=FNBP1L	8	-0.292672	24.3896	WT_GBA - CT	0.00258448	0.0192644	FALSE	no hit	6.85266
UNC45A	Q9H3U1|Q9H3U1-2	Protein unc-45 homolog A OS=Homo sapiens GN=UNC45A PE=1 SV=1|Isoform 2 of Protein unc-45 homolog A OS=Homo sapiens GN=UNC45A	32	-0.231131	27.2372	WT_GBA - CT	0.00259414	0.019313	FALSE	no hit	7.59502
LONRF2	Q1L5Z9	LON peptidase N-terminal domain and RING finger protein 2 OS=Homo sapiens GN=LONRF2 PE=2 SV=3	9	0.230084	24.2213	WT_GBA - CT	0.00264451	0.0196417	FALSE	no hit	6.60652
XRN1	Q8IZH2|Q8IZH2-2	5'-3' exoribonuclease 1 OS=Homo sapiens GN=XRN1 PE=1 SV=1|Isoform 2 of 5'-3' exoribonuclease 1 OS=Homo sapiens GN=XRN1	16	-0.178961	25.5069	WT_GBA - CT	0.00264468	0.0196417	FALSE	no hit	6.7728
ZC3HC1	C9J0I9|Q86WB0	Nuclear-interacting partner of ALK OS=Homo sapiens GN=ZC3HC1 PE=1 SV=1|Nuclear-interacting partner of ALK OS=Homo sapiens GN=ZC3HC1 PE=1 SV=1	13	0.187932	25.6276	WT_GBA - CT	0.0026607	0.0197368	FALSE	no hit	7.19777
SAE1	Q9UBE0	SUMO-activating enzyme subunit 1 OS=Homo sapiens GN=SAE1 PE=1 SV=1	15	-0.181511	26.8732	WT_GBA - CT	0.00268461	0.0198514	FALSE	no hit	7.73199
SEC16A	J3KNL6	Protein transport protein Sec16A OS=Homo sapiens GN=SEC16A PE=1 SV=1	28	-0.16995	26.5682	WT_GBA - CT	0.00268534	0.0198514	FALSE	no hit	7.16556
C5ORF51	A6NDU8	UPF0600 protein C5orf51 OS=Homo sapiens GN=C5orf51 PE=1 SV=1	5	0.254053	24.4217	WT_GBA - CT	0.00268585	0.0198514	FALSE	no hit	6.97638
CMPK1	P30085	UMP-CMP kinase OS=Homo sapiens GN=CMPK1 PE=1 SV=3	8	-0.203214	25.7786	WT_GBA - CT	0.00268981	0.0198567	FALSE	no hit	7.50754
RBM42	Q9BTD8	RNA-binding protein 42 OS=Homo sapiens GN=RBM42 PE=1 SV=1	9	0.187722	24.0645	WT_GBA - CT	0.00270915	0.0199755	FALSE	no hit	7.62811
CAT	P04040	Catalase OS=Homo sapiens GN=CAT PE=1 SV=3	14	-0.207094	25.6345	WT_GBA - CT	0.00272255	0.0200502	FALSE	no hit	7.14186
E4F1	H3BUJ7|Q66K89	Transcription factor E4F1 OS=Homo sapiens GN=E4F1 PE=1 SV=1|Transcription factor E4F1 OS=Homo sapiens GN=E4F1 PE=1 SV=2	2	0.314838	22.8121	WT_GBA - CT	0.00274403	0.0201843	FALSE	no hit	6.22432
AHNAK	Q09666	Neuroblast differentiation-associated protein AHNAK OS=Homo sapiens GN=AHNAK PE=1 SV=2	125	0.233769	28.823	WT_GBA - CT	0.00276333	0.0203019	FALSE	no hit	7.63433
NSF	I3L0N3|P46459	Vesicle-fusing ATPase OS=Homo sapiens GN=NSF PE=1 SV=1|Vesicle-fusing ATPase OS=Homo sapiens GN=NSF PE=1 SV=3	27	-0.164089	27.2803	WT_GBA - CT	0.00280206	0.0205618	FALSE	no hit	7.54775
MAP1LC3B2|MAP1LC3B	A6NCE7|H3BTL1|Q9GZQ8	Microtubule-associated proteins 1A/1B light chain 3 beta 2 OS=Homo sapiens GN=MAP1LC3B2 PE=2 SV=1|Microtubule-associated protein 1 light chain 3 beta, isoform CRA_f OS=Homo sapiens GN=MAP1LC3B PE=3 SV=1|Microtubule-associated proteins 1A/1B light chain 3B OS=Homo sapiens GN=MAP1LC3B PE=1 SV=3	3	-0.306625	23.6773	WT_GBA - CT	0.00281332	0.0206198	FALSE	no hit	7.25073
CTSD	P07339	Cathepsin D OS=Homo sapiens GN=CTSD PE=1 SV=1	10	0.246787	25.4968	WT_GBA - CT	0.00282718	0.0206967	FALSE	no hit	7.71782
POLB	P06746	DNA polymerase beta OS=Homo sapiens GN=POLB PE=1 SV=3	6	-0.167362	24.3366	WT_GBA - CT	0.00283409	0.0207226	FALSE	no hit	6.9431
APTX	A0A0A0MRW7|Q7Z2E3|Q7Z2E3-3|Q7Z2E3-7|Q7Z2E3-8	Aprataxin OS=Homo sapiens GN=APTX PE=1 SV=1|Aprataxin OS=Homo sapiens GN=APTX PE=1 SV=2|Isoform 3 of Aprataxin OS=Homo sapiens GN=APTX|Isoform 7 of Aprataxin OS=Homo sapiens GN=APTX|Isoform 8 of Aprataxin OS=Homo sapiens GN=APTX	5	0.176165	24.1836	WT_GBA - CT	0.00284389	0.0207695	FALSE	no hit	6.34204
KDM3B	Q7LBC6	Lysine-specific demethylase 3B OS=Homo sapiens GN=KDM3B PE=1 SV=2	33	0.169567	27.0803	WT_GBA - CT	0.00284977	0.0207877	FALSE	no hit	7.2528
MFF	Q9GZY8-2	Isoform 2 of Mitochondrial fission factor OS=Homo sapiens GN=MFF	8	0.2422	23.7094	WT_GBA - CT	0.00285484	0.0208	FALSE	no hit	6.67685
ILVBL	A1L0T0	Acetolactate synthase-like protein OS=Homo sapiens GN=ILVBL PE=1 SV=2	10	0.181523	24.2164	WT_GBA - CT	0.00285824	0.0208001	FALSE	no hit	7.28163
CA13	Q8N1Q1	Carbonic anhydrase 13 OS=Homo sapiens GN=CA13 PE=1 SV=1	2	-0.362669	21.8521	WT_GBA - CT	0.0028834	0.0209584	FALSE	no hit	5.67603
UBE2J1	Q9Y385	Ubiquitin-conjugating enzyme E2 J1 OS=Homo sapiens GN=UBE2J1 PE=1 SV=2	5	0.420043	24.0335	WT_GBA - CT	0.00289188	0.0209952	FALSE	no hit	6.91875
CUEDC2	Q9H467	CUE domain-containing protein 2 OS=Homo sapiens GN=CUEDC2 PE=1 SV=1	6	-0.459617	24.7764	WT_GBA - CT	0.00291314	0.0210833	FALSE	no hit	7.14117
MYO1E	Q12965	Unconventional myosin-Ie OS=Homo sapiens GN=MYO1E PE=1 SV=2	7	0.166189	24.6881	WT_GBA - CT	0.0029141	0.0210833	FALSE	no hit	6.42885
SEPT8	A0A087X142|A6NFQ9|A6NMH6|F8W8I8|Q92599|Q92599-2|Q92599-4	Septin-8 OS=Homo sapiens GN=SEPT8 PE=1 SV=1|Septin-8 OS=Homo sapiens GN=SEPT8 PE=1 SV=1|Septin-8 OS=Homo sapiens GN=SEPT8 PE=1 SV=1|Septin-8 OS=Homo sapiens GN=SEPT8 PE=1 SV=1|Septin-8 OS=Homo sapiens GN=SEPT8 PE=1 SV=4|Isoform 2 of Septin-8 OS=Homo sapiens GN=SEPT8|Isoform 4 of Septin-8 OS=Homo sapiens GN=SEPT8	7	-0.17636	25.2197	WT_GBA - CT	0.00291431	0.0210833	FALSE	no hit	7.23372
RNH1	P13489	Ribonuclease inhibitor OS=Homo sapiens GN=RNH1 PE=1 SV=2	14	-0.238258	26.1685	WT_GBA - CT	0.00291835	0.0210876	FALSE	no hit	7.66547
TTC9C	E9PKV8|Q8N5M4	Tetratricopeptide repeat protein 9C (Fragment) OS=Homo sapiens GN=TTC9C PE=1 SV=1|Tetratricopeptide repeat protein 9C OS=Homo sapiens GN=TTC9C PE=1 SV=1	5	-0.256308	24.7186	WT_GBA - CT	0.00292279	0.0210949	FALSE	no hit	6.95581
RAPH1	C9K0J5|Q70E73	Ras association (RalGDS/AF-6) and pleckstrin homology domains 1, isoform CRA_b OS=Homo sapiens GN=RAPH1 PE=1 SV=1|Ras-associated and pleckstrin homology domains-containing protein 1 OS=Homo sapiens GN=RAPH1 PE=1 SV=3	8	-0.197232	24.3627	WT_GBA - CT	0.00294077	0.0211921	FALSE	no hit	6.50928
GATAD2A	Q86YP4|Q86YP4-3	Transcriptional repressor p66-alpha OS=Homo sapiens GN=GATAD2A PE=1 SV=1|Isoform 3 of Transcriptional repressor p66-alpha OS=Homo sapiens GN=GATAD2A	17	0.205706	26.4899	WT_GBA - CT	0.00294316	0.0211921	FALSE	no hit	7.10113
TCEA2	A0A0A0MT58|Q15560|Q15560-2	Transcription elongation factor A protein 2 (Fragment) OS=Homo sapiens GN=TCEA2 PE=1 SV=1|Transcription elongation factor A protein 2 OS=Homo sapiens GN=TCEA2 PE=1 SV=1|Isoform 2 of Transcription elongation factor A protein 2 OS=Homo sapiens GN=TCEA2	2	-0.212668	21.5337	WT_GBA - CT	0.0029472	0.0211964	FALSE	no hit	5.77257
LLGL1	Q15334	Lethal(2) giant larvae protein homolog 1 OS=Homo sapiens GN=LLGL1 PE=1 SV=3	16	-0.205183	25.3931	WT_GBA - CT	0.00295451	0.0212194	FALSE	no hit	7.12459
POLD3	E9PRK3|Q15054|Q15054-2|Q15054-3	DNA polymerase delta subunit 3 (Fragment) OS=Homo sapiens GN=POLD3 PE=1 SV=1|DNA polymerase delta subunit 3 OS=Homo sapiens GN=POLD3 PE=1 SV=2|Isoform 2 of DNA polymerase delta subunit 3 OS=Homo sapiens GN=POLD3|Isoform 3 of DNA polymerase delta subunit 3 OS=Homo sapiens GN=POLD3	9	-0.208695	24.9329	WT_GBA - CT	0.00295731	0.0212194	FALSE	no hit	6.98481
CPPED1	Q9BRF8	Serine/threonine-protein phosphatase CPPED1 OS=Homo sapiens GN=CPPED1 PE=1 SV=3	4	-0.252869	24.199	WT_GBA - CT	0.00296533	0.0212521	FALSE	no hit	6.58369
EPHB4	P54760	Ephrin type-B receptor 4 OS=Homo sapiens GN=EPHB4 PE=1 SV=2	8	0.228972	24.637	WT_GBA - CT	0.00297664	0.0213083	FALSE	no hit	6.62411
MAGED1	Q9Y5V3|Q9Y5V3-2	Melanoma-associated antigen D1 OS=Homo sapiens GN=MAGED1 PE=1 SV=3|Isoform 2 of Melanoma-associated antigen D1 OS=Homo sapiens GN=MAGED1	3	0.236572	23.3651	WT_GBA - CT	0.00298449	0.0213396	FALSE	no hit	6.55291
ANKRD27	Q96NW4	Ankyrin repeat domain-containing protein 27 OS=Homo sapiens GN=ANKRD27 PE=1 SV=2	4	-0.231621	23.4254	WT_GBA - CT	0.0029894	0.0213499	FALSE	no hit	6.07716
CMC2	Q9NRP2	COX assembly mitochondrial protein 2 homolog OS=Homo sapiens GN=CMC2 PE=1 SV=1	4	-0.314957	23.6702	WT_GBA - CT	0.0029965	0.0213648	FALSE	no hit	6.69763
CD63	F8VV56|F8VWK8|F8W022|P08962|P08962-2|P08962-3	CD63 antigen OS=Homo sapiens GN=CD63 PE=1 SV=1|Tetraspanin (Fragment) OS=Homo sapiens GN=CD63 PE=1 SV=1|Tetraspanin (Fragment) OS=Homo sapiens GN=CD63 PE=1 SV=1|CD63 antigen OS=Homo sapiens GN=CD63 PE=1 SV=2|Isoform 2 of CD63 antigen OS=Homo sapiens GN=CD63|Isoform 3 of CD63 antigen OS=Homo sapiens GN=CD63	4	0.242273	25.8149	WT_GBA - CT	0.00299859	0.0213648	FALSE	no hit	7.35988
CXORF57	Q6NSI4	Uncharacterized protein CXorf57 OS=Homo sapiens GN=CXorf57 PE=1 SV=2	5	0.282093	23.2212	WT_GBA - CT	0.00300193	0.0213648	FALSE	no hit	6.64658
SMARCC2	Q8TAQ2	SWI/SNF complex subunit SMARCC2 OS=Homo sapiens GN=SMARCC2 PE=1 SV=1	34	-0.183322	27.2652	WT_GBA - CT	0.003007	0.0213761	FALSE	no hit	7.49775
COLEC12	Q5KU26	Collectin-12 OS=Homo sapiens GN=COLEC12 PE=1 SV=3	9	0.262151	25.0729	WT_GBA - CT	0.0030173	0.0214246	FALSE	no hit	6.94933
CD55	B1AP13|B1AP15|H3BLV0|H7BY55|P08174|P08174-2|P08174-3|P08174-4|P08174-5|P08174-6|P08174-7	Complement decay-accelerating factor OS=Homo sapiens GN=CD55 PE=1 SV=1|CD55 antigen, decay accelerating factor for complement (Cromer blood group), isoform CRA_d OS=Homo sapiens GN=CD55 PE=1 SV=1|Complement decay-accelerating factor (Fragment) OS=Homo sapiens GN=CD55 PE=1 SV=1|Complement decay-accelerating factor OS=Homo sapiens GN=CD55 PE=1 SV=2|Complement decay-accelerating factor OS=Homo sapie…	3	-0.336595	23.7621	WT_GBA - CT	0.0030308	0.0214956	FALSE	no hit	6.24898
MRFAP1	Q9Y605	MORF4 family-associated protein 1 OS=Homo sapiens GN=MRFAP1 PE=1 SV=1	3	0.260018	23.76	WT_GBA - CT	0.00305328	0.02163	FALSE	no hit	6.94669
TRUB2	O95900	Probable tRNA pseudouridine synthase 2 OS=Homo sapiens GN=TRUB2 PE=1 SV=1	5	0.247859	23.5652	WT_GBA - CT	0.0030591	0.0216351	FALSE	no hit	6.35689
BUD31	P41223	Protein BUD31 homolog OS=Homo sapiens GN=BUD31 PE=1 SV=2	7	0.359944	24.9693	WT_GBA - CT	0.00306348	0.0216351	FALSE	no hit	7.19252
TCF12	Q99081|Q99081-3	Transcription factor 12 OS=Homo sapiens GN=TCF12 PE=1 SV=1|Isoform 3 of Transcription factor 12 OS=Homo sapiens GN=TCF12	3	0.246239	22.7735	WT_GBA - CT	0.00306732	0.0216351	FALSE	no hit	6.35854
PHYH	B1ALH6|O14832	Phytanoyl-CoA dioxygenase, peroxisomal OS=Homo sapiens GN=PHYH PE=1 SV=1|Phytanoyl-CoA dioxygenase, peroxisomal OS=Homo sapiens GN=PHYH PE=1 SV=1	3	-0.260375	23.1355	WT_GBA - CT	0.00306809	0.0216351	FALSE	no hit	6.48709
LMAN1	P49257	Protein ERGIC-53 OS=Homo sapiens GN=LMAN1 PE=1 SV=2	17	0.182118	26.8514	WT_GBA - CT	0.00307283	0.0216437	FALSE	no hit	7.71581
SDCCAG3	Q96C92|Q96C92-2	Serologically defined colon cancer antigen 3 OS=Homo sapiens GN=SDCCAG3 PE=1 SV=3|Isoform 2 of Serologically defined colon cancer antigen 3 OS=Homo sapiens GN=SDCCAG3	6	-0.245456	23.9685	WT_GBA - CT	0.00307706	0.0216487	FALSE	no hit	6.2652
ITGB1	P05556	Integrin beta-1 OS=Homo sapiens GN=ITGB1 PE=1 SV=2	22	-0.26073	26.815	WT_GBA - CT	0.00308626	0.0216886	FALSE	no hit	7.49794
CNPY2	Q9Y2B0	Protein canopy homolog 2 OS=Homo sapiens GN=CNPY2 PE=1 SV=1	12	-0.317826	26.129	WT_GBA - CT	0.00310039	0.0217469	FALSE	no hit	7.99461
POLR2C	P19387	DNA-directed RNA polymerase II subunit RPB3 OS=Homo sapiens GN=POLR2C PE=1 SV=2	8	0.180056	24.8096	WT_GBA - CT	0.00310165	0.0217469	FALSE	no hit	7.42195
TMLHE	Q9NVH6|Q9NVH6-5|Q9NVH6-6|Q9NVH6-7|Q9NVH6-8	Trimethyllysine dioxygenase, mitochondrial OS=Homo sapiens GN=TMLHE PE=1 SV=1|Isoform 5 of Trimethyllysine dioxygenase, mitochondrial OS=Homo sapiens GN=TMLHE|Isoform 6 of Trimethyllysine dioxygenase, mitochondrial OS=Homo sapiens GN=TMLHE|Isoform 7 of Trimethyllysine dioxygenase, mitochondrial OS=Homo sapiens GN=TMLHE|Isoform 8 of Trimethyllysine dioxygenase, mitochondrial OS=Homo sapiens GN=TML…	3	0.253791	23.186	WT_GBA - CT	0.00311504	0.021816	FALSE	no hit	6.3304
ATP8A1	Q9Y2Q0|Q9Y2Q0-2|Q9Y2Q0-3	Phospholipid-transporting ATPase IA OS=Homo sapiens GN=ATP8A1 PE=1 SV=1|Isoform 2 of Phospholipid-transporting ATPase IA OS=Homo sapiens GN=ATP8A1|Isoform 3 of Phospholipid-transporting ATPase IA OS=Homo sapiens GN=ATP8A1	2	0.651427	20.8829	WT_GBA - CT	0.00312512	0.0218616	FALSE	candidate	5.71591
NME3	Q13232	Nucleoside diphosphate kinase 3 OS=Homo sapiens GN=NME3 PE=1 SV=2	5	-0.271756	24.3115	WT_GBA - CT	0.00313698	0.0219127	FALSE	no hit	6.74534
CAD	P27708	CAD protein OS=Homo sapiens GN=CAD PE=1 SV=3	52	-0.182881	27.3675	WT_GBA - CT	0.00314131	0.0219127	FALSE	no hit	7.80994
NDUFS4	O43181	NADH dehydrogenase [ubiquinone] iron-sulfur protein 4, mitochondrial OS=Homo sapiens GN=NDUFS4 PE=1 SV=1	4	0.656308	24.1452	WT_GBA - CT	0.00314521	0.0219127	FALSE	candidate	6.66635
GIT1	Q9Y2X7|Q9Y2X7-3	ARF GTPase-activating protein GIT1 OS=Homo sapiens GN=GIT1 PE=1 SV=2|Isoform 3 of ARF GTPase-activating protein GIT1 OS=Homo sapiens GN=GIT1	19	-0.23784	26.0332	WT_GBA - CT	0.00315106	0.0219127	FALSE	no hit	7.01217
RAB18	Q9NP72	Ras-related protein Rab-18 OS=Homo sapiens GN=RAB18 PE=1 SV=1	7	-0.217251	24.9575	WT_GBA - CT	0.00315333	0.0219127	FALSE	no hit	7.23732
OXSR1	O95747	Serine/threonine-protein kinase OSR1 OS=Homo sapiens GN=OXSR1 PE=1 SV=1	8	-0.196793	24.7047	WT_GBA - CT	0.00315384	0.0219127	FALSE	no hit	7.36513
UTP14A	Q9BVJ6	U3 small nucleolar RNA-associated protein 14 homolog A OS=Homo sapiens GN=UTP14A PE=1 SV=1	13	0.319333	25.6945	WT_GBA - CT	0.00317259	0.0220181	FALSE	no hit	6.78761
AIF1L	Q9BQI0|Q9BQI0-3	Allograft inflammatory factor 1-like OS=Homo sapiens GN=AIF1L PE=1 SV=1|Isoform 3 of Allograft inflammatory factor 1-like OS=Homo sapiens GN=AIF1L	7	-0.381359	25.0108	WT_GBA - CT	0.00319463	0.0221251	FALSE	no hit	6.91552
KMT2C	Q8NEZ4|Q8NEZ4-3	Histone-lysine N-methyltransferase 2C OS=Homo sapiens GN=KMT2C PE=1 SV=3|Isoform 3 of Histone-lysine N-methyltransferase 2C OS=Homo sapiens GN=KMT2C	3	0.301695	22.8994	WT_GBA - CT	0.00319521	0.0221251	FALSE	no hit	6.59005
BUD13	Q9BRD0	BUD13 homolog OS=Homo sapiens GN=BUD13 PE=1 SV=1	5	-0.253248	24.1179	WT_GBA - CT	0.00322069	0.0222764	FALSE	no hit	6.42933
SDF4	Q9BRK5	45 kDa calcium-binding protein OS=Homo sapiens GN=SDF4 PE=1 SV=1	11	0.391201	25.8066	WT_GBA - CT	0.00322809	0.0223025	FALSE	no hit	7.68431
POLR1C	O15160	DNA-directed RNA polymerases I and III subunit RPAC1 OS=Homo sapiens GN=POLR1C PE=1 SV=1	10	0.218206	25.2192	WT_GBA - CT	0.00325662	0.0224744	FALSE	no hit	7.46816
BAIAP2	I3L4C2|Q9UQB8|Q9UQB8-2|Q9UQB8-3|Q9UQB8-4|Q9UQB8-5	Brain-specific angiogenesis inhibitor 1-associated protein 2 OS=Homo sapiens GN=BAIAP2 PE=1 SV=1|Brain-specific angiogenesis inhibitor 1-associated protein 2 OS=Homo sapiens GN=BAIAP2 PE=1 SV=1|Isoform 2 of Brain-specific angiogenesis inhibitor 1-associated protein 2 OS=Homo sapiens GN=BAIAP2|Isoform 3 of Brain-specific angiogenesis inhibitor 1-associated protein 2 OS=Homo sapiens GN=BAIAP2|Isofo…	18	-0.219821	25.9584	WT_GBA - CT	0.00326644	0.0225168	FALSE	no hit	6.80164
RRS1	Q15050	Ribosome biogenesis regulatory protein homolog OS=Homo sapiens GN=RRS1 PE=1 SV=2	12	-0.32972	25.0025	WT_GBA - CT	0.00327212	0.02252	FALSE	no hit	7.11875
SOD2	A0A0C4DFU2|P04179|P04179-4	Superoxide dismutase OS=Homo sapiens GN=SOD2 PE=1 SV=1|Superoxide dismutase [Mn], mitochondrial OS=Homo sapiens GN=SOD2 PE=1 SV=2|Isoform 4 of Superoxide dismutase [Mn], mitochondrial OS=Homo sapiens GN=SOD2	9	-0.247804	25.8337	WT_GBA - CT	0.00327424	0.02252	FALSE	no hit	7.80714
TRMT61B	Q9BVS5	tRNA (adenine(58)-N(1))-methyltransferase, mitochondrial OS=Homo sapiens GN=TRMT61B PE=1 SV=2	3	0.31303	22.8132	WT_GBA - CT	0.00327988	0.0225225	FALSE	no hit	6.10208
DYNC1LI2	O43237	Cytoplasmic dynein 1 light intermediate chain 2 OS=Homo sapiens GN=DYNC1LI2 PE=1 SV=1	12	-0.196672	25.4125	WT_GBA - CT	0.00328409	0.0225225	FALSE	no hit	7.06927
SPICE1	Q8N0Z3	Spindle and centriole-associated protein 1 OS=Homo sapiens GN=SPICE1 PE=1 SV=1	4	-0.417577	23.1172	WT_GBA - CT	0.0032856	0.0225225	FALSE	no hit	6.42473
OCRL	Q01968|Q01968-2	Inositol polyphosphate 5-phosphatase OCRL-1 OS=Homo sapiens GN=OCRL PE=1 SV=3|Isoform B of Inositol polyphosphate 5-phosphatase OCRL-1 OS=Homo sapiens GN=OCRL	12	-0.193184	25.4552	WT_GBA - CT	0.00331633	0.0226811	FALSE	no hit	6.67639
NIFK	Q9BYG3	MKI67 FHA domain-interacting nucleolar phosphoprotein OS=Homo sapiens GN=NIFK PE=1 SV=1	11	-0.234473	25.6675	WT_GBA - CT	0.00331751	0.0226811	FALSE	no hit	6.93228
DNAJB9	Q9UBS3	DnaJ homolog subfamily B member 9 OS=Homo sapiens GN=DNAJB9 PE=1 SV=1	2	0.500183	20.8617	WT_GBA - CT	0.00331982	0.0226811	FALSE	no hit	5.69317
PKN3	Q6P5Z2	Serine/threonine-protein kinase N3 OS=Homo sapiens GN=PKN3 PE=1 SV=1	4	-0.264188	23.1108	WT_GBA - CT	0.00333541	0.0227431	FALSE	no hit	6.07865
GPM6B	B7Z613|Q13491-4	Neuronal membrane glycoprotein M6-b OS=Homo sapiens GN=GPM6B PE=1 SV=1|Isoform 4 of Neuronal membrane glycoprotein M6-b OS=Homo sapiens GN=GPM6B	3	0.219977	23.5836	WT_GBA - CT	0.0033363	0.0227431	FALSE	no hit	6.34942
TXNL4B	H3BN11|H3BUL8|Q9NX01	Thioredoxin-like protein 4B (Fragment) OS=Homo sapiens GN=TXNL4B PE=1 SV=1|Thioredoxin-like protein 4B (Fragment) OS=Homo sapiens GN=TXNL4B PE=1 SV=7|Thioredoxin-like protein 4B OS=Homo sapiens GN=TXNL4B PE=1 SV=1	2	0.22292	23.2794	WT_GBA - CT	0.0033494	0.022791	FALSE	no hit	6.51116
SMPDL3B	Q92485	Acid sphingomyelinase-like phosphodiesterase 3b OS=Homo sapiens GN=SMPDL3B PE=1 SV=2	2	-0.375585	22.3248	WT_GBA - CT	0.0033516	0.022791	FALSE	no hit	5.9388
NT5C3A	Q9H0P0|X6RM59	Cytosolic 5'-nucleotidase 3A OS=Homo sapiens GN=NT5C3A PE=1 SV=3|5'-nucleotidase OS=Homo sapiens GN=NT5C3A PE=1 SV=1	12	0.243304	25.637	WT_GBA - CT	0.00335446	0.022791	FALSE	no hit	7.17679
GTF3C3	Q9Y5Q9	General transcription factor 3C polypeptide 3 OS=Homo sapiens GN=GTF3C3 PE=1 SV=1	9	0.184654	25.0116	WT_GBA - CT	0.00338343	0.0229539	FALSE	no hit	7.0174
HAGH	Q16775	Hydroxyacylglutathione hydrolase, mitochondrial OS=Homo sapiens GN=HAGH PE=1 SV=2	6	-0.262145	24.9666	WT_GBA - CT	0.00338591	0.0229539	FALSE	no hit	7.2752
NDUFS3	O75489	NADH dehydrogenase [ubiquinone] iron-sulfur protein 3, mitochondrial OS=Homo sapiens GN=NDUFS3 PE=1 SV=1	15	0.268689	25.6733	WT_GBA - CT	0.00340808	0.0230787	FALSE	no hit	7.44917
TPP1	A0A0C4DGZ9|O14773|O14773-2	Tripeptidyl-peptidase 1 OS=Homo sapiens GN=TPP1 PE=1 SV=1|Tripeptidyl-peptidase 1 OS=Homo sapiens GN=TPP1 PE=1 SV=2|Isoform 2 of Tripeptidyl-peptidase 1 OS=Homo sapiens GN=TPP1	5	0.256568	23.5981	WT_GBA - CT	0.00342063	0.0231382	FALSE	no hit	6.79903
C6ORF89	Q6UWU4-3	Isoform 3 of Bombesin receptor-activated protein C6orf89 OS=Homo sapiens GN=C6orf89	2	0.299623	22.4121	WT_GBA - CT	0.00344207	0.0232493	FALSE	no hit	6.1188
L1RE1	Q9UN81	LINE-1 retrotransposable element ORF1 protein OS=Homo sapiens GN=L1RE1 PE=1 SV=1	7	0.284252	24.8864	WT_GBA - CT	0.00344462	0.0232493	FALSE	no hit	6.94682
LSM8	O95777	U6 snRNA-associated Sm-like protein LSm8 OS=Homo sapiens GN=LSM8 PE=1 SV=3	2	0.226264	22.5547	WT_GBA - CT	0.00346322	0.0233271	FALSE	no hit	6.81398
NDUFB8	O95169|O95169-3	NADH dehydrogenase [ubiquinone] 1 beta subcomplex subunit 8, mitochondrial OS=Homo sapiens GN=NDUFB8 PE=1 SV=1|Isoform 3 of NADH dehydrogenase [ubiquinone] 1 beta subcomplex subunit 8, mitochondrial OS=Homo sapiens GN=NDUFB8	3	0.512972	23.2803	WT_GBA - CT	0.00346375	0.0233271	FALSE	no hit	6.89892
KIF1C	O43896	Kinesin-like protein KIF1C OS=Homo sapiens GN=KIF1C PE=1 SV=3	5	-0.218403	23.8406	WT_GBA - CT	0.00347221	0.0233363	FALSE	no hit	6.37992
LYN	P07948|P07948-2	Tyrosine-protein kinase Lyn OS=Homo sapiens GN=LYN PE=1 SV=3|Isoform 2 of Tyrosine-protein kinase Lyn OS=Homo sapiens GN=LYN	6	-0.457791	23.8164	WT_GBA - CT	0.00347271	0.0233363	FALSE	no hit	6.36682
TNFRSF10B	O14763|O14763-2	Tumor necrosis factor receptor superfamily member 10B OS=Homo sapiens GN=TNFRSF10B PE=1 SV=2|Isoform Short of Tumor necrosis factor receptor superfamily member 10B OS=Homo sapiens GN=TNFRSF10B	4	-0.261588	23.0601	WT_GBA - CT	0.00348274	0.0233586	FALSE	no hit	6.23835
PPP1R3D	O95685	Protein phosphatase 1 regulatory subunit 3D OS=Homo sapiens GN=PPP1R3D PE=1 SV=1	2	-0.322472	21.9015	WT_GBA - CT	0.00348364	0.0233586	FALSE	no hit	6.30675
NAPRT	G5E977|Q6XQN6|Q6XQN6-2	Nicotinate phosphoribosyltransferase OS=Homo sapiens GN=NAPRT PE=1 SV=1|Nicotinate phosphoribosyltransferase OS=Homo sapiens GN=NAPRT PE=1 SV=2|Isoform 2 of Nicotinate phosphoribosyltransferase OS=Homo sapiens GN=NAPRT	4	0.274335	23.0306	WT_GBA - CT	0.00351063	0.023514	FALSE	no hit	6.20092
CAMK4	Q16566	Calcium/calmodulin-dependent protein kinase type IV OS=Homo sapiens GN=CAMK4 PE=1 SV=1	3	-0.219572	23.6986	WT_GBA - CT	0.00352505	0.0235848	FALSE	no hit	6.24339
ACP2	E9PQY3|P11117	Lysosomal acid phosphatase OS=Homo sapiens GN=ACP2 PE=1 SV=1|Lysosomal acid phosphatase OS=Homo sapiens GN=ACP2 PE=1 SV=3	3	0.19939	23.2234	WT_GBA - CT	0.00356821	0.0238398	FALSE	no hit	6.14946
IQGAP3	Q86VI3	Ras GTPase-activating-like protein IQGAP3 OS=Homo sapiens GN=IQGAP3 PE=1 SV=2	12	-0.167897	24.8024	WT_GBA - CT	0.00357092	0.0238398	FALSE	no hit	6.4533
CRYZL1	O95825	Quinone oxidoreductase-like protein 1 OS=Homo sapiens GN=CRYZL1 PE=1 SV=2	6	0.195982	24.651	WT_GBA - CT	0.00357568	0.0238436	FALSE	no hit	6.76064
QTRTD1	Q9H974|Q9H974-4	Queuine tRNA-ribosyltransferase subunit QTRTD1 OS=Homo sapiens GN=QTRTD1 PE=1 SV=1|Isoform 4 of Queuine tRNA-ribosyltransferase subunit QTRTD1 OS=Homo sapiens GN=QTRTD1	7	0.226518	23.6241	WT_GBA - CT	0.00357926	0.0238436	FALSE	no hit	6.69202
PIK3R2	O00459	Phosphatidylinositol 3-kinase regulatory subunit beta OS=Homo sapiens GN=PIK3R2 PE=1 SV=2	7	-0.249067	23.8355	WT_GBA - CT	0.00358543	0.0238588	FALSE	no hit	6.27579
USP47	Q96K76|Q96K76-4	Ubiquitin carboxyl-terminal hydrolase 47 OS=Homo sapiens GN=USP47 PE=1 SV=3|Isoform 4 of Ubiquitin carboxyl-terminal hydrolase 47 OS=Homo sapiens GN=USP47	21	-0.178053	26.2208	WT_GBA - CT	0.00359716	0.023911	FALSE	no hit	6.83711
ACYP2	P14621|U3KPX8|U3KQL2	Acylphosphatase-2 OS=Homo sapiens GN=ACYP2 PE=1 SV=2|Acylphosphatase-2 OS=Homo sapiens GN=ACYP2 PE=1 SV=1|Acylphosphatase-2 OS=Homo sapiens GN=ACYP2 PE=1 SV=1	3	-0.420945	23.3234	WT_GBA - CT	0.00360762	0.0239351	FALSE	no hit	6.19134
PARK7	K7ELW0|Q99497	Protein deglycase DJ-1 OS=Homo sapiens GN=PARK7 PE=1 SV=1|Protein deglycase DJ-1 OS=Homo sapiens GN=PARK7 PE=1 SV=2	16	0.396574	26.9233	WT_GBA - CT	0.00361019	0.0239351	FALSE	no hit	8.39783
METAP2	F8VQZ7|P50579	Methionine aminopeptidase 2 OS=Homo sapiens GN=METAP2 PE=1 SV=1|Methionine aminopeptidase 2 OS=Homo sapiens GN=METAP2 PE=1 SV=1	18	0.280045	25.8965	WT_GBA - CT	0.00361248	0.0239351	FALSE	no hit	7.35987
UTP11	Q9Y3A2	Probable U3 small nucleolar RNA-associated protein 11 OS=Homo sapiens GN=UTP11 PE=1 SV=2	3	0.217015	22.9887	WT_GBA - CT	0.00364288	0.0241034	FALSE	no hit	5.82473
PIGA	P37287|P37287-3	Phosphatidylinositol N-acetylglucosaminyltransferase subunit A OS=Homo sapiens GN=PIGA PE=1 SV=1|Isoform 3 of Phosphatidylinositol N-acetylglucosaminyltransferase subunit A OS=Homo sapiens GN=PIGA	2	0.329277	22.3129	WT_GBA - CT	0.00364573	0.0241034	FALSE	no hit	6.25449
DNAJC8	O75937	DnaJ homolog subfamily C member 8 OS=Homo sapiens GN=DNAJC8 PE=1 SV=2	12	-0.405071	26.5069	WT_GBA - CT	0.00366772	0.0242227	FALSE	no hit	8.07401
SETD3	Q86TU7	Histone-lysine N-methyltransferase setd3 OS=Homo sapiens GN=SETD3 PE=1 SV=1	18	0.195586	26.2861	WT_GBA - CT	0.00369002	0.0243438	FALSE	no hit	7.31871
GABARAPL2	P60520	Gamma-aminobutyric acid receptor-associated protein-like 2 OS=Homo sapiens GN=GABARAPL2 PE=1 SV=1	6	-0.224255	25.3359	WT_GBA - CT	0.00369636	0.0243595	FALSE	no hit	7.4812
PLXNA1	Q9UIW2	Plexin-A1 OS=Homo sapiens GN=PLXNA1 PE=1 SV=3	5	-0.190239	24.1205	WT_GBA - CT	0.00370223	0.024372	FALSE	no hit	6.73563
ULK1	O75385	Serine/threonine-protein kinase ULK1 OS=Homo sapiens GN=ULK1 PE=1 SV=2	2	-0.262549	22.2133	WT_GBA - CT	0.00374248	0.0246106	FALSE	no hit	6.04477
BZW2	E7ETZ4|Q9Y6E2	Basic leucine zipper and W2 domain-containing protein 2 (Fragment) OS=Homo sapiens GN=BZW2 PE=1 SV=1|Basic leucine zipper and W2 domain-containing protein 2 OS=Homo sapiens GN=BZW2 PE=1 SV=1	16	0.210425	26.6203	WT_GBA - CT	0.0037586	0.0246902	FALSE	no hit	7.44101
AEBP2	H7BYT4|Q6ZN18|Q6ZN18-2	Zinc finger protein AEBP2 (Fragment) OS=Homo sapiens GN=AEBP2 PE=1 SV=1|Zinc finger protein AEBP2 OS=Homo sapiens GN=AEBP2 PE=1 SV=2|Isoform 2 of Zinc finger protein AEBP2 OS=Homo sapiens GN=AEBP2	2	0.438549	21.1677	WT_GBA - CT	0.00376483	0.0247047	FALSE	no hit	5.66723
RNF2	Q99496	E3 ubiquitin-protein ligase RING2 OS=Homo sapiens GN=RNF2 PE=1 SV=1	7	0.2178	23.3121	WT_GBA - CT	0.00377914	0.0247721	FALSE	no hit	6.93846
WDR11	Q9BZH6	WD repeat-containing protein 11 OS=Homo sapiens GN=WDR11 PE=1 SV=1	12	-0.176038	25.2973	WT_GBA - CT	0.00378881	0.024809	FALSE	no hit	6.78634
ACSL1	P33121|P33121-2|P33121-3	Long-chain-fatty-acid--CoA ligase 1 OS=Homo sapiens GN=ACSL1 PE=1 SV=1|Isoform 2 of Long-chain-fatty-acid--CoA ligase 1 OS=Homo sapiens GN=ACSL1|Isoform 3 of Long-chain-fatty-acid--CoA ligase 1 OS=Homo sapiens GN=ACSL1	13	-0.16361	25.7117	WT_GBA - CT	0.00381866	0.0249778	FALSE	no hit	7.06597
RBBP9	O75884	Putative hydrolase RBBP9 OS=Homo sapiens GN=RBBP9 PE=1 SV=2	4	-0.194036	23.8015	WT_GBA - CT	0.00383304	0.0250452	FALSE	no hit	6.65128
TSR2	Q969E8	Pre-rRNA-processing protein TSR2 homolog OS=Homo sapiens GN=TSR2 PE=1 SV=1	3	0.228411	24.4717	WT_GBA - CT	0.00384261	0.0250711	FALSE	no hit	6.88748
LIMD1	Q9UGP4	LIM domain-containing protein 1 OS=Homo sapiens GN=LIMD1 PE=1 SV=1	8	-0.205418	24.1397	WT_GBA - CT	0.00384516	0.0250711	FALSE	no hit	6.79478
SQSTM1	Q13501|Q13501-2	Sequestosome-1 OS=Homo sapiens GN=SQSTM1 PE=1 SV=1|Isoform 2 of Sequestosome-1 OS=Homo sapiens GN=SQSTM1	8	-0.406914	24.5443	WT_GBA - CT	0.00386228	0.025156	FALSE	no hit	6.76678
DNAJB4	Q9UDY4	DnaJ homolog subfamily B member 4 OS=Homo sapiens GN=DNAJB4 PE=1 SV=1	5	0.187771	23.6636	WT_GBA - CT	0.00386641	0.0251563	FALSE	no hit	6.49444
GNPNAT1	G3V4W4|Q96EK6	Glucosamine 6-phosphate N-acetyltransferase (Fragment) OS=Homo sapiens GN=GNPNAT1 PE=1 SV=1|Glucosamine 6-phosphate N-acetyltransferase OS=Homo sapiens GN=GNPNAT1 PE=1 SV=1	3	0.287674	23.764	WT_GBA - CT	0.00387585	0.025191	FALSE	no hit	6.37116
ERI1	Q8IV48	3'-5' exoribonuclease 1 OS=Homo sapiens GN=ERI1 PE=1 SV=3	4	-0.243391	24.4819	WT_GBA - CT	0.00388756	0.0252404	FALSE	no hit	6.76834
VDAC3	Q9Y277|Q9Y277-2	Voltage-dependent anion-selective channel protein 3 OS=Homo sapiens GN=VDAC3 PE=1 SV=1|Isoform 2 of Voltage-dependent anion-selective channel protein 3 OS=Homo sapiens GN=VDAC3	5	-0.728459	24.8698	WT_GBA - CT	0.003894	0.0252555	FALSE	candidate	6.68536
SLC4A7	Q9Y6M7-13|Q9Y6M7-6	Isoform 13 of Sodium bicarbonate cotransporter 3 OS=Homo sapiens GN=SLC4A7|Isoform 6 of Sodium bicarbonate cotransporter 3 OS=Homo sapiens GN=SLC4A7	5	-0.390616	22.8036	WT_GBA - CT	0.00391983	0.0253962	FALSE	no hit	6.02362
ITGA2	E7ESP4|P17301	Integrin alpha-2 OS=Homo sapiens GN=ITGA2 PE=1 SV=1|Integrin alpha-2 OS=Homo sapiens GN=ITGA2 PE=1 SV=1	5	-0.292428	23.1729	WT_GBA - CT	0.0039284	0.0254249	FALSE	no hit	6.46342
NEK3	A0A087WY58|P51956	Serine/threonine-protein kinase Nek3 OS=Homo sapiens GN=NEK3 PE=1 SV=1|Serine/threonine-protein kinase Nek3 OS=Homo sapiens GN=NEK3 PE=1 SV=2	9	0.188071	24.5442	WT_GBA - CT	0.00394016	0.0254511	FALSE	no hit	6.90071
MRPS10	P82664	28S ribosomal protein S10, mitochondrial OS=Homo sapiens GN=MRPS10 PE=1 SV=2	3	0.266539	22.5247	WT_GBA - CT	0.00394073	0.0254511	FALSE	no hit	6.03943
CCDC90B	E9PKQ5|Q9GZT6|Q9GZT6-2	Coiled-coil domain-containing protein 90B, mitochondrial OS=Homo sapiens GN=CCDC90B PE=1 SV=1|Coiled-coil domain-containing protein 90B, mitochondrial OS=Homo sapiens GN=CCDC90B PE=1 SV=2|Isoform 2 of Coiled-coil domain-containing protein 90B, mitochondrial OS=Homo sapiens GN=CCDC90B	2	-0.249444	23.0198	WT_GBA - CT	0.0039537	0.025508	FALSE	no hit	6.3123
SPCS2	A0A087WUC6|E9PI68|Q15005	Signal peptidase complex subunit 2 OS=Homo sapiens GN=SPCS2 PE=1 SV=1|Signal peptidase complex subunit 2 OS=Homo sapiens GN=SPCS2 PE=1 SV=1|Signal peptidase complex subunit 2 OS=Homo sapiens GN=SPCS2 PE=1 SV=3	8	0.489716	25.5885	WT_GBA - CT	0.00397482	0.0256174	FALSE	no hit	7.47607
CHKA	E9PM06|P35790|P35790-2	Choline kinase alpha (Fragment) OS=Homo sapiens GN=CHKA PE=1 SV=1|Choline kinase alpha OS=Homo sapiens GN=CHKA PE=1 SV=3|Isoform 2 of Choline kinase alpha OS=Homo sapiens GN=CHKA	2	0.45758	21.8357	WT_GBA - CT	0.00398267	0.0256411	FALSE	no hit	5.99022
PPP6R1	Q9UPN7	Serine/threonine-protein phosphatase 6 regulatory subunit 1 OS=Homo sapiens GN=PPP6R1 PE=1 SV=5	9	-0.212094	24.4494	WT_GBA - CT	0.00398848	0.0256516	FALSE	no hit	7.18712
ANKRD44	Q8N8A2|Q8N8A2-2	Serine/threonine-protein phosphatase 6 regulatory ankyrin repeat subunit B OS=Homo sapiens GN=ANKRD44 PE=1 SV=3|Isoform 2 of Serine/threonine-protein phosphatase 6 regulatory ankyrin repeat subunit B OS=Homo sapiens GN=ANKRD44	2	-0.392005	21.776	WT_GBA - CT	0.00404234	0.0259708	FALSE	no hit	5.6051
LEMD2	Q8NC56	LEM domain-containing protein 2 OS=Homo sapiens GN=LEMD2 PE=1 SV=1	9	0.348883	24.8485	WT_GBA - CT	0.00405194	0.0260052	FALSE	no hit	7.20641
CRLF3	Q8IUI8|Q8IUI8-2	Cytokine receptor-like factor 3 OS=Homo sapiens GN=CRLF3 PE=1 SV=2|Isoform 2 of Cytokine receptor-like factor 3 OS=Homo sapiens GN=CRLF3	9	-0.177127	24.7365	WT_GBA - CT	0.00410271	0.0263036	FALSE	no hit	7.15413
CCDC174	Q6PII3	Coiled-coil domain-containing protein 174 OS=Homo sapiens GN=CCDC174 PE=1 SV=3	3	-0.199204	23.2354	WT_GBA - CT	0.00410776	0.0263085	FALSE	no hit	6.16896
DUS3L	Q96G46	tRNA-dihydrouridine(47) synthase [NAD(P)(+)]-like OS=Homo sapiens GN=DUS3L PE=1 SV=2	12	0.195337	24.9428	WT_GBA - CT	0.00411308	0.0263152	FALSE	no hit	6.92653
LUZP1	Q86V48	Leucine zipper protein 1 OS=Homo sapiens GN=LUZP1 PE=1 SV=2	30	-0.279497	26.7316	WT_GBA - CT	0.00412855	0.0263651	FALSE	no hit	6.79373
PLEKHA5	Q9HAU0|Q9HAU0-2|Q9HAU0-4|Q9HAU0-6	Pleckstrin homology domain-containing family A member 5 OS=Homo sapiens GN=PLEKHA5 PE=1 SV=1|Isoform 2 of Pleckstrin homology domain-containing family A member 5 OS=Homo sapiens GN=PLEKHA5|Isoform 4 of Pleckstrin homology domain-containing family A member 5 OS=Homo sapiens GN=PLEKHA5|Isoform 6 of Pleckstrin homology domain-containing family A member 5 OS=Homo sapiens GN=PLEKHA5	14	-0.160868	25.6537	WT_GBA - CT	0.00413233	0.0263651	FALSE	no hit	6.73951
RRP36	Q96EU6|Q96EU6-2	Ribosomal RNA processing protein 36 homolog OS=Homo sapiens GN=RRP36 PE=1 SV=1|Isoform 2 of Ribosomal RNA processing protein 36 homolog OS=Homo sapiens GN=RRP36	3	0.390222	23.3712	WT_GBA - CT	0.00413377	0.0263651	FALSE	no hit	6.30083
PHACTR4	Q8IZ21-3	Isoform 3 of Phosphatase and actin regulator 4 OS=Homo sapiens GN=PHACTR4	4	-0.250989	23.0834	WT_GBA - CT	0.00414162	0.026374	FALSE	no hit	6.65163
AAAS	Q9NRG9	Aladin OS=Homo sapiens GN=AAAS PE=1 SV=1	7	0.163195	24.6484	WT_GBA - CT	0.00414374	0.026374	FALSE	no hit	6.95481
MCM2	P49736	DNA replication licensing factor MCM2 OS=Homo sapiens GN=MCM2 PE=1 SV=4	36	0.218405	27.4846	WT_GBA - CT	0.00415734	0.0263854	FALSE	no hit	7.8479
PDCD10	C9J5C3|C9J6F3|Q9BUL8	Programmed cell death protein 10 (Fragment) OS=Homo sapiens GN=PDCD10 PE=1 SV=1|Programmed cell death protein 10 OS=Homo sapiens GN=PDCD10 PE=1 SV=1|Programmed cell death protein 10 OS=Homo sapiens GN=PDCD10 PE=1 SV=1	7	-0.204332	24.6354	WT_GBA - CT	0.00416097	0.0263854	FALSE	no hit	7.21401
PES1	B5MCF9|O00541|O00541-2	Pescadillo homolog OS=Homo sapiens GN=PES1 PE=1 SV=1|Pescadillo homolog OS=Homo sapiens GN=PES1 PE=1 SV=1|Isoform 2 of Pescadillo homolog OS=Homo sapiens GN=PES1	13	0.253481	26.1491	WT_GBA - CT	0.00416182	0.0263854	FALSE	no hit	7.3643
SNAP23	O00161	Synaptosomal-associated protein 23 OS=Homo sapiens GN=SNAP23 PE=1 SV=1	10	-0.291388	25.331	WT_GBA - CT	0.00416272	0.0263854	FALSE	no hit	7.22166
VCP	P55072	Transitional endoplasmic reticulum ATPase OS=Homo sapiens GN=VCP PE=1 SV=4	49	0.184737	28.5604	WT_GBA - CT	0.0041688	0.0263967	FALSE	no hit	8.44651
SEPHS1	P49903	Selenide, water dikinase 1 OS=Homo sapiens GN=SEPHS1 PE=1 SV=2	8	-0.205716	24.0553	WT_GBA - CT	0.00417855	0.0264312	FALSE	no hit	6.99127
UCHL5	Q5LJA5|Q9Y5K5|Q9Y5K5-3	Ubiquitin carboxyl-terminal hydrolase OS=Homo sapiens GN=UCHL5 PE=1 SV=1|Ubiquitin carboxyl-terminal hydrolase isozyme L5 OS=Homo sapiens GN=UCHL5 PE=1 SV=3|Isoform 3 of Ubiquitin carboxyl-terminal hydrolase isozyme L5 OS=Homo sapiens GN=UCHL5	14	-0.16964	26.2069	WT_GBA - CT	0.00419658	0.0265179	FALSE	no hit	7.60743
DNAAF5	Q86Y56	Dynein assembly factor 5, axonemal OS=Homo sapiens GN=DNAAF5 PE=1 SV=4	19	-0.339369	25.6722	WT_GBA - CT	0.00422657	0.0266579	FALSE	no hit	7.33015
METTL1	Q9UBP6	tRNA (guanine-N(7)-)-methyltransferase OS=Homo sapiens GN=METTL1 PE=1 SV=1	6	0.196782	23.8194	WT_GBA - CT	0.00422829	0.0266579	FALSE	no hit	6.81813
EIF5A2	C9J4W5|Q9GZV4	Eukaryotic translation initiation factor 5A (Fragment) OS=Homo sapiens GN=EIF5A2 PE=1 SV=1|Eukaryotic translation initiation factor 5A-2 OS=Homo sapiens GN=EIF5A2 PE=1 SV=3	2	-0.248871	23.0065	WT_GBA - CT	0.00423175	0.0266579	FALSE	no hit	6.22898
SMARCD1	Q96GM5|Q96GM5-2	SWI/SNF-related matrix-associated actin-dependent regulator of chromatin subfamily D member 1 OS=Homo sapiens GN=SMARCD1 PE=1 SV=2|Isoform 2 of SWI/SNF-related matrix-associated actin-dependent regulator of chromatin subfamily D member 1 OS=Homo sapiens GN=SMARCD1	6	0.201153	24.3797	WT_GBA - CT	0.00425517	0.0267779	FALSE	no hit	6.79591
MTDH	H0YBJ8|Q86UE4	Protein LYRIC (Fragment) OS=Homo sapiens GN=MTDH PE=1 SV=1|Protein LYRIC OS=Homo sapiens GN=MTDH PE=1 SV=2	28	0.187604	26.8799	WT_GBA - CT	0.00426245	0.0267963	FALSE	no hit	7.63626
CMBL	Q96DG6	Carboxymethylenebutenolidase homolog OS=Homo sapiens GN=CMBL PE=1 SV=1	6	0.262508	25.1799	WT_GBA - CT	0.00429926	0.0269758	FALSE	no hit	7.71448
METTL17	Q9H7H0|Q9H7H0-2|Q9H7H0-3	Methyltransferase-like protein 17, mitochondrial OS=Homo sapiens GN=METTL17 PE=1 SV=1|Isoform 2 of Methyltransferase-like protein 17, mitochondrial OS=Homo sapiens GN=METTL17|Isoform 3 of Methyltransferase-like protein 17, mitochondrial OS=Homo sapiens GN=METTL17	3	0.302669	22.7296	WT_GBA - CT	0.0042998	0.0269758	FALSE	no hit	6.1782
MYO10	A0A0A0MQX1|Q9HD67	Unconventional myosin-X OS=Homo sapiens GN=MYO10 PE=1 SV=1|Unconventional myosin-X OS=Homo sapiens GN=MYO10 PE=1 SV=3	5	0.234012	22.9311	WT_GBA - CT	0.00430733	0.0269955	FALSE	no hit	6.05565
CCDC47	Q96A33|Q96A33-2	Coiled-coil domain-containing protein 47 OS=Homo sapiens GN=CCDC47 PE=1 SV=1|Isoform 2 of Coiled-coil domain-containing protein 47 OS=Homo sapiens GN=CCDC47	20	0.169107	26.7236	WT_GBA - CT	0.00436086	0.0273031	FALSE	no hit	7.6944
ZNF574	A0A0C4DFM2|Q6ZN55|Q6ZN55-2	HCG1643764, isoform CRA_b OS=Homo sapiens GN=ZNF574 PE=1 SV=1|Zinc finger protein 574 OS=Homo sapiens GN=ZNF574 PE=1 SV=2|Isoform 2 of Zinc finger protein 574 OS=Homo sapiens GN=ZNF574	7	-0.176816	23.2826	WT_GBA - CT	0.00440014	0.0275211	FALSE	no hit	6.59478
BCL10	O95999	B-cell lymphoma/leukemia 10 OS=Homo sapiens GN=BCL10 PE=1 SV=1	6	0.331406	24.7372	WT_GBA - CT	0.00442546	0.0276273	FALSE	no hit	6.72896
MCM3	P25205|P25205-2	DNA replication licensing factor MCM3 OS=Homo sapiens GN=MCM3 PE=1 SV=3|Isoform 2 of DNA replication licensing factor MCM3 OS=Homo sapiens GN=MCM3	36	0.214958	27.5737	WT_GBA - CT	0.00442613	0.0276273	FALSE	no hit	7.95052
SMNDC1	O75940	Survival of motor neuron-related-splicing factor 30 OS=Homo sapiens GN=SMNDC1 PE=1 SV=1	11	-0.306892	25.7204	WT_GBA - CT	0.00443726	0.0276687	FALSE	no hit	7.31563
GTF3C1	Q12789	General transcription factor 3C polypeptide 1 OS=Homo sapiens GN=GTF3C1 PE=1 SV=4	28	0.154741	26.3403	WT_GBA - CT	0.00447428	0.0278712	FALSE	no hit	7.14377
TMED3	Q9Y3Q3	Transmembrane emp24 domain-containing protein 3 OS=Homo sapiens GN=TMED3 PE=1 SV=1	2	0.30276	21.886	WT_GBA - CT	0.00449304	0.0279597	FALSE	no hit	6.57696
MCM7	P33993	DNA replication licensing factor MCM7 OS=Homo sapiens GN=MCM7 PE=1 SV=4	34	0.220913	27.4095	WT_GBA - CT	0.00451668	0.0280784	FALSE	no hit	7.83083
ACADM	B7Z9I1|P11310|P11310-2|Q5T4U5	Medium-chain-specific acyl-CoA dehydrogenase, mitochondrial OS=Homo sapiens GN=ACADM PE=1 SV=1|Medium-chain specific acyl-CoA dehydrogenase, mitochondrial OS=Homo sapiens GN=ACADM PE=1 SV=1|Isoform 2 of Medium-chain specific acyl-CoA dehydrogenase, mitochondrial OS=Homo sapiens GN=ACADM|Acyl-Coenzyme A dehydrogenase, C-4 to C-12 straight chain, isoform CRA_a OS=Homo sapiens GN=ACADM PE=1 SV=1	12	-0.155751	26.3886	WT_GBA - CT	0.00452644	0.0281106	FALSE	no hit	7.47671
STXBP4	Q6ZWJ1	Syntaxin-binding protein 4 OS=Homo sapiens GN=STXBP4 PE=1 SV=2	7	0.194925	24.5409	WT_GBA - CT	0.0045374	0.0281502	FALSE	no hit	6.71495
KIF5B	P33176	Kinesin-1 heavy chain OS=Homo sapiens GN=KIF5B PE=1 SV=1	49	-0.171072	28.1216	WT_GBA - CT	0.00455345	0.0282213	FALSE	no hit	7.76303
PNPO	Q9NVS9|Q9NVS9-2|Q9NVS9-3	Pyridoxine-5'-phosphate oxidase OS=Homo sapiens GN=PNPO PE=1 SV=1|Isoform 2 of Pyridoxine-5'-phosphate oxidase OS=Homo sapiens GN=PNPO|Isoform 3 of Pyridoxine-5'-phosphate oxidase OS=Homo sapiens GN=PNPO	8	-0.25343	24.5854	WT_GBA - CT	0.00456175	0.0282442	FALSE	no hit	7.11983
TMEM57	Q8N5G2	Macoilin OS=Homo sapiens GN=TMEM57 PE=1 SV=1	7	0.215386	24.3174	WT_GBA - CT	0.00456951	0.0282638	FALSE	no hit	6.64055
TMX2	Q9Y320|Q9Y320-2	Thioredoxin-related transmembrane protein 2 OS=Homo sapiens GN=TMX2 PE=1 SV=1|Isoform 2 of Thioredoxin-related transmembrane protein 2 OS=Homo sapiens GN=TMX2	4	0.355114	23.8939	WT_GBA - CT	0.00458659	0.0283259	FALSE	no hit	7.01209
ZNF277	Q9NRM2	Zinc finger protein 277 OS=Homo sapiens GN=ZNF277 PE=1 SV=2	5	0.321248	23.183	WT_GBA - CT	0.00458878	0.0283259	FALSE	no hit	6.3383
ABCB8	Q9NUT2|Q9NUT2-2	ATP-binding cassette sub-family B member 8, mitochondrial OS=Homo sapiens GN=ABCB8 PE=1 SV=3|Isoform 2 of ATP-binding cassette sub-family B member 8, mitochondrial OS=Homo sapiens GN=ABCB8	2	0.222494	21.9008	WT_GBA - CT	0.00461344	0.0284496	FALSE	no hit	5.50283
TMCC1	E9PC87|O94876|O94876-2	Transmembrane and coiled-coil domains protein 1 OS=Homo sapiens GN=TMCC1 PE=1 SV=1|Transmembrane and coiled-coil domains protein 1 OS=Homo sapiens GN=TMCC1 PE=1 SV=3|Isoform 2 of Transmembrane and coiled-coil domains protein 1 OS=Homo sapiens GN=TMCC1	2	-0.293207	21.9666	WT_GBA - CT	0.0046201	0.028462	FALSE	no hit	5.82723
WDR44	Q5JSH3|Q5JSH3-2	WD repeat-containing protein 44 OS=Homo sapiens GN=WDR44 PE=1 SV=1|Isoform 2 of WD repeat-containing protein 44 OS=Homo sapiens GN=WDR44	21	-0.186516	25.838	WT_GBA - CT	0.00463197	0.0285066	FALSE	no hit	6.84071
GMDS	O60547	GDP-mannose 4,6 dehydratase OS=Homo sapiens GN=GMDS PE=1 SV=1	10	0.203002	24.9381	WT_GBA - CT	0.00465262	0.028605	FALSE	no hit	7.30428
TBC1D9B	Q66K14|Q66K14-2	TBC1 domain family member 9B OS=Homo sapiens GN=TBC1D9B PE=1 SV=3|Isoform 2 of TBC1 domain family member 9B OS=Homo sapiens GN=TBC1D9B	14	-0.186814	25.0156	WT_GBA - CT	0.00468162	0.0287545	FALSE	no hit	6.58719
EIF4H	Q15056|Q15056-2	Eukaryotic translation initiation factor 4H OS=Homo sapiens GN=EIF4H PE=1 SV=5|Isoform Short of Eukaryotic translation initiation factor 4H OS=Homo sapiens GN=EIF4H	18	-0.247562	26.7398	WT_GBA - CT	0.00469706	0.0288205	FALSE	no hit	8.12944
VPS29	F8VXU5|Q05DG7|Q9UBQ0|Q9UBQ0-2	Vacuolar protein sorting-associated protein 29 OS=Homo sapiens GN=VPS29 PE=1 SV=1|VPS29 protein OS=Homo sapiens GN=VPS29 PE=1 SV=1|Vacuolar protein sorting-associated protein 29 OS=Homo sapiens GN=VPS29 PE=1 SV=1|Isoform 2 of Vacuolar protein sorting-associated protein 29 OS=Homo sapiens GN=VPS29	5	-0.175838	23.6006	WT_GBA - CT	0.00472294	0.0289504	FALSE	no hit	7.20416
COMMD2	Q86X83|Q86X83-2	COMM domain-containing protein 2 OS=Homo sapiens GN=COMMD2 PE=1 SV=2|Isoform 2 of COMM domain-containing protein 2 OS=Homo sapiens GN=COMMD2	2	0.188293	23.0762	WT_GBA - CT	0.00473552	0.0289986	FALSE	no hit	7.09274
ZSCAN25	A0A0C4DFN0|Q6NSZ9|Q6NSZ9-2	Zinc finger and SCAN domain-containing protein 25 OS=Homo sapiens GN=ZSCAN25 PE=1 SV=1|Zinc finger and SCAN domain-containing protein 25 OS=Homo sapiens GN=ZSCAN25 PE=1 SV=3|Isoform 2 of Zinc finger and SCAN domain-containing protein 25 OS=Homo sapiens GN=ZSCAN25	2	0.450454	22.1216	WT_GBA - CT	0.00474067	0.0290012	FALSE	no hit	6.12776
KLHL22	Q53GT1|Q53GT1-3	Kelch-like protein 22 OS=Homo sapiens GN=KLHL22 PE=1 SV=2|Isoform 2 of Kelch-like protein 22 OS=Homo sapiens GN=KLHL22	4	-0.410827	22.7689	WT_GBA - CT	0.0047706	0.0291552	FALSE	no hit	6.21726
PSPC1	Q8WXF1	Paraspeckle component 1 OS=Homo sapiens GN=PSPC1 PE=1 SV=1	20	-0.160781	26.6629	WT_GBA - CT	0.0047937	0.0292385	FALSE	no hit	7.56618
SHC1	P29353|P29353-2|P29353-6|P29353-7	SHC-transforming protein 1 OS=Homo sapiens GN=SHC1 PE=1 SV=4|Isoform p52Shc of SHC-transforming protein 1 OS=Homo sapiens GN=SHC1|Isoform 6 of SHC-transforming protein 1 OS=Homo sapiens GN=SHC1|Isoform 7 of SHC-transforming protein 1 OS=Homo sapiens GN=SHC1	10	0.162887	23.6947	WT_GBA - CT	0.00479454	0.0292385	FALSE	no hit	6.49709
PALD1	Q9ULE6	Paladin OS=Homo sapiens GN=PALD1 PE=1 SV=3	12	-0.300655	24.6472	WT_GBA - CT	0.00479851	0.0292385	FALSE	no hit	6.70258
RALGPS2	Q86X27|Q86X27-3	Ras-specific guanine nucleotide-releasing factor RalGPS2 OS=Homo sapiens GN=RALGPS2 PE=1 SV=1|Isoform 3 of Ras-specific guanine nucleotide-releasing factor RalGPS2 OS=Homo sapiens GN=RALGPS2	6	0.224769	23.888	WT_GBA - CT	0.00480613	0.0292559	FALSE	no hit	6.54478
RAB6B	Q9NRW1|Q9NRW1-2	Ras-related protein Rab-6B OS=Homo sapiens GN=RAB6B PE=1 SV=1|Isoform 2 of Ras-related protein Rab-6B OS=Homo sapiens GN=RAB6B	3	-0.273213	23.5737	WT_GBA - CT	0.00482223	0.0293249	FALSE	no hit	6.46226
ANP32E	Q9BTT0	Acidic leucine-rich nuclear phosphoprotein 32 family member E OS=Homo sapiens GN=ANP32E PE=1 SV=1	5	-0.201859	23.4983	WT_GBA - CT	0.00482747	0.0293277	FALSE	no hit	7.10555
KDM3A	F5H070|Q9Y4C1	Lysine-specific demethylase 3A OS=Homo sapiens GN=KDM3A PE=1 SV=2|Lysine-specific demethylase 3A OS=Homo sapiens GN=KDM3A PE=1 SV=4	9	0.184136	24.7282	WT_GBA - CT	0.00483432	0.0293403	FALSE	no hit	6.39808
MIA3	Q5JRA6	Melanoma inhibitory activity protein 3 OS=Homo sapiens GN=MIA3 PE=1 SV=1	53	0.185105	27.7749	WT_GBA - CT	0.00483994	0.0293454	FALSE	no hit	7.21594
PLP2	Q04941	Proteolipid protein 2 OS=Homo sapiens GN=PLP2 PE=1 SV=1	2	-0.251404	22.5119	WT_GBA - CT	0.00485409	0.0294022	FALSE	no hit	6.87807
CEP72	Q9P209	Centrosomal protein of 72 kDa OS=Homo sapiens GN=CEP72 PE=1 SV=2	3	0.299186	22.2369	WT_GBA - CT	0.00485994	0.0294086	FALSE	no hit	6.08754
ASUN	Q9NVM9	Protein asunder homolog OS=Homo sapiens GN=ASUN PE=1 SV=2	17	0.165709	25.3909	WT_GBA - CT	0.00486965	0.0294351	FALSE	no hit	7.07089
POLE4	Q9NR33	DNA polymerase epsilon subunit 4 OS=Homo sapiens GN=POLE4 PE=1 SV=2	3	0.271292	22.8917	WT_GBA - CT	0.00487802	0.0294351	FALSE	no hit	6.36068
CRKL	P46109	Crk-like protein OS=Homo sapiens GN=CRKL PE=1 SV=1	15	-0.190956	25.6022	WT_GBA - CT	0.00487869	0.0294351	FALSE	no hit	7.34925
NCAPH	C9J470|Q15003|Q15003-2	Condensin complex subunit 2 (Fragment) OS=Homo sapiens GN=NCAPH PE=1 SV=7|Condensin complex subunit 2 OS=Homo sapiens GN=NCAPH PE=1 SV=3|Isoform 2 of Condensin complex subunit 2 OS=Homo sapiens GN=NCAPH	23	-0.160891	26.6695	WT_GBA - CT	0.00489443	0.0295011	FALSE	no hit	7.37836
SURF4	O15260|O15260-2|Q5T8U5	Surfeit locus protein 4 OS=Homo sapiens GN=SURF4 PE=1 SV=3|Isoform 2 of Surfeit locus protein 4 OS=Homo sapiens GN=SURF4|Surfeit 4 OS=Homo sapiens GN=SURF4 PE=1 SV=1	3	0.22933	25.053	WT_GBA - CT	0.00492501	0.0296563	FALSE	no hit	6.93532
SEC24C	A0A0U1RR49|P53992	Protein transport protein Sec24C (Fragment) OS=Homo sapiens GN=SEC24C PE=1 SV=1|Protein transport protein Sec24C OS=Homo sapiens GN=SEC24C PE=1 SV=3	24	0.236651	25.9573	WT_GBA - CT	0.00493038	0.0296596	FALSE	no hit	7.40423
RTN3	O95197|O95197-2|O95197-7	Reticulon-3 OS=Homo sapiens GN=RTN3 PE=1 SV=2|Isoform 2 of Reticulon-3 OS=Homo sapiens GN=RTN3|Isoform 7 of Reticulon-3 OS=Homo sapiens GN=RTN3	5	-0.174229	23.3908	WT_GBA - CT	0.00500061	0.0300083	FALSE	no hit	7.43349
PCGF5	Q86SE9	Polycomb group RING finger protein 5 OS=Homo sapiens GN=PCGF5 PE=1 SV=1	2	0.248245	22.1901	WT_GBA - CT	0.005001	0.0300083	FALSE	no hit	6.3956
OTUD5	Q96G74|Q96G74-3|Q96G74-5	OTU domain-containing protein 5 OS=Homo sapiens GN=OTUD5 PE=1 SV=1|Isoform 3 of OTU domain-containing protein 5 OS=Homo sapiens GN=OTUD5|Isoform 5 of OTU domain-containing protein 5 OS=Homo sapiens GN=OTUD5	9	0.251057	24.8564	WT_GBA - CT	0.00500301	0.0300083	FALSE	no hit	7.16563
STRN4	Q9NRL3|Q9NRL3-3	Striatin-4 OS=Homo sapiens GN=STRN4 PE=1 SV=2|Isoform 3 of Striatin-4 OS=Homo sapiens GN=STRN4	13	-0.155744	24.7904	WT_GBA - CT	0.00504596	0.0302197	FALSE	no hit	7.0784
STAMBPL1	Q96FJ0|Q96FJ0-2	AMSH-like protease OS=Homo sapiens GN=STAMBPL1 PE=1 SV=2|Isoform 2 of AMSH-like protease OS=Homo sapiens GN=STAMBPL1	5	0.198262	23.5683	WT_GBA - CT	0.0050507	0.0302197	FALSE	no hit	6.14363
MED20	A0A087X1F4|Q9H944	Mediator of RNA polymerase II transcription subunit 20 OS=Homo sapiens GN=MED20 PE=1 SV=1|Mediator of RNA polymerase II transcription subunit 20 OS=Homo sapiens GN=MED20 PE=1 SV=1	5	0.166839	24.7048	WT_GBA - CT	0.00505301	0.0302197	FALSE	no hit	6.69804
DNAJC9	Q8WXX5	DnaJ homolog subfamily C member 9 OS=Homo sapiens GN=DNAJC9 PE=1 SV=1	13	-0.251772	26.3207	WT_GBA - CT	0.00510673	0.0305112	FALSE	no hit	7.8818
RPP40	O75818|O75818-2	Ribonuclease P protein subunit p40 OS=Homo sapiens GN=RPP40 PE=1 SV=3|Isoform 2 of Ribonuclease P protein subunit p40 OS=Homo sapiens GN=RPP40	5	0.287079	23.5911	WT_GBA - CT	0.00512274	0.0305771	FALSE	no hit	6.65946
EIF2B2	P49770	Translation initiation factor eIF-2B subunit beta OS=Homo sapiens GN=EIF2B2 PE=1 SV=3	9	0.233275	25.7326	WT_GBA - CT	0.00516559	0.0308029	FALSE	no hit	7.19469
ARL2BP	H3BU49|Q9Y2Y0|Q9Y2Y0-2	ADP-ribosylation factor-like protein 2-binding protein OS=Homo sapiens GN=ARL2BP PE=1 SV=1|ADP-ribosylation factor-like protein 2-binding protein OS=Homo sapiens GN=ARL2BP PE=1 SV=1|Isoform 2 of ADP-ribosylation factor-like protein 2-binding protein OS=Homo sapiens GN=ARL2BP	2	-0.39084	22.7404	WT_GBA - CT	0.00518885	0.0309117	FALSE	no hit	6.80235
RBM28	Q9NW13	RNA-binding protein 28 OS=Homo sapiens GN=RBM28 PE=1 SV=3	21	0.229701	26.6093	WT_GBA - CT	0.00520059	0.0309516	FALSE	no hit	7.52961
SUPT16H	Q9Y5B9	FACT complex subunit SPT16 OS=Homo sapiens GN=SUPT16H PE=1 SV=1	23	-0.310869	27.0853	WT_GBA - CT	0.00522428	0.0310625	FALSE	no hit	7.63899
DPH5	A0A087WXP7|Q9H2P9|Q9H2P9-2|Q9H2P9-3|Q9H2P9-4|Q9H2P9-5	Diphthine methyl ester synthase OS=Homo sapiens GN=DPH5 PE=1 SV=1|Diphthine methyl ester synthase OS=Homo sapiens GN=DPH5 PE=1 SV=2|Isoform 2 of Diphthine methyl ester synthase OS=Homo sapiens GN=DPH5|Isoform 3 of Diphthine methyl ester synthase OS=Homo sapiens GN=DPH5|Isoform 4 of Diphthine methyl ester synthase OS=Homo sapiens GN=DPH5|Isoform 5 of Diphthine methyl ester synthase OS=Homo sapiens…	7	0.201493	24.8176	WT_GBA - CT	0.0052316	0.0310759	FALSE	no hit	7.28521
RABGEF1	E9PFK9|Q9UJ41|Q9UJ41-2|Q9UJ41-3|Q9UJ41-4	Rab5 GDP/GTP exchange factor OS=Homo sapiens GN=RABGEF1 PE=1 SV=1|Rab5 GDP/GTP exchange factor OS=Homo sapiens GN=RABGEF1 PE=1 SV=2|Isoform 2 of Rab5 GDP/GTP exchange factor OS=Homo sapiens GN=RABGEF1|Isoform 3 of Rab5 GDP/GTP exchange factor OS=Homo sapiens GN=RABGEF1|Isoform 4 of Rab5 GDP/GTP exchange factor OS=Homo sapiens GN=RABGEF1	9	0.186339	24.8086	WT_GBA - CT	0.00526037	0.0312166	FALSE	no hit	6.563
HARS2	P49590	Probable histidine--tRNA ligase, mitochondrial OS=Homo sapiens GN=HARS2 PE=1 SV=1	10	0.189774	25.6356	WT_GBA - CT	0.00527911	0.0312976	FALSE	no hit	7.32536
ARID3B	Q8IVW6|Q8IVW6-4	AT-rich interactive domain-containing protein 3B OS=Homo sapiens GN=ARID3B PE=1 SV=2|Isoform 4 of AT-rich interactive domain-containing protein 3B OS=Homo sapiens GN=ARID3B	10	0.178667	25.0165	WT_GBA - CT	0.00529217	0.0313448	FALSE	no hit	6.76613
LSM1	O15116	U6 snRNA-associated Sm-like protein LSm1 OS=Homo sapiens GN=LSM1 PE=1 SV=1	4	-0.423421	23.5328	WT_GBA - CT	0.00530939	0.0314165	FALSE	no hit	6.91897
RPN1	P04843	Dolichyl-diphosphooligosaccharide--protein glycosyltransferase subunit 1 OS=Homo sapiens GN=RPN1 PE=1 SV=1	33	0.155361	27.6565	WT_GBA - CT	0.00531466	0.0314174	FALSE	no hit	8.05865
AKAP11	Q9UKA4	A-kinase anchor protein 11 OS=Homo sapiens GN=AKAP11 PE=1 SV=1	6	-0.273225	23.7462	WT_GBA - CT	0.00532549	0.0314511	FALSE	no hit	6.14323
OARD1	C9JNE2|C9JXC3|Q9Y530	O-acetyl-ADP-ribose deacetylase 1 (Fragment) OS=Homo sapiens GN=OARD1 PE=1 SV=1|O-acetyl-ADP-ribose deacetylase 1 OS=Homo sapiens GN=OARD1 PE=1 SV=1|O-acetyl-ADP-ribose deacetylase 1 OS=Homo sapiens GN=OARD1 PE=1 SV=2	3	0.18803	23.1301	WT_GBA - CT	0.00533553	0.0314563	FALSE	no hit	6.16219
TUBGCP6	Q96RT7|Q96RT7-2|Q96RT7-3	Gamma-tubulin complex component 6 OS=Homo sapiens GN=TUBGCP6 PE=1 SV=3|Isoform 2 of Gamma-tubulin complex component 6 OS=Homo sapiens GN=TUBGCP6|Isoform 3 of Gamma-tubulin complex component 6 OS=Homo sapiens GN=TUBGCP6	5	-0.238264	23.2956	WT_GBA - CT	0.00533661	0.0314563	FALSE	no hit	6.53925
RPRD1A	Q96P16	Regulation of nuclear pre-mRNA domain-containing protein 1A OS=Homo sapiens GN=RPRD1A PE=1 SV=1	11	-0.173934	25.5732	WT_GBA - CT	0.00534245	0.0314605	FALSE	no hit	6.88961
TBC1D22B	Q9NU19	TBC1 domain family member 22B OS=Homo sapiens GN=TBC1D22B PE=1 SV=3	2	0.254457	22.203	WT_GBA - CT	0.00535434	0.0315003	FALSE	no hit	6.09216
KBTBD11	O94819	Kelch repeat and BTB domain-containing protein 11 OS=Homo sapiens GN=KBTBD11 PE=1 SV=1	4	-0.212987	23.0293	WT_GBA - CT	0.00536933	0.0315583	FALSE	no hit	6.26944
U2SURP	E7ET15|O15042|O15042-2	Isoform 2 of U2 snRNP-associated SURP motif-containing protein OS=Homo sapiens GN=U2SURP|U2 snRNP-associated SURP motif-containing protein OS=Homo sapiens GN=U2SURP PE=1 SV=1|U2 snRNP-associated SURP motif-containing protein OS=Homo sapiens GN=U2SURP PE=1 SV=2	26	-0.157821	26.9349	WT_GBA - CT	0.00537624	0.0315687	FALSE	no hit	7.55503
NDUFS8	E9PPW7|O00217	NADH dehydrogenase [ubiquinone] iron-sulfur protein 8, mitochondrial (Fragment) OS=Homo sapiens GN=NDUFS8 PE=1 SV=1|NADH dehydrogenase [ubiquinone] iron-sulfur protein 8, mitochondrial OS=Homo sapiens GN=NDUFS8 PE=1 SV=1	5	0.353342	25.5094	WT_GBA - CT	0.0053868	0.0316005	FALSE	no hit	6.80261
MRPL10	Q7Z7H8|Q7Z7H8-2	39S ribosomal protein L10, mitochondrial OS=Homo sapiens GN=MRPL10 PE=1 SV=3|Isoform 2 of 39S ribosomal protein L10, mitochondrial OS=Homo sapiens GN=MRPL10	4	0.17037	24.0252	WT_GBA - CT	0.00539751	0.031603	FALSE	no hit	6.90922
STX2	P32856|P32856-2|P32856-3	Syntaxin-2 OS=Homo sapiens GN=STX2 PE=2 SV=3|Isoform 1 of Syntaxin-2 OS=Homo sapiens GN=STX2|Isoform 2 of Syntaxin-2 OS=Homo sapiens GN=STX2	4	-0.194329	23.51	WT_GBA - CT	0.00539752	0.031603	FALSE	no hit	6.39057
DIAPH1	A0A0G2JH68	Protein diaphanous homolog 1 OS=Homo sapiens GN=DIAPH1 PE=1 SV=1	42	0.193376	27.7561	WT_GBA - CT	0.00540969	0.0316441	FALSE	no hit	7.81506
SGTB	D6RFW1|Q96EQ0	Small glutamine-rich tetratricopeptide repeat-containing protein beta (Fragment) OS=Homo sapiens GN=SGTB PE=1 SV=1|Small glutamine-rich tetratricopeptide repeat-containing protein beta OS=Homo sapiens GN=SGTB PE=1 SV=1	5	-0.235244	24.3626	WT_GBA - CT	0.00543598	0.0317448	FALSE	no hit	6.80557
CCDC25	Q86WR0	Coiled-coil domain-containing protein 25 OS=Homo sapiens GN=CCDC25 PE=1 SV=2	8	-0.274155	25.2829	WT_GBA - CT	0.00544213	0.0317448	FALSE	no hit	7.39334
FAM134C	Q86VR2	Protein FAM134C OS=Homo sapiens GN=FAM134C PE=1 SV=1	5	-0.224938	24.0848	WT_GBA - CT	0.00544242	0.0317448	FALSE	no hit	7.10479
TRIM32	Q13049	E3 ubiquitin-protein ligase TRIM32 OS=Homo sapiens GN=TRIM32 PE=1 SV=2	7	-0.17462	23.8672	WT_GBA - CT	0.00545649	0.0317819	FALSE	no hit	6.32764
VPS72	Q15906|Q15906-2	Vacuolar protein sorting-associated protein 72 homolog OS=Homo sapiens GN=VPS72 PE=1 SV=1|Isoform 2 of Vacuolar protein sorting-associated protein 72 homolog OS=Homo sapiens GN=VPS72	5	0.194016	23.6055	WT_GBA - CT	0.00546029	0.0317819	FALSE	no hit	6.84883
HM13	Q8TCT9|Q8TCT9-5	Minor histocompatibility antigen H13 OS=Homo sapiens GN=HM13 PE=1 SV=1|Isoform 5 of Minor histocompatibility antigen H13 OS=Homo sapiens GN=HM13	7	0.243468	25.7196	WT_GBA - CT	0.00546429	0.0317819	FALSE	no hit	7.85652
TERF2	Q15554	Telomeric repeat-binding factor 2 OS=Homo sapiens GN=TERF2 PE=1 SV=3	14	-0.166406	25.3523	WT_GBA - CT	0.00547447	0.0318109	FALSE	no hit	6.70292
SEPT7	Q16181	Septin-7 OS=Homo sapiens GN=SEPT7 PE=1 SV=2	20	-0.161715	26.9909	WT_GBA - CT	0.00549958	0.0319267	FALSE	no hit	8.21975
PROSC	O94903	Proline synthase co-transcribed bacterial homolog protein OS=Homo sapiens GN=PROSC PE=1 SV=1	7	-0.174551	24.5826	WT_GBA - CT	0.0055055	0.0319308	FALSE	no hit	7.38074
FOXRED1	Q96CU9	FAD-dependent oxidoreductase domain-containing protein 1 OS=Homo sapiens GN=FOXRED1 PE=1 SV=2	6	0.161974	23.9856	WT_GBA - CT	0.00551856	0.0319621	FALSE	no hit	6.70543
CNOT6L	H0Y9C1|H0Y9Z5|Q96LI5	CCR4-NOT transcription complex subunit 6-like (Fragment) OS=Homo sapiens GN=CNOT6L PE=1 SV=1|CCR4-NOT transcription complex subunit 6-like (Fragment) OS=Homo sapiens GN=CNOT6L PE=1 SV=1|CCR4-NOT transcription complex subunit 6-like OS=Homo sapiens GN=CNOT6L PE=1 SV=2	3	0.249682	22.5065	WT_GBA - CT	0.00552129	0.0319621	FALSE	no hit	5.8229
QPCTL	Q9NXS2|Q9NXS2-3	Glutaminyl-peptide cyclotransferase-like protein OS=Homo sapiens GN=QPCTL PE=1 SV=2|Isoform 2 of Glutaminyl-peptide cyclotransferase-like protein OS=Homo sapiens GN=QPCTL	3	0.237435	22.6409	WT_GBA - CT	0.00556726	0.0321979	FALSE	no hit	6.28612
GTF2E2	P29084	Transcription initiation factor IIE subunit beta OS=Homo sapiens GN=GTF2E2 PE=1 SV=1	9	-0.271589	25.3693	WT_GBA - CT	0.00558508	0.0322455	FALSE	no hit	6.9762
SEC61A1	B4DR61|P61619	Protein transport protein Sec61 subunit alpha isoform 1 OS=Homo sapiens GN=SEC61A1 PE=1 SV=1|Protein transport protein Sec61 subunit alpha isoform 1 OS=Homo sapiens GN=SEC61A1 PE=1 SV=2	4	0.169157	23.7362	WT_GBA - CT	0.00558599	0.0322455	FALSE	no hit	7.36104
UBE2G2	P60604	Ubiquitin-conjugating enzyme E2 G2 OS=Homo sapiens GN=UBE2G2 PE=1 SV=1	4	0.242964	24.0783	WT_GBA - CT	0.00561369	0.0323556	FALSE	no hit	6.85825
ITFG2	Q969R8	Integrin-alpha FG-GAP repeat-containing protein 2 OS=Homo sapiens GN=ITFG2 PE=1 SV=1	2	0.195109	22.2278	WT_GBA - CT	0.00561561	0.0323556	FALSE	no hit	6.05266
CC2D1B	Q5T0F9-2	Isoform 2 of Coiled-coil and C2 domain-containing protein 1B OS=Homo sapiens GN=CC2D1B	12	0.172844	25.3085	WT_GBA - CT	0.00564633	0.0325021	FALSE	no hit	6.67336
ISYNA1	Q9NPH2	Inositol-3-phosphate synthase 1 OS=Homo sapiens GN=ISYNA1 PE=1 SV=1	13	-0.285866	25.9567	WT_GBA - CT	0.00565257	0.0325075	FALSE	no hit	7.84216
HERC5	Q9UII4	E3 ISG15--protein ligase HERC5 OS=Homo sapiens GN=HERC5 PE=1 SV=2	9	-0.208343	24.3561	WT_GBA - CT	0.00565812	0.032509	FALSE	no hit	6.48474
KTN1	Q86UP2	Kinectin OS=Homo sapiens GN=KTN1 PE=1 SV=1	85	0.172034	28.9012	WT_GBA - CT	0.00567128	0.0325542	FALSE	no hit	7.68417
GPAA1	E9PLV6|E9PPZ9|O43292	Glycosylphosphatidylinositol anchor attachment 1 protein OS=Homo sapiens GN=GPAA1 PE=1 SV=1|Glycosylphosphatidylinositol anchor attachment 1 protein (Fragment) OS=Homo sapiens GN=GPAA1 PE=1 SV=1|Glycosylphosphatidylinositol anchor attachment 1 protein OS=Homo sapiens GN=GPAA1 PE=1 SV=3	3	0.191056	22.8529	WT_GBA - CT	0.00570139	0.0326965	FALSE	no hit	6.42842
EYA4	E7ESD5|E9PLN6|F2Z2Y1|O95677|O95677-2|O95677-4|O95677-5	Eyes absent homolog OS=Homo sapiens GN=EYA4 PE=1 SV=1|Eyes absent homolog OS=Homo sapiens GN=EYA4 PE=1 SV=1|Eyes absent homolog OS=Homo sapiens GN=EYA4 PE=1 SV=1|Eyes absent homolog 4 OS=Homo sapiens GN=EYA4 PE=1 SV=2|Isoform 2 of Eyes absent homolog 4 OS=Homo sapiens GN=EYA4|Isoform 4 of Eyes absent homolog 4 OS=Homo sapiens GN=EYA4|Isoform 5 of Eyes absent homolog 4 OS=Homo sapiens GN=EYA4	2	0.243023	23.0183	WT_GBA - CT	0.00572419	0.0327852	FALSE	no hit	6.2061
UNC13B	B1AM27|O14795|O14795-2	Protein unc-13 homolog B OS=Homo sapiens GN=UNC13B PE=1 SV=1|Protein unc-13 homolog B OS=Homo sapiens GN=UNC13B PE=1 SV=2|Isoform 2 of Protein unc-13 homolog B OS=Homo sapiens GN=UNC13B	2	0.327442	21.3881	WT_GBA - CT	0.00572754	0.0327852	FALSE	no hit	5.82354
LARP4	Q71RC2|Q71RC2-4|Q71RC2-5	La-related protein 4 OS=Homo sapiens GN=LARP4 PE=1 SV=3|Isoform 4 of La-related protein 4 OS=Homo sapiens GN=LARP4|Isoform 5 of La-related protein 4 OS=Homo sapiens GN=LARP4	14	0.161534	25.7447	WT_GBA - CT	0.00578438	0.0330798	FALSE	no hit	6.94585
STMN1	P16949	Stathmin OS=Homo sapiens GN=STMN1 PE=1 SV=3	13	-0.346259	27.5009	WT_GBA - CT	0.0058045	0.0331639	FALSE	no hit	8.36785
ZNHIT3	Q15649	Zinc finger HIT domain-containing protein 3 OS=Homo sapiens GN=ZNHIT3 PE=1 SV=2	4	0.282665	23.7175	WT_GBA - CT	0.00581766	0.0332082	FALSE	no hit	6.42885
MTUS1	Q9ULD2-2	Isoform 2 of Microtubule-associated tumor suppressor 1 OS=Homo sapiens GN=MTUS1	2	-0.178202	22.3311	WT_GBA - CT	0.00582765	0.0332344	FALSE	no hit	6.03281
MCM6	Q14566	DNA replication licensing factor MCM6 OS=Homo sapiens GN=MCM6 PE=1 SV=1	40	0.2035	27.9299	WT_GBA - CT	0.00587077	0.0334492	FALSE	no hit	7.9137
NDUFAF3	Q9BU61	NADH dehydrogenase [ubiquinone] 1 alpha subcomplex assembly factor 3 OS=Homo sapiens GN=NDUFAF3 PE=1 SV=1	5	0.215778	24.0226	WT_GBA - CT	0.00590088	0.0335896	FALSE	no hit	7.30095
NCAPG	Q9BPX3	Condensin complex subunit 3 OS=Homo sapiens GN=NCAPG PE=1 SV=1	23	-0.161432	26.6768	WT_GBA - CT	0.00591786	0.0336551	FALSE	no hit	7.51775
NAGK	H7C3G9|Q9UJ70|Q9UJ70-2	N-acetyl-D-glucosamine kinase OS=Homo sapiens GN=NAGK PE=1 SV=2|N-acetyl-D-glucosamine kinase OS=Homo sapiens GN=NAGK PE=1 SV=4|Isoform 2 of N-acetyl-D-glucosamine kinase OS=Homo sapiens GN=NAGK	8	-0.238467	24.6105	WT_GBA - CT	0.00592476	0.0336631	FALSE	no hit	6.83278
CCDC115	Q96NT0	Coiled-coil domain-containing protein 115 OS=Homo sapiens GN=CCDC115 PE=1 SV=1	3	0.371308	22.4733	WT_GBA - CT	0.00595415	0.0337729	FALSE	no hit	6.25268
FAM188A	Q9H8M7	Protein FAM188A OS=Homo sapiens GN=FAM188A PE=1 SV=1	4	-0.153038	23.4589	WT_GBA - CT	0.00595707	0.0337729	FALSE	no hit	6.55991
KIF13B	Q9NQT8	Kinesin-like protein KIF13B OS=Homo sapiens GN=KIF13B PE=1 SV=2	5	-0.201639	22.9664	WT_GBA - CT	0.00596056	0.0337729	FALSE	no hit	6.11443
ARSA	A0A0C4DFZ2|P15289	Arylsulfatase A OS=Homo sapiens GN=ARSA PE=1 SV=1|Arylsulfatase A OS=Homo sapiens GN=ARSA PE=1 SV=3	2	0.534114	20.7573	WT_GBA - CT	0.00598335	0.0338604	FALSE	no hit	5.85572
ESYT2	A0A087WXU3|A0FGR8|A0FGR8-2|A0FGR8-6|H7BXI1	Extended synaptotagmin-2 (Fragment) OS=Homo sapiens GN=ESYT2 PE=1 SV=1|Extended synaptotagmin-2 OS=Homo sapiens GN=ESYT2 PE=1 SV=1|Isoform 2 of Extended synaptotagmin-2 OS=Homo sapiens GN=ESYT2|Isoform 6 of Extended synaptotagmin-2 OS=Homo sapiens GN=ESYT2	20	0.159852	26.0824	WT_GBA - CT	0.00598704	0.0338604	FALSE	no hit	7.39163
HEATR5A	F5H619|H7C5W6|Q86XA9|Q86XA9-2	HEAT repeat-containing protein 5A OS=Homo sapiens GN=HEATR5A PE=1 SV=1|HEAT repeat-containing protein 5A (Fragment) OS=Homo sapiens GN=HEATR5A PE=1 SV=1|HEAT repeat-containing protein 5A OS=Homo sapiens GN=HEATR5A PE=1 SV=2|Isoform 2 of HEAT repeat-containing protein 5A OS=Homo sapiens GN=HEATR5A	3	0.270231	22.355	WT_GBA - CT	0.0060032	0.0339011	FALSE	no hit	5.8341
CCDC9	Q9Y3X0	Coiled-coil domain-containing protein 9 OS=Homo sapiens GN=CCDC9 PE=1 SV=1	5	-0.267306	23.9674	WT_GBA - CT	0.00600528	0.0339011	FALSE	no hit	6.70472
GTPBP4	Q9BZE4	Nucleolar GTP-binding protein 1 OS=Homo sapiens GN=GTPBP4 PE=1 SV=3	25	-0.199487	26.67	WT_GBA - CT	0.00601968	0.0339512	FALSE	no hit	7.42007
DDX11	Q96FC9-2|Q96FC9-3	Isoform 2 of Probable ATP-dependent DNA helicase DDX11 OS=Homo sapiens GN=DDX11|Isoform 3 of Probable ATP-dependent DNA helicase DDX11 OS=Homo sapiens GN=DDX11	4	0.192534	23.5069	WT_GBA - CT	0.00603024	0.0339686	FALSE	no hit	6.36866
ARFGEF1	Q9Y6D6	Brefeldin A-inhibited guanine nucleotide-exchange protein 1 OS=Homo sapiens GN=ARFGEF1 PE=1 SV=2	9	-0.224209	24.1323	WT_GBA - CT	0.00603383	0.0339686	FALSE	no hit	6.53905
NUP205	Q92621	Nuclear pore complex protein Nup205 OS=Homo sapiens GN=NUP205 PE=1 SV=3	35	0.142946	27.3287	WT_GBA - CT	0.00605427	0.034043	FALSE	no hit	8.01688
NUDCD1	Q96RS6|Q96RS6-2|Q96RS6-3	NudC domain-containing protein 1 OS=Homo sapiens GN=NUDCD1 PE=1 SV=2|Isoform 2 of NudC domain-containing protein 1 OS=Homo sapiens GN=NUDCD1|Isoform 3 of NudC domain-containing protein 1 OS=Homo sapiens GN=NUDCD1	7	-0.159886	24.8921	WT_GBA - CT	0.00605864	0.034043	FALSE	no hit	7.16847
PRKD1	Q15139	Serine/threonine-protein kinase D1 OS=Homo sapiens GN=PRKD1 PE=1 SV=2	2	-0.377467	21.2008	WT_GBA - CT	0.00606367	0.034043	FALSE	no hit	5.99285
MBD2	Q9UBB5	Methyl-CpG-binding domain protein 2 OS=Homo sapiens GN=MBD2 PE=1 SV=1	5	-0.175535	23.2092	WT_GBA - CT	0.00608296	0.0340917	FALSE	no hit	6.23844
DHFR	P00374	Dihydrofolate reductase OS=Homo sapiens GN=DHFR PE=1 SV=2	10	0.203757	26.074	WT_GBA - CT	0.00608343	0.0340917	FALSE	no hit	7.63539
GBE1	Q04446	1,4-alpha-glucan-branching enzyme OS=Homo sapiens GN=GBE1 PE=1 SV=3	11	-0.294873	25.2613	WT_GBA - CT	0.00609367	0.0340978	FALSE	no hit	6.77525
TPMT	P51580	Thiopurine S-methyltransferase OS=Homo sapiens GN=TPMT PE=1 SV=1	5	0.153776	24.0844	WT_GBA - CT	0.00610086	0.0340978	FALSE	no hit	6.66574
CDH2	P19022	Cadherin-2 OS=Homo sapiens GN=CDH2 PE=1 SV=4	10	0.206617	24.4961	WT_GBA - CT	0.00610118	0.0340978	FALSE	no hit	6.9018
SNRPD1	P62314	Small nuclear ribonucleoprotein Sm D1 OS=Homo sapiens GN=SNRPD1 PE=1 SV=1	2	-0.178132	22.7057	WT_GBA - CT	0.00612141	0.0341675	FALSE	no hit	7.65374
SAMD1	Q6SPF0	Atherin OS=Homo sapiens GN=SAMD1 PE=1 SV=1	4	-0.209713	23.2041	WT_GBA - CT	0.00612731	0.0341675	FALSE	no hit	6.54376
ATF1	P18846	Cyclic AMP-dependent transcription factor ATF-1 OS=Homo sapiens GN=ATF1 PE=1 SV=2	3	-0.179963	23.0673	WT_GBA - CT	0.00613106	0.0341675	FALSE	no hit	6.30027
FRYL	O94915	Protein furry homolog-like OS=Homo sapiens GN=FRYL PE=1 SV=2	4	-0.217669	23.3428	WT_GBA - CT	0.00613591	0.0341675	FALSE	no hit	6.21259
DDAH1	O94760	N(G),N(G)-dimethylarginine dimethylaminohydrolase 1 OS=Homo sapiens GN=DDAH1 PE=1 SV=3	13	-0.145527	26.1841	WT_GBA - CT	0.00615747	0.0342565	FALSE	no hit	7.60027
ABHD16A	A0A0G2JJD3|O95870|O95870-2	HLA-B associated transcript 5, isoform CRA_b OS=Homo sapiens GN=ABHD16A PE=1 SV=1|Protein ABHD16A OS=Homo sapiens GN=ABHD16A PE=1 SV=3|Isoform 2 of Protein ABHD16A OS=Homo sapiens GN=ABHD16A	7	0.188836	23.8542	WT_GBA - CT	0.00618031	0.0343525	FALSE	no hit	6.66895
UPF2	Q9HAU5	Regulator of nonsense transcripts 2 OS=Homo sapiens GN=UPF2 PE=1 SV=1	18	0.215186	26.1355	WT_GBA - CT	0.00621851	0.0345336	FALSE	no hit	6.88737
SLC7A1	P30825	High affinity cationic amino acid transporter 1 OS=Homo sapiens GN=SLC7A1 PE=1 SV=1	3	0.198875	22.4844	WT_GBA - CT	0.00625736	0.0347179	FALSE	no hit	6.29427
ATP13A1	Q9HD20	Manganese-transporting ATPase 13A1 OS=Homo sapiens GN=ATP13A1 PE=1 SV=2	13	0.259529	25.2182	WT_GBA - CT	0.00628295	0.0348284	FALSE	no hit	6.86768
FBRS	J3KNZ9	Probable fibrosin-1 OS=Homo sapiens GN=FBRS PE=1 SV=1	11	0.190615	24.9035	WT_GBA - CT	0.00634759	0.035155	FALSE	no hit	6.8058
TOMM5	F8W8Z9|Q8N4H5|Q8N4H5-2|Q8N4H5-3	Mitochondrial import receptor subunit TOM5 homolog OS=Homo sapiens GN=TOMM5 PE=1 SV=1|Mitochondrial import receptor subunit TOM5 homolog OS=Homo sapiens GN=TOMM5 PE=1 SV=1|Isoform 2 of Mitochondrial import receptor subunit TOM5 homolog OS=Homo sapiens GN=TOMM5|Isoform 3 of Mitochondrial import receptor subunit TOM5 homolog OS=Homo sapiens GN=TOMM5	2	-0.977824	23.2935	WT_GBA - CT	0.00637042	0.0352497	FALSE	candidate	6.80447
NBAS	A2RRP1	Neuroblastoma-amplified sequence OS=Homo sapiens GN=NBAS PE=1 SV=2	11	0.185696	24.9298	WT_GBA - CT	0.00641178	0.0354466	FALSE	no hit	6.57681
DDX46	Q7L014	Probable ATP-dependent RNA helicase DDX46 OS=Homo sapiens GN=DDX46 PE=1 SV=2	49	-0.221291	28.1455	WT_GBA - CT	0.00642576	0.0354919	FALSE	no hit	7.92713
CXXC1	Q9P0U4|Q9P0U4-2	CXXC-type zinc finger protein 1 OS=Homo sapiens GN=CXXC1 PE=1 SV=2|Isoform 2 of CXXC-type zinc finger protein 1 OS=Homo sapiens GN=CXXC1	9	0.234409	24.0872	WT_GBA - CT	0.00645646	0.0356256	FALSE	no hit	6.56437
HDHD2	Q9H0R4	Haloacid dehalogenase-like hydrolase domain-containing protein 2 OS=Homo sapiens GN=HDHD2 PE=1 SV=1	6	-0.190261	24.6427	WT_GBA - CT	0.00646156	0.0356256	FALSE	no hit	7.09186
PCM1	E7ETA6|Q15154	Pericentriolar material 1 protein OS=Homo sapiens GN=PCM1 PE=1 SV=1|Pericentriolar material 1 protein OS=Homo sapiens GN=PCM1 PE=1 SV=4	44	-0.153299	27.2829	WT_GBA - CT	0.00652322	0.0359027	FALSE	no hit	7.20109
SHKBP1	M0R2P6|Q8TBC3	SH3KBP1 binding protein 1, isoform CRA_c OS=Homo sapiens GN=SHKBP1 PE=1 SV=1|SH3KBP1-binding protein 1 OS=Homo sapiens GN=SHKBP1 PE=1 SV=2	6	-0.212768	23.8002	WT_GBA - CT	0.00652352	0.0359027	FALSE	no hit	6.64429
RNPEP	Q9H4A4	Aminopeptidase B OS=Homo sapiens GN=RNPEP PE=1 SV=2	20	-0.163262	26.1951	WT_GBA - CT	0.00653984	0.0359603	FALSE	no hit	7.39043
API5	G3V1C3|Q9BZZ5|Q9BZZ5-2	Apoptosis inhibitor 5 OS=Homo sapiens GN=API5 PE=1 SV=1|Apoptosis inhibitor 5 OS=Homo sapiens GN=API5 PE=1 SV=3|Isoform 2 of Apoptosis inhibitor 5 OS=Homo sapiens GN=API5	19	-0.157577	26.3794	WT_GBA - CT	0.00655298	0.0359913	FALSE	no hit	7.72143
UBE2N	P61088	Ubiquitin-conjugating enzyme E2 N OS=Homo sapiens GN=UBE2N PE=1 SV=1	3	-0.192805	24.6135	WT_GBA - CT	0.00655719	0.0359913	FALSE	no hit	6.66087
PUSL1	Q8N0Z8	tRNA pseudouridine synthase-like 1 OS=Homo sapiens GN=PUSL1 PE=1 SV=1	3	0.602755	20.755	WT_GBA - CT	0.00657603	0.0360326	FALSE	candidate	5.91243
TBL2	E9PF19|Q9Y4P3	Transducin beta-like protein 2 OS=Homo sapiens GN=TBL2 PE=1 SV=1|Transducin beta-like protein 2 OS=Homo sapiens GN=TBL2 PE=1 SV=1	13	0.200901	25.5691	WT_GBA - CT	0.00657646	0.0360326	FALSE	no hit	6.99152
CYB5A	P00167|P00167-2	Cytochrome b5 OS=Homo sapiens GN=CYB5A PE=1 SV=2|Isoform 2 of Cytochrome b5 OS=Homo sapiens GN=CYB5A	4	-0.228557	23.9951	WT_GBA - CT	0.00658868	0.0360674	FALSE	no hit	7.50943
COMMD3	Q9UBI1|R4GMX3	COMM domain-containing protein 3 OS=Homo sapiens GN=COMMD3 PE=1 SV=1|Protein COMMD3-BMI1 OS=Homo sapiens GN=COMMD3-BMI1 PE=4 SV=1	11	0.227692	24.9854	WT_GBA - CT	0.00661658	0.0361824	FALSE	no hit	6.63746
SPATA5L1	Q9BVQ7	Spermatogenesis-associated protein 5-like protein 1 OS=Homo sapiens GN=SPATA5L1 PE=1 SV=2	2	0.285206	22.7819	WT_GBA - CT	0.00662145	0.0361824	FALSE	no hit	6.00263
TROVE2	P10155	60 kDa SS-A/Ro ribonucleoprotein OS=Homo sapiens GN=TROVE2 PE=1 SV=2	16	-0.194333	26.152	WT_GBA - CT	0.00665658	0.0363149	FALSE	no hit	7.52712
DGKE	I3L112|P52429	Diacylglycerol kinase (Fragment) OS=Homo sapiens GN=DGKE PE=1 SV=1|Diacylglycerol kinase epsilon OS=Homo sapiens GN=DGKE PE=1 SV=1	4	-0.219923	23.2438	WT_GBA - CT	0.00665881	0.0363149	FALSE	no hit	6.12912
DMXL2	H0YLM8|Q8TDJ6-3	DmX-like protein 2 (Fragment) OS=Homo sapiens GN=DMXL2 PE=1 SV=1|Isoform 3 of DmX-like protein 2 OS=Homo sapiens GN=DMXL2	2	-0.180884	21.6098	WT_GBA - CT	0.0066716	0.0363149	FALSE	no hit	6.27118
NFIB	A0A0A0MRX8|O00712|O00712-4|O00712-5|Q5VW26|Q5VW27|Q5VW30	Nuclear factor 1 OS=Homo sapiens GN=NFIB PE=1 SV=1|Nuclear factor 1 B-type OS=Homo sapiens GN=NFIB PE=1 SV=2|Isoform 4 of Nuclear factor 1 B-type OS=Homo sapiens GN=NFIB|Isoform 5 of Nuclear factor 1 B-type OS=Homo sapiens GN=NFIB|Nuclear factor 1 OS=Homo sapiens GN=NFIB PE=1 SV=1|Nuclear factor 1 OS=Homo sapiens GN=NFIB PE=1 SV=1|Nuclear factor 1 OS=Homo sapiens GN=NFIB PE=1 SV=1	2	-0.373492	22.8123	WT_GBA - CT	0.00667809	0.0363149	FALSE	no hit	6.41786
BPNT1	O95861	3'(2'),5'-bisphosphate nucleotidase 1 OS=Homo sapiens GN=BPNT1 PE=1 SV=1	13	-0.18423	25.626	WT_GBA - CT	0.00667814	0.0363149	FALSE	no hit	7.45332
CRYZ	Q08257	Quinone oxidoreductase OS=Homo sapiens GN=CRYZ PE=1 SV=1	12	-0.232	25.3966	WT_GBA - CT	0.00668118	0.0363149	FALSE	no hit	7.34848
NUSAP1	Q9BXS6	Nucleolar and spindle-associated protein 1 OS=Homo sapiens GN=NUSAP1 PE=1 SV=1	9	-0.216574	25.0471	WT_GBA - CT	0.00669953	0.0363824	FALSE	no hit	7.02732
PHKG2	J3KNN3|P15735|P15735-2	Phosphorylase b kinase gamma catalytic chain, liver/testis isoform OS=Homo sapiens GN=PHKG2 PE=1 SV=1|Phosphorylase b kinase gamma catalytic chain, liver/testis isoform OS=Homo sapiens GN=PHKG2 PE=1 SV=1|Isoform 2 of Phosphorylase b kinase gamma catalytic chain, liver/testis isoform OS=Homo sapiens GN=PHKG2	7	0.232484	23.6779	WT_GBA - CT	0.00671214	0.0364187	FALSE	no hit	6.70227
NAGLU	P54802	Alpha-N-acetylglucosaminidase OS=Homo sapiens GN=NAGLU PE=1 SV=2	2	-0.386211	21.4322	WT_GBA - CT	0.00672566	0.0364599	FALSE	no hit	5.93765
PEO1	Q96RR1	Twinkle protein, mitochondrial OS=Homo sapiens GN=PEO1 PE=1 SV=1	4	0.190933	22.9925	WT_GBA - CT	0.00677088	0.0366726	FALSE	no hit	6.11165
ISCA2	Q86U28	Iron-sulfur cluster assembly 2 homolog, mitochondrial OS=Homo sapiens GN=ISCA2 PE=1 SV=2	5	0.194056	23.4213	WT_GBA - CT	0.00679036	0.0367457	FALSE	no hit	6.50197
KCTD1	Q719H9	BTB/POZ domain-containing protein KCTD1 OS=Homo sapiens GN=KCTD1 PE=1 SV=1	2	0.446012	22.8458	WT_GBA - CT	0.00681636	0.036854	FALSE	no hit	6.10234
APAF1	C9JLV4|O14727|O14727-4|O14727-5	Apoptotic protease-activating factor 1 OS=Homo sapiens GN=APAF1 PE=1 SV=1|Apoptotic protease-activating factor 1 OS=Homo sapiens GN=APAF1 PE=1 SV=2|Isoform 4 of Apoptotic protease-activating factor 1 OS=Homo sapiens GN=APAF1|Isoform 5 of Apoptotic protease-activating factor 1 OS=Homo sapiens GN=APAF1	6	-0.256915	23.7236	WT_GBA - CT	0.00684491	0.0369758	FALSE	no hit	6.57364
GPD2	P43304	Glycerol-3-phosphate dehydrogenase, mitochondrial OS=Homo sapiens GN=GPD2 PE=1 SV=3	21	-0.171376	26.3322	WT_GBA - CT	0.00685949	0.0370219	FALSE	no hit	7.2658
IRF2BP1	Q8IU81	Interferon regulatory factor 2-binding protein 1 OS=Homo sapiens GN=IRF2BP1 PE=1 SV=1	17	-0.179183	25.9471	WT_GBA - CT	0.00686739	0.037032	FALSE	no hit	7.24341
HMGCL	P35914	Hydroxymethylglutaryl-CoA lyase, mitochondrial OS=Homo sapiens GN=HMGCL PE=1 SV=2	4	-0.170759	24.1111	WT_GBA - CT	0.00688282	0.0370683	FALSE	no hit	6.90263
CORO1C	Q9ULV4|Q9ULV4-2|Q9ULV4-3	Coronin-1C OS=Homo sapiens GN=CORO1C PE=1 SV=1|Isoform 2 of Coronin-1C OS=Homo sapiens GN=CORO1C|Isoform 3 of Coronin-1C OS=Homo sapiens GN=CORO1C	20	-0.22169	27.0102	WT_GBA - CT	0.00688754	0.0370683	FALSE	no hit	7.78213
ARMCX2	Q7L311	Armadillo repeat-containing X-linked protein 2 OS=Homo sapiens GN=ARMCX2 PE=2 SV=1	3	0.258303	23.2512	WT_GBA - CT	0.00689705	0.0370683	FALSE	no hit	6.31628
ST13	P50502	Hsc70-interacting protein OS=Homo sapiens GN=ST13 PE=1 SV=2	16	0.322273	27.7346	WT_GBA - CT	0.00689826	0.0370683	FALSE	no hit	8.1417
DBNL	Q9UJU6|Q9UJU6-2	Drebrin-like protein OS=Homo sapiens GN=DBNL PE=1 SV=1|Isoform 2 of Drebrin-like protein OS=Homo sapiens GN=DBNL	19	-0.200064	26.826	WT_GBA - CT	0.00690506	0.0370725	FALSE	no hit	7.6532
PKP4	A0A0D9SF60|Q99569|Q99569-2	Plakophilin-4 OS=Homo sapiens GN=PKP4 PE=1 SV=1|Plakophilin-4 OS=Homo sapiens GN=PKP4 PE=1 SV=2|Isoform 2 of Plakophilin-4 OS=Homo sapiens GN=PKP4	2	-0.264933	21.2847	WT_GBA - CT	0.00693071	0.0371776	FALSE	no hit	6.05336
UCK2	Q9BZX2	Uridine-cytidine kinase 2 OS=Homo sapiens GN=UCK2 PE=1 SV=1	9	0.18873	25.2588	WT_GBA - CT	0.00693705	0.0371792	FALSE	no hit	7.07151
ZNF503	Q96F45	Zinc finger protein 503 OS=Homo sapiens GN=ZNF503 PE=1 SV=1	4	0.280832	23.6695	WT_GBA - CT	0.00697046	0.0373257	FALSE	no hit	6.49419
EGLN1	Q9GZT9	Egl nine homolog 1 OS=Homo sapiens GN=EGLN1 PE=1 SV=1	14	0.179321	26.3187	WT_GBA - CT	0.00698752	0.0373655	FALSE	no hit	7.26213
ALG14	Q96F25	UDP-N-acetylglucosamine transferase subunit ALG14 homolog OS=Homo sapiens GN=ALG14 PE=1 SV=1	2	0.247447	21.9083	WT_GBA - CT	0.00699006	0.0373655	FALSE	no hit	5.9713
THYN1	Q9P016	Thymocyte nuclear protein 1 OS=Homo sapiens GN=THYN1 PE=1 SV=1	8	-0.187213	25.5909	WT_GBA - CT	0.0070016	0.0373946	FALSE	no hit	7.3584
CYP20A1	E9PHG5|Q6UW02	Cytochrome P450 20A1 OS=Homo sapiens GN=CYP20A1 PE=1 SV=1|Cytochrome P450 20A1 OS=Homo sapiens GN=CYP20A1 PE=1 SV=1	5	0.243955	24.1864	WT_GBA - CT	0.00702992	0.0375132	FALSE	no hit	6.50751
SOCS6	O14544	Suppressor of cytokine signaling 6 OS=Homo sapiens GN=SOCS6 PE=1 SV=2	3	0.192998	23.9187	WT_GBA - CT	0.00704404	0.0375453	FALSE	no hit	6.19734
C19ORF43	Q9BQ61	Uncharacterized protein C19orf43 OS=Homo sapiens GN=C19orf43 PE=1 SV=1	10	-0.175424	26.3227	WT_GBA - CT	0.00704814	0.0375453	FALSE	no hit	7.59708
ARMC9	A0A087X1I8|Q7Z3E5|Q7Z3E5-2	LisH domain-containing protein ARMC9 OS=Homo sapiens GN=ARMC9 PE=1 SV=1|LisH domain-containing protein ARMC9 OS=Homo sapiens GN=ARMC9 PE=1 SV=2|Isoform 2 of LisH domain-containing protein ARMC9 OS=Homo sapiens GN=ARMC9	4	0.184007	22.8177	WT_GBA - CT	0.00708663	0.0377176	FALSE	no hit	6.11054
NR2F1	P10589	COUP transcription factor 1 OS=Homo sapiens GN=NR2F1 PE=1 SV=1	2	0.225005	22.7009	WT_GBA - CT	0.00710017	0.0377547	FALSE	no hit	6.39079
HMGN5	P82970|Q5JSK9	High mobility group nucleosome-binding domain-containing protein 5 OS=Homo sapiens GN=HMGN5 PE=1 SV=1|High mobility group nucleosome-binding domain-containing protein 5 (Fragment) OS=Homo sapiens GN=HMGN5 PE=1 SV=1	7	-0.548078	25.2536	WT_GBA - CT	0.00710589	0.0377547	FALSE	no hit	7.10029
KXD1	M0QX74|M0QXP3|M0QY77|M0R0B4|M0R228|M0R2G3|Q9BQD3	KxDL motif-containing protein 1 (Fragment) OS=Homo sapiens GN=KXD1 PE=1 SV=1|KxDL motif-containing protein 1 (Fragment) OS=Homo sapiens GN=KXD1 PE=1 SV=1|KxDL motif-containing protein 1 OS=Homo sapiens GN=KXD1 PE=1 SV=1|KxDL motif-containing protein 1 (Fragment) OS=Homo sapiens GN=KXD1 PE=1 SV=1|KxDL motif-containing protein 1 (Fragment) OS=Homo sapiens GN=KXD1 PE=1 SV=7|KxDL motif-containing pro…	2	0.255553	21.9546	WT_GBA - CT	0.007134	0.0378712	FALSE	no hit	6.26741
ANXA3	P12429	Annexin A3 OS=Homo sapiens GN=ANXA3 PE=1 SV=3	10	-0.257793	24.8232	WT_GBA - CT	0.00716456	0.0380006	FALSE	no hit	6.99009
GAB1	Q13480-2	Isoform 2 of GRB2-associated-binding protein 1 OS=Homo sapiens GN=GAB1	5	-0.204117	24.0937	WT_GBA - CT	0.00717371	0.0380034	FALSE	no hit	6.39102
GALE	Q14376	UDP-glucose 4-epimerase OS=Homo sapiens GN=GALE PE=1 SV=2	5	-0.173713	24.0915	WT_GBA - CT	0.00717838	0.0380034	FALSE	no hit	6.94035
SYN2	A0A087WW96|A0A087X2E3	Synapsin-2 OS=Homo sapiens GN=SYN2 PE=1 SV=1|Synapsin-2 OS=Homo sapiens GN=SYN2 PE=1 SV=1	2	-0.315429	20.0578	WT_GBA - CT	0.00718625	0.0380034	FALSE	no hit	5.6576
IMPA1	P29218|P29218-3	Inositol monophosphatase 1 OS=Homo sapiens GN=IMPA1 PE=1 SV=1|Isoform 3 of Inositol monophosphatase 1 OS=Homo sapiens GN=IMPA1	11	-0.137244	25.8116	WT_GBA - CT	0.00718983	0.0380034	FALSE	no hit	7.3921
GPATCH8	Q9UKJ3	G patch domain-containing protein 8 OS=Homo sapiens GN=GPATCH8 PE=1 SV=2	19	-0.152594	26.0972	WT_GBA - CT	0.00720215	0.0380358	FALSE	no hit	6.92707
NDUFB10	O96000	NADH dehydrogenase [ubiquinone] 1 beta subcomplex subunit 10 OS=Homo sapiens GN=NDUFB10 PE=1 SV=3	6	-0.344282	24.0633	WT_GBA - CT	0.00721477	0.0380478	FALSE	no hit	7.22298
GGH	Q92820	Gamma-glutamyl hydrolase OS=Homo sapiens GN=GGH PE=1 SV=2	5	-0.32994	24.1236	WT_GBA - CT	0.00721682	0.0380478	FALSE	no hit	6.69442
THAP4	Q8WY91	THAP domain-containing protein 4 OS=Homo sapiens GN=THAP4 PE=1 SV=2	2	0.282733	22.2733	WT_GBA - CT	0.00722713	0.0380695	FALSE	no hit	6.20086
NDC80	O14777	Kinetochore protein NDC80 homolog OS=Homo sapiens GN=NDC80 PE=1 SV=1	26	-0.188761	27.0396	WT_GBA - CT	0.0072401	0.0381051	FALSE	no hit	7.10683
CEP131	Q9UPN4|Q9UPN4-2	Centrosomal protein of 131 kDa OS=Homo sapiens GN=CEP131 PE=1 SV=3|Isoform 2 of Centrosomal protein of 131 kDa OS=Homo sapiens GN=CEP131	25	-0.175816	26.2924	WT_GBA - CT	0.00724996	0.0381244	FALSE	no hit	6.95962
USP22	Q9UPT9|Q9UPT9-2	Ubiquitin carboxyl-terminal hydrolase 22 OS=Homo sapiens GN=USP22 PE=1 SV=2|Isoform 2 of Ubiquitin carboxyl-terminal hydrolase 22 OS=Homo sapiens GN=USP22	5	0.252979	25.5442	WT_GBA - CT	0.00726567	0.0381743	FALSE	no hit	6.87557
SRRM1	A9Z1X7|Q8IYB3|Q8IYB3-2	Serine/arginine repetitive matrix protein 1 OS=Homo sapiens GN=SRRM1 PE=1 SV=1|Serine/arginine repetitive matrix protein 1 OS=Homo sapiens GN=SRRM1 PE=1 SV=2|Isoform 2 of Serine/arginine repetitive matrix protein 1 OS=Homo sapiens GN=SRRM1	14	-0.204951	26.2317	WT_GBA - CT	0.00727458	0.0381884	FALSE	no hit	7.79794
CPNE3	O75131	Copine-3 OS=Homo sapiens GN=CPNE3 PE=1 SV=1	16	-0.150332	26.9296	WT_GBA - CT	0.0072819	0.0381942	FALSE	no hit	7.70781
TFDP1	F5H452|Q14186|Q5JSB5|Q5JSB6	Transcription factor Dp-1 OS=Homo sapiens GN=TFDP1 PE=1 SV=2|Transcription factor Dp-1 OS=Homo sapiens GN=TFDP1 PE=1 SV=1|Transcription factor Dp-1 (Fragment) OS=Homo sapiens GN=TFDP1 PE=1 SV=7|Transcription factor Dp-1 (Fragment) OS=Homo sapiens GN=TFDP1 PE=1 SV=7	2	-0.327372	22.7895	WT_GBA - CT	0.00729618	0.0382365	FALSE	no hit	6.50477
ESRRA	P11474	Steroid hormone receptor ERR1 OS=Homo sapiens GN=ESRRA PE=1 SV=3	2	0.722746	19.4203	WT_GBA - CT	0.00731595	0.0383074	FALSE	candidate	5.468
TUBGCP2	Q9BSJ2|Q9BSJ2-4	Gamma-tubulin complex component 2 OS=Homo sapiens GN=TUBGCP2 PE=1 SV=2|Isoform 3 of Gamma-tubulin complex component 2 OS=Homo sapiens GN=TUBGCP2	17	-0.15162	26.1281	WT_GBA - CT	0.00732991	0.0383478	FALSE	no hit	7.09115
TRAPPC6A	O75865-2	Isoform 2 of Trafficking protein particle complex subunit 6A OS=Homo sapiens GN=TRAPPC6A	2	0.27492	22.2098	WT_GBA - CT	0.0073463	0.0384008	FALSE	no hit	6.51924
KPNA1	P52294	Importin subunit alpha-5 OS=Homo sapiens GN=KPNA1 PE=1 SV=3	11	-0.160542	25.7081	WT_GBA - CT	0.00735931	0.038422	FALSE	no hit	7.17124
MRPL37	Q9BZE1	39S ribosomal protein L37, mitochondrial OS=Homo sapiens GN=MRPL37 PE=1 SV=2	14	0.168166	25.5998	WT_GBA - CT	0.00736285	0.038422	FALSE	no hit	7.25515
RBMX2	A0A087WUI1|Q9Y388	RNA-binding motif protein, X-linked 2 OS=Homo sapiens GN=RBMX2 PE=1 SV=1|RNA-binding motif protein, X-linked 2 OS=Homo sapiens GN=RBMX2 PE=1 SV=2	4	-0.172772	23.81	WT_GBA - CT	0.00738299	0.0384944	FALSE	no hit	6.82775
CARNMT1	Q5T8U9|Q8N4J0	Carnosine N-methyltransferase OS=Homo sapiens GN=CARNMT1 PE=1 SV=1|Carnosine N-methyltransferase OS=Homo sapiens GN=CARNMT1 PE=1 SV=1	2	0.206921	22.9667	WT_GBA - CT	0.00741419	0.038595	FALSE	no hit	6.72896
SET	Q01105|Q01105-2	Protein SET OS=Homo sapiens GN=SET PE=1 SV=3|Isoform 2 of Protein SET OS=Homo sapiens GN=SET	19	-0.384525	27.3639	WT_GBA - CT	0.00741486	0.038595	FALSE	no hit	8.46747
DSG2	Q14126	Desmoglein-2 OS=Homo sapiens GN=DSG2 PE=1 SV=2	13	-0.268816	25.3981	WT_GBA - CT	0.00743239	0.0386365	FALSE	no hit	7.08629
TXNDC11	Q6PKC3|Q6PKC3-2	Thioredoxin domain-containing protein 11 OS=Homo sapiens GN=TXNDC11 PE=1 SV=2|Isoform 2 of Thioredoxin domain-containing protein 11 OS=Homo sapiens GN=TXNDC11	2	0.268237	21.6468	WT_GBA - CT	0.00743542	0.0386365	FALSE	no hit	5.85663
IGF2R	P11717	Cation-independent mannose-6-phosphate receptor OS=Homo sapiens GN=IGF2R PE=1 SV=3	41	-0.163485	27.2518	WT_GBA - CT	0.00749577	0.0388953	FALSE	no hit	7.00126
C1ORF43	Q9BWL3|Q9BWL3-2|Q9BWL3-3|Q9BWL3-4|X6R6F3|X6R6S3	Uncharacterized protein C1orf43 OS=Homo sapiens GN=C1orf43 PE=2 SV=1|Isoform 2 of Uncharacterized protein C1orf43 OS=Homo sapiens GN=C1orf43|Isoform 3 of Uncharacterized protein C1orf43 OS=Homo sapiens GN=C1orf43|Isoform 4 of Uncharacterized protein C1orf43 OS=Homo sapiens GN=C1orf43|Uncharacterized protein C1orf43 OS=Homo sapiens GN=C1orf43 PE=1 SV=1|Uncharacterized protein C1orf43 OS=Homo sapie…	3	0.280082	21.678	WT_GBA - CT	0.0074979	0.0388953	FALSE	no hit	6.03146
CHMP1A	Q9HD42	Charged multivesicular body protein 1a OS=Homo sapiens GN=CHMP1A PE=1 SV=1	8	-0.164953	25.6334	WT_GBA - CT	0.00753268	0.0390428	FALSE	no hit	7.58445
WDSUB1	Q8N9V3	WD repeat, SAM and U-box domain-containing protein 1 OS=Homo sapiens GN=WDSUB1 PE=1 SV=3	3	0.24088	22.8406	WT_GBA - CT	0.00762747	0.0395008	FALSE	no hit	5.95371
UBR3	Q6ZT12|Q6ZT12-4	E3 ubiquitin-protein ligase UBR3 OS=Homo sapiens GN=UBR3 PE=2 SV=2|Isoform 4 of E3 ubiquitin-protein ligase UBR3 OS=Homo sapiens GN=UBR3	3	0.189069	22.8551	WT_GBA - CT	0.00763536	0.0395083	FALSE	no hit	5.95062
NELFE	A0A0A0MSN9|P18615	Negative elongation factor E (Fragment) OS=Homo sapiens GN=NELFE PE=1 SV=5|Negative elongation factor E OS=Homo sapiens GN=NELFE PE=1 SV=3	14	0.143652	25.8218	WT_GBA - CT	0.00764291	0.0395141	FALSE	no hit	7.06476
NUFIP1	Q9UHK0	Nuclear fragile X mental retardation-interacting protein 1 OS=Homo sapiens GN=NUFIP1 PE=1 SV=2	6	0.180008	23.9132	WT_GBA - CT	0.00767231	0.0396327	FALSE	no hit	6.70489
PNISR	Q8TF01	Arginine/serine-rich protein PNISR OS=Homo sapiens GN=PNISR PE=1 SV=2	5	-0.182343	24.7891	WT_GBA - CT	0.00770218	0.0397536	FALSE	no hit	6.93774
HSPA1B|HSPA1A	A0A0G2JIW1|P0DMV8|P0DMV9	Heat shock 70 kDa protein 1B OS=Homo sapiens GN=HSPA1B PE=1 SV=1|Heat shock 70 kDa protein 1A OS=Homo sapiens GN=HSPA1A PE=1 SV=1|Heat shock 70 kDa protein 1B OS=Homo sapiens GN=HSPA1B PE=1 SV=1	23	0.337547	27.9115	WT_GBA - CT	0.00774545	0.0399434	FALSE	no hit	8.54144
VCL	P18206|P18206-2	Vinculin OS=Homo sapiens GN=VCL PE=1 SV=4|Isoform 1 of Vinculin OS=Homo sapiens GN=VCL	74	-0.140319	28.9975	WT_GBA - CT	0.00775878	0.0399648	FALSE	no hit	8.04585
DCPS	Q96C86	m7GpppX diphosphatase OS=Homo sapiens GN=DCPS PE=1 SV=2	8	-0.192697	24.7062	WT_GBA - CT	0.00776263	0.0399648	FALSE	no hit	7.16899
CEP78	A8MST6|Q5JTW2|Q5JTW2-5	Centrosomal protein of 78 kDa OS=Homo sapiens GN=CEP78 PE=1 SV=2|Centrosomal protein of 78 kDa OS=Homo sapiens GN=CEP78 PE=1 SV=1|Isoform 4 of Centrosomal protein of 78 kDa OS=Homo sapiens GN=CEP78	4	-0.201663	23.1418	WT_GBA - CT	0.00778841	0.0400397	FALSE	no hit	6.33557
LRCH2	Q5VUJ6|Q5VUJ6-2	Leucine-rich repeat and calponin homology domain-containing protein 2 OS=Homo sapiens GN=LRCH2 PE=2 SV=2|Isoform 2 of Leucine-rich repeat and calponin homology domain-containing protein 2 OS=Homo sapiens GN=LRCH2	6	-0.170059	23.9994	WT_GBA - CT	0.0077902	0.0400397	FALSE	no hit	6.25962
PSME4	Q14997	Proteasome activator complex subunit 4 OS=Homo sapiens GN=PSME4 PE=1 SV=2	12	0.193443	25.0645	WT_GBA - CT	0.00779825	0.0400475	FALSE	no hit	6.95297
TAPT1	Q6NXT6|Q6NXT6-2	Transmembrane anterior posterior transformation protein 1 homolog OS=Homo sapiens GN=TAPT1 PE=1 SV=1|Isoform 2 of Transmembrane anterior posterior transformation protein 1 homolog OS=Homo sapiens GN=TAPT1	2	0.20046	22.3365	WT_GBA - CT	0.00787866	0.040365	FALSE	no hit	6.42394
GOLGA2	A0A0C4DGS5|Q08379	Golgi autoantigen, golgin subfamily a, 2, isoform CRA_a OS=Homo sapiens GN=GOLGA2 PE=1 SV=1|Golgin subfamily A member 2 OS=Homo sapiens GN=GOLGA2 PE=1 SV=3	22	0.185302	26.5474	WT_GBA - CT	0.0078823	0.040365	FALSE	no hit	7.14888
ME2	P23368	NAD-dependent malic enzyme, mitochondrial OS=Homo sapiens GN=ME2 PE=1 SV=1	14	-0.145294	26.3438	WT_GBA - CT	0.00788256	0.040365	FALSE	no hit	7.43681
REL	Q04864|Q04864-2	Proto-oncogene c-Rel OS=Homo sapiens GN=REL PE=1 SV=1|Isoform 2 of Proto-oncogene c-Rel OS=Homo sapiens GN=REL	4	0.181929	23.6101	WT_GBA - CT	0.00788635	0.040365	FALSE	no hit	6.45337
FBXO11	Q86XK2|Q86XK2-5|Q86XK2-6	F-box only protein 11 OS=Homo sapiens GN=FBXO11 PE=1 SV=3|Isoform 5 of F-box only protein 11 OS=Homo sapiens GN=FBXO11|Isoform 6 of F-box only protein 11 OS=Homo sapiens GN=FBXO11	2	0.297137	21.3725	WT_GBA - CT	0.00792148	0.040511	FALSE	no hit	5.72449
CKS2	P33552	Cyclin-dependent kinases regulatory subunit 2 OS=Homo sapiens GN=CKS2 PE=1 SV=1	3	-0.285237	23.0855	WT_GBA - CT	0.00792928	0.0405172	FALSE	no hit	7.30846
PODXL	O00592|O00592-2	Podocalyxin OS=Homo sapiens GN=PODXL PE=1 SV=2|Isoform 2 of Podocalyxin OS=Homo sapiens GN=PODXL	4	0.272717	25.0037	WT_GBA - CT	0.00797229	0.0406736	FALSE	no hit	7.14855
CIZ1	F5H2X7|H0Y5D5|Q9ULV3|Q9ULV3-2|Q9ULV3-5	Cip1-interacting zinc finger protein OS=Homo sapiens GN=CIZ1 PE=1 SV=2|Cip1-interacting zinc finger protein (Fragment) OS=Homo sapiens GN=CIZ1 PE=1 SV=1|Cip1-interacting zinc finger protein OS=Homo sapiens GN=CIZ1 PE=1 SV=2|Isoform 2 of Cip1-interacting zinc finger protein OS=Homo sapiens GN=CIZ1|Isoform 5 of Cip1-interacting zinc finger protein OS=Homo sapiens GN=CIZ1	7	0.20972	23.8079	WT_GBA - CT	0.0079796	0.0406736	FALSE	no hit	6.47104
CIT	O14578-4	Isoform 4 of Citron Rho-interacting kinase OS=Homo sapiens GN=CIT	26	-0.145798	26.3063	WT_GBA - CT	0.00797976	0.0406736	FALSE	no hit	6.65041
RAB39A	Q14964	Ras-related protein Rab-39A OS=Homo sapiens GN=RAB39A PE=1 SV=2	3	0.294693	22.6796	WT_GBA - CT	0.00798891	0.0406865	FALSE	no hit	6.05443
CBX8	Q9HC52	Chromobox protein homolog 8 OS=Homo sapiens GN=CBX8 PE=1 SV=3	6	0.236762	23.9946	WT_GBA - CT	0.00803072	0.0408655	FALSE	no hit	6.33555
RICTOR	Q6R327|Q6R327-3	Rapamycin-insensitive companion of mTOR OS=Homo sapiens GN=RICTOR PE=1 SV=1|Isoform 3 of Rapamycin-insensitive companion of mTOR OS=Homo sapiens GN=RICTOR	3	-0.228134	22.3301	WT_GBA - CT	0.00809588	0.041163	FALSE	no hit	5.87164
MORC3	Q14149	MORC family CW-type zinc finger protein 3 OS=Homo sapiens GN=MORC3 PE=1 SV=3	11	-0.17513	25.0535	WT_GBA - CT	0.00812726	0.0412883	FALSE	no hit	6.51128
BRSK2	Q8IWQ3|Q8IWQ3-2|Q8IWQ3-3|Q8IWQ3-4	Serine/threonine-protein kinase BRSK2 OS=Homo sapiens GN=BRSK2 PE=1 SV=3|Isoform 2 of Serine/threonine-protein kinase BRSK2 OS=Homo sapiens GN=BRSK2|Isoform 3 of Serine/threonine-protein kinase BRSK2 OS=Homo sapiens GN=BRSK2|Isoform 4 of Serine/threonine-protein kinase BRSK2 OS=Homo sapiens GN=BRSK2	8	-0.160465	24.2631	WT_GBA - CT	0.00814018	0.0413198	FALSE	no hit	6.60201
PPIP5K2	A0A087WZV0|O43314|O43314-2	Inositol hexakisphosphate and diphosphoinositol-pentakisphosphate kinase 2 OS=Homo sapiens GN=PPIP5K2 PE=1 SV=1|Inositol hexakisphosphate and diphosphoinositol-pentakisphosphate kinase 2 OS=Homo sapiens GN=PPIP5K2 PE=1 SV=3|Isoform 2 of Inositol hexakisphosphate and diphosphoinositol-pentakisphosphate kinase 2 OS=Homo sapiens GN=PPIP5K2	4	-0.221571	23.0919	WT_GBA - CT	0.00815364	0.0413539	FALSE	no hit	6.29696
PRR14L	Q5THK1	Protein PRR14L OS=Homo sapiens GN=PRR14L PE=1 SV=1	14	-0.149799	25.072	WT_GBA - CT	0.00816683	0.0413838	FALSE	no hit	6.70445
FHL1	Q13642|Q13642-1|Q13642-4|Q13642-5	Four and a half LIM domains protein 1 OS=Homo sapiens GN=FHL1 PE=1 SV=4|Isoform 1 of Four and a half LIM domains protein 1 OS=Homo sapiens GN=FHL1|Isoform 4 of Four and a half LIM domains protein 1 OS=Homo sapiens GN=FHL1|Isoform 5 of Four and a half LIM domains protein 1 OS=Homo sapiens GN=FHL1	15	-0.210673	26.764	WT_GBA - CT	0.00817301	0.0413838	FALSE	no hit	8.16337
MAN2B1	O00754|O00754-2	Lysosomal alpha-mannosidase OS=Homo sapiens GN=MAN2B1 PE=1 SV=3|Isoform 2 of Lysosomal alpha-mannosidase OS=Homo sapiens GN=MAN2B1	11	0.23743	24.8113	WT_GBA - CT	0.00820907	0.0415322	FALSE	no hit	6.85224
OPTN	Q96CV9	Optineurin OS=Homo sapiens GN=OPTN PE=1 SV=2	8	-0.36889	24.4121	WT_GBA - CT	0.00821823	0.0415444	FALSE	no hit	6.73052
ZNF507	B9EGE7|Q8TCN5	ZNF507 protein OS=Homo sapiens GN=ZNF507 PE=1 SV=1|Zinc finger protein 507 OS=Homo sapiens GN=ZNF507 PE=1 SV=2	2	0.254361	22.7023	WT_GBA - CT	0.00824584	0.0416166	FALSE	no hit	5.94483
SLC1A3	A0A087WT87|A0A087X0U3|P43003|P43003-2	Excitatory amino acid transporter 1 OS=Homo sapiens GN=SLC1A3 PE=1 SV=1|Excitatory amino acid transporter 1 OS=Homo sapiens GN=SLC1A3 PE=1 SV=1|Excitatory amino acid transporter 1 OS=Homo sapiens GN=SLC1A3 PE=1 SV=1|Isoform 2 of Excitatory amino acid transporter 1 OS=Homo sapiens GN=SLC1A3	7	0.275868	24.8952	WT_GBA - CT	0.00824607	0.0416166	FALSE	no hit	6.94076
CNNM3	Q8NE01	Metal transporter CNNM3 OS=Homo sapiens GN=CNNM3 PE=1 SV=1	6	0.164253	23.4864	WT_GBA - CT	0.00827794	0.0417332	FALSE	no hit	6.536
ATG9A	Q7Z3C6|Q7Z3C6-2	Autophagy-related protein 9A OS=Homo sapiens GN=ATG9A PE=1 SV=3|Isoform 2 of Autophagy-related protein 9A OS=Homo sapiens GN=ATG9A	11	-0.191985	24.437	WT_GBA - CT	0.00828277	0.0417332	FALSE	no hit	6.86741
ING4	Q9UNL4|Q9UNL4-2|Q9UNL4-3|Q9UNL4-4|Q9UNL4-5|Q9UNL4-6|Q9UNL4-7|Q9UNL4-8	Inhibitor of growth protein 4 OS=Homo sapiens GN=ING4 PE=1 SV=1|Isoform 2 of Inhibitor of growth protein 4 OS=Homo sapiens GN=ING4|Isoform 3 of Inhibitor of growth protein 4 OS=Homo sapiens GN=ING4|Isoform 4 of Inhibitor of growth protein 4 OS=Homo sapiens GN=ING4|Isoform 5 of Inhibitor of growth protein 4 OS=Homo sapiens GN=ING4|Isoform 6 of Inhibitor of growth protein 4 OS=Homo sapiens GN=ING4|…	2	-0.231963	23.376	WT_GBA - CT	0.00830825	0.0418273	FALSE	no hit	6.4132
UNG	P13051	Uracil-DNA glycosylase OS=Homo sapiens GN=UNG PE=1 SV=2	5	-0.20779	23.6448	WT_GBA - CT	0.00832401	0.0418723	FALSE	no hit	6.78467
RAB11FIP5	Q9BXF6	Rab11 family-interacting protein 5 OS=Homo sapiens GN=RAB11FIP5 PE=1 SV=1	7	-0.182291	24.0693	WT_GBA - CT	0.00834677	0.0419228	FALSE	no hit	7.11573
CUL1	Q13616	Cullin-1 OS=Homo sapiens GN=CUL1 PE=1 SV=2	27	0.181534	27.0519	WT_GBA - CT	0.0083477	0.0419228	FALSE	no hit	7.61441
PAN2	Q504Q3|Q504Q3-2|Q504Q3-3	PAB-dependent poly(A)-specific ribonuclease subunit PAN2 OS=Homo sapiens GN=PAN2 PE=1 SV=3|Isoform 2 of PAB-dependent poly(A)-specific ribonuclease subunit PAN2 OS=Homo sapiens GN=PAN2|Isoform 3 of PAB-dependent poly(A)-specific ribonuclease subunit PAN2 OS=Homo sapiens GN=PAN2	9	0.242152	24.6191	WT_GBA - CT	0.00839622	0.0420691	FALSE	no hit	6.4951
PTGES3	Q15185|Q15185-4	Prostaglandin E synthase 3 OS=Homo sapiens GN=PTGES3 PE=1 SV=1|Isoform 4 of Prostaglandin E synthase 3 OS=Homo sapiens GN=PTGES3	8	-0.249872	26.996	WT_GBA - CT	0.00840205	0.0420691	FALSE	no hit	8.3629
DNAJC13	O75165	DnaJ homolog subfamily C member 13 OS=Homo sapiens GN=DNAJC13 PE=1 SV=5	9	-0.235938	23.477	WT_GBA - CT	0.00840919	0.0420691	FALSE	no hit	6.03871
SMYD5	Q6GMV2	SET and MYND domain-containing protein 5 OS=Homo sapiens GN=SMYD5 PE=1 SV=2	4	0.168677	23.7913	WT_GBA - CT	0.00841016	0.0420691	FALSE	no hit	6.52635
CTSC	P53634	Dipeptidyl peptidase 1 OS=Homo sapiens GN=CTSC PE=1 SV=2	3	-0.194163	22.1106	WT_GBA - CT	0.00841107	0.0420691	FALSE	no hit	6.77613
MPZL1	O95297|O95297-2	Myelin protein zero-like protein 1 OS=Homo sapiens GN=MPZL1 PE=1 SV=1|Isoform 2 of Myelin protein zero-like protein 1 OS=Homo sapiens GN=MPZL1	6	0.154691	25.128	WT_GBA - CT	0.00843131	0.042136	FALSE	no hit	6.97117
CEP112	F5GYE8|Q8N8E3	Centrosomal protein of 112 kDa OS=Homo sapiens GN=CEP112 PE=1 SV=1|Centrosomal protein of 112 kDa OS=Homo sapiens GN=CEP112 PE=1 SV=2	5	-0.210506	24.1374	WT_GBA - CT	0.00844291	0.0421596	FALSE	no hit	6.322
ZAK	Q9NYL2|Q9NYL2-2	Mitogen-activated protein kinase kinase kinase MLT OS=Homo sapiens GN=ZAK PE=1 SV=3|Isoform 2 of Mitogen-activated protein kinase kinase kinase MLT OS=Homo sapiens GN=ZAK	7	-0.1781	23.594	WT_GBA - CT	0.00848103	0.0422989	FALSE	no hit	6.46043
NXN	Q6DKJ4	Nucleoredoxin OS=Homo sapiens GN=NXN PE=1 SV=2	9	-0.165056	24.7011	WT_GBA - CT	0.00848458	0.0422989	FALSE	no hit	7.00195
IQGAP1	P46940	Ras GTPase-activating-like protein IQGAP1 OS=Homo sapiens GN=IQGAP1 PE=1 SV=1	58	-0.159487	28.0979	WT_GBA - CT	0.00850031	0.042343	FALSE	no hit	7.64345
UQCRQ	O14949	Cytochrome b-c1 complex subunit 8 OS=Homo sapiens GN=UQCRQ PE=1 SV=4	5	-0.227267	24.541	WT_GBA - CT	0.00853582	0.0424854	FALSE	no hit	7.373
HELZ	J3QS41|P42694	Probable helicase with zinc finger domain OS=Homo sapiens GN=HELZ PE=1 SV=1|Probable helicase with zinc finger domain OS=Homo sapiens GN=HELZ PE=1 SV=2	16	-0.14926	25.1358	WT_GBA - CT	0.00855285	0.0425357	FALSE	no hit	6.63902
TRMT2A	F2Z2W7|Q8IZ69|Q8IZ69-2	tRNA (uracil-5-)-methyltransferase homolog A OS=Homo sapiens GN=TRMT2A PE=1 SV=1|tRNA (uracil-5-)-methyltransferase homolog A OS=Homo sapiens GN=TRMT2A PE=1 SV=2|Isoform 2 of tRNA (uracil-5-)-methyltransferase homolog A OS=Homo sapiens GN=TRMT2A	15	-0.143123	25.3446	WT_GBA - CT	0.00858432	0.0426577	FALSE	no hit	7.04009
ZBTB40	F8WAI8|Q9NUA8	Zinc finger and BTB domain-containing protein 40 OS=Homo sapiens GN=ZBTB40 PE=1 SV=1|Zinc finger and BTB domain-containing protein 40 OS=Homo sapiens GN=ZBTB40 PE=1 SV=4	3	0.282347	22.1443	WT_GBA - CT	0.0086106	0.0427537	FALSE	no hit	5.74772
BRK1	Q8WUW1|Q8WUW1-2	Protein BRICK1 OS=Homo sapiens GN=BRK1 PE=1 SV=1|Isoform 2 of Protein BRICK1 OS=Homo sapiens GN=BRK1	4	-0.375652	24.1778	WT_GBA - CT	0.00870163	0.0431396	FALSE	no hit	7.59343
KIAA1109	Q2LD37-6	Isoform 6 of Uncharacterized protein KIAA1109 OS=Homo sapiens GN=KIAA1109	2	0.296916	22.5705	WT_GBA - CT	0.00870701	0.0431396	FALSE	no hit	6.65714
CTTN	Q14247	Src substrate cortactin OS=Homo sapiens GN=CTTN PE=1 SV=2	30	-0.283764	27.6593	WT_GBA - CT	0.00871585	0.0431396	FALSE	no hit	7.99197
TOM1L1	I3L4I4|I3NI44|J3KQU4|O75674|O75674-2|O75674-3	TOM1-like protein 1 OS=Homo sapiens GN=TOM1L1 PE=1 SV=1|TOM1-like protein 1 OS=Homo sapiens GN=TOM1L1 PE=1 SV=1|TOM1-like protein 1 OS=Homo sapiens GN=TOM1L1 PE=1 SV=1|TOM1-like protein 1 OS=Homo sapiens GN=TOM1L1 PE=1 SV=2|Isoform 2 of TOM1-like protein 1 OS=Homo sapiens GN=TOM1L1|Isoform 3 of TOM1-like protein 1 OS=Homo sapiens GN=TOM1L1	4	-0.210585	22.8642	WT_GBA - CT	0.00871642	0.0431396	FALSE	no hit	6.47615
THADA	Q6YHU6|Q6YHU6-3	Thyroid adenoma-associated protein OS=Homo sapiens GN=THADA PE=1 SV=1|Isoform 3 of Thyroid adenoma-associated protein OS=Homo sapiens GN=THADA	9	0.184511	24.483	WT_GBA - CT	0.00881343	0.0435704	FALSE	no hit	6.2516
CAPZA2	P47755	F-actin-capping protein subunit alpha-2 OS=Homo sapiens GN=CAPZA2 PE=1 SV=3	10	0.174887	24.9636	WT_GBA - CT	0.00881766	0.0435704	FALSE	no hit	7.06213
GRPEL2	Q8TAA5	GrpE protein homolog 2, mitochondrial OS=Homo sapiens GN=GRPEL2 PE=1 SV=1	3	-0.269422	22.4994	WT_GBA - CT	0.00885494	0.0437195	FALSE	no hit	6.25203
ASS1	P00966	Argininosuccinate synthase OS=Homo sapiens GN=ASS1 PE=1 SV=2	14	-0.490793	26.1777	WT_GBA - CT	0.00887155	0.0437316	FALSE	no hit	7.52744
ASB6	Q9NWX5	Ankyrin repeat and SOCS box protein 6 OS=Homo sapiens GN=ASB6 PE=1 SV=1	10	0.175046	24.7214	WT_GBA - CT	0.00887162	0.0437316	FALSE	no hit	6.76107
FOXC1	Q12948	Forkhead box protein C1 OS=Homo sapiens GN=FOXC1 PE=1 SV=3	3	0.377642	22.4034	WT_GBA - CT	0.00891625	0.0438768	FALSE	no hit	6.34745
HIC2	Q96JB3|Q96JB3-2	Hypermethylated in cancer 2 protein OS=Homo sapiens GN=HIC2 PE=1 SV=2|Isoform 2 of Hypermethylated in cancer 2 protein OS=Homo sapiens GN=HIC2	4	0.180618	23.1942	WT_GBA - CT	0.00892249	0.0438768	FALSE	no hit	6.61382
MRPS12	O15235	28S ribosomal protein S12, mitochondrial OS=Homo sapiens GN=MRPS12 PE=1 SV=1	5	0.165246	24.5607	WT_GBA - CT	0.00892252	0.0438768	FALSE	no hit	6.99088
CNOT4	O95628-10|O95628-4|O95628-8|O95628-9	Isoform 10 of CCR4-NOT transcription complex subunit 4 OS=Homo sapiens GN=CNOT4|Isoform 4 of CCR4-NOT transcription complex subunit 4 OS=Homo sapiens GN=CNOT4|Isoform 8 of CCR4-NOT transcription complex subunit 4 OS=Homo sapiens GN=CNOT4|Isoform 9 of CCR4-NOT transcription complex subunit 4 OS=Homo sapiens GN=CNOT4	5	0.185575	23.8248	WT_GBA - CT	0.00895286	0.043984	FALSE	no hit	6.5657
CASK	O14936|O14936-3	Peripheral plasma membrane protein CASK OS=Homo sapiens GN=CASK PE=1 SV=3|Isoform 3 of Peripheral plasma membrane protein CASK OS=Homo sapiens GN=CASK	17	-0.149974	25.5195	WT_GBA - CT	0.00895865	0.043984	FALSE	no hit	7.29952
WARS2	Q9UGM6	Tryptophan--tRNA ligase, mitochondrial OS=Homo sapiens GN=WARS2 PE=1 SV=1	3	0.212624	23.7708	WT_GBA - CT	0.00896932	0.0439899	FALSE	no hit	6.76015
PXDN	Q92626	Peroxidasin homolog OS=Homo sapiens GN=PXDN PE=1 SV=2	2	-0.4595	21.2795	WT_GBA - CT	0.00897417	0.0439899	FALSE	no hit	5.80894
USP11	G5E9A6	Ubiquitin carboxyl-terminal hydrolase 11 OS=Homo sapiens GN=USP11 PE=1 SV=1	21	-0.22693	25.7846	WT_GBA - CT	0.00900773	0.0441192	FALSE	no hit	7.17602
MRGBP	Q9NV56	MRG/MORF4L-binding protein OS=Homo sapiens GN=MRGBP PE=1 SV=1	2	-0.261925	22.9463	WT_GBA - CT	0.00903602	0.0442225	FALSE	no hit	6.84022
TOMM40	O96008|O96008-2	Mitochondrial import receptor subunit TOM40 homolog OS=Homo sapiens GN=TOMM40 PE=1 SV=1|Isoform 2 of Mitochondrial import receptor subunit TOM40 homolog OS=Homo sapiens GN=TOMM40	6	-0.631577	24.5875	WT_GBA - CT	0.00907074	0.0443571	FALSE	candidate	6.85166
RBMS1	E7ETU5|F6Y5H0|P29558|P29558-2	RNA-binding motif, single-stranded-interacting protein 1 OS=Homo sapiens GN=RBMS1 PE=1 SV=1|RNA-binding motif, single-stranded-interacting protein 1 OS=Homo sapiens GN=RBMS1 PE=1 SV=1|RNA-binding motif, single-stranded-interacting protein 1 OS=Homo sapiens GN=RBMS1 PE=1 SV=3|Isoform 2 of RNA-binding motif, single-stranded-interacting protein 1 OS=Homo sapiens GN=RBMS1	2	0.30096	23.2612	WT_GBA - CT	0.00912896	0.0445803	FALSE	no hit	6.2962
PRKCH	P24723	Protein kinase C eta type OS=Homo sapiens GN=PRKCH PE=1 SV=4	3	0.197133	23.0034	WT_GBA - CT	0.00913091	0.0445803	FALSE	no hit	6.16263
GFER	H3BRD2|P55789	Sulfhydryl oxidase (Fragment) OS=Homo sapiens GN=GFER PE=1 SV=1|FAD-linked sulfhydryl oxidase ALR OS=Homo sapiens GN=GFER PE=1 SV=2	3	-0.214699	22.1929	WT_GBA - CT	0.0091641	0.044706	FALSE	no hit	6.2627
ESPL1	Q14674	Separin OS=Homo sapiens GN=ESPL1 PE=1 SV=3	12	-0.176263	24.6614	WT_GBA - CT	0.00917121	0.044706	FALSE	no hit	6.4065
E2F3	O00716	Transcription factor E2F3 OS=Homo sapiens GN=E2F3 PE=1 SV=1	3	0.240841	23.076	WT_GBA - CT	0.00922045	0.0448727	FALSE	no hit	6.08799
GNG5	P63218	Guanine nucleotide-binding protein G(I)/G(S)/G(O) subunit gamma-5 OS=Homo sapiens GN=GNG5 PE=1 SV=3	3	-0.358355	23.5053	WT_GBA - CT	0.00922254	0.0448727	FALSE	no hit	7.22571
TLK2	Q86UE8|Q86UE8-2	Serine/threonine-protein kinase tousled-like 2 OS=Homo sapiens GN=TLK2 PE=1 SV=2|Isoform 2 of Serine/threonine-protein kinase tousled-like 2 OS=Homo sapiens GN=TLK2	9	-0.162418	25.4425	WT_GBA - CT	0.00923277	0.0448727	FALSE	no hit	6.9172
EVI5L	Q96CN4|Q96CN4-2	EVI5-like protein OS=Homo sapiens GN=EVI5L PE=1 SV=1|Isoform 2 of EVI5-like protein OS=Homo sapiens GN=EVI5L	2	-0.313814	20.8667	WT_GBA - CT	0.00923463	0.0448727	FALSE	no hit	5.6543
VPS37B	Q9H9H4	Vacuolar protein sorting-associated protein 37B OS=Homo sapiens GN=VPS37B PE=1 SV=1	5	-0.161065	23.996	WT_GBA - CT	0.00924958	0.0449098	FALSE	no hit	6.87849
POP1	Q99575	Ribonucleases P/MRP protein subunit POP1 OS=Homo sapiens GN=POP1 PE=1 SV=2	21	-0.168615	26.1499	WT_GBA - CT	0.00935446	0.0453832	FALSE	no hit	7.09153
DLG3	Q92796-2|Q92796-3	Isoform 2 of Disks large homolog 3 OS=Homo sapiens GN=DLG3|Isoform 3 of Disks large homolog 3 OS=Homo sapiens GN=DLG3	4	-0.180857	22.8136	WT_GBA - CT	0.00944749	0.0457983	FALSE	no hit	6.50604
BCAM	A0A087WXM8|P50895	Basal cell adhesion molecule OS=Homo sapiens GN=BCAM PE=1 SV=1|Basal cell adhesion molecule OS=Homo sapiens GN=BCAM PE=1 SV=2	2	-0.38614	22.1556	WT_GBA - CT	0.00946429	0.04582	FALSE	no hit	6.08779
VDAC2	P45880	Voltage-dependent anion-selective channel protein 2 OS=Homo sapiens GN=VDAC2 PE=1 SV=2	11	-0.447775	25.7453	WT_GBA - CT	0.00946689	0.04582	FALSE	no hit	7.74603
PACSIN3	Q9UKS6	Protein kinase C and casein kinase substrate in neurons protein 3 OS=Homo sapiens GN=PACSIN3 PE=1 SV=2	11	-0.203978	24.6304	WT_GBA - CT	0.0094972	0.0459057	FALSE	no hit	7.00425
MRPL28	A2IDC6|Q13084	39S ribosomal protein L28, mitochondrial (Fragment) OS=Homo sapiens GN=MRPL28 PE=1 SV=1|39S ribosomal protein L28, mitochondrial OS=Homo sapiens GN=MRPL28 PE=1 SV=4	9	0.199241	25.549	WT_GBA - CT	0.00949955	0.0459057	FALSE	no hit	7.35245
METTL7A	F8VQX6|H0YI09|Q9H8H3	Methyltransferase-like protein 7A (Fragment) OS=Homo sapiens GN=METTL7A PE=1 SV=1|Methyltransferase-like protein 7A (Fragment) OS=Homo sapiens GN=METTL7A PE=1 SV=1|Methyltransferase-like protein 7A OS=Homo sapiens GN=METTL7A PE=1 SV=1	2	0.443206	21.5105	WT_GBA - CT	0.00952059	0.0459117	FALSE	no hit	6.1846
PLOD2	O00469-2	Isoform 2 of Procollagen-lysine,2-oxoglutarate 5-dioxygenase 2 OS=Homo sapiens GN=PLOD2	9	-0.189081	24.6567	WT_GBA - CT	0.00953102	0.0459117	FALSE	no hit	6.70744
ZC3H4	Q9UPT8	Zinc finger CCCH domain-containing protein 4 OS=Homo sapiens GN=ZC3H4 PE=1 SV=3	14	-0.153463	25.3566	WT_GBA - CT	0.00953168	0.0459117	FALSE	no hit	7.02781
ABCC4	O15439	Multidrug resistance-associated protein 4 OS=Homo sapiens GN=ABCC4 PE=1 SV=3	14	-0.204707	25.116	WT_GBA - CT	0.00953475	0.0459117	FALSE	no hit	6.73385
AKAP8	O43823	A-kinase anchor protein 8 OS=Homo sapiens GN=AKAP8 PE=1 SV=1	16	0.161142	26.1916	WT_GBA - CT	0.00953815	0.0459117	FALSE	no hit	7.06056
UBE2K	D6RDM7|P61086	Ubiquitin-conjugating enzyme E2 K (Fragment) OS=Homo sapiens GN=UBE2K PE=1 SV=1|Ubiquitin-conjugating enzyme E2 K OS=Homo sapiens GN=UBE2K PE=1 SV=3	6	-0.136693	25.7826	WT_GBA - CT	0.00956789	0.0460188	FALSE	no hit	7.80744
ATE1	B4E107|F5GXE4|O95260-2	Arginyl-tRNA--protein transferase 1 OS=Homo sapiens GN=ATE1 PE=1 SV=1|Arginyl-tRNA--protein transferase 1 OS=Homo sapiens GN=ATE1 PE=1 SV=1|Isoform ATE1-2 of Arginyl-tRNA--protein transferase 1 OS=Homo sapiens GN=ATE1	7	-0.16215	24.7101	WT_GBA - CT	0.00963176	0.046289	FALSE	no hit	6.50427
CIR1	Q86X95	Corepressor interacting with RBPJ 1 OS=Homo sapiens GN=CIR1 PE=1 SV=1	5	-0.144057	23.9145	WT_GBA - CT	0.00963914	0.046289	FALSE	no hit	6.32076
RPP25L	Q8N5L8	Ribonuclease P protein subunit p25-like protein OS=Homo sapiens GN=RPP25L PE=1 SV=1	4	0.434323	23.4478	WT_GBA - CT	0.0096742	0.0463639	FALSE	no hit	6.83909
POLA1	A6NMQ1|P09884	DNA polymerase OS=Homo sapiens GN=POLA1 PE=1 SV=1|DNA polymerase alpha catalytic subunit OS=Homo sapiens GN=POLA1 PE=1 SV=2	32	0.180892	27.1076	WT_GBA - CT	0.00967793	0.0463639	FALSE	no hit	7.28531
BOP1	Q14137	Ribosome biogenesis protein BOP1 OS=Homo sapiens GN=BOP1 PE=1 SV=2	11	0.173121	24.9978	WT_GBA - CT	0.00968184	0.0463639	FALSE	no hit	6.95718
SPIN1	Q9Y657	Spindlin-1 OS=Homo sapiens GN=SPIN1 PE=1 SV=3	5	0.181242	23.8915	WT_GBA - CT	0.00969213	0.0463639	FALSE	no hit	6.46796
SLC29A1	Q99808|Q99808-2	Equilibrative nucleoside transporter 1 OS=Homo sapiens GN=SLC29A1 PE=1 SV=3|Isoform 2 of Equilibrative nucleoside transporter 1 OS=Homo sapiens GN=SLC29A1	6	0.239814	25.3093	WT_GBA - CT	0.00969248	0.0463639	FALSE	no hit	6.87698
AKT1S1	Q96B36	Proline-rich AKT1 substrate 1 OS=Homo sapiens GN=AKT1S1 PE=1 SV=1	7	0.18643	24.8919	WT_GBA - CT	0.00979204	0.0467946	FALSE	no hit	7.06187
ZNF830	Q96NB3	Zinc finger protein 830 OS=Homo sapiens GN=ZNF830 PE=1 SV=2	10	-0.137319	24.8172	WT_GBA - CT	0.00979777	0.0467946	FALSE	no hit	6.84747
PPP2R2D	Q66LE6	Serine/threonine-protein phosphatase 2A 55 kDa regulatory subunit B delta isoform OS=Homo sapiens GN=PPP2R2D PE=2 SV=1	4	0.151661	24.1466	WT_GBA - CT	0.00987151	0.0471102	FALSE	no hit	7.04269
COASY	Q13057|Q13057-2	Bifunctional coenzyme A synthase OS=Homo sapiens GN=COASY PE=1 SV=4|Isoform 2 of Bifunctional coenzyme A synthase OS=Homo sapiens GN=COASY	8	-0.19366	24.2293	WT_GBA - CT	0.00991072	0.0472606	FALSE	no hit	7.17426
MPP7	Q5T2T1	MAGUK p55 subfamily member 7 OS=Homo sapiens GN=MPP7 PE=1 SV=1	8	0.177888	24.6393	WT_GBA - CT	0.00994658	0.0473948	FALSE	no hit	6.83034
ISOC2	K7EKW4|K7ENV7|Q96AB3|Q96AB3-2	Isochorismatase domain-containing protein 2 (Fragment) OS=Homo sapiens GN=ISOC2 PE=1 SV=1|Isochorismatase domain-containing protein 2 (Fragment) OS=Homo sapiens GN=ISOC2 PE=1 SV=7|Isochorismatase domain-containing protein 2 OS=Homo sapiens GN=ISOC2 PE=1 SV=1|Isoform 2 of Isochorismatase domain-containing protein 2 OS=Homo sapiens GN=ISOC2	3	0.344117	22.284	WT_GBA - CT	0.0100539	0.0478691	FALSE	no hit	6.2533
DCAF13	A0A087WT20|Q9NV06	DDB1- and CUL4-associated factor 13 OS=Homo sapiens GN=DCAF13 PE=1 SV=1|DDB1- and CUL4-associated factor 13 OS=Homo sapiens GN=DCAF13 PE=1 SV=2	4	0.265212	23.2683	WT_GBA - CT	0.0100799	0.0479557	FALSE	no hit	6.57404
UBA6	A0AVT1	Ubiquitin-like modifier-activating enzyme 6 OS=Homo sapiens GN=UBA6 PE=1 SV=1	19	-0.132281	26.349	WT_GBA - CT	0.0101065	0.0480449	FALSE	no hit	7.52204
TMEM168	Q9H0V1	Transmembrane protein 168 OS=Homo sapiens GN=TMEM168 PE=2 SV=2	2	0.395342	21.1671	WT_GBA - CT	0.0101161	0.0480536	FALSE	no hit	5.70513
MED30	Q96HR3	Mediator of RNA polymerase II transcription subunit 30 OS=Homo sapiens GN=MED30 PE=1 SV=1	2	-0.324966	22.6786	WT_GBA - CT	0.0101278	0.0480718	FALSE	no hit	6.09246
DDB2	Q92466	DNA damage-binding protein 2 OS=Homo sapiens GN=DDB2 PE=1 SV=1	6	-0.341707	24.7605	WT_GBA - CT	0.0102589	0.0486007	FALSE	no hit	6.95242
COX5A	P20674	Cytochrome c oxidase subunit 5A, mitochondrial OS=Homo sapiens GN=COX5A PE=1 SV=2	6	-0.359762	25.0345	WT_GBA - CT	0.0102613	0.0486007	FALSE	no hit	7.82515
PRPF38B	Q5VTL8	Pre-mRNA-splicing factor 38B OS=Homo sapiens GN=PRPF38B PE=1 SV=1	11	-0.156084	25.8424	WT_GBA - CT	0.010263	0.0486007	FALSE	no hit	7.17607
TJP2	Q9UDY2	Tight junction protein ZO-2 OS=Homo sapiens GN=TJP2 PE=1 SV=2	24	0.156176	26.595	WT_GBA - CT	0.010271	0.0486012	FALSE	no hit	7.05311
ORC6	Q9Y5N6	Origin recognition complex subunit 6 OS=Homo sapiens GN=ORC6 PE=1 SV=1	6	0.161232	24.6749	WT_GBA - CT	0.010318	0.0487601	FALSE	no hit	6.98091
RSRC2	Q7L4I2	Arginine/serine-rich coiled-coil protein 2 OS=Homo sapiens GN=RSRC2 PE=1 SV=1	9	-0.190378	25.3304	WT_GBA - CT	0.0103204	0.0487601	FALSE	no hit	7.13373
SZT2	Q5T011|Q5T011-5	Protein SZT2 OS=Homo sapiens GN=SZT2 PE=1 SV=3|Isoform 3 of Protein SZT2 OS=Homo sapiens GN=SZT2	2	0.338517	20.6476	WT_GBA - CT	0.0103447	0.0488352	FALSE	no hit	5.87602
ARHGAP1	Q07960	Rho GTPase-activating protein 1 OS=Homo sapiens GN=ARHGAP1 PE=1 SV=1	11	-0.193977	25.2557	WT_GBA - CT	0.0103522	0.0488352	FALSE	no hit	7.34073
PPIL2	Q13356	Peptidyl-prolyl cis-trans isomerase-like 2 OS=Homo sapiens GN=PPIL2 PE=1 SV=1	11	0.163874	25.3474	WT_GBA - CT	0.0103709	0.0488859	FALSE	no hit	6.854
TIMM9	Q9Y5J7	Mitochondrial import inner membrane translocase subunit Tim9 OS=Homo sapiens GN=TIMM9 PE=1 SV=1	4	0.198953	24.7901	WT_GBA - CT	0.0104115	0.0490194	FALSE	no hit	6.94114
C2ORF69	Q8N8R5	UPF0565 protein C2orf69 OS=Homo sapiens GN=C2orf69 PE=1 SV=1	3	-0.284828	20.8792	WT_GBA - CT	0.0104152	0.0490194	FALSE	no hit	6.0231
ITGA5	P08648	Integrin alpha-5 OS=Homo sapiens GN=ITGA5 PE=1 SV=2	2	-0.279502	22.9232	WT_GBA - CT	0.0104336	0.0490194	FALSE	no hit	6.08672
WBP4	O75554	WW domain-binding protein 4 OS=Homo sapiens GN=WBP4 PE=1 SV=1	5	-0.274728	24.1491	WT_GBA - CT	0.0104365	0.0490194	FALSE	no hit	6.64279
ELL	P55199	RNA polymerase II elongation factor ELL OS=Homo sapiens GN=ELL PE=1 SV=1	7	0.152151	23.8906	WT_GBA - CT	0.0104392	0.0490194	FALSE	no hit	6.5768
NT5C2	P49902	Cytosolic purine 5'-nucleotidase OS=Homo sapiens GN=NT5C2 PE=1 SV=1	6	0.214997	24.1081	WT_GBA - CT	0.0104736	0.0491435	FALSE	no hit	6.85642
U2AF2	P26368|P26368-2	Splicing factor U2AF 65 kDa subunit OS=Homo sapiens GN=U2AF2 PE=1 SV=4|Isoform 2 of Splicing factor U2AF 65 kDa subunit OS=Homo sapiens GN=U2AF2	14	-0.153794	25.8449	WT_GBA - CT	0.0104947	0.0492048	FALSE	no hit	7.99427
MSI1	O43347	RNA-binding protein Musashi homolog 1 OS=Homo sapiens GN=MSI1 PE=1 SV=1	4	-0.186595	23.8204	WT_GBA - CT	0.010558	0.0494641	FALSE	no hit	6.56899
ATM	Q13315	Serine-protein kinase ATM OS=Homo sapiens GN=ATM PE=1 SV=4	5	-0.279809	23.0502	WT_GBA - CT	0.010679	0.0499928	FALSE	no hit	5.91246
IREB2	A0A0A6YY96|P48200	Iron-responsive element-binding protein 2 OS=Homo sapiens GN=IREB2 PE=1 SV=1|Iron-responsive element-binding protein 2 OS=Homo sapiens GN=IREB2 PE=1 SV=3	3	-0.159447	23.4036	WT_GBA - CT	0.0107018	0.0500613	FALSE	no hit	7.11421
PANK2	Q9BZ23|Q9BZ23-3|Q9BZ23-4	Pantothenate kinase 2, mitochondrial OS=Homo sapiens GN=PANK2 PE=1 SV=3|Isoform 2 of Pantothenate kinase 2, mitochondrial OS=Homo sapiens GN=PANK2|Isoform 4 of Pantothenate kinase 2, mitochondrial OS=Homo sapiens GN=PANK2	2	-0.168494	22.0358	WT_GBA - CT	0.0107772	0.0503755	FALSE	no hit	6.40554
NUCKS1	Q9H1E3	Nuclear ubiquitous casein and cyclin-dependent kinase substrate 1 OS=Homo sapiens GN=NUCKS1 PE=1 SV=1	11	-0.361323	26.0518	WT_GBA - CT	0.0108435	0.0506471	FALSE	no hit	8.15073
NDC1	Q9BTX1|Q9BTX1-2|Q9BTX1-5|Q9BTX1-6	Nucleoporin NDC1 OS=Homo sapiens GN=NDC1 PE=1 SV=2|Isoform 2 of Nucleoporin NDC1 OS=Homo sapiens GN=NDC1|Isoform 5 of Nucleoporin NDC1 OS=Homo sapiens GN=NDC1|Isoform 6 of Nucleoporin NDC1 OS=Homo sapiens GN=NDC1	6	0.230267	25.1155	WT_GBA - CT	0.0108584	0.0506583	FALSE	no hit	7.03392
PDS5A	Q29RF7	Sister chromatid cohesion protein PDS5 homolog A OS=Homo sapiens GN=PDS5A PE=1 SV=1	39	-0.12922	27.4044	WT_GBA - CT	0.0108624	0.0506583	FALSE	no hit	7.53741
ATG16L1	E7EVC7|Q676U5|Q676U5-2	Autophagy-related protein 16-1 OS=Homo sapiens GN=ATG16L1 PE=1 SV=1|Autophagy-related protein 16-1 OS=Homo sapiens GN=ATG16L1 PE=1 SV=2|Isoform 2 of Autophagy-related protein 16-1 OS=Homo sapiens GN=ATG16L1	4	-0.142705	23.4707	WT_GBA - CT	0.0108865	0.0507078	FALSE	no hit	6.53213
SMARCAL1	Q9NZC9	SWI/SNF-related matrix-associated actin-dependent regulator of chromatin subfamily A-like protein 1 OS=Homo sapiens GN=SMARCAL1 PE=1 SV=1	2	-0.240652	21.3704	WT_GBA - CT	0.0108896	0.0507078	FALSE	no hit	5.63664
DHCR24|NBLA03646	Q15392|Q15392-2|Q3LIE7	Delta(24)-sterol reductase OS=Homo sapiens GN=DHCR24 PE=1 SV=2|Isoform 2 of Delta(24)-sterol reductase OS=Homo sapiens GN=DHCR24|Delta(24)-sterol reductase OS=Homo sapiens GN=Nbla03646 PE=1 SV=1	5	0.201445	23.869	WT_GBA - CT	0.0109096	0.0507627	FALSE	no hit	7.17112
SIRPA	P78324|P78324-2|P78324-4	Tyrosine-protein phosphatase non-receptor type substrate 1 OS=Homo sapiens GN=SIRPA PE=1 SV=2|Isoform 2 of Tyrosine-protein phosphatase non-receptor type substrate 1 OS=Homo sapiens GN=SIRPA|Isoform 4 of Tyrosine-protein phosphatase non-receptor type substrate 1 OS=Homo sapiens GN=SIRPA	2	-0.156801	23.099	WT_GBA - CT	0.0109419	0.0508742	FALSE	no hit	6.32335
TECPR1	Q7Z6L1|Q7Z6L1-2|Q7Z6L1-4	Tectonin beta-propeller repeat-containing protein 1 OS=Homo sapiens GN=TECPR1 PE=1 SV=1|Isoform 2 of Tectonin beta-propeller repeat-containing protein 1 OS=Homo sapiens GN=TECPR1|Isoform 4 of Tectonin beta-propeller repeat-containing protein 1 OS=Homo sapiens GN=TECPR1	3	-0.203393	23.0423	WT_GBA - CT	0.0109596	0.050918	FALSE	no hit	6.08097
BRD3	Q15059	Bromodomain-containing protein 3 OS=Homo sapiens GN=BRD3 PE=1 SV=1	11	-0.201192	25.097	WT_GBA - CT	0.0109776	0.0509633	FALSE	no hit	7.21805
GBAS	O75323	Protein NipSnap homolog 2 OS=Homo sapiens GN=GBAS PE=1 SV=1	8	-0.151249	25.2768	WT_GBA - CT	0.0109939	0.0510006	FALSE	no hit	7.23151
AARSD1	Q9BTE6	Alanyl-tRNA editing protein Aarsd1 OS=Homo sapiens GN=AARSD1 PE=1 SV=2	14	0.131366	25.6266	WT_GBA - CT	0.0110199	0.0510826	FALSE	no hit	7.25414
AUP1	Q9Y679|Q9Y679-2	Ancient ubiquitous protein 1 OS=Homo sapiens GN=AUP1 PE=1 SV=1|Isoform Short of Ancient ubiquitous protein 1 OS=Homo sapiens GN=AUP1	11	0.22562	25.2916	WT_GBA - CT	0.0110815	0.0513291	FALSE	no hit	7.43792
ARRB2	P32121|P32121-2|P32121-3|P32121-4|P32121-5	Beta-arrestin-2 OS=Homo sapiens GN=ARRB2 PE=1 SV=2|Isoform 3 of Beta-arrestin-2 OS=Homo sapiens GN=ARRB2|Isoform 2 of Beta-arrestin-2 OS=Homo sapiens GN=ARRB2|Isoform 4 of Beta-arrestin-2 OS=Homo sapiens GN=ARRB2|Isoform 5 of Beta-arrestin-2 OS=Homo sapiens GN=ARRB2	4	-0.161075	23.1308	WT_GBA - CT	0.0111385	0.0515188	FALSE	no hit	6.47229
CHMP2A	O43633	Charged multivesicular body protein 2a OS=Homo sapiens GN=CHMP2A PE=1 SV=1	11	0.185733	25.8285	WT_GBA - CT	0.0111392	0.0515188	FALSE	no hit	7.32959
PANK4	Q9NVE7	Pantothenate kinase 4 OS=Homo sapiens GN=PANK4 PE=1 SV=1	14	0.16776	25.5845	WT_GBA - CT	0.0111479	0.0515203	FALSE	no hit	6.79905
HTT	P42858	Huntingtin OS=Homo sapiens GN=HTT PE=1 SV=2	23	0.160612	26.1033	WT_GBA - CT	0.0113902	0.0526004	FALSE	no hit	7.0435
HABP4	Q5JVS0	Intracellular hyaluronan-binding protein 4 OS=Homo sapiens GN=HABP4 PE=1 SV=1	4	-0.318797	23.1482	WT_GBA - CT	0.0114064	0.0526147	FALSE	no hit	6.35444
SEPT9	Q9UHD8	Septin-9 OS=Homo sapiens GN=SEPT9 PE=1 SV=2	25	-0.146708	26.9255	WT_GBA - CT	0.0114104	0.0526147	FALSE	no hit	7.56216
ZNF428	M0QXZ5|Q96B54	Zinc finger protein 428 (Fragment) OS=Homo sapiens GN=ZNF428 PE=1 SV=1|Zinc finger protein 428 OS=Homo sapiens GN=ZNF428 PE=1 SV=2	4	0.203003	23.0855	WT_GBA - CT	0.0114199	0.052619	FALSE	no hit	7.0344
RTKN	Q9BST9	Rhotekin OS=Homo sapiens GN=RTKN PE=1 SV=2	6	-0.208282	23.1055	WT_GBA - CT	0.0115127	0.0529742	FALSE	no hit	6.35845
ABR	B7Z683	Active breakpoint cluster region-related protein OS=Homo sapiens GN=ABR PE=1 SV=1	5	-0.205323	23.2824	WT_GBA - CT	0.0115143	0.0529742	FALSE	no hit	6.30147
LAS1L	Q9Y4W2|Q9Y4W2-2	Isoform 2 of Ribosomal biogenesis protein LAS1L OS=Homo sapiens GN=LAS1L|Ribosomal biogenesis protein LAS1L OS=Homo sapiens GN=LAS1L PE=1 SV=2	13	0.215771	26.0665	WT_GBA - CT	0.0115381	0.0530444	FALSE	no hit	7.41763
TST	Q16762	Thiosulfate sulfurtransferase OS=Homo sapiens GN=TST PE=1 SV=4	9	-0.174936	24.863	WT_GBA - CT	0.0115635	0.0531211	FALSE	no hit	7.19928
PLEKHF2	Q9H8W4	Pleckstrin homology domain-containing family F member 2 OS=Homo sapiens GN=PLEKHF2 PE=1 SV=1	2	-0.172002	23.4178	WT_GBA - CT	0.011597	0.0532271	FALSE	no hit	6.6052
TOX4	O94842|O94842-2|O94842-3	TOX high mobility group box family member 4 OS=Homo sapiens GN=TOX4 PE=1 SV=1|Isoform 2 of TOX high mobility group box family member 4 OS=Homo sapiens GN=TOX4|Isoform 3 of TOX high mobility group box family member 4 OS=Homo sapiens GN=TOX4	7	0.15536	24.7115	WT_GBA - CT	0.0116121	0.0532271	FALSE	no hit	6.73924
RASA1	E9PGC0|P20936|P20936-2|P20936-4	Ras GTPase-activating protein 1 OS=Homo sapiens GN=RASA1 PE=1 SV=1|Ras GTPase-activating protein 1 OS=Homo sapiens GN=RASA1 PE=1 SV=1|Isoform 2 of Ras GTPase-activating protein 1 OS=Homo sapiens GN=RASA1|Isoform 4 of Ras GTPase-activating protein 1 OS=Homo sapiens GN=RASA1	5	0.191825	23.7446	WT_GBA - CT	0.0116195	0.0532271	FALSE	no hit	6.37418
CNOT6	Q9ULM6	CCR4-NOT transcription complex subunit 6 OS=Homo sapiens GN=CNOT6 PE=1 SV=2	2	-0.348929	20.9724	WT_GBA - CT	0.0116212	0.0532271	FALSE	no hit	6.01241
ETFA	P13804	Electron transfer flavoprotein subunit alpha, mitochondrial OS=Homo sapiens GN=ETFA PE=1 SV=1	14	-0.129551	26.826	WT_GBA - CT	0.0117413	0.053737	FALSE	no hit	7.96032
TRIM25	Q14258	E3 ubiquitin/ISG15 ligase TRIM25 OS=Homo sapiens GN=TRIM25 PE=1 SV=2	18	-0.180308	26.1497	WT_GBA - CT	0.0117544	0.0537568	FALSE	no hit	7.44309
RAB5C	P51148|P51148-2	Ras-related protein Rab-5C OS=Homo sapiens GN=RAB5C PE=1 SV=2|Isoform 2 of Ras-related protein Rab-5C OS=Homo sapiens GN=RAB5C	3	-0.163266	23.292	WT_GBA - CT	0.01181	0.0539711	FALSE	no hit	7.36217
CHMP7	Q8WUX9	Charged multivesicular body protein 7 OS=Homo sapiens GN=CHMP7 PE=1 SV=1	6	-0.146431	24.4156	WT_GBA - CT	0.0118283	0.0540146	FALSE	no hit	6.7201
PMM2	O15305	Phosphomannomutase 2 OS=Homo sapiens GN=PMM2 PE=1 SV=1	10	-0.228036	25.8884	WT_GBA - CT	0.011852	0.0540733	FALSE	no hit	7.11983
GPSM1	A0A0A0MSK4	G-protein-signaling modulator 1 OS=Homo sapiens GN=GPSM1 PE=1 SV=1	13	-0.161909	25.2113	WT_GBA - CT	0.0118588	0.0540733	FALSE	no hit	7.09859
GLCE	H0YNP1|O94923	D-glucuronyl C5-epimerase OS=Homo sapiens GN=GLCE PE=1 SV=1|D-glucuronyl C5-epimerase OS=Homo sapiens GN=GLCE PE=1 SV=3	3	-0.211112	22.6033	WT_GBA - CT	0.0118778	0.0540897	FALSE	no hit	6.28175
TIAM1	Q13009|Q13009-2	T-lymphoma invasion and metastasis-inducing protein 1 OS=Homo sapiens GN=TIAM1 PE=1 SV=2|Isoform 2 of T-lymphoma invasion and metastasis-inducing protein 1 OS=Homo sapiens GN=TIAM1	2	-0.25259	20.929	WT_GBA - CT	0.01188	0.0540897	FALSE	no hit	5.53012
BCAP31	C9J0M4|C9JMD7|C9JQ75|C9JSP1|P51572|P51572-2	B-cell receptor-associated protein 31 (Fragment) OS=Homo sapiens GN=BCAP31 PE=1 SV=1|B-cell receptor-associated protein 31 OS=Homo sapiens GN=BCAP31 PE=1 SV=3|Isoform 2 of B-cell receptor-associated protein 31 OS=Homo sapiens GN=BCAP31	21	0.145281	27.8233	WT_GBA - CT	0.0118893	0.0540921	FALSE	no hit	8.29
ZNF281	Q9Y2X9	Zinc finger protein 281 OS=Homo sapiens GN=ZNF281 PE=1 SV=1	9	0.194431	25.1546	WT_GBA - CT	0.0119001	0.054101	FALSE	no hit	6.78619
PDLIM3	Q53GG5-2	Isoform 2 of PDZ and LIM domain protein 3 OS=Homo sapiens GN=PDLIM3	8	-0.185711	24.9318	WT_GBA - CT	0.0119112	0.0541112	FALSE	no hit	6.85387
UBTD1	Q9HAC8	Ubiquitin domain-containing protein 1 OS=Homo sapiens GN=UBTD1 PE=1 SV=1	3	-0.266835	21.6152	WT_GBA - CT	0.0119338	0.0541742	FALSE	no hit	5.81466
ADK	P55263|P55263-3	Adenosine kinase OS=Homo sapiens GN=ADK PE=1 SV=2|Isoform 3 of Adenosine kinase OS=Homo sapiens GN=ADK	9	-0.196617	25.6231	WT_GBA - CT	0.0119728	0.054294	FALSE	no hit	7.44827
PEBP1	P30086	Phosphatidylethanolamine-binding protein 1 OS=Homo sapiens GN=PEBP1 PE=1 SV=3	12	-0.304037	26.8673	WT_GBA - CT	0.0119779	0.054294	FALSE	no hit	8.33119
TWISTNB	Q3B726	DNA-directed RNA polymerase I subunit RPA43 OS=Homo sapiens GN=TWISTNB PE=1 SV=1	4	0.230547	23.5797	WT_GBA - CT	0.0120126	0.0543982	FALSE	no hit	6.52773
TRAPPC11	Q7Z392|Q7Z392-3|Q7Z392-4	Trafficking protein particle complex subunit 11 OS=Homo sapiens GN=TRAPPC11 PE=1 SV=2|Isoform 3 of Trafficking protein particle complex subunit 11 OS=Homo sapiens GN=TRAPPC11|Isoform 4 of Trafficking protein particle complex subunit 11 OS=Homo sapiens GN=TRAPPC11	3	-0.186763	22.9876	WT_GBA - CT	0.0120339	0.0543982	FALSE	no hit	6.33666
AKT2	P31751	RAC-beta serine/threonine-protein kinase OS=Homo sapiens GN=AKT2 PE=1 SV=2	6	0.183775	24.5133	WT_GBA - CT	0.0120366	0.0543982	FALSE	no hit	7.22002
PSRC1	Q5T2Z1|Q6PGN9|Q6PGN9-2	Proline/serine-rich coiled-coil protein 1 (Fragment) OS=Homo sapiens GN=PSRC1 PE=1 SV=7|Proline/serine-rich coiled-coil protein 1 OS=Homo sapiens GN=PSRC1 PE=1 SV=1|Isoform A of Proline/serine-rich coiled-coil protein 1 OS=Homo sapiens GN=PSRC1	4	-0.202816	23.1836	WT_GBA - CT	0.0120452	0.0543982	FALSE	no hit	6.34432
LRRC59	Q96AG4	Leucine-rich repeat-containing protein 59 OS=Homo sapiens GN=LRRC59 PE=1 SV=1	19	0.291419	27.1983	WT_GBA - CT	0.0120492	0.0543982	FALSE	no hit	8.44742
PCMT1	A0A0A0MRJ6|C9J0F2|H7BY58|P22061|P22061-2	Protein-L-isoaspartate O-methyltransferase OS=Homo sapiens GN=PCMT1 PE=1 SV=1|Protein-L-isoaspartate(D-aspartate) O-methyltransferase (Fragment) OS=Homo sapiens GN=PCMT1 PE=1 SV=1|Protein-L-isoaspartate O-methyltransferase OS=Homo sapiens GN=PCMT1 PE=1 SV=1|Protein-L-isoaspartate(D-aspartate) O-methyltransferase OS=Homo sapiens GN=PCMT1 PE=1 SV=4|Isoform 2 of Protein-L-isoaspartate(D-aspartate) O…	13	-0.213755	25.8856	WT_GBA - CT	0.012054	0.0543982	FALSE	no hit	7.88099
CIC	I3L2J0	Protein capicua homolog OS=Homo sapiens GN=CIC PE=1 SV=1	6	-0.190256	23.2507	WT_GBA - CT	0.012073	0.0544439	FALSE	no hit	6.11996
CELF2	A0A0J9YXJ0|E9PC62	CUGBP Elav-like family member 2 OS=Homo sapiens GN=CELF2 PE=1 SV=1|CUGBP Elav-like family member 2 OS=Homo sapiens GN=CELF2 PE=1 SV=1	9	0.163418	25.1704	WT_GBA - CT	0.0121058	0.0545515	FALSE	no hit	7.2549
CDK2	G3V5T9|P24941|P24941-2	Cyclin-dependent kinase 2 OS=Homo sapiens GN=CDK2 PE=1 SV=1|Cyclin-dependent kinase 2 OS=Homo sapiens GN=CDK2 PE=1 SV=2|Isoform 2 of Cyclin-dependent kinase 2 OS=Homo sapiens GN=CDK2	7	-0.160382	24.3584	WT_GBA - CT	0.0121172	0.0545629	FALSE	no hit	7.2755
SDSL	Q96GA7	Serine dehydratase-like OS=Homo sapiens GN=SDSL PE=1 SV=1	6	0.134951	24.761	WT_GBA - CT	0.0121638	0.0547328	FALSE	no hit	7.02912
GCC2	B8ZZW2|Q8IWJ2	GRIP and coiled-coil domain-containing protein 2 (Fragment) OS=Homo sapiens GN=GCC2 PE=1 SV=1|GRIP and coiled-coil domain-containing protein 2 OS=Homo sapiens GN=GCC2 PE=1 SV=4	32	0.251591	26.7672	WT_GBA - CT	0.0122695	0.0551204	FALSE	no hit	7.20415
TCEB1	E5RHG8|Q15369	Transcription elongation factor B polypeptide 1 (Fragment) OS=Homo sapiens GN=TCEB1 PE=1 SV=1|Transcription elongation factor B polypeptide 1 OS=Homo sapiens GN=TCEB1 PE=1 SV=1	5	-0.156396	25.5655	WT_GBA - CT	0.0122739	0.0551204	FALSE	no hit	7.62285
COG4	J3KNI1|Q9H9E3	Conserved oligomeric Golgi complex subunit 4 OS=Homo sapiens GN=COG4 PE=1 SV=1|Conserved oligomeric Golgi complex subunit 4 OS=Homo sapiens GN=COG4 PE=1 SV=3	16	0.130183	25.7925	WT_GBA - CT	0.012277	0.0551204	FALSE	no hit	6.88388
HDDC2	Q7Z4H3	HD domain-containing protein 2 OS=Homo sapiens GN=HDDC2 PE=1 SV=1	7	-0.149857	25.0439	WT_GBA - CT	0.0122859	0.0551204	FALSE	no hit	7.44461
WDR45B	Q5MNZ6	WD repeat domain phosphoinositide-interacting protein 3 OS=Homo sapiens GN=WDR45B PE=2 SV=2	4	-0.149283	23.9846	WT_GBA - CT	0.012313	0.055202	FALSE	no hit	6.7968
HOXB6	P17509	Homeobox protein Hox-B6 OS=Homo sapiens GN=HOXB6 PE=1 SV=4	4	0.283464	23.2034	WT_GBA - CT	0.0123446	0.0553033	FALSE	no hit	6.53571
KHK	P50053|P50053-2	Ketohexokinase OS=Homo sapiens GN=KHK PE=1 SV=2|Isoform A of Ketohexokinase OS=Homo sapiens GN=KHK	3	-0.313811	22.7508	WT_GBA - CT	0.0124036	0.0554976	FALSE	no hit	6.53171
BCAS3	Q9H6U6-2|Q9H6U6-3|Q9H6U6-7|Q9H6U6-8	Isoform 1 of Breast carcinoma-amplified sequence 3 OS=Homo sapiens GN=BCAS3|Isoform 3 of Breast carcinoma-amplified sequence 3 OS=Homo sapiens GN=BCAS3|Isoform 5 of Breast carcinoma-amplified sequence 3 OS=Homo sapiens GN=BCAS3|Isoform 4 of Breast carcinoma-amplified sequence 3 OS=Homo sapiens GN=BCAS3	8	-0.168469	24.4699	WT_GBA - CT	0.0124061	0.0554976	FALSE	no hit	6.57618
TMEM259	Q4ZIN3|Q4ZIN3-2	Membralin OS=Homo sapiens GN=TMEM259 PE=1 SV=1|Isoform 2 of Membralin OS=Homo sapiens GN=TMEM259	2	-0.244132	23.0073	WT_GBA - CT	0.0124446	0.0556013	FALSE	no hit	6.90497
DCTN3	O75935|O75935-3|X6RCK5	Dynactin subunit 3 OS=Homo sapiens GN=DCTN3 PE=1 SV=1|Isoform 3 of Dynactin subunit 3 OS=Homo sapiens GN=DCTN3|Dynactin subunit 3 (Fragment) OS=Homo sapiens GN=DCTN3 PE=1 SV=1	7	-0.220475	24.8884	WT_GBA - CT	0.0124474	0.0556013	FALSE	no hit	7.3772
USP28	Q96RU2|Q96RU2-2	Ubiquitin carboxyl-terminal hydrolase 28 OS=Homo sapiens GN=USP28 PE=1 SV=1|Isoform 2 of Ubiquitin carboxyl-terminal hydrolase 28 OS=Homo sapiens GN=USP28	8	-0.170425	24.3728	WT_GBA - CT	0.0125331	0.0559436	FALSE	no hit	6.458
MYO9B	M0R0P8|Q13459|Q13459-2	Unconventional myosin-IXb OS=Homo sapiens GN=MYO9B PE=1 SV=1|Unconventional myosin-IXb OS=Homo sapiens GN=MYO9B PE=1 SV=3|Isoform Short of Unconventional myosin-IXb OS=Homo sapiens GN=MYO9B	12	-0.152898	24.8958	WT_GBA - CT	0.0125903	0.0561578	FALSE	no hit	6.4444
PAN3	Q58A45|Q58A45-3	PAB-dependent poly(A)-specific ribonuclease subunit PAN3 OS=Homo sapiens GN=PAN3 PE=1 SV=3|Isoform 3 of PAB-dependent poly(A)-specific ribonuclease subunit PAN3 OS=Homo sapiens GN=PAN3	4	-0.237207	22.7232	WT_GBA - CT	0.0126014	0.0561668	FALSE	no hit	6.39745
YEATS4	O95619	YEATS domain-containing protein 4 OS=Homo sapiens GN=YEATS4 PE=1 SV=1	8	0.14694	25.6232	WT_GBA - CT	0.0126676	0.0564207	FALSE	no hit	6.83511
HAUS8	Q9BT25|Q9BT25-3	HAUS augmin-like complex subunit 8 OS=Homo sapiens GN=HAUS8 PE=1 SV=3|Isoform 3 of HAUS augmin-like complex subunit 8 OS=Homo sapiens GN=HAUS8	8	-0.160776	24.6729	WT_GBA - CT	0.0126795	0.0564331	FALSE	no hit	6.83782
ACSL4	O60488|O60488-2	Long-chain-fatty-acid--CoA ligase 4 OS=Homo sapiens GN=ACSL4 PE=1 SV=2|Isoform Short of Long-chain-fatty-acid--CoA ligase 4 OS=Homo sapiens GN=ACSL4	10	-0.135077	25.4544	WT_GBA - CT	0.0126964	0.0564673	FALSE	no hit	6.9637
FLOT2	E7EMK3|J3QLD9|Q14254	Flotillin-2 OS=Homo sapiens GN=FLOT2 PE=1 SV=1|Flotillin-2 OS=Homo sapiens GN=FLOT2 PE=1 SV=1|Flotillin-2 OS=Homo sapiens GN=FLOT2 PE=1 SV=2	23	-0.254436	26.8735	WT_GBA - CT	0.0127083	0.0564791	FALSE	no hit	7.45062
SPTLC1	O15269	Serine palmitoyltransferase 1 OS=Homo sapiens GN=SPTLC1 PE=1 SV=1	11	0.150195	24.4831	WT_GBA - CT	0.012738	0.0565398	FALSE	no hit	7.11442
RDH11	Q8TC12	Retinol dehydrogenase 11 OS=Homo sapiens GN=RDH11 PE=1 SV=2	4	0.247574	23.5735	WT_GBA - CT	0.0127403	0.0565398	FALSE	no hit	6.73736
ZCCHC24	Q8N2G6	Zinc finger CCHC domain-containing protein 24 OS=Homo sapiens GN=ZCCHC24 PE=1 SV=1	2	-0.176346	22.6928	WT_GBA - CT	0.0128099	0.0568073	FALSE	no hit	6.42755
AHCYL2	Q96HN2|Q96HN2-2	Adenosylhomocysteinase 3 OS=Homo sapiens GN=AHCYL2 PE=1 SV=1|Isoform 2 of Adenosylhomocysteinase 3 OS=Homo sapiens GN=AHCYL2	5	0.15956	24.0716	WT_GBA - CT	0.0128353	0.0568753	FALSE	no hit	6.72819
HSPA9	P38646	Stress-70 protein, mitochondrial OS=Homo sapiens GN=HSPA9 PE=1 SV=2	43	0.16806	28.8819	WT_GBA - CT	0.0128437	0.0568753	FALSE	no hit	8.56439
INTS9	Q9NV88|Q9NV88-2|Q9NV88-3	Integrator complex subunit 9 OS=Homo sapiens GN=INTS9 PE=1 SV=2|Isoform 2 of Integrator complex subunit 9 OS=Homo sapiens GN=INTS9|Isoform 3 of Integrator complex subunit 9 OS=Homo sapiens GN=INTS9	4	0.157666	22.3018	WT_GBA - CT	0.0128688	0.0569453	FALSE	no hit	5.9858
DPF2	Q92785	Zinc finger protein ubi-d4 OS=Homo sapiens GN=DPF2 PE=1 SV=2	10	-0.194924	25.2103	WT_GBA - CT	0.0129402	0.0572199	FALSE	no hit	6.99879
MCM8	Q9UJA3|Q9UJA3-2|Q9UJA3-3|Q9UJA3-4	DNA helicase MCM8 OS=Homo sapiens GN=MCM8 PE=1 SV=2|Isoform 2 of DNA helicase MCM8 OS=Homo sapiens GN=MCM8|Isoform 3 of DNA helicase MCM8 OS=Homo sapiens GN=MCM8|Isoform 4 of DNA helicase MCM8 OS=Homo sapiens GN=MCM8	3	0.210983	21.4584	WT_GBA - CT	0.0129524	0.0572327	FALSE	no hit	5.87309
AAMP	C9JEH3|C9JG97|Q13685	Angio-associated migratory cell protein OS=Homo sapiens GN=AAMP PE=1 SV=1|Angio-associated migratory cell protein OS=Homo sapiens GN=AAMP PE=1 SV=1|Angio-associated migratory cell protein OS=Homo sapiens GN=AAMP PE=1 SV=2	10	0.159492	25.6006	WT_GBA - CT	0.0130253	0.0574544	FALSE	no hit	7.55895
PRCP	P42785|P42785-2	Lysosomal Pro-X carboxypeptidase OS=Homo sapiens GN=PRCP PE=1 SV=1|Isoform 2 of Lysosomal Pro-X carboxypeptidase OS=Homo sapiens GN=PRCP	4	-0.297831	23.6978	WT_GBA - CT	0.0130294	0.0574544	FALSE	no hit	6.68169
APH1A	Q96BI3|Q96BI3-2	Gamma-secretase subunit APH-1A OS=Homo sapiens GN=APH1A PE=1 SV=1|Isoform 2 of Gamma-secretase subunit APH-1A OS=Homo sapiens GN=APH1A	3	0.173854	22.9094	WT_GBA - CT	0.0130306	0.0574544	FALSE	no hit	6.58338
FAM50A	Q14320	Protein FAM50A OS=Homo sapiens GN=FAM50A PE=1 SV=2	15	-0.223948	26.8652	WT_GBA - CT	0.0130463	0.0574825	FALSE	no hit	7.68726
PFN1	K7EJ44|P07737	Profilin-1 OS=Homo sapiens GN=PFN1 PE=1 SV=2|Profilin OS=Homo sapiens GN=PFN1 PE=1 SV=1	11	-0.197543	26.3489	WT_GBA - CT	0.0130993	0.0576746	FALSE	no hit	8.18411
TTC27	Q6P3X3	Tetratricopeptide repeat protein 27 OS=Homo sapiens GN=TTC27 PE=1 SV=1	10	0.179356	25.2799	WT_GBA - CT	0.0131288	0.0577555	FALSE	no hit	6.93491
PMPCB	F8WEA6|O75439	Mitochondrial-processing peptidase subunit beta OS=Homo sapiens GN=PMPCB PE=1 SV=1|Mitochondrial-processing peptidase subunit beta OS=Homo sapiens GN=PMPCB PE=1 SV=2	13	0.153046	25.7677	WT_GBA - CT	0.0131365	0.0577555	FALSE	no hit	7.56274
GTPBP2	Q9BX10|Q9BX10-2|Q9BX10-4	GTP-binding protein 2 OS=Homo sapiens GN=GTPBP2 PE=1 SV=1|Isoform 2 of GTP-binding protein 2 OS=Homo sapiens GN=GTPBP2|Isoform 4 of GTP-binding protein 2 OS=Homo sapiens GN=GTPBP2	4	0.150471	23.4178	WT_GBA - CT	0.0131463	0.0577571	FALSE	no hit	6.49173
VPS4B	O75351	Vacuolar protein sorting-associated protein 4B OS=Homo sapiens GN=VPS4B PE=1 SV=2	11	-0.172763	25.43	WT_GBA - CT	0.0131717	0.0578272	FALSE	no hit	7.25335
MYO6	A0A0A0MRM8	Unconventional myosin-VI OS=Homo sapiens GN=MYO6 PE=1 SV=1	38	-0.179407	27.5519	WT_GBA - CT	0.0131836	0.0578382	FALSE	no hit	7.42405
PTGR2	Q8N8N7	Prostaglandin reductase 2 OS=Homo sapiens GN=PTGR2 PE=1 SV=1	5	-0.191835	23.9341	WT_GBA - CT	0.0132204	0.0579585	FALSE	no hit	7.01815
CCDC94	Q9BW85	Coiled-coil domain-containing protein 94 OS=Homo sapiens GN=CCDC94 PE=1 SV=1	8	0.169421	24.6779	WT_GBA - CT	0.0132399	0.0579803	FALSE	no hit	6.77596
PPP3CB	P16298|P16298-4	Serine/threonine-protein phosphatase 2B catalytic subunit beta isoform OS=Homo sapiens GN=PPP3CB PE=1 SV=2|Isoform 4 of Serine/threonine-protein phosphatase 2B catalytic subunit beta isoform OS=Homo sapiens GN=PPP3CB	2	-0.23251	22.1524	WT_GBA - CT	0.0132443	0.0579803	FALSE	no hit	6.24768
NDUFA11	Q86Y39	NADH dehydrogenase [ubiquinone] 1 alpha subcomplex subunit 11 OS=Homo sapiens GN=NDUFA11 PE=1 SV=3	2	0.290461	21.3037	WT_GBA - CT	0.0132556	0.0579886	FALSE	no hit	6.06099
HMGB1	P09429	High mobility group protein B1 OS=Homo sapiens GN=HMGB1 PE=1 SV=3	14	-0.215843	27.7553	WT_GBA - CT	0.0132707	0.0580132	FALSE	no hit	8.53692
SPIRE1	Q08AE8|Q08AE8-2	Protein spire homolog 1 OS=Homo sapiens GN=SPIRE1 PE=1 SV=3|Isoform 2 of Protein spire homolog 1 OS=Homo sapiens GN=SPIRE1	4	-0.196988	22.4314	WT_GBA - CT	0.0132802	0.0580136	FALSE	no hit	6.17945
POLR2L	P62875	DNA-directed RNA polymerases I, II, and III subunit RPABC5 OS=Homo sapiens GN=POLR2L PE=1 SV=1	2	0.13959	23.2636	WT_GBA - CT	0.0133232	0.0581599	FALSE	no hit	6.40882
UBAC2	Q8NBM4|Q8NBM4-2|Q8NBM4-3|Q8NBM4-4	Ubiquitin-associated domain-containing protein 2 OS=Homo sapiens GN=UBAC2 PE=1 SV=1|Isoform 2 of Ubiquitin-associated domain-containing protein 2 OS=Homo sapiens GN=UBAC2|Isoform 3 of Ubiquitin-associated domain-containing protein 2 OS=Homo sapiens GN=UBAC2|Isoform 4 of Ubiquitin-associated domain-containing protein 2 OS=Homo sapiens GN=UBAC2	3	-0.37713	22.7703	WT_GBA - CT	0.013382	0.0583601	FALSE	no hit	6.74442
HNRNPUL1	M0R247|Q9BUJ2|Q9BUJ2-2	Heterogeneous nuclear ribonucleoprotein U-like protein 1 OS=Homo sapiens GN=HNRNPUL1 PE=1 SV=1|Heterogeneous nuclear ribonucleoprotein U-like protein 1 OS=Homo sapiens GN=HNRNPUL1 PE=1 SV=2|Isoform 2 of Heterogeneous nuclear ribonucleoprotein U-like protein 1 OS=Homo sapiens GN=HNRNPUL1	29	-0.16694	27.1829	WT_GBA - CT	0.0133881	0.0583601	FALSE	no hit	7.60115
RNF213	A0A0A0MTC1|A0A0A0MTR7|Q63HN8|Q63HN8-4	E3 ubiquitin-protein ligase RNF213 OS=Homo sapiens GN=RNF213 PE=1 SV=1|E3 ubiquitin-protein ligase RNF213 OS=Homo sapiens GN=RNF213 PE=1 SV=1|E3 ubiquitin-protein ligase RNF213 OS=Homo sapiens GN=RNF213 PE=1 SV=3|Isoform 2 of E3 ubiquitin-protein ligase RNF213 OS=Homo sapiens GN=RNF213	24	-0.329959	25.5375	WT_GBA - CT	0.0134312	0.0584808	FALSE	no hit	6.52992
POGLUT1	Q8NBL1	Protein O-glucosyltransferase 1 OS=Homo sapiens GN=POGLUT1 PE=1 SV=1	4	-0.186843	23.9205	WT_GBA - CT	0.013436	0.0584808	FALSE	no hit	6.69785
FARSA	Q9Y285	Phenylalanine--tRNA ligase alpha subunit OS=Homo sapiens GN=FARSA PE=1 SV=3	18	0.149495	26.4662	WT_GBA - CT	0.0134455	0.0584808	FALSE	no hit	7.42614
MRPL48	Q96GC5|Q96GC5-3	39S ribosomal protein L48, mitochondrial OS=Homo sapiens GN=MRPL48 PE=1 SV=2|Isoform 2 of 39S ribosomal protein L48, mitochondrial OS=Homo sapiens GN=MRPL48	5	0.179091	24.7424	WT_GBA - CT	0.0134684	0.0584808	FALSE	no hit	7.29883
MRPS7	J3QLS3|Q9Y2R9	28S ribosomal protein S7, mitochondrial OS=Homo sapiens GN=MRPS7 PE=1 SV=1|28S ribosomal protein S7, mitochondrial OS=Homo sapiens GN=MRPS7 PE=1 SV=2	7	0.146242	25.1883	WT_GBA - CT	0.0134716	0.0584808	FALSE	no hit	7.21314
PSEN1	P49768|P49768-2	Presenilin-1 OS=Homo sapiens GN=PSEN1 PE=1 SV=1|Isoform 2 of Presenilin-1 OS=Homo sapiens GN=PSEN1	2	0.228734	22.2312	WT_GBA - CT	0.0134729	0.0584808	FALSE	no hit	6.24762
ZZEF1	O43149	Zinc finger ZZ-type and EF-hand domain-containing protein 1 OS=Homo sapiens GN=ZZEF1 PE=1 SV=6	9	-0.152667	24.8076	WT_GBA - CT	0.0134916	0.0585207	FALSE	no hit	6.68666
HJURP	C9JWC4|Q8NCD3|Q8NCD3-2|Q8NCD3-3	Holliday junction recognition protein (Fragment) OS=Homo sapiens GN=HJURP PE=1 SV=1|Holliday junction recognition protein OS=Homo sapiens GN=HJURP PE=1 SV=2|Isoform 2 of Holliday junction recognition protein OS=Homo sapiens GN=HJURP|Isoform 3 of Holliday junction recognition protein OS=Homo sapiens GN=HJURP	2	-0.166395	22.4267	WT_GBA - CT	0.0135269	0.0585768	FALSE	no hit	6.15396
ANXA2	P07355|P07355-2	Annexin A2 OS=Homo sapiens GN=ANXA2 PE=1 SV=2|Isoform 2 of Annexin A2 OS=Homo sapiens GN=ANXA2	24	0.141829	27.4578	WT_GBA - CT	0.0135391	0.0585768	FALSE	no hit	8.31409
GFM1	Q96RP9|Q96RP9-2	Elongation factor G, mitochondrial OS=Homo sapiens GN=GFM1 PE=1 SV=2|Isoform 2 of Elongation factor G, mitochondrial OS=Homo sapiens GN=GFM1	19	0.139777	26.4802	WT_GBA - CT	0.0135433	0.0585768	FALSE	no hit	7.16307
PHF10	Q8WUB8|Q8WUB8-2|Q8WUB8-3	PHD finger protein 10 OS=Homo sapiens GN=PHF10 PE=1 SV=3|Isoform 2 of PHD finger protein 10 OS=Homo sapiens GN=PHF10|Isoform 3 of PHD finger protein 10 OS=Homo sapiens GN=PHF10	9	-0.168201	25.2656	WT_GBA - CT	0.0135502	0.0585768	FALSE	no hit	7.12581
SSFA2	E9PHV5|P28290|P28290-2	Sperm-specific antigen 2 OS=Homo sapiens GN=SSFA2 PE=1 SV=1|Sperm-specific antigen 2 OS=Homo sapiens GN=SSFA2 PE=1 SV=3|Isoform 2 of Sperm-specific antigen 2 OS=Homo sapiens GN=SSFA2	2	-0.191853	22.2144	WT_GBA - CT	0.0135522	0.0585768	FALSE	no hit	6.02422
PATL1	Q86TB9|Q86TB9-4	Protein PAT1 homolog 1 OS=Homo sapiens GN=PATL1 PE=1 SV=2|Isoform 4 of Protein PAT1 homolog 1 OS=Homo sapiens GN=PATL1	10	-0.158381	24.9334	WT_GBA - CT	0.0136421	0.0588872	FALSE	no hit	6.83278
TFPT	A0A024R4Q5|G5E9B5|P0C1Z6	TCF3 (E2A) fusion partner (In childhood Leukemia), isoform CRA_c OS=Homo sapiens GN=TFPT PE=1 SV=1|TCF3 (E2A) fusion partner (In childhood Leukemia), isoform CRA_b OS=Homo sapiens GN=TFPT PE=1 SV=1|TCF3 fusion partner OS=Homo sapiens GN=TFPT PE=1 SV=1	2	0.177451	22.3132	WT_GBA - CT	0.0136454	0.0588872	FALSE	no hit	6.2184
MCM4	P33991	DNA replication licensing factor MCM4 OS=Homo sapiens GN=MCM4 PE=1 SV=5	35	0.188636	27.4862	WT_GBA - CT	0.0136528	0.0588872	FALSE	no hit	7.82875
PRIM1	P49642	DNA primase small subunit OS=Homo sapiens GN=PRIM1 PE=1 SV=1	11	0.133323	25.5945	WT_GBA - CT	0.0137127	0.059104	FALSE	no hit	7.25712
NCAPD2	Q15021	Condensin complex subunit 1 OS=Homo sapiens GN=NCAPD2 PE=1 SV=3	29	-0.137753	26.8441	WT_GBA - CT	0.01373	0.0591372	FALSE	no hit	7.44825
ADAM9	Q13443	Disintegrin and metalloproteinase domain-containing protein 9 OS=Homo sapiens GN=ADAM9 PE=1 SV=1	8	-0.174264	24.8992	WT_GBA - CT	0.0137705	0.05927	FALSE	no hit	6.63927
CPSF7	Q8N684|Q8N684-2|Q8N684-3	Cleavage and polyadenylation specificity factor subunit 7 OS=Homo sapiens GN=CPSF7 PE=1 SV=1|Isoform 2 of Cleavage and polyadenylation specificity factor subunit 7 OS=Homo sapiens GN=CPSF7|Isoform 3 of Cleavage and polyadenylation specificity factor subunit 7 OS=Homo sapiens GN=CPSF7	14	-0.135285	25.5295	WT_GBA - CT	0.0139207	0.0598746	FALSE	no hit	7.37465
SUCO	Q9UBS9	SUN domain-containing ossification factor OS=Homo sapiens GN=SUCO PE=1 SV=1	3	0.234275	22.8247	WT_GBA - CT	0.0140502	0.0603895	FALSE	no hit	6.0577
MVK	F5H8H2|Q03426	Mevalonate kinase OS=Homo sapiens GN=MVK PE=1 SV=1|Mevalonate kinase OS=Homo sapiens GN=MVK PE=1 SV=1	2	0.131762	22.9526	WT_GBA - CT	0.0140666	0.0604177	FALSE	no hit	5.97996
SMG9	Q9H0W8	Protein SMG9 OS=Homo sapiens GN=SMG9 PE=1 SV=1	10	0.23648	24.8124	WT_GBA - CT	0.0140951	0.0604975	FALSE	no hit	7.0676
HBS1L	Q9Y450|Q9Y450-2	HBS1-like protein OS=Homo sapiens GN=HBS1L PE=1 SV=1|Isoform 2 of HBS1-like protein OS=Homo sapiens GN=HBS1L	22	-0.139133	26.3259	WT_GBA - CT	0.0141257	0.0605866	FALSE	no hit	7.28796
SMAP	O00193	Small acidic protein OS=Homo sapiens GN=SMAP PE=1 SV=1	4	-0.406636	26.031	WT_GBA - CT	0.0141565	0.0606766	FALSE	no hit	7.10701
CDK13	Q14004|Q14004-2	Cyclin-dependent kinase 13 OS=Homo sapiens GN=CDK13 PE=1 SV=2|Isoform 2 of Cyclin-dependent kinase 13 OS=Homo sapiens GN=CDK13	11	-0.140301	25.5113	WT_GBA - CT	0.0142352	0.0609303	FALSE	no hit	6.86523
CUL5	Q93034	Cullin-5 OS=Homo sapiens GN=CUL5 PE=1 SV=4	18	-0.145788	26.2306	WT_GBA - CT	0.0142433	0.0609303	FALSE	no hit	7.0343
MRPS18A	Q5QPA5|Q9NVS2|Q9NVS2-2	28S ribosomal protein S18a, mitochondrial (Fragment) OS=Homo sapiens GN=MRPS18A PE=1 SV=8|28S ribosomal protein S18a, mitochondrial OS=Homo sapiens GN=MRPS18A PE=1 SV=1|Isoform 2 of 28S ribosomal protein S18a, mitochondrial OS=Homo sapiens GN=MRPS18A	6	0.150586	24.7981	WT_GBA - CT	0.0142455	0.0609303	FALSE	no hit	7.18257
SRCIN1	A0A087WVV7|A0A087X165|Q9C0H9|Q9C0H9-2|Q9C0H9-5	SRC kinase-signaling inhibitor 1 (Fragment) OS=Homo sapiens GN=SRCIN1 PE=1 SV=1|SRC kinase-signaling inhibitor 1 OS=Homo sapiens GN=SRCIN1 PE=1 SV=1|SRC kinase signaling inhibitor 1 OS=Homo sapiens GN=SRCIN1 PE=1 SV=3|Isoform 2 of SRC kinase signaling inhibitor 1 OS=Homo sapiens GN=SRCIN1|Isoform 4 of SRC kinase signaling inhibitor 1 OS=Homo sapiens GN=SRCIN1	4	-0.168967	22.3383	WT_GBA - CT	0.0142897	0.0610769	FALSE	no hit	5.74946
RAB11B	Q15907	Ras-related protein Rab-11B OS=Homo sapiens GN=RAB11B PE=1 SV=4	2	-0.23892	22.4659	WT_GBA - CT	0.014329	0.0612023	FALSE	no hit	6.5854
CNPY3	Q9BT09	Protein canopy homolog 3 OS=Homo sapiens GN=CNPY3 PE=1 SV=1	11	0.231642	25.7929	WT_GBA - CT	0.0143718	0.0613422	FALSE	no hit	7.36023
NUP54	Q7Z3B4|Q7Z3B4-3	Nucleoporin p54 OS=Homo sapiens GN=NUP54 PE=1 SV=2|Isoform 3 of Nucleoporin p54 OS=Homo sapiens GN=NUP54	15	-0.143362	25.4706	WT_GBA - CT	0.0144176	0.061495	FALSE	no hit	7.0995
CCDC137	Q6PK04	Coiled-coil domain-containing protein 137 OS=Homo sapiens GN=CCDC137 PE=1 SV=1	8	-0.198494	24.7063	WT_GBA - CT	0.0144357	0.0615295	FALSE	no hit	6.93176
MTERF4	Q7Z6M4	Transcription termination factor 4, mitochondrial OS=Homo sapiens GN=MTERF4 PE=1 SV=3	2	-0.200232	22.1151	WT_GBA - CT	0.014498	0.0617524	FALSE	no hit	6.13205
MAP4K4	A0A0D9SEY1|E7ESS2|O95819-3	Mitogen-activated protein kinase kinase kinase kinase 4 OS=Homo sapiens GN=MAP4K4 PE=1 SV=1|Mitogen-activated protein kinase kinase kinase kinase 4 OS=Homo sapiens GN=MAP4K4 PE=1 SV=3|Isoform 3 of Mitogen-activated protein kinase kinase kinase kinase 4 OS=Homo sapiens GN=MAP4K4	14	0.126967	25.3962	WT_GBA - CT	0.0145487	0.0618583	FALSE	no hit	6.83245
STX12	Q86Y82	Syntaxin-12 OS=Homo sapiens GN=STX12 PE=1 SV=1	6	-0.145834	24.227	WT_GBA - CT	0.014561	0.0618583	FALSE	no hit	6.99289
MRPL24	Q96A35	39S ribosomal protein L24, mitochondrial OS=Homo sapiens GN=MRPL24 PE=1 SV=1	10	0.137704	25.1047	WT_GBA - CT	0.0145624	0.0618583	FALSE	no hit	7.25854
FAM114A2	Q9NRY5	Protein FAM114A2 OS=Homo sapiens GN=FAM114A2 PE=1 SV=4	11	0.134245	25.3162	WT_GBA - CT	0.0145632	0.0618583	FALSE	no hit	7.17253
DTNA	Q9Y4J8-14	Isoform 14 of Dystrobrevin alpha OS=Homo sapiens GN=DTNA	4	-0.199438	23.3096	WT_GBA - CT	0.0145815	0.0618935	FALSE	no hit	6.25351
NME4	A0A087WVT9|F2Z2X0|H0Y6J0|O00746|Q4TT34	Nucleoside diphosphate kinase OS=Homo sapiens GN=NME4 PE=1 SV=1|Nucleoside diphosphate kinase OS=Homo sapiens GN=NME4 PE=1 SV=1|Nucleoside diphosphate kinase, mitochondrial (Fragment) OS=Homo sapiens GN=NME4 PE=1 SV=1|Nucleoside diphosphate kinase, mitochondrial OS=Homo sapiens GN=NME4 PE=1 SV=1|Nucleoside diphosphate kinase OS=Homo sapiens GN=NME4 PE=1 SV=1	2	-0.164771	22.2021	WT_GBA - CT	0.0146074	0.0619604	FALSE	no hit	6.44074
TCF25	Q9BQ70	Transcription factor 25 OS=Homo sapiens GN=TCF25 PE=1 SV=1	3	0.183282	22.5185	WT_GBA - CT	0.0147182	0.0623476	FALSE	no hit	6.56928
COQ3	Q5T063|Q9NZJ6	Ubiquinone biosynthesis O-methyltransferase, mitochondrial OS=Homo sapiens GN=COQ3 PE=1 SV=2|Ubiquinone biosynthesis O-methyltransferase, mitochondrial OS=Homo sapiens GN=COQ3 PE=1 SV=3	3	0.288764	21.5886	WT_GBA - CT	0.014719	0.0623476	FALSE	no hit	6.12349
ATP6V0A1	Q93050|Q93050-1|Q93050-3	V-type proton ATPase 116 kDa subunit a isoform 1 OS=Homo sapiens GN=ATP6V0A1 PE=1 SV=3|Isoform 2 of V-type proton ATPase 116 kDa subunit a isoform 1 OS=Homo sapiens GN=ATP6V0A1|Isoform 3 of V-type proton ATPase 116 kDa subunit a isoform 1 OS=Homo sapiens GN=ATP6V0A1	11	-0.270861	24.9084	WT_GBA - CT	0.0147469	0.0623818	FALSE	no hit	6.88212
RRP9	O43818	U3 small nucleolar RNA-interacting protein 2 OS=Homo sapiens GN=RRP9 PE=1 SV=1	7	0.186486	24.7201	WT_GBA - CT	0.0147474	0.0623818	FALSE	no hit	6.90895
EPHB2	B1AKC9|P29323|P29323-2|P29323-3	Ephrin type-B receptor 2 OS=Homo sapiens GN=EPHB2 PE=1 SV=1|Ephrin type-B receptor 2 OS=Homo sapiens GN=EPHB2 PE=1 SV=5|Isoform 2 of Ephrin type-B receptor 2 OS=Homo sapiens GN=EPHB2|Isoform 3 of Ephrin type-B receptor 2 OS=Homo sapiens GN=EPHB2	2	-0.243568	22.4544	WT_GBA - CT	0.0147931	0.062532	FALSE	no hit	6.1154
CEP350	Q5VT06	Centrosome-associated protein 350 OS=Homo sapiens GN=CEP350 PE=1 SV=1	11	0.147795	24.3426	WT_GBA - CT	0.0148073	0.0625492	FALSE	no hit	5.98776
NFATC1	O95644|O95644-10|O95644-11|O95644-2|O95644-3|O95644-4|O95644-5|O95644-6|O95644-8	Nuclear factor of activated T-cells, cytoplasmic 1 OS=Homo sapiens GN=NFATC1 PE=1 SV=3|Isoform IA-deltaIX of Nuclear factor of activated T-cells, cytoplasmic 1 OS=Homo sapiens GN=NFATC1|Isoform IB-deltaIX of Nuclear factor of activated T-cells, cytoplasmic 1 OS=Homo sapiens GN=NFATC1|Isoform A-alpha of Nuclear factor of activated T-cells, cytoplasmic 1 OS=Homo sapiens GN=NFATC1|Isoform A-beta of …	2	-0.210693	21.4634	WT_GBA - CT	0.0148268	0.0625883	FALSE	no hit	5.78386
RBM4	Q9BWF3	RNA-binding protein 4 OS=Homo sapiens GN=RBM4 PE=1 SV=1	4	-0.173397	24.0424	WT_GBA - CT	0.0148576	0.0626756	FALSE	no hit	7.26223
TXNDC5	Q8NBS9	Thioredoxin domain-containing protein 5 OS=Homo sapiens GN=TXNDC5 PE=1 SV=2	17	0.188977	26.6599	WT_GBA - CT	0.0148695	0.0626824	FALSE	no hit	8.02415
TCP11L1	E9PJ55	T-complex protein 11-like protein 1 OS=Homo sapiens GN=TCP11L1 PE=1 SV=1	3	-0.230632	23.238	WT_GBA - CT	0.0149007	0.062771	FALSE	no hit	6.42969
DCK	P27707	Deoxycytidine kinase OS=Homo sapiens GN=DCK PE=1 SV=1	5	-0.236189	23.5401	WT_GBA - CT	0.0149306	0.062854	FALSE	no hit	6.3778
FTSJ1	Q9UET6|Q9UET6-2	Putative tRNA (cytidine(32)/guanosine(34)-2'-O)-methyltransferase OS=Homo sapiens GN=FTSJ1 PE=1 SV=2|Isoform 2 of Putative tRNA (cytidine(32)/guanosine(34)-2'-O)-methyltransferase OS=Homo sapiens GN=FTSJ1	4	0.235141	22.9837	WT_GBA - CT	0.0150287	0.0632235	FALSE	no hit	6.76548
WNK1	F5GWT4|Q9H4A3|Q9H4A3-2|Q9H4A3-5|Q9H4A3-6|Q9H4A3-7	Serine/threonine-protein kinase WNK1 OS=Homo sapiens GN=WNK1 PE=1 SV=1|Serine/threonine-protein kinase WNK1 OS=Homo sapiens GN=WNK1 PE=1 SV=2|Isoform 2 of Serine/threonine-protein kinase WNK1 OS=Homo sapiens GN=WNK1|Isoform 4 of Serine/threonine-protein kinase WNK1 OS=Homo sapiens GN=WNK1|Isoform 5 of Serine/threonine-protein kinase WNK1 OS=Homo sapiens GN=WNK1|Isoform 6 of Serine/threonine-prote…	30	-0.124234	27.0508	WT_GBA - CT	0.0150394	0.063225	FALSE	no hit	7.24594
C19ORF54	Q5BKX5	UPF0692 protein C19orf54 OS=Homo sapiens GN=C19orf54 PE=1 SV=2	2	0.296028	21.4367	WT_GBA - CT	0.0150846	0.063372	FALSE	no hit	6.36043
NGLY1	A0A0C4DFP4|H0Y2P2|Q96IV0|Q96IV0-2|Q96IV0-3|Q96IV0-5	Isoform 2 of Peptide-N(4)-(N-acetyl-beta-glucosaminyl)asparagine amidase OS=Homo sapiens GN=NGLY1|Isoform 3 of Peptide-N(4)-(N-acetyl-beta-glucosaminyl)asparagine amidase OS=Homo sapiens GN=NGLY1|Isoform 5 of Peptide-N(4)-(N-acetyl-beta-glucosaminyl)asparagine amidase OS=Homo sapiens GN=NGLY1|Peptide-N(4)-(N-acetyl-beta-glucosaminyl)asparagine amidase (Fragment) OS=Homo sapiens GN=NGLY1 PE=1 SV=1…	4	0.132733	23.9558	WT_GBA - CT	0.0151326	0.0635302	FALSE	no hit	6.59831
GYS1	P13807|P13807-2	Glycogen [starch] synthase, muscle OS=Homo sapiens GN=GYS1 PE=1 SV=2|Isoform 2 of Glycogen [starch] synthase, muscle OS=Homo sapiens GN=GYS1	13	-0.169063	25.7382	WT_GBA - CT	0.0151557	0.0635837	FALSE	no hit	7.22405
N6AMT1	B2RA97|Q9Y5N5	HemK methyltransferase family member 2 OS=Homo sapiens GN=N6AMT1 PE=1 SV=1|HemK methyltransferase family member 2 OS=Homo sapiens GN=N6AMT1 PE=1 SV=3	2	-0.174173	23.0214	WT_GBA - CT	0.0151782	0.0636296	FALSE	no hit	6.49822
CCPG1	Q9ULG6|Q9ULG6-2|Q9ULG6-5	Cell cycle progression protein 1 OS=Homo sapiens GN=CCPG1 PE=1 SV=3|Isoform 2 of Cell cycle progression protein 1 OS=Homo sapiens GN=CCPG1|Isoform 5 of Cell cycle progression protein 1 OS=Homo sapiens GN=CCPG1	2	0.136805	22.3836	WT_GBA - CT	0.0151874	0.0636296	FALSE	no hit	5.9798
BCOR	Q6W2J9|Q6W2J9-2|Q6W2J9-4	BCL-6 corepressor OS=Homo sapiens GN=BCOR PE=1 SV=1|Isoform 2 of BCL-6 corepressor OS=Homo sapiens GN=BCOR|Isoform 4 of BCL-6 corepressor OS=Homo sapiens GN=BCOR	22	0.137157	26.2924	WT_GBA - CT	0.0152064	0.0636345	FALSE	no hit	6.7175
SCRN2	J3QL71|Q96FV2	Secernin-2 OS=Homo sapiens GN=SCRN2 PE=1 SV=1|Secernin-2 OS=Homo sapiens GN=SCRN2 PE=1 SV=3	4	-0.264154	23.588	WT_GBA - CT	0.0152093	0.0636345	FALSE	no hit	6.38244
C9ORF114	Q5T280	Putative methyltransferase C9orf114 OS=Homo sapiens GN=C9orf114 PE=1 SV=3	6	-0.224898	24.6344	WT_GBA - CT	0.0152528	0.0637731	FALSE	no hit	6.86359
EMC4	H0YK61|H0YNK0|H0YNK8|Q5J8M3|Q5J8M3-2|Q5J8M3-3|S4R329	ER membrane protein complex subunit 4 OS=Homo sapiens GN=EMC4 PE=1 SV=1|ER membrane protein complex subunit 4 OS=Homo sapiens GN=EMC4 PE=1 SV=1|ER membrane protein complex subunit 4 OS=Homo sapiens GN=EMC4 PE=1 SV=1|ER membrane protein complex subunit 4 OS=Homo sapiens GN=EMC4 PE=1 SV=2|Isoform 2 of ER membrane protein complex subunit 4 OS=Homo sapiens GN=EMC4|Isoform 3 of ER membrane protein com…	3	0.23406	24.2375	WT_GBA - CT	0.0152734	0.0638159	FALSE	no hit	7.03109
HINT3	Q9NQE9	Histidine triad nucleotide-binding protein 3 OS=Homo sapiens GN=HINT3 PE=1 SV=1	4	0.16424	23.8328	WT_GBA - CT	0.015287	0.0638294	FALSE	no hit	6.88668
ID4	A0A087WXF2|P47928	DNA-binding protein inhibitor ID-4 OS=Homo sapiens GN=ID4 PE=1 SV=1|DNA-binding protein inhibitor ID-4 OS=Homo sapiens GN=ID4 PE=1 SV=1	2	-0.264659	22.8805	WT_GBA - CT	0.0153437	0.0640225	FALSE	no hit	6.58376
VAPB	O95292	Vesicle-associated membrane protein-associated protein B/C OS=Homo sapiens GN=VAPB PE=1 SV=3	11	0.159965	26.0463	WT_GBA - CT	0.015375	0.0640699	FALSE	no hit	7.90555
WDR70	Q9NW82	WD repeat-containing protein 70 OS=Homo sapiens GN=WDR70 PE=1 SV=1	25	0.149968	26.5692	WT_GBA - CT	0.0153759	0.0640699	FALSE	no hit	7.19048
MAP7D1	Q3KQU3|Q3KQU3-4	MAP7 domain-containing protein 1 OS=Homo sapiens GN=MAP7D1 PE=1 SV=1|Isoform 4 of MAP7 domain-containing protein 1 OS=Homo sapiens GN=MAP7D1	16	-0.181968	25.3509	WT_GBA - CT	0.015461	0.064341	FALSE	no hit	6.85348
KBTBD4	A0A075B6T4|Q9NVX7|Q9NVX7-2	Kelch repeat and BTB domain-containing protein 4 OS=Homo sapiens GN=KBTBD4 PE=1 SV=1|Kelch repeat and BTB domain-containing protein 4 OS=Homo sapiens GN=KBTBD4 PE=1 SV=3|Isoform 2 of Kelch repeat and BTB domain-containing protein 4 OS=Homo sapiens GN=KBTBD4	2	0.138518	22.37	WT_GBA - CT	0.0154619	0.064341	FALSE	no hit	6.21782
ITPA	Q9BY32	Inosine triphosphate pyrophosphatase OS=Homo sapiens GN=ITPA PE=1 SV=2	4	0.188003	22.6799	WT_GBA - CT	0.0154759	0.0643554	FALSE	no hit	6.84267
HPRT1	P00492	Hypoxanthine-guanine phosphoribosyltransferase OS=Homo sapiens GN=HPRT1 PE=1 SV=2	10	-0.12579	26.1136	WT_GBA - CT	0.0155805	0.0647467	FALSE	no hit	7.9893
CYFIP1	Q7L576	Cytoplasmic FMR1-interacting protein 1 OS=Homo sapiens GN=CYFIP1 PE=1 SV=1	9	-0.139302	24.8413	WT_GBA - CT	0.0156647	0.0650196	FALSE	no hit	6.76208
SMCHD1	A6NHR9|J3KTL8	Structural maintenance of chromosomes flexible hinge domain-containing protein 1 OS=Homo sapiens GN=SMCHD1 PE=1 SV=2|Structural maintenance of chromosomes flexible hinge domain-containing protein 1 (Fragment) OS=Homo sapiens GN=SMCHD1 PE=1 SV=1	39	-0.169818	27.3099	WT_GBA - CT	0.0156674	0.0650196	FALSE	no hit	7.12732
COQ7	H3BP28|I3L1T0|Q99807	5-demethoxyubiquinone hydroxylase, mitochondrial OS=Homo sapiens GN=COQ7 PE=1 SV=1|5-demethoxyubiquinone hydroxylase, mitochondrial OS=Homo sapiens GN=COQ7 PE=1 SV=1|5-demethoxyubiquinone hydroxylase, mitochondrial OS=Homo sapiens GN=COQ7 PE=1 SV=3	4	0.179306	23.45	WT_GBA - CT	0.0157695	0.0653991	FALSE	no hit	6.5253
MED22	E7EN96|E9PGW7|Q15528|Q15528-2|Q5T8T7|Q5T8T8	Mediator of RNA polymerase II transcription subunit 22 (Fragment) OS=Homo sapiens GN=MED22 PE=1 SV=1|Mediator of RNA polymerase II transcription subunit 22 (Fragment) OS=Homo sapiens GN=MED22 PE=1 SV=1|Mediator of RNA polymerase II transcription subunit 22 OS=Homo sapiens GN=MED22 PE=1 SV=2|Isoform Surf5A of Mediator of RNA polymerase II transcription subunit 22 OS=Homo sapiens GN=MED22|Mediator …	4	-0.227582	23.6099	WT_GBA - CT	0.0158158	0.0655062	FALSE	no hit	6.56297
PITRM1	Q5JRX3|Q5JRX3-2	Presequence protease, mitochondrial OS=Homo sapiens GN=PITRM1 PE=1 SV=3|Isoform 2 of Presequence protease, mitochondrial OS=Homo sapiens GN=PITRM1	30	0.127117	27.0184	WT_GBA - CT	0.0158166	0.0655062	FALSE	no hit	7.51399
PPP4R4	Q6NUP7	Serine/threonine-protein phosphatase 4 regulatory subunit 4 OS=Homo sapiens GN=PPP4R4 PE=1 SV=1	3	-0.270089	22.3796	WT_GBA - CT	0.0158615	0.0656476	FALSE	no hit	5.75978
MOB1B|MOB1A	Q7L9L4|Q7L9L4-2|Q9H8S9	MOB kinase activator 1B OS=Homo sapiens GN=MOB1B PE=1 SV=3|Isoform 2 of MOB kinase activator 1B OS=Homo sapiens GN=MOB1B|MOB kinase activator 1A OS=Homo sapiens GN=MOB1A PE=1 SV=4	5	-0.150218	24.0939	WT_GBA - CT	0.0159026	0.0657734	FALSE	no hit	7.39594
CDC2L1|CDK11B	B7ZVY7|J3QR44|P21127|P21127-2	Cell division cycle 2-like 1 (PITSLRE proteins) OS=Homo sapiens GN=CDC2L1 PE=1 SV=1|Cyclin-dependent kinase 11B OS=Homo sapiens GN=CDK11B PE=1 SV=2|Cyclin-dependent kinase 11B OS=Homo sapiens GN=CDK11B PE=1 SV=3|Isoform SV1 of Cyclin-dependent kinase 11B OS=Homo sapiens GN=CDK11B	2	0.138155	23.6586	WT_GBA - CT	0.0159635	0.0659812	FALSE	no hit	6.95729
UBA1	P22314	Ubiquitin-like modifier-activating enzyme 1 OS=Homo sapiens GN=UBA1 PE=1 SV=3	41	-0.122799	28.2271	WT_GBA - CT	0.0159868	0.0660327	FALSE	no hit	8.30469
CSK	P41240	Tyrosine-protein kinase CSK OS=Homo sapiens GN=CSK PE=1 SV=1	13	-0.146425	26.2268	WT_GBA - CT	0.01603	0.0661669	FALSE	no hit	7.43793
BAT3|BAG6	A0A024RCR6|A0A0G2JK23|P46379|P46379-2|P46379-3	HLA-B associated transcript 3, isoform CRA_a OS=Homo sapiens GN=BAT3 PE=1 SV=1|Large proline-rich protein BAG6 OS=Homo sapiens GN=BAG6 PE=1 SV=1|Large proline-rich protein BAG6 OS=Homo sapiens GN=BAG6 PE=1 SV=2|Isoform 2 of Large proline-rich protein BAG6 OS=Homo sapiens GN=BAG6|Isoform 3 of Large proline-rich protein BAG6 OS=Homo sapiens GN=BAG6	23	0.156307	26.1312	WT_GBA - CT	0.0160508	0.066208	FALSE	no hit	7.52225
NDUFS7	O75251	NADH dehydrogenase [ubiquinone] iron-sulfur protein 7, mitochondrial OS=Homo sapiens GN=NDUFS7 PE=1 SV=3	4	0.248771	24.2074	WT_GBA - CT	0.0161012	0.0663012	FALSE	no hit	7.20053
SLAIN1	A0A0A0MSS3|Q8ND83	SLAIN motif-containing protein 1 OS=Homo sapiens GN=SLAIN1 PE=1 SV=1|SLAIN motif-containing protein 1 OS=Homo sapiens GN=SLAIN1 PE=1 SV=3	6	-0.1641	24.7618	WT_GBA - CT	0.0161094	0.0663012	FALSE	no hit	6.55669
BSDC1	Q9NW68|Q9NW68-2	BSD domain-containing protein 1 OS=Homo sapiens GN=BSDC1 PE=1 SV=1|Isoform 2 of BSD domain-containing protein 1 OS=Homo sapiens GN=BSDC1	3	-0.280528	23.3399	WT_GBA - CT	0.0161168	0.0663012	FALSE	no hit	6.5633
LRCH4	O75427	Leucine-rich repeat and calponin homology domain-containing protein 4 OS=Homo sapiens GN=LRCH4 PE=1 SV=2	4	0.192966	22.725	WT_GBA - CT	0.0161188	0.0663012	FALSE	no hit	6.22144
B3GLCT	Q6Y288	Beta-1,3-glucosyltransferase OS=Homo sapiens GN=B3GLCT PE=1 SV=2	3	-0.276273	22.1724	WT_GBA - CT	0.0161316	0.0663012	FALSE	no hit	6.15564
BPGM	P07738	Bisphosphoglycerate mutase OS=Homo sapiens GN=BPGM PE=1 SV=2	6	0.188926	23.5548	WT_GBA - CT	0.0161381	0.0663012	FALSE	no hit	6.68377
GTF2E1	P29083	General transcription factor IIE subunit 1 OS=Homo sapiens GN=GTF2E1 PE=1 SV=2	6	-0.152895	23.6189	WT_GBA - CT	0.0163136	0.0669772	FALSE	no hit	6.46363
TPM1	H7BYY1|P09493-3|P09493-4	Tropomyosin 1 (Alpha), isoform CRA_m OS=Homo sapiens GN=TPM1 PE=1 SV=1|Isoform 3 of Tropomyosin alpha-1 chain OS=Homo sapiens GN=TPM1|Isoform 4 of Tropomyosin alpha-1 chain OS=Homo sapiens GN=TPM1	17	-0.181829	26.896	WT_GBA - CT	0.0163361	0.0670106	FALSE	no hit	7.48436
C9ORF40	Q8IXQ3	Uncharacterized protein C9orf40 OS=Homo sapiens GN=C9orf40 PE=1 SV=1	2	-0.187795	22.0956	WT_GBA - CT	0.0163435	0.0670106	FALSE	no hit	6.3526
PAK1	Q13153	Serine/threonine-protein kinase PAK 1 OS=Homo sapiens GN=PAK1 PE=1 SV=2	10	0.130705	25.5368	WT_GBA - CT	0.0164192	0.0672759	FALSE	no hit	7.18125
ITGA1	P56199	Integrin alpha-1 OS=Homo sapiens GN=ITGA1 PE=1 SV=2	2	-0.207878	22.8914	WT_GBA - CT	0.0164537	0.0673722	FALSE	no hit	6.59951
TSEN34	A0A024R4N9|E7EQB3|Q9BSV6	tRNA-splicing endonuclease subunit Sen34 OS=Homo sapiens GN=TSEN34 PE=1 SV=1|tRNA-splicing endonuclease subunit Sen34 OS=Homo sapiens GN=TSEN34 PE=1 SV=2|tRNA-splicing endonuclease subunit Sen34 OS=Homo sapiens GN=TSEN34 PE=1 SV=1	4	0.163613	24.0674	WT_GBA - CT	0.0164897	0.0674748	FALSE	no hit	7.14387
TFRC	P02786	Transferrin receptor protein 1 OS=Homo sapiens GN=TFRC PE=1 SV=2	24	0.17132	26.6103	WT_GBA - CT	0.016538	0.0676273	FALSE	no hit	7.58418
RBM17	Q96I25	Splicing factor 45 OS=Homo sapiens GN=RBM17 PE=1 SV=1	15	-0.144625	25.7426	WT_GBA - CT	0.0165742	0.0676843	FALSE	no hit	7.41
VCPIP1	Q96JH7	Deubiquitinating protein VCIP135 OS=Homo sapiens GN=VCPIP1 PE=1 SV=2	15	-0.165251	25.3793	WT_GBA - CT	0.0165845	0.0676843	FALSE	no hit	6.58318
MRPS18B	Q9Y676	28S ribosomal protein S18b, mitochondrial OS=Homo sapiens GN=MRPS18B PE=1 SV=1	6	0.221961	23.7957	WT_GBA - CT	0.016585	0.0676843	FALSE	no hit	7.1675
GORASP2	Q9H8Y8	Golgi reassembly-stacking protein 2 OS=Homo sapiens GN=GORASP2 PE=1 SV=3	9	0.203833	25.2966	WT_GBA - CT	0.0165962	0.0676851	FALSE	no hit	7.50683
MRPL13	Q9BYD1	39S ribosomal protein L13, mitochondrial OS=Homo sapiens GN=MRPL13 PE=1 SV=1	6	0.215606	24.1327	WT_GBA - CT	0.0166575	0.0678903	FALSE	no hit	6.91214
C11ORF54	Q9H0W9|Q9H0W9-2	Ester hydrolase C11orf54 OS=Homo sapiens GN=C11orf54 PE=1 SV=1|Isoform 2 of Ester hydrolase C11orf54 OS=Homo sapiens GN=C11orf54	3	0.15013	23.9475	WT_GBA - CT	0.0166907	0.0679803	FALSE	no hit	6.70059
ARHGEF2	Q92974|Q92974-2|V9GYF0	Rho guanine nucleotide exchange factor 2 OS=Homo sapiens GN=ARHGEF2 PE=1 SV=4|Isoform 2 of Rho guanine nucleotide exchange factor 2 OS=Homo sapiens GN=ARHGEF2|Rho guanine nucleotide exchange factor 2 (Fragment) OS=Homo sapiens GN=ARHGEF2 PE=1 SV=1	29	0.139506	26.3659	WT_GBA - CT	0.016712	0.0680219	FALSE	no hit	7.4873
AP5B1	Q2VPB7	AP-5 complex subunit beta-1 OS=Homo sapiens GN=AP5B1 PE=1 SV=4	3	0.237353	22.2435	WT_GBA - CT	0.016766	0.068188	FALSE	no hit	5.83814
RAC3	P60763	Ras-related C3 botulinum toxin substrate 3 OS=Homo sapiens GN=RAC3 PE=1 SV=1	3	-0.311214	24.0519	WT_GBA - CT	0.016775	0.068188	FALSE	no hit	7.25648
FBXL20	J3KTA1|Q96IG2|Q96IG2-2	F-box and leucine-rich repeat protein 20, isoform CRA_a OS=Homo sapiens GN=FBXL20 PE=1 SV=1|F-box/LRR-repeat protein 20 OS=Homo sapiens GN=FBXL20 PE=1 SV=2|Isoform 2 of F-box/LRR-repeat protein 20 OS=Homo sapiens GN=FBXL20	3	-0.132834	22.6099	WT_GBA - CT	0.0167894	0.0682014	FALSE	no hit	6.11926
AIFM2	Q9BRQ8	Apoptosis-inducing factor 2 OS=Homo sapiens GN=AIFM2 PE=1 SV=1	2	0.287752	21.6515	WT_GBA - CT	0.0168064	0.0682252	FALSE	no hit	6.26697
IQCB1	Q15051	IQ calmodulin-binding motif-containing protein 1 OS=Homo sapiens GN=IQCB1 PE=1 SV=1	6	-0.226117	24.4394	WT_GBA - CT	0.0168718	0.0684456	FALSE	no hit	6.6103
PPM1E	Q8WY54|Q8WY54-2|Q8WY54-3	Protein phosphatase 1E OS=Homo sapiens GN=PPM1E PE=1 SV=2|Isoform 2 of Protein phosphatase 1E OS=Homo sapiens GN=PPM1E|Isoform 3 of Protein phosphatase 1E OS=Homo sapiens GN=PPM1E	2	-0.238176	22.7169	WT_GBA - CT	0.0169372	0.0686531	FALSE	no hit	6.63604
KIF20A	O95235	Kinesin-like protein KIF20A OS=Homo sapiens GN=KIF20A PE=1 SV=1	6	0.189478	22.9706	WT_GBA - CT	0.0169476	0.0686531	FALSE	no hit	6.26947
GPATCH11	A0A0A0MSF9|Q8N954	G patch domain-containing protein 11 OS=Homo sapiens GN=GPATCH11 PE=1 SV=1|G patch domain-containing protein 11 OS=Homo sapiens GN=GPATCH11 PE=1 SV=3	6	-0.2701	25.0314	WT_GBA - CT	0.0169565	0.0686531	FALSE	no hit	6.96207
NRCAM	C9JYY6|F8W775|Q92823|Q92823-2|Q92823-3|Q92823-4|Q92823-5|Q92823-6	Neuronal cell adhesion molecule OS=Homo sapiens GN=NRCAM PE=1 SV=3|Neuronal cell adhesion molecule OS=Homo sapiens GN=NRCAM PE=1 SV=2|Neuronal cell adhesion molecule OS=Homo sapiens GN=NRCAM PE=1 SV=3|Isoform 2 of Neuronal cell adhesion molecule OS=Homo sapiens GN=NRCAM|Isoform 3 of Neuronal cell adhesion molecule OS=Homo sapiens GN=NRCAM|Isoform 4 of Neuronal cell adhesion molecule OS=Homo sapie…	11	0.283455	25.2827	WT_GBA - CT	0.0170429	0.0689574	FALSE	no hit	6.66878
AKAP10	E7EMD6|O43572	A-kinase anchor protein 10, mitochondrial OS=Homo sapiens GN=AKAP10 PE=1 SV=3|A-kinase anchor protein 10, mitochondrial OS=Homo sapiens GN=AKAP10 PE=1 SV=2	3	-0.197911	22.4791	WT_GBA - CT	0.01708	0.0690622	FALSE	no hit	5.89287
ATAT1	Q5SQI0|Q5SQI0-2|Q5SQI0-3|Q5SQI0-4|Q5SQI0-5|Q5SQI0-6|Q5SQI0-7	Alpha-tubulin N-acetyltransferase 1 OS=Homo sapiens GN=ATAT1 PE=1 SV=1|Isoform 2 of Alpha-tubulin N-acetyltransferase 1 OS=Homo sapiens GN=ATAT1|Isoform 3 of Alpha-tubulin N-acetyltransferase 1 OS=Homo sapiens GN=ATAT1|Isoform 4 of Alpha-tubulin N-acetyltransferase 1 OS=Homo sapiens GN=ATAT1|Isoform 5 of Alpha-tubulin N-acetyltransferase 1 OS=Homo sapiens GN=ATAT1|Isoform 6 of Alpha-tubulin N-ace…	2	0.147255	22.8017	WT_GBA - CT	0.017098	0.0690894	FALSE	no hit	6.60581
MUS81	E9PRI1|H0YDE3|Q96NY9	Crossover junction endonuclease MUS81 OS=Homo sapiens GN=MUS81 PE=1 SV=1|Crossover junction endonuclease MUS81 (Fragment) OS=Homo sapiens GN=MUS81 PE=1 SV=1|Crossover junction endonuclease MUS81 OS=Homo sapiens GN=MUS81 PE=1 SV=3	2	0.27504	21.8668	WT_GBA - CT	0.0171518	0.0692485	FALSE	no hit	6.03419
TBC1D10B	Q4KMP7	TBC1 domain family member 10B OS=Homo sapiens GN=TBC1D10B PE=1 SV=3	10	-0.140441	24.8505	WT_GBA - CT	0.0171629	0.0692485	FALSE	no hit	6.86884
RARS	P54136|P54136-2	Arginine--tRNA ligase, cytoplasmic OS=Homo sapiens GN=RARS PE=1 SV=2|Isoform Monomeric of Arginine--tRNA ligase, cytoplasmic OS=Homo sapiens GN=RARS	33	0.161014	27.8771	WT_GBA - CT	0.0171712	0.0692485	FALSE	no hit	8.0851
HMGB3	O15347	High mobility group protein B3 OS=Homo sapiens GN=HMGB3 PE=1 SV=4	10	-0.152769	26.405	WT_GBA - CT	0.0172595	0.0695588	FALSE	no hit	7.70538
KIAA0391	O15091|O15091-2	Mitochondrial ribonuclease P protein 3 OS=Homo sapiens GN=KIAA0391 PE=1 SV=2|Isoform 2 of Mitochondrial ribonuclease P protein 3 OS=Homo sapiens GN=KIAA0391	4	-0.19729	23.3374	WT_GBA - CT	0.017272	0.0695637	FALSE	no hit	6.59314
ATP6AP2	H7C3E1|O75787|O75787-2	Isoform 2 of Renin receptor OS=Homo sapiens GN=ATP6AP2|Renin receptor (Fragment) OS=Homo sapiens GN=ATP6AP2 PE=1 SV=1|Renin receptor OS=Homo sapiens GN=ATP6AP2 PE=1 SV=2	8	-0.122055	24.578	WT_GBA - CT	0.0172892	0.0695873	FALSE	no hit	7.09127
SLC25A13	Q9UJS0|Q9UJS0-2	Calcium-binding mitochondrial carrier protein Aralar2 OS=Homo sapiens GN=SLC25A13 PE=1 SV=2|Isoform 2 of Calcium-binding mitochondrial carrier protein Aralar2 OS=Homo sapiens GN=SLC25A13	13	0.414127	25.3714	WT_GBA - CT	0.0173255	0.0696383	FALSE	no hit	7.28043
PKM	P14618|P14618-2	Isoform M1 of Pyruvate kinase PKM OS=Homo sapiens GN=PKM|Pyruvate kinase PKM OS=Homo sapiens GN=PKM PE=1 SV=4	50	-0.134562	29.1306	WT_GBA - CT	0.0173269	0.0696383	FALSE	no hit	8.81182
DHODH	Q02127	Dihydroorotate dehydrogenase (quinone), mitochondrial OS=Homo sapiens GN=DHODH PE=1 SV=3	7	0.174553	24.1437	WT_GBA - CT	0.0173359	0.0696383	FALSE	no hit	6.59915
RAC1	P63000|P63000-2	Ras-related C3 botulinum toxin substrate 1 OS=Homo sapiens GN=RAC1 PE=1 SV=1|Isoform B of Ras-related C3 botulinum toxin substrate 1 OS=Homo sapiens GN=RAC1	5	-0.200814	24.5723	WT_GBA - CT	0.0173578	0.0696807	FALSE	no hit	7.71313
BCL11A	Q9H165|Q9H165-2|Q9H165-6	B-cell lymphoma/leukemia 11A OS=Homo sapiens GN=BCL11A PE=1 SV=2|Isoform 2 of B-cell lymphoma/leukemia 11A OS=Homo sapiens GN=BCL11A|Isoform 6 of B-cell lymphoma/leukemia 11A OS=Homo sapiens GN=BCL11A	2	0.173169	22.3677	WT_GBA - CT	0.0174013	0.0697586	FALSE	no hit	6.36417
MKRN2	C9J494|Q9H000	Probable E3 ubiquitin-protein ligase makorin-2 OS=Homo sapiens GN=MKRN2 PE=1 SV=1|Probable E3 ubiquitin-protein ligase makorin-2 OS=Homo sapiens GN=MKRN2 PE=1 SV=2	12	0.134953	25.5238	WT_GBA - CT	0.0174054	0.0697586	FALSE	no hit	7.03803
EPS15	P42566	Epidermal growth factor receptor substrate 15 OS=Homo sapiens GN=EPS15 PE=1 SV=2	31	0.127058	26.7017	WT_GBA - CT	0.0174112	0.0697586	FALSE	no hit	7.2029
DNM2	P50570-4	Isoform 4 of Dynamin-2 OS=Homo sapiens GN=DNM2	22	-0.122682	26.1856	WT_GBA - CT	0.0174781	0.0699809	FALSE	no hit	7.56366
BCKDHB	P21953	2-oxoisovalerate dehydrogenase subunit beta, mitochondrial OS=Homo sapiens GN=BCKDHB PE=1 SV=2	3	-0.190699	24.0532	WT_GBA - CT	0.0175727	0.0703026	FALSE	no hit	6.64195
PLCB3	Q01970	1-phosphatidylinositol 4,5-bisphosphate phosphodiesterase beta-3 OS=Homo sapiens GN=PLCB3 PE=1 SV=2	15	-0.164793	25.2259	WT_GBA - CT	0.017591	0.0703026	FALSE	no hit	6.97267
RAB9A	P51151	Ras-related protein Rab-9A OS=Homo sapiens GN=RAB9A PE=1 SV=1	4	-0.193095	22.6068	WT_GBA - CT	0.017593	0.0703026	FALSE	no hit	6.80714
STXBP1	P61764|P61764-2	Syntaxin-binding protein 1 OS=Homo sapiens GN=STXBP1 PE=1 SV=1|Isoform 2 of Syntaxin-binding protein 1 OS=Homo sapiens GN=STXBP1	13	-0.165262	25.6682	WT_GBA - CT	0.0176043	0.0703026	FALSE	no hit	7.10464
NDUFAF4	Q9P032	NADH dehydrogenase [ubiquinone] 1 alpha subcomplex assembly factor 4 OS=Homo sapiens GN=NDUFAF4 PE=1 SV=1	9	0.229091	25.5494	WT_GBA - CT	0.0176793	0.0705564	FALSE	no hit	7.46497
GAA	P10253	Lysosomal alpha-glucosidase OS=Homo sapiens GN=GAA PE=1 SV=4	7	-0.294325	24.7242	WT_GBA - CT	0.0176938	0.0705686	FALSE	no hit	6.81949
TRIM65	Q6PJ69	Tripartite motif-containing protein 65 OS=Homo sapiens GN=TRIM65 PE=1 SV=3	7	-0.306889	24.3491	WT_GBA - CT	0.017724	0.0706252	FALSE	no hit	6.85738
RSL24D1	Q9UHA3	Probable ribosome biogenesis protein RLP24 OS=Homo sapiens GN=RSL24D1 PE=1 SV=1	2	0.224014	23.0182	WT_GBA - CT	0.017731	0.0706252	FALSE	no hit	7.06084
NPC1	O15118	Niemann-Pick C1 protein OS=Homo sapiens GN=NPC1 PE=1 SV=2	8	0.231379	24.8427	WT_GBA - CT	0.0177526	0.0706651	FALSE	no hit	6.8716
CLIC1	O00299	Chloride intracellular channel protein 1 OS=Homo sapiens GN=CLIC1 PE=1 SV=4	11	0.290659	25.0063	WT_GBA - CT	0.0177954	0.0707898	FALSE	no hit	7.94332
PRMT3	O60678	Protein arginine N-methyltransferase 3 OS=Homo sapiens GN=PRMT3 PE=1 SV=3	8	-0.131746	24.8971	WT_GBA - CT	0.0178183	0.0708132	FALSE	no hit	6.99993
RYR2	H7BY35|Q92736|Q92736-2	Ryanodine receptor 2 OS=Homo sapiens GN=RYR2 PE=1 SV=2|Ryanodine receptor 2 OS=Homo sapiens GN=RYR2 PE=1 SV=3|Isoform 2 of Ryanodine receptor 2 OS=Homo sapiens GN=RYR2	2	-0.193031	22.7083	WT_GBA - CT	0.0178351	0.0708132	FALSE	no hit	6.80992
KIAA1524	A0A087X211|Q8TCG1	Protein CIP2A OS=Homo sapiens GN=KIAA1524 PE=1 SV=1|Protein CIP2A OS=Homo sapiens GN=KIAA1524 PE=1 SV=2	22	-0.133644	26.3182	WT_GBA - CT	0.0178397	0.0708132	FALSE	no hit	7.15167
LGALS1	P09382	Galectin-1 OS=Homo sapiens GN=LGALS1 PE=1 SV=2	2	-0.409739	22.0008	WT_GBA - CT	0.0178474	0.0708132	FALSE	no hit	6.13731
GJA1	P17302	Gap junction alpha-1 protein OS=Homo sapiens GN=GJA1 PE=1 SV=2	2	0.210692	22.2335	WT_GBA - CT	0.0179383	0.0711277	FALSE	no hit	6.14565
AVEN	Q9NQS1	Cell death regulator Aven OS=Homo sapiens GN=AVEN PE=1 SV=1	8	-0.139991	24.7021	WT_GBA - CT	0.0179932	0.0712536	FALSE	no hit	6.50576
ERVK3	A0A0U1RQS5|A0A0U1RQV1|B3KNS4	Protein ERVK3-1 (Fragment) OS=Homo sapiens GN=ERVK3-1 PE=1 SV=1|Protein ERVK3-1 (Fragment) OS=Homo sapiens GN=ERVK3-1 PE=1 SV=1|HCG2043597, isoform CRA_a OS=Homo sapiens GN=ERVK3-1 PE=1 SV=1	4	0.184735	23.844	WT_GBA - CT	0.0180089	0.0712536	FALSE	no hit	6.53285
HOXA10	P31260	Homeobox protein Hox-A10 OS=Homo sapiens GN=HOXA10 PE=1 SV=3	2	0.136785	22.9684	WT_GBA - CT	0.0180123	0.0712536	FALSE	no hit	6.11031
CADM4	Q8NFZ8	Cell adhesion molecule 4 OS=Homo sapiens GN=CADM4 PE=1 SV=1	4	-0.338765	22.8095	WT_GBA - CT	0.0180164	0.0712536	FALSE	no hit	6.33289
MTMR14	Q8NCE2|Q8NCE2-2|Q8NCE2-3	Myotubularin-related protein 14 OS=Homo sapiens GN=MTMR14 PE=1 SV=2|Isoform 2 of Myotubularin-related protein 14 OS=Homo sapiens GN=MTMR14|Isoform 3 of Myotubularin-related protein 14 OS=Homo sapiens GN=MTMR14	8	0.140248	24.7063	WT_GBA - CT	0.0180555	0.0713508	FALSE	no hit	6.63229
RFC1	P35251|P35251-2	Replication factor C subunit 1 OS=Homo sapiens GN=RFC1 PE=1 SV=4|Isoform 2 of Replication factor C subunit 1 OS=Homo sapiens GN=RFC1	23	-0.15359	26.8179	WT_GBA - CT	0.0180642	0.0713508	FALSE	no hit	7.25709
POLR3C	Q9BUI4	DNA-directed RNA polymerase III subunit RPC3 OS=Homo sapiens GN=POLR3C PE=1 SV=1	12	0.143809	25.7808	WT_GBA - CT	0.0180831	0.0713533	FALSE	no hit	7.2658
RP2	O75695	Protein XRP2 OS=Homo sapiens GN=RP2 PE=1 SV=4	8	-0.215738	25.0046	WT_GBA - CT	0.0180881	0.0713533	FALSE	no hit	6.97861
MINPP1	Q9UNW1	Multiple inositol polyphosphate phosphatase 1 OS=Homo sapiens GN=MINPP1 PE=1 SV=1	8	0.150481	25.3485	WT_GBA - CT	0.0181038	0.0713694	FALSE	no hit	6.81127
CCDC59	Q9P031	Thyroid transcription factor 1-associated protein 26 OS=Homo sapiens GN=CCDC59 PE=1 SV=2	4	-0.206028	24.163	WT_GBA - CT	0.0181884	0.0716571	FALSE	no hit	6.74891
MPI	H3BPB8|P34949	Mannose-6-phosphate isomerase OS=Homo sapiens GN=MPI PE=1 SV=1|Mannose-6-phosphate isomerase OS=Homo sapiens GN=MPI PE=1 SV=2	10	-0.147446	25.0272	WT_GBA - CT	0.0182302	0.0717756	FALSE	no hit	7.61101
UACA	H0YNH8|Q9BZF9|Q9BZF9-2	Uveal autoantigen with coiled-coil domains and ankyrin repeats OS=Homo sapiens GN=UACA PE=1 SV=1|Uveal autoantigen with coiled-coil domains and ankyrin repeats OS=Homo sapiens GN=UACA PE=1 SV=2|Isoform 2 of Uveal autoantigen with coiled-coil domains and ankyrin repeats OS=Homo sapiens GN=UACA	26	-0.172726	26.3614	WT_GBA - CT	0.0182722	0.071895	FALSE	no hit	7.06024
UBA2	Q9UBT2	SUMO-activating enzyme subunit 2 OS=Homo sapiens GN=UBA2 PE=1 SV=2	31	-0.135257	27.1837	WT_GBA - CT	0.0183743	0.0722501	FALSE	no hit	8.00785
SIL1	Q9H173	Nucleotide exchange factor SIL1 OS=Homo sapiens GN=SIL1 PE=1 SV=1	3	0.317125	23.773	WT_GBA - CT	0.0184667	0.072567	FALSE	no hit	6.98342
PPCS	Q9HAB8	Phosphopantothenate--cysteine ligase OS=Homo sapiens GN=PPCS PE=1 SV=2	8	-0.152669	24.9087	WT_GBA - CT	0.0185046	0.0726694	FALSE	no hit	7.09265
RCN2	Q14257|Q14257-2	Reticulocalbin-2 OS=Homo sapiens GN=RCN2 PE=1 SV=1|Isoform 2 of Reticulocalbin-2 OS=Homo sapiens GN=RCN2	12	-0.245172	25.3844	WT_GBA - CT	0.0185762	0.0729042	FALSE	no hit	7.80168
RTN4IP1	Q8WWV3	Reticulon-4-interacting protein 1, mitochondrial OS=Homo sapiens GN=RTN4IP1 PE=1 SV=2	4	0.237405	24.6233	WT_GBA - CT	0.0186508	0.0731504	FALSE	no hit	6.56598
ARHGAP29	F8VWZ8|Q52LW3	Rho GTPase-activating protein 29 OS=Homo sapiens GN=ARHGAP29 PE=1 SV=1|Rho GTPase-activating protein 29 OS=Homo sapiens GN=ARHGAP29 PE=1 SV=2	2	0.216889	21.7275	WT_GBA - CT	0.0187399	0.0734529	FALSE	no hit	5.76536
GOSR1	G5E9T8|O95249	Golgi SNAP receptor complex member 1 (Fragment) OS=Homo sapiens GN=GOSR1 PE=1 SV=2|Golgi SNAP receptor complex member 1 OS=Homo sapiens GN=GOSR1 PE=1 SV=1	12	-0.127264	25.2927	WT_GBA - CT	0.0188353	0.0737795	FALSE	no hit	7.06675
RFC5	P40937	Replication factor C subunit 5 OS=Homo sapiens GN=RFC5 PE=1 SV=1	12	-0.128339	25.4819	WT_GBA - CT	0.0188667	0.0738553	FALSE	no hit	7.33375
MYO18A	A0A0D9SFK2|Q92614|Q92614-4	Unconventional myosin-XVIIIa OS=Homo sapiens GN=MYO18A PE=1 SV=1|Unconventional myosin-XVIIIa OS=Homo sapiens GN=MYO18A PE=1 SV=3|Isoform 4 of Unconventional myosin-XVIIIa OS=Homo sapiens GN=MYO18A	24	-0.14371	26.2229	WT_GBA - CT	0.0191275	0.0748288	FALSE	no hit	6.85029
SGPP1	Q9BX95	Sphingosine-1-phosphate phosphatase 1 OS=Homo sapiens GN=SGPP1 PE=1 SV=2	6	0.158724	24.1931	WT_GBA - CT	0.019145	0.0748497	FALSE	no hit	6.73079
TTPAL	Q5QPC2|Q9BTX7	Alpha-tocopherol transfer protein-like (Fragment) OS=Homo sapiens GN=TTPAL PE=1 SV=1|Alpha-tocopherol transfer protein-like OS=Homo sapiens GN=TTPAL PE=1 SV=2	2	-0.432753	19.8572	WT_GBA - CT	0.0191682	0.0748924	FALSE	no hit	5.48259
STK11	K7EP59|Q15831|Q15831-2	Serine/threonine-protein kinase STK11 OS=Homo sapiens GN=STK11 PE=1 SV=2|Serine/threonine-protein kinase STK11 OS=Homo sapiens GN=STK11 PE=1 SV=1|Isoform 2 of Serine/threonine-protein kinase STK11 OS=Homo sapiens GN=STK11	2	-0.208323	22.7496	WT_GBA - CT	0.0192062	0.0749932	FALSE	no hit	6.22159
C9ORF78	Q9NZ63	Uncharacterized protein C9orf78 OS=Homo sapiens GN=C9orf78 PE=1 SV=1	14	-0.328686	26.0421	WT_GBA - CT	0.0192909	0.0752764	FALSE	no hit	7.28658
ZNF451	E9PH99|Q9Y4E5|Q9Y4E5-2	E3 SUMO-protein ligase ZNF451 OS=Homo sapiens GN=ZNF451 PE=1 SV=1|E3 SUMO-protein ligase ZNF451 OS=Homo sapiens GN=ZNF451 PE=1 SV=2|Isoform 2 of E3 SUMO-protein ligase ZNF451 OS=Homo sapiens GN=ZNF451	5	-0.274513	23.6804	WT_GBA - CT	0.01933	0.0753198	FALSE	no hit	6.36304
SHMT1	P34896|P34896-2	Serine hydroxymethyltransferase, cytosolic OS=Homo sapiens GN=SHMT1 PE=1 SV=1|Isoform 2 of Serine hydroxymethyltransferase, cytosolic OS=Homo sapiens GN=SHMT1	10	-0.170306	25.5188	WT_GBA - CT	0.019332	0.0753198	FALSE	no hit	7.3133
DAGLB	E7ET49|Q8NCG7|Q8NCG7-4	Sn1-specific diacylglycerol lipase beta OS=Homo sapiens GN=DAGLB PE=1 SV=1|Sn1-specific diacylglycerol lipase beta OS=Homo sapiens GN=DAGLB PE=1 SV=2|Isoform 4 of Sn1-specific diacylglycerol lipase beta OS=Homo sapiens GN=DAGLB	3	0.194052	22.1182	WT_GBA - CT	0.0193466	0.0753198	FALSE	no hit	6.16795
DLST	P36957	Dihydrolipoyllysine-residue succinyltransferase component of 2-oxoglutarate dehydrogenase complex, mitochondrial OS=Homo sapiens GN=DLST PE=1 SV=4	12	-0.192448	26.3438	WT_GBA - CT	0.0193511	0.0753198	FALSE	no hit	7.87784
P4HTM	Q9NXG6|Q9NXG6-3	Transmembrane prolyl 4-hydroxylase OS=Homo sapiens GN=P4HTM PE=1 SV=2|Isoform 3 of Transmembrane prolyl 4-hydroxylase OS=Homo sapiens GN=P4HTM	3	-0.362416	21.9739	WT_GBA - CT	0.0194276	0.0755697	FALSE	no hit	6.25897
LMAN2	Q12907	Vesicular integral-membrane protein VIP36 OS=Homo sapiens GN=LMAN2 PE=1 SV=1	6	0.154373	24.5045	WT_GBA - CT	0.0194469	0.0755966	FALSE	no hit	7.55547
PCNT	O95613	Pericentrin OS=Homo sapiens GN=PCNT PE=1 SV=4	45	-0.138083	26.7289	WT_GBA - CT	0.0194594	0.0755975	FALSE	no hit	6.81863
ABCF1	Q5STZ8|Q8NE71	ATP-binding cassette sub-family F member 1 (Fragment) OS=Homo sapiens GN=ABCF1 PE=1 SV=8|ATP-binding cassette sub-family F member 1 OS=Homo sapiens GN=ABCF1 PE=1 SV=2	32	0.156785	27.6204	WT_GBA - CT	0.0195092	0.075728	FALSE	no hit	7.77792
TESC	Q96BS2	Calcineurin B homologous protein 3 OS=Homo sapiens GN=TESC PE=1 SV=3	5	-0.308621	22.9659	WT_GBA - CT	0.0195176	0.075728	FALSE	no hit	6.20806
DHX8	F5H658|Q14562	ATP-dependent RNA helicase DHX8 OS=Homo sapiens GN=DHX8 PE=1 SV=1|ATP-dependent RNA helicase DHX8 OS=Homo sapiens GN=DHX8 PE=1 SV=1	15	0.140382	25.1687	WT_GBA - CT	0.0195676	0.0758737	FALSE	no hit	6.63276
NPLOC4	A0A0D9SFI9|Q8TAT6|Q8TAT6-2	Nuclear protein localization protein 4 homolog OS=Homo sapiens GN=NPLOC4 PE=1 SV=1|Nuclear protein localization protein 4 homolog OS=Homo sapiens GN=NPLOC4 PE=1 SV=3|Isoform 2 of Nuclear protein localization protein 4 homolog OS=Homo sapiens GN=NPLOC4	20	-0.14046	26.569	WT_GBA - CT	0.0195936	0.0758966	FALSE	no hit	7.48204
PEX6	Q13608	Peroxisome assembly factor 2 OS=Homo sapiens GN=PEX6 PE=1 SV=2	4	-0.262386	22.6676	WT_GBA - CT	0.0195982	0.0758966	FALSE	no hit	6.23899
PRKRA	O75569	Interferon-inducible double-stranded RNA-dependent protein kinase activator A OS=Homo sapiens GN=PRKRA PE=1 SV=1	6	-0.195516	24.9258	WT_GBA - CT	0.0196761	0.0761505	FALSE	no hit	6.96751
GTF3C6	Q969F1	General transcription factor 3C polypeptide 6 OS=Homo sapiens GN=GTF3C6 PE=1 SV=1	3	0.178763	23.1581	WT_GBA - CT	0.0197118	0.0762404	FALSE	no hit	5.95844
ANKHD1	D6RHC4|E9PDP5|Q8IWZ3-6	Ankyrin repeat and KH domain-containing protein 1 (Fragment) OS=Homo sapiens GN=ANKHD1 PE=1 SV=1|Ankyrin repeat and KH domain-containing protein 1 (Fragment) OS=Homo sapiens GN=ANKHD1 PE=1 SV=1|Isoform 6 of Ankyrin repeat and KH domain-containing protein 1 OS=Homo sapiens GN=ANKHD1	19	0.137921	25.9265	WT_GBA - CT	0.0197254	0.0762451	FALSE	no hit	7.01606
L3MBTL4	F8W9S8|Q8NA19|Q8NA19-2	Lethal(3)malignant brain tumor-like protein 4 OS=Homo sapiens GN=L3MBTL4 PE=1 SV=1|Lethal(3)malignant brain tumor-like protein 4 OS=Homo sapiens GN=L3MBTL4 PE=1 SV=2|Isoform 2 of Lethal(3)malignant brain tumor-like protein 4 OS=Homo sapiens GN=L3MBTL4	2	-0.278044	22.6778	WT_GBA - CT	0.0197749	0.0763884	FALSE	no hit	5.52855
ARFGAP2	G5E9L0|Q8N6H7	ADP-ribosylation factor GTPase-activating protein 2 OS=Homo sapiens GN=ARFGAP2 PE=1 SV=2|ADP-ribosylation factor GTPase-activating protein 2 OS=Homo sapiens GN=ARFGAP2 PE=1 SV=1	19	0.128853	26.3735	WT_GBA - CT	0.0198161	0.0764992	FALSE	no hit	7.23611
EEF2K	O00418	Eukaryotic elongation factor 2 kinase OS=Homo sapiens GN=EEF2K PE=1 SV=2	8	0.186222	25.1719	WT_GBA - CT	0.0198342	0.0765212	FALSE	no hit	6.59535
RETSAT	Q6NUM9	All-trans-retinol 13,14-reductase OS=Homo sapiens GN=RETSAT PE=1 SV=2	3	0.150903	22.7286	WT_GBA - CT	0.0198661	0.0765962	FALSE	no hit	6.14304
AK1	P00568|Q5T9B7	Adenylate kinase isoenzyme 1 OS=Homo sapiens GN=AK1 PE=1 SV=3|Adenylate kinase isoenzyme 1 OS=Homo sapiens GN=AK1 PE=1 SV=1	14	-0.169382	25.9546	WT_GBA - CT	0.0199332	0.0768067	FALSE	no hit	7.42469
MTHFSD	F5H0M7|Q2M296|Q2M296-2|Q2M296-3|Q2M296-4	Methenyltetrahydrofolate synthase domain-containing protein OS=Homo sapiens GN=MTHFSD PE=1 SV=1|Methenyltetrahydrofolate synthase domain-containing protein OS=Homo sapiens GN=MTHFSD PE=1 SV=2|Isoform 2 of Methenyltetrahydrofolate synthase domain-containing protein OS=Homo sapiens GN=MTHFSD|Isoform 3 of Methenyltetrahydrofolate synthase domain-containing protein OS=Homo sapiens GN=MTHFSD|Isoform 4…	2	-0.231285	22.5048	WT_GBA - CT	0.0199863	0.0769171	FALSE	no hit	6.19675
GIGYF2	Q6Y7W6	PERQ amino acid-rich with GYF domain-containing protein 2 OS=Homo sapiens GN=GIGYF2 PE=1 SV=1	36	0.11373	27.2996	WT_GBA - CT	0.0199869	0.0769171	FALSE	no hit	7.53294
MAT2B	Q9NZL9	Methionine adenosyltransferase 2 subunit beta OS=Homo sapiens GN=MAT2B PE=1 SV=1	14	-0.143449	25.5533	WT_GBA - CT	0.0200368	0.0770607	FALSE	no hit	7.18682
ANKRD40	Q6AI12	Ankyrin repeat domain-containing protein 40 OS=Homo sapiens GN=ANKRD40 PE=1 SV=2	4	0.195307	23.2768	WT_GBA - CT	0.0200595	0.0770997	FALSE	no hit	6.36366
ARHGEF1	Q92888-3	Isoform 3 of Rho guanine nucleotide exchange factor 1 OS=Homo sapiens GN=ARHGEF1	23	0.144382	26.0738	WT_GBA - CT	0.0200748	0.0771104	FALSE	no hit	7.1427
MTOR	P42345	Serine/threonine-protein kinase mTOR OS=Homo sapiens GN=MTOR PE=1 SV=1	29	0.143579	26.3621	WT_GBA - CT	0.0200979	0.0771508	FALSE	no hit	7.03833
MAP4K3	Q8IVH8|Q8IVH8-3	Mitogen-activated protein kinase kinase kinase kinase 3 OS=Homo sapiens GN=MAP4K3 PE=1 SV=1|Isoform 3 of Mitogen-activated protein kinase kinase kinase kinase 3 OS=Homo sapiens GN=MAP4K3	2	-0.249328	22.0253	WT_GBA - CT	0.0201348	0.0772443	FALSE	no hit	6.67645
POLR3F	Q9H1D9	DNA-directed RNA polymerase III subunit RPC6 OS=Homo sapiens GN=POLR3F PE=1 SV=1	7	0.138911	23.8335	WT_GBA - CT	0.0201773	0.0773587	FALSE	no hit	6.85044
SRSF10	O75494|O75494-2	Serine/arginine-rich splicing factor 10 OS=Homo sapiens GN=SRSF10 PE=1 SV=1|Isoform 2 of Serine/arginine-rich splicing factor 10 OS=Homo sapiens GN=SRSF10	8	-0.186856	25.0136	WT_GBA - CT	0.0202589	0.0776232	FALSE	no hit	7.65266
NOTCH1	P46531	Neurogenic locus notch homolog protein 1 OS=Homo sapiens GN=NOTCH1 PE=1 SV=4	3	0.190965	22.6841	WT_GBA - CT	0.0203132	0.0777828	FALSE	no hit	6.06775
TLE1	Q04724|Q5T7A9	Transducin-like enhancer protein 1 OS=Homo sapiens GN=TLE1 PE=1 SV=2|Transducin-like enhancer protein 1 OS=Homo sapiens GN=TLE1 PE=1 SV=2	7	0.128288	24.8535	WT_GBA - CT	0.0204301	0.0781816	FALSE	no hit	6.9586
PAG1	Q9NWQ8	Phosphoprotein associated with glycosphingolipid-enriched microdomains 1 OS=Homo sapiens GN=PAG1 PE=1 SV=2	3	-0.306393	23.0521	WT_GBA - CT	0.020477	0.0783122	FALSE	no hit	5.9528
ARHGEF10	H0YAN8|O15013|O15013-4|O15013-5|O15013-6|O15013-7	Rho guanine nucleotide exchange factor 10 (Fragment) OS=Homo sapiens GN=ARHGEF10 PE=1 SV=1|Rho guanine nucleotide exchange factor 10 OS=Homo sapiens GN=ARHGEF10 PE=1 SV=4|Isoform 4 of Rho guanine nucleotide exchange factor 10 OS=Homo sapiens GN=ARHGEF10|Isoform 5 of Rho guanine nucleotide exchange factor 10 OS=Homo sapiens GN=ARHGEF10|Isoform 2 of Rho guanine nucleotide exchange factor 10 OS=Homo…	2	-0.236073	21.7902	WT_GBA - CT	0.0205199	0.0784249	FALSE	no hit	6.01532
HIP1R	O75146	Huntingtin-interacting protein 1-related protein OS=Homo sapiens GN=HIP1R PE=1 SV=2	17	-0.126152	25.4948	WT_GBA - CT	0.0205319	0.0784249	FALSE	no hit	6.71336
NAP1L4	Q99733|Q99733-2	Nucleosome assembly protein 1-like 4 OS=Homo sapiens GN=NAP1L4 PE=1 SV=1|Isoform 2 of Nucleosome assembly protein 1-like 4 OS=Homo sapiens GN=NAP1L4	13	-0.152182	26.0296	WT_GBA - CT	0.0205782	0.0785526	FALSE	no hit	7.62535
ACBD3	Q9H3P7	Golgi resident protein GCP60 OS=Homo sapiens GN=ACBD3 PE=1 SV=4	16	0.147649	26.2538	WT_GBA - CT	0.0206211	0.0786346	FALSE	no hit	7.38524
CEP55	Q53EZ4	Centrosomal protein of 55 kDa OS=Homo sapiens GN=CEP55 PE=1 SV=3	10	-0.150685	25.4753	WT_GBA - CT	0.0206253	0.0786346	FALSE	no hit	6.93589
KIF1BP	Q96EK5	KIF1-binding protein OS=Homo sapiens GN=KIF1BP PE=1 SV=1	18	-0.213334	26.1206	WT_GBA - CT	0.0206552	0.0787	FALSE	no hit	7.42379
ALDH7A1	P49419-2	Isoform 2 of Alpha-aminoadipic semialdehyde dehydrogenase OS=Homo sapiens GN=ALDH7A1	22	-0.150859	27.4701	WT_GBA - CT	0.0206921	0.0787918	FALSE	no hit	7.69784
SCAF11	F8VXG7|Q99590	Protein SCAF11 OS=Homo sapiens GN=SCAF11 PE=1 SV=1|Protein SCAF11 OS=Homo sapiens GN=SCAF11 PE=1 SV=2	21	-0.138759	26.2448	WT_GBA - CT	0.0207548	0.0789813	FALSE	no hit	6.78254
SNAPC4	Q5SXM2	snRNA-activating protein complex subunit 4 OS=Homo sapiens GN=SNAPC4 PE=1 SV=1	6	0.134226	22.7261	WT_GBA - CT	0.0207771	0.0789953	FALSE	no hit	6.04101
PIK3C3	Q8NEB9	Phosphatidylinositol 3-kinase catalytic subunit type 3 OS=Homo sapiens GN=PIK3C3 PE=1 SV=1	13	-0.154996	25.5564	WT_GBA - CT	0.0207928	0.0789953	FALSE	no hit	6.75879
NUDT21	O43809	Cleavage and polyadenylation specificity factor subunit 5 OS=Homo sapiens GN=NUDT21 PE=1 SV=1	12	-0.152451	25.9589	WT_GBA - CT	0.020797	0.0789953	FALSE	no hit	7.72879
MRPS22	G5E9V5|G5E9W7|P82650	28S ribosomal protein S22, mitochondrial OS=Homo sapiens GN=MRPS22 PE=1 SV=1|28S ribosomal protein S22, mitochondrial OS=Homo sapiens GN=MRPS22 PE=1 SV=1|28S ribosomal protein S22, mitochondrial OS=Homo sapiens GN=MRPS22 PE=1 SV=1	18	0.129488	26.4147	WT_GBA - CT	0.0208099	0.0789954	FALSE	no hit	7.51057
MRPL4	K7ELQ0|K7ES61|Q9BYD3|Q9BYD3-2|X6RAY8	39S ribosomal protein L4, mitochondrial OS=Homo sapiens GN=MRPL4 PE=1 SV=1|39S ribosomal protein L4, mitochondrial (Fragment) OS=Homo sapiens GN=MRPL4 PE=1 SV=1|39S ribosomal protein L4, mitochondrial OS=Homo sapiens GN=MRPL4 PE=1 SV=1|Isoform 2 of 39S ribosomal protein L4, mitochondrial OS=Homo sapiens GN=MRPL4|39S ribosomal protein L4, mitochondrial OS=Homo sapiens GN=MRPL4 PE=1 SV=1	3	0.169974	22.4987	WT_GBA - CT	0.0208885	0.0792445	FALSE	no hit	6.88053
TRAM1	G3XAN4|Q15629|Q15629-2	Translocating chain-associated membrane protein 1 OS=Homo sapiens GN=TRAM1 PE=1 SV=1|Translocating chain-associated membrane protein 1 OS=Homo sapiens GN=TRAM1 PE=1 SV=3|Isoform 2 of Translocating chain-associated membrane protein 1 OS=Homo sapiens GN=TRAM1	3	0.219325	23.0376	WT_GBA - CT	0.0209209	0.0793186	FALSE	no hit	6.69213
ARMT1	Q9H993	Protein-glutamate O-methyltransferase OS=Homo sapiens GN=ARMT1 PE=1 SV=1	6	-0.203852	24.7988	WT_GBA - CT	0.0210037	0.0795833	FALSE	no hit	6.85966
ARL6IP5	O75915	PRA1 family protein 3 OS=Homo sapiens GN=ARL6IP5 PE=1 SV=1	4	0.141579	25.0475	WT_GBA - CT	0.0210313	0.079639	FALSE	no hit	7.17321
LACTB2	Q53H82	Beta-lactamase-like protein 2 OS=Homo sapiens GN=LACTB2 PE=1 SV=2	8	-0.142108	24.9724	WT_GBA - CT	0.021066	0.0796881	FALSE	no hit	7.33498
RPLP1	P05386	60S acidic ribosomal protein P1 OS=Homo sapiens GN=RPLP1 PE=1 SV=1	2	0.433746	21.0063	WT_GBA - CT	0.0210702	0.0796881	FALSE	no hit	5.81864
CMSS1	C9J384|Q9BQ75|Q9BQ75-2	Protein CMSS1 (Fragment) OS=Homo sapiens GN=CMSS1 PE=1 SV=1|Protein CMSS1 OS=Homo sapiens GN=CMSS1 PE=1 SV=2|Isoform 2 of Protein CMSS1 OS=Homo sapiens GN=CMSS1	6	-0.177258	24.6527	WT_GBA - CT	0.0210941	0.0797293	FALSE	no hit	6.71339
LRP8	Q14114|Q14114-4	Low-density lipoprotein receptor-related protein 8 OS=Homo sapiens GN=LRP8 PE=1 SV=4|Isoform 4 of Low-density lipoprotein receptor-related protein 8 OS=Homo sapiens GN=LRP8	3	0.264186	22.1759	WT_GBA - CT	0.0211547	0.0799091	FALSE	no hit	5.76824
OSTF1	Q92882	Osteoclast-stimulating factor 1 OS=Homo sapiens GN=OSTF1 PE=1 SV=2	5	-0.134575	24.0253	WT_GBA - CT	0.0211801	0.0799504	FALSE	no hit	6.89846
GLOD4	F6TLX2|Q9HC38-2	Glyoxalase domain-containing protein 4 OS=Homo sapiens GN=GLOD4 PE=1 SV=1|Isoform 2 of Glyoxalase domain-containing protein 4 OS=Homo sapiens GN=GLOD4	15	-0.119259	26.8162	WT_GBA - CT	0.0211917	0.0799504	FALSE	no hit	7.80779
NT5DC2	Q9H857|Q9H857-2	5'-nucleotidase domain-containing protein 2 OS=Homo sapiens GN=NT5DC2 PE=1 SV=1|Isoform 2 of 5'-nucleotidase domain-containing protein 2 OS=Homo sapiens GN=NT5DC2	8	-0.259891	24.6674	WT_GBA - CT	0.0212884	0.0802662	FALSE	no hit	7.12191
CMTR1	Q8N1G2	Cap-specific mRNA (nucleoside-2'-O-)-methyltransferase 1 OS=Homo sapiens GN=CMTR1 PE=1 SV=1	25	0.128316	26.299	WT_GBA - CT	0.0213942	0.0806154	FALSE	no hit	7.32371
CLNS1A	E9PMI6|J3KN38|P54105	Methylosome subunit pICln OS=Homo sapiens GN=CLNS1A PE=1 SV=1	6	0.18994	25.5043	WT_GBA - CT	0.0214757	0.080873	FALSE	no hit	7.36627
MAST2	Q6P0Q8|Q6P0Q8-2	Microtubule-associated serine/threonine-protein kinase 2 OS=Homo sapiens GN=MAST2 PE=1 SV=2|Isoform 2 of Microtubule-associated serine/threonine-protein kinase 2 OS=Homo sapiens GN=MAST2	4	-0.194381	23.4329	WT_GBA - CT	0.0215562	0.0810371	FALSE	no hit	6.11134
MAOA	P21397	Amine oxidase [flavin-containing] A OS=Homo sapiens GN=MAOA PE=1 SV=1	4	-0.292621	22.9339	WT_GBA - CT	0.0215579	0.0810371	FALSE	no hit	6.28753
NEMF	O60524|O60524-3|O60524-4	Nuclear export mediator factor NEMF OS=Homo sapiens GN=NEMF PE=1 SV=4|Isoform 3 of Nuclear export mediator factor NEMF OS=Homo sapiens GN=NEMF|Isoform 4 of Nuclear export mediator factor NEMF OS=Homo sapiens GN=NEMF	22	0.133067	26.89	WT_GBA - CT	0.0215625	0.0810371	FALSE	no hit	7.18773
MCCC1	Q96RQ3	Methylcrotonoyl-CoA carboxylase subunit alpha, mitochondrial OS=Homo sapiens GN=MCCC1 PE=1 SV=3	7	-0.127743	23.9393	WT_GBA - CT	0.0215721	0.0810371	FALSE	no hit	6.95504
ARHGAP10	A1A4S6	Rho GTPase-activating protein 10 OS=Homo sapiens GN=ARHGAP10 PE=1 SV=1	5	0.149433	24.1421	WT_GBA - CT	0.0216006	0.0810947	FALSE	no hit	6.14251
PDXDC1	Q6P996|Q6P996-4|Q6P996-5	Pyridoxal-dependent decarboxylase domain-containing protein 1 OS=Homo sapiens GN=PDXDC1 PE=1 SV=2|Isoform 4 of Pyridoxal-dependent decarboxylase domain-containing protein 1 OS=Homo sapiens GN=PDXDC1|Isoform 5 of Pyridoxal-dependent decarboxylase domain-containing protein 1 OS=Homo sapiens GN=PDXDC1	16	-0.122201	25.7579	WT_GBA - CT	0.0216221	0.0811259	FALSE	no hit	7.09583
NDUFA6	A0A0C4DGS0|P56556	NADH dehydrogenase [ubiquinone] 1 alpha subcomplex subunit 6 OS=Homo sapiens GN=NDUFA6 PE=1 SV=1|NADH dehydrogenase [ubiquinone] 1 alpha subcomplex subunit 6 OS=Homo sapiens GN=NDUFA6 PE=1 SV=3	3	0.247652	22.7625	WT_GBA - CT	0.0216686	0.0812506	FALSE	no hit	6.38992
ZDHHC13	Q8IUH4	Palmitoyltransferase ZDHHC13 OS=Homo sapiens GN=ZDHHC13 PE=1 SV=3	4	-0.199149	23.2797	WT_GBA - CT	0.0217541	0.0814744	FALSE	no hit	6.08109
PRKAR2B	P31323	cAMP-dependent protein kinase type II-beta regulatory subunit OS=Homo sapiens GN=PRKAR2B PE=1 SV=3	6	0.190943	24.7959	WT_GBA - CT	0.0217548	0.0814744	FALSE	no hit	6.9909
PHYHD1	Q5SRE7|Q5SRE7-2	Phytanoyl-CoA dioxygenase domain-containing protein 1 OS=Homo sapiens GN=PHYHD1 PE=1 SV=2|Isoform 2 of Phytanoyl-CoA dioxygenase domain-containing protein 1 OS=Homo sapiens GN=PHYHD1	6	0.190273	23.8802	WT_GBA - CT	0.0218275	0.0816761	FALSE	no hit	6.28456
TIMM21	Q9BVV7	Mitochondrial import inner membrane translocase subunit Tim21 OS=Homo sapiens GN=TIMM21 PE=1 SV=1	3	0.178411	22.9418	WT_GBA - CT	0.0218457	0.0816761	FALSE	no hit	6.56135
MAPKAPK3	Q16644	MAP kinase-activated protein kinase 3 OS=Homo sapiens GN=MAPKAPK3 PE=1 SV=1	3	0.171688	24.1054	WT_GBA - CT	0.0218501	0.0816761	FALSE	no hit	6.56071
ABCB1	P08183|P08183-2	Multidrug resistance protein 1 OS=Homo sapiens GN=ABCB1 PE=1 SV=3|Isoform 2 of Multidrug resistance protein 1 OS=Homo sapiens GN=ABCB1	9	-0.154397	24.623	WT_GBA - CT	0.0218619	0.0816761	FALSE	no hit	6.71105
ZNF579	Q8NAF0	Zinc finger protein 579 OS=Homo sapiens GN=ZNF579 PE=1 SV=2	8	0.126843	24.3608	WT_GBA - CT	0.021884	0.0817093	FALSE	no hit	6.49784
FARSB	Q9NSD9	Phenylalanine--tRNA ligase beta subunit OS=Homo sapiens GN=FARSB PE=1 SV=3	27	0.127003	27.1088	WT_GBA - CT	0.021899	0.0817155	FALSE	no hit	7.72104
COPS3	Q9UNS2	COP9 signalosome complex subunit 3 OS=Homo sapiens GN=COPS3 PE=1 SV=3	9	0.137756	26.4178	WT_GBA - CT	0.0219221	0.0817519	FALSE	no hit	7.57937
ENAH	Q8N8S7|Q8N8S7-3	Protein enabled homolog OS=Homo sapiens GN=ENAH PE=1 SV=2|Isoform 3 of Protein enabled homolog OS=Homo sapiens GN=ENAH	23	0.118981	27.2232	WT_GBA - CT	0.0219866	0.0819427	FALSE	no hit	7.76408
MIF	P14174	Macrophage migration inhibitory factor OS=Homo sapiens GN=MIF PE=1 SV=4	3	-0.121875	25.2892	WT_GBA - CT	0.0220578	0.0821582	FALSE	no hit	8.44481
PSMD9	F5GX23|F5H5V4|J3KN29|O00233|O00233-2	26S proteasome non-ATPase regulatory subunit 9 OS=Homo sapiens GN=PSMD9 PE=1 SV=1|26S proteasome non-ATPase regulatory subunit 9 (Fragment) OS=Homo sapiens GN=PSMD9 PE=1 SV=1|26S proteasome non-ATPase regulatory subunit 9 OS=Homo sapiens GN=PSMD9 PE=1 SV=1|26S proteasome non-ATPase regulatory subunit 9 OS=Homo sapiens GN=PSMD9 PE=1 SV=3|Isoform p27-S of 26S proteasome non-ATPase regulatory subuni…	10	-0.208962	25.5879	WT_GBA - CT	0.0220753	0.0821735	FALSE	no hit	7.5575
TP53BP2	Q13625|Q13625-3	Apoptosis-stimulating of p53 protein 2 OS=Homo sapiens GN=TP53BP2 PE=1 SV=2|Isoform 3 of Apoptosis-stimulating of p53 protein 2 OS=Homo sapiens GN=TP53BP2	22	0.142924	26.3655	WT_GBA - CT	0.0221178	0.082282	FALSE	no hit	6.88919
FTL	P02792	Ferritin light chain OS=Homo sapiens GN=FTL PE=1 SV=2	5	-0.3725	24.4584	WT_GBA - CT	0.0222177	0.0826035	FALSE	no hit	6.925
NAB1	B8ZZS2|Q13506|Q13506-2	NGFI-A binding protein 1 (EGR1 binding protein 1), isoform CRA_b OS=Homo sapiens GN=NAB1 PE=1 SV=1|NGFI-A-binding protein 1 OS=Homo sapiens GN=NAB1 PE=1 SV=2|Isoform Short of NGFI-A-binding protein 1 OS=Homo sapiens GN=NAB1	3	0.13913	22.7796	WT_GBA - CT	0.0222368	0.0826246	FALSE	no hit	6.19347
ADCK3	Q8NI60|Q8NI60-3	Atypical kinase ADCK3, mitochondrial OS=Homo sapiens GN=ADCK3 PE=1 SV=1|Isoform 3 of Atypical kinase ADCK3, mitochondrial OS=Homo sapiens GN=ADCK3	6	-0.233884	25.2098	WT_GBA - CT	0.0222533	0.082636	FALSE	no hit	6.95412
IPO9	Q96P70	Importin-9 OS=Homo sapiens GN=IPO9 PE=1 SV=3	15	-0.217243	25.5568	WT_GBA - CT	0.0223384	0.0828251	FALSE	no hit	7.19023
BRAF	P15056	Serine/threonine-protein kinase B-raf OS=Homo sapiens GN=BRAF PE=1 SV=4	5	0.120083	23.4833	WT_GBA - CT	0.0223426	0.0828251	FALSE	no hit	6.52416
FER|PE1FE10	P16591|P16591-2|P16591-3|W0S4B9	Tyrosine-protein kinase Fer OS=Homo sapiens GN=FER PE=1 SV=2|Isoform 2 of Tyrosine-protein kinase Fer OS=Homo sapiens GN=FER|Isoform 3 of Tyrosine-protein kinase Fer OS=Homo sapiens GN=FER|Tyrosine-protein kinase OS=Homo sapiens GN=Pe1Fe10 PE=1 SV=1	2	-0.199754	23.438	WT_GBA - CT	0.0223447	0.0828251	FALSE	no hit	6.24523
GAPVD1	Q14C86|Q14C86-2|Q14C86-5|Q14C86-6	GTPase-activating protein and VPS9 domain-containing protein 1 OS=Homo sapiens GN=GAPVD1 PE=1 SV=2|Isoform 2 of GTPase-activating protein and VPS9 domain-containing protein 1 OS=Homo sapiens GN=GAPVD1|Isoform 5 of GTPase-activating protein and VPS9 domain-containing protein 1 OS=Homo sapiens GN=GAPVD1|Isoform 6 of GTPase-activating protein and VPS9 domain-containing protein 1 OS=Homo sapiens GN=G…	30	-0.126193	26.8168	WT_GBA - CT	0.0223597	0.0828307	FALSE	no hit	7.1921
GNL3	Q9BVP2|Q9BVP2-2	Guanine nucleotide-binding protein-like 3 OS=Homo sapiens GN=GNL3 PE=1 SV=2|Isoform 2 of Guanine nucleotide-binding protein-like 3 OS=Homo sapiens GN=GNL3	14	-0.224975	26.3861	WT_GBA - CT	0.022397	0.0829189	FALSE	no hit	7.42854
NEFL	P07196	Neurofilament light polypeptide OS=Homo sapiens GN=NEFL PE=1 SV=3	9	0.67378	24.5874	WT_GBA - CT	0.0224287	0.0829861	FALSE	candidate	6.64928
BRAP	J3KNN7|Q7Z569	BRCA1-associated protein OS=Homo sapiens GN=BRAP PE=1 SV=1|BRCA1-associated protein OS=Homo sapiens GN=BRAP PE=1 SV=2	9	0.16062	24.894	WT_GBA - CT	0.0224811	0.0830187	FALSE	no hit	6.73151
GTPBP10	A4D1E9	GTP-binding protein 10 OS=Homo sapiens GN=GTPBP10 PE=1 SV=1	5	0.141458	23.4831	WT_GBA - CT	0.0224859	0.0830187	FALSE	no hit	6.38711
AIMP1	Q12904	Aminoacyl tRNA synthase complex-interacting multifunctional protein 1 OS=Homo sapiens GN=AIMP1 PE=1 SV=2	21	0.131584	26.9648	WT_GBA - CT	0.0224871	0.0830187	FALSE	no hit	7.77332
GATB	D6REA0|O75879	Glutamyl-tRNA(Gln) amidotransferase subunit B, mitochondrial OS=Homo sapiens GN=GATB PE=1 SV=1|Glutamyl-tRNA(Gln) amidotransferase subunit B, mitochondrial OS=Homo sapiens GN=GATB PE=1 SV=1	9	0.13747	25.2471	WT_GBA - CT	0.0224916	0.0830187	FALSE	no hit	6.92077
PRKAA2	A0A087WXX9|P54646	5'-AMP-activated protein kinase catalytic subunit alpha-2 OS=Homo sapiens GN=PRKAA2 PE=1 SV=1|5'-AMP-activated protein kinase catalytic subunit alpha-2 OS=Homo sapiens GN=PRKAA2 PE=1 SV=2	3	0.221115	22.9582	WT_GBA - CT	0.0225171	0.083063	FALSE	no hit	6.47114
RAB2A	P61019	Ras-related protein Rab-2A OS=Homo sapiens GN=RAB2A PE=1 SV=1	5	-0.113598	25.0682	WT_GBA - CT	0.0226016	0.0833248	FALSE	no hit	7.43985
RNPS1	H3BMM9|H3BTC0|Q15287|Q15287-2|Q15287-3	RNA-binding protein with serine-rich domain 1 (Fragment) OS=Homo sapiens GN=RNPS1 PE=1 SV=1|RNA-binding protein with serine-rich domain 1 (Fragment) OS=Homo sapiens GN=RNPS1 PE=1 SV=1|RNA-binding protein with serine-rich domain 1 OS=Homo sapiens GN=RNPS1 PE=1 SV=1|Isoform 2 of RNA-binding protein with serine-rich domain 1 OS=Homo sapiens GN=RNPS1|Isoform 3 of RNA-binding protein with serine-rich …	6	-0.196218	24.8388	WT_GBA - CT	0.0226425	0.0834254	FALSE	no hit	7.23114
ASAP1	A0A0A0MRE5|Q9ULH1|Q9ULH1-2	Arf-GAP with SH3 domain, ANK repeat and PH domain-containing protein 1 OS=Homo sapiens GN=ASAP1 PE=1 SV=1|Arf-GAP with SH3 domain, ANK repeat and PH domain-containing protein 1 OS=Homo sapiens GN=ASAP1 PE=1 SV=4|Isoform 1 of Arf-GAP with SH3 domain, ANK repeat and PH domain-containing protein 1 OS=Homo sapiens GN=ASAP1	5	-0.176742	23.1138	WT_GBA - CT	0.0226709	0.08348	FALSE	no hit	6.02779
UQCRC1	P31930	Cytochrome b-c1 complex subunit 1, mitochondrial OS=Homo sapiens GN=UQCRC1 PE=1 SV=3	14	-0.189505	25.5914	WT_GBA - CT	0.0227233	0.0836227	FALSE	no hit	7.32857
SECISBP2	Q96T21|Q96T21-2|Q96T21-3	Selenocysteine insertion sequence-binding protein 2 OS=Homo sapiens GN=SECISBP2 PE=1 SV=2|Isoform 2 of Selenocysteine insertion sequence-binding protein 2 OS=Homo sapiens GN=SECISBP2|Isoform 3 of Selenocysteine insertion sequence-binding protein 2 OS=Homo sapiens GN=SECISBP2	4	0.204214	22.626	WT_GBA - CT	0.022816	0.0839139	FALSE	no hit	5.93012
SORBS3	O60504|O60504-2	Vinexin OS=Homo sapiens GN=SORBS3 PE=1 SV=2|Isoform Beta of Vinexin OS=Homo sapiens GN=SORBS3	8	-0.155384	24.5766	WT_GBA - CT	0.0228448	0.083935	FALSE	no hit	6.75023
KIF13A	Q9H1H9|Q9H1H9-2|Q9H1H9-3|Q9H1H9-4	Kinesin-like protein KIF13A OS=Homo sapiens GN=KIF13A PE=1 SV=2|Isoform 2 of Kinesin-like protein KIF13A OS=Homo sapiens GN=KIF13A|Isoform 3 of Kinesin-like protein KIF13A OS=Homo sapiens GN=KIF13A|Isoform 4 of Kinesin-like protein KIF13A OS=Homo sapiens GN=KIF13A	2	0.205149	21.694	WT_GBA - CT	0.0228539	0.083935	FALSE	no hit	5.71509
ADAMTS1	Q9UHI8	A disintegrin and metalloproteinase with thrombospondin motifs 1 OS=Homo sapiens GN=ADAMTS1 PE=1 SV=4	5	0.209585	23.4246	WT_GBA - CT	0.0228628	0.083935	FALSE	no hit	6.46577
DBI	P07108	Acyl-CoA-binding protein OS=Homo sapiens GN=DBI PE=1 SV=2	4	-0.483796	24.6546	WT_GBA - CT	0.0229624	0.0841603	FALSE	no hit	7.315
TMEM9	Q9P0T7	Transmembrane protein 9 OS=Homo sapiens GN=TMEM9 PE=1 SV=1	2	0.156875	23.4744	WT_GBA - CT	0.0229649	0.0841603	FALSE	no hit	7.14084
GTPBP3	Q969Y2|Q969Y2-2|Q969Y2-3|Q969Y2-4	tRNA modification GTPase GTPBP3, mitochondrial OS=Homo sapiens GN=GTPBP3 PE=1 SV=2|Isoform 2 of tRNA modification GTPase GTPBP3, mitochondrial OS=Homo sapiens GN=GTPBP3|Isoform 3 of tRNA modification GTPase GTPBP3, mitochondrial OS=Homo sapiens GN=GTPBP3|Isoform 4 of tRNA modification GTPase GTPBP3, mitochondrial OS=Homo sapiens GN=GTPBP3	11	0.162684	24.8057	WT_GBA - CT	0.0229653	0.0841603	FALSE	no hit	6.9823
TCEB3	A0A024RAC6	Transcription elongation factor B (SIII), polypeptide 3 (110kDa, elongin A), isoform CRA_a OS=Homo sapiens GN=TCEB3 PE=1 SV=1	19	-0.145957	26.1628	WT_GBA - CT	0.0229811	0.084168	FALSE	no hit	7.29803
GMPR2	A0A087WWM4|F8WAN9|H0YMB3|Q9P2T1|Q9P2T1-3	GMP reductase OS=Homo sapiens GN=GMPR2 PE=1 SV=1|GMP reductase OS=Homo sapiens GN=GMPR2 PE=1 SV=1|GMP reductase OS=Homo sapiens GN=GMPR2 PE=1 SV=1|GMP reductase 2 OS=Homo sapiens GN=GMPR2 PE=1 SV=1|Isoform 3 of GMP reductase 2 OS=Homo sapiens GN=GMPR2	4	-0.17759	23.9197	WT_GBA - CT	0.0230116	0.0842295	FALSE	no hit	6.72709
SPAG1	Q07617	Sperm-associated antigen 1 OS=Homo sapiens GN=SPAG1 PE=1 SV=3	4	-0.14782	23.2545	WT_GBA - CT	0.02317	0.0847513	FALSE	no hit	6.12739
MP68	P56378	6.8 kDa mitochondrial proteolipid OS=Homo sapiens GN=MP68 PE=1 SV=1	2	0.181045	23.0325	WT_GBA - CT	0.0231817	0.0847513	FALSE	no hit	6.34902
ATPIF1	Q9UII2	ATPase inhibitor, mitochondrial OS=Homo sapiens GN=ATPIF1 PE=1 SV=1	9	-0.323377	26.2279	WT_GBA - CT	0.0232273	0.0848674	FALSE	no hit	8.33206
RPS6KB1	P23443	Ribosomal protein S6 kinase beta-1 OS=Homo sapiens GN=RPS6KB1 PE=1 SV=2	8	-0.135543	24.4203	WT_GBA - CT	0.0233146	0.0850874	FALSE	no hit	6.94524
SELO	A0A087X0Q9|Q9BVL4	Selenoprotein O OS=Homo sapiens GN=SELO PE=1 SV=1|Selenoprotein O OS=Homo sapiens GN=SELO PE=2 SV=3	5	0.117963	24.3613	WT_GBA - CT	0.0233152	0.0850874	FALSE	no hit	6.84647
RPUSD4	Q96CM3	RNA pseudouridylate synthase domain-containing protein 4 OS=Homo sapiens GN=RPUSD4 PE=1 SV=1	2	0.166816	22.549	WT_GBA - CT	0.023358	0.0851929	FALSE	no hit	6.43158
COQ9	H3BNT2|O75208	Ubiquinone biosynthesis protein COQ9, mitochondrial (Fragment) OS=Homo sapiens GN=COQ9 PE=1 SV=7|Ubiquinone biosynthesis protein COQ9, mitochondrial OS=Homo sapiens GN=COQ9 PE=1 SV=1	4	-0.282671	24.2667	WT_GBA - CT	0.0233931	0.0852273	FALSE	no hit	6.70155
VDAC1	P21796	Voltage-dependent anion-selective channel protein 1 OS=Homo sapiens GN=VDAC1 PE=1 SV=2	14	-0.453013	26.4359	WT_GBA - CT	0.0233952	0.0852273	FALSE	no hit	7.59593
CHSY1	Q86X52	Chondroitin sulfate synthase 1 OS=Homo sapiens GN=CHSY1 PE=1 SV=3	2	-0.183052	22.8809	WT_GBA - CT	0.0234959	0.0855435	FALSE	no hit	5.94596
SPATS2	Q86XZ4	Spermatogenesis-associated serine-rich protein 2 OS=Homo sapiens GN=SPATS2 PE=1 SV=1	14	-0.145187	25.4338	WT_GBA - CT	0.0235388	0.0856489	FALSE	no hit	6.75285
STX5	Q13190	Syntaxin-5 OS=Homo sapiens GN=STX5 PE=1 SV=2	8	0.151797	24.6175	WT_GBA - CT	0.0236624	0.0860477	FALSE	no hit	6.83109
GLTSCR2	Q9NZM5	Glioma tumor suppressor candidate region gene 2 protein OS=Homo sapiens GN=GLTSCR2 PE=1 SV=2	7	0.238294	24.8738	WT_GBA - CT	0.0237023	0.086103	FALSE	no hit	7.10182
IGHMBP2	P38935	DNA-binding protein SMUBP-2 OS=Homo sapiens GN=IGHMBP2 PE=1 SV=3	9	-0.157919	24.3776	WT_GBA - CT	0.0237057	0.086103	FALSE	no hit	6.54969
DIS3L	Q8TF46	DIS3-like exonuclease 1 OS=Homo sapiens GN=DIS3L PE=1 SV=2	4	0.16655	22.8311	WT_GBA - CT	0.0237602	0.0862197	FALSE	no hit	6.21587
TTC39C	Q8N584|Q8N584-2	Tetratricopeptide repeat protein 39C OS=Homo sapiens GN=TTC39C PE=2 SV=2|Isoform 2 of Tetratricopeptide repeat protein 39C OS=Homo sapiens GN=TTC39C	2	0.158684	22.581	WT_GBA - CT	0.0237659	0.0862197	FALSE	no hit	6.56022
ERLIN1	O75477	Erlin-1 OS=Homo sapiens GN=ERLIN1 PE=1 SV=1	5	-0.405103	23.8891	WT_GBA - CT	0.0237959	0.0862776	FALSE	no hit	6.75991
ATL2	Q8NHH9|Q8NHH9-3|Q8NHH9-5	Atlastin-2 OS=Homo sapiens GN=ATL2 PE=1 SV=2|Isoform 3 of Atlastin-2 OS=Homo sapiens GN=ATL2|Isoform 5 of Atlastin-2 OS=Homo sapiens GN=ATL2	9	0.174422	24.9571	WT_GBA - CT	0.0238435	0.0863992	FALSE	no hit	7.16385
SEC61B	P60468	Protein transport protein Sec61 subunit beta OS=Homo sapiens GN=SEC61B PE=1 SV=2	4	0.210682	25.7954	WT_GBA - CT	0.0238866	0.0864698	FALSE	no hit	7.68041
DHCR7	Q9UBM7	7-dehydrocholesterol reductase OS=Homo sapiens GN=DHCR7 PE=1 SV=1	5	0.173867	24.4734	WT_GBA - CT	0.0238911	0.0864698	FALSE	no hit	7.55052
CWC25	Q9NXE8	Pre-mRNA-splicing factor CWC25 homolog OS=Homo sapiens GN=CWC25 PE=1 SV=1	5	0.175352	23.475	WT_GBA - CT	0.0239446	0.0864997	FALSE	no hit	6.40446
GPCPD1	Q9NPB8	Glycerophosphocholine phosphodiesterase GPCPD1 OS=Homo sapiens GN=GPCPD1 PE=1 SV=2	6	-0.155686	24.2345	WT_GBA - CT	0.0239508	0.0864997	FALSE	no hit	6.52018
MOCS3	O95396	Adenylyltransferase and sulfurtransferase MOCS3 OS=Homo sapiens GN=MOCS3 PE=1 SV=1	13	0.13311	25.5841	WT_GBA - CT	0.0239523	0.0864997	FALSE	no hit	7.16907
INPPL1	O15357	Phosphatidylinositol 3,4,5-trisphosphate 5-phosphatase 2 OS=Homo sapiens GN=INPPL1 PE=1 SV=2	17	-0.14012	25.5	WT_GBA - CT	0.0239557	0.0864997	FALSE	no hit	6.81758
CNP	P09543|P09543-2	2',3'-cyclic-nucleotide 3'-phosphodiesterase OS=Homo sapiens GN=CNP PE=1 SV=2|Isoform CNPI of 2',3'-cyclic-nucleotide 3'-phosphodiesterase OS=Homo sapiens GN=CNP	19	-0.149406	26.1389	WT_GBA - CT	0.0239971	0.0865983	FALSE	no hit	7.62914
RNASET2|H0YAE9	A0A087WZM2|D6REQ6|D6RHI9|H0YAE9|O00584	Ribonuclease T2 OS=Homo sapiens GN=RNASET2 PE=1 SV=1|Ribonuclease T2 OS=Homo sapiens GN=RNASET2 PE=1 SV=1|Ribonuclease T2 (Fragment) OS=Homo sapiens GN=RNASET2 PE=1 SV=7|Uncharacterized protein (Fragment) OS=Homo sapiens PE=3 SV=1|Ribonuclease T2 OS=Homo sapiens GN=RNASET2 PE=1 SV=2	2	-0.293038	23.0684	WT_GBA - CT	0.0240758	0.0868313	FALSE	no hit	6.78024
SSU72	Q9NP77	RNA polymerase II subunit A C-terminal domain phosphatase SSU72 OS=Homo sapiens GN=SSU72 PE=1 SV=1	6	0.207618	23.9249	WT_GBA - CT	0.0241282	0.0869692	FALSE	no hit	6.9655
CAPN15	O75808	Calpain-15 OS=Homo sapiens GN=CAPN15 PE=1 SV=1	3	-0.161418	22.0949	WT_GBA - CT	0.0241829	0.0870601	FALSE	no hit	5.92423
EIF3D	O15371|O15371-2|O15371-3	Eukaryotic translation initiation factor 3 subunit D OS=Homo sapiens GN=EIF3D PE=1 SV=1|Isoform 2 of Eukaryotic translation initiation factor 3 subunit D OS=Homo sapiens GN=EIF3D|Isoform 3 of Eukaryotic translation initiation factor 3 subunit D OS=Homo sapiens GN=EIF3D	19	0.154216	26.5166	WT_GBA - CT	0.0241844	0.0870601	FALSE	no hit	7.82641
METTL9|PAP1	H3BN86|Q8TD49|Q9H1A3|Q9H1A3-2	Methyltransferase-like protein 9 (Fragment) OS=Homo sapiens GN=METTL9 PE=1 SV=1|Methyltransferase-like protein 9 OS=Homo sapiens GN=PAP1 PE=1 SV=1|Methyltransferase-like protein 9 OS=Homo sapiens GN=METTL9 PE=2 SV=1|Isoform 2 of Methyltransferase-like protein 9 OS=Homo sapiens GN=METTL9	2	0.174793	22.6217	WT_GBA - CT	0.024196	0.0870601	FALSE	no hit	6.1679
USP16	Q9Y5T5|Q9Y5T5-2	Ubiquitin carboxyl-terminal hydrolase 16 OS=Homo sapiens GN=USP16 PE=1 SV=1|Isoform 2 of Ubiquitin carboxyl-terminal hydrolase 16 OS=Homo sapiens GN=USP16	10	0.146475	25.251	WT_GBA - CT	0.0242545	0.0872036	FALSE	no hit	6.87114
KPNA4	O00629	Importin subunit alpha-3 OS=Homo sapiens GN=KPNA4 PE=1 SV=1	5	0.144569	24.4893	WT_GBA - CT	0.0242642	0.0872036	FALSE	no hit	7.48662
MCM5	P33992	DNA replication licensing factor MCM5 OS=Homo sapiens GN=MCM5 PE=1 SV=5	35	0.246102	27.3211	WT_GBA - CT	0.0243293	0.0873863	FALSE	no hit	7.82801
LIG4	P49917	DNA ligase 4 OS=Homo sapiens GN=LIG4 PE=1 SV=2	2	-0.25395	22.9275	WT_GBA - CT	0.0244287	0.0876919	FALSE	no hit	6.33486
TBC1D25	Q3MII6	TBC1 domain family member 25 OS=Homo sapiens GN=TBC1D25 PE=1 SV=2	5	0.170427	23.0713	WT_GBA - CT	0.0245197	0.0879672	FALSE	no hit	6.12687
NARFL	Q9H6Q4	Cytosolic Fe-S cluster assembly factor NARFL OS=Homo sapiens GN=NARFL PE=1 SV=1	4	0.171103	23.0167	WT_GBA - CT	0.0245776	0.0880968	FALSE	no hit	6.15504
SP1	P08047	Transcription factor Sp1 OS=Homo sapiens GN=SP1 PE=1 SV=3	8	0.196189	25.1357	WT_GBA - CT	0.0245845	0.0880968	FALSE	no hit	6.7495
TMEM230	Q96A57|Q96A57-2	Transmembrane protein 230 OS=Homo sapiens GN=TMEM230 PE=1 SV=1|Isoform 1 of Transmembrane protein 230 OS=Homo sapiens GN=TMEM230	2	0.182892	24.0662	WT_GBA - CT	0.0246781	0.0883807	FALSE	no hit	6.91472
TSEN15	Q8WW01	tRNA-splicing endonuclease subunit Sen15 OS=Homo sapiens GN=TSEN15 PE=1 SV=1	3	0.266386	21.5443	WT_GBA - CT	0.0248832	0.0890634	FALSE	no hit	6.02801
SCFD2	Q8WU76|Q8WU76-2	Sec1 family domain-containing protein 2 OS=Homo sapiens GN=SCFD2 PE=1 SV=2|Isoform 2 of Sec1 family domain-containing protein 2 OS=Homo sapiens GN=SCFD2	3	0.185664	23.7009	WT_GBA - CT	0.0249657	0.0893065	FALSE	no hit	6.25827
CLN5	A0A024R644|O75503	Ceroid-lipofuscinosis neuronal protein 5 OS=Homo sapiens GN=CLN5 PE=1 SV=1|Ceroid-lipofuscinosis neuronal protein 5 OS=Homo sapiens GN=CLN5 PE=1 SV=2	4	0.281188	22.4228	WT_GBA - CT	0.0249859	0.0893267	FALSE	no hit	6.34232
PUS1	G8JLB3|Q9Y606|Q9Y606-2	tRNA pseudouridine synthase (Fragment) OS=Homo sapiens GN=PUS1 PE=1 SV=1|tRNA pseudouridine synthase A, mitochondrial OS=Homo sapiens GN=PUS1 PE=1 SV=3|Isoform 2 of tRNA pseudouridine synthase A, mitochondrial OS=Homo sapiens GN=PUS1	14	-0.125163	25.5174	WT_GBA - CT	0.0250032	0.0893366	FALSE	no hit	7.26891
DCTN1	E7EX90|Q14203|Q14203-3|Q14203-4|Q14203-6	Dynactin subunit 1 OS=Homo sapiens GN=DCTN1 PE=1 SV=1|Dynactin subunit 1 OS=Homo sapiens GN=DCTN1 PE=1 SV=3|Isoform 3 of Dynactin subunit 1 OS=Homo sapiens GN=DCTN1|Isoform 4 of Dynactin subunit 1 OS=Homo sapiens GN=DCTN1|Isoform 6 of Dynactin subunit 1 OS=Homo sapiens GN=DCTN1	44	-0.106955	27.4637	WT_GBA - CT	0.0250837	0.0895721	FALSE	no hit	7.67385
GNG2	G3V2N0	Guanine nucleotide-binding protein subunit gamma OS=Homo sapiens GN=GNG2 PE=1 SV=1	2	0.170266	23.5931	WT_GBA - CT	0.0251706	0.0898303	FALSE	no hit	5.89221
CHST10	O43529	Carbohydrate sulfotransferase 10 OS=Homo sapiens GN=CHST10 PE=1 SV=1	2	-0.199047	21.5378	WT_GBA - CT	0.025215	0.0899364	FALSE	no hit	6.16478
TLE4	Q04727-3	Isoform 3 of Transducin-like enhancer protein 4 OS=Homo sapiens GN=TLE4	2	0.219167	23.5169	WT_GBA - CT	0.025261	0.0900104	FALSE	no hit	6.60858
PYCR2	A0A087WTV6|Q96C36	Pyrroline-5-carboxylate reductase 2 OS=Homo sapiens GN=PYCR2 PE=1 SV=1|Pyrroline-5-carboxylate reductase 2 OS=Homo sapiens GN=PYCR2 PE=1 SV=1	8	-0.170171	25.3332	WT_GBA - CT	0.0252651	0.0900104	FALSE	no hit	7.52534
PSTPIP2	Q9H939	Proline-serine-threonine phosphatase-interacting protein 2 OS=Homo sapiens GN=PSTPIP2 PE=1 SV=4	5	-0.122228	24.3235	WT_GBA - CT	0.0252833	0.0900231	FALSE	no hit	6.85919
CSRP2	F8VW96|Q16527	Cysteine and glycine-rich protein 2 OS=Homo sapiens GN=CSRP2 PE=1 SV=1|Cysteine and glycine-rich protein 2 OS=Homo sapiens GN=CSRP2 PE=1 SV=3	9	0.170017	25.8918	WT_GBA - CT	0.0253152	0.0900846	FALSE	no hit	7.67142
RAB3GAP2	Q9H2M9	Rab3 GTPase-activating protein non-catalytic subunit OS=Homo sapiens GN=RAB3GAP2 PE=1 SV=1	24	-0.124851	26.3676	WT_GBA - CT	0.025578	0.0909594	FALSE	no hit	7.20849
PNN	Q9H307	Pinin OS=Homo sapiens GN=PNN PE=1 SV=4	20	-0.221181	26.4395	WT_GBA - CT	0.0255953	0.0909594	FALSE	no hit	7.45867
PGRMC1	O00264	Membrane-associated progesterone receptor component 1 OS=Homo sapiens GN=PGRMC1 PE=1 SV=3	12	-0.178134	25.5015	WT_GBA - CT	0.0256055	0.0909594	FALSE	no hit	7.26886
MPP5	Q8N3R9	MAGUK p55 subfamily member 5 OS=Homo sapiens GN=MPP5 PE=1 SV=3	13	0.140024	25.2682	WT_GBA - CT	0.0257141	0.0912925	FALSE	no hit	6.73689
VMP1	Q96GC9	Vacuole membrane protein 1 OS=Homo sapiens GN=VMP1 PE=1 SV=1	2	0.363365	23.0575	WT_GBA - CT	0.0257624	0.0914112	FALSE	no hit	6.68101
NOL9	Q5SY16	Polynucleotide 5'-hydroxyl-kinase NOL9 OS=Homo sapiens GN=NOL9 PE=1 SV=1	8	0.153578	24.2139	WT_GBA - CT	0.0257843	0.0914361	FALSE	no hit	6.88795
GNPDA1	P46926	Glucosamine-6-phosphate isomerase 1 OS=Homo sapiens GN=GNPDA1 PE=1 SV=1	6	0.177222	25.105	WT_GBA - CT	0.025862	0.0916585	FALSE	no hit	7.23232
GSS	P48637	Glutathione synthetase OS=Homo sapiens GN=GSS PE=1 SV=1	20	-0.119317	26.6162	WT_GBA - CT	0.0258872	0.0916949	FALSE	no hit	7.54799
FECH	P22830|P22830-2	Ferrochelatase, mitochondrial OS=Homo sapiens GN=FECH PE=1 SV=2|Isoform 2 of Ferrochelatase, mitochondrial OS=Homo sapiens GN=FECH	15	-0.154961	25.8071	WT_GBA - CT	0.0259412	0.0918297	FALSE	no hit	7.13397
PRKAR1A	P10644	cAMP-dependent protein kinase type I-alpha regulatory subunit OS=Homo sapiens GN=PRKAR1A PE=1 SV=1	15	-0.226412	25.3867	WT_GBA - CT	0.0259594	0.0918297	FALSE	no hit	7.48831
OGFR	Q9NZT2|Q9NZT2-2	Opioid growth factor receptor OS=Homo sapiens GN=OGFR PE=1 SV=3|Isoform 2 of Opioid growth factor receptor OS=Homo sapiens GN=OGFR	15	-0.123152	25.1803	WT_GBA - CT	0.0259701	0.0918297	FALSE	no hit	7.29742
RAD1	O60671|O60671-2	Cell cycle checkpoint protein RAD1 OS=Homo sapiens GN=RAD1 PE=1 SV=1|Isoform 2 of Cell cycle checkpoint protein RAD1 OS=Homo sapiens GN=RAD1	3	0.209948	23.5111	WT_GBA - CT	0.0261533	0.0923471	FALSE	no hit	6.72398
FBXO9	Q9UK97|Q9UK97-2|Q9UK97-3	F-box only protein 9 OS=Homo sapiens GN=FBXO9 PE=1 SV=1|Isoform 2 of F-box only protein 9 OS=Homo sapiens GN=FBXO9|Isoform 3 of F-box only protein 9 OS=Homo sapiens GN=FBXO9	2	0.282467	20.6985	WT_GBA - CT	0.0261533	0.0923471	FALSE	no hit	5.57302
TCEAL1	Q15170-2	Isoform 2 of Transcription elongation factor A protein-like 1 OS=Homo sapiens GN=TCEAL1	5	-0.25698	24.6997	WT_GBA - CT	0.0261615	0.0923471	FALSE	no hit	6.98206
DHRS7	Q9Y394|Q9Y394-2	Dehydrogenase/reductase SDR family member 7 OS=Homo sapiens GN=DHRS7 PE=1 SV=1|Isoform 2 of Dehydrogenase/reductase SDR family member 7 OS=Homo sapiens GN=DHRS7	5	0.168708	24.6958	WT_GBA - CT	0.0262499	0.0926058	FALSE	no hit	7.09675
CYB5R1	Q9UHQ9	NADH-cytochrome b5 reductase 1 OS=Homo sapiens GN=CYB5R1 PE=1 SV=1	8	0.280503	25.1561	WT_GBA - CT	0.026282	0.0926659	FALSE	no hit	7.05424
THOC5	Q13769	THO complex subunit 5 homolog OS=Homo sapiens GN=THOC5 PE=1 SV=2	15	0.114495	25.9897	WT_GBA - CT	0.0263201	0.0927042	FALSE	no hit	7.00354
ZBTB33	Q86T24	Transcriptional regulator Kaiso OS=Homo sapiens GN=ZBTB33 PE=1 SV=2	6	0.154456	24.178	WT_GBA - CT	0.026323	0.0927042	FALSE	no hit	6.79003
H2AFV	Q71UI9|Q71UI9-2	Histone H2A.V OS=Homo sapiens GN=H2AFV PE=1 SV=3|Isoform 2 of Histone H2A.V OS=Homo sapiens GN=H2AFV	2	-0.239929	22.9007	WT_GBA - CT	0.0263551	0.092764	FALSE	no hit	7.08055
DLG5	Q8TDM6|Q8TDM6-4	Disks large homolog 5 OS=Homo sapiens GN=DLG5 PE=1 SV=4|Isoform 4 of Disks large homolog 5 OS=Homo sapiens GN=DLG5	3	-0.196916	22.4331	WT_GBA - CT	0.0263899	0.0928333	FALSE	no hit	5.84438
MRPL14	Q6P1L8	39S ribosomal protein L14, mitochondrial OS=Homo sapiens GN=MRPL14 PE=1 SV=1	2	0.133446	24.5992	WT_GBA - CT	0.0264802	0.0930975	FALSE	no hit	6.69002
MRPL11	Q9Y3B7	39S ribosomal protein L11, mitochondrial OS=Homo sapiens GN=MRPL11 PE=1 SV=1	10	0.136457	25.2952	WT_GBA - CT	0.0265512	0.0932544	FALSE	no hit	7.34966
NCLN	K7EMW4|Q969V3|Q969V3-2	Isoform 2 of Nicalin OS=Homo sapiens GN=NCLN|Nicalin OS=Homo sapiens GN=NCLN PE=1 SV=1|Nicalin OS=Homo sapiens GN=NCLN PE=1 SV=2	15	0.131789	25.7616	WT_GBA - CT	0.0265552	0.0932544	FALSE	no hit	7.36385
EFNB1	P98172	Ephrin-B1 OS=Homo sapiens GN=EFNB1 PE=1 SV=1	4	-0.152949	23.6375	WT_GBA - CT	0.026611	0.0933729	FALSE	no hit	6.451
PTGFRN	Q9P2B2	Prostaglandin F2 receptor negative regulator OS=Homo sapiens GN=PTGFRN PE=1 SV=2	15	-0.189974	25.7754	WT_GBA - CT	0.0266193	0.0933729	FALSE	no hit	7.09123
SNX9	A0A087WYU1|Q9Y5X1	Sorting nexin OS=Homo sapiens GN=SNX9 PE=1 SV=1|Sorting nexin-9 OS=Homo sapiens GN=SNX9 PE=1 SV=1	14	-0.115507	26.0531	WT_GBA - CT	0.0266395	0.0933903	FALSE	no hit	6.93987
IFT46	E9PR06|E9PRT0|E9PSB9|Q9NQC8|Q9NQC8-2	Intraflagellar transport protein 46 homolog OS=Homo sapiens GN=IFT46 PE=1 SV=1|Intraflagellar transport protein 46 homolog (Fragment) OS=Homo sapiens GN=IFT46 PE=1 SV=7|Intraflagellar transport protein 46 homolog (Fragment) OS=Homo sapiens GN=IFT46 PE=1 SV=1|Intraflagellar transport protein 46 homolog OS=Homo sapiens GN=IFT46 PE=1 SV=1|Isoform 2 of Intraflagellar transport protein 46 homolog OS=H…	2	-0.172555	23.1231	WT_GBA - CT	0.0266579	0.0934015	FALSE	no hit	6.5284
MPP1	Q00013	55 kDa erythrocyte membrane protein OS=Homo sapiens GN=MPP1 PE=1 SV=2	7	-0.132607	24.5818	WT_GBA - CT	0.0267294	0.093508	FALSE	no hit	6.86941
EPHA7	Q15375	Ephrin type-A receptor 7 OS=Homo sapiens GN=EPHA7 PE=1 SV=3	7	0.124436	24.058	WT_GBA - CT	0.0267479	0.093508	FALSE	no hit	6.22371
LRRC40	Q9H9A6	Leucine-rich repeat-containing protein 40 OS=Homo sapiens GN=LRRC40 PE=1 SV=1	19	0.108481	26.1502	WT_GBA - CT	0.026753	0.093508	FALSE	no hit	7.52237
BMP2K	Q9NSY1|Q9NSY1-2|Q9NSY1-3	BMP-2-inducible protein kinase OS=Homo sapiens GN=BMP2K PE=1 SV=2|Isoform 2 of BMP-2-inducible protein kinase OS=Homo sapiens GN=BMP2K|Isoform 3 of BMP-2-inducible protein kinase OS=Homo sapiens GN=BMP2K	2	-0.17891	22.529	WT_GBA - CT	0.0267654	0.093508	FALSE	no hit	6.17827
HAUS4	Q9H6D7	HAUS augmin-like complex subunit 4 OS=Homo sapiens GN=HAUS4 PE=1 SV=1	10	-0.165273	25.0781	WT_GBA - CT	0.0267769	0.093508	FALSE	no hit	6.75526
RAF1	P04049	RAF proto-oncogene serine/threonine-protein kinase OS=Homo sapiens GN=RAF1 PE=1 SV=1	7	-0.11444	24.6738	WT_GBA - CT	0.0267986	0.093508	FALSE	no hit	6.91342
GSTP1	P09211	Glutathione S-transferase P OS=Homo sapiens GN=GSTP1 PE=1 SV=2	8	0.169696	25.3241	WT_GBA - CT	0.0268187	0.093508	FALSE	no hit	7.00678
CDKN2AIPNL	Q96HQ2	CDKN2AIP N-terminal-like protein OS=Homo sapiens GN=CDKN2AIPNL PE=1 SV=1	7	-0.320914	24.1893	WT_GBA - CT	0.0268206	0.093508	FALSE	no hit	7.10543
MRPL21	Q7Z2W9	39S ribosomal protein L21, mitochondrial OS=Homo sapiens GN=MRPL21 PE=1 SV=2	6	0.174753	24.3457	WT_GBA - CT	0.0268329	0.093508	FALSE	no hit	6.8552
TOR3A	Q9H497|Q9H497-2	Torsin-3A OS=Homo sapiens GN=TOR3A PE=1 SV=1|Isoform 2 of Torsin-3A OS=Homo sapiens GN=TOR3A	2	-0.244181	22.6947	WT_GBA - CT	0.0268405	0.093508	FALSE	no hit	6.3731
PBXIP1	Q96AQ6|Q96AQ6-2	Pre-B-cell leukemia transcription factor-interacting protein 1 OS=Homo sapiens GN=PBXIP1 PE=1 SV=1|Isoform 2 of Pre-B-cell leukemia transcription factor-interacting protein 1 OS=Homo sapiens GN=PBXIP1	7	-0.163976	24.1752	WT_GBA - CT	0.0270012	0.0939757	FALSE	no hit	6.26981
BCAR1	P56945|P56945-2|P56945-3|P56945-5|P56945-6|P56945-7|P56945-8	Breast cancer anti-estrogen resistance protein 1 OS=Homo sapiens GN=BCAR1 PE=1 SV=2|Isoform 2 of Breast cancer anti-estrogen resistance protein 1 OS=Homo sapiens GN=BCAR1|Isoform 3 of Breast cancer anti-estrogen resistance protein 1 OS=Homo sapiens GN=BCAR1|Isoform 5 of Breast cancer anti-estrogen resistance protein 1 OS=Homo sapiens GN=BCAR1|Isoform 6 of Breast cancer anti-estrogen resistance pr…	5	0.190213	23.344	WT_GBA - CT	0.0270199	0.0939757	FALSE	no hit	6.37387
CBR1	P16152	Carbonyl reductase [NADPH] 1 OS=Homo sapiens GN=CBR1 PE=1 SV=3	10	-0.167518	25.6632	WT_GBA - CT	0.027021	0.0939757	FALSE	no hit	7.2598
COX4I1	P13073	Cytochrome c oxidase subunit 4 isoform 1, mitochondrial OS=Homo sapiens GN=COX4I1 PE=1 SV=1	7	-0.184756	26.0764	WT_GBA - CT	0.027041	0.0939757	FALSE	no hit	7.88307
MDC1	Q14676	Mediator of DNA damage checkpoint protein 1 OS=Homo sapiens GN=MDC1 PE=1 SV=3	39	0.291169	26.5515	WT_GBA - CT	0.0270513	0.0939757	FALSE	no hit	7.39275
UQCRH	P07919	Cytochrome b-c1 complex subunit 6, mitochondrial OS=Homo sapiens GN=UQCRH PE=1 SV=2	5	-0.215766	24.6262	WT_GBA - CT	0.0270992	0.0940888	FALSE	no hit	7.17413
MAP2K4	P45985|P45985-2	Dual specificity mitogen-activated protein kinase kinase 4 OS=Homo sapiens GN=MAP2K4 PE=1 SV=1|Isoform 2 of Dual specificity mitogen-activated protein kinase kinase 4 OS=Homo sapiens GN=MAP2K4	7	-0.135015	24.6403	WT_GBA - CT	0.0271379	0.0941701	FALSE	no hit	7.22454
DNAJB6	A0A0J9YX62|O75190|O75190-2|O75190-3	DnaJ homolog subfamily B member 6 OS=Homo sapiens GN=DNAJB6 PE=1 SV=1|DnaJ homolog subfamily B member 6 OS=Homo sapiens GN=DNAJB6 PE=1 SV=2|Isoform B of DnaJ homolog subfamily B member 6 OS=Homo sapiens GN=DNAJB6|Isoform C of DnaJ homolog subfamily B member 6 OS=Homo sapiens GN=DNAJB6	8	0.312745	24.6565	WT_GBA - CT	0.0271619	0.0942001	FALSE	no hit	6.94648
PHF12	Q96QT6	PHD finger protein 12 OS=Homo sapiens GN=PHF12 PE=1 SV=2	3	-0.136253	22.5257	WT_GBA - CT	0.027209	0.0943102	FALSE	no hit	5.95802
ERC1	Q8IUD2	ELKS/Rab6-interacting/CAST family member 1 OS=Homo sapiens GN=ERC1 PE=1 SV=1	23	-0.146379	26.1509	WT_GBA - CT	0.0272844	0.0945181	FALSE	no hit	6.71246
QPRT	Q15274	Nicotinate-nucleotide pyrophosphorylase [carboxylating] OS=Homo sapiens GN=QPRT PE=1 SV=3	6	0.253231	24.3552	WT_GBA - CT	0.0273559	0.0946984	FALSE	no hit	7.09371
PGM2	Q96G03	Phosphoglucomutase-2 OS=Homo sapiens GN=PGM2 PE=1 SV=4	22	-0.142047	26.9116	WT_GBA - CT	0.0273673	0.0946984	FALSE	no hit	7.49668
ILKAP	Q9H0C8	Integrin-linked kinase-associated serine/threonine phosphatase 2C OS=Homo sapiens GN=ILKAP PE=1 SV=1	13	0.172854	25.6822	WT_GBA - CT	0.0273829	0.094699	FALSE	no hit	7.4887
STX6	O43752	Syntaxin-6 OS=Homo sapiens GN=STX6 PE=1 SV=1	5	-0.155874	23.9999	WT_GBA - CT	0.0274262	0.0947954	FALSE	no hit	6.66856
RDH14	Q9HBH5	Retinol dehydrogenase 14 OS=Homo sapiens GN=RDH14 PE=1 SV=1	8	0.155037	24.4005	WT_GBA - CT	0.0274963	0.0949844	FALSE	no hit	6.904
MRPS26	Q9BYN8	28S ribosomal protein S26, mitochondrial OS=Homo sapiens GN=MRPS26 PE=1 SV=1	12	0.119316	25.5735	WT_GBA - CT	0.0275574	0.095142	FALSE	no hit	7.57245
PI4KA	J3KN10|P42356	Phosphatidylinositol 4-kinase alpha OS=Homo sapiens GN=PI4KA PE=1 SV=1|Phosphatidylinositol 4-kinase alpha OS=Homo sapiens GN=PI4KA PE=1 SV=4	14	0.131112	25.6963	WT_GBA - CT	0.0276301	0.0952845	FALSE	no hit	6.68765
TMED8	Q6PL24	Protein TMED8 OS=Homo sapiens GN=TMED8 PE=1 SV=1	4	-0.196183	23.4684	WT_GBA - CT	0.0276391	0.0952845	FALSE	no hit	6.55435
YTHDC2	Q9H6S0	Probable ATP-dependent RNA helicase YTHDC2 OS=Homo sapiens GN=YTHDC2 PE=1 SV=2	26	-0.20846	26.5171	WT_GBA - CT	0.0276452	0.0952845	FALSE	no hit	7.31907
ATAD3A	H0Y2W2|Q9NVI7|Q9NVI7-2|Q9NVI7-3	ATPase family AAA domain-containing protein 3A (Fragment) OS=Homo sapiens GN=ATAD3A PE=1 SV=1|ATPase family AAA domain-containing protein 3A OS=Homo sapiens GN=ATAD3A PE=1 SV=2|Isoform 2 of ATPase family AAA domain-containing protein 3A OS=Homo sapiens GN=ATAD3A|Isoform 3 of ATPase family AAA domain-containing protein 3A OS=Homo sapiens GN=ATAD3A	10	0.435125	25.1435	WT_GBA - CT	0.027858	0.095964	FALSE	no hit	7.43351
ARL15	A0A087WUW9|Q9NXU5	ADP-ribosylation factor-like protein 15 OS=Homo sapiens GN=ARL15 PE=1 SV=1|ADP-ribosylation factor-like protein 15 OS=Homo sapiens GN=ARL15 PE=1 SV=1	3	-0.198005	23.0718	WT_GBA - CT	0.0278981	0.0960484	FALSE	no hit	6.36289
CWC22	Q9HCG8	Pre-mRNA-splicing factor CWC22 homolog OS=Homo sapiens GN=CWC22 PE=1 SV=3	16	-0.123168	25.7735	WT_GBA - CT	0.0279381	0.0961321	FALSE	no hit	6.93643
TMEM214	Q6NUQ4|Q6NUQ4-2	Transmembrane protein 214 OS=Homo sapiens GN=TMEM214 PE=1 SV=2|Isoform 2 of Transmembrane protein 214 OS=Homo sapiens GN=TMEM214	11	0.150092	25.8627	WT_GBA - CT	0.0279559	0.0961396	FALSE	no hit	7.14776
GPC4	O75487	Glypican-4 OS=Homo sapiens GN=GPC4 PE=1 SV=4	2	-0.404545	21.7796	WT_GBA - CT	0.0279821	0.0961757	FALSE	no hit	5.89224
NCAPG2	Q86XI2|Q86XI2-2	Condensin-2 complex subunit G2 OS=Homo sapiens GN=NCAPG2 PE=1 SV=1|Isoform 2 of Condensin-2 complex subunit G2 OS=Homo sapiens GN=NCAPG2	6	0.123435	23.9677	WT_GBA - CT	0.0280254	0.0962708	FALSE	no hit	6.53953
VTI1A	Q96AJ9|Q96AJ9-1	Vesicle transport through interaction with t-SNAREs homolog 1A OS=Homo sapiens GN=VTI1A PE=1 SV=2|Isoform 1 of Vesicle transport through interaction with t-SNAREs homolog 1A OS=Homo sapiens GN=VTI1A	6	-0.253627	24.0272	WT_GBA - CT	0.0280688	0.0963659	FALSE	no hit	6.94763
EDC3	Q96F86	Enhancer of mRNA-decapping protein 3 OS=Homo sapiens GN=EDC3 PE=1 SV=1	16	0.142208	25.8432	WT_GBA - CT	0.0281583	0.0966191	FALSE	no hit	7.41236
SMC3	Q9UQE7	Structural maintenance of chromosomes protein 3 OS=Homo sapiens GN=SMC3 PE=1 SV=2	70	-0.142845	28.6402	WT_GBA - CT	0.0282235	0.0967017	FALSE	no hit	7.77041
CD9	A6NNI4|G8JLH6|P21926	Tetraspanin OS=Homo sapiens GN=CD9 PE=1 SV=1|Tetraspanin (Fragment) OS=Homo sapiens GN=CD9 PE=1 SV=1|CD9 antigen OS=Homo sapiens GN=CD9 PE=1 SV=4	3	-0.164386	24.0285	WT_GBA - CT	0.0282247	0.0967017	FALSE	no hit	6.59487
HCCS	P53701	Cytochrome c-type heme lyase OS=Homo sapiens GN=HCCS PE=1 SV=1	7	-0.132368	25.0946	WT_GBA - CT	0.0282313	0.0967017	FALSE	no hit	6.98755
NSMCE2	E5RFJ1|Q96MF7	E3 SUMO-protein ligase NSE2 OS=Homo sapiens GN=NSMCE2 PE=1 SV=1|E3 SUMO-protein ligase NSE2 OS=Homo sapiens GN=NSMCE2 PE=1 SV=2	6	-0.121799	24.415	WT_GBA - CT	0.0282453	0.0967017	FALSE	no hit	6.69336
PPT1	P50897	Palmitoyl-protein thioesterase 1 OS=Homo sapiens GN=PPT1 PE=1 SV=1	5	0.190706	25.0062	WT_GBA - CT	0.0282935	0.0968126	FALSE	no hit	7.36388
PAFAH1B3	Q15102	Platelet-activating factor acetylhydrolase IB subunit gamma OS=Homo sapiens GN=PAFAH1B3 PE=1 SV=1	7	-0.127963	25.1223	WT_GBA - CT	0.0283132	0.096826	FALSE	no hit	7.78625
PHACTR2	J3KP75	Phosphatase and actin regulator OS=Homo sapiens GN=PHACTR2 PE=1 SV=1	4	-0.18937	23.5192	WT_GBA - CT	0.0283807	0.0970029	FALSE	no hit	6.11176
FAM76B	F5GX09|Q5HYJ3	Protein FAM76B OS=Homo sapiens GN=FAM76B PE=1 SV=1|Protein FAM76B OS=Homo sapiens GN=FAM76B PE=1 SV=3	3	0.190199	23.1266	WT_GBA - CT	0.0284077	0.0970411	FALSE	no hit	6.11948
COA3	Q9Y2R0	Cytochrome c oxidase assembly factor 3 homolog, mitochondrial OS=Homo sapiens GN=COA3 PE=1 SV=1	6	0.160822	24.7993	WT_GBA - CT	0.0284342	0.0970564	FALSE	no hit	7.41593
MYH10	P35580|P35580-3	Myosin-10 OS=Homo sapiens GN=MYH10 PE=1 SV=3|Isoform 3 of Myosin-10 OS=Homo sapiens GN=MYH10	112	-0.131948	29.2664	WT_GBA - CT	0.0284438	0.0970564	FALSE	no hit	8.17689
PTS	E9PNN3|Q03393	6-pyruvoyl tetrahydrobiopterin synthase OS=Homo sapiens GN=PTS PE=1 SV=1	2	-0.280062	22.7743	WT_GBA - CT	0.0286021	0.0975098	FALSE	no hit	5.96632
POLE	Q07864	DNA polymerase epsilon catalytic subunit A OS=Homo sapiens GN=POLE PE=1 SV=5	27	0.164151	26.2304	WT_GBA - CT	0.0286322	0.0975098	FALSE	no hit	7.22456
ECHDC1	Q9NTX5|Q9NTX5-2|Q9NTX5-6	Ethylmalonyl-CoA decarboxylase OS=Homo sapiens GN=ECHDC1 PE=1 SV=2|Isoform 2 of Ethylmalonyl-CoA decarboxylase OS=Homo sapiens GN=ECHDC1|Isoform 6 of Ethylmalonyl-CoA decarboxylase OS=Homo sapiens GN=ECHDC1	11	-0.126124	25.1035	WT_GBA - CT	0.028644	0.0975098	FALSE	no hit	7.04092
AP1G2	O75843	AP-1 complex subunit gamma-like 2 OS=Homo sapiens GN=AP1G2 PE=1 SV=1	3	-0.283078	21.6301	WT_GBA - CT	0.0286545	0.0975098	FALSE	no hit	5.94667
MAP7D3	Q8IWC1|Q8IWC1-2	MAP7 domain-containing protein 3 OS=Homo sapiens GN=MAP7D3 PE=1 SV=2|Isoform 2 of MAP7 domain-containing protein 3 OS=Homo sapiens GN=MAP7D3	15	0.188232	25.9824	WT_GBA - CT	0.028656	0.0975098	FALSE	no hit	6.79951
ARFGEF3	Q5TH69	Brefeldin A-inhibited guanine nucleotide-exchange protein 3 OS=Homo sapiens GN=ARFGEF3 PE=1 SV=3	4	0.137847	22.4128	WT_GBA - CT	0.0286885	0.0975663	FALSE	no hit	5.68264
MSL1	J3KSZ8|Q68DK7	Male-specific lethal 1 homolog OS=Homo sapiens GN=MSL1 PE=1 SV=1|Male-specific lethal 1 homolog OS=Homo sapiens GN=MSL1 PE=1 SV=3	4	0.166395	23.5352	WT_GBA - CT	0.0288336	0.0979976	FALSE	no hit	6.45287
MRPL53	Q96EL3	39S ribosomal protein L53, mitochondrial OS=Homo sapiens GN=MRPL53 PE=1 SV=1	5	0.116549	24.7349	WT_GBA - CT	0.0288472	0.0979976	FALSE	no hit	7.21859
NUBPL	Q8TB37	Iron-sulfur protein NUBPL OS=Homo sapiens GN=NUBPL PE=1 SV=3	4	0.108425	23.6667	WT_GBA - CT	0.0289294	0.0982225	FALSE	no hit	6.44895
PTPRK	E9PGC5|Q15262|Q15262-2|Q15262-3|Q15262-4|Q5TG12	Receptor-type tyrosine-protein phosphatase kappa OS=Homo sapiens GN=PTPRK PE=1 SV=1|Receptor-type tyrosine-protein phosphatase kappa OS=Homo sapiens GN=PTPRK PE=1 SV=2|Isoform 2 of Receptor-type tyrosine-protein phosphatase kappa OS=Homo sapiens GN=PTPRK|Isoform 3 of Receptor-type tyrosine-protein phosphatase kappa OS=Homo sapiens GN=PTPRK|Isoform 4 of Receptor-type tyrosine-protein phosphatase k…	5	-0.199281	23.2594	WT_GBA - CT	0.0289836	0.0983388	FALSE	no hit	6.19115
PIK3C2A	O00443	Phosphatidylinositol 4-phosphate 3-kinase C2 domain-containing subunit alpha OS=Homo sapiens GN=PIK3C2A PE=1 SV=2	16	-0.124446	25.2626	WT_GBA - CT	0.0289957	0.0983388	FALSE	no hit	6.48455
[truncated: 16,615 more rows]
