# Supplementary material for: Glucocerebrosidase is imported into mitochondria and preserves complex I integrity and energy metabolism
Source: Nat Commun. 2023 Apr 6;14:1930. doi: 10.1038/s41467-023-37454-4 (PMC10079970; doi:10.1038/s41467-023-37454-4)
Supplement: Supplementary file 6 — Supplementary Data 3 [file 41467_2023_37454_MOESM6_ESM.xlsx]

## Sheet: Supplementary Dataset 3
DEG_Top100_midbrain organoids DIV 42_integrated
Identity	cluster_id	gene	GC_E326K_p_val	GC_E326K_avg_log2FC	GC_E326K_pct,1	GC_E326K_pct,2	GC_E326K_p_val_adj	MUT_E326K_p_val	MUT_E326K_avg_log2FC	MUT_E326K_pct,1	MUT_E326K_pct,2	MUT_E326K_p_val_adj	MUT_L444P-1_p_val	MUT_L444P-1_avg_log2FC	MUT_L444P-1_pct,1	MUT_L444P-1_pct,2	MUT_L444P-1_p_val_adj	MUT_L444P-2_p_val	MUT_L444P-2_avg_log2FC	MUT_L444P-2_pct,1	MUT_L444P-2_pct,2	MUT_L444P-2_p_val_adj	GC_L444P-2_p_val	GC_L444P-2_avg_log2FC	GC_L444P-2_pct,1	GC_L444P-2_pct,2	GC_L444P-2_p_val_adj	GC_L444P-1_p_val	GC_L444P-1_avg_log2FC	GC_L444P-1_pct,1	GC_L444P-1_pct,2	GC_L444P-1_p_val_adj	max_pval	minimump_p_val
Radial Glia	0	TPBG	3.15e-157	2.3996	0.719	0.09	7.52e-153	1.29e-151	1.80099	0.711	0.166	3.07e-147	6.28e-212	1.10491	0.972	0.548	1.5e-207	0	2.02181	0.88	0.288	0	3.14e-278	1.8576	0.871	0.318	7.49e-274	1.54e-240	1.09626	0.959	0.545	3.69e-236	1.29e-151	0
Radial Glia	0	GLIS3	6.86e-115	0.87108	0.366	0.027	1.64e-110	2.04e-101	0.505997	0.252	0.024	4.87e-97	4.06e-268	0.895496	0.81	0.27	9.69e-264	8.32e-305	0.578171	0.368	0.027	1.99e-300	4.8e-215	0.515011	0.335	0.036	1.15e-210	0	1.03948	0.801	0.254	0	2.04e-101	0
Radial Glia	0	NFIA	1.35e-92	0.74089	0.333	0.028	3.22e-88	1.17e-28	0.492485	0.256	0.077	2.79e-24	8.37e-256	1.08732	0.955	0.473	2e-251	0	1.33015	0.699	0.118	0	4.6e-301	1.04523	0.539	0.076	1.1e-296	1.52e-286	1.01103	0.938	0.477	3.64e-282	1.17e-28	0
Radial Glia	0	RSPO1	1.16e-80	0.600082	0.288	0.023	2.77e-76	5.12e-67	0.560141	0.292	0.051	1.22e-62	8e-238	0.749084	0.52	0.106	1.91e-233	0	1.07696	0.593	0.09	0	1.51e-201	0.984814	0.586	0.145	3.59e-197	7.11e-273	0.741512	0.53	0.128	1.7e-268	5.12e-67	0
Radial Glia	0	RSPO3	2.39e-70	0.655401	0.242	0.019	5.7e-66	1.05e-122	1.0486	0.279	0.024	2.5e-118	0	1.90393	0.748	0.138	0	0	2.22339	0.647	0.044	0	0	1.45622	0.572	0.057	0	0	2.06834	0.762	0.133	0	2.39e-70	0
Radial Glia	0	KRT8	3.19e-59	0.327397	0.209	0.017	7.61e-55	1.43e-50	0.33712	0.186	0.027	3.42e-46	2.92e-288	0.887126	0.65	0.15	6.96e-284	3.15e-157	0.589985	0.236	0.024	7.51e-153	1.52e-101	0.559928	0.238	0.04	3.64e-97	0	0.930803	0.634	0.141	0	1.43e-50	0
Radial Glia	0	WLS	4.67e-56	1.84881	0.81	0.327	1.11e-51	3.4e-77	1.47358	0.804	0.439	8.13e-73	0	1.50205	0.993	0.625	0	1.47e-290	1.90051	0.941	0.482	3.5e-286	5.24e-281	1.76728	0.91	0.416	1.25e-276	0	1.72028	0.997	0.638	0	4.67e-56	0
Radial Glia	0	RBP4	5.32e-49	0.634619	0.222	0.024	1.27e-44	4.44e-52	0.768446	0.183	0.026	1.06e-47	0	1.85464	0.942	0.342	0	2.04e-114	0.815062	0.261	0.044	4.88e-110	3.28e-59	0.678318	0.297	0.098	7.83e-55	0	1.74123	0.909	0.313	0	5.32e-49	0
Radial Glia	0	COL4A6	1.23e-43	0.490034	0.281	0.042	2.93e-39	1.17e-40	0.503447	0.299	0.079	2.8e-36	3.81e-215	0.499265	0.491	0.101	9.09e-211	1.52e-306	1.41643	0.751	0.186	3.63e-302	0	1.53124	0.785	0.186	0	0	0.573832	0.487	0.087	0	1.17e-40	0
Radial Glia	0	CBLN1	8.21e-33	0.785001	0.19	0.026	1.96e-28	2.6e-63	0.730142	0.213	0.029	6.2e-59	1.87e-192	1.15014	0.644	0.225	4.47e-188	5.79e-141	0.785757	0.298	0.048	1.38e-136	1.05e-135	1.01327	0.334	0.064	2.51e-131	0	1.26768	0.699	0.208	0	8.21e-33	0
Radial Glia	0	IFITM2	4.49e-32	1.65672	0.536	0.196	1.07e-27	5.94e-50	0.991495	0.502	0.18	1.42e-45	5.31e-298	1.18318	0.742	0.215	1.27e-293	3.6e-116	1.04449	0.755	0.381	8.59e-112	4.36e-82	0.878933	0.801	0.514	1.04e-77	0	1.16768	0.712	0.194	0	4.49e-32	0
Radial Glia	0	CNTNAP2	4.55e-25	0.956851	0.536	0.215	1.09e-20	2.08e-108	1.84279	0.847	0.346	4.96e-104	7.23e-301	1.379	0.868	0.339	1.73e-296	9.22e-253	1.74922	0.871	0.35	2.2e-248	3.62e-250	1.8107	0.865	0.371	8.64e-246	0	1.507	0.907	0.32	0	4.55e-25	0
Radial Glia	0	CCDC80	9.83e-22	0.723744	0.32	0.092	2.35e-17	4.36e-14	0.275032	0.233	0.098	1.04e-09	0	1.20029	0.921	0.379	0	2.45e-201	1.15745	0.635	0.181	5.85e-197	1.48e-111	0.741617	0.596	0.232	3.54e-107	0	1.38657	0.893	0.375	0	4.36e-14	0
Radial Glia	0	COL4A5	2.74e-20	0.311139	0.373	0.12	6.54e-16	6.1e-32	0.494787	0.375	0.136	1.46e-27	5.87e-228	0.568133	0.609	0.159	1.4e-223	3.11e-198	0.94795	0.684	0.219	7.44e-194	9.31e-211	1.12037	0.771	0.27	2.22e-206	0	0.627065	0.576	0.127	0	2.74e-20	0
Radial Glia	0	LYPD1	2.82e-19	1.30233	0.399	0.154	6.74e-15	1.05e-48	1.84297	0.439	0.153	2.51e-44	0	1.77874	0.986	0.572	0	8.68e-204	1.50694	0.58	0.145	2.07e-199	9.99e-207	1.47846	0.584	0.144	2.38e-202	0	1.80894	0.98	0.594	0	2.82e-19	0
Radial Glia	0	EFNB3	1.03e-14	0.384499	0.353	0.139	2.47e-10	5.31e-11	0.279463	0.279	0.143	1.27e-06	9.21e-280	1.14274	0.884	0.399	2.2e-275	5.35e-108	0.862643	0.57	0.238	1.28e-103	4.75e-55	0.63421	0.554	0.3	1.13e-50	0	1.35427	0.884	0.34	0	5.31e-11	0
Radial Glia	0	PLTP	2.06e-14	0.488308	0.451	0.213	4.92e-10	1.24e-13	0.327677	0.332	0.174	2.96e-09	0	1.45423	0.987	0.539	0	1.55e-123	0.955134	0.731	0.379	3.7e-119	1.58e-94	0.818448	0.766	0.475	3.78e-90	0	1.40506	0.967	0.511	0	1.24e-13	0
Radial Glia	0	MSX1	2.24e-13	0.415953	0.222	0.07	5.34e-09	8.71e-14	0.372788	0.236	0.105	2.08e-09	1.19e-278	1.50023	0.918	0.434	2.85e-274	1.02e-21	0.601015	0.255	0.134	2.43e-17	1.19e-08	0.295092	0.223	0.149	0.000283651	0	1.52597	0.945	0.475	0	1.19e-08	0
Radial Glia	0	NLRP1	8.92e-12	0.804663	0.765	0.573	2.13e-07	7.27e-08	0.468898	0.638	0.533	0.00173443	6.06e-226	1.1221	0.989	0.824	1.45e-221	6.06e-101	1.23111	0.887	0.714	1.45e-96	6.75e-27	0.672115	0.866	0.771	1.61e-22	0	1.37103	0.995	0.848	0	7.27e-08	0
Radial Glia	0	FSTL1	1.23e-11	0.515617	0.556	0.318	2.94e-07	4.8e-13	0.343026	0.472	0.291	1.15e-08	0	1.24514	0.92	0.375	0	3.81e-169	1.2067	0.766	0.344	9.09e-165	4.51e-62	0.591762	0.615	0.34	1.08e-57	0	1.27137	0.879	0.337	0	1.23e-11	0
Radial Glia	0	FJX1	2.3e-09	0.369149	0.418	0.221	5.49e-05	4.67e-10	0.292027	0.339	0.196	1.11e-05	3.97e-247	1.40711	0.901	0.524	9.47e-243	3.63e-75	1.01016	0.671	0.411	8.66e-71	7.02e-78	0.956164	0.668	0.393	1.68e-73	0	1.48625	0.905	0.462	0	2.3e-09	0
Radial Glia	0	APLP2	8.86e-08	0.600519	0.765	0.581	0.002114	1.24e-19	0.858299	0.714	0.543	2.96e-15	0	1.51602	0.985	0.74	0	2.68e-60	1.10487	0.797	0.645	6.4e-56	2.83e-85	1.08978	0.825	0.621	6.75e-81	0	1.80273	0.989	0.666	0	8.86e-08	0
Radial Glia	0	SPARC	4.18e-34	1.06689	0.85	0.477	9.98e-30	3.2e-64	1.11438	0.837	0.47	7.65e-60	2.2e-284	1.18542	0.991	0.561	5.24e-280	8.89e-200	1.22216	0.944	0.568	2.12e-195	7.46e-178	1.12224	0.95	0.658	1.78e-173	1.21e-296	1.01688	0.979	0.565	2.88e-292	4.18e-34	7.24e-296
Radial Glia	0	MDK	1.07e-18	0.944173	0.843	0.636	2.56e-14	6.98e-18	0.576178	0.837	0.671	1.67e-13	3.67e-260	1.08366	0.999	0.93	8.76e-256	1.78e-120	0.994139	0.985	0.876	4.24e-116	1.75e-118	0.777046	0.992	0.951	4.18e-114	2.58e-295	0.956233	1	0.943	6.15e-291	6.98e-18	1.55e-294
Radial Glia	0	BAMBI	9.77e-44	0.844468	0.281	0.043	2.33e-39	1.32e-38	0.427494	0.179	0.032	3.14e-34	1.05e-288	0.663892	0.578	0.106	2.52e-284	1.74e-247	0.822584	0.375	0.04	4.15e-243	3.75e-190	0.580028	0.263	0.023	8.95e-186	9.85e-289	0.656517	0.433	0.075	2.35e-284	1.32e-38	5.91e-288
Radial Glia	0	SRP14	6e-09	0.420429	0.941	0.889	0.000143313	1.07e-22	0.574092	0.947	0.861	2.54e-18	8.52e-226	0.809065	0.999	0.981	2.03e-221	9.91e-139	0.841031	0.996	0.981	2.37e-134	8.87e-100	0.548054	0.988	0.98	2.12e-95	6.11e-277	0.785257	0.999	0.977	1.46e-272	6e-09	3.66e-276
Radial Glia	0	ANXA2	4.75e-28	1.10509	0.523	0.199	1.13e-23	1.25e-19	0.525849	0.488	0.268	2.99e-15	4.43e-274	1.17827	0.967	0.498	1.06e-269	8.62e-122	0.638866	0.625	0.227	2.06e-117	2.21e-70	0.728512	0.645	0.345	5.28e-66	2.84e-276	0.981263	0.974	0.566	6.79e-272	1.25e-19	1.71e-275
Radial Glia	0	CAST	2.99e-28	0.72204	0.582	0.23	7.13e-24	2.24e-25	0.504018	0.485	0.24	5.34e-21	3.42e-222	0.726781	0.816	0.334	8.16e-218	1.97e-113	0.812052	0.728	0.369	4.69e-109	2.74e-67	0.570413	0.672	0.387	6.55e-63	1.59e-272	0.841902	0.817	0.346	3.81e-268	2.24e-25	9.56e-272
Radial Glia	0	ZFP36L1	3.51e-28	0.956653	0.869	0.554	8.37e-24	4.38e-31	0.827642	0.814	0.557	1.05e-26	8.7e-240	1.07892	0.997	0.582	2.08e-235	4.85e-94	0.825364	0.918	0.649	1.16e-89	2.29e-69	0.672682	0.941	0.74	5.46e-65	2.95e-266	1.01542	0.982	0.578	7.03e-262	3.51e-28	1.77e-265
Radial Glia	0	ITM2B	9.41e-08	0.449573	0.837	0.709	0.0022468	4.57e-19	0.529163	0.797	0.644	1.09e-14	1.08e-232	0.86244	0.996	0.875	2.59e-228	1.04e-85	0.701373	0.948	0.821	2.49e-81	3.72e-108	0.784553	0.953	0.808	8.87e-104	1.86e-261	0.86959	0.987	0.813	4.43e-257	9.41e-08	1.11e-260
Radial Glia	0	IFI6	7.85e-17	0.290156	0.32	0.108	1.88e-12	5e-25	0.419761	0.375	0.157	1.19e-20	5.92e-258	0.888632	0.778	0.274	1.41e-253	2.37e-67	0.439959	0.487	0.214	5.66e-63	1.29e-40	0.388657	0.48	0.259	3.08e-36	1.12e-256	0.756948	0.674	0.236	2.67e-252	7.85e-17	3.55e-257
Radial Glia	0	CLU	3.87e-18	0.974398	0.837	0.606	9.24e-14	3.05e-54	1.15798	0.914	0.708	7.28e-50	1.16e-248	1.37803	0.963	0.578	2.76e-244	3.1e-144	1.51554	0.877	0.521	7.41e-140	6.3e-128	1.51969	0.907	0.651	1.5e-123	6.77e-254	1.13029	0.922	0.535	1.62e-249	3.87e-18	4.06e-253
Radial Glia	0	CALR	4.64e-14	0.814743	0.804	0.565	1.11e-09	1.23e-19	0.697612	0.734	0.541	2.94e-15	3.13e-180	0.774255	0.997	0.871	7.47e-176	6.95e-52	0.521818	0.93	0.809	1.66e-47	2.68e-25	0.322371	0.923	0.828	6.4e-21	4.1e-243	0.888323	0.998	0.85	9.79e-239	4.64e-14	2.46e-242
Radial Glia	0	MAF	1.31e-39	0.546739	0.229	0.03	3.13e-35	5.23e-59	0.502178	0.282	0.053	1.25e-54	1.62e-238	0.815764	0.79	0.29	3.86e-234	1.59e-131	0.48881	0.366	0.077	3.79e-127	3.21e-121	0.482619	0.337	0.069	7.65e-117	2.34e-229	0.726174	0.656	0.233	5.59e-225	1.31e-39	9.69e-238
Radial Glia	0	SERF2	4.97e-09	0.376839	0.967	0.894	0.000118712	5.26e-13	0.371208	0.927	0.883	1.26e-08	8.66e-232	0.665094	1	0.971	2.07e-227	6.41e-119	0.576948	0.994	0.974	1.53e-114	9.87e-74	0.452922	0.997	0.973	2.36e-69	9.49e-192	0.536913	1	0.968	2.27e-187	4.97e-09	5.2e-231
Radial Glia	0	IFITM3	7.86e-37	1.20299	0.556	0.184	1.88e-32	1.42e-39	0.776656	0.455	0.167	3.39e-35	1.51e-227	0.822981	0.646	0.175	3.59e-223	5.72e-88	0.808124	0.531	0.21	1.37e-83	3.82e-88	0.498778	0.46	0.157	9.12e-84	7.85e-188	0.687323	0.489	0.144	1.87e-183	7.86e-37	9.03e-227
Radial Glia	0	PDIA3	3.32e-10	0.60907	0.732	0.585	7.93e-06	4.46e-15	0.51817	0.731	0.563	1.06e-10	1.5e-177	0.698744	0.99	0.855	3.58e-173	8.34e-38	0.400294	0.941	0.822	1.99e-33	1.87e-25	0.290964	0.927	0.856	4.47e-21	1.9e-226	0.759904	0.992	0.835	4.54e-222	3.32e-10	1.14e-225
Radial Glia	0	HSPA5	3.93e-07	0.889517	0.725	0.594	0.00937964	2.99e-26	0.990409	0.757	0.556	7.14e-22	1.24e-140	0.707519	0.99	0.86	2.96e-136	6.29e-26	0.372859	0.929	0.825	1.5e-21	6e-21	0.327082	0.938	0.852	1.43e-16	3.52e-219	0.87223	0.998	0.857	8.4e-215	3.93e-07	2.11e-218
Radial Glia	0	PSAP	1.85e-19	0.757435	0.876	0.681	4.41e-15	3.85e-29	0.721012	0.834	0.679	9.2e-25	3.35e-193	0.754605	0.993	0.835	8.01e-189	6.95e-140	0.922397	0.95	0.731	1.66e-135	2.85e-79	0.680686	0.918	0.734	6.82e-75	1.08e-216	0.705006	0.987	0.823	2.59e-212	1.85e-19	6.51e-216
Radial Glia	0	TMED9	0.000268791	0.281062	0.667	0.565	1	4.93e-14	0.361553	0.691	0.515	1.18e-09	7.75e-191	0.706644	0.983	0.774	1.85e-186	2.53e-73	0.573464	0.881	0.687	6.03e-69	1.34e-31	0.374164	0.86	0.734	3.19e-27	7.76e-215	0.701728	0.98	0.754	1.85e-210	0.000268791	4.66e-214
Radial Glia	0	CDO1	5.27e-15	0.608917	0.529	0.27	1.26e-10	4.23e-13	0.354364	0.389	0.218	1.01e-08	5.5e-208	0.853274	0.97	0.648	1.31e-203	3.81e-66	0.590535	0.702	0.423	9.09e-62	4.86e-47	0.522465	0.665	0.42	1.16e-42	5.48e-205	0.8115	0.939	0.614	1.31e-200	4.23e-13	3.3e-207
Radial Glia	0	LIX1	1.28e-05	0.333002	0.163	0.072	0.306171	2.37e-45	0.833217	0.412	0.133	5.66e-41	1.28e-113	0.304911	0.429	0.128	3.06e-109	1.61e-104	0.792772	0.57	0.22	3.84e-100	1.71e-107	0.814114	0.487	0.16	4.08e-103	9.16e-208	0.458358	0.394	0.085	2.19e-203	1.28e-05	5.5e-207
Radial Glia	0	HSP90B1	1.41e-14	0.776948	0.83	0.687	3.37e-10	2.91e-22	0.69497	0.811	0.624	6.96e-18	1.9e-133	0.702891	0.992	0.855	4.53e-129	1.29e-33	0.393254	0.953	0.863	3.07e-29	1.94e-20	0.281494	0.959	0.875	4.62e-16	8.92e-206	0.851032	0.994	0.85	2.13e-201	1.41e-14	5.35e-205
Radial Glia	0	TTYH1	5.31e-10	0.557967	0.837	0.646	1.27e-05	8.59e-20	0.583814	0.817	0.611	2.05e-15	1.12e-106	0.750081	0.973	0.692	2.67e-102	1.45e-34	0.575045	0.889	0.714	3.46e-30	4.59e-32	0.484888	0.939	0.772	1.1e-27	1.17e-200	0.930896	0.987	0.702	2.78e-196	5.31e-10	6.99e-200
Radial Glia	0	ID3	2.49e-09	0.933989	0.386	0.207	5.94e-05	5.81e-18	1.05049	0.455	0.26	1.39e-13	9.59e-174	1.10447	0.966	0.585	2.29e-169	4.42e-196	1.87696	0.89	0.483	1.05e-191	1.37e-116	1.45635	0.798	0.45	3.28e-112	4.12e-169	0.947568	0.941	0.576	9.83e-165	2.49e-09	2.65e-195
Radial Glia	0	GNG11	1.77e-52	1.19671	0.542	0.137	4.23e-48	2.4e-19	0.823607	0.429	0.226	5.72e-15	7.61e-141	0.915904	0.856	0.471	1.82e-136	6.13e-165	1.59879	0.822	0.421	1.46e-160	7.57e-94	1.06521	0.812	0.534	1.81e-89	2.03e-195	0.905403	0.831	0.429	4.86e-191	2.4e-19	1.22e-194
Radial Glia	0	PON2	1.02e-18	0.93037	0.549	0.275	2.44e-14	5.19e-24	0.668071	0.545	0.297	1.24e-19	1.04e-191	0.852637	0.968	0.583	2.48e-187	2.01e-165	1.1338	0.893	0.543	4.81e-161	1.08e-88	0.894645	0.86	0.586	2.58e-84	4.26e-166	0.683713	0.95	0.613	1.02e-161	1.02e-18	6.23e-191
Radial Glia	0	ANXA5	1.2e-10	0.442724	0.569	0.35	2.86e-06	3.97e-14	0.425202	0.551	0.362	9.49e-10	2.74e-190	0.765426	0.936	0.552	6.53e-186	1.89e-73	0.611683	0.829	0.551	4.51e-69	6.03e-46	0.447976	0.803	0.583	1.44e-41	9.94e-172	0.671266	0.868	0.509	2.37e-167	1.2e-10	1.64e-189
Radial Glia	0	HES1	1.44e-24	0.853115	0.712	0.359	3.45e-20	3.26e-28	0.636365	0.688	0.4	7.78e-24	3.72e-185	0.903106	0.912	0.45	8.89e-181	2.02e-104	0.925277	0.785	0.44	4.83e-100	3.29e-95	0.837212	0.692	0.339	7.86e-91	8.18e-157	0.640459	0.889	0.47	1.95e-152	1.44e-24	2.23e-184
Radial Glia	0	LGALS3BP	3.56e-19	0.448509	0.366	0.122	8.5e-15	6.62e-17	0.46038	0.355	0.173	1.58e-12	1.54e-143	0.596307	0.739	0.352	3.68e-139	1.92e-93	0.5979	0.524	0.204	4.57e-89	2.35e-110	0.597836	0.513	0.171	5.62e-106	2.66e-180	0.615771	0.664	0.278	6.35e-176	6.62e-17	1.6e-179
Radial Glia	0	PCSK1	3.58e-14	0.616411	0.163	0.039	8.55e-10	4.63e-06	0.363408	0.126	0.062	0.11062	3.61e-76	0.854794	0.389	0.155	8.61e-72	1.28e-06	0.516942	0.251	0.186	0.0306661	2.86e-28	0.579076	0.167	0.058	6.83e-24	4.09e-178	1.14003	0.553	0.201	9.75e-174	4.63e-06	2.45e-177
Radial Glia	0	CETN2	1.08e-14	0.620717	0.641	0.389	2.57e-10	4.69e-21	0.495586	0.581	0.338	1.12e-16	2.27e-148	0.669568	0.942	0.653	5.41e-144	1.01e-55	0.543327	0.782	0.561	2.4e-51	5.78e-47	0.448231	0.772	0.557	1.38e-42	6.7e-174	0.683578	0.92	0.647	1.6e-169	1.08e-14	4.02e-173
Radial Glia	0	AEBP1	4.36e-14	0.271252	0.34	0.132	1.04e-09	9.71e-27	0.668364	0.385	0.168	2.32e-22	3.05e-150	0.581758	0.653	0.264	7.28e-146	1.04e-67	0.436555	0.364	0.127	2.48e-63	2.63e-34	0.271309	0.297	0.131	6.28e-30	2.65e-173	0.550193	0.603	0.233	6.34e-169	4.36e-14	1.59e-172
Radial Glia	0	TFPI2	2.76e-113	1.67668	0.477	0.049	6.59e-109	2.46e-44	1.36146	0.309	0.08	5.87e-40	5.58e-59	0.778219	0.338	0.138	1.33e-54	9.9e-168	1.77676	0.507	0.129	2.36e-163	3.03e-87	1.45302	0.577	0.262	7.24e-83	2.31e-48	0.632999	0.266	0.116	5.53e-44	2.46e-44	5.94e-167
Radial Glia	0	APCDD1	8.07e-12	0.284089	0.261	0.096	1.93e-07	4.67e-39	0.843901	0.389	0.136	1.11e-34	3.62e-166	0.998915	0.904	0.481	8.65e-162	2.74e-59	0.837611	0.611	0.351	6.54e-55	4.3e-103	1.16508	0.698	0.343	1.03e-98	1.9e-167	0.943704	0.902	0.521	4.54e-163	8.07e-12	1.14e-166
Radial Glia	0	CALU	8.82e-07	0.431389	0.725	0.557	0.0210535	3.36e-15	0.439773	0.708	0.542	8.02e-11	1.25e-161	0.737336	0.965	0.683	2.98e-157	2.29e-40	0.493403	0.792	0.603	5.47e-36	3.97e-31	0.412163	0.821	0.652	9.48e-27	2.36e-167	0.654164	0.937	0.655	5.63e-163	8.82e-07	1.41e-166
Radial Glia	0	PEG10	2.88e-51	2.37403	0.954	0.707	6.87e-47	5.92e-25	1.3818	0.904	0.824	1.41e-20	1.57e-62	0.568933	0.981	0.849	3.74e-58	3.13e-167	1.7016	0.981	0.868	7.47e-163	1.99e-108	1.32957	0.956	0.816	4.76e-104	2.17e-42	0.403329	0.985	0.869	5.18e-38	5.92e-25	1.88e-166
Radial Glia	0	CD63	1.23e-13	0.640435	0.791	0.698	2.94e-09	1.25e-11	0.299937	0.801	0.663	2.98e-07	3.25e-154	0.53391	0.996	0.92	7.77e-150	4.91e-107	0.694654	0.984	0.899	1.17e-102	8.5e-88	0.582508	0.974	0.913	2.03e-83	2.93e-166	0.542667	0.996	0.904	6.99e-162	1.25e-11	1.76e-165
Radial Glia	0	HMGN3	3.16e-10	0.438745	0.745	0.513	7.54e-06	4.46e-11	0.446688	0.678	0.515	1.07e-06	3.75e-166	0.674454	0.988	0.759	8.96e-162	1.78e-79	0.625008	0.945	0.78	4.25e-75	8.66e-60	0.546558	0.932	0.775	2.07e-55	9.88e-149	0.597067	0.953	0.71	2.36e-144	3.16e-10	2.25e-165
Radial Glia	0	PTN	2.4e-17	1.65356	0.595	0.333	5.73e-13	1.17e-48	1.46958	0.711	0.367	2.8e-44	5.71e-107	1.07179	0.851	0.511	1.36e-102	1.87e-140	2.16599	0.915	0.639	4.48e-136	1.42e-56	1.64604	0.809	0.621	3.38e-52	1.07e-164	1.10831	0.868	0.492	2.55e-160	2.4e-17	6.4e-164
Radial Glia	0	CST3	7.01e-08	0.578171	0.627	0.475	0.00167469	1.92e-12	0.434167	0.595	0.426	4.59e-08	8.46e-160	0.68406	0.99	0.877	2.02e-155	1.49e-103	0.761789	0.958	0.794	3.57e-99	3.53e-98	0.743991	0.947	0.836	8.43e-94	2.68e-161	0.629994	0.982	0.843	6.4e-157	7.01e-08	1.61e-160
Radial Glia	0	CTSL	3.13e-10	0.388033	0.431	0.226	7.47e-06	2.33e-12	0.427694	0.415	0.248	5.56e-08	2.2e-133	0.540518	0.744	0.369	5.26e-129	1.37e-60	0.483693	0.588	0.314	3.28e-56	3.36e-51	0.466997	0.713	0.465	8.03e-47	3.36e-158	0.556621	0.681	0.312	8.01e-154	3.13e-10	2.01e-157
Radial Glia	0	B3GNT1	1.04e-08	0.688238	0.392	0.209	0.000247891	1.17e-15	0.332908	0.316	0.147	2.78e-11	6.09e-156	0.615349	0.866	0.503	1.45e-151	9.71e-39	0.357427	0.504	0.291	2.32e-34	1.05e-48	0.412112	0.575	0.318	2.5e-44	4.95e-153	0.611909	0.798	0.453	1.18e-148	1.04e-08	3.65e-155
Radial Glia	0	OST4	3.4e-20	0.63993	0.941	0.812	8.11e-16	1.45e-14	0.452378	0.864	0.793	3.46e-10	2.48e-155	0.580586	0.991	0.923	5.91e-151	8.21e-94	0.622924	0.973	0.89	1.96e-89	1.87e-94	0.581957	0.965	0.905	4.46e-90	1.44e-137	0.505394	0.989	0.897	3.44e-133	1.45e-14	1.49e-154
Radial Glia	0	ZIC4	8.29e-46	0.621747	0.379	0.071	1.98e-41	5.46e-37	0.559428	0.389	0.131	1.3e-32	3.12e-73	0.332349	0.436	0.184	7.45e-69	1.72e-154	0.792962	0.647	0.224	4.1e-150	1.14e-109	0.801669	0.662	0.294	2.73e-105	1.12e-106	0.418151	0.493	0.21	2.67e-102	5.46e-37	1.03e-153
Radial Glia	0	KDELR1	7.58e-08	0.428498	0.876	0.782	0.00180888	4.51e-05	0.273562	0.804	0.753	1	2.08e-144	0.561885	0.992	0.906	4.98e-140	2.53e-67	0.53715	0.963	0.881	6.03e-63	9.13e-62	0.492341	0.958	0.881	2.18e-57	1.27e-153	0.559776	0.993	0.903	3.03e-149	4.51e-05	7.62e-153
Radial Glia	0	PPIB	1.99e-13	0.541634	0.824	0.645	4.75e-09	2.31e-09	0.361739	0.728	0.606	5.52e-05	5.03e-139	0.586704	0.995	0.893	1.2e-134	1.38e-49	0.380309	0.953	0.869	3.31e-45	1.1e-37	0.34943	0.956	0.878	2.62e-33	3.22e-153	0.559846	0.99	0.873	7.7e-149	2.31e-09	1.93e-152
Radial Glia	0	CHPF	1.31e-12	0.418263	0.294	0.112	3.13e-08	1.1e-22	0.355289	0.266	0.095	2.63e-18	2.11e-144	0.613216	0.678	0.295	5.04e-140	4.42e-81	0.535438	0.372	0.12	1.06e-76	6.08e-71	0.36769	0.378	0.128	1.45e-66	1.07e-149	0.558098	0.588	0.246	2.55e-145	1.31e-12	6.4e-149
Radial Glia	0	SDC2	4.18e-53	0.883674	0.471	0.099	9.98e-49	4.38e-42	0.608241	0.449	0.16	1.04e-37	6.54e-148	0.61352	0.621	0.237	1.56e-143	3.69e-109	0.962145	0.567	0.233	8.81e-105	1.15e-123	1.07447	0.599	0.228	2.74e-119	9.68e-144	0.494795	0.505	0.188	2.31e-139	4.38e-42	3.92e-147
Radial Glia	0	SELM	4.4e-25	0.553905	0.379	0.113	1.05e-20	1.48e-28	0.494167	0.432	0.184	3.54e-24	1.26e-146	0.604495	0.646	0.259	3e-142	3.9e-99	0.767227	0.595	0.261	9.31e-95	4.06e-87	0.693975	0.649	0.318	9.69e-83	4.1e-125	0.492527	0.527	0.22	9.79e-121	4.4e-25	7.55e-146
Radial Glia	0	DLK1	9.27e-27	3.25619	0.765	0.541	2.21e-22	5.07e-36	2.57753	0.807	0.647	1.21e-31	2.21e-91	1.57701	0.896	0.695	5.27e-87	1.19e-31	1.49533	0.8	0.745	2.84e-27	6.73e-67	1.19146	0.956	0.9	1.61e-62	1.78e-143	1.73753	0.89	0.677	4.25e-139	9.27e-27	1.07e-142
Radial Glia	0	MORN2	1.18e-15	0.507008	0.425	0.188	2.81e-11	1.75e-10	0.286041	0.276	0.145	4.18e-06	3.97e-141	0.547261	0.865	0.526	9.48e-137	1.62e-62	0.557387	0.703	0.45	3.86e-58	1.13e-36	0.416746	0.689	0.487	2.71e-32	1.72e-101	0.440594	0.726	0.443	4.1e-97	1.75e-10	2.38e-140
Radial Glia	0	TLE4	1.81e-05	0.343494	0.647	0.513	0.431635	8.84e-08	0.276536	0.608	0.485	0.00211079	8.77e-122	0.646867	0.965	0.725	2.09e-117	2.86e-70	0.744614	0.88	0.731	6.83e-66	1.01e-34	0.438747	0.856	0.705	2.41e-30	1.77e-139	0.622959	0.971	0.793	4.22e-135	1.81e-05	1.06e-138
Radial Glia	0	NTRK2	3.74e-05	0.594151	0.497	0.368	0.89381	1.18e-07	0.274271	0.462	0.313	0.00280789	3.8e-99	0.571347	0.868	0.466	9.08e-95	1.78e-67	0.774128	0.742	0.454	4.25e-63	2.05e-08	0.272151	0.624	0.519	0.000488878	1.21e-134	0.633205	0.895	0.485	2.88e-130	3.74e-05	7.23e-134
Radial Glia	0	CLIC1	1.41e-22	0.960066	0.752	0.448	3.36e-18	6.02e-14	0.439845	0.638	0.466	1.44e-09	4.82e-112	0.50846	0.967	0.708	1.15e-107	2.65e-81	0.620806	0.958	0.744	6.32e-77	1.79e-80	0.620342	0.941	0.782	4.26e-76	2.01e-132	0.561029	0.967	0.717	4.8e-128	6.02e-14	1.21e-131
Radial Glia	0	GGH	1e-10	0.33639	0.386	0.185	2.4e-06	2.24e-21	0.464252	0.452	0.229	5.36e-17	6.6e-111	0.501584	0.851	0.488	1.58e-106	1.19e-53	0.464289	0.634	0.383	2.84e-49	2.99e-33	0.389363	0.586	0.383	7.15e-29	2.12e-128	0.527747	0.798	0.455	5.07e-124	1e-10	1.27e-127
Radial Glia	0	WNT4	0.00408592	0.259719	0.111	0.059	1	2.26e-78	1.1575	0.346	0.063	5.39e-74	9.02e-40	0.288065	0.395	0.203	2.15e-35	1.7e-14	0.362179	0.2	0.107	4.06e-10	2.45e-38	0.959158	0.376	0.192	5.85e-34	7.24e-126	0.685032	0.48	0.192	1.73e-121	0.00408592	4.35e-125
Radial Glia	0	SPINT2	1.52e-08	0.262226	0.294	0.135	0.000362853	3.56e-18	0.382771	0.329	0.148	8.51e-14	4.51e-103	0.673305	0.669	0.338	1.08e-98	1.37e-77	0.572432	0.49	0.195	3.26e-73	1.61e-115	0.744862	0.545	0.186	3.85e-111	1.92e-125	0.642493	0.604	0.29	4.58e-121	1.52e-08	1.15e-124
Radial Glia	0	LHFP	2.53e-17	0.771337	0.477	0.217	6.05e-13	1.49e-21	0.469752	0.409	0.189	3.55e-17	5.36e-114	0.542311	0.747	0.393	1.28e-109	4.12e-88	0.889031	0.626	0.312	9.84e-84	2.72e-67	0.719321	0.575	0.299	6.49e-63	1.01e-124	0.544445	0.691	0.353	2.41e-120	2.53e-17	6.05e-124
Radial Glia	0	RHOC	2.52e-13	0.463595	0.516	0.263	6.02e-09	6.67e-15	0.346038	0.485	0.287	1.59e-10	1.28e-117	0.510613	0.803	0.437	3.05e-113	2.97e-86	0.70432	0.774	0.453	7.09e-82	5.96e-80	0.697306	0.766	0.47	1.42e-75	3.52e-124	0.499896	0.779	0.438	8.4e-120	2.52e-13	2.11e-123
Radial Glia	0	P4HB	8.16e-12	0.519235	0.693	0.464	1.95e-07	1.02e-11	0.337541	0.611	0.435	2.45e-07	2.57e-123	0.567893	0.949	0.711	6.13e-119	3.64e-32	0.355932	0.809	0.65	8.7e-28	2.04e-41	0.447523	0.835	0.673	4.88e-37	1.8e-122	0.513718	0.942	0.69	4.3e-118	1.02e-11	1.54e-122
Radial Glia	0	IFI27L2	2.67e-08	0.374607	0.673	0.469	0.00063826	5.46e-09	0.361553	0.628	0.494	0.000130447	5.32e-102	0.45017	0.848	0.512	1.27e-97	8.35e-62	0.597312	0.8	0.571	1.99e-57	9.45e-46	0.473634	0.789	0.576	2.26e-41	2.25e-122	0.512761	0.766	0.433	5.38e-118	2.67e-08	1.35e-121
Radial Glia	0	SPRY1	3.35e-24	0.553924	0.418	0.132	8.01e-20	1.15e-28	0.715863	0.382	0.151	2.74e-24	1.85e-111	0.406428	0.57	0.226	4.42e-107	2.11e-74	0.501772	0.346	0.108	5.04e-70	2.55e-76	0.502454	0.3	0.081	6.08e-72	3.6e-117	0.426003	0.5	0.2	8.6e-113	3.35e-24	2.16e-116
Radial Glia	0	TMED4	3.2e-10	0.457843	0.732	0.504	7.63e-06	1.26e-14	0.40506	0.635	0.448	3.02e-10	6.41e-84	0.440531	0.903	0.68	1.53e-79	1.49e-56	0.510094	0.791	0.584	3.55e-52	1.49e-36	0.393143	0.765	0.588	3.56e-32	6.72e-112	0.467671	0.867	0.613	1.61e-107	3.2e-10	4.03e-111
Radial Glia	0	ATRAID	1.31e-13	0.61963	0.66	0.413	3.12e-09	2.86e-12	0.385068	0.538	0.371	6.82e-08	2.15e-111	0.504122	0.943	0.697	5.13e-107	1.92e-50	0.477357	0.828	0.625	4.58e-46	4.14e-38	0.394448	0.841	0.692	9.89e-34	5.4e-87	0.430217	0.899	0.663	1.29e-82	2.86e-12	1.29e-110
Radial Glia	0	SAT1	5.31e-20	1.2455	0.824	0.528	1.27e-15	1.38e-26	0.949626	0.711	0.463	3.3e-22	5.91e-108	0.593043	0.837	0.514	1.41e-103	3.64e-16	0.452704	0.591	0.458	8.69e-12	1.68e-37	0.648937	0.83	0.65	4e-33	5.57e-111	0.622762	0.843	0.553	1.33e-106	3.64e-16	3.34e-110
Radial Glia	0	ZIC2	2.68e-18	0.825268	0.536	0.239	6.4e-14	7.78e-40	0.824332	0.691	0.352	1.86e-35	4e-110	0.559525	0.93	0.612	9.56e-106	1.04e-68	0.569277	0.782	0.493	2.49e-64	6.86e-39	0.40558	0.797	0.588	1.64e-34	6.46e-86	0.417547	0.905	0.621	1.54e-81	2.68e-18	2.4e-109
Radial Glia	0	ZIC1	3.69e-63	1.11828	0.693	0.171	8.81e-59	9.74e-44	0.786111	0.714	0.356	2.33e-39	5.07e-58	0.515404	0.644	0.393	1.21e-53	8.18e-107	0.777778	0.875	0.518	1.95e-102	1.66e-47	0.493529	0.813	0.568	3.96e-43	5.93e-104	0.683118	0.739	0.47	1.42e-99	9.74e-44	4.91e-106
Radial Glia	0	C1orf122	2.3e-09	0.3451	0.654	0.421	5.5e-05	1.12e-08	0.345742	0.578	0.442	0.000266254	2.82e-103	0.514793	0.959	0.813	6.74e-99	4.64e-74	0.651902	0.892	0.731	1.11e-69	1.03e-79	0.639336	0.894	0.715	2.45e-75	1.42e-80	0.396972	0.908	0.748	3.39e-76	1.12e-08	1.69e-102
Radial Glia	0	WNT3	2.31e-17	0.50207	0.346	0.122	5.51e-13	8.65e-49	0.943975	0.581	0.247	2.07e-44	2.04e-80	0.380274	0.706	0.382	4.87e-76	2.15e-87	0.743346	0.607	0.291	5.12e-83	6.16e-73	0.711898	0.615	0.315	1.47e-68	6.95e-97	0.39823	0.631	0.328	1.66e-92	2.31e-17	4.17e-96
Radial Glia	0	BLVRB	7.09e-27	0.79599	0.49	0.174	1.69e-22	1.89e-18	0.451286	0.505	0.293	4.52e-14	5.36e-69	0.332199	0.719	0.428	1.28e-64	2.29e-95	0.650957	0.715	0.379	5.46e-91	6.91e-91	0.645495	0.768	0.451	1.65e-86	4.92e-84	0.382266	0.654	0.368	1.17e-79	1.89e-18	1.37e-94
Radial Glia	0	OBSL1	9.6e-15	0.504907	0.51	0.244	2.29e-10	3.5e-09	0.319734	0.372	0.232	8.37e-05	3.09e-88	0.442101	0.694	0.396	7.37e-84	1.7e-68	0.588343	0.562	0.291	4.05e-64	2.29e-44	0.414744	0.561	0.331	5.47e-40	7.76e-95	0.406627	0.642	0.357	1.85e-90	3.5e-09	4.66e-94
Radial Glia	0	EMC2	2.42e-14	0.608997	0.471	0.232	5.77e-10	1.71e-22	0.472363	0.429	0.214	4.08e-18	2.92e-91	0.409784	0.713	0.393	6.96e-87	5.46e-76	0.779356	0.629	0.346	1.3e-71	9.34e-53	0.597605	0.612	0.366	2.23e-48	4.34e-72	0.341624	0.621	0.371	1.04e-67	2.42e-14	1.75e-90
Radial Glia	0	CDH2	3.18e-13	0.627331	0.843	0.69	7.58e-09	1.22e-34	0.785869	0.874	0.687	2.91e-30	1.58e-41	0.320919	0.97	0.839	3.77e-37	6.16e-89	0.815999	0.95	0.802	1.47e-84	4.21e-66	0.727847	0.915	0.773	1e-61	5.15e-80	0.424205	0.962	0.81	1.23e-75	3.18e-13	3.7e-88
Radial Glia	0	CYSTM1	1.88e-13	0.407704	0.464	0.222	4.48e-09	5.39e-19	0.518437	0.472	0.261	1.29e-14	1.49e-87	0.379115	0.703	0.379	3.55e-83	2.25e-80	0.676752	0.666	0.37	5.37e-76	2.96e-83	0.648542	0.687	0.368	7.06e-79	7.08e-84	0.378233	0.616	0.339	1.69e-79	1.88e-13	8.93e-87
Radial Glia	0	TPM1	1.16e-16	0.691475	0.614	0.337	2.77e-12	1.03e-09	0.355445	0.512	0.363	2.45e-05	6.56e-86	0.868922	0.807	0.56	1.57e-81	7.81e-75	1.04299	0.726	0.484	1.86e-70	2.08e-38	0.869591	0.697	0.502	4.98e-34	2.06e-87	0.742959	0.761	0.533	4.93e-83	1.03e-09	1.24e-86
Radial Glia	0	ATP2B1	1.74e-10	0.504754	0.634	0.424	4.16e-06	1.5e-09	0.355959	0.625	0.468	3.58e-05	8.65e-45	0.34513	0.898	0.711	2.07e-40	2.4e-47	0.617622	0.812	0.634	5.72e-43	1.18e-64	0.812745	0.829	0.645	2.82e-60	3.27e-46	0.328988	0.877	0.69	7.8e-42	1.5e-09	7.09e-64
Radial Glia	0	HES4	1.81e-15	1.06679	0.876	0.719	4.32e-11	1.38e-32	0.918169	0.91	0.722	3.3e-28	3.52e-24	0.309232	0.901	0.797	8.4e-20	1.68e-50	0.608057	0.939	0.852	4e-46	9.16e-35	0.58609	0.932	0.863	2.19e-30	6.29e-61	0.39463	0.946	0.789	1.5e-56	1.81e-15	3.77e-60
Radial Glia	0	CA2	1.05e-08	0.600661	0.301	0.151	0.000251495	1.61e-55	1.14185	0.432	0.128	3.84e-51	1.4e-47	0.339475	0.337	0.15	3.34e-43	9.77e-45	0.51851	0.279	0.104	2.33e-40	4.78e-45	0.513419	0.317	0.127	1.14e-40	1.16e-29	0.278021	0.241	0.123	2.76e-25	1.05e-08	9.65e-55
Radial Glia	0	DIO3	1.91e-08	0.678344	0.203	0.081	0.000455243	1.28e-11	0.87883	0.236	0.113	3.05e-07	2.86e-23	0.601575	0.156	0.065	6.84e-19	1.28e-08	0.907554	0.178	0.111	0.000304621	1.61e-06	0.665186	0.302	0.23	0.0384275	3.65e-17	0.446839	0.137	0.069	8.7e-13	1.61e-06	1.72e-22
Radial Glia	1	SCUBE2	1.03e-172	0.855622	0.563	0.172	2.47e-168	8.65e-184	0.945734	0.45	0.082	2.07e-179	2.81e-19	0.446459	0.216	0.06	6.71e-15	1.03e-237	1.11532	0.634	0.143	2.45e-233	3.63e-203	0.978588	0.766	0.31	8.66e-199	1.92e-18	0.256701	0.151	0.044	4.59e-14	1.92e-18	6.15e-237
Radial Glia	1	VIM	7.65e-231	1.15124	0.998	0.935	1.83e-226	2.75e-146	1.09445	0.989	0.914	6.57e-142	1.24e-24	0.702793	1	0.896	2.97e-20	1.62e-154	1.07333	0.998	0.938	3.87e-150	2.32e-189	0.855465	1	0.952	5.55e-185	4.03e-33	0.603637	1	0.918	9.62e-29	1.24e-24	4.59e-230
Radial Glia	1	HES5	5.18e-105	0.978904	0.647	0.321	1.24e-100	1.82e-25	0.65112	0.458	0.284	4.34e-21	0.0159703	0.355895	0.316	0.255	1	5.34e-157	1.49768	0.873	0.471	1.27e-152	2.59e-219	1.48584	0.913	0.538	6.19e-215	7.17e-07	0.611706	0.349	0.245	0.0171163	0.0159703	1.56e-218
Radial Glia	1	FGFBP3	9.47e-209	1.41478	0.88	0.502	2.26e-204	1.74e-120	1.40724	0.718	0.37	4.16e-116	1.81e-06	0.873333	0.384	0.274	0.0433098	1.88e-153	1.38807	0.699	0.278	4.48e-149	2.54e-108	0.920132	0.748	0.427	6.07e-104	4.23e-05	0.41712	0.399	0.32	1	4.23e-05	5.68e-208
Radial Glia	1	RPS18	1.4e-57	0.424971	0.997	0.986	3.34e-53	1.09e-85	0.583232	0.999	0.986	2.6e-81	7.97e-35	0.60334	1	0.987	1.9e-30	2.41e-122	0.552222	1	0.994	5.76e-118	3.75e-194	0.535769	1	0.998	8.95e-190	7.13e-49	0.557788	1	0.984	1.7e-44	7.97e-35	2.25e-193
Radial Glia	1	RPS14	5.96e-47	0.378107	0.99	0.975	1.42e-42	5.06e-72	0.539967	0.997	0.975	1.21e-67	3.84e-38	0.572551	1	0.988	9.17e-34	3.07e-135	0.539828	1	0.995	7.33e-131	2.84e-188	0.48564	1	0.996	6.77e-184	3.08e-58	0.555158	0.997	0.983	7.36e-54	3.84e-38	1.7e-187
Radial Glia	1	RPS25	6.24e-53	0.368195	0.992	0.973	1.49e-48	9.05e-87	0.525435	0.996	0.975	2.16e-82	1.98e-28	0.495669	0.984	0.982	4.73e-24	1.34e-93	0.445935	0.998	0.987	3.19e-89	3.71e-186	0.510163	1	0.988	8.85e-182	3.21e-27	0.413276	0.993	0.97	7.66e-23	3.21e-27	2.22e-185
Radial Glia	1	RPL13	1.04e-47	0.365358	1	0.997	2.49e-43	3.39e-80	0.536412	1	0.995	8.1e-76	1.1e-37	0.529009	1	0.991	2.63e-33	7.99e-94	0.434019	1	0.997	1.91e-89	1.71e-181	0.450543	1	0.998	4.08e-177	9.26e-54	0.503311	1	0.992	2.21e-49	1.1e-37	1.03e-180
Radial Glia	1	RPS8	7.19e-54	0.372336	1	0.992	1.72e-49	2.48e-76	0.516033	1	0.993	5.92e-72	7.71e-29	0.507772	0.974	0.983	1.84e-24	1.34e-100	0.434044	1	0.996	3.21e-96	6.39e-180	0.471236	1	0.998	1.52e-175	1.02e-57	0.537951	0.997	0.982	2.42e-53	7.71e-29	3.83e-179
Radial Glia	1	RPL18A	1.03e-32	0.310471	0.996	0.985	2.46e-28	5.17e-81	0.544672	0.997	0.989	1.24e-76	1.06e-24	0.441048	0.989	0.99	2.52e-20	1.59e-81	0.394154	1	0.993	3.79e-77	9.14e-172	0.446122	1	0.995	2.18e-167	1.48e-34	0.424032	1	0.983	3.53e-30	1.06e-24	5.49e-171
Radial Glia	1	RPL3	4.68e-54	0.392223	0.996	0.983	1.12e-49	6.77e-68	0.509237	0.993	0.979	1.62e-63	1.87e-28	0.470444	0.995	0.989	4.48e-24	3.45e-117	0.516945	1	0.994	8.25e-113	9.18e-172	0.469517	1	0.996	2.19e-167	2.11e-37	0.438798	0.997	0.985	5.04e-33	1.87e-28	5.51e-171
Radial Glia	1	RPL29	4.78e-47	0.378695	0.995	0.977	1.14e-42	1.81e-87	0.583339	0.997	0.981	4.32e-83	4.77e-40	0.577909	0.995	0.988	1.14e-35	1.52e-144	0.601107	1	0.993	3.64e-140	7.65e-171	0.517543	1	0.994	1.83e-166	6.06e-61	0.560343	1	0.985	1.45e-56	4.77e-40	4.59e-170
Radial Glia	1	RPL10A	4.72e-58	0.426323	0.988	0.955	1.13e-53	1.35e-66	0.539006	0.99	0.956	3.22e-62	2.18e-32	0.529413	0.989	0.981	5.2e-28	2.88e-88	0.517975	1	0.979	6.86e-84	6.73e-168	0.528666	1	0.983	1.61e-163	2.89e-44	0.507097	0.997	0.972	6.89e-40	2.18e-32	4.04e-167
Radial Glia	1	RPS24	2.39e-44	0.349565	1	0.99	5.71e-40	1.42e-65	0.495467	1	0.992	3.38e-61	6.64e-47	0.677377	1	0.992	1.59e-42	6.82e-96	0.441061	0.998	0.994	1.63e-91	2.04e-167	0.466167	1	0.995	4.87e-163	7.4e-61	0.561931	1	0.99	1.77e-56	2.39e-44	1.23e-166
Radial Glia	1	RPL6	6.89e-53	0.328629	0.998	0.992	1.65e-48	8.18e-82	0.498782	0.999	0.992	1.95e-77	9.91e-35	0.4836	1	0.991	2.36e-30	5.69e-117	0.442798	1	0.996	1.36e-112	6.38e-167	0.430621	1	0.997	1.52e-162	1.15e-46	0.436792	0.997	0.989	2.75e-42	9.91e-35	3.83e-166
Radial Glia	1	RPL12	2.68e-55	0.4562	0.99	0.963	6.41e-51	3.48e-86	0.63781	0.996	0.968	8.31e-82	2.11e-31	0.602468	1	0.982	5.03e-27	3.12e-119	0.591919	0.998	0.991	7.45e-115	2e-166	0.562625	1	0.991	4.77e-162	4.85e-56	0.637497	0.993	0.98	1.16e-51	2.11e-31	1.2e-165
Radial Glia	1	RPL32	5.62e-44	0.350804	0.998	0.986	1.34e-39	1.02e-65	0.491179	0.997	0.991	2.44e-61	1.34e-31	0.490505	0.995	0.991	3.19e-27	1.07e-111	0.464111	1	0.995	2.55e-107	2.2e-163	0.467431	1	0.995	5.26e-159	5.74e-48	0.495971	1	0.988	1.37e-43	1.34e-31	1.32e-162
Radial Glia	1	RPL5	5.16e-52	0.350619	0.997	0.985	1.23e-47	1.17e-86	0.545931	0.999	0.982	2.8e-82	1e-36	0.512067	0.995	0.989	2.39e-32	5.37e-123	0.486415	0.998	0.993	1.28e-118	8.29e-163	0.472157	1	0.994	1.98e-158	6.92e-50	0.476337	1	0.987	1.65e-45	1e-36	4.97e-162
Radial Glia	1	CD99	1.14e-162	0.96621	0.878	0.564	2.72e-158	1.84e-27	0.491232	0.742	0.606	4.38e-23	3.35e-12	0.428535	0.868	0.694	8e-08	8.2e-108	0.808036	0.859	0.528	1.96e-103	2.87e-45	0.364464	0.879	0.694	6.84e-41	6.45e-30	0.562174	0.933	0.699	1.54e-25	3.35e-12	6.83e-162
Radial Glia	1	RPS2	7.62e-48	0.399163	0.997	0.987	1.82e-43	1.36e-66	0.532818	1	0.989	3.25e-62	2.09e-29	0.559223	0.995	0.987	4.98e-25	4.84e-75	0.431154	0.998	0.997	1.16e-70	2.6e-158	0.470362	1	0.998	6.2e-154	1.04e-38	0.488888	1	0.987	2.49e-34	2.09e-29	1.56e-157
Radial Glia	1	RPS27A	3.52e-63	0.407326	0.997	0.98	8.39e-59	8.3e-79	0.508358	0.994	0.98	1.98e-74	1.05e-36	0.567163	1	0.988	2.51e-32	7.07e-78	0.365147	1	0.993	1.69e-73	8.95e-158	0.42566	1	0.994	2.14e-153	1.65e-55	0.51547	0.997	0.983	3.95e-51	1.05e-36	5.37e-157
Radial Glia	1	RPL11	6.5e-40	0.304018	0.996	0.988	1.55e-35	1.05e-63	0.44768	0.999	0.986	2.51e-59	2.26e-34	0.457598	0.995	0.993	5.39e-30	1.01e-103	0.428322	1	0.996	2.4e-99	4.14e-157	0.432388	1	0.997	9.87e-153	5.57e-46	0.42224	1	0.991	1.33e-41	2.26e-34	2.48e-156
Radial Glia	1	RPS19	1.65e-41	0.339968	0.998	0.995	3.94e-37	5.44e-67	0.506119	1	0.994	1.3e-62	3.22e-27	0.51137	0.995	0.99	7.69e-23	1.84e-64	0.368579	1	0.997	4.4e-60	4.68e-155	0.445794	1	0.998	1.12e-150	1.4e-48	0.519477	1	0.985	3.33e-44	3.22e-27	2.81e-154
Radial Glia	1	RPS15A	8.71e-47	0.345743	0.997	0.986	2.08e-42	2.65e-70	0.482985	0.999	0.986	6.33e-66	1.15e-41	0.54393	0.995	0.989	2.74e-37	1.95e-110	0.475336	1	0.991	4.67e-106	3.64e-154	0.452516	1	0.993	8.68e-150	1.03e-51	0.496717	0.997	0.985	2.46e-47	1.15e-41	2.18e-153
Radial Glia	1	RPL7A	7.12e-49	0.372283	0.997	0.975	1.7e-44	4.63e-72	0.510045	0.994	0.982	1.11e-67	6.37e-37	0.534376	1	0.988	1.52e-32	2.35e-123	0.537717	0.998	0.995	5.6e-119	1.2e-153	0.479709	1	0.996	2.86e-149	4.16e-56	0.522695	0.997	0.988	9.93e-52	6.37e-37	7.2e-153
Radial Glia	1	RPS3A	3.98e-37	0.315218	0.999	0.99	9.49e-33	1.06e-63	0.475424	1	0.992	2.52e-59	4.3e-31	0.502517	0.995	0.992	1.03e-26	3.43e-94	0.407957	1	0.996	8.19e-90	2.74e-153	0.420815	1	0.997	6.54e-149	5.38e-46	0.453651	1	0.989	1.28e-41	4.3e-31	1.64e-152
Radial Glia	1	RPL35A	1.32e-39	0.315176	0.993	0.979	3.16e-35	9.24e-54	0.435508	0.99	0.98	2.21e-49	8.93e-35	0.545346	1	0.986	2.13e-30	1.94e-101	0.426819	1	0.992	4.64e-97	1.34e-150	0.434506	1	0.992	3.21e-146	9.24e-46	0.465689	1	0.983	2.2e-41	8.93e-35	8.06e-150
Radial Glia	1	RPL18	3.86e-37	0.312292	0.992	0.975	9.21e-33	2.6e-67	0.485469	0.994	0.975	6.21e-63	3.68e-25	0.388616	0.989	0.986	8.79e-21	2.14e-104	0.450227	1	0.994	5.11e-100	7.44e-150	0.433127	1	0.994	1.78e-145	3.57e-42	0.411249	0.997	0.985	8.52e-38	3.68e-25	4.46e-149
Radial Glia	1	RPL26	9.66e-36	0.315498	0.995	0.979	2.31e-31	1.73e-56	0.443008	0.994	0.98	4.14e-52	1.28e-28	0.469598	0.984	0.986	3.05e-24	4.15e-89	0.433826	0.998	0.99	9.9e-85	8.42e-150	0.457554	0.999	0.992	2.01e-145	2.62e-36	0.442039	0.997	0.981	6.26e-32	1.28e-28	5.05e-149
Radial Glia	1	RPS6	4.83e-43	0.394597	0.995	0.976	1.15e-38	3.66e-72	0.586426	0.999	0.979	8.74e-68	1.19e-33	0.557497	1	0.985	2.84e-29	1.32e-146	0.716838	0.998	0.993	3.16e-142	1.26e-145	0.456558	1	0.997	3.01e-141	7.48e-38	0.47668	0.997	0.98	1.78e-33	1.19e-33	7.94e-146
Radial Glia	1	RPLP0	3.13e-42	0.358108	0.991	0.971	7.47e-38	7.12e-65	0.522843	0.992	0.969	1.7e-60	3.56e-33	0.562907	0.995	0.981	8.51e-29	7.32e-68	0.393086	0.998	0.987	1.75e-63	3.22e-143	0.469455	1	0.987	7.69e-139	1.5e-42	0.477359	0.993	0.976	3.58e-38	3.56e-33	1.93e-142
Radial Glia	1	RPL28	3.11e-53	0.362131	0.992	0.975	7.43e-49	4.77e-59	0.435666	0.99	0.972	1.14e-54	3.48e-31	0.480219	0.995	0.989	8.3e-27	7.35e-85	0.38166	0.998	0.992	1.75e-80	1.29e-140	0.413434	1	0.993	3.08e-136	2.08e-51	0.532571	0.997	0.984	4.97e-47	3.48e-31	7.75e-140
Radial Glia	1	RPS7	2.01e-48	0.337472	0.995	0.979	4.8e-44	1.27e-74	0.504825	0.996	0.975	3.03e-70	2.32e-34	0.52051	0.984	0.985	5.53e-30	7.02e-123	0.529907	1	0.991	1.67e-118	2.89e-140	0.451906	0.998	0.994	6.91e-136	2.41e-52	0.492014	0.997	0.981	5.77e-48	2.32e-34	1.74e-139
Radial Glia	1	RPSA	1.32e-45	0.37839	0.981	0.932	3.15e-41	1.51e-50	0.439342	0.982	0.94	3.59e-46	1.62e-27	0.475485	0.974	0.974	3.86e-23	2.49e-60	0.376089	0.997	0.98	5.93e-56	8.1e-140	0.459581	1	0.983	1.93e-135	5.31e-28	0.377828	0.99	0.961	1.27e-23	1.62e-27	4.86e-139
Radial Glia	1	RPS12	8.49e-50	0.394345	0.994	0.981	2.03e-45	5.57e-75	0.522163	0.996	0.977	1.33e-70	6.63e-34	0.561048	1	0.99	1.58e-29	8.21e-119	0.501597	1	0.99	1.96e-114	2.69e-135	0.434608	1	0.995	6.42e-131	2.2e-46	0.523589	0.993	0.986	5.25e-42	6.63e-34	1.61e-134
Radial Glia	1	RPS3	1.14e-37	0.337376	0.994	0.978	2.72e-33	4.79e-66	0.494383	0.994	0.978	1.14e-61	8.12e-33	0.510806	0.989	0.987	1.94e-28	9.37e-90	0.467508	0.998	0.993	2.24e-85	3.43e-133	0.439702	1	0.995	8.18e-129	1.31e-48	0.469797	0.997	0.985	3.13e-44	8.12e-33	2.06e-132
Radial Glia	1	RPL36	5.68e-35	0.307061	0.993	0.972	1.36e-30	4.47e-64	0.491743	0.992	0.976	1.07e-59	9.17e-24	0.436266	0.995	0.985	2.19e-19	5.96e-83	0.416078	0.998	0.987	1.42e-78	2.25e-131	0.432606	1	0.989	5.38e-127	2.68e-38	0.450551	0.993	0.978	6.4e-34	9.17e-24	1.35e-130
Radial Glia	1	GNB2L1	9.57e-40	0.351884	0.985	0.963	2.28e-35	9.19e-76	0.559803	0.987	0.963	2.19e-71	1.04e-30	0.502869	0.995	0.981	2.49e-26	2.42e-95	0.468024	0.998	0.989	5.77e-91	1.98e-128	0.437862	1	0.989	4.73e-124	1.78e-41	0.452974	0.993	0.977	4.25e-37	1.04e-30	1.19e-127
Radial Glia	1	RPL19	2.7e-43	0.339457	0.994	0.972	6.43e-39	2.78e-67	0.512623	0.992	0.972	6.63e-63	7.17e-34	0.507127	0.995	0.986	1.71e-29	5.51e-81	0.424415	0.998	0.991	1.32e-76	5.29e-128	0.432287	1	0.992	1.26e-123	4.31e-45	0.461848	0.997	0.981	1.03e-40	7.17e-34	3.17e-127
Radial Glia	1	RPL34	3.29e-31	0.270938	0.999	0.986	7.86e-27	6.38e-64	0.444011	0.999	0.987	1.52e-59	4.1e-21	0.427413	1	0.988	9.78e-17	1.17e-86	0.36167	1	0.993	2.78e-82	1.37e-126	0.378284	1	0.993	3.26e-122	8.88e-34	0.406199	1	0.982	2.12e-29	4.1e-21	8.2e-126
Radial Glia	1	RPS9	3.4e-42	0.353741	0.983	0.949	8.13e-38	3.56e-57	0.503087	0.975	0.946	8.5e-53	4.54e-35	0.514335	0.989	0.98	1.08e-30	1.12e-75	0.405175	0.998	0.986	2.68e-71	1.46e-125	0.388512	1	0.99	3.48e-121	1.52e-31	0.412372	0.987	0.972	3.62e-27	1.52e-31	8.75e-125
Radial Glia	1	ATP5G2	5.17e-51	0.369731	0.969	0.917	1.23e-46	6.09e-52	0.447488	0.943	0.906	1.45e-47	8.74e-16	0.312958	0.974	0.962	2.09e-11	3.13e-102	0.529898	0.998	0.965	7.48e-98	9.15e-125	0.483359	0.998	0.969	2.18e-120	8.81e-20	0.331494	0.993	0.958	2.1e-15	8.74e-16	5.49e-124
Radial Glia	1	RPS23	1.04e-38	0.32061	0.998	0.989	2.47e-34	3.42e-73	0.483391	0.996	0.99	8.16e-69	1.72e-33	0.521125	0.995	0.991	4.11e-29	7.73e-74	0.359869	1	0.996	1.84e-69	1.54e-123	0.376957	1	0.996	3.67e-119	4.16e-47	0.484631	0.997	0.986	9.94e-43	1.72e-33	9.23e-123
Radial Glia	1	RPLP1	1.2e-39	0.337173	0.999	0.989	2.87e-35	6.8e-63	0.488184	0.999	0.988	1.62e-58	7.76e-34	0.579075	0.995	0.992	1.85e-29	3.46e-70	0.351647	1	0.996	8.25e-66	1.59e-123	0.370037	1	0.997	3.79e-119	1.87e-50	0.555448	0.997	0.989	4.47e-46	7.76e-34	9.53e-123
Radial Glia	1	RPS15	1.57e-33	0.304222	0.996	0.98	3.76e-29	5.42e-51	0.438154	0.993	0.981	1.29e-46	9.96e-32	0.498374	0.995	0.991	2.38e-27	2.28e-79	0.418267	1	0.994	5.43e-75	2.56e-123	0.39414	1	0.995	6.1e-119	9.65e-53	0.496754	0.997	0.984	2.3e-48	9.96e-32	1.53e-122
Radial Glia	1	RPL7	2.29e-33	0.294443	0.991	0.967	5.47e-29	5.45e-66	0.477442	0.992	0.968	1.3e-61	1.67e-17	0.430892	0.968	0.966	3.98e-13	8.85e-74	0.447887	0.997	0.983	2.11e-69	2.09e-122	0.47616	1	0.988	5e-118	5.54e-22	0.354302	0.997	0.966	1.32e-17	1.67e-17	1.26e-121
Radial Glia	1	RPL39	4.1e-27	0.273208	0.995	0.983	9.78e-23	1.4e-59	0.463625	0.997	0.986	3.35e-55	7.77e-33	0.487176	1	0.992	1.85e-28	4.92e-74	0.391765	0.998	0.99	1.17e-69	2.23e-120	0.391188	1	0.99	5.32e-116	1.12e-46	0.468089	0.997	0.986	2.67e-42	4.1e-27	1.34e-119
Radial Glia	1	RPS28	1.64e-57	0.387193	0.991	0.978	3.93e-53	3.49e-74	0.497442	0.996	0.972	8.33e-70	6.88e-24	0.421411	0.989	0.985	1.64e-19	3.69e-70	0.358023	1	0.988	8.81e-66	9.08e-120	0.397222	1	0.986	2.17e-115	1.2e-49	0.503692	0.997	0.977	2.85e-45	6.88e-24	5.45e-119
Radial Glia	1	RPL30	1.35e-38	0.308846	0.995	0.984	3.23e-34	7.35e-59	0.432426	0.997	0.98	1.76e-54	1.18e-34	0.498458	0.995	0.988	2.81e-30	1.63e-60	0.320908	0.998	0.991	3.89e-56	5.57e-119	0.362655	1	0.993	1.33e-114	1.87e-47	0.459506	0.993	0.984	4.46e-43	1.18e-34	3.34e-118
Radial Glia	1	RPS4X	1.51e-41	0.373085	0.99	0.967	3.6e-37	2.38e-64	0.533452	0.989	0.966	5.69e-60	3.28e-24	0.474968	0.989	0.987	7.84e-20	5.3e-100	0.470228	0.998	0.99	1.27e-95	2.01e-116	0.420604	1	0.991	4.8e-112	4.93e-40	0.480165	0.997	0.979	1.18e-35	3.28e-24	1.21e-115
Radial Glia	1	TTYH1	8.65e-116	0.846333	0.88	0.604	2.07e-111	6.98e-16	0.312018	0.748	0.605	1.67e-11	8.13e-13	0.45774	0.905	0.729	1.94e-08	7.93e-74	0.635733	0.973	0.708	1.89e-69	1.73e-39	0.374869	0.956	0.765	4.13e-35	2.67e-43	0.823127	0.963	0.73	6.38e-39	8.13e-13	5.19e-115
Radial Glia	1	NACA	3.3e-51	0.320691	0.997	0.976	7.87e-47	2.42e-70	0.44958	0.987	0.975	5.79e-66	5.45e-31	0.444489	0.984	0.984	1.3e-26	4.23e-85	0.381566	1	0.991	1.01e-80	7.44e-114	0.36082	1	0.991	1.78e-109	1.24e-38	0.406552	1	0.98	2.95e-34	5.45e-31	4.46e-113
Radial Glia	1	RPL37	5.31e-38	0.297359	0.998	0.988	1.27e-33	1.26e-71	0.467968	1	0.988	3e-67	1.26e-28	0.465738	0.995	0.991	3.01e-24	2.7e-61	0.326098	1	0.992	6.45e-57	3.57e-111	0.352915	1	0.994	8.52e-107	1.16e-29	0.374127	1	0.987	2.77e-25	1.26e-28	2.14e-110
Radial Glia	1	RPS13	3.93e-30	0.261768	0.995	0.972	9.38e-26	1.46e-65	0.443638	0.99	0.977	3.49e-61	1.74e-27	0.417049	1	0.983	4.15e-23	3.44e-48	0.292323	0.998	0.989	8.2e-44	3.74e-111	0.355105	1	0.988	8.93e-107	1.57e-29	0.369776	0.993	0.978	3.74e-25	1.74e-27	2.24e-110
Radial Glia	1	EEF1A1	1.43e-53	0.327691	1	0.999	3.41e-49	8.79e-75	0.44588	1	0.998	2.1e-70	1.46e-27	0.454558	1	0.996	3.49e-23	2.12e-56	0.2813	1	0.999	5.07e-52	2.31e-102	0.329037	1	0.999	5.51e-98	4.49e-41	0.432935	1	0.997	1.07e-36	1.46e-27	1.38e-101
Radial Glia	1	RPS27	4.12e-45	0.335691	1	0.994	9.83e-41	1.45e-81	0.517088	1	0.994	3.45e-77	1.17e-28	0.498991	1	0.992	2.79e-24	1.02e-40	0.268493	0.998	0.993	2.42e-36	9.31e-100	0.337575	1	0.996	2.22e-95	1.31e-28	0.378517	1	0.988	3.13e-24	1.31e-28	5.58e-99
Radial Glia	1	RPS29	5.05e-42	0.316038	0.996	0.977	1.21e-37	1.47e-71	0.482332	0.997	0.978	3.5e-67	1.13e-21	0.414589	0.974	0.98	2.7e-17	1.29e-37	0.286462	1	0.982	3.07e-33	2.45e-97	0.393052	0.999	0.98	5.85e-93	3.61e-21	0.360888	0.99	0.973	8.62e-17	3.61e-21	1.47e-96
Radial Glia	1	RPL41	7.34e-51	0.35414	0.998	0.996	1.75e-46	6.99e-74	0.501496	0.999	0.994	1.67e-69	5.07e-34	0.563308	1	0.997	1.21e-29	5.99e-97	0.479719	0.998	0.997	1.43e-92	1.26e-94	0.361261	1	0.998	3.01e-90	1.17e-61	0.564575	1	0.993	2.8e-57	5.07e-34	3.59e-96
Radial Glia	1	RPL9	2.42e-27	0.253	0.995	0.978	5.78e-23	9.01e-61	0.46257	0.994	0.976	2.15e-56	3.63e-16	0.364999	0.989	0.982	8.66e-12	3.02e-39	0.288229	0.995	0.989	7.22e-35	2.72e-96	0.383813	1	0.992	6.48e-92	5.89e-17	0.300435	0.997	0.979	1.41e-12	3.63e-16	1.63e-95
Radial Glia	1	RPL31	2.18e-32	0.298626	0.984	0.954	5.19e-28	2.88e-56	0.478084	0.987	0.96	6.87e-52	6.84e-15	0.385685	0.958	0.96	1.63e-10	4.39e-40	0.354437	0.994	0.969	1.05e-35	5.26e-94	0.491232	1	0.975	1.26e-89	1.02e-15	0.325134	0.987	0.949	2.42e-11	6.84e-15	3.15e-93
Radial Glia	1	RPL23	1.3e-48	0.390856	0.992	0.971	3.09e-44	2.52e-80	0.541117	0.996	0.973	6.02e-76	3.26e-12	0.395149	0.979	0.967	7.77e-08	6.33e-40	0.374677	0.998	0.98	1.51e-35	7.63e-93	0.504925	0.999	0.987	1.82e-88	2.69e-10	0.316856	0.977	0.964	6.41e-06	2.69e-10	4.58e-92
Radial Glia	1	RPS10	6.65e-45	0.381636	0.976	0.925	1.59e-40	1.61e-47	0.47716	0.952	0.913	3.85e-43	1.03e-28	0.504976	0.968	0.969	2.47e-24	1.37e-51	0.397275	0.984	0.917	3.26e-47	6.21e-92	0.430092	0.997	0.939	1.48e-87	1.34e-39	0.474186	0.987	0.963	3.21e-35	1.03e-28	3.72e-91
Radial Glia	1	RPL35	9.03e-38	0.330047	0.99	0.963	2.16e-33	5.95e-61	0.464531	0.993	0.97	1.42e-56	1.03e-22	0.418825	0.989	0.981	2.45e-18	4.38e-54	0.342079	0.998	0.988	1.05e-49	7.02e-92	0.364751	1	0.989	1.68e-87	1.44e-25	0.342397	0.993	0.973	3.44e-21	1.03e-22	4.21e-91
Radial Glia	1	RPL10	3.11e-37	0.317679	0.996	0.988	7.43e-33	3.23e-59	0.437853	1	0.988	7.72e-55	1.02e-17	0.321482	0.995	0.993	2.44e-13	1.57e-45	0.274997	0.998	0.997	3.75e-41	4.34e-91	0.317778	1	0.997	1.04e-86	1.47e-25	0.330661	1	0.991	3.5e-21	1.02e-17	2.61e-90
Radial Glia	1	RPL37A	1.63e-29	0.253887	1	0.994	3.89e-25	4.33e-63	0.421586	1	0.992	1.03e-58	2.56e-20	0.409529	0.995	0.989	6.12e-16	4.42e-45	0.322412	0.998	0.993	1.06e-40	4.36e-89	0.396109	1	0.994	1.04e-84	1.51e-12	0.270837	1	0.986	3.6e-08	1.51e-12	2.62e-88
Radial Glia	1	RPS5	1.39e-32	0.31553	0.978	0.951	3.31e-28	1.22e-58	0.486843	0.986	0.956	2.91e-54	3.37e-23	0.434304	0.995	0.978	8.05e-19	2.49e-60	0.380406	0.995	0.987	5.94e-56	7.45e-89	0.36495	1	0.987	1.78e-84	4.1e-36	0.427691	0.997	0.974	9.78e-32	3.37e-23	4.47e-88
Radial Glia	1	RPL8	2.3e-30	0.290923	0.986	0.969	5.49e-26	9.07e-43	0.395414	0.989	0.967	2.16e-38	1.13e-31	0.499062	1	0.988	2.71e-27	9.27e-62	0.405167	0.998	0.993	2.21e-57	2.03e-87	0.384248	1	0.993	4.85e-83	1.96e-45	0.477108	1	0.984	4.67e-41	2.3e-30	1.22e-86
Radial Glia	1	SOX2	2.26e-87	0.747199	0.858	0.573	5.39e-83	2.93e-30	0.496556	0.793	0.595	6.99e-26	1.02e-18	0.706101	0.868	0.633	2.43e-14	7.48e-85	0.736474	0.962	0.677	1.79e-80	4.66e-68	0.491996	0.971	0.762	1.11e-63	3.15e-14	0.378181	0.886	0.647	7.53e-10	3.15e-14	1.35e-86
Radial Glia	1	RFX4	1.15e-84	0.59049	0.736	0.422	2.75e-80	1.85e-45	0.54834	0.685	0.432	4.43e-41	2.19e-12	0.46406	0.763	0.539	5.23e-08	1.06e-54	0.509278	0.757	0.466	2.53e-50	3.75e-36	0.343597	0.773	0.563	8.95e-32	4.89e-28	0.637119	0.785	0.519	1.17e-23	2.19e-12	6.92e-84
Radial Glia	1	NPM1	2.22e-22	0.274323	0.967	0.933	5.3e-18	3.8e-27	0.321932	0.969	0.928	9.07e-23	8.67e-18	0.363575	0.989	0.977	2.07e-13	3.69e-42	0.325191	0.995	0.972	8.8e-38	1.16e-82	0.372055	0.999	0.982	2.78e-78	1.14e-32	0.410543	0.993	0.971	2.71e-28	8.67e-18	6.99e-82
Radial Glia	1	RPL27	2.86e-30	0.27983	0.975	0.939	6.82e-26	1.35e-50	0.451811	0.975	0.942	3.22e-46	1.25e-14	0.421858	0.963	0.967	2.98e-10	2.36e-42	0.315526	0.995	0.97	5.63e-38	4.99e-81	0.374057	1	0.977	1.19e-76	1.41e-17	0.31566	0.987	0.948	3.36e-13	1.25e-14	2.99e-80
Radial Glia	1	IRX2	1.8e-36	0.422681	0.562	0.368	4.3e-32	1.45e-27	0.433033	0.499	0.319	3.46e-23	4.39e-05	0.328438	0.274	0.174	1	7.93e-81	0.654746	0.713	0.388	1.89e-76	3.64e-51	0.431125	0.716	0.475	8.68e-47	2.44e-05	0.253885	0.218	0.143	0.582716	4.39e-05	4.76e-80
Radial Glia	1	EIF3E	4.47e-33	0.302553	0.948	0.876	1.07e-28	3.99e-34	0.396379	0.919	0.875	9.53e-30	6.66e-12	0.364495	0.937	0.929	1.59e-07	5.93e-36	0.330319	0.986	0.924	1.42e-31	2.39e-72	0.378285	0.994	0.941	5.71e-68	4.31e-27	0.43439	0.963	0.917	1.03e-22	6.66e-12	1.43e-71
Radial Glia	1	RPL36A	1.23e-29	0.293867	0.978	0.932	2.94e-25	3.11e-53	0.484061	0.961	0.923	7.42e-49	8.87e-17	0.426347	0.963	0.957	2.12e-12	3.87e-26	0.308455	0.939	0.842	9.23e-22	3.44e-65	0.386721	0.973	0.887	8.21e-61	6.31e-21	0.399621	0.987	0.949	1.51e-16	8.87e-17	2.06e-64
Radial Glia	1	EEF1D	2.61e-29	0.312864	0.909	0.827	6.22e-25	7.93e-38	0.465076	0.912	0.818	1.89e-33	1.05e-23	0.585756	0.958	0.912	2.51e-19	2.08e-23	0.302244	0.986	0.899	4.96e-19	1.6e-58	0.40307	0.988	0.894	3.82e-54	7.17e-23	0.415229	0.953	0.881	1.71e-18	7.17e-23	9.61e-58
Radial Glia	1	TSHZ2	6.51e-30	0.286026	0.622	0.436	1.55e-25	2.88e-41	0.573946	0.602	0.374	6.87e-37	3.52e-07	0.485093	0.716	0.602	0.00839806	6.57e-57	0.526318	0.684	0.407	1.57e-52	5.59e-39	0.386857	0.699	0.499	1.34e-34	3.78e-12	0.375919	0.718	0.552	9.02e-08	3.52e-07	3.94e-56
Radial Glia	1	TMEM47	2.64e-49	0.414646	0.56	0.33	6.31e-45	4.39e-39	0.496623	0.457	0.244	1.05e-34	1.91e-08	0.33423	0.632	0.475	0.000455984	3.27e-41	0.424619	0.62	0.39	7.8e-37	1.31e-51	0.418516	0.857	0.639	3.13e-47	2.5e-08	0.283162	0.574	0.453	0.000596136	2.5e-08	7.86e-51
Radial Glia	1	PRDX6	4.65e-25	0.309905	0.853	0.714	1.11e-20	2.28e-16	0.333202	0.784	0.684	5.45e-12	5.23e-13	0.448381	0.926	0.82	1.25e-08	2.12e-50	0.470453	0.964	0.822	5.06e-46	3.35e-45	0.335724	0.98	0.885	7.99e-41	1.31e-29	0.54474	0.963	0.8	3.12e-25	5.23e-13	1.27e-49
Radial Glia	1	CMBL	4.22e-44	0.36923	0.583	0.366	1.01e-39	9.02e-24	0.40964	0.573	0.406	2.15e-19	4.63e-15	0.461817	0.647	0.429	1.1e-10	1.14e-37	0.377789	0.667	0.435	2.72e-33	3.43e-39	0.319836	0.749	0.538	8.19e-35	3.58e-17	0.42599	0.587	0.404	8.55e-13	4.63e-15	2.53e-43
Radial Glia	1	CLNS1A	1.02e-27	0.276287	0.691	0.531	2.42e-23	2.07e-11	0.260145	0.604	0.502	4.93e-07	9.17e-09	0.337123	0.821	0.755	0.000218849	4.69e-35	0.360407	0.859	0.683	1.12e-30	1.78e-27	0.259838	0.858	0.708	4.26e-23	4.11e-11	0.325635	0.812	0.715	9.8e-07	9.17e-09	2.82e-34
Radial Glia	1	EIF3F	7.12e-24	0.262187	0.91	0.845	1.7e-19	1.19e-21	0.330774	0.887	0.817	2.85e-17	5.1e-14	0.396398	0.921	0.919	1.22e-09	5.1e-30	0.301401	0.981	0.911	1.22e-25	1.3e-30	0.254426	0.984	0.921	3.1e-26	5.76e-16	0.305962	0.956	0.898	1.37e-11	5.1e-14	7.78e-30
Neurons	2	STMN2	1.64e-229	2.27907	0.96	0.373	3.93e-225	8.16e-219	2.14672	0.971	0.363	1.95e-214	7.42e-227	1.76036	0.989	0.453	1.77e-222	1.44e-270	2.11046	0.962	0.345	3.43e-266	2.62e-281	2.44549	0.952	0.265	6.25e-277	0	1.83283	0.993	0.475	0	8.16e-219	0
Neurons	2	CRABP1	5.83e-144	1.7417	0.956	0.596	1.39e-139	2.53e-155	2.41273	0.96	0.729	6.04e-151	1.02e-232	2.07077	0.992	0.652	2.43e-228	5.16e-211	2.15392	0.993	0.816	1.23e-206	7.83e-157	2.04945	0.983	0.787	1.87e-152	0	1.8824	0.987	0.671	0	5.83e-144	0
Neurons	2	GNG3	1.17e-128	1.51258	0.696	0.25	2.8e-124	1.48e-82	1.32487	0.607	0.257	3.53e-78	2.18e-228	1.62274	0.921	0.407	5.2e-224	1.9e-216	1.7908	0.831	0.312	4.53e-212	4.62e-175	1.74867	0.756	0.247	1.1e-170	0	1.60302	0.884	0.352	0	1.48e-82	0
Neurons	2	TUBA1A	6.5e-75	0.979876	0.983	0.947	1.55e-70	2.09e-115	1.3352	0.992	0.956	5e-111	1.37e-207	1.10499	1	0.997	3.28e-203	9.93e-221	1.42692	1	0.996	2.37e-216	4.28e-178	1.43757	0.998	0.994	1.02e-173	0	1.07032	1	0.997	0	6.5e-75	0
Neurons	2	BASP1	1.24e-35	0.774902	0.807	0.734	2.95e-31	1.87e-57	1.044	0.867	0.749	4.45e-53	2e-188	1.39068	0.972	0.922	4.77e-184	2.56e-175	1.34284	0.972	0.917	6.12e-171	7.53e-143	1.54144	0.957	0.897	1.8e-138	0	1.491	0.989	0.921	0	1.24e-35	0
Neurons	2	INA	8.16e-80	0.916523	0.614	0.23	1.95e-75	6.11e-52	0.797162	0.497	0.2	1.46e-47	3.33e-201	1.38856	0.928	0.362	7.95e-197	1.33e-189	1.43346	0.854	0.328	3.16e-185	8.32e-127	1.38192	0.764	0.317	1.99e-122	1.88e-306	1.42523	0.904	0.343	4.48e-302	6.11e-52	1.13e-305
Neurons	2	TUBB2B	1.02e-101	1.0262	0.956	0.922	2.43e-97	9.1e-119	1.18913	0.983	0.913	2.17e-114	7.44e-204	1.22662	0.995	0.965	1.78e-199	1.42e-203	1.35552	0.997	0.958	3.39e-199	6.29e-161	1.37391	0.99	0.975	1.5e-156	6.15e-295	1.15932	0.995	0.969	1.47e-290	1.02e-101	3.69e-294
Neurons	2	RTN1	1.16e-75	1.03078	0.526	0.193	2.77e-71	1.18e-69	1.04098	0.582	0.246	2.81e-65	1.9e-207	1.63463	0.958	0.579	4.55e-203	1.27e-203	1.86623	0.857	0.373	3.03e-199	2.19e-143	1.68818	0.775	0.317	5.23e-139	4.28e-288	1.6107	0.936	0.57	1.02e-283	1.18e-69	2.57e-287
Neurons	2	MLLT11	1.02e-76	1.20158	0.824	0.583	2.43e-72	6.65e-69	1.24988	0.794	0.577	1.59e-64	7.38e-188	1.44021	0.978	0.891	1.76e-183	5.81e-195	1.61963	0.965	0.691	1.39e-190	2.95e-130	1.56955	0.897	0.608	7.05e-126	4.73e-279	1.37683	0.989	0.887	1.13e-274	6.65e-69	2.84e-278
Neurons	2	NRN1	3.18e-18	0.589367	0.189	0.078	7.6e-14	2.2e-45	0.930093	0.347	0.123	5.25e-41	9.66e-158	1.05712	0.606	0.166	2.31e-153	4.29e-96	1.10899	0.526	0.184	1.03e-91	4.31e-90	1.27086	0.436	0.121	1.03e-85	1.61e-264	1.33846	0.618	0.159	3.85e-260	3.18e-18	9.67e-264
Neurons	2	TTC9B	7.56e-62	0.620737	0.333	0.093	1.8e-57	7.81e-45	0.792413	0.285	0.088	1.86e-40	9.95e-186	1.01479	0.651	0.166	2.38e-181	4.55e-199	1.26745	0.623	0.151	1.09e-194	3.29e-135	1.00491	0.45	0.091	7.85e-131	1.15e-253	0.976617	0.566	0.135	2.74e-249	7.81e-45	6.9e-253
Neurons	2	TMSB10	2.26e-113	1.22017	0.981	0.931	5.39e-109	1.84e-128	1.44808	0.983	0.922	4.4e-124	3.23e-171	0.919618	0.998	0.993	7.7e-167	2e-198	1.29645	1	0.987	4.78e-194	1.12e-156	1.27731	0.996	0.989	2.68e-152	6.02e-248	0.860488	0.999	0.99	1.44e-243	2.26e-113	3.61e-247
Neurons	2	RAB3A	9.96e-70	0.930479	0.491	0.19	2.38e-65	6.25e-29	0.697197	0.389	0.2	1.49e-24	1.99e-153	0.95152	0.724	0.268	4.75e-149	3.44e-112	0.974432	0.507	0.164	8.2e-108	2.19e-54	0.643207	0.364	0.125	5.23e-50	1.19e-243	1.02943	0.665	0.21	2.85e-239	6.25e-29	7.16e-243
Neurons	2	SEZ6L2	3.08e-81	0.9675	0.658	0.274	7.35e-77	2.79e-35	0.778285	0.53	0.291	6.66e-31	6.42e-147	1.14535	0.863	0.464	1.53e-142	5.96e-55	0.704763	0.709	0.484	1.42e-50	1.66e-27	0.751871	0.607	0.451	3.95e-23	2.81e-238	1.22029	0.882	0.445	6.72e-234	1.66e-27	1.69e-237
Neurons	2	GDAP1L1	1.58e-117	1.29233	0.73	0.322	3.76e-113	9.76e-89	1.28217	0.665	0.312	2.33e-84	3.27e-164	1.11979	0.841	0.385	7.8e-160	3.66e-92	1.03208	0.697	0.387	8.73e-88	9.22e-63	1.12601	0.665	0.406	2.2e-58	5.69e-236	1.15821	0.791	0.334	1.36e-231	9.22e-63	3.41e-235
Neurons	2	CCNI	1.12e-105	1.16729	0.943	0.894	2.68e-101	8.58e-79	1.0537	0.931	0.89	2.05e-74	5.04e-130	0.821744	0.941	0.956	1.2e-125	2.74e-151	1.05688	0.965	0.958	6.55e-147	4.62e-95	0.923586	0.94	0.95	1.1e-90	1.1e-234	0.911264	0.972	0.955	2.62e-230	8.58e-79	6.6e-234
Neurons	2	STMN4	8.45e-99	1.50479	0.738	0.363	2.02e-94	1.04e-65	1.36332	0.667	0.363	2.47e-61	2.46e-177	1.39457	0.91	0.421	5.86e-173	8.93e-154	1.40026	0.812	0.345	2.13e-149	5.55e-149	1.72686	0.781	0.3	1.32e-144	1.76e-223	1.3389	0.85	0.404	4.2e-219	1.04e-65	1.06e-222
Neurons	2	SCG3	7.02e-59	0.682769	0.539	0.208	1.68e-54	4.66e-52	0.819233	0.48	0.188	1.11e-47	1.4e-166	1.1202	0.875	0.361	3.33e-162	2.09e-140	1.1435	0.765	0.307	4.99e-136	1.41e-105	1.14431	0.707	0.277	3.37e-101	1.04e-222	1.06678	0.807	0.317	2.49e-218	4.66e-52	6.26e-222
Neurons	2	FAM57B	7.69e-90	1.13059	0.553	0.198	1.84e-85	1.89e-59	0.936708	0.478	0.195	4.52e-55	1.92e-156	0.983054	0.738	0.27	4.59e-152	1.08e-98	1.0095	0.556	0.218	2.59e-94	1.22e-94	1.14746	0.529	0.177	2.9e-90	7.23e-213	1.02497	0.714	0.271	1.73e-208	1.89e-59	4.34e-212
Neurons	2	DNER	8.06e-44	0.596415	0.424	0.176	1.92e-39	1.84e-15	0.484295	0.38	0.236	4.4e-11	5.98e-140	1.20329	0.88	0.588	1.43e-135	2.24e-66	0.808668	0.515	0.224	5.35e-62	4.18e-59	0.910208	0.488	0.2	9.98e-55	1.3e-212	1.27197	0.898	0.622	3.1e-208	1.84e-15	7.79e-212
Neurons	2	TUBB2A	3.14e-54	0.982464	0.784	0.614	7.5e-50	2.62e-56	1.11087	0.771	0.591	6.27e-52	4.45e-133	1.02315	0.955	0.891	1.06e-128	1.35e-169	1.59594	0.941	0.78	3.23e-165	2.53e-115	1.50886	0.909	0.784	6.04e-111	3.18e-212	1.13527	0.954	0.886	7.58e-208	3.14e-54	1.91e-211
Neurons	2	STMN1	2.63e-36	0.740252	0.91	0.823	6.28e-32	3.04e-51	0.864371	0.936	0.862	7.26e-47	2.73e-155	1.0092	0.998	0.985	6.52e-151	6.56e-178	1.20042	0.997	0.977	1.57e-173	3.74e-139	1.27754	0.983	0.97	8.94e-135	3.43e-211	0.971319	0.997	0.982	8.19e-207	2.63e-36	2.06e-210
Neurons	2	NSG2	5.67e-48	0.655151	0.382	0.138	1.35e-43	2.94e-42	0.738074	0.337	0.119	7.02e-38	3.89e-186	1.10954	0.805	0.25	9.29e-182	3.19e-121	0.8717	0.558	0.166	7.61e-117	6.64e-79	0.75565	0.401	0.108	1.58e-74	9.97e-210	0.914747	0.723	0.236	2.38e-205	2.94e-42	5.98e-209
Neurons	2	DCX	5.44e-94	1.12559	0.793	0.381	1.3e-89	5e-45	0.865535	0.655	0.386	1.19e-40	1.41e-158	1.07734	0.891	0.373	3.36e-154	2.01e-117	1.12909	0.788	0.378	4.81e-113	4.61e-140	1.43256	0.831	0.339	1.1e-135	2.67e-205	1.03675	0.865	0.388	6.39e-201	5e-45	1.6e-204
Neurons	2	CRMP1	1.57e-21	0.635137	0.65	0.529	3.74e-17	7.03e-26	0.810447	0.634	0.48	1.68e-21	1.97e-135	1.08788	0.927	0.648	4.71e-131	1.44e-113	1.20727	0.872	0.68	3.44e-109	1.97e-77	1.2564	0.816	0.623	4.71e-73	4.3e-204	1.13181	0.929	0.663	1.03e-199	1.57e-21	2.58e-203
Neurons	2	SOX4	2.86e-17	0.388574	0.87	0.885	6.84e-13	2.79e-34	0.565956	0.896	0.874	6.67e-30	6.88e-148	1.19644	0.989	0.951	1.64e-143	6.17e-116	1.16158	0.949	0.921	1.47e-111	9.1e-90	1.09369	0.938	0.884	2.17e-85	1.17e-203	1.07106	0.989	0.945	2.78e-199	2.86e-17	6.99e-203
Neurons	2	NREP	2.37e-15	0.646933	0.73	0.677	5.66e-11	2.08e-21	0.760328	0.688	0.6	4.96e-17	7.56e-148	1.01271	0.95	0.896	1.8e-143	3.24e-130	1.17355	0.924	0.833	7.73e-126	2.79e-41	0.895535	0.802	0.779	6.67e-37	2.7e-200	1.01245	0.951	0.887	6.44e-196	2.37e-15	1.62e-199
Neurons	2	RP4-665J23,1	0.0707846	0.369568	0.22	0.198	1	2.15e-15	0.882909	0.407	0.286	5.13e-11	6.01e-199	1.34547	0.829	0.307	1.44e-194	3.44e-06	0.426695	0.349	0.291	0.082141	7.05e-06	0.456275	0.271	0.2	0.168413	6.4e-182	1.14282	0.827	0.473	1.53e-177	0.0707846	3.61e-198
Neurons	2	POU2F2	1.83e-35	0.477511	0.465	0.219	4.38e-31	1.9e-13	0.320812	0.353	0.215	4.55e-09	9.45e-129	0.902833	0.692	0.252	2.26e-124	3.54e-66	0.805379	0.447	0.179	8.46e-62	2.46e-54	0.786219	0.457	0.189	5.86e-50	5.11e-198	1.07667	0.73	0.281	1.22e-193	1.9e-13	3.07e-197
Neurons	2	NSG1	1.71e-41	0.838081	0.495	0.26	4.09e-37	5.39e-17	0.631834	0.391	0.251	1.29e-12	1.93e-137	1.15687	0.844	0.451	4.6e-133	2.25e-148	1.33634	0.743	0.317	5.36e-144	4.35e-122	1.27573	0.653	0.226	1.04e-117	4.09e-197	1.16243	0.806	0.413	9.76e-193	5.39e-17	2.45e-196
Neurons	2	PCSK1N	2.03e-92	1.24949	0.669	0.296	4.84e-88	1.51e-75	1.31022	0.636	0.307	3.61e-71	3.1e-114	0.995421	0.931	0.757	7.39e-110	1.49e-191	1.63022	0.842	0.346	3.56e-187	1.32e-122	1.61247	0.795	0.382	3.14e-118	5.9e-182	1.12262	0.916	0.69	1.41e-177	1.51e-75	8.96e-191
Neurons	2	HN1	1.54e-52	0.852404	0.855	0.78	3.66e-48	4e-27	0.718019	0.809	0.765	9.55e-23	1.78e-137	0.925571	0.967	0.94	4.25e-133	1.93e-130	1.03258	0.967	0.943	4.6e-126	2.31e-99	1.05098	0.948	0.921	5.52e-95	1.39e-189	0.895235	0.975	0.929	3.31e-185	4e-27	8.32e-189
Neurons	2	TERF2IP	6.99e-48	0.808296	0.816	0.733	1.67e-43	7.56e-25	0.775975	0.744	0.703	1.81e-20	5.22e-142	1.03964	0.939	0.884	1.25e-137	1.26e-116	1.06945	0.91	0.81	3e-112	9.05e-68	1.09501	0.845	0.762	2.16e-63	1.02e-185	0.988412	0.933	0.828	2.43e-181	7.56e-25	6.11e-185
Neurons	2	TUBB	6.01e-55	0.753149	0.945	0.904	1.43e-50	5.88e-69	0.884694	0.956	0.904	1.4e-64	1.31e-129	0.823216	0.994	0.982	3.14e-125	5.73e-123	0.898474	0.99	0.978	1.37e-118	4.95e-92	0.884489	0.979	0.975	1.18e-87	4.14e-185	0.773904	0.999	0.983	9.88e-181	6.01e-55	2.48e-184
Neurons	2	NEFM	2.15e-79	1.27963	0.591	0.239	5.12e-75	1.7e-55	1.11326	0.559	0.261	4.07e-51	1.14e-93	1.09933	0.668	0.314	2.72e-89	5.45e-169	2.01076	0.748	0.278	1.3e-164	6.34e-133	1.69214	0.7	0.25	1.51e-128	1.81e-183	1.30106	0.708	0.305	4.31e-179	1.7e-55	1.08e-182
Neurons	2	MAPT	1.86e-45	0.605924	0.459	0.2	4.45e-41	1.12e-19	0.471044	0.389	0.224	2.68e-15	1.72e-139	0.990117	0.727	0.282	4.11e-135	3.46e-125	0.999207	0.612	0.211	8.25e-121	2.87e-72	0.898584	0.475	0.167	6.86e-68	7.95e-181	0.922062	0.668	0.258	1.9e-176	1.12e-19	4.77e-180
Neurons	2	GAP43	2.58e-49	0.832991	0.461	0.187	6.15e-45	3.73e-63	1.06035	0.549	0.228	8.9e-59	3e-35	0.59156	0.81	0.645	7.15e-31	2.51e-176	1.59228	0.86	0.376	6e-172	1.69e-138	1.80058	0.814	0.368	4.02e-134	2.19e-32	0.423792	0.828	0.673	5.24e-28	2.19e-32	1.51e-175
Neurons	2	KIF5C	1.11e-44	0.863553	0.723	0.498	2.65e-40	1.94e-26	0.860312	0.617	0.449	4.62e-22	1.56e-114	1.0095	0.927	0.765	3.73e-110	9.57e-122	1.24881	0.842	0.561	2.29e-117	5.51e-81	1.27013	0.783	0.516	1.32e-76	2.28e-171	1.00603	0.905	0.693	5.45e-167	1.94e-26	1.37e-170
Neurons	2	2022-09-06	2.15e-14	0.474656	0.482	0.359	5.14e-10	1.45e-09	0.593184	0.451	0.376	3.47e-05	8.42e-135	1.08916	0.844	0.506	2.01e-130	4.17e-36	0.648841	0.567	0.392	9.94e-32	4.83e-12	0.603878	0.467	0.372	1.15e-07	1.29e-168	1.04468	0.816	0.503	3.09e-164	1.45e-09	7.77e-168
Neurons	2	CDKN1C	3.73e-21	0.469962	0.717	0.596	8.92e-17	8.09e-09	0.366177	0.611	0.555	0.000193066	1.24e-80	0.881289	0.869	0.696	2.95e-76	2.22e-35	0.606084	0.74	0.603	5.3e-31	1.49e-58	0.993474	0.771	0.544	3.55e-54	8.54e-167	1.2001	0.875	0.634	2.04e-162	8.09e-09	5.12e-166
Neurons	2	ENO2	2.02e-35	0.811273	0.692	0.543	4.82e-31	2.26e-24	0.873448	0.632	0.525	5.4e-20	2.25e-116	1.15328	0.86	0.621	5.38e-112	2.31e-75	1.08257	0.714	0.469	5.51e-71	2.87e-57	1.19107	0.671	0.446	6.85e-53	1.2e-166	1.22585	0.861	0.639	2.87e-162	2.26e-24	7.22e-166
Neurons	2	MAP1B	1.12e-23	0.496265	0.866	0.861	2.68e-19	9.54e-37	0.721594	0.906	0.85	2.28e-32	6.52e-134	0.897843	0.991	0.946	1.56e-129	2.54e-119	1.00187	0.965	0.912	6.05e-115	2.8e-98	1.00678	0.965	0.939	6.68e-94	6.2e-165	0.763354	0.986	0.946	1.48e-160	1.12e-23	3.72e-164
Neurons	2	UCHL1	1.09e-28	0.79346	0.61	0.431	2.61e-24	3.02e-28	0.859749	0.676	0.537	7.2e-24	1.84e-142	1.33832	0.928	0.794	4.39e-138	7.98e-162	1.55393	0.921	0.709	1.91e-157	9.77e-98	1.50205	0.845	0.611	2.33e-93	4.18e-160	1.17378	0.906	0.765	9.99e-156	3.02e-28	4.79e-161
Neurons	2	H3F3A	3.34e-47	0.623916	0.985	0.962	7.98e-43	3.92e-69	0.772945	0.99	0.954	9.37e-65	2.19e-129	0.569544	0.995	0.99	5.24e-125	9.1e-95	0.496914	0.998	0.993	2.17e-90	3.8e-73	0.4789	0.996	0.994	9.07e-69	2.31e-155	0.50068	0.994	0.988	5.5e-151	3.34e-47	1.38e-154
Neurons	2	KLHL35	1.58e-14	0.254658	0.214	0.102	3.77e-10	2.71e-12	0.319618	0.181	0.086	6.48e-08	2.32e-100	0.747256	0.667	0.264	5.55e-96	3.79e-63	0.731972	0.485	0.201	9.05e-59	1.02e-49	0.776691	0.405	0.152	2.45e-45	8.75e-154	0.818623	0.638	0.236	2.09e-149	2.71e-12	5.25e-153
Neurons	2	FXYD7	4.13e-58	0.554603	0.354	0.108	9.85e-54	2.94e-32	0.603574	0.299	0.119	7.01e-28	8.5e-127	0.765901	0.581	0.189	2.03e-122	1.01e-82	0.802433	0.434	0.15	2.42e-78	4.17e-78	0.849359	0.399	0.115	9.95e-74	4e-148	0.824727	0.493	0.169	9.56e-144	2.94e-32	2.4e-147
Neurons	2	CAMK2N1	1.18e-50	1.03293	0.702	0.497	2.82e-46	3.13e-36	0.975431	0.599	0.403	7.46e-32	7.16e-92	0.83724	0.85	0.58	1.71e-87	3.82e-50	0.812934	0.688	0.499	9.12e-46	7.26e-64	1.04821	0.729	0.463	1.73e-59	5.22e-138	0.965964	0.822	0.559	1.25e-133	3.13e-36	3.13e-137
Neurons	2	CDKN2D	1.26e-41	0.730008	0.522	0.278	3.01e-37	3.7e-20	0.61085	0.455	0.294	8.83e-16	5.32e-84	0.715044	0.741	0.425	1.27e-79	1.2e-86	0.967005	0.65	0.33	2.86e-82	5.58e-67	0.969184	0.605	0.289	1.33e-62	2.27e-135	0.870472	0.729	0.393	5.42e-131	3.7e-20	1.36e-134
Neurons	2	SNCG	1.16e-25	0.781757	0.474	0.293	2.76e-21	1.82e-21	0.931408	0.41	0.251	4.33e-17	3.43e-97	0.781449	0.57	0.221	8.18e-93	8.1e-80	1.16264	0.594	0.286	1.93e-75	6.65e-52	1.28746	0.719	0.516	1.59e-47	1.37e-134	0.883045	0.567	0.23	3.27e-130	1.82e-21	8.22e-134
Neurons	2	MAP2	5.97e-23	0.527521	0.776	0.686	1.43e-18	1.72e-14	0.505087	0.738	0.691	4.12e-10	2.18e-93	0.815399	0.935	0.816	5.2e-89	2.48e-43	0.629456	0.844	0.766	5.92e-39	8.63e-34	0.78326	0.789	0.683	2.06e-29	2.15e-130	0.799258	0.913	0.724	5.14e-126	1.72e-14	1.29e-129
Neurons	2	TAGLN3	2.63e-30	0.696934	0.654	0.466	6.27e-26	3.92e-17	0.651495	0.599	0.467	9.35e-13	2.24e-79	0.592732	0.907	0.737	5.35e-75	3.51e-130	1.28399	0.916	0.64	8.38e-126	4.1e-110	1.43676	0.884	0.621	9.79e-106	7.94e-96	0.528439	0.908	0.741	1.9e-91	3.92e-17	2.11e-129
Neurons	2	ATP1A3	5.55e-34	0.65409	0.495	0.275	1.32e-29	1.26e-12	0.506964	0.345	0.226	3.01e-08	1.63e-104	0.801052	0.657	0.278	3.88e-100	4.67e-42	0.593346	0.434	0.225	1.12e-37	8.55e-33	0.684379	0.448	0.249	2.04e-28	2.97e-125	0.725991	0.586	0.252	7.09e-121	1.26e-12	1.78e-124
Neurons	2	EVL	7.3e-07	0.463422	0.562	0.529	0.0174315	3.44e-16	0.743085	0.58	0.499	8.21e-12	4.01e-88	0.830073	0.875	0.802	9.57e-84	1.54e-55	0.908222	0.762	0.657	3.68e-51	5.05e-26	0.865701	0.684	0.624	1.2e-21	8.48e-124	0.799957	0.877	0.768	2.03e-119	7.3e-07	5.09e-123
Neurons	2	ACTG1	1.26e-30	0.534233	0.983	0.979	3.02e-26	1.8e-33	0.589004	0.981	0.972	4.31e-29	2.73e-68	0.454059	0.997	0.994	6.53e-64	9.31e-123	0.758134	0.998	0.996	2.22e-118	5.07e-101	0.79737	0.998	0.995	1.21e-96	3.78e-92	0.433798	0.997	0.994	9.02e-88	1.26e-30	5.59e-122
Neurons	2	UNCX	6.12e-31	0.487008	0.229	0.077	1.46e-26	1.49e-15	0.34145	0.154	0.06	3.55e-11	7.99e-95	0.757072	0.589	0.214	1.91e-90	1.38e-85	0.68571	0.385	0.11	3.29e-81	5.91e-77	0.73691	0.295	0.064	1.41e-72	4.87e-119	0.638486	0.545	0.203	1.16e-114	1.49e-15	2.92e-118
Neurons	2	VAMP2	3.12e-17	0.579404	0.675	0.64	7.44e-13	1.31e-08	0.505019	0.593	0.582	0.000313767	4.02e-88	0.752344	0.9	0.889	9.61e-84	7.14e-70	0.834362	0.852	0.81	1.71e-65	2.23e-36	0.681482	0.831	0.854	5.33e-32	3.02e-114	0.716639	0.91	0.858	7.22e-110	1.31e-08	1.81e-113
Neurons	2	C4orf48	1.59e-32	0.91032	0.757	0.668	3.79e-28	7.43e-35	1.05096	0.746	0.633	1.77e-30	1.11e-86	0.686177	0.941	0.926	2.65e-82	1.31e-113	1.08757	0.913	0.866	3.13e-109	2.84e-60	0.999927	0.87	0.828	6.78e-56	1.5e-94	0.606185	0.924	0.895	3.58e-90	1.59e-32	7.87e-113
Neurons	2	PAFAH1B3	3.57e-21	0.64666	0.62	0.496	8.52e-17	1.08e-10	0.597781	0.551	0.476	2.59e-06	2.54e-101	0.982789	0.883	0.819	6.07e-97	3.39e-101	1.0487	0.891	0.798	8.1e-97	2.84e-37	0.836103	0.775	0.746	6.77e-33	6.68e-112	0.874904	0.848	0.752	1.59e-107	1.08e-10	4.01e-111
Neurons	2	GDI1	3.1e-10	0.401788	0.602	0.525	7.4e-06	5.47e-06	0.530208	0.509	0.492	0.130665	1.32e-70	0.695152	0.846	0.751	3.14e-66	9.29e-54	0.82313	0.712	0.547	2.22e-49	8.16e-17	0.649873	0.589	0.502	1.95e-12	1.74e-111	0.756226	0.872	0.74	4.16e-107	5.47e-06	1.05e-110
Neurons	2	ETFB	0.000370888	0.444182	0.423	0.371	1	1.55e-09	0.54582	0.37	0.274	3.69e-05	6.92e-90	0.960787	0.85	0.723	1.65e-85	2.68e-111	1.2063	0.877	0.77	6.39e-107	1.36e-65	1.09199	0.851	0.784	3.25e-61	2.74e-109	0.854036	0.817	0.66	6.54e-105	0.000370888	1.61e-110
Neurons	2	CPE	3.89e-38	0.717476	0.637	0.419	9.3e-34	1.46e-25	0.74078	0.603	0.442	3.48e-21	3.71e-71	0.800282	0.816	0.602	8.86e-67	3.71e-73	0.969369	0.762	0.522	8.85e-69	7.17e-44	0.850268	0.711	0.493	1.71e-39	1.6e-110	0.779687	0.77	0.497	3.82e-106	1.46e-25	9.61e-110
Neurons	2	RBFOX2	1.57e-17	0.413518	0.566	0.415	3.74e-13	3.44e-10	0.426206	0.501	0.407	8.2e-06	2.34e-95	0.878166	0.863	0.645	5.58e-91	2.26e-66	0.892588	0.742	0.548	5.4e-62	1.64e-44	0.872527	0.68	0.481	3.91e-40	5.46e-110	0.776131	0.815	0.598	1.3e-105	3.44e-10	3.28e-109
Neurons	2	APLP1	3.35e-10	0.459414	0.562	0.487	8.01e-06	1.87e-11	0.541389	0.526	0.444	4.48e-07	1.08e-103	0.895337	0.894	0.777	2.58e-99	2.38e-61	0.933247	0.694	0.509	5.69e-57	4.47e-28	0.79891	0.645	0.542	1.07e-23	7.54e-108	0.725628	0.878	0.771	1.8e-103	3.35e-10	4.52e-107
Neurons	2	EEF1A2	9.68e-71	1.20139	0.772	0.538	2.31e-66	8.04e-19	0.789871	0.69	0.644	1.92e-14	9.51e-105	0.997641	0.869	0.634	2.27e-100	2.56e-54	0.909522	0.533	0.294	6.11e-50	6.23e-41	0.838129	0.554	0.32	1.49e-36	5.49e-89	0.741015	0.816	0.633	1.31e-84	8.04e-19	5.71e-104
Neurons	2	OLFM1	2.51e-35	0.697151	0.413	0.194	5.99e-31	5.66e-27	0.740432	0.389	0.202	1.35e-22	3.97e-86	0.857436	0.676	0.347	9.49e-82	1.96e-95	1.14355	0.663	0.321	4.67e-91	1.21e-72	1.07617	0.591	0.266	2.88e-68	6.16e-104	0.81305	0.6	0.303	1.47e-99	5.66e-27	3.69e-103
Neurons	2	DPYSL3	3.87e-13	0.420271	0.56	0.435	9.23e-09	1.4e-16	0.573456	0.522	0.373	3.35e-12	5.27e-92	0.813703	0.829	0.505	1.26e-87	6.61e-69	0.843335	0.714	0.439	1.58e-64	1.44e-34	0.869395	0.63	0.43	3.43e-30	2.12e-103	0.749631	0.777	0.49	5.06e-99	3.87e-13	1.27e-102
Neurons	2	CCDC23	6.91e-16	0.647002	0.576	0.48	1.65e-11	7.24e-08	0.57724	0.516	0.484	0.00172728	1.3e-63	0.699894	0.829	0.741	3.11e-59	8.54e-72	0.921367	0.808	0.695	2.04e-67	1.67e-28	0.836781	0.717	0.665	3.98e-24	1.45e-102	0.765947	0.827	0.683	3.47e-98	7.24e-08	8.72e-102
Neurons	2	LBH	3.49e-08	0.404857	0.348	0.25	0.000833301	2.84e-07	0.424214	0.337	0.253	0.00678802	4.88e-93	0.754961	0.656	0.291	1.16e-88	2.5e-76	0.889818	0.605	0.3	5.97e-72	1.88e-51	0.777952	0.436	0.177	4.49e-47	9.93e-94	0.662385	0.555	0.263	2.37e-89	2.84e-07	5.96e-93
Neurons	2	BEX2	2.54e-20	0.534564	0.532	0.358	6.06e-16	5.14e-11	0.584113	0.462	0.36	1.23e-06	1.15e-60	0.712714	0.793	0.597	2.74e-56	4.49e-55	0.794552	0.796	0.67	1.07e-50	4.06e-58	0.954727	0.843	0.758	9.69e-54	7.99e-92	0.735871	0.761	0.546	1.91e-87	5.14e-11	4.79e-91
Neurons	2	NOVA1	0.00620918	0.320363	0.61	0.639	1	0.00116681	0.359091	0.555	0.538	1	7.02e-88	0.936334	0.914	0.854	1.68e-83	3.42e-19	0.606083	0.668	0.607	8.16e-15	3.24e-08	0.572633	0.616	0.598	0.000772726	1.27e-90	0.694371	0.906	0.823	3.04e-86	0.00620918	7.65e-90
Neurons	2	NRXN1	2.77e-22	0.263526	0.354	0.173	6.61e-18	8.75e-21	0.267106	0.335	0.165	2.09e-16	3.99e-74	0.656502	0.542	0.223	9.54e-70	7.27e-85	0.803673	0.567	0.223	1.74e-80	1.28e-77	0.861643	0.481	0.158	3.06e-73	5.01e-89	0.534234	0.423	0.158	1.2e-84	8.75e-21	3.01e-88
Neurons	2	EIF1B	4.54e-41	0.711553	0.849	0.84	1.08e-36	1.16e-13	0.478129	0.817	0.822	2.78e-09	6.9e-58	0.52752	0.913	0.912	1.65e-53	5.1e-53	0.615089	0.878	0.9	1.22e-48	4.63e-33	0.628276	0.866	0.904	1.1e-28	1.19e-86	0.576738	0.902	0.884	2.83e-82	1.16e-13	7.12e-86
Neurons	2	PKIA	2.12e-49	0.932342	0.66	0.419	5.07e-45	4.44e-21	0.772539	0.555	0.412	1.06e-16	1.81e-75	0.74714	0.782	0.51	4.33e-71	4.89e-61	0.895467	0.722	0.52	1.17e-56	1.86e-38	0.930479	0.616	0.414	4.45e-34	3.22e-86	0.678968	0.719	0.483	7.68e-82	4.44e-21	1.93e-85
Neurons	2	PTMS	6.16e-32	0.624894	0.902	0.851	1.47e-27	1.59e-35	0.613067	0.898	0.855	3.8e-31	1.14e-83	0.562587	0.984	0.971	2.71e-79	9.11e-47	0.592737	0.942	0.955	2.18e-42	1.5e-44	0.646468	0.961	0.954	3.58e-40	1.14e-58	0.436967	0.971	0.959	2.71e-54	6.16e-32	6.82e-83
Neurons	2	HOXA10	3.02e-28	0.733208	0.533	0.344	7.2e-24	4.79e-05	0.545831	0.274	0.216	1	5.18e-54	0.757571	0.79	0.605	1.24e-49	0.717798	0.334302	0.179	0.203	1	1.56e-13	0.720403	0.44	0.338	3.72e-09	3.25e-83	0.755939	0.791	0.619	7.77e-79	0.717798	1.95e-82
Neurons	2	ELAVL3	2.48e-21	0.47576	0.681	0.518	5.92e-17	4.65e-16	0.438877	0.636	0.518	1.11e-11	1.33e-67	0.627079	0.843	0.535	3.18e-63	6.8e-48	0.637812	0.729	0.528	1.62e-43	9.08e-30	0.73541	0.659	0.488	2.17e-25	2.67e-82	0.566908	0.834	0.549	6.38e-78	4.65e-16	1.6e-81
Neurons	2	GABARAPL2	3.31e-15	0.567693	0.679	0.615	7.91e-11	2.22e-19	0.72528	0.659	0.58	5.3e-15	4.65e-46	0.491622	0.897	0.908	1.11e-41	1.15e-58	0.753701	0.844	0.812	2.76e-54	9.6e-35	0.730635	0.783	0.775	2.29e-30	2.64e-80	0.569815	0.894	0.857	6.31e-76	3.31e-15	1.59e-79
Neurons	2	PODXL2	9.59e-07	0.350992	0.386	0.312	0.0229059	0.00014031	0.294676	0.322	0.265	1	2.68e-58	0.687587	0.779	0.614	6.4e-54	1.01e-37	0.729981	0.63	0.498	2.41e-33	2.34e-17	0.676766	0.605	0.546	5.59e-13	1.4e-78	0.683032	0.721	0.532	3.34e-74	0.00014031	8.41e-78
Neurons	2	DDAH2	2.26e-09	0.5294	0.744	0.746	5.39e-05	3.86e-13	0.581087	0.719	0.687	9.22e-09	2.78e-75	0.60903	0.955	0.945	6.63e-71	1.12e-72	0.804601	0.893	0.861	2.68e-68	2.08e-42	0.830398	0.847	0.85	4.96e-38	2.67e-71	0.480363	0.946	0.94	6.37e-67	2.26e-09	1.67e-74
Neurons	2	FAM89B	0.00756931	0.273214	0.243	0.204	1	0.000918152	0.404374	0.218	0.173	1	1.03e-63	0.719779	0.785	0.65	2.46e-59	3.13e-51	0.918046	0.664	0.503	7.46e-47	8.29e-25	0.68668	0.56	0.411	1.98e-20	2.98e-72	0.705903	0.714	0.568	7.12e-68	0.00756931	1.79e-71
Neurons	2	GNAS	3.81e-60	0.9418	0.937	0.912	9.09e-56	9.66e-41	0.657138	0.927	0.902	2.31e-36	8.94e-60	0.389659	0.97	0.973	2.13e-55	7.33e-71	0.633983	0.979	0.98	1.75e-66	5.91e-57	0.750278	0.95	0.975	1.41e-52	2.53e-54	0.338795	0.978	0.972	6.03e-50	9.66e-41	4.4e-70
Neurons	2	CALM1	3.2e-41	0.728155	0.887	0.855	7.65e-37	7.37e-27	0.712838	0.869	0.839	1.76e-22	7.24e-28	0.336085	0.952	0.955	1.73e-23	1.59e-69	0.63147	0.954	0.963	3.79e-65	1.95e-65	0.762655	0.973	0.958	4.65e-61	1.01e-29	0.308869	0.952	0.945	2.41e-25	7.37e-27	9.53e-69
Neurons	2	ATP6V1G2	1.28e-23	0.524142	0.314	0.155	3.05e-19	1.56e-24	0.717569	0.312	0.153	3.73e-20	4.96e-52	0.585807	0.654	0.435	1.18e-47	2.79e-42	0.560765	0.405	0.198	6.67e-38	4.71e-33	0.604031	0.378	0.176	1.12e-28	1.49e-67	0.633421	0.573	0.364	3.55e-63	1.28e-23	8.93e-67
Neurons	2	LPPR3	0.000134987	0.322624	0.352	0.29	1	0.0084971	0.34491	0.316	0.287	1	3.1e-66	0.67287	0.861	0.768	7.41e-62	7.3e-44	0.767507	0.671	0.518	1.74e-39	1.65e-33	0.876256	0.638	0.492	3.94e-29	9.1e-64	0.603406	0.813	0.733	2.17e-59	0.0084971	1.86e-65
Neurons	2	TCEAL7	8.24e-23	0.735056	0.581	0.445	1.97e-18	5.14e-10	0.614858	0.516	0.441	1.23e-05	1.92e-63	0.855209	0.783	0.615	4.57e-59	1.58e-47	0.893422	0.709	0.581	3.78e-43	4.36e-52	1.13814	0.775	0.644	1.04e-47	2.98e-64	0.707001	0.721	0.561	7.12e-60	5.14e-10	1.79e-63
Neurons	2	DPYSL2	1.47e-13	0.457261	0.795	0.783	3.52e-09	5.55e-19	0.658435	0.761	0.735	1.33e-14	2.23e-33	0.470698	0.914	0.88	5.32e-29	2.09e-40	0.692241	0.827	0.806	4.99e-36	4.14e-10	0.620992	0.696	0.698	9.89e-06	9.51e-63	0.52198	0.93	0.892	2.27e-58	4.14e-10	5.7e-62
Neurons	2	PPP1R1A	3.56e-11	0.719802	0.598	0.529	8.51e-07	1.35e-29	1.0622	0.644	0.518	3.21e-25	3.12e-16	0.327021	0.565	0.458	7.45e-12	1.69e-59	1.01273	0.679	0.467	4.03e-55	7.36e-33	0.978309	0.589	0.413	1.76e-28	3.55e-36	0.480417	0.574	0.427	8.47e-32	3.56e-11	1.01e-58
Neurons	2	KLC1	5.95e-29	0.624707	0.618	0.423	1.42e-24	7.68e-14	0.583516	0.522	0.41	1.83e-09	2.09e-44	0.613796	0.745	0.622	4.99e-40	5.82e-31	0.631763	0.635	0.505	1.39e-26	2.42e-27	0.678516	0.603	0.432	5.78e-23	4.03e-59	0.623079	0.741	0.605	9.63e-55	7.68e-14	2.42e-58
Neurons	2	TMEM66	3.02e-15	0.578128	0.711	0.668	7.21e-11	8.44e-12	0.502535	0.682	0.652	2.01e-07	6.58e-37	0.428302	0.888	0.885	1.57e-32	4.19e-50	0.793297	0.811	0.775	9.99e-46	1.1e-34	0.764109	0.787	0.773	2.63e-30	1.16e-58	0.509259	0.872	0.837	2.76e-54	8.44e-12	6.94e-58
Neurons	2	DCTN2	2.34e-21	0.685738	0.658	0.575	5.58e-17	6.69e-13	0.631782	0.593	0.523	1.6e-08	2.21e-30	0.440065	0.849	0.862	5.27e-26	9.81e-24	0.571206	0.747	0.762	2.34e-19	2.32e-20	0.68088	0.725	0.704	5.54e-16	2.88e-58	0.547805	0.849	0.827	6.88e-54	6.69e-13	1.73e-57
Neurons	2	ATP6V0B	6.08e-28	0.714492	0.686	0.552	1.45e-23	6.37e-12	0.617032	0.576	0.519	1.52e-07	1.98e-52	0.570438	0.872	0.859	4.72e-48	5.36e-58	0.816538	0.824	0.777	1.28e-53	1.76e-25	0.775899	0.748	0.765	4.21e-21	1.28e-56	0.520924	0.836	0.808	3.05e-52	6.37e-12	3.21e-57
Neurons	2	SCG5	6.42e-13	0.448121	0.337	0.21	1.53e-08	1.75e-15	0.529098	0.362	0.22	4.17e-11	4.01e-52	0.606683	0.561	0.297	9.57e-48	4.5e-40	0.647843	0.405	0.197	1.07e-35	1.71e-37	0.77524	0.426	0.201	4.09e-33	3.39e-56	0.567232	0.485	0.273	8.09e-52	6.42e-13	2.03e-55
Neurons	2	PCBP4	2.25e-27	0.674326	0.606	0.421	5.37e-23	4.92e-13	0.590364	0.447	0.332	1.17e-08	3.1e-30	0.44576	0.734	0.589	7.41e-26	5.67e-42	0.838623	0.661	0.485	1.35e-37	1.46e-42	0.941687	0.651	0.437	3.5e-38	5.44e-54	0.51488	0.765	0.593	1.3e-49	4.92e-13	3.26e-53
Neurons	2	NDUFB8,1	2.13e-47	0.918986	0.734	0.566	5.09e-43	1.08e-11	0.647996	0.553	0.506	2.58e-07	5.62e-32	0.471404	0.885	0.882	1.34e-27	9.89e-20	0.441608	0.794	0.821	2.36e-15	5.3e-21	0.630501	0.777	0.812	1.26e-16	2.5e-44	0.423566	0.851	0.841	5.96e-40	1.08e-11	1.28e-46
Neurons	2	GPM6A	0.00140855	0.363849	0.371	0.337	1	1.16e-07	0.654973	0.401	0.328	0.0027767	5.85e-44	0.986681	0.603	0.405	1.4e-39	2.12e-42	0.798107	0.646	0.468	5.05e-38	5.4e-12	0.610172	0.43	0.323	1.29e-07	6.12e-46	0.79885	0.498	0.321	1.46e-41	0.00140855	3.67e-45
Neurons	2	CNIH2	4.23e-09	0.496306	0.331	0.238	0.000100917	0.00109895	0.519559	0.274	0.229	1	2.39e-29	0.504246	0.785	0.705	5.69e-25	1.17e-38	0.858376	0.615	0.468	2.79e-34	2.53e-13	0.630496	0.517	0.458	6.05e-09	2.97e-24	0.415049	0.701	0.645	7.09e-20	0.00109895	7e-38
Neurons	2	CLTB	1.57e-33	0.672137	0.442	0.233	3.75e-29	9.78e-08	0.475347	0.27	0.188	0.0023341	6.52e-29	0.5077	0.701	0.607	1.56e-24	2.69e-27	0.725051	0.595	0.498	6.41e-23	3.73e-11	0.537669	0.541	0.493	8.91e-07	1.46e-31	0.471047	0.622	0.525	3.48e-27	9.78e-08	9.42e-33
Neurons	2	PGK1	1.01e-05	0.382164	0.696	0.698	0.241539	1.44e-05	0.49109	0.638	0.654	0.343233	1.06e-17	0.818217	0.861	0.873	2.52e-13	2.12e-13	0.638266	0.735	0.765	5.05e-09	0.000135176	0.540907	0.671	0.757	1	3.51e-32	0.940528	0.864	0.867	8.38e-28	0.000135176	2.11e-31
Neurons	2	HCFC1R1	1.13e-20	0.568043	0.432	0.278	2.69e-16	6.53e-26	0.888272	0.497	0.331	1.56e-21	3.29e-20	0.433391	0.653	0.582	7.84e-16	3.77e-16	0.504939	0.533	0.455	9e-12	1.75e-13	0.608766	0.496	0.397	4.18e-09	3.64e-32	0.482018	0.61	0.516	8.7e-28	1.75e-13	2.19e-31
Neurons	2	MAP1LC3B	2.24e-30	0.910568	0.66	0.539	5.35e-26	9.3e-13	0.731431	0.58	0.511	2.22e-08	7.75e-18	0.345992	0.782	0.745	1.85e-13	3.19e-19	0.508791	0.72	0.713	7.63e-15	2.81e-12	0.570953	0.669	0.667	6.71e-08	4.94e-31	0.444277	0.733	0.679	1.18e-26	2.81e-12	2.96e-30
Radial Glia	3	HIST1H3B	0	2.07682	0.757	0.068	0	0	2.479	0.782	0.08	0	0	1.85565	0.94	0.065	0	0	2.68763	0.939	0.138	0	0	2.05913	0.916	0.109	0	0	1.39145	0.797	0.056	0	0	0
Radial Glia	3	HIST1H3G	0	1.85519	0.713	0.055	0	0	2.25356	0.774	0.071	0	0	1.60208	0.882	0.054	0	0	1.87912	0.887	0.095	0	0	1.48183	0.853	0.084	0	0	1.19189	0.777	0.046	0	0	0
Radial Glia	3	HIST1H1B	0	2.39069	0.775	0.068	0	0	2.42975	0.794	0.104	0	0	2.81779	0.974	0.071	0	0	3.22632	0.962	0.139	0	0	2.68049	0.964	0.124	0	0	1.98542	0.922	0.063	0	0	0
Radial Glia	3	HIST1H2AJ	9.32e-277	0.97796	0.482	0.031	2.22e-272	0	1.26707	0.535	0.028	0	0	1.36941	0.827	0.043	0	0	1.76474	0.883	0.081	0	0	1.18308	0.764	0.059	0	0	1.13213	0.709	0.039	0	9.32e-277	0
Radial Glia	3	HIST1H3F	1.05e-271	0.798609	0.426	0.022	2.51e-267	4.82e-302	1.17573	0.456	0.024	1.15e-297	0	0.766303	0.568	0.027	0	0	1.34709	0.747	0.071	0	0	0.942093	0.616	0.047	0	0	0.549945	0.385	0.018	0	1.05e-271	0
Radial Glia	3	CDK1	5.4e-257	1.33798	0.725	0.091	1.29e-252	1.54e-205	1.18397	0.715	0.113	3.68e-201	0	1.30213	0.921	0.139	0	0	0.94588	0.814	0.153	0	0	0.842717	0.82	0.165	0	0	1.36013	0.905	0.144	0	1.54e-205	0
Radial Glia	3	PBK	3.99e-255	1.15401	0.675	0.075	9.53e-251	5.23e-216	1.13114	0.659	0.089	1.25e-211	0	1.1193	0.842	0.112	0	0	0.975314	0.796	0.144	0	0	0.758839	0.744	0.148	0	0	1.11332	0.795	0.121	0	5.23e-216	0
Radial Glia	3	SPC25	8.67e-249	0.957338	0.547	0.05	2.07e-244	2.31e-234	1.12233	0.574	0.064	5.51e-230	0	1.13698	0.853	0.092	0	0	1.07486	0.785	0.119	0	0	0.790803	0.711	0.114	0	0	1.10454	0.795	0.093	0	2.31e-234	0
Radial Glia	3	HIST1H3D	4.21e-235	2.02114	0.725	0.119	1.01e-230	3.36e-235	2.14181	0.753	0.13	8.02e-231	0	2.6727	0.974	0.101	0	0	3.3469	0.952	0.234	0	0	2.63426	0.932	0.163	0	0	1.69007	0.851	0.063	0	4.21e-235	0
Radial Glia	3	CDCA5	5.72e-217	0.558448	0.459	0.038	1.37e-212	1.66e-197	0.657151	0.465	0.047	3.96e-193	0	0.998085	0.808	0.103	0	0	0.822946	0.718	0.113	0	0	0.736734	0.694	0.11	0	0	0.98518	0.772	0.102	0	1.66e-197	0
Radial Glia	3	TOP2A	2.04e-214	2.07747	0.876	0.19	4.86e-210	2.81e-171	1.84342	0.841	0.22	6.71e-167	2.78e-299	1.8991	0.957	0.222	6.64e-295	0	1.47015	0.931	0.24	0	0	1.2984	0.935	0.263	0	0	1.84191	0.975	0.244	0	2.81e-171	0
Radial Glia	3	MKI67	2.88e-209	1.36619	0.683	0.098	6.89e-205	1.92e-192	1.3354	0.724	0.123	4.59e-188	0	1.61315	0.91	0.142	0	0	1.18911	0.839	0.167	0	0	1.11057	0.826	0.171	0	0	1.51224	0.875	0.151	0	1.92e-192	0
Radial Glia	3	NUSAP1	1.64e-205	1.67913	0.725	0.124	3.92e-201	7.99e-189	1.70174	0.779	0.166	1.91e-184	0	1.92349	0.949	0.204	0	0	1.64165	0.931	0.245	0	0	1.35811	0.941	0.262	0	0	1.94577	0.96	0.205	0	7.99e-189	0
Radial Glia	3	HIST1H2AL	3.95e-205	0.900903	0.476	0.045	9.44e-201	9.42e-248	1.26516	0.579	0.061	2.25e-243	0	0.801008	0.603	0.023	0	0	1.48073	0.772	0.071	0	0	1.02254	0.658	0.053	0	0	0.362107	0.291	0.011	0	3.95e-205	0
Radial Glia	3	BIRC5	1.25e-202	1.23018	0.731	0.118	2.98e-198	2.9e-185	1.14378	0.738	0.131	6.92e-181	1.04e-276	1.1276	0.908	0.179	2.47e-272	2.21e-297	0.883793	0.842	0.216	5.27e-293	1.5e-254	0.718162	0.85	0.243	3.58e-250	0	1.12796	0.885	0.188	0	2.9e-185	0
Radial Glia	3	AURKB	1.79e-198	0.991545	0.565	0.069	4.27e-194	2e-188	1.03113	0.588	0.082	4.76e-184	0	1.04607	0.806	0.109	0	0	0.864131	0.751	0.131	0	0	0.803373	0.76	0.151	0	0	0.897399	0.723	0.107	0	2e-188	0
Radial Glia	3	SGOL1	2.02e-196	0.897503	0.541	0.063	4.83e-192	1.05e-153	0.771453	0.488	0.067	2.5e-149	4.19e-291	1.00029	0.812	0.14	1e-286	0	0.797984	0.723	0.151	0	2.17e-260	0.636647	0.67	0.159	5.18e-256	0	0.985398	0.782	0.146	0	1.05e-153	0
Radial Glia	3	TPX2	8.29e-191	1.23893	0.704	0.118	1.98e-186	4.87e-173	1.25334	0.715	0.135	1.16e-168	9.08e-290	1.20134	0.868	0.161	2.17e-285	0	0.96586	0.837	0.187	0	5.85e-279	0.822636	0.777	0.198	1.4e-274	0	1.16035	0.823	0.159	0	4.87e-173	0
Radial Glia	3	KIAA0101	1.55e-190	1.82443	0.802	0.185	3.7e-186	1.23e-165	1.49309	0.797	0.204	2.93e-161	0	2.19297	0.962	0.243	0	0	1.68481	0.93	0.314	0	0	1.62048	0.952	0.324	0	0	2.04386	0.949	0.249	0	1.23e-165	0
Radial Glia	3	RAD51AP1	6.96e-189	0.919572	0.547	0.07	1.66e-184	2.5e-180	0.882451	0.535	0.074	5.96e-176	0	1.21367	0.876	0.137	0	0	1.05515	0.798	0.166	0	0	0.956758	0.812	0.178	0	0	1.21326	0.835	0.133	0	2.5e-180	0
Radial Glia	3	HIST1H4C	8.64e-185	3.32667	0.985	0.621	2.06e-180	2.09e-175	3.13833	0.985	0.707	4.99e-171	3.72e-268	3.92545	0.994	0.899	8.89e-264	0	3.40589	0.999	0.783	0	0	3.3339	0.997	0.741	0	0	3.75868	0.995	0.88	0	2.09e-175	0
Radial Glia	3	GTSE1	1.47e-182	1.00947	0.55	0.071	3.51e-178	6.93e-188	0.914159	0.594	0.081	1.66e-183	0	1.06872	0.842	0.127	0	0	0.763627	0.699	0.132	0	1.36e-270	0.680233	0.667	0.147	3.24e-266	0	1.02262	0.8	0.134	0	1.47e-182	0
Radial Glia	3	CKS1B	1.81e-178	1.64937	0.852	0.238	4.33e-174	4.11e-146	1.6149	0.853	0.298	9.81e-142	1.72e-216	1.37441	0.936	0.342	4.11e-212	0	1.34755	0.938	0.391	0	3.21e-299	1.14722	0.959	0.424	7.67e-295	1.36e-290	1.26179	0.92	0.314	3.25e-286	4.11e-146	0
Radial Glia	3	NUF2	1.06e-173	0.703168	0.527	0.066	2.53e-169	1.45e-150	0.697571	0.535	0.08	3.47e-146	0	0.819839	0.771	0.106	0	0	0.769933	0.742	0.145	0	7.62e-307	0.662449	0.741	0.158	1.82e-302	0	0.828302	0.74	0.107	0	1.45e-150	0
Radial Glia	3	MAD2L1	5.66e-171	1.05852	0.775	0.173	1.35e-166	8.01e-154	1.075	0.712	0.155	1.91e-149	7.56e-298	1.26042	0.917	0.197	1.81e-293	0	1.06405	0.877	0.24	0	1.86e-300	0.939823	0.882	0.284	4.45e-296	0	1.20769	0.886	0.186	0	8.01e-154	0
Radial Glia	3	RRM2	6.42e-170	0.71052	0.479	0.058	1.53e-165	4.99e-190	0.812061	0.476	0.052	1.19e-185	0	1.44388	0.874	0.117	0	0	1.25075	0.825	0.14	0	0	0.987924	0.776	0.146	0	0	1.58833	0.885	0.127	0	6.42e-170	0
Radial Glia	3	CENPU	2.17e-168	1.01991	0.666	0.122	5.17e-164	8.4e-119	0.823956	0.588	0.129	2.01e-114	2.36e-276	1.20568	0.885	0.197	5.63e-272	1.2e-282	0.979773	0.85	0.272	2.86e-278	3.78e-284	0.822453	0.842	0.261	9.01e-280	0	1.25604	0.862	0.198	0	8.4e-119	0
Radial Glia	3	ASPM	4.15e-165	1.0094	0.607	0.097	9.91e-161	2.01e-140	0.953817	0.6	0.11	4.8e-136	1.11e-271	0.86726	0.788	0.126	2.65e-267	1.84e-307	0.743632	0.746	0.157	4.38e-303	8.21e-255	0.63338	0.697	0.163	1.96e-250	0	0.890386	0.758	0.138	0	2.01e-140	0
Radial Glia	3	HIST1H2AH	9.18e-165	1.2525	0.577	0.096	2.19e-160	1.42e-186	1.58604	0.638	0.112	3.4e-182	0	1.35278	0.846	0.072	0	0	1.33935	0.786	0.124	0	0	1.14316	0.727	0.1	0	0	1.01121	0.654	0.053	0	9.18e-165	0
Radial Glia	3	DLGAP5	9.3e-165	1.02478	0.5	0.064	2.22e-160	4.27e-164	0.95985	0.559	0.082	1.02e-159	2.37e-301	1.05337	0.791	0.117	5.65e-297	0	0.856862	0.708	0.13	0	5.25e-268	0.674171	0.685	0.15	1.25e-263	0	1.01029	0.749	0.118	0	4.27e-164	0
Radial Glia	3	UBE2C	9.39e-164	1.32569	0.704	0.136	2.24e-159	5.56e-150	1.0863	0.747	0.168	1.33e-145	5.37e-281	0.982848	0.908	0.184	1.28e-276	0	0.727837	0.838	0.193	0	2.59e-272	0.519621	0.852	0.238	6.19e-268	0	0.984826	0.888	0.189	0	5.56e-150	0
Radial Glia	3	HIST1H2BH	2.63e-161	0.736104	0.473	0.061	6.27e-157	3.38e-160	0.850609	0.432	0.052	8.07e-156	0	0.848006	0.724	0.086	0	0	1.17006	0.778	0.131	0	0	0.874183	0.675	0.111	0	3.77e-259	0.62938	0.52	0.084	8.99e-255	3.38e-160	0
Radial Glia	3	HIST1H1E	1.62e-158	2.0236	0.926	0.387	3.86e-154	7.01e-150	1.9419	0.918	0.422	1.67e-145	0	1.91914	0.953	0.26	0	0	1.95805	0.946	0.463	0	0	1.82955	0.94	0.358	0	0	1.84774	0.909	0.209	0	7.01e-150	0
Radial Glia	3	CENPK	8.62e-157	0.828108	0.565	0.092	2.06e-152	2.18e-144	0.761835	0.524	0.085	5.22e-140	6.01e-284	0.991949	0.833	0.161	1.44e-279	5.19e-292	0.886762	0.805	0.231	1.24e-287	0	0.867636	0.817	0.231	0	0	0.98949	0.786	0.163	0	2.18e-144	0
Radial Glia	3	HIST1H1D	1.36e-151	1.68745	0.645	0.138	3.25e-147	4.96e-149	1.86943	0.7	0.173	1.18e-144	0	2.14117	0.848	0.09	0	0	2.20738	0.906	0.2	0	0	2.05662	0.876	0.169	0	0	2.01764	0.851	0.108	0	4.96e-149	0
Radial Glia	3	NDC80	4.26e-150	0.559631	0.396	0.042	1.02e-145	2.9e-130	0.612056	0.385	0.049	6.92e-126	0	1.21016	0.861	0.109	0	0	0.868913	0.705	0.113	0	0	0.737165	0.666	0.125	0	0	1.06466	0.769	0.11	0	2.9e-130	0
Radial Glia	3	NCAPG	5.64e-150	0.733357	0.527	0.08	1.35e-145	1.15e-127	0.72358	0.521	0.093	2.74e-123	2.1e-294	1.03433	0.803	0.139	5.01e-290	5.94e-303	0.854405	0.726	0.165	1.42e-298	0	0.682639	0.728	0.162	0	0	0.979004	0.769	0.134	0	1.15e-127	0
Radial Glia	3	HIST1H2AM	5.02e-146	0.902569	0.568	0.103	1.2e-141	2.99e-177	1.05902	0.594	0.097	7.13e-173	0	1.43665	0.868	0.092	0	0	1.4854	0.853	0.148	0	0	0.962712	0.719	0.104	0	0	1.04158	0.722	0.069	0	5.02e-146	0
Radial Glia	3	FBXO5	6e-146	0.899774	0.615	0.12	1.43e-141	3.09e-108	0.930058	0.556	0.13	7.38e-104	2.93e-274	1.12872	0.863	0.201	7e-270	1.84e-257	0.914466	0.771	0.243	4.39e-253	2.16e-278	0.827912	0.781	0.237	5.16e-274	0	1.04554	0.806	0.178	0	3.09e-108	0
Radial Glia	3	CENPM	1.72e-142	0.466375	0.396	0.046	4.1e-138	2.49e-124	0.526125	0.415	0.061	5.94e-120	0	1.09566	0.833	0.154	0	1.12e-299	0.764875	0.748	0.185	2.68e-295	8.5e-292	0.753143	0.756	0.201	2.03e-287	0	1.02637	0.795	0.137	0	2.49e-124	0
Radial Glia	3	CENPF	9.16e-137	1.36421	0.754	0.196	2.19e-132	5.06e-117	1.11216	0.785	0.237	1.21e-112	9.28e-252	1.53037	0.97	0.282	2.21e-247	1.28e-294	1.0546	0.916	0.313	3.05e-290	5.43e-278	0.926727	0.943	0.353	1.3e-273	0	1.41364	0.955	0.29	0	5.06e-117	0
Radial Glia	3	MND1	4.16e-131	0.817186	0.53	0.096	9.93e-127	1.46e-111	0.655809	0.494	0.095	3.5e-107	1.85e-287	0.897775	0.782	0.136	4.41e-283	1.81e-241	0.741513	0.73	0.205	4.33e-237	3.24e-271	0.749371	0.784	0.227	7.74e-267	0	0.919914	0.74	0.138	0	1.46e-111	0
Radial Glia	3	PRC1	1.19e-130	0.930083	0.642	0.14	2.83e-126	4.54e-111	0.868345	0.644	0.162	1.08e-106	3.21e-259	1.09015	0.859	0.183	7.67e-255	6.36e-269	0.760881	0.743	0.187	1.52e-264	3.16e-230	0.641045	0.711	0.196	7.54e-226	0	1.00699	0.805	0.175	0	4.54e-111	0
Radial Glia	3	HIST1H3H	8.41e-130	0.649301	0.444	0.065	2.01e-125	2.41e-168	1.13634	0.491	0.064	5.75e-164	0	0.539277	0.436	0.019	0	0	1.18365	0.763	0.066	0	0	0.722824	0.559	0.038	0	8.46e-285	0.351116	0.266	0.014	2.02e-280	8.41e-130	0
Radial Glia	3	HIST1H1C	1.33e-124	2.35033	0.929	0.467	3.17e-120	6.91e-132	2.24114	0.962	0.535	1.65e-127	0	2.89562	0.968	0.251	0	0	2.92902	0.959	0.374	0	0	2.74734	0.977	0.312	0	0	2.54277	0.963	0.237	0	1.33e-124	0
Radial Glia	3	ZWINT	1.54e-124	0.445287	0.349	0.041	3.68e-120	1.79e-101	0.432248	0.338	0.049	4.27e-97	0	1.11853	0.85	0.16	0	0	0.751868	0.746	0.175	0	1.28e-306	0.769627	0.762	0.193	3.05e-302	0	1.10616	0.823	0.148	0	1.79e-101	0
Radial Glia	3	TYMS	2.2e-122	1.15437	0.763	0.237	5.24e-118	1.33e-97	1.12224	0.671	0.217	3.19e-93	1.42e-284	2.04065	0.968	0.33	3.39e-280	0	1.54358	0.946	0.425	0	1.84e-307	1.36731	0.95	0.481	4.38e-303	0	1.90577	0.952	0.359	0	1.33e-97	0
Radial Glia	3	HIST1H4D	2.58e-115	0.863223	0.473	0.087	6.17e-111	4.36e-126	0.914944	0.518	0.097	1.04e-121	0	0.811006	0.637	0.051	0	0	1.30356	0.751	0.13	0	0	0.81939	0.574	0.076	0	2.23e-306	0.435662	0.334	0.023	5.32e-302	2.58e-115	0
Radial Glia	3	HIST2H2BF	4.13e-106	0.84209	0.533	0.119	9.85e-102	3.45e-157	1.07519	0.556	0.091	8.23e-153	0	0.632909	0.551	0.048	0	0	1.14482	0.708	0.084	0	0	0.77715	0.549	0.063	0	0	0.698662	0.405	0.033	0	4.13e-106	0
Radial Glia	3	HIST2H2AC	1.09e-101	1.51077	0.598	0.175	2.61e-97	1.94e-177	1.79914	0.679	0.138	4.62e-173	4.71e-277	1.73822	0.906	0.281	1.13e-272	0	2.43093	0.928	0.446	0	0	1.97719	0.905	0.357	0	0	1.39092	0.809	0.154	0	1.09e-101	0
Radial Glia	3	SMC4	4.35e-99	0.947317	0.636	0.18	1.04e-94	5.34e-117	0.917445	0.688	0.183	1.28e-112	1.77e-271	1.54487	0.915	0.243	4.22e-267	2.11e-302	1.20874	0.875	0.3	5.05e-298	1.07e-298	1.0712	0.866	0.294	2.56e-294	0	1.41605	0.897	0.233	0	4.35e-99	0
Radial Glia	3	ATAD2	9.48e-99	0.683316	0.503	0.11	2.26e-94	7.53e-127	0.967404	0.612	0.137	1.8e-122	0	1.19875	0.85	0.163	0	5.1e-293	0.97383	0.795	0.227	1.22e-288	1.65e-299	0.866108	0.769	0.206	3.94e-295	0	1.21701	0.828	0.149	0	9.48e-99	0
Radial Glia	3	HIST1H2AG	1.59e-98	1.20555	0.698	0.231	3.8e-94	5.93e-90	1.23525	0.735	0.276	1.41e-85	0	1.52204	0.897	0.142	0	0	2.44381	0.938	0.262	0	0	1.74476	0.869	0.195	0	0	0.972126	0.663	0.097	0	5.93e-90	0
Radial Glia	3	CLSPN	5.65e-97	0.728322	0.485	0.103	1.35e-92	1.14e-104	0.890009	0.535	0.123	2.71e-100	3.3e-277	1.24101	0.878	0.196	7.87e-273	3.75e-254	0.90233	0.796	0.248	8.94e-250	0	0.971536	0.836	0.249	0	0	1.3062	0.843	0.193	0	5.65e-97	0
Radial Glia	3	HIST1H2AE	1.77e-83	0.900343	0.624	0.204	4.23e-79	1.23e-76	0.94074	0.624	0.216	2.93e-72	2.87e-98	0.494595	0.594	0.189	6.86e-94	0	1.13073	0.801	0.211	0	0	0.819852	0.641	0.133	0	1.75e-99	0.403338	0.435	0.126	4.19e-95	1.23e-76	0
Radial Glia	3	RNASEH2A	1.41e-71	0.505164	0.47	0.125	3.37e-67	7.18e-89	0.609466	0.494	0.119	1.71e-84	7.63e-220	1.27178	0.908	0.337	1.82e-215	1.74e-268	1.0432	0.897	0.365	4.16e-264	3.5e-249	0.910912	0.88	0.374	8.37e-245	0	1.28423	0.906	0.312	0	1.41e-71	0
Radial Glia	3	DHFR	3.38e-75	0.667397	0.476	0.124	8.07e-71	1.43e-77	0.724741	0.468	0.12	3.42e-73	1.02e-222	1.20419	0.872	0.272	2.43e-218	2.1e-251	1.03732	0.822	0.302	5.01e-247	1.69e-240	0.891362	0.809	0.301	4.02e-236	8.33e-307	1.25091	0.854	0.251	1.99e-302	3.38e-75	5e-306
Radial Glia	3	MIS18BP1	4.35e-148	1.05037	0.669	0.137	1.04e-143	1.64e-103	0.909173	0.618	0.156	3.91e-99	3.54e-228	0.892879	0.791	0.168	8.46e-224	1.11e-196	0.641754	0.722	0.226	2.65e-192	1.41e-193	0.663359	0.708	0.232	3.36e-189	4.14e-304	0.917798	0.785	0.172	9.89e-300	1.64e-103	2.49e-303
Radial Glia	3	ORC6	4.17e-91	0.834852	0.642	0.195	9.95e-87	6.28e-63	0.647043	0.579	0.204	1.5e-58	3.69e-227	1.16172	0.919	0.296	8.82e-223	2.08e-281	1.04548	0.889	0.336	4.98e-277	2.19e-269	0.974925	0.895	0.362	5.23e-265	4.04e-301	1.2358	0.906	0.293	9.64e-297	6.28e-63	2.42e-300
Radial Glia	3	UBE2T	6.28e-108	1.03715	0.633	0.171	1.5e-103	1.14e-126	1.04704	0.626	0.143	2.73e-122	9.44e-231	0.95669	0.835	0.206	2.25e-226	4.06e-297	1.16965	0.911	0.356	9.69e-293	8.73e-286	1.01446	0.9	0.339	2.08e-281	9.81e-294	0.979863	0.789	0.193	2.34e-289	6.28e-108	2.43e-296
Radial Glia	3	HMGB1	6.19e-123	1.44517	0.988	0.918	1.48e-118	5.05e-106	1.49553	0.968	0.893	1.2e-101	5.37e-204	1.39623	0.996	0.977	1.28e-199	4.33e-297	1.14148	0.999	0.983	1.03e-292	2.89e-281	1.04393	0.999	0.978	6.9e-277	2.46e-266	1.34647	0.989	0.971	5.86e-262	5.05e-106	2.6e-296
Radial Glia	3	TUBA1B	4.3e-111	1.58172	0.964	0.811	1.03e-106	3.66e-103	1.4491	0.965	0.846	8.73e-99	1.22e-205	1.50585	0.998	0.975	2.91e-201	1.62e-289	1.18018	0.998	0.97	3.87e-285	2.18e-292	1.13093	0.997	0.968	5.2e-288	1.76e-281	1.41276	0.997	0.973	4.19e-277	3.66e-103	1.31e-291
Radial Glia	3	H2AFX	3.9e-70	1.08915	0.63	0.246	9.32e-66	1.31e-108	1.32053	0.744	0.258	3.12e-104	1.52e-215	1.5872	0.955	0.457	3.62e-211	4.55e-285	1.25573	0.939	0.452	1.09e-280	7.08e-262	1.10251	0.931	0.448	1.69e-257	8.42e-286	1.47777	0.945	0.411	2.01e-281	3.9e-70	5.05e-285
Radial Glia	3	HMGB2	3.82e-122	1.56594	0.985	0.787	9.11e-118	5.87e-107	1.50096	0.971	0.739	1.4e-102	2.12e-195	1.70979	0.985	0.687	5.07e-191	1.7e-285	1.449	0.979	0.676	4.05e-281	6.35e-249	1.0223	0.992	0.867	1.52e-244	2.53e-253	1.5677	0.977	0.692	6.03e-249	5.87e-107	1.02e-284
Radial Glia	3	CENPH	5.36e-109	0.939723	0.725	0.225	1.28e-104	4.49e-102	1.03553	0.691	0.212	1.07e-97	8.91e-231	1.04605	0.876	0.244	2.13e-226	4.48e-238	0.908779	0.874	0.358	1.07e-233	5.96e-235	0.835314	0.879	0.366	1.42e-230	2.26e-283	1.05007	0.842	0.239	5.39e-279	4.49e-102	1.35e-282
Radial Glia	3	H2AFZ	2.64e-57	0.943439	0.938	0.786	6.3e-53	5.36e-55	0.921867	0.947	0.768	1.28e-50	3.41e-204	1.43196	0.998	0.96	8.14e-200	1.37e-253	1.01289	0.992	0.963	3.28e-249	3.73e-238	0.962624	0.992	0.949	8.9e-234	1.24e-269	1.3596	0.997	0.946	2.95e-265	5.36e-55	7.41e-269
Radial Glia	3	HMGN2	1.56e-91	1.29077	0.956	0.822	3.73e-87	2.34e-92	1.37378	0.938	0.805	5.6e-88	1.34e-192	1.35151	0.994	0.956	3.21e-188	1.27e-268	1.14157	0.993	0.93	3.04e-264	3.86e-261	0.963046	0.998	0.956	9.22e-257	9.73e-257	1.349	0.988	0.954	2.32e-252	1.56e-91	7.64e-268
Radial Glia	3	C21orf58	7.08e-155	0.996712	0.618	0.116	1.69e-150	1.6e-139	1.06944	0.612	0.125	3.81e-135	2.39e-248	0.882023	0.782	0.161	5.71e-244	5.14e-265	0.748782	0.686	0.171	1.23e-260	2.98e-239	0.649975	0.641	0.166	7.11e-235	4.62e-253	0.723054	0.649	0.139	1.1e-248	1.6e-139	3.08e-264
Radial Glia	3	GMNN	8.14e-65	0.703868	0.571	0.196	1.94e-60	2.11e-54	0.685021	0.541	0.198	5.04e-50	2.88e-198	1.04098	0.895	0.302	6.87e-194	3.33e-225	0.94036	0.881	0.373	7.94e-221	2.25e-218	0.852208	0.876	0.382	5.37e-214	6.42e-257	1.02517	0.854	0.281	1.53e-252	2.11e-54	3.85e-256
Radial Glia	3	CENPW	2.98e-116	0.623008	0.479	0.086	7.11e-112	7.05e-85	0.613944	0.424	0.091	1.68e-80	3.91e-185	1.08212	0.876	0.321	9.34e-181	5.91e-207	0.75737	0.783	0.273	1.41e-202	1.49e-195	0.701222	0.793	0.298	3.56e-191	7.16e-252	1.05766	0.837	0.266	1.71e-247	7.05e-85	4.3e-251
Radial Glia	3	RRM1	4.41e-55	0.614106	0.574	0.219	1.05e-50	6.57e-68	0.66986	0.579	0.196	1.57e-63	2.13e-199	1.20517	0.906	0.385	5.08e-195	1.44e-206	0.904673	0.85	0.374	3.43e-202	2.55e-219	0.81095	0.851	0.374	6.09e-215	3.94e-251	1.14733	0.889	0.351	9.4e-247	4.41e-55	2.36e-250
Radial Glia	3	SMC2	1.32e-95	0.665483	0.609	0.162	3.15e-91	1.46e-68	0.591983	0.515	0.152	3.48e-64	1.38e-215	1.02179	0.855	0.237	3.31e-211	1.33e-218	0.788478	0.815	0.294	3.17e-214	3.24e-206	0.720127	0.808	0.3	7.73e-202	2.88e-242	0.894762	0.797	0.227	6.88e-238	1.46e-68	1.73e-241
Radial Glia	3	CKAP2	3.63e-68	0.820265	0.633	0.236	8.65e-64	4.26e-74	0.797938	0.703	0.27	1.02e-69	4.2e-165	0.96316	0.861	0.321	1e-160	7.02e-207	0.869497	0.835	0.334	1.68e-202	1.98e-181	0.63047	0.814	0.319	4.72e-177	1.63e-237	1.0246	0.877	0.304	3.89e-233	3.63e-68	9.78e-237
Radial Glia	3	DEK	3.61e-63	1.0269	0.899	0.704	8.63e-59	1.29e-49	0.902473	0.885	0.713	3.08e-45	9.13e-180	1.41721	0.972	0.818	2.18e-175	8.89e-234	1.09228	0.965	0.826	2.12e-229	3.7e-234	1.0347	0.978	0.802	8.84e-230	4.34e-233	1.34542	0.965	0.774	1.04e-228	1.29e-49	2.22e-233
Radial Glia	3	RANBP1	5.93e-46	0.815683	0.858	0.654	1.42e-41	4.39e-47	0.936092	0.826	0.617	1.05e-42	2.47e-173	1.17562	0.983	0.861	5.9e-169	1.02e-230	1.03635	0.971	0.838	2.44e-226	1.11e-233	0.969603	0.974	0.833	2.64e-229	7.14e-216	1.15116	0.974	0.811	1.7e-211	5.93e-46	6.65e-233
Radial Glia	3	HELLS	1.17e-56	0.996288	0.663	0.291	2.8e-52	7.21e-52	0.840848	0.647	0.293	1.72e-47	3.57e-186	1.19808	0.874	0.311	8.52e-182	1.51e-176	0.860133	0.833	0.385	3.61e-172	5.95e-169	0.757807	0.818	0.364	1.42e-164	4.84e-232	1.05365	0.84	0.292	1.16e-227	7.21e-52	2.9e-231
Radial Glia	3	CHEK1	3.27e-107	0.815964	0.609	0.151	7.81e-103	6.36e-95	0.818649	0.574	0.149	1.52e-90	6.72e-183	0.937159	0.878	0.296	1.6e-178	4.76e-195	0.814696	0.815	0.325	1.14e-190	8.96e-174	0.675115	0.786	0.325	2.14e-169	6.51e-227	0.936087	0.809	0.271	1.55e-222	6.36e-95	3.91e-226
Radial Glia	3	CKS2	1.38e-54	0.875702	0.763	0.395	3.3e-50	1.17e-55	0.875753	0.803	0.424	2.8e-51	5.14e-182	1.26196	0.947	0.442	1.23e-177	2.34e-177	0.920795	0.901	0.494	5.58e-173	1.39e-179	0.861156	0.926	0.534	3.32e-175	1.79e-223	1.18553	0.918	0.425	4.27e-219	1.38e-54	1.07e-222
Radial Glia	3	HIST1H4E	7.53e-63	0.930667	0.672	0.298	1.8e-58	2.03e-56	0.861391	0.588	0.241	4.85e-52	1.39e-151	0.800567	0.703	0.211	3.31e-147	5.14e-223	0.969743	0.78	0.302	1.23e-218	2.43e-188	0.746368	0.637	0.207	5.79e-184	9.26e-167	0.616	0.505	0.119	2.21e-162	2.03e-56	3.08e-222
Radial Glia	3	GINS2	8.85e-57	0.541072	0.459	0.139	2.11e-52	2.46e-50	0.507832	0.432	0.135	5.88e-46	1.27e-166	0.978214	0.85	0.289	3.02e-162	2e-160	0.778211	0.833	0.37	4.77e-156	9.24e-158	0.688724	0.818	0.377	2.21e-153	8.73e-222	0.987359	0.831	0.279	2.08e-217	2.46e-50	5.24e-221
Radial Glia	3	PTTG1	5.38e-93	1.27526	0.763	0.291	1.28e-88	5.93e-78	1.08545	0.774	0.332	1.42e-73	3.8e-181	0.952306	0.91	0.308	9.07e-177	5.08e-185	0.731133	0.889	0.383	1.21e-180	2.34e-164	0.531687	0.908	0.418	5.59e-160	1.93e-218	0.896823	0.878	0.303	4.6e-214	5.93e-78	1.16e-217
Radial Glia	3	DNAJC9	1.06e-65	0.596975	0.583	0.195	2.54e-61	3.91e-70	0.570485	0.526	0.158	9.32e-66	6.12e-165	0.965316	0.87	0.35	1.46e-160	1.13e-189	0.834456	0.831	0.369	2.69e-185	4.61e-192	0.709156	0.829	0.357	1.1e-187	4.93e-213	0.944048	0.826	0.31	1.18e-208	1.06e-65	2.96e-212
Radial Glia	3	PCNA	2.25e-15	0.379045	0.42	0.24	5.38e-11	1.44e-23	0.481005	0.465	0.234	3.43e-19	7.39e-163	1.16692	0.897	0.405	1.76e-158	2.66e-177	0.939425	0.87	0.434	6.36e-173	2.95e-191	0.924626	0.912	0.484	7.05e-187	1.05e-212	1.13375	0.871	0.367	2.5e-208	2.25e-15	6.29e-212
Radial Glia	3	USP1	4.76e-46	0.60618	0.63	0.279	1.14e-41	2.82e-40	0.49189	0.612	0.28	6.72e-36	1.54e-154	0.936618	0.88	0.38	3.68e-150	1.94e-172	0.809974	0.86	0.426	4.62e-168	1.99e-160	0.674902	0.822	0.39	4.75e-156	1.74e-207	0.940346	0.862	0.35	4.16e-203	2.82e-40	1.05e-206
Radial Glia	3	MCM7	2.01e-27	0.448137	0.568	0.293	4.79e-23	8.75e-30	0.347135	0.512	0.238	2.09e-25	6.38e-150	1.10251	0.936	0.481	1.52e-145	1.55e-158	0.847108	0.885	0.488	3.71e-154	2.04e-190	0.864519	0.913	0.488	4.88e-186	1.78e-207	1.11765	0.942	0.46	4.26e-203	2.01e-27	1.07e-206
Radial Glia	3	CCDC34	1.44e-96	1.09328	0.787	0.326	3.43e-92	7.27e-94	1.01118	0.709	0.252	1.74e-89	1.27e-161	1.10009	0.908	0.438	3.02e-157	9.6e-194	0.905908	0.902	0.462	2.29e-189	6.73e-195	0.883386	0.903	0.48	1.61e-190	2.72e-185	0.942865	0.838	0.35	6.49e-181	7.27e-94	4.04e-194
Radial Glia	3	RPA3	7.26e-41	0.584228	0.651	0.329	1.73e-36	2.46e-53	0.712155	0.691	0.323	5.86e-49	8.61e-156	1.06055	0.944	0.511	2.06e-151	3.08e-152	0.784136	0.902	0.528	7.34e-148	5.08e-150	0.719813	0.911	0.558	1.21e-145	2.37e-194	1.02154	0.912	0.45	5.65e-190	7.26e-41	1.42e-193
Radial Glia	3	TUBB4B	3.1e-19	0.526945	0.731	0.516	7.4e-15	1.66e-28	0.682736	0.8	0.528	3.96e-24	7.31e-154	1.07002	0.989	0.865	1.75e-149	1.05e-126	0.687855	0.964	0.825	2.5e-122	8.42e-97	0.483218	0.97	0.811	2.01e-92	2.21e-179	1.01547	0.971	0.851	5.27e-175	3.1e-19	1.32e-178
Radial Glia	3	SNRPB	2.87e-31	0.533958	0.796	0.543	6.84e-27	2.45e-37	0.679303	0.779	0.486	5.86e-33	3.83e-142	0.995662	0.968	0.789	9.15e-138	2.68e-168	0.814477	0.955	0.798	6.39e-164	3.14e-172	0.750933	0.973	0.839	7.5e-168	3.9e-164	0.942089	0.963	0.74	9.32e-160	2.87e-31	1.89e-171
Radial Glia	3	H1FX	1.31e-33	0.812599	0.831	0.585	3.13e-29	5.76e-59	1.09987	0.874	0.594	1.37e-54	3.74e-124	1.0358	0.989	0.916	8.92e-120	6.3e-95	0.697537	0.967	0.877	1.5e-90	2.34e-101	0.680699	0.979	0.843	5.6e-97	1.31e-160	1.08098	0.978	0.901	3.13e-156	1.31e-33	7.88e-160
Radial Glia	3	TMPO	4.3e-42	0.831384	0.802	0.576	1.03e-37	1.79e-47	0.813868	0.815	0.545	4.27e-43	1.61e-122	1.07411	0.938	0.675	3.83e-118	5.85e-157	0.875634	0.943	0.705	1.4e-152	9.82e-133	0.714088	0.921	0.634	2.34e-128	2.11e-157	0.982275	0.928	0.595	5.04e-153	4.3e-42	1.27e-156
Radial Glia	3	LSM4	6.99e-48	0.814756	0.855	0.586	1.67e-43	1.16e-48	0.751426	0.856	0.593	2.77e-44	1.79e-137	0.958244	0.976	0.813	4.28e-133	7.64e-133	0.669337	0.957	0.83	1.82e-128	6.76e-133	0.636668	0.964	0.837	1.61e-128	3.29e-156	0.885572	0.955	0.783	7.85e-152	6.99e-48	1.97e-155
Radial Glia	3	NASP	2.39e-25	0.540218	0.822	0.603	5.72e-21	8.17e-24	0.636674	0.776	0.557	1.95e-19	3.29e-135	1.07141	0.983	0.892	7.86e-131	1.65e-115	0.686448	0.958	0.861	3.93e-111	1.03e-129	0.707109	0.976	0.854	2.46e-125	1.57e-149	0.952682	0.971	0.865	3.75e-145	8.17e-24	9.44e-149
Radial Glia	3	HES4	4.97e-36	0.937956	0.923	0.711	1.19e-31	1.84e-57	1.01566	0.965	0.718	4.39e-53	1.64e-106	1.01317	0.976	0.8	3.91e-102	4.21e-107	0.742229	0.975	0.846	1.01e-102	2.75e-86	0.563979	0.981	0.854	6.57e-82	1.13e-145	0.966726	0.974	0.797	2.7e-141	4.97e-36	6.78e-145
Radial Glia	3	H2AFV	5.48e-63	0.833312	0.893	0.63	1.31e-58	3.67e-62	0.904704	0.897	0.63	8.76e-58	6.12e-127	0.892316	0.959	0.809	1.46e-122	7e-136	0.67551	0.961	0.805	1.67e-131	6.4e-125	0.605073	0.966	0.791	1.53e-120	2.27e-145	0.864787	0.965	0.749	5.41e-141	3.67e-62	1.36e-144
Radial Glia	3	PRKDC	6.61e-31	0.677069	0.831	0.637	1.58e-26	2.31e-29	0.705883	0.774	0.571	5.51e-25	2.2e-113	0.915811	0.949	0.831	5.24e-109	2.44e-145	0.762349	0.95	0.819	5.82e-141	1.9e-113	0.6579	0.956	0.813	4.54e-109	1.08e-123	0.846148	0.937	0.771	2.58e-119	2.31e-29	1.46e-144
Radial Glia	3	DUT	2.63e-32	0.73859	0.657	0.377	6.27e-28	7.17e-30	0.661348	0.647	0.357	1.71e-25	3.45e-109	1.06962	0.953	0.729	8.23e-105	9.62e-91	0.793097	0.906	0.709	2.3e-86	1.3e-100	0.714978	0.923	0.687	3.11e-96	1.7e-143	1.05779	0.912	0.665	4.07e-139	7.17e-30	1.02e-142
Radial Glia	3	ANP32E	2.45e-34	0.701547	0.796	0.572	5.86e-30	4.66e-41	0.718283	0.818	0.547	1.11e-36	1.51e-110	0.919973	0.947	0.67	3.6e-106	5.65e-120	0.707537	0.92	0.643	1.35e-115	1.63e-87	0.517686	0.894	0.644	3.9e-83	1.72e-135	0.896998	0.945	0.656	4.09e-131	2.45e-34	1.03e-134
Radial Glia	3	UBE2S	3.52e-79	1.30815	0.917	0.622	8.41e-75	1.14e-69	1.21301	0.882	0.596	2.73e-65	1.05e-102	0.796066	0.964	0.765	2.52e-98	2.84e-109	0.593379	0.957	0.775	6.78e-105	8.56e-109	0.468539	0.967	0.732	2.04e-104	1.69e-123	0.747769	0.94	0.699	4.04e-119	1.14e-69	1.01e-122
Radial Glia	3	BCYRN1	3.66e-06	1.23375	0.651	0.531	0.087489	1.49e-15	1.24852	0.753	0.598	3.55e-11	2.56e-16	0.652996	0.694	0.555	6.1e-12	3.59e-30	0.402538	0.576	0.37	8.57e-26	1.34e-43	0.285605	0.59	0.347	3.2e-39	7.38e-30	0.686356	0.774	0.638	1.76e-25	3.66e-06	8.05e-43
Radial Glia	4	DLK1	8.4e-209	2.8785	1	0.517	2.01e-204	3.04e-220	2.36098	1	0.63	7.26e-216	3.35e-186	2.66424	1	0.707	8e-182	4.5e-150	1.99155	1	0.738	1.07e-145	3.79e-222	1.56591	1	0.897	9.04e-218	2.35e-261	2.54463	1	0.686	5.6e-257	4.5e-150	1.41e-260
Radial Glia	4	ZIC1	3.05e-216	1.5305	0.769	0.146	7.29e-212	5.56e-53	0.749968	0.68	0.35	1.33e-48	8.56e-12	0.383811	0.571	0.421	2.04e-07	3.39e-30	0.616904	0.791	0.537	8.1e-26	2.57e-81	0.681043	0.894	0.564	6.13e-77	1.49e-31	0.520884	0.699	0.491	3.55e-27	8.56e-12	1.83e-215
Radial Glia	4	DIO3	5.61e-58	0.587583	0.304	0.07	1.34e-53	5.64e-163	1.12373	0.516	0.091	1.35e-158	1.31e-61	0.711584	0.293	0.065	3.12e-57	3.56e-66	0.610557	0.403	0.104	8.51e-62	1.87e-95	1.11752	0.549	0.211	4.45e-91	8.66e-76	0.619787	0.279	0.065	2.07e-71	5.61e-58	3.39e-162
Radial Glia	4	GYPC	8.53e-63	0.835616	0.641	0.277	2.04e-58	8.47e-66	0.888061	0.599	0.268	2.02e-61	2.96e-72	1.07245	0.849	0.509	7.08e-68	1.03e-81	1.25179	0.879	0.585	2.45e-77	2.15e-159	1.1204	0.961	0.722	5.13e-155	4.31e-82	0.95334	0.842	0.526	1.03e-77	8.53e-63	1.29e-158
Radial Glia	4	ZIC4	5.45e-126	0.617791	0.399	0.058	1.3e-121	1.12e-36	0.455838	0.346	0.128	2.68e-32	2.88e-15	0.278082	0.378	0.211	6.88e-11	2.8e-17	0.407343	0.444	0.252	6.69e-13	4.56e-33	0.327452	0.529	0.307	1.09e-28	9.82e-19	0.270403	0.39	0.236	2.34e-14	2.88e-15	3.27e-125
Radial Glia	4	GPC3	1.9e-124	1.05347	0.598	0.14	4.54e-120	3.26e-76	0.700645	0.592	0.216	7.78e-72	1.81e-75	1.02872	0.821	0.433	4.33e-71	2.52e-48	0.922032	0.562	0.251	6.01e-44	2.58e-73	0.7706	0.81	0.509	6.16e-69	7.96e-58	0.70884	0.631	0.341	1.9e-53	2.52e-48	1.14e-123
Radial Glia	4	PDE1A	7.95e-120	0.739816	0.489	0.094	1.9e-115	5.53e-57	0.653009	0.438	0.156	1.32e-52	4.67e-17	0.339265	0.411	0.24	1.12e-12	1.39e-22	0.358942	0.426	0.216	3.32e-18	1.59e-24	0.340031	0.421	0.252	3.79e-20	1.26e-29	0.431936	0.447	0.25	3e-25	4.67e-17	4.77e-119
Radial Glia	4	RPL24	4.53e-43	0.442524	0.997	0.98	1.08e-38	9.85e-37	0.410708	0.998	0.98	2.35e-32	7.64e-51	0.437901	0.985	0.988	1.82e-46	7.05e-83	0.497835	1	0.992	1.68e-78	5.62e-119	0.449312	1	0.995	1.34e-114	1.82e-55	0.384402	0.996	0.984	4.36e-51	9.85e-37	3.37e-118
Radial Glia	4	ZFP36L1	1.18e-20	0.503215	0.783	0.548	2.81e-16	1.82e-24	0.513802	0.786	0.553	4.34e-20	9.23e-64	0.864596	0.944	0.625	2.2e-59	7.57e-33	0.593177	0.918	0.66	1.81e-28	2.38e-36	0.459154	0.944	0.742	5.69e-32	2.24e-96	0.905633	0.936	0.609	5.35e-92	1.18e-20	1.35e-95
Radial Glia	4	CA14	4.61e-47	0.60605	0.587	0.27	1.1e-42	3.02e-24	0.382879	0.452	0.245	7.22e-20	7.64e-19	0.382251	0.635	0.462	1.82e-14	5.42e-55	0.77232	0.724	0.411	1.29e-50	7.65e-92	0.778959	0.838	0.542	1.83e-87	1.55e-28	0.437945	0.566	0.385	3.7e-24	7.64e-19	4.59e-91
Radial Glia	4	C1orf54	1.07e-23	0.463019	0.614	0.387	2.57e-19	2e-18	0.348295	0.571	0.37	4.77e-14	4.07e-26	0.444809	0.719	0.495	9.72e-22	2.23e-29	0.598971	0.712	0.497	5.32e-25	7.76e-82	0.7854	0.891	0.696	1.85e-77	1.48e-29	0.457492	0.629	0.438	3.54e-25	2e-18	4.66e-81
Radial Glia	4	RPL3	4.59e-37	0.437882	0.997	0.985	1.1e-32	3.25e-33	0.415494	0.991	0.98	7.77e-29	2.13e-57	0.491284	0.99	0.989	5.08e-53	9.94e-66	0.515455	1	0.994	2.37e-61	1.29e-81	0.389086	1	0.996	3.08e-77	1.35e-43	0.362166	0.998	0.985	3.23e-39	3.25e-33	7.75e-81
Radial Glia	4	RPS24	9e-29	0.395542	1	0.991	2.15e-24	6.97e-26	0.355427	0.998	0.992	1.66e-21	1.05e-69	0.559233	0.992	0.993	2.5e-65	3.42e-63	0.456073	1	0.994	8.15e-59	1.18e-77	0.366231	1	0.995	2.82e-73	7.04e-64	0.434286	0.998	0.99	1.68e-59	6.97e-26	7.09e-77
Radial Glia	4	RPL6	9.91e-30	0.338281	1	0.993	2.37e-25	1.25e-26	0.313173	0.998	0.992	3e-22	1.88e-55	0.445406	0.99	0.991	4.48e-51	8.64e-63	0.436626	1	0.996	2.06e-58	2.59e-76	0.331214	0.998	0.997	6.18e-72	1.9e-54	0.369203	1	0.988	4.55e-50	1.25e-26	1.55e-75
Radial Glia	4	RPL7A	4.82e-45	0.517775	1	0.978	1.15e-40	8.56e-43	0.475851	0.995	0.983	2.04e-38	3.38e-58	0.485377	0.995	0.988	8.07e-54	8.13e-76	0.556985	1	0.995	1.94e-71	3.37e-75	0.386821	1	0.997	8.05e-71	5.43e-62	0.41135	1	0.987	1.3e-57	8.56e-43	4.88e-75
Radial Glia	4	RFX4	8.3e-54	0.907437	0.774	0.455	1.98e-49	7.75e-67	0.954111	0.772	0.438	1.85e-62	9.93e-46	0.70243	0.834	0.527	2.37e-41	8.92e-37	0.676028	0.735	0.479	2.13e-32	6.6e-46	0.530775	0.785	0.571	1.58e-41	7.08e-75	0.755421	0.846	0.509	1.69e-70	8.92e-37	4.25e-74
Radial Glia	4	RPS14	1.84e-40	0.501043	0.997	0.977	4.39e-36	2.93e-40	0.469624	0.995	0.976	6.99e-36	1.62e-58	0.49729	0.995	0.988	3.87e-54	3.92e-66	0.486533	1	0.995	9.36e-62	1.13e-74	0.357421	1	0.996	2.7e-70	3.47e-70	0.457367	0.998	0.983	8.28e-66	2.93e-40	6.8e-74
Radial Glia	4	NTRK2	1.26e-74	1.15075	0.761	0.346	3e-70	3e-74	0.981385	0.671	0.295	7.17e-70	2.09e-39	0.660622	0.814	0.508	5e-35	2.4e-54	0.884824	0.812	0.463	5.72e-50	7.9e-73	0.697856	0.815	0.504	1.89e-68	1.18e-66	0.874155	0.831	0.518	2.81e-62	2.09e-39	7.55e-74
Radial Glia	4	RPS8	5.91e-27	0.363799	1	0.993	1.41e-22	1.41e-33	0.401359	1	0.993	3.37e-29	6.05e-44	0.469625	0.974	0.983	1.44e-39	4.4e-69	0.460885	1	0.996	1.05e-64	4.28e-72	0.34123	1	0.998	1.02e-67	1.79e-63	0.435244	0.993	0.982	4.26e-59	5.91e-27	2.57e-71
Radial Glia	4	RPL35A	3.83e-24	0.347122	0.997	0.981	9.16e-20	3.34e-26	0.348709	0.995	0.98	7.98e-22	2.07e-49	0.428892	0.992	0.986	4.93e-45	1.02e-57	0.420196	0.997	0.993	2.43e-53	4.92e-71	0.342646	1	0.992	1.18e-66	4.47e-54	0.374395	1	0.982	1.07e-49	3.83e-24	2.95e-70
Radial Glia	4	LINC00473	1.84e-44	0.709603	0.576	0.266	4.39e-40	1.3e-52	0.849509	0.611	0.292	3.11e-48	5.08e-44	0.493603	0.531	0.242	1.21e-39	8.15e-36	0.526075	0.488	0.221	1.95e-31	5.85e-71	0.670146	0.663	0.361	1.4e-66	8.52e-47	0.474721	0.403	0.174	2.03e-42	8.15e-36	3.51e-70
Radial Glia	4	RPL13	3.37e-35	0.431964	1	0.997	8.05e-31	3.71e-37	0.425643	1	0.995	8.86e-33	4.64e-44	0.416033	0.995	0.991	1.11e-39	3.78e-48	0.395004	1	0.997	9.02e-44	1.25e-70	0.32309	1	0.999	2.99e-66	7.74e-49	0.355955	0.998	0.992	1.85e-44	3.37e-35	7.51e-70
Radial Glia	4	RPL29	3.41e-27	0.396285	1	0.979	8.13e-23	1.57e-29	0.389424	0.998	0.981	3.74e-25	6.74e-62	0.519648	0.997	0.988	1.61e-57	1.53e-66	0.537391	1	0.993	3.66e-62	1.71e-68	0.377862	1	0.994	4.09e-64	1.59e-58	0.409307	0.994	0.985	3.8e-54	3.41e-27	1.03e-67
Radial Glia	4	RPS15A	5.24e-26	0.357876	0.995	0.987	1.25e-21	3.71e-26	0.351181	0.998	0.987	8.87e-22	2.07e-47	0.424012	0.99	0.989	4.93e-43	2.64e-62	0.482543	1	0.991	6.3e-58	7.4e-68	0.352593	1	0.994	1.77e-63	8.7e-50	0.365774	0.989	0.985	2.08e-45	5.24e-26	4.44e-67
Radial Glia	4	RPL12	1e-40	0.546939	0.997	0.966	2.4e-36	2.95e-42	0.524043	0.991	0.969	7.04e-38	2.73e-63	0.611775	0.985	0.982	6.52e-59	4.15e-60	0.530212	1	0.991	9.92e-56	1.09e-63	0.389062	0.998	0.992	2.61e-59	9.37e-68	0.488734	0.994	0.979	2.24e-63	1e-40	5.62e-67
Radial Glia	4	RPL5	1.22e-29	0.364579	0.997	0.986	2.9e-25	2.87e-31	0.354788	0.998	0.983	6.85e-27	8.24e-61	0.509894	0.992	0.989	1.97e-56	3.94e-60	0.464088	1	0.993	9.4e-56	1.03e-67	0.352484	1	0.994	2.45e-63	2.19e-66	0.431673	0.996	0.987	5.22e-62	1.22e-29	6.17e-67
Radial Glia	4	RPS27A	2.49e-35	0.409144	1	0.982	5.95e-31	7.59e-30	0.362601	0.998	0.981	1.81e-25	1.3e-55	0.454383	0.99	0.988	3.1e-51	5.22e-43	0.37141	1	0.994	1.25e-38	4.32e-48	0.273733	1	0.995	1.03e-43	1.68e-67	0.424363	0.993	0.983	4.01e-63	7.59e-30	1.01e-66
Radial Glia	4	RPS7	6.46e-29	0.376708	1	0.981	1.54e-24	6.85e-31	0.356441	0.995	0.976	1.64e-26	1.95e-48	0.425443	0.99	0.984	4.65e-44	1.21e-61	0.495883	1	0.992	2.89e-57	4.47e-67	0.361975	1	0.994	1.07e-62	3.93e-51	0.372521	0.998	0.981	9.38e-47	6.46e-29	2.68e-66
Radial Glia	4	RPS18	6.24e-38	0.491228	0.995	0.988	1.49e-33	9.71e-37	0.457821	0.998	0.987	2.32e-32	1.01e-43	0.476807	0.992	0.987	2.4e-39	3.67e-58	0.509381	1	0.994	8.76e-54	9.4e-63	0.353602	1	0.999	2.24e-58	4.8e-49	0.40956	0.996	0.984	1.15e-44	9.71e-37	5.64e-62
Radial Glia	4	RPL39	4.34e-29	0.404471	0.997	0.984	1.04e-24	4.42e-26	0.364191	0.995	0.987	1.05e-21	3.3e-49	0.43483	0.997	0.991	7.89e-45	2.28e-50	0.40998	0.997	0.99	5.44e-46	1.35e-62	0.328106	1	0.99	3.22e-58	1.03e-48	0.367797	0.994	0.986	2.46e-44	4.42e-26	8.08e-62
Radial Glia	4	RPL41	5.52e-51	0.533629	1	0.996	1.32e-46	1.11e-49	0.503832	1	0.994	2.66e-45	1.92e-39	0.413447	1	0.997	4.58e-35	4.45e-62	0.487167	1	0.997	1.06e-57	1.22e-54	0.325388	1	0.998	2.92e-50	2.96e-43	0.349505	1	0.993	7.06e-39	1.92e-39	2.67e-61
Radial Glia	4	NPM1	3.4e-46	0.488677	0.978	0.937	8.11e-42	1.18e-38	0.460646	0.972	0.929	2.82e-34	2.36e-33	0.360821	0.977	0.977	5.63e-29	1.4e-43	0.445695	1	0.973	3.35e-39	1.12e-61	0.376231	0.997	0.983	2.68e-57	6.34e-45	0.361634	0.983	0.971	1.51e-40	2.36e-33	6.72e-61
Radial Glia	4	RPS3A	9.18e-23	0.331281	0.997	0.991	2.19e-18	4.37e-23	0.323659	0.998	0.993	1.04e-18	5.51e-47	0.431492	0.992	0.992	1.32e-42	8.4e-52	0.393004	1	0.996	2.01e-47	1.07e-60	0.303826	1	0.997	2.56e-56	1.72e-45	0.346585	0.998	0.989	4.1e-41	9.18e-23	6.43e-60
Radial Glia	4	NACA	4.74e-32	0.369762	0.995	0.979	1.13e-27	7.67e-34	0.365782	0.991	0.975	1.83e-29	1.96e-54	0.435953	0.982	0.984	4.67e-50	1.92e-52	0.394	0.997	0.991	4.58e-48	4.3e-60	0.304266	1	0.991	1.03e-55	8.38e-51	0.366185	0.996	0.98	2e-46	4.74e-32	2.58e-59
Radial Glia	4	RPL32	1.71e-22	0.334726	0.997	0.988	4.08e-18	2.93e-23	0.328822	1	0.991	6.99e-19	4.06e-30	0.353527	0.995	0.99	9.7e-26	8.42e-53	0.411736	1	0.995	2.01e-48	6.41e-60	0.323929	1	0.995	1.53e-55	4.92e-42	0.330184	0.991	0.988	1.17e-37	1.71e-22	3.85e-59
Radial Glia	4	RPL30	5.14e-24	0.340709	0.997	0.985	1.23e-19	4.97e-17	0.274818	0.991	0.982	1.19e-12	3.84e-46	0.40253	0.995	0.988	9.17e-42	7.58e-54	0.392645	1	0.991	1.81e-49	3.18e-59	0.303337	1	0.993	7.59e-55	6.05e-50	0.354945	0.998	0.983	1.44e-45	4.97e-17	1.91e-58
Radial Glia	4	TTYH1	1.19e-13	0.273444	0.851	0.638	2.84e-09	8.4e-23	0.443323	0.804	0.608	2e-18	3.8e-37	0.63096	0.941	0.721	9.07e-33	4.21e-32	0.584861	0.947	0.719	1e-27	3.3e-34	0.477153	0.938	0.774	7.88e-30	1.27e-57	0.660607	0.963	0.724	3.03e-53	1.19e-13	7.61e-57
Radial Glia	4	PRDX6	7.38e-18	0.396167	0.872	0.729	1.76e-13	5.33e-25	0.448448	0.869	0.683	1.27e-20	1.43e-36	0.540214	0.946	0.816	3.42e-32	1.55e-29	0.458353	0.956	0.828	3.69e-25	4.92e-38	0.36731	0.985	0.888	1.17e-33	2.93e-55	0.606279	0.958	0.796	6.99e-51	7.38e-18	1.76e-54
Radial Glia	4	RPS12	4.08e-30	0.431833	0.995	0.983	9.73e-26	5.27e-35	0.452615	0.993	0.978	1.26e-30	2.64e-52	0.461882	0.985	0.99	6.31e-48	6.41e-55	0.439353	1	0.991	1.53e-50	2.42e-49	0.296007	1	0.995	5.78e-45	1.56e-46	0.348979	0.998	0.985	3.73e-42	4.08e-30	3.84e-54
Radial Glia	4	RPL18	1.17e-20	0.300915	0.992	0.977	2.8e-16	7.38e-20	0.288865	0.984	0.976	1.76e-15	2.61e-36	0.354552	0.98	0.987	6.22e-32	2.27e-54	0.414785	1	0.994	5.42e-50	6.62e-48	0.272794	0.997	0.995	1.58e-43	5e-37	0.304298	0.994	0.984	1.19e-32	7.38e-20	1.36e-53
Radial Glia	4	RPL36	2.31e-24	0.349012	0.986	0.975	5.51e-20	2.23e-24	0.340915	0.993	0.976	5.33e-20	1.2e-38	0.392832	0.982	0.986	2.88e-34	2.49e-45	0.395651	1	0.987	5.94e-41	2.73e-54	0.325612	1	0.99	6.52e-50	6.84e-39	0.334859	0.989	0.978	1.63e-34	2.31e-24	1.64e-53
Radial Glia	4	EEF1A1	7.17e-27	0.288252	1	0.999	1.71e-22	1.3e-24	0.318976	1	0.998	3.09e-20	2.21e-49	0.433893	0.997	0.996	5.28e-45	5.85e-43	0.32628	1	0.999	1.4e-38	1.64e-53	0.279628	1	0.999	3.92e-49	1.29e-45	0.319498	0.998	0.997	3.07e-41	1.3e-24	9.86e-53
Radial Glia	4	SOX2	9.55e-24	0.427539	0.856	0.606	2.28e-19	3.23e-12	0.275639	0.786	0.604	7.71e-08	4.04e-38	0.617265	0.918	0.622	9.64e-34	3.67e-22	0.447182	0.938	0.689	8.77e-18	4.26e-25	0.333853	0.973	0.77	1.02e-20	1.7e-53	0.574205	0.928	0.638	4.05e-49	3.23e-12	1.02e-52
Radial Glia	4	RPS23	1.25e-30	0.390002	1	0.99	2.98e-26	5.75e-29	0.360106	1	0.99	1.37e-24	4.05e-53	0.445065	0.995	0.991	9.67e-49	4.35e-49	0.375863	1	0.996	1.04e-44	1.63e-48	0.272361	1	0.996	3.89e-44	6.9e-46	0.352102	0.994	0.986	1.65e-41	5.75e-29	2.43e-52
Radial Glia	4	RPL19	1.06e-40	0.499823	0.995	0.974	2.53e-36	1.54e-34	0.411145	0.991	0.973	3.68e-30	1.64e-35	0.338737	0.982	0.987	3.92e-31	2.85e-52	0.444107	1	0.992	6.8e-48	6.85e-50	0.303031	1	0.992	1.64e-45	4.26e-35	0.28804	0.989	0.981	1.02e-30	1.54e-34	1.71e-51
Radial Glia	4	RPS6	9.28e-39	0.534374	0.995	0.978	2.22e-34	3.66e-38	0.485055	0.995	0.98	8.75e-34	1.2e-42	0.429265	0.982	0.986	2.86e-38	9.44e-48	0.54253	1	0.993	2.25e-43	3e-52	0.321677	1	0.997	7.15e-48	2.66e-37	0.344266	0.994	0.979	6.35e-33	2.66e-37	1.8e-51
Radial Glia	4	PDE4D	5.64e-44	0.605543	0.514	0.223	1.35e-39	4.14e-52	0.888669	0.569	0.274	9.87e-48	3.83e-16	0.390385	0.663	0.537	9.14e-12	7.8e-15	0.415927	0.515	0.35	1.86e-10	1.19e-42	0.449597	0.609	0.372	2.83e-38	5.89e-22	0.465383	0.616	0.475	1.41e-17	7.8e-15	2.48e-51
Radial Glia	4	RPS27	1.41e-29	0.380965	0.997	0.995	3.37e-25	1.61e-29	0.366037	1	0.994	3.85e-25	9.17e-52	0.472353	0.997	0.992	2.19e-47	2.05e-29	0.30611	1	0.993	4.89e-25	4.97e-50	0.27231	1	0.996	1.19e-45	3.11e-44	0.351869	0.994	0.988	7.42e-40	2.05e-29	5.5e-51
Radial Glia	4	RPS10	2.09e-25	0.396282	0.986	0.93	4.99e-21	1.5e-17	0.323622	0.961	0.914	3.57e-13	1.07e-51	0.50323	0.99	0.967	2.56e-47	1.39e-31	0.432087	0.988	0.92	3.32e-27	9.83e-28	0.282626	0.985	0.942	2.35e-23	7.97e-50	0.404407	0.987	0.962	1.9e-45	1.5e-17	6.44e-51
Radial Glia	4	GNB2L1	1.11e-29	0.413448	0.986	0.965	2.65e-25	1.14e-28	0.403367	0.991	0.964	2.72e-24	5.24e-32	0.364452	0.964	0.983	1.25e-27	1.27e-51	0.468703	1	0.989	3.03e-47	6.25e-49	0.312285	1	0.989	1.49e-44	2.73e-30	0.283565	0.985	0.977	6.52e-26	1.14e-28	7.61e-51
Radial Glia	4	RPS25	2.96e-30	0.371971	0.992	0.976	7.06e-26	3.45e-18	0.280968	0.993	0.976	8.24e-14	1.27e-32	0.333545	0.98	0.982	3.04e-28	2.18e-47	0.418193	1	0.987	5.2e-43	1.31e-51	0.306444	0.998	0.989	3.13e-47	4.56e-37	0.311859	0.985	0.969	1.09e-32	3.45e-18	7.87e-51
Radial Glia	4	RPS3	5.56e-33	0.431754	0.992	0.98	1.33e-28	6.37e-31	0.393109	0.993	0.979	1.52e-26	2.06e-32	0.348306	0.99	0.987	4.91e-28	7.74e-48	0.41876	0.997	0.993	1.85e-43	2.71e-51	0.319266	1	0.995	6.48e-47	8.86e-27	0.254464	0.991	0.985	2.12e-22	8.86e-27	1.63e-50
Radial Glia	4	RPS9	1.06e-33	0.470423	0.986	0.953	2.54e-29	1.45e-33	0.452215	0.982	0.947	3.46e-29	1.93e-28	0.316618	0.987	0.98	4.61e-24	5.04e-38	0.371277	1	0.986	1.2e-33	3.39e-51	0.302674	0.998	0.99	8.1e-47	5.09e-31	0.290828	0.991	0.971	1.21e-26	1.93e-28	2.04e-50
Radial Glia	4	RPL23A	5.51e-51	0.601855	0.986	0.943	1.32e-46	1.02e-40	0.500867	0.979	0.951	2.44e-36	8.73e-34	0.360248	0.985	0.978	2.08e-29	2.3e-23	0.320248	1	0.98	5.49e-19	1.42e-36	0.2973	0.997	0.984	3.39e-32	5.83e-34	0.352907	0.993	0.966	1.39e-29	2.3e-23	3.31e-50
Radial Glia	4	RPL22L1	2.78e-13	0.404806	0.685	0.538	6.64e-09	2.92e-18	0.443102	0.742	0.558	6.97e-14	2.47e-35	0.559919	0.872	0.683	5.89e-31	4.82e-29	0.569414	0.891	0.687	1.15e-24	5.95e-38	0.421726	0.944	0.77	1.42e-33	7.35e-51	0.587415	0.879	0.64	1.76e-46	2.78e-13	4.41e-50
Radial Glia	4	RPL11	6.86e-31	0.372618	0.997	0.989	1.64e-26	9.65e-26	0.330599	0.995	0.987	2.3e-21	5.28e-39	0.349488	0.992	0.993	1.26e-34	2.25e-50	0.401502	1	0.996	5.37e-46	9.79e-48	0.26955	1	0.997	2.34e-43	1.63e-36	0.291304	0.994	0.992	3.9e-32	9.65e-26	1.35e-49
Radial Glia	4	RPL10A	4.57e-33	0.441209	0.992	0.959	1.09e-28	8.48e-35	0.431493	0.991	0.958	2.02e-30	1.53e-40	0.410642	0.98	0.981	3.65e-36	3.62e-37	0.447939	1	0.98	8.65e-33	6.6e-50	0.340576	1	0.984	1.58e-45	2.08e-39	0.349596	0.983	0.972	4.97e-35	4.57e-33	3.96e-49
Radial Glia	4	EIF3E	4.02e-21	0.371478	0.957	0.884	9.6e-17	1.48e-19	0.355824	0.938	0.875	3.54e-15	1.59e-38	0.459856	0.941	0.928	3.8e-34	3.27e-29	0.416359	0.979	0.927	7.81e-25	7.15e-49	0.376221	0.987	0.944	1.71e-44	2.36e-34	0.372984	0.952	0.917	5.64e-30	1.48e-19	4.29e-48
Radial Glia	4	RPL9	9.88e-20	0.287	0.995	0.98	2.36e-15	1.36e-20	0.281088	0.993	0.977	3.24e-16	9.04e-35	0.389888	0.98	0.983	2.16e-30	3.87e-28	0.344961	1	0.989	9.23e-24	1.42e-48	0.320646	1	0.993	3.4e-44	3.75e-29	0.297992	0.989	0.979	8.96e-25	9.88e-20	8.54e-48
Radial Glia	4	RPL7	1.61e-31	0.407492	0.997	0.97	3.85e-27	1.74e-33	0.391349	0.993	0.969	4.16e-29	8.22e-45	0.45727	0.964	0.967	1.96e-40	5.99e-38	0.451996	0.997	0.983	1.43e-33	2.21e-48	0.358898	1	0.989	5.28e-44	9.92e-40	0.391173	0.976	0.967	2.37e-35	1.61e-31	1.33e-47
Radial Glia	4	IFITM2	3.14e-48	0.518915	0.492	0.186	7.5e-44	1.65e-38	0.553593	0.429	0.179	3.94e-34	3.97e-32	0.492176	0.546	0.278	9.48e-28	3.63e-28	0.464665	0.665	0.402	8.66e-24	9.12e-34	0.448526	0.732	0.522	2.18e-29	2.31e-26	0.411721	0.443	0.247	5.52e-22	2.31e-26	1.88e-47
Radial Glia	4	ZIC2	7.57e-48	0.854772	0.541	0.227	1.81e-43	2.25e-24	0.46663	0.594	0.351	5.36e-20	1.85e-35	0.568212	0.862	0.646	4.41e-31	8e-35	0.499301	0.791	0.506	1.91e-30	4.43e-46	0.497951	0.813	0.588	1.06e-41	1.96e-45	0.568715	0.857	0.644	4.68e-41	2.25e-24	4.54e-47
Radial Glia	4	RPS28	4.36e-28	0.379851	0.995	0.98	1.04e-23	1.44e-25	0.347339	0.991	0.974	3.45e-21	4.13e-31	0.318203	0.985	0.985	9.85e-27	1.87e-34	0.356035	0.997	0.988	4.48e-30	3.42e-47	0.28719	1	0.986	8.17e-43	5.84e-39	0.315095	0.994	0.976	1.4e-34	1.44e-25	2.05e-46
Radial Glia	4	RPL26	4.69e-20	0.312452	0.992	0.981	1.12e-15	1.83e-19	0.291142	0.995	0.981	4.37e-15	1.09e-45	0.472006	0.99	0.986	2.59e-41	6.62e-42	0.374225	1	0.99	1.58e-37	1.13e-46	0.289811	1	0.992	2.69e-42	9.95e-47	0.367625	0.993	0.981	2.38e-42	1.83e-19	5.97e-46
Radial Glia	4	CMBL	7.13e-34	0.594108	0.668	0.386	1.7e-29	8.79e-46	0.656979	0.703	0.404	2.1e-41	1.83e-35	0.518424	0.689	0.419	4.37e-31	1.37e-26	0.477713	0.674	0.444	3.28e-22	3.3e-34	0.416407	0.726	0.548	7.89e-30	3.27e-32	0.421321	0.612	0.397	7.81e-28	1.37e-26	5.27e-45
Radial Glia	4	FGFBP3	3.73e-24	0.463136	0.812	0.55	8.91e-20	4.78e-45	0.851702	0.682	0.388	1.14e-40	4.82e-13	0.428506	0.416	0.269	1.15e-08	2.6e-24	0.507492	0.541	0.301	6.2e-20	1.68e-16	0.406933	0.594	0.452	4.01e-12	2.81e-30	0.788168	0.494	0.313	6.7e-26	4.82e-13	2.87e-44
Radial Glia	4	ARL4C	7.66e-26	0.583542	0.755	0.562	1.83e-21	2.22e-28	0.627157	0.733	0.522	5.31e-24	2.3e-40	0.642781	0.893	0.777	5.49e-36	8.05e-31	0.581637	0.865	0.695	1.92e-26	3.2e-44	0.45932	0.902	0.74	7.64e-40	1.67e-37	0.570837	0.851	0.711	3.99e-33	7.66e-26	1.92e-43
Radial Glia	4	TMEM47	2.42e-37	0.541654	0.658	0.351	5.77e-33	4.82e-41	0.501492	0.525	0.249	1.15e-36	8.53e-13	0.291816	0.648	0.469	2.04e-08	3.68e-29	0.531422	0.638	0.398	8.77e-25	8.85e-24	0.301464	0.816	0.65	2.11e-19	1.81e-21	0.332837	0.629	0.447	4.32e-17	8.53e-13	2.89e-40
Radial Glia	4	RPS15	5.98e-29	0.406484	0.997	0.982	1.43e-24	4.26e-25	0.345811	1	0.981	1.02e-20	5.49e-27	0.308196	0.997	0.99	1.31e-22	1.88e-38	0.370868	1	0.995	4.49e-34	8.87e-38	0.259154	1	0.995	2.12e-33	5.9e-41	0.338194	0.991	0.984	1.41e-36	4.26e-25	3.54e-40
Radial Glia	4	NLRP1	8.27e-30	0.627415	0.796	0.564	1.97e-25	1.23e-39	0.815084	0.765	0.522	2.94e-35	1.61e-13	0.394006	0.923	0.844	3.83e-09	9.18e-10	0.297148	0.826	0.724	2.19e-05	1.45e-12	0.295047	0.842	0.774	3.47e-08	1.18e-17	0.366277	0.926	0.862	2.81e-13	9.18e-10	7.4e-39
Radial Glia	4	QPRT	2.28e-38	0.539096	0.633	0.342	5.43e-34	1.42e-12	0.299347	0.505	0.352	3.38e-08	3.81e-29	0.463537	0.763	0.52	9.09e-25	7.77e-15	0.397295	0.724	0.569	1.86e-10	2.96e-33	0.426587	0.815	0.666	7.06e-29	1.04e-20	0.346976	0.688	0.516	2.48e-16	1.42e-12	1.37e-37
Radial Glia	4	RPS5	7.43e-21	0.358039	0.984	0.954	1.77e-16	9.84e-29	0.374274	0.984	0.957	2.35e-24	1.03e-22	0.264713	0.969	0.979	2.47e-18	4.62e-38	0.388526	1	0.987	1.1e-33	6.58e-34	0.255553	0.997	0.988	1.57e-29	3.87e-24	0.261449	0.987	0.974	9.24e-20	7.43e-21	2.77e-37
Radial Glia	4	RPS29	2.68e-27	0.380514	0.995	0.98	6.39e-23	5.08e-23	0.328721	0.993	0.979	1.21e-18	4.62e-30	0.342441	0.98	0.98	1.1e-25	2.43e-30	0.343879	1	0.982	5.81e-26	9.54e-37	0.294914	1	0.98	2.28e-32	4.54e-32	0.314878	0.987	0.973	1.08e-27	5.08e-23	5.73e-36
Radial Glia	4	RPL31	1.04e-17	0.317487	0.986	0.957	2.48e-13	6.05e-17	0.298037	0.979	0.962	1.45e-12	9.83e-37	0.439246	0.957	0.96	2.35e-32	5.05e-18	0.337844	1	0.969	1.21e-13	5.59e-27	0.306911	0.998	0.976	1.34e-22	4.97e-25	0.321554	0.969	0.949	1.19e-20	6.05e-17	5.9e-36
Radial Glia	4	RPSA	1.15e-29	0.422533	0.984	0.938	2.74e-25	3.41e-32	0.404225	0.986	0.941	8.15e-28	1.29e-20	0.263144	0.967	0.975	3.07e-16	8.9e-29	0.332597	0.997	0.981	2.12e-24	1.61e-35	0.273628	1	0.983	3.84e-31	2.85e-29	0.303396	0.983	0.96	6.79e-25	1.29e-20	9.64e-35
Radial Glia	4	PON2	1.45e-33	0.460004	0.543	0.265	3.45e-29	1.26e-26	0.51662	0.521	0.293	3.01e-22	6.42e-17	0.343753	0.849	0.627	1.53e-12	3.2e-21	0.44226	0.762	0.564	7.64e-17	1.16e-25	0.389453	0.751	0.597	2.76e-21	9.28e-22	0.326133	0.835	0.643	2.22e-17	6.42e-17	8.67e-33
Radial Glia	4	RPL37A	1.02e-21	0.318089	1	0.995	2.43e-17	1.07e-27	0.33482	1	0.992	2.56e-23	2.86e-33	0.361592	0.99	0.989	6.83e-29	2.07e-18	0.28165	1	0.993	4.95e-14	1.02e-30	0.270488	0.998	0.994	2.43e-26	8e-20	0.25059	0.994	0.985	1.91e-15	2.07e-18	1.72e-32
Radial Glia	4	RPL13A	7.49e-23	0.345982	1	0.989	1.79e-18	3.23e-32	0.392475	1	0.989	7.7e-28	3.11e-29	0.374674	0.977	0.978	7.44e-25	1.08e-11	0.250836	1	0.99	2.59e-07	4.59e-22	0.284933	1	0.993	1.1e-17	4.94e-21	0.33092	0.987	0.97	1.18e-16	1.08e-11	1.94e-31
Radial Glia	4	RPL23	6.07e-23	0.347472	0.989	0.974	1.45e-18	4.16e-29	0.381524	0.995	0.974	9.92e-25	3.15e-22	0.417068	0.967	0.967	7.52e-18	1.41e-20	0.40585	1	0.981	3.37e-16	1.07e-28	0.325543	0.997	0.988	2.56e-24	9.76e-24	0.35716	0.982	0.963	2.33e-19	1.41e-20	2.49e-28
Radial Glia	4	RPL27A	7.32e-20	0.3299	0.989	0.967	1.75e-15	5.3e-28	0.350052	0.984	0.972	1.27e-23	1.64e-25	0.425401	0.964	0.967	3.91e-21	1.24e-12	0.263306	0.994	0.977	2.95e-08	4.36e-25	0.315023	0.998	0.985	1.04e-20	1.08e-18	0.307904	0.967	0.949	2.57e-14	1.24e-12	3.18e-27
Radial Glia	4	RPL36A	3.46e-25	0.406201	0.981	0.937	8.26e-21	4.63e-21	0.344768	0.956	0.925	1.11e-16	1.08e-24	0.400779	0.952	0.958	2.58e-20	3.44e-16	0.317552	0.935	0.846	8.21e-12	3.38e-23	0.293878	0.961	0.892	8.06e-19	1.86e-17	0.250052	0.965	0.95	4.44e-13	3.44e-16	2.08e-24
Radial Glia	4	GPM6B	2.01e-17	0.413009	0.698	0.51	4.79e-13	9.33e-25	0.53717	0.703	0.487	2.23e-20	4.31e-16	0.342768	0.908	0.803	1.03e-11	1.73e-10	0.30725	0.759	0.631	4.14e-06	3.91e-15	0.263526	0.8	0.671	9.34e-11	5.66e-17	0.294191	0.893	0.793	1.35e-12	1.73e-10	5.6e-24
Radial Glia	5	PCNA	1.14e-47	1.10797	0.639	0.237	2.72e-43	2.65e-41	0.869443	0.545	0.233	6.31e-37	7.58e-95	1.4166	0.879	0.422	1.81e-90	1.33e-205	1.22086	0.903	0.442	3.19e-201	2.67e-223	1.27227	0.891	0.491	6.38e-219	2.73e-148	1.40162	0.894	0.381	6.53e-144	2.65e-41	1.6e-222
Radial Glia	5	CLSPN	9.74e-129	1.2449	0.653	0.107	2.32e-124	2.24e-120	1.13933	0.606	0.124	5.35e-116	1.58e-124	1.28784	0.815	0.222	3.78e-120	2.89e-213	1.05196	0.785	0.262	6.89e-209	5.94e-179	0.90005	0.705	0.269	1.42e-174	5.35e-219	1.41665	0.867	0.212	1.28e-214	2.24e-120	3.21e-218
Radial Glia	5	CDC6	9.85e-105	0.475259	0.381	0.04	2.35e-100	4.34e-64	0.517387	0.285	0.047	1.04e-59	2.24e-136	0.941423	0.605	0.106	5.34e-132	2.7e-182	0.753226	0.535	0.129	6.45e-178	1.85e-181	0.6744	0.475	0.116	4.43e-177	2.57e-208	0.967543	0.625	0.105	6.14e-204	4.34e-64	1.54e-207
Radial Glia	5	GMNN	1.19e-51	0.847734	0.619	0.203	2.83e-47	2.7e-63	0.894432	0.588	0.199	6.46e-59	1.04e-110	1.23064	0.887	0.323	2.48e-106	1.72e-198	1.06568	0.887	0.384	4.11e-194	1.2e-160	0.891781	0.803	0.395	2.87e-156	1.42e-151	1.17013	0.856	0.299	3.38e-147	1.19e-51	1.03e-197
Radial Glia	5	TYMS	1.72e-72	1.14266	0.767	0.249	4.11e-68	7.38e-81	1.02452	0.679	0.221	1.76e-76	9.35e-110	1.54354	0.919	0.355	2.23e-105	2.31e-198	1.16265	0.946	0.437	5.52e-194	9.26e-176	1.05205	0.903	0.491	2.21e-171	2.02e-153	1.55617	0.919	0.379	4.82e-149	1.72e-72	1.39e-197
Radial Glia	5	FAM111B	6.01e-90	0.54443	0.332	0.036	1.44e-85	4.02e-109	0.641316	0.318	0.034	9.6e-105	2.47e-108	0.796882	0.544	0.103	5.89e-104	2.27e-194	0.745807	0.556	0.13	5.41e-190	4.34e-195	0.780921	0.501	0.121	1.04e-190	3.83e-183	0.924909	0.575	0.099	9.15e-179	6.01e-90	2.61e-194
Radial Glia	5	GINS2	2.88e-99	1.06641	0.658	0.139	6.88e-95	1.55e-113	1.05768	0.596	0.131	3.71e-109	4.56e-106	1.41902	0.843	0.309	1.09e-101	3.7e-192	1.08878	0.85	0.379	8.83e-188	4.17e-187	1.00752	0.809	0.382	9.96e-183	1.67e-189	1.55101	0.889	0.294	3.99e-185	2.88e-99	2.22e-191
Radial Glia	5	DTL	3.04e-125	0.657049	0.391	0.035	7.26e-121	1.02e-96	0.51329	0.296	0.034	2.43e-92	2.52e-148	0.830954	0.609	0.096	6.03e-144	6.96e-191	0.673978	0.55	0.13	1.66e-186	9.22e-160	0.59735	0.455	0.118	2.2e-155	9.7e-171	0.740048	0.533	0.09	2.31e-166	1.02e-96	4.18e-190
Radial Glia	5	MCM6	2.96e-44	0.605007	0.366	0.084	7.06e-40	3.81e-33	0.517549	0.278	0.079	9.1e-29	8.81e-76	0.846229	0.629	0.193	2.1e-71	1.01e-184	0.863203	0.693	0.23	2.42e-180	9.81e-175	0.810382	0.672	0.259	2.34e-170	1.04e-167	1.04485	0.733	0.187	2.48e-163	3.81e-33	6.09e-184
Radial Glia	5	CENPU	2.92e-88	0.878913	0.634	0.135	6.96e-84	7.84e-84	0.854355	0.549	0.136	1.87e-79	2.92e-138	1.25204	0.863	0.222	6.97e-134	3.65e-182	0.951623	0.798	0.291	8.71e-178	1.59e-140	0.751856	0.682	0.284	3.8e-136	2.6e-184	1.17093	0.842	0.22	6.22e-180	7.84e-84	1.56e-183
Radial Glia	5	ATAD2	4.51e-90	1.0722	0.584	0.116	1.08e-85	1.07e-86	1.03555	0.563	0.144	2.55e-82	2.26e-120	1.14675	0.758	0.191	5.4e-116	2.06e-183	0.915027	0.736	0.246	4.91e-179	5.25e-140	0.734009	0.605	0.23	1.25e-135	1.14e-165	1.01532	0.725	0.174	2.72e-161	1.07e-86	1.23e-182
Radial Glia	5	HELLS	8.61e-88	1.52568	0.847	0.293	2.06e-83	3.88e-86	1.48154	0.755	0.292	9.27e-82	1.58e-106	1.4753	0.875	0.33	3.77e-102	1.6e-170	1.05958	0.856	0.393	3.82e-166	3.1e-183	1.02901	0.8	0.37	7.4e-179	1.32e-141	1.30892	0.831	0.309	3.14e-137	3.88e-86	1.86e-182
Radial Glia	5	NASP	1.47e-50	1.27888	0.96	0.603	3.52e-46	5.29e-56	1.17354	0.866	0.555	1.26e-51	9.79e-88	1.20213	0.992	0.895	2.34e-83	4.75e-173	1.02703	0.992	0.861	1.13e-168	4.74e-183	0.97244	0.978	0.855	1.13e-178	1.74e-109	1.14819	0.986	0.867	4.16e-105	1.47e-50	2.84e-182
Radial Glia	5	MCM4	4.03e-147	1.34563	0.703	0.11	9.62e-143	5.06e-167	1.24901	0.61	0.094	1.21e-162	2.02e-109	1.23654	0.75	0.221	4.82e-105	3.03e-176	0.973671	0.736	0.273	7.23e-172	2.54e-181	0.90718	0.662	0.241	6.07e-177	9.53e-164	1.09967	0.742	0.194	2.28e-159	2.02e-109	1.53e-180
Radial Glia	5	MCM5	4.86e-45	0.491426	0.322	0.064	1.16e-40	7.04e-50	0.383572	0.256	0.048	1.68e-45	1.74e-99	0.96317	0.714	0.205	4.16e-95	3.56e-181	0.822034	0.669	0.218	8.49e-177	4.86e-176	0.825996	0.625	0.219	1.16e-171	3.71e-159	1.05735	0.722	0.192	8.85e-155	4.86e-45	2.13e-180
Radial Glia	5	KIAA0101	5.52e-87	1.50167	0.738	0.202	1.32e-82	3.98e-72	1.30099	0.639	0.217	9.51e-68	3.05e-119	1.63884	0.883	0.271	7.27e-115	1e-175	1.199	0.832	0.338	2.39e-171	2.71e-160	1.12177	0.773	0.349	6.47e-156	2.27e-175	1.67448	0.878	0.273	5.42e-171	3.98e-72	6.02e-175
Radial Glia	5	MCM3	1.71e-71	0.755418	0.5	0.104	4.08e-67	2.92e-91	0.877066	0.477	0.099	6.96e-87	2.22e-104	1.212	0.786	0.263	5.3e-100	1.94e-174	0.876239	0.733	0.273	4.63e-170	1.83e-147	0.723697	0.657	0.272	4.37e-143	2.77e-162	1.22793	0.811	0.259	6.61e-158	1.71e-71	1.16e-173
Radial Glia	5	MCM10	1.37e-107	0.627015	0.421	0.048	3.27e-103	1.44e-95	0.855158	0.365	0.053	3.43e-91	6.75e-127	0.848979	0.625	0.118	1.61e-122	9.11e-160	0.742077	0.569	0.162	2.18e-155	3.38e-113	0.549576	0.449	0.147	8.06e-109	3.73e-173	0.960767	0.603	0.115	8.91e-169	1.44e-95	2.24e-172
Radial Glia	5	ORC6	1.01e-59	0.846172	0.658	0.204	2.41e-55	1.13e-52	0.756752	0.57	0.208	2.71e-48	5.58e-104	1.09436	0.895	0.319	1.33e-99	4.76e-162	0.953888	0.819	0.356	1.14e-157	7.8e-137	0.799931	0.777	0.38	1.86e-132	6.81e-140	1.18191	0.856	0.314	1.63e-135	1.13e-52	2.86e-161
Radial Glia	5	DEK	1.58e-58	1.22026	0.946	0.707	3.78e-54	1.2e-60	1.17498	0.899	0.714	2.86e-56	7.36e-93	1.34677	0.972	0.823	1.76e-88	1.94e-160	0.971052	0.977	0.829	4.63e-156	4.04e-148	0.865282	0.957	0.806	9.64e-144	4.61e-114	1.21527	0.969	0.779	1.1e-109	1.58e-58	1.16e-159
Radial Glia	5	FEN1	3.34e-35	0.437209	0.317	0.078	7.98e-31	6.96e-27	0.402622	0.278	0.089	1.66e-22	7.36e-95	1.18981	0.806	0.301	1.76e-90	2.22e-160	0.857049	0.736	0.287	5.31e-156	3.38e-153	0.795498	0.685	0.29	8.07e-149	1.79e-143	1.14816	0.797	0.264	4.27e-139	6.96e-27	1.33e-159
Radial Glia	5	MCM7	1.31e-22	0.564641	0.604	0.298	3.13e-18	3.97e-21	0.581584	0.473	0.242	9.47e-17	6.11e-85	1.30783	0.911	0.498	1.46e-80	2.41e-156	0.947195	0.914	0.495	5.76e-152	2.74e-154	0.912378	0.866	0.497	6.53e-150	1.38e-112	1.2133	0.889	0.477	3.3e-108	3.97e-21	1.45e-155
Radial Glia	5	E2F1	3.68e-79	0.404829	0.302	0.033	8.79e-75	1.88e-76	0.417299	0.256	0.032	4.48e-72	4.16e-118	0.845151	0.605	0.119	9.94e-114	3.02e-139	0.53563	0.47	0.122	7.2e-135	7.52e-117	0.506842	0.415	0.125	1.79e-112	5.74e-153	0.749927	0.592	0.121	1.37e-148	1.88e-76	3.44e-152
Radial Glia	5	CHEK1	6.79e-94	1.00499	0.688	0.159	1.62e-89	5.67e-98	1.03738	0.606	0.152	1.35e-93	1.52e-85	1.03708	0.81	0.319	3.62e-81	2.64e-149	0.827437	0.785	0.339	6.3e-145	6.31e-108	0.661421	0.675	0.342	1.51e-103	2.3e-122	1.00898	0.794	0.289	5.49e-118	1.52e-85	1.58e-148
Radial Glia	5	CENPK	1.17e-85	0.820553	0.545	0.104	2.79e-81	7.77e-75	0.695324	0.433	0.093	1.85e-70	2.53e-98	0.850014	0.706	0.19	6.04e-94	1.61e-119	0.670535	0.662	0.258	3.84e-115	7.42e-97	0.612182	0.589	0.262	1.77e-92	2.56e-144	0.829653	0.719	0.185	6.12e-140	7.77e-75	1.54e-143
Radial Glia	5	CHAF1A	1.66e-80	0.534988	0.416	0.063	3.97e-76	6.31e-72	0.559764	0.325	0.056	1.51e-67	6.92e-107	0.884793	0.665	0.158	1.65e-102	1.04e-138	0.647973	0.606	0.202	2.47e-134	4.88e-104	0.50737	0.511	0.195	1.17e-99	1.64e-128	0.803968	0.611	0.153	3.92e-124	6.31e-72	6.22e-138
Radial Glia	5	RAD51AP1	1.33e-84	0.721288	0.49	0.083	3.17e-80	1.37e-60	0.583794	0.379	0.085	3.28e-56	6.59e-87	0.747495	0.661	0.171	1.57e-82	1.76e-75	0.455549	0.514	0.207	4.21e-71	2.43e-62	0.423541	0.478	0.221	5.81e-58	5.3e-133	0.899791	0.656	0.162	1.26e-128	1.37e-60	3.18e-132
Radial Glia	5	UNG	9.68e-36	0.499144	0.485	0.16	2.31e-31	8.75e-42	0.611297	0.401	0.132	2.09e-37	1.01e-55	0.784611	0.706	0.324	2.42e-51	9.88e-128	0.714358	0.677	0.282	2.36e-123	5.6e-133	0.692637	0.622	0.259	1.34e-128	3.89e-76	0.833139	0.683	0.292	9.28e-72	9.68e-36	3.36e-132
Radial Glia	5	RFC2	2.48e-44	0.477281	0.411	0.103	5.91e-40	7.44e-42	0.435265	0.354	0.101	1.78e-37	9.48e-50	0.782376	0.694	0.337	2.26e-45	6.79e-133	0.754165	0.746	0.321	1.62e-128	2.81e-114	0.729936	0.663	0.326	6.71e-110	1.05e-89	0.878274	0.714	0.298	2.51e-85	7.44e-42	4.08e-132
Radial Glia	5	ZWINT	1.15e-57	0.293309	0.317	0.049	2.74e-53	4.72e-62	0.475086	0.3	0.053	1.13e-57	2.51e-93	0.827455	0.706	0.19	5.99e-89	3.19e-91	0.533323	0.542	0.207	7.61e-87	1.51e-75	0.486156	0.503	0.227	3.61e-71	7.34e-132	0.815864	0.675	0.175	1.75e-127	1.15e-57	4.41e-131
Radial Glia	5	MCM2	1.98e-56	0.587495	0.381	0.073	4.73e-52	1.09e-49	0.391589	0.278	0.056	2.6e-45	4.31e-96	0.766634	0.637	0.161	1.03e-91	2.46e-130	0.556508	0.533	0.166	5.87e-126	3.14e-77	0.470376	0.432	0.178	7.5e-73	1.33e-112	0.764918	0.594	0.162	3.17e-108	1.09e-49	1.48e-129
Radial Glia	5	RFC4	2.68e-45	0.675941	0.55	0.174	6.4e-41	4.95e-29	0.541603	0.43	0.178	1.18e-24	2.32e-74	0.886755	0.81	0.342	5.55e-70	4.02e-129	0.744412	0.793	0.38	9.59e-125	3.18e-129	0.750477	0.717	0.364	7.59e-125	1.67e-107	0.875477	0.767	0.295	3.99e-103	4.95e-29	1.91e-128
Radial Glia	5	DNAJC9	4.19e-64	0.779929	0.678	0.201	1e-59	2.87e-58	0.799933	0.52	0.162	6.85e-54	2.19e-68	0.87213	0.815	0.37	5.23e-64	5.97e-129	0.740959	0.804	0.383	1.43e-124	2.17e-96	0.674788	0.695	0.376	5.17e-92	3.14e-96	0.880714	0.781	0.328	7.51e-92	2.87e-58	3.58e-128
Radial Glia	5	CDT1	9.24e-38	0.373643	0.401	0.106	2.21e-33	7.43e-36	0.455829	0.35	0.108	1.77e-31	2.63e-94	0.897521	0.722	0.211	6.27e-90	4.32e-113	0.570396	0.612	0.229	1.03e-108	2.64e-82	0.549436	0.558	0.265	6.31e-78	1.19e-123	0.864823	0.689	0.199	2.84e-119	7.43e-36	7.13e-123
Radial Glia	5	RNASEH2A	1.06e-47	0.533123	0.49	0.132	2.53e-43	8.03e-42	0.500861	0.404	0.127	1.92e-37	1.24e-76	0.96824	0.827	0.36	2.97e-72	1.27e-116	0.695262	0.808	0.385	3.04e-112	4.59e-80	0.6112	0.69	0.4	1.1e-75	4.52e-107	0.991305	0.814	0.334	1.08e-102	8.03e-42	7.65e-116
Radial Glia	5	RMI2	6.04e-73	0.421052	0.322	0.041	1.44e-68	2.94e-85	0.425007	0.285	0.036	7.01e-81	1.21e-63	0.528075	0.488	0.128	2.89e-59	5.58e-113	0.474526	0.5	0.161	1.33e-108	7.53e-87	0.46139	0.441	0.169	1.8e-82	3.09e-116	0.710624	0.522	0.121	7.39e-112	1.21e-63	1.86e-115
Radial Glia	5	DUT	8.15e-59	1.18882	0.837	0.377	1.95e-54	9.86e-44	1.10752	0.679	0.358	2.35e-39	9.15e-58	1.20282	0.923	0.738	2.18e-53	9.88e-116	0.982866	0.914	0.713	2.36e-111	2.16e-101	0.8726	0.874	0.695	5.15e-97	8.56e-82	1.1279	0.914	0.672	2.04e-77	9.86e-44	5.93e-115
Radial Glia	5	USP1	1.17e-36	0.732235	0.663	0.286	2.79e-32	2.12e-30	0.653609	0.578	0.284	5.05e-26	3.31e-66	0.979926	0.815	0.4	7.91e-62	6.83e-115	0.827597	0.819	0.44	1.63e-110	3.12e-105	0.728818	0.727	0.405	7.44e-101	1.06e-108	1.00818	0.844	0.366	2.54e-104	2.12e-30	4.1e-114
Radial Glia	5	SNRPB	1.98e-17	0.461587	0.812	0.548	4.73e-13	2.52e-18	0.534549	0.693	0.493	6.03e-14	1.3e-65	0.933181	0.96	0.795	3.1e-61	7.49e-114	0.766357	0.967	0.8	1.79e-109	4.13e-93	0.574087	0.952	0.843	9.86e-89	5.55e-87	0.905468	0.956	0.748	1.33e-82	1.98e-17	4.49e-113
Radial Glia	5	RPA3	6.84e-32	0.626001	0.688	0.335	1.63e-27	1.88e-19	0.552514	0.552	0.333	4.5e-15	1.91e-56	0.898618	0.863	0.53	4.55e-52	4.24e-112	0.75098	0.879	0.539	1.01e-107	1.72e-98	0.691662	0.834	0.57	4.11e-94	9.48e-91	0.933672	0.869	0.466	2.26e-86	1.88e-19	2.54e-111
Radial Glia	5	H2AFZ	4.33e-15	0.477514	0.931	0.79	1.03e-10	1.38e-13	0.486591	0.863	0.774	3.3e-09	5.84e-77	1.04559	0.996	0.962	1.39e-72	9.14e-101	0.621267	0.989	0.964	2.18e-96	5.12e-108	0.626237	0.988	0.95	1.22e-103	1.97e-104	1.02026	0.989	0.948	4.7e-100	1.38e-13	3.07e-107
Radial Glia	5	RANBP1	4.15e-32	0.762587	0.906	0.657	9.9e-28	1.19e-33	0.80222	0.823	0.619	2.84e-29	2.02e-61	0.873735	0.968	0.866	4.83e-57	1.6e-107	0.766039	0.959	0.842	3.82e-103	1.02e-103	0.651122	0.944	0.837	2.44e-99	3.17e-71	0.820652	0.947	0.817	7.58e-67	4.15e-32	9.61e-107
Radial Glia	5	MSH6	1.22e-11	0.371608	0.55	0.325	2.9e-07	1.93e-12	0.46051	0.516	0.339	4.62e-08	2.26e-48	0.91781	0.819	0.51	5.39e-44	4.81e-105	0.773849	0.822	0.505	1.15e-100	2.25e-85	0.664541	0.743	0.482	5.37e-81	1.04e-60	0.820156	0.8	0.469	2.47e-56	1.22e-11	2.89e-104
Radial Glia	5	DCTPP1	2.37e-20	0.395507	0.505	0.234	5.67e-16	2.56e-24	0.53503	0.487	0.243	6.1e-20	2.37e-11	0.375054	0.444	0.287	5.66e-07	2.97e-100	0.770717	0.837	0.528	7.08e-96	3.74e-88	0.640201	0.803	0.548	8.93e-84	3.28e-13	0.377531	0.419	0.271	7.84e-09	2.37e-11	1.78e-99
Radial Glia	5	RRM1	1.02e-49	0.802891	0.639	0.225	2.44e-45	9.07e-42	0.760652	0.509	0.203	2.17e-37	5.22e-58	0.889286	0.798	0.407	1.24e-53	5.41e-100	0.605439	0.779	0.392	1.29e-95	2.02e-94	0.630186	0.716	0.394	4.82e-90	1.14e-99	0.947622	0.831	0.37	2.73e-95	9.07e-42	3.25e-99
Radial Glia	5	RPA2	3.37e-29	0.610867	0.599	0.268	8.03e-25	3.16e-24	0.571271	0.48	0.24	7.54e-20	2.6e-50	0.803124	0.839	0.487	6.2e-46	6.05e-94	0.673957	0.792	0.465	1.44e-89	2.32e-99	0.642827	0.768	0.464	5.54e-95	6.97e-75	0.89051	0.8	0.44	1.66e-70	3.16e-24	1.39e-98
Radial Glia	5	DHFR	1.26e-63	0.774638	0.535	0.13	3.01e-59	1.08e-74	0.812478	0.491	0.122	2.57e-70	8.61e-81	1.10262	0.782	0.296	2.06e-76	1.12e-97	0.722866	0.686	0.327	2.66e-93	1.1e-72	0.624686	0.606	0.329	2.62e-68	6.07e-88	0.999489	0.697	0.276	1.45e-83	1.26e-63	6.69e-97
Radial Glia	5	ATAD5	3.2e-54	0.748227	0.663	0.213	7.65e-50	3.24e-57	0.798829	0.567	0.196	7.73e-53	1.53e-73	0.841537	0.673	0.221	3.66e-69	3.75e-96	0.559103	0.636	0.272	8.94e-92	4.73e-84	0.531263	0.559	0.267	1.13e-79	1.04e-72	0.661979	0.594	0.218	2.49e-68	3.2e-54	2.25e-95
Radial Glia	5	CTNNAL1	1.28e-18	0.510783	0.649	0.366	3.07e-14	2.51e-27	0.639352	0.621	0.346	5.98e-23	9.51e-51	0.778196	0.734	0.362	2.27e-46	2.07e-95	0.661721	0.77	0.428	4.95e-91	3.08e-73	0.560162	0.677	0.413	7.35e-69	2.39e-78	0.771744	0.711	0.308	5.7e-74	1.28e-18	1.24e-94
Radial Glia	5	SNRPD1	1.23e-15	0.453929	0.886	0.732	2.93e-11	9.9e-13	0.356101	0.809	0.691	2.36e-08	2.17e-39	0.612297	0.956	0.896	5.17e-35	2.39e-94	0.58321	0.971	0.878	5.71e-90	3.47e-78	0.542536	0.954	0.884	8.29e-74	6.12e-58	0.668648	0.953	0.863	1.46e-53	9.9e-13	1.44e-93
Radial Glia	5	C19orf48	1.27e-25	0.484306	0.574	0.258	3.02e-21	5.33e-16	0.302442	0.419	0.219	1.27e-11	1.7e-59	0.905878	0.847	0.491	4.07e-55	6.14e-93	0.692118	0.802	0.466	1.47e-88	2.03e-87	0.614812	0.804	0.54	4.84e-83	1.21e-81	0.845483	0.842	0.449	2.88e-77	5.33e-16	3.69e-92
Radial Glia	5	DNMT1	1.4e-42	0.786039	0.713	0.297	3.35e-38	2.12e-34	0.661551	0.556	0.262	5.06e-30	8.66e-47	0.82872	0.835	0.52	2.07e-42	8.48e-92	0.685814	0.85	0.52	2.03e-87	2.75e-72	0.587856	0.748	0.49	6.56e-68	7.49e-63	0.833964	0.803	0.476	1.79e-58	2.12e-34	5.09e-91
Radial Glia	5	POLD3	2.25e-23	0.432627	0.416	0.158	5.38e-19	7.5e-36	0.617771	0.39	0.134	1.79e-31	3.84e-47	0.695931	0.698	0.33	9.18e-43	2.34e-91	0.62498	0.683	0.336	5.59e-87	4e-89	0.553204	0.631	0.324	9.54e-85	2.45e-72	0.807835	0.697	0.312	5.86e-68	2.25e-23	1.4e-90
Radial Glia	5	BARD1	5.87e-35	0.60484	0.53	0.186	1.4e-30	1.82e-20	0.429629	0.43	0.208	4.35e-16	1.13e-74	0.682525	0.726	0.245	2.69e-70	6.45e-82	0.544664	0.586	0.261	1.54e-77	5.21e-71	0.499753	0.532	0.263	1.24e-66	4.55e-90	0.639974	0.653	0.221	1.09e-85	1.82e-20	2.73e-89
Radial Glia	5	METRN	6.95e-18	0.598829	0.703	0.452	1.66e-13	2.67e-23	0.683137	0.704	0.457	6.37e-19	1.99e-34	0.691733	0.927	0.746	4.75e-30	4.69e-90	0.744346	0.934	0.718	1.12e-85	2.84e-82	0.644953	0.91	0.75	6.77e-78	2.25e-52	0.72549	0.939	0.712	5.38e-48	6.95e-18	2.81e-89
Radial Glia	5	CENPH	1.65e-62	0.87448	0.713	0.237	3.95e-58	8.42e-60	0.876178	0.614	0.22	2.01e-55	7.22e-60	0.75345	0.722	0.272	1.72e-55	1.3e-88	0.617287	0.758	0.381	3.11e-84	5.27e-58	0.435854	0.672	0.394	1.26e-53	7.49e-65	0.625415	0.656	0.265	1.79e-60	5.27e-58	7.83e-88
Radial Glia	5	PXMP2	4.32e-35	0.45739	0.485	0.157	1.03e-30	8.45e-51	0.603089	0.444	0.13	2.02e-46	7.44e-49	0.775515	0.815	0.454	1.78e-44	1.97e-63	0.489956	0.684	0.374	4.7e-59	6.33e-40	0.33863	0.512	0.307	1.51e-35	3.15e-87	0.890206	0.817	0.382	7.52e-83	4.32e-35	1.89e-86
Radial Glia	5	BRCA1	4.06e-56	0.585	0.421	0.09	9.7e-52	6.71e-65	0.488601	0.39	0.086	1.6e-60	1.62e-62	0.599318	0.548	0.162	3.86e-58	2.64e-74	0.422808	0.459	0.175	6.31e-70	1.91e-65	0.473029	0.418	0.183	4.55e-61	3.16e-87	0.580389	0.531	0.153	7.54e-83	4.06e-56	1.9e-86
Radial Glia	5	UBE2T	5.58e-60	0.716632	0.639	0.182	1.33e-55	3.24e-25	0.520021	0.39	0.158	7.73e-21	7.28e-42	0.532014	0.601	0.237	1.74e-37	2.09e-85	0.58479	0.755	0.384	4.99e-81	4.17e-68	0.508172	0.669	0.37	9.95e-64	5.73e-66	0.493304	0.608	0.218	1.37e-61	3.24e-25	1.25e-84
Radial Glia	5	HMGN2	4.25e-37	0.747491	0.96	0.825	1.02e-32	5.01e-27	0.573413	0.913	0.808	1.2e-22	2.11e-52	0.793479	0.984	0.958	5.05e-48	1.88e-84	0.567179	0.988	0.932	4.5e-80	2.28e-52	0.354694	0.989	0.957	5.45e-48	1.62e-68	0.680348	0.994	0.954	3.86e-64	5.01e-27	1.13e-83
Radial Glia	5	TUBA1B	8.56e-34	0.834754	0.95	0.815	2.04e-29	6.58e-30	0.715468	0.917	0.849	1.57e-25	1.03e-58	0.85141	0.996	0.976	2.45e-54	6.16e-79	0.541069	0.994	0.971	1.47e-74	9.3e-70	0.448022	0.985	0.97	2.22e-65	6.28e-82	0.805948	0.994	0.973	1.5e-77	6.58e-30	3.77e-81
Radial Glia	5	PAICS	2.12e-23	0.618932	0.847	0.584	5.07e-19	1.96e-24	0.603398	0.776	0.564	4.67e-20	2.9e-39	0.76765	0.871	0.642	6.92e-35	7.69e-82	0.596389	0.909	0.655	1.84e-77	7.12e-54	0.475276	0.857	0.679	1.7e-49	8.78e-61	0.780159	0.889	0.614	2.1e-56	2.12e-23	4.61e-81
Radial Glia	5	TMPO	2.31e-38	0.889414	0.876	0.579	5.51e-34	5.36e-33	0.73177	0.787	0.549	1.28e-28	2.25e-47	0.795742	0.923	0.684	5.38e-43	1.15e-81	0.621709	0.927	0.712	2.76e-77	3.39e-52	0.472507	0.831	0.647	8.09e-48	3.67e-47	0.588909	0.878	0.608	8.76e-43	5.36e-33	6.93e-81
Radial Glia	5	RFC3	6.25e-36	0.484508	0.515	0.167	1.49e-31	1.25e-50	0.711848	0.527	0.182	2.99e-46	1.88e-55	0.558923	0.629	0.225	4.49e-51	2.56e-79	0.504779	0.563	0.242	6.11e-75	2e-45	0.339019	0.411	0.21	4.77e-41	1.37e-71	0.582915	0.572	0.2	3.27e-67	6.25e-36	1.54e-78
Radial Glia	5	SMC2	5.92e-46	0.571964	0.574	0.174	1.41e-41	1.06e-32	0.535519	0.422	0.16	2.54e-28	1.2e-64	0.75923	0.722	0.263	2.87e-60	4.14e-79	0.506197	0.675	0.319	9.89e-75	9.22e-45	0.36021	0.571	0.331	2.2e-40	2.39e-64	0.629922	0.636	0.251	5.7e-60	1.06e-32	2.48e-78
Radial Glia	5	HMGB1	8.62e-49	0.994601	0.985	0.919	2.06e-44	1.93e-47	0.969434	0.931	0.896	4.61e-43	3.89e-61	0.864709	0.992	0.978	9.3e-57	6.68e-79	0.511681	0.997	0.983	1.59e-74	4.07e-71	0.444716	0.993	0.979	9.73e-67	3.3e-74	0.690587	0.997	0.971	7.89e-70	1.93e-47	4.01e-78
Radial Glia	5	PSMC3IP	5.68e-53	0.602945	0.47	0.117	1.36e-48	1.79e-46	0.507542	0.379	0.106	4.28e-42	1.56e-43	0.651101	0.544	0.21	3.72e-39	3.61e-66	0.385062	0.473	0.198	8.61e-62	6.98e-67	0.39233	0.419	0.178	1.67e-62	6.43e-78	0.689444	0.606	0.219	1.53e-73	1.56e-43	3.86e-77
Radial Glia	5	CCND1	1.78e-30	0.864176	0.891	0.557	4.26e-26	1.02e-35	0.782678	0.848	0.537	2.45e-31	1.82e-47	1.05448	0.859	0.494	4.35e-43	9.75e-78	0.783923	0.9	0.612	2.33e-73	2.84e-49	0.610956	0.786	0.6	6.79e-45	1.47e-47	0.863211	0.8	0.483	3.5e-43	1.78e-30	5.85e-77
Radial Glia	5	RRM2	3.07e-40	0.446972	0.332	0.073	7.32e-36	1.5e-29	0.364658	0.245	0.066	3.59e-25	1.57e-68	0.798798	0.573	0.155	3.74e-64	1.46e-38	0.338852	0.412	0.194	3.48e-34	9.91e-36	0.355908	0.378	0.196	2.37e-31	1.96e-77	0.74165	0.539	0.164	4.68e-73	1.5e-29	1.18e-76
Radial Glia	5	MAD2L1	3.44e-45	0.686096	0.594	0.193	8.22e-41	4.7e-42	0.578105	0.491	0.17	1.12e-37	2.17e-77	0.879916	0.73	0.229	5.18e-73	1.81e-74	0.487939	0.628	0.278	4.33e-70	4.02e-50	0.373253	0.591	0.322	9.6e-46	6.97e-73	0.628472	0.636	0.218	1.66e-68	4.7e-42	1.3e-76
Radial Glia	5	LIG1	2.03e-39	0.588672	0.47	0.14	4.84e-35	9.45e-27	0.445219	0.336	0.122	2.26e-22	2.09e-57	0.655027	0.609	0.213	4.98e-53	7.63e-53	0.387985	0.455	0.209	1.82e-48	5.31e-52	0.340414	0.447	0.221	1.27e-47	8.49e-77	0.697837	0.583	0.199	2.03e-72	9.45e-27	5.09e-76
Radial Glia	5	GGCT	1.06e-34	0.750254	0.658	0.298	2.52e-30	2.12e-27	0.574703	0.426	0.184	5.06e-23	1.18e-28	0.493363	0.613	0.322	2.82e-24	4.94e-48	0.469048	0.647	0.403	1.18e-43	4.69e-76	0.605094	0.768	0.529	1.12e-71	1.46e-51	0.525629	0.625	0.286	3.48e-47	2.12e-27	2.82e-75
Radial Glia	5	SMC4	6.73e-34	0.616136	0.54	0.194	1.61e-29	2.3e-20	0.426823	0.426	0.2	5.49e-16	8.68e-62	0.808569	0.742	0.274	2.07e-57	3.49e-63	0.455465	0.668	0.332	8.34e-59	2.01e-44	0.318739	0.584	0.331	4.81e-40	6.54e-74	0.690845	0.694	0.261	1.56e-69	2.3e-20	3.92e-73
Radial Glia	5	NUSAP1	3.59e-45	0.721218	0.52	0.145	8.56e-41	4.51e-31	0.560207	0.477	0.186	1.08e-26	4.33e-70	0.96076	0.766	0.237	1.03e-65	3.03e-52	0.372401	0.624	0.289	7.24e-48	3.93e-33	0.274341	0.56	0.31	9.37e-29	1.56e-73	0.669738	0.708	0.238	3.72e-69	4.51e-31	9.35e-73
Radial Glia	5	SERBP1	5.79e-27	0.59932	0.965	0.867	1.38e-22	3.4e-25	0.556631	0.917	0.845	8.12e-21	5.62e-35	0.539808	0.984	0.938	1.34e-30	1.01e-71	0.471325	0.98	0.93	2.42e-67	9.42e-63	0.419099	0.971	0.928	2.25e-58	1.41e-33	0.416461	0.981	0.929	3.37e-29	3.4e-25	6.07e-71
Radial Glia	5	HNRNPD	1.73e-33	0.768434	0.891	0.63	4.14e-29	7.99e-33	0.811029	0.801	0.575	1.91e-28	1.47e-44	0.732471	0.956	0.887	3.5e-40	2.15e-66	0.522869	0.955	0.865	5.14e-62	7.04e-71	0.504956	0.947	0.862	1.68e-66	9.69e-59	0.663063	0.967	0.864	2.31e-54	7.99e-33	4.22e-70
Radial Glia	5	EZH2	3.13e-14	0.395952	0.703	0.43	7.48e-10	8.12e-12	0.383942	0.606	0.418	1.94e-07	4.21e-41	0.654955	0.835	0.521	1.01e-36	5.83e-56	0.496782	0.784	0.514	1.39e-51	3.25e-66	0.526456	0.731	0.477	7.76e-62	1.38e-52	0.665971	0.833	0.511	3.3e-48	8.12e-12	1.95e-65
Radial Glia	5	PSIP1	2.21e-30	0.718116	0.936	0.692	5.27e-26	7.15e-30	0.721485	0.848	0.672	1.71e-25	1.6e-42	0.60936	0.96	0.913	3.82e-38	5.99e-66	0.512971	0.964	0.874	1.43e-61	7.68e-61	0.456793	0.938	0.866	1.83e-56	5.17e-46	0.568988	0.964	0.892	1.23e-41	7.15e-30	3.6e-65
Radial Glia	5	SLBP	9.47e-15	0.391104	0.47	0.233	2.26e-10	1.02e-17	0.558739	0.419	0.211	2.44e-13	2.11e-39	0.706812	0.742	0.424	5.04e-35	1.24e-46	0.414501	0.571	0.325	2.97e-42	9.93e-29	0.329048	0.527	0.356	2.37e-24	1.68e-63	0.786321	0.711	0.362	4e-59	9.47e-15	1.01e-62
Radial Glia	5	HMGB2	4.12e-11	0.474235	0.911	0.794	9.85e-07	7.51e-11	0.456339	0.863	0.746	1.79e-06	3.12e-44	0.966758	0.919	0.7	7.44e-40	9.33e-63	0.491818	0.937	0.687	2.23e-58	2.89e-35	0.278501	0.968	0.871	6.91e-31	8.97e-53	0.733274	0.936	0.702	2.14e-48	7.51e-11	5.6e-62
Radial Glia	5	PA2G4	1.09e-22	0.743564	0.866	0.638	2.6e-18	5.2e-20	0.597953	0.755	0.572	1.24e-15	9.11e-51	0.822055	0.956	0.842	2.18e-46	1.03e-61	0.533337	0.938	0.806	2.47e-57	2.15e-43	0.419386	0.898	0.787	5.14e-39	1.04e-62	0.746052	0.947	0.818	2.48e-58	5.2e-20	6.24e-62
Radial Glia	5	HMGA1	1.97e-22	0.651395	0.851	0.598	4.71e-18	2.84e-11	0.407553	0.74	0.597	6.78e-07	3.99e-31	0.729485	0.863	0.629	9.53e-27	1.02e-61	0.566755	0.884	0.634	2.43e-57	9.4e-45	0.457345	0.848	0.672	2.24e-40	6.96e-37	0.653281	0.872	0.628	1.66e-32	2.84e-11	6.11e-61
Radial Glia	5	PRKDC	1.78e-33	0.779733	0.921	0.639	4.24e-29	8.48e-33	0.817334	0.809	0.572	2.02e-28	1.74e-48	0.769536	0.952	0.835	4.15e-44	1.87e-61	0.515078	0.956	0.822	4.47e-57	4.28e-57	0.497986	0.918	0.818	1.02e-52	7.07e-56	0.722187	0.922	0.776	1.69e-51	8.48e-33	1.12e-60
Radial Glia	5	LSM4	1.47e-20	0.540546	0.822	0.593	3.52e-16	1.14e-19	0.467362	0.794	0.598	2.71e-15	8.44e-43	0.635693	0.964	0.819	2.01e-38	3.1e-61	0.483072	0.955	0.834	7.39e-57	2.27e-46	0.381895	0.918	0.844	5.43e-42	8.89e-52	0.630058	0.931	0.79	2.12e-47	1.14e-19	1.86e-60
Radial Glia	5	HSPD1	9.39e-22	0.512481	0.965	0.864	2.24e-17	7.26e-17	0.485358	0.931	0.867	1.73e-12	6.74e-43	0.640195	0.976	0.933	1.61e-38	1.05e-58	0.467067	0.977	0.925	2.51e-54	8.83e-54	0.405362	0.98	0.933	2.11e-49	3.73e-61	0.65905	0.978	0.918	8.89e-57	7.26e-17	2.24e-60
Radial Glia	5	SRSF2	6.32e-14	0.381551	0.777	0.529	1.51e-09	4.94e-13	0.509707	0.639	0.469	1.18e-08	1.55e-42	0.739142	0.931	0.804	3.71e-38	3e-60	0.512972	0.929	0.768	7.16e-56	9.99e-58	0.507646	0.898	0.754	2.38e-53	1.54e-56	0.696275	0.925	0.763	3.68e-52	4.94e-13	1.8e-59
Radial Glia	5	PRIM1	1.28e-51	1.63618	0.535	0.142	3.07e-47	1.64e-27	1.19857	0.383	0.149	3.92e-23	1.13e-35	0.47544	0.544	0.228	2.69e-31	1.78e-58	0.371895	0.506	0.238	4.25e-54	1.45e-38	0.282784	0.408	0.218	3.47e-34	2.59e-42	0.442734	0.469	0.189	6.17e-38	1.64e-27	1.07e-57
Radial Glia	5	LMNB1	1.54e-30	0.557699	0.668	0.302	3.67e-26	4.81e-38	0.633724	0.56	0.24	1.15e-33	7.14e-50	0.699918	0.827	0.463	1.71e-45	7.58e-57	0.474578	0.733	0.44	1.81e-52	1.14e-40	0.391344	0.611	0.396	2.71e-36	4.47e-48	0.602697	0.756	0.424	1.07e-43	1.54e-30	4.55e-56
Radial Glia	5	MIS18BP1	1.78e-34	0.563441	0.485	0.156	4.25e-30	6.36e-36	0.684373	0.455	0.168	1.52e-31	1.8e-46	0.630094	0.573	0.198	4.29e-42	6.08e-51	0.354108	0.527	0.255	1.45e-46	2.08e-21	0.251505	0.426	0.267	4.97e-17	2.13e-55	0.490352	0.547	0.2	5.09e-51	2.08e-21	1.28e-54
Radial Glia	5	RFC1	1.52e-38	0.878244	0.807	0.441	3.62e-34	6.14e-26	0.664235	0.682	0.409	1.47e-21	2.08e-43	0.710014	0.891	0.615	4.97e-39	2.54e-55	0.550853	0.811	0.584	6.05e-51	1.62e-41	0.443859	0.747	0.583	3.88e-37	1.85e-51	0.677454	0.847	0.583	4.43e-47	6.14e-26	1.52e-54
Radial Glia	5	CENPV	7.2e-17	0.535194	0.797	0.559	1.72e-12	7.1e-21	0.604718	0.773	0.555	1.7e-16	1.05e-23	0.589507	0.895	0.721	2.5e-19	5.56e-55	0.615424	0.887	0.726	1.33e-50	6.5e-42	0.539629	0.828	0.708	1.55e-37	8.62e-31	0.633205	0.9	0.713	2.06e-26	7.2e-17	3.34e-54
Radial Glia	5	ARL6IP6	1.39e-34	0.629353	0.574	0.227	3.31e-30	1.2e-43	0.604598	0.542	0.217	2.87e-39	1.31e-29	0.478553	0.758	0.472	3.12e-25	6.43e-54	0.42772	0.627	0.354	1.54e-49	2.99e-50	0.38639	0.576	0.342	7.13e-46	6.76e-43	0.576698	0.728	0.432	1.61e-38	1.31e-29	3.86e-53
Radial Glia	5	GSTP1	3.59e-19	0.594755	0.891	0.686	8.57e-15	2.56e-20	0.566701	0.841	0.675	6.12e-16	8.87e-32	0.575996	0.968	0.855	2.12e-27	1.39e-53	0.459148	0.971	0.884	3.31e-49	2.88e-25	0.276083	0.965	0.912	6.88e-21	6.09e-42	0.554996	0.972	0.856	1.45e-37	3.59e-19	8.31e-53
Radial Glia	5	SUPT16H	1.29e-19	0.697919	0.842	0.6	3.09e-15	8.27e-14	0.448249	0.711	0.554	1.97e-09	2.87e-33	0.61252	0.931	0.82	6.84e-29	1.7e-48	0.495603	0.908	0.758	4.05e-44	1.46e-42	0.45183	0.859	0.732	3.47e-38	1.72e-43	0.597085	0.919	0.765	4.1e-39	8.27e-14	1.02e-47
Radial Glia	5	KNOP1	2.06e-30	0.821824	0.713	0.375	4.92e-26	1.89e-24	0.618081	0.628	0.353	4.5e-20	1.83e-28	0.632827	0.79	0.532	4.37e-24	1.81e-44	0.43108	0.739	0.49	4.33e-40	7.48e-47	0.464043	0.678	0.468	1.78e-42	8.61e-45	0.646801	0.822	0.532	2.05e-40	1.89e-24	4.49e-46
Radial Glia	5	HNRNPF	6.16e-13	0.42452	0.634	0.383	1.47e-08	9.51e-06	0.261986	0.473	0.36	0.227009	4.72e-40	0.750881	0.883	0.687	1.13e-35	9.42e-47	0.52867	0.769	0.558	2.25e-42	2.87e-40	0.411426	0.75	0.577	6.85e-36	1.19e-45	0.658031	0.858	0.602	2.84e-41	9.51e-06	5.65e-46
Radial Glia	5	CKS1B	8.74e-46	0.842991	0.693	0.257	2.09e-41	5.04e-26	0.624959	0.603	0.314	1.2e-21	6.59e-44	0.758742	0.762	0.37	1.57e-39	3.17e-44	0.369	0.733	0.423	7.56e-40	9.43e-33	0.27716	0.706	0.458	2.25e-28	1.22e-44	0.563534	0.7	0.341	2.91e-40	5.04e-26	5.24e-45
Radial Glia	5	GLO1	4.98e-21	0.602885	0.866	0.637	1.19e-16	1.31e-24	0.626137	0.834	0.648	3.13e-20	1.35e-31	0.541678	0.927	0.744	3.23e-27	1.16e-42	0.412298	0.881	0.687	2.78e-38	2.73e-20	0.306299	0.817	0.716	6.51e-16	3.73e-42	0.588673	0.908	0.71	8.91e-38	2.73e-20	6.99e-42
Radial Glia	5	CENPF	4.92e-32	0.605382	0.579	0.215	1.18e-27	7.97e-23	0.565835	0.527	0.253	1.9e-18	8.29e-38	1.06503	0.71	0.316	1.98e-33	6.98e-22	0.331537	0.592	0.356	1.67e-17	2.72e-17	0.282209	0.591	0.398	6.5e-13	1.87e-42	0.715389	0.714	0.32	4.46e-38	2.72e-17	1.12e-41
Radial Glia	5	ANP32E	8.89e-25	0.646857	0.842	0.575	2.12e-20	3.16e-24	0.669963	0.769	0.551	7.55e-20	6.66e-35	0.681089	0.903	0.681	1.59e-30	5.29e-33	0.35329	0.856	0.656	1.26e-28	5.39e-21	0.260666	0.791	0.658	1.29e-16	8.11e-31	0.488489	0.869	0.668	1.94e-26	5.39e-21	4e-34
Radial Glia	6	BIRC5	7.1e-141	1.93385	0.688	0.13	1.7e-136	2.96e-128	1.83427	0.621	0.139	7.07e-124	4.85e-180	1.88142	0.815	0.201	1.16e-175	2.52e-194	1.63654	0.854	0.252	6.01e-190	5.63e-242	1.52517	0.869	0.271	1.35e-237	0	1.68861	0.845	0.194	0	2.96e-128	0
Radial Glia	6	TOP2A	3.14e-133	2.47956	0.817	0.204	7.5e-129	2.8e-130	2.40031	0.77	0.226	6.68e-126	5.53e-177	2.01021	0.915	0.242	1.32e-172	2.81e-150	1.52486	0.888	0.284	6.7e-146	8.68e-170	1.18721	0.88	0.299	2.07e-165	0	1.85018	0.939	0.25	0	2.8e-130	0
Radial Glia	6	CENPF	4.63e-112	2.5488	0.742	0.206	1.11e-107	1.81e-123	2.43748	0.754	0.241	4.33e-119	2e-165	2.20639	0.912	0.301	4.77e-161	5.25e-150	1.73846	0.898	0.35	1.25e-145	5.93e-186	1.63031	0.908	0.384	1.42e-181	0	2.03903	0.944	0.294	0	4.63e-112	0
Radial Glia	6	MKI67	1.79e-101	1.76002	0.575	0.112	4.26e-97	9.82e-117	1.73872	0.599	0.132	2.34e-112	4.89e-129	1.29595	0.724	0.169	1.17e-124	8.34e-115	1.0936	0.726	0.213	1.99e-110	1.53e-129	0.84005	0.692	0.212	3.66e-125	0	1.378	0.818	0.158	0	1.79e-101	0
Radial Glia	6	CDC20	1.7e-108	2.22575	0.633	0.143	4.05e-104	5.05e-119	2.23201	0.605	0.148	1.21e-114	1.36e-155	1.99196	0.721	0.171	3.24e-151	2.16e-206	2.18447	0.796	0.205	5.15e-202	1.54e-239	1.94912	0.839	0.267	3.68e-235	6.45e-292	1.95034	0.741	0.169	1.54e-287	1.7e-108	3.87e-291
Radial Glia	6	UBE2C	3.96e-127	2.68586	0.692	0.146	9.45e-123	1.38e-129	2.65185	0.68	0.174	3.29e-125	9.63e-141	2.12479	0.781	0.208	2.3e-136	5.82e-134	2.13871	0.747	0.236	1.39e-129	1.57e-165	2.03412	0.786	0.272	3.76e-161	3.12e-268	1.89844	0.795	0.198	7.46e-264	3.96e-127	1.87e-267
Radial Glia	6	TPX2	1.08e-79	1.88148	0.554	0.134	2.57e-75	4.91e-84	1.74543	0.537	0.146	1.17e-79	2.41e-128	1.48256	0.724	0.185	5.76e-124	2.02e-116	1.34534	0.726	0.232	4.83e-112	1.15e-137	1.04959	0.702	0.231	2.74e-133	4.17e-260	1.45109	0.733	0.168	9.94e-256	1.08e-79	2.5e-259
Radial Glia	6	PTTG1	1.52e-95	2.5175	0.787	0.298	3.62e-91	2.06e-88	2.60387	0.728	0.336	4.93e-84	3.78e-142	2.3049	0.846	0.325	9.02e-138	4.32e-183	2.34981	0.922	0.411	1.03e-178	4.39e-232	2.21907	0.929	0.44	1.05e-227	1.02e-257	2.17789	0.851	0.307	2.43e-253	2.06e-88	6.1e-257
Radial Glia	6	CCNB2	2.94e-88	1.76844	0.608	0.159	7.02e-84	3.14e-94	1.78142	0.583	0.164	7.49e-90	1.11e-165	1.88973	0.787	0.205	2.65e-161	3.9e-192	1.9044	0.851	0.268	9.32e-188	1.4e-237	1.73536	0.873	0.297	3.35e-233	4.79e-252	1.63037	0.731	0.191	1.14e-247	2.94e-88	2.88e-251
Radial Glia	6	NUSAP1	3.8e-52	1.42182	0.492	0.144	9.08e-48	2.65e-58	1.49448	0.524	0.182	6.33e-54	7e-137	1.75165	0.815	0.229	1.67e-132	2.99e-70	1.11714	0.708	0.297	7.15e-66	7.91e-102	1.11061	0.737	0.308	1.89e-97	1.56e-251	1.48648	0.827	0.217	3.71e-247	3.8e-52	9.34e-251
Radial Glia	6	CCNB1	1.85e-85	1.91547	0.521	0.114	4.41e-81	9.52e-110	1.98419	0.547	0.122	2.27e-105	3.15e-139	2.15862	0.759	0.229	7.52e-135	1.92e-165	1.98594	0.781	0.237	4.57e-161	2.05e-207	2.00746	0.808	0.281	4.89e-203	2.76e-241	1.92267	0.731	0.203	6.59e-237	1.85e-85	1.66e-240
Radial Glia	6	DLGAP5	4.44e-62	1.27871	0.383	0.076	1.06e-57	7.56e-65	1.20295	0.395	0.093	1.8e-60	2.94e-101	1.21676	0.586	0.143	7.02e-97	2.16e-99	0.956851	0.595	0.17	5.17e-95	4.33e-142	1.01739	0.635	0.179	1.03e-137	7.99e-233	1.18823	0.625	0.129	1.91e-228	4.44e-62	4.79e-232
Radial Glia	6	HMMR	2.65e-80	1.50394	0.45	0.088	6.32e-76	3.51e-88	1.4833	0.476	0.112	8.38e-84	7.71e-104	1.19801	0.58	0.144	1.84e-99	8.11e-112	1.02514	0.59	0.162	1.94e-107	1.58e-156	1.03494	0.643	0.178	3.77e-152	3.27e-229	1.34075	0.629	0.14	7.81e-225	2.65e-80	1.96e-228
Radial Glia	6	TACC3	8.11e-43	1.04276	0.329	0.079	1.94e-38	5.22e-54	0.991012	0.337	0.082	1.25e-49	1.06e-85	1.04735	0.542	0.145	2.53e-81	1.15e-71	0.724594	0.488	0.154	2.75e-67	2.64e-115	0.67971	0.537	0.154	6.3e-111	2.5e-203	1.06933	0.609	0.144	5.96e-199	8.11e-43	1.5e-202
Radial Glia	6	ASPM	1.12e-43	1.05015	0.408	0.114	2.68e-39	2.97e-42	1.11064	0.385	0.123	7.09e-38	5.03e-89	1.20581	0.574	0.153	1.2e-84	3.66e-53	0.8708	0.517	0.203	8.74e-49	1.28e-76	0.700698	0.545	0.199	3.06e-72	8.88e-192	1.05654	0.622	0.15	2.12e-187	2.97e-42	5.33e-191
Radial Glia	6	HMGB1	8.36e-69	1.43631	0.925	0.921	2e-64	3.76e-64	1.37976	0.893	0.898	8.96e-60	3.42e-95	1.24407	0.962	0.979	8.17e-91	7.15e-131	1.09995	0.997	0.984	1.71e-126	5.56e-169	1.0877	0.996	0.979	1.33e-164	7.51e-179	1.14433	0.985	0.971	1.79e-174	3.76e-64	4.51e-178
Radial Glia	6	CDKN3	2.8e-40	0.994033	0.338	0.088	6.69e-36	1.52e-84	1.55175	0.447	0.101	3.62e-80	5.16e-97	1.26871	0.621	0.176	1.23e-92	2.49e-109	1.22326	0.629	0.196	5.93e-105	2.78e-173	1.29095	0.686	0.202	6.65e-169	2.06e-162	1.22521	0.579	0.159	4.92e-158	2.8e-40	1.67e-172
Radial Glia	6	GTSE1	5.66e-66	1.10861	0.412	0.084	1.35e-61	7.7e-50	0.966459	0.356	0.095	1.84e-45	3.31e-76	0.927396	0.555	0.158	7.89e-72	1.28e-68	0.79132	0.522	0.175	3.06e-64	1.63e-86	0.643051	0.535	0.181	3.88e-82	1.76e-172	0.96765	0.597	0.151	4.21e-168	7.7e-50	1.06e-171
Radial Glia	6	KIF4A	1.37e-57	0.868681	0.333	0.063	3.28e-53	4.67e-56	0.803586	0.327	0.075	1.12e-51	1.23e-123	0.986831	0.586	0.125	2.93e-119	7.43e-87	0.725183	0.507	0.143	1.77e-82	6.25e-112	0.644862	0.514	0.145	1.49e-107	1.49e-168	0.783997	0.515	0.118	3.57e-164	4.67e-56	8.97e-168
Radial Glia	6	PLK1	1.51e-43	0.918996	0.338	0.082	3.62e-39	1.05e-51	0.977396	0.327	0.081	2.51e-47	5.09e-104	1.36702	0.527	0.118	1.22e-99	1.41e-90	1.05543	0.47	0.124	3.36e-86	3.73e-163	1.20082	0.602	0.152	8.91e-159	9.45e-168	1.14535	0.503	0.114	2.26e-163	1.51e-43	5.67e-167
Radial Glia	6	HMGN2	8.21e-44	1.23299	0.854	0.829	1.96e-39	2.37e-52	1.22703	0.832	0.811	5.65e-48	6.36e-106	1.25977	0.966	0.958	1.52e-101	3.01e-132	1.1732	0.984	0.934	7.19e-128	7.11e-161	1.07915	0.982	0.959	1.7e-156	2.73e-167	1.2044	0.975	0.955	6.53e-163	8.21e-44	1.64e-166
Radial Glia	6	TUBA1B	3.02e-32	1.18065	0.854	0.818	7.22e-28	3.39e-36	1.07133	0.858	0.852	8.1e-32	1.29e-108	1.30605	0.981	0.976	3.08e-104	1.96e-119	1.10644	0.995	0.972	4.68e-115	1.96e-141	1.01008	0.99	0.97	4.68e-137	3.64e-164	1.11846	0.992	0.973	8.7e-160	3.02e-32	2.19e-163
Radial Glia	6	CENPE	7.07e-34	0.924431	0.388	0.127	1.69e-29	2.87e-59	1.39742	0.434	0.122	6.85e-55	6.19e-56	0.940755	0.464	0.141	1.48e-51	3.99e-46	0.596848	0.499	0.195	9.54e-42	5.32e-59	0.577044	0.529	0.217	1.27e-54	2.72e-163	0.859467	0.545	0.128	6.5e-159	7.07e-34	1.63e-162
Radial Glia	6	HMGB2	1.97e-68	2.23826	0.921	0.793	4.7e-64	3.43e-79	2.08081	0.903	0.743	8.19e-75	3.7e-92	1.8605	0.912	0.698	8.83e-88	4.75e-122	1.67471	0.963	0.695	1.13e-117	6.5e-161	1.51825	0.988	0.874	1.55e-156	1.4e-156	1.68862	0.937	0.696	3.34e-152	1.97e-68	3.9e-160
Radial Glia	6	NUF2	1.98e-68	1.18	0.4	0.079	4.74e-64	3.3e-76	1.42678	0.401	0.088	7.89e-72	9.01e-70	0.927835	0.489	0.136	2.15e-65	1.3e-88	0.986335	0.585	0.189	3.11e-84	3.08e-112	0.994664	0.598	0.196	7.34e-108	5.73e-157	0.943997	0.518	0.125	1.37e-152	1.98e-68	3.44e-156
Radial Glia	6	H2AFZ	3.74e-09	0.670902	0.779	0.795	8.93e-05	7.32e-22	0.8621	0.816	0.775	1.75e-17	2.09e-99	1.27024	0.962	0.963	5e-95	2.21e-117	1.05574	0.974	0.966	5.27e-113	5.95e-155	1.10765	0.982	0.952	1.42e-150	9.32e-151	1.1017	0.974	0.948	2.23e-146	3.74e-09	3.57e-154
Radial Glia	6	PBK	3.24e-71	1.3284	0.454	0.095	7.72e-67	8.52e-74	1.17526	0.437	0.103	2.03e-69	6.45e-66	0.837366	0.505	0.147	1.54e-61	1.99e-60	0.765491	0.535	0.196	4.76e-56	7.85e-69	0.675926	0.506	0.193	1.87e-64	9.56e-148	0.836251	0.545	0.141	2.28e-143	1.99e-60	5.74e-147
Radial Glia	6	CKS1B	1.11e-49	1.51435	0.625	0.257	2.64e-45	1.2e-56	1.62207	0.65	0.311	2.87e-52	1.64e-78	1.43732	0.774	0.365	3.92e-74	1.48e-94	1.20394	0.854	0.428	3.54e-90	2.67e-144	1.31965	0.896	0.455	6.37e-140	2.85e-146	1.23135	0.769	0.327	6.81e-142	1.11e-49	1.71e-145
Radial Glia	6	PRR11	5.4e-65	1.55142	0.525	0.148	1.29e-60	2.19e-80	1.23723	0.492	0.126	5.22e-76	8.99e-62	0.663478	0.473	0.14	2.15e-57	2.42e-39	0.453778	0.402	0.155	5.79e-35	1.53e-61	0.439363	0.429	0.155	3.65e-57	8.53e-144	0.749191	0.528	0.14	2.04e-139	2.42e-39	5.12e-143
Radial Glia	6	TROAP	7.23e-64	1.12521	0.317	0.053	1.73e-59	2.01e-68	1.04391	0.327	0.064	4.79e-64	1.02e-134	0.812904	0.558	0.103	2.43e-130	2.97e-100	0.609101	0.449	0.102	7.08e-96	2.12e-129	0.597418	0.482	0.117	5.07e-125	8.94e-143	0.658463	0.427	0.095	2.13e-138	7.23e-64	5.36e-142
Radial Glia	6	BUB1	7.46e-60	0.960554	0.346	0.066	1.78e-55	1.7e-54	0.741815	0.324	0.074	4.07e-50	4.08e-82	0.984324	0.461	0.108	9.75e-78	2.35e-61	0.632352	0.405	0.12	5.61e-57	5.55e-91	0.562619	0.42	0.113	1.32e-86	7.17e-134	0.725802	0.429	0.1	1.71e-129	1.7e-54	4.3e-133
Radial Glia	6	NUCKS1	4.18e-50	1.19642	0.912	0.885	9.99e-46	2.89e-49	1.21068	0.848	0.874	6.9e-45	1.18e-69	1.02354	0.9	0.947	2.83e-65	2.65e-81	0.94619	0.961	0.933	6.33e-77	2.73e-102	0.880471	0.973	0.934	6.52e-98	5.38e-131	0.972398	0.944	0.921	1.28e-126	2.89e-49	3.23e-130
Radial Glia	6	ECT2	2.7e-40	1.1163	0.458	0.161	6.44e-36	1.88e-41	1.09591	0.46	0.182	4.5e-37	2.5e-50	0.95856	0.476	0.167	5.97e-46	3.13e-53	0.799799	0.525	0.213	7.46e-49	1.21e-63	0.564078	0.524	0.213	2.9e-59	8.16e-130	0.838874	0.513	0.147	1.95e-125	2.7e-40	4.9e-129
Radial Glia	6	CCNA2	1.37e-52	1.10389	0.392	0.095	3.27e-48	8.54e-46	0.90054	0.362	0.106	2.04e-41	5.52e-53	0.828783	0.451	0.143	1.32e-48	1.92e-64	0.858824	0.507	0.18	4.58e-60	1.29e-84	0.722473	0.52	0.181	3.07e-80	3.02e-128	0.85073	0.5	0.136	7.21e-124	8.54e-46	1.81e-127
Radial Glia	6	UBE2S	6.85e-56	2.41233	0.829	0.631	1.64e-51	6.44e-62	2.38995	0.783	0.603	1.54e-57	2.26e-66	1.59374	0.89	0.774	5.39e-62	4.91e-103	1.61863	0.932	0.787	1.17e-98	6.12e-128	1.63029	0.929	0.746	1.46e-123	9.87e-109	1.48379	0.881	0.704	2.36e-104	6.85e-56	3.67e-127
Radial Glia	6	PRC1	4.98e-31	1.35332	0.417	0.158	1.19e-26	1.72e-46	1.2632	0.469	0.173	4.1e-42	1.65e-50	1.0387	0.552	0.215	3.93e-46	7.16e-45	0.706484	0.53	0.231	1.71e-40	8.84e-49	0.521831	0.516	0.234	2.11e-44	3e-127	0.826658	0.597	0.192	7.17e-123	4.98e-31	1.8e-126
Radial Glia	6	FAM64A	6.99e-22	0.35987	0.2	0.053	1.67e-17	8.94e-30	0.543945	0.239	0.068	2.14e-25	4e-64	0.966521	0.495	0.149	9.54e-60	8.4e-70	0.873858	0.507	0.169	2e-65	4.89e-75	0.785692	0.494	0.181	1.17e-70	1.95e-126	0.869086	0.508	0.144	4.65e-122	6.99e-22	1.17e-125
Radial Glia	6	CENPA	1.79e-28	0.591943	0.204	0.046	4.26e-24	6.63e-39	0.610572	0.239	0.056	1.58e-34	6.16e-74	0.704104	0.429	0.101	1.47e-69	2.43e-74	0.661664	0.379	0.094	5.79e-70	1.5e-88	0.608289	0.41	0.112	3.59e-84	1.91e-125	0.643864	0.401	0.092	4.56e-121	1.79e-28	1.15e-124
Radial Glia	6	SGOL2	5.54e-34	1.06867	0.325	0.093	1.32e-29	3.79e-43	1.04372	0.353	0.105	9.05e-39	1.47e-55	1.02264	0.502	0.174	3.51e-51	1.12e-54	0.786642	0.496	0.188	2.68e-50	1.46e-89	0.737838	0.531	0.183	3.48e-85	1.04e-122	0.916362	0.531	0.162	2.48e-118	5.54e-34	6.24e-122
Radial Glia	6	HNRNPA2B1	3.94e-32	1.01532	0.854	0.873	9.4e-28	3.87e-22	0.779531	0.828	0.866	9.23e-18	1.8e-83	0.943737	0.956	0.972	4.29e-79	1.13e-109	0.87102	0.982	0.97	2.7e-105	2.8e-122	0.824364	0.982	0.966	6.69e-118	6.54e-108	0.755427	0.974	0.965	1.56e-103	3.87e-22	1.68e-121
Radial Glia	6	AURKB	3.15e-43	0.866059	0.35	0.087	7.53e-39	1.14e-47	1.07097	0.35	0.096	2.73e-43	2.05e-67	0.829716	0.502	0.141	4.89e-63	1.85e-76	0.936543	0.543	0.178	4.41e-72	1.97e-118	0.833809	0.61	0.191	4.7e-114	2.36e-104	0.714408	0.447	0.129	5.64e-100	3.15e-43	1.18e-117
Radial Glia	6	TUBA1C	1.1e-10	0.925357	0.308	0.166	2.64e-06	1.09e-10	0.895795	0.317	0.197	2.6e-06	7.24e-59	1.60877	0.724	0.438	1.73e-54	3.01e-19	1.11353	0.41	0.249	7.18e-15	5.36e-32	0.874262	0.496	0.296	1.28e-27	4.67e-118	1.46273	0.746	0.403	1.12e-113	1.1e-10	2.8e-117
Radial Glia	6	CDCA8	3.2e-45	0.882893	0.325	0.073	7.65e-41	7.3e-55	0.922363	0.346	0.084	1.74e-50	1.27e-41	0.72319	0.392	0.13	3.03e-37	7.16e-46	0.824669	0.426	0.164	1.71e-41	5.34e-59	0.640168	0.441	0.167	1.27e-54	1.12e-115	0.768156	0.444	0.118	2.68e-111	1.27e-41	6.75e-115
Radial Glia	6	RAN	2.35e-27	0.861059	0.85	0.859	5.61e-23	3.68e-18	0.71455	0.773	0.846	8.79e-14	6.33e-81	0.916872	0.922	0.964	1.51e-76	3.14e-110	0.880481	0.958	0.955	7.48e-106	1.63e-114	0.761996	0.973	0.952	3.88e-110	9.38e-89	0.694844	0.955	0.953	2.24e-84	3.68e-18	9.75e-114
Radial Glia	6	NEK2	6.52e-84	1.48178	0.392	0.063	1.56e-79	3.88e-73	1.2187	0.356	0.07	9.26e-69	6.83e-83	0.901849	0.423	0.091	1.63e-78	1.93e-56	0.71791	0.36	0.106	4.61e-52	1.09e-106	0.761564	0.435	0.111	2.6e-102	3.56e-113	0.581363	0.358	0.08	8.5e-109	1.93e-56	2.14e-112
Radial Glia	6	KIF2C	1.31e-56	0.963708	0.325	0.061	3.12e-52	1.56e-71	1.16521	0.35	0.069	3.72e-67	3.42e-68	0.736563	0.445	0.114	8.17e-64	1.36e-48	0.516774	0.379	0.125	3.25e-44	2.54e-93	0.640804	0.469	0.138	6.07e-89	4.06e-113	0.615499	0.401	0.1	9.7e-109	1.36e-48	2.44e-112
Radial Glia	6	HMGB3	2.73e-11	0.947299	0.6	0.519	6.52e-07	8.41e-14	0.99047	0.531	0.403	2.01e-09	1.73e-54	1.08402	0.85	0.781	4.12e-50	2.14e-72	0.948762	0.885	0.719	5.1e-68	7.99e-113	1.04533	0.918	0.7	1.91e-108	2.94e-86	0.967356	0.881	0.751	7.03e-82	2.73e-11	4.8e-112
Radial Glia	6	MAD2L1	1.9e-40	1.27387	0.512	0.194	4.55e-36	7.77e-45	1.11323	0.463	0.17	1.85e-40	8.86e-62	0.894958	0.614	0.229	2.12e-57	3.64e-73	1.01073	0.674	0.289	8.69e-69	1.25e-90	0.932356	0.71	0.324	2.97e-86	1.05e-112	0.858871	0.592	0.209	2.51e-108	1.9e-40	6.31e-112
Radial Glia	6	CKS2	1.19e-17	1.47282	0.583	0.409	2.84e-13	7.32e-33	1.65711	0.634	0.435	1.75e-28	5.39e-61	1.64645	0.768	0.463	1.29e-56	9.55e-34	1.03633	0.734	0.527	2.28e-29	2.32e-52	0.990274	0.782	0.563	5.54e-48	1.46e-109	1.3425	0.784	0.436	3.5e-105	1.19e-17	8.79e-109
Radial Glia	6	H2AFV	8.32e-16	0.883089	0.688	0.643	1.99e-11	1.4e-18	0.980489	0.686	0.642	3.34e-14	2.96e-56	1.0451	0.85	0.818	7.08e-52	2.04e-60	0.800793	0.906	0.817	4.88e-56	2.67e-78	0.722808	0.92	0.803	6.38e-74	4.18e-109	0.975819	0.911	0.754	9.98e-105	8.32e-16	2.51e-108
Radial Glia	6	H2AFX	6.01e-09	0.954966	0.392	0.263	0.000143505	1.47e-12	0.894788	0.421	0.276	3.5e-08	5.9e-50	1.11564	0.755	0.479	1.41e-45	7.62e-48	0.986194	0.768	0.49	1.82e-43	6.74e-77	0.982455	0.804	0.48	1.61e-72	2.12e-104	1.06228	0.776	0.425	5.06e-100	6.01e-09	1.27e-103
Radial Glia	6	CASC5	3.09e-45	0.839451	0.329	0.075	7.38e-41	1.55e-35	0.671063	0.307	0.09	3.71e-31	2.24e-46	0.92041	0.404	0.123	5.35e-42	5.95e-37	0.492656	0.389	0.151	1.42e-32	3.11e-54	0.39077	0.398	0.142	7.43e-50	8.1e-103	0.713339	0.414	0.111	1.93e-98	1.55e-35	4.86e-102
Radial Glia	6	ANP32E	3.09e-26	1.17488	0.729	0.578	7.37e-22	7.77e-18	0.998446	0.65	0.556	1.85e-13	2.28e-61	1.17277	0.856	0.681	5.44e-57	1.64e-58	0.89622	0.89	0.661	3.91e-54	5.27e-64	0.727153	0.867	0.658	1.26e-59	4.6e-102	0.995337	0.878	0.662	1.1e-97	7.77e-18	2.76e-101
Radial Glia	6	TTK	4.5e-33	0.866484	0.275	0.07	1.07e-28	4.9e-39	0.790725	0.285	0.075	1.17e-34	6.77e-33	0.659277	0.351	0.123	1.62e-28	1.14e-30	0.48105	0.358	0.146	2.72e-26	2.75e-49	0.506719	0.382	0.141	6.56e-45	1.23e-101	0.667122	0.406	0.109	2.94e-97	1.14e-30	7.39e-101
Radial Glia	6	ARL6IP1	3e-40	1.923	0.742	0.541	7.16e-36	3.88e-52	1.98242	0.722	0.481	9.27e-48	1.86e-51	1.35625	0.815	0.798	4.44e-47	6.57e-49	1.06785	0.807	0.594	1.57e-44	3.4e-99	1.11929	0.851	0.562	8.12e-95	3.06e-100	1.30264	0.878	0.747	7.31e-96	3e-40	1.84e-99
Radial Glia	6	CKAP2	1.51e-26	1.43841	0.496	0.249	3.61e-22	3.5e-31	1.38078	0.518	0.281	8.35e-27	5.63e-35	1.1841	0.608	0.347	1.34e-30	2.93e-29	0.773526	0.606	0.376	7e-25	2.55e-53	0.799755	0.641	0.355	6.09e-49	3.2e-99	1.11219	0.682	0.319	7.64e-95	1.51e-26	1.92e-98
Radial Glia	6	TUBB4B	1.99e-05	1.15411	0.554	0.527	0.47499	6.27e-12	1.43058	0.595	0.539	1.5e-07	1.95e-56	1.47727	0.918	0.871	4.64e-52	6.34e-54	1.32584	0.922	0.835	1.51e-49	3.11e-94	1.36117	0.945	0.82	7.42e-90	3.45e-91	1.27669	0.942	0.854	8.25e-87	1.99e-05	1.87e-93
Radial Glia	6	NMU	1.53e-11	0.630557	0.492	0.334	3.65e-07	2.06e-08	0.461823	0.434	0.322	0.000491913	3.64e-71	1.07137	0.68	0.283	8.69e-67	2.62e-50	0.711875	0.728	0.429	6.26e-46	3.84e-55	0.647401	0.82	0.575	9.18e-51	2.07e-92	0.935341	0.614	0.278	4.94e-88	2.06e-08	1.24e-91
Radial Glia	6	PSRC1	2.65e-19	0.703074	0.25	0.086	6.33e-15	6.64e-29	0.705389	0.278	0.093	1.59e-24	5.02e-38	0.823761	0.398	0.149	1.2e-33	2.52e-73	0.78945	0.452	0.134	6.01e-69	1.18e-85	0.71827	0.453	0.141	2.83e-81	3.01e-90	0.816217	0.426	0.136	7.19e-86	2.65e-19	1.81e-89
Radial Glia	6	NDC80	1.08e-31	0.638172	0.238	0.055	2.57e-27	1.73e-25	0.5671	0.207	0.059	4.13e-21	2.64e-38	0.879099	0.417	0.149	6.31e-34	5.36e-25	0.466889	0.368	0.166	1.28e-20	5.72e-37	0.480611	0.39	0.169	1.37e-32	1.71e-84	0.76965	0.431	0.135	4.09e-80	5.36e-25	1.03e-83
Radial Glia	6	LSM5	1.26e-09	0.860311	0.613	0.567	3.01e-05	2.93e-17	0.962115	0.608	0.527	6.98e-13	5.25e-37	0.88595	0.768	0.754	1.25e-32	6.26e-67	0.854068	0.88	0.725	1.49e-62	1.91e-84	0.793831	0.898	0.731	4.57e-80	8.61e-59	0.783999	0.802	0.679	2.06e-54	1.26e-09	1.15e-83
Radial Glia	6	SMC4	4.71e-11	0.75659	0.358	0.199	1.12e-06	4.79e-11	0.783436	0.34	0.203	1.14e-06	5e-36	0.753351	0.583	0.276	1.19e-31	4.24e-25	0.535156	0.608	0.348	1.01e-20	8.03e-24	0.385031	0.573	0.342	1.92e-19	3.9e-81	0.769922	0.606	0.255	9.32e-77	4.79e-11	2.34e-80
Radial Glia	6	KNSTRN	7.01e-24	0.772613	0.346	0.13	1.67e-19	5.16e-30	0.832134	0.327	0.119	1.23e-25	1.75e-38	0.84326	0.495	0.23	4.18e-34	1.56e-41	0.725822	0.499	0.236	3.74e-37	9.54e-55	0.650251	0.504	0.231	2.28e-50	1.48e-76	0.773573	0.485	0.198	3.52e-72	7.01e-24	8.86e-76
Radial Glia	6	ILF2	5.72e-05	0.565758	0.6	0.582	1	4.79e-05	0.494392	0.553	0.547	1	6.99e-41	0.711178	0.84	0.874	1.67e-36	2.67e-53	0.789219	0.89	0.806	6.38e-49	4.35e-76	0.730491	0.922	0.803	1.04e-71	3.39e-39	0.560819	0.845	0.836	8.1e-35	5.72e-05	2.61e-75
Radial Glia	6	PTGES3	3.05e-19	0.645909	0.821	0.85	7.29e-15	5.96e-25	0.707579	0.809	0.848	1.42e-20	1.04e-36	0.543335	0.893	0.951	2.47e-32	1.19e-55	0.572825	0.943	0.937	2.83e-51	2.29e-75	0.580286	0.973	0.923	5.48e-71	1.82e-44	0.466715	0.926	0.929	4.36e-40	3.05e-19	1.38e-74
Radial Glia	6	CDK1	1.06e-33	1.49156	0.367	0.117	2.53e-29	3.55e-41	1.47842	0.388	0.132	8.48e-37	1.55e-33	1.45228	0.426	0.183	3.7e-29	4.27e-19	0.958292	0.371	0.215	1.02e-14	4.08e-24	0.843121	0.392	0.226	9.74e-20	2.54e-75	1.03148	0.475	0.176	6.05e-71	4.27e-19	1.52e-74
Radial Glia	6	CENPU	1.79e-32	0.853461	0.404	0.142	4.27e-28	2.76e-17	0.473246	0.314	0.145	6.58e-13	1.17e-53	0.796988	0.611	0.227	2.8e-49	4.02e-33	0.454964	0.621	0.318	9.59e-29	6.85e-49	0.51725	0.614	0.304	1.64e-44	6.87e-75	0.550061	0.561	0.221	1.64e-70	2.76e-17	4.12e-74
Radial Glia	6	MIS18BP1	5.54e-19	0.77512	0.362	0.159	1.32e-14	2.22e-23	1.0133	0.375	0.171	5.3e-19	2.28e-38	0.734625	0.486	0.198	5.45e-34	2.16e-27	0.568838	0.504	0.267	5.16e-23	3.09e-31	0.465059	0.5	0.269	7.38e-27	1.43e-73	0.716621	0.498	0.194	3.42e-69	5.54e-19	8.59e-73
Radial Glia	6	KIF20B	2.89e-07	0.560825	0.271	0.157	0.00689465	1.06e-07	0.640765	0.275	0.174	0.00253184	6.59e-28	0.689824	0.448	0.206	1.57e-23	6.11e-22	0.565831	0.47	0.263	1.46e-17	7.61e-36	0.470791	0.516	0.263	1.82e-31	1.73e-69	0.585234	0.48	0.189	4.12e-65	2.89e-07	1.04e-68
Radial Glia	6	DEK	1.59e-14	0.782426	0.742	0.714	3.79e-10	3.46e-13	0.708376	0.715	0.722	8.25e-09	3.18e-29	0.715976	0.831	0.829	7.58e-25	1.53e-48	0.688323	0.94	0.836	3.66e-44	1.7e-50	0.565717	0.933	0.814	4.06e-46	9.47e-69	0.661805	0.911	0.778	2.26e-64	3.46e-13	5.68e-68
Radial Glia	6	HSP90AA1	1.17e-21	1.05919	0.971	0.97	2.79e-17	7.62e-28	0.934441	0.987	0.973	1.82e-23	3.04e-19	0.40227	0.956	0.985	7.25e-15	6.33e-42	0.605982	0.984	0.989	1.51e-37	4.21e-67	0.585775	0.99	0.989	1e-62	1.37e-26	0.3028	0.97	0.979	3.28e-22	3.04e-19	2.53e-66
Radial Glia	6	CENPH	1.45e-15	0.649496	0.442	0.245	3.47e-11	2.46e-17	0.596884	0.414	0.228	5.88e-13	4.49e-43	0.584255	0.602	0.273	1.07e-38	4.38e-50	0.722755	0.742	0.396	1.05e-45	7.03e-55	0.570487	0.714	0.402	1.68e-50	9.55e-67	0.535891	0.569	0.26	2.28e-62	1.45e-15	5.73e-66
Radial Glia	6	CKAP2L	3.98e-31	0.738494	0.254	0.063	9.5e-27	5.97e-50	0.898723	0.307	0.072	1.42e-45	6.61e-32	0.494753	0.354	0.125	1.58e-27	1.75e-21	0.529905	0.3	0.134	4.18e-17	4.03e-34	0.375269	0.327	0.133	9.63e-30	8.95e-66	0.54246	0.35	0.112	2.14e-61	1.75e-21	5.37e-65
Radial Glia	6	CENPW	2.3e-16	0.53868	0.262	0.101	5.49e-12	5.52e-13	0.441796	0.227	0.103	1.32e-08	1.07e-27	0.770269	0.589	0.349	2.55e-23	1.56e-49	0.739	0.634	0.311	3.72e-45	1.03e-65	0.699998	0.661	0.331	2.45e-61	2.03e-64	0.6496	0.583	0.285	4.85e-60	5.52e-13	6.16e-65
Radial Glia	6	HSP90B1	1.3e-16	0.985964	0.729	0.689	3.1e-12	5.03e-15	0.958804	0.693	0.629	1.2e-10	3.65e-30	0.670669	0.865	0.876	8.71e-26	1.88e-31	0.53588	0.922	0.868	4.5e-27	1.92e-45	0.524882	0.929	0.879	4.58e-41	9.65e-65	0.662517	0.917	0.864	2.3e-60	5.03e-15	5.79e-64
Radial Glia	6	BANF1	1.93e-06	0.557204	0.654	0.63	0.0460496	0.000879552	0.543381	0.599	0.636	1	3.33e-22	0.534607	0.821	0.879	7.94e-18	7.38e-50	0.666616	0.911	0.854	1.76e-45	7.9e-64	0.605603	0.925	0.842	1.89e-59	1.27e-43	0.577063	0.876	0.82	3.04e-39	0.000879552	4.74e-63
Radial Glia	6	MND1	6.64e-33	0.739504	0.354	0.11	1.58e-28	3.66e-32	0.580643	0.317	0.106	8.74e-28	1.28e-35	0.53339	0.436	0.169	3.05e-31	6.68e-44	0.64322	0.538	0.246	1.6e-39	1.55e-63	0.62873	0.596	0.267	3.7e-59	2.35e-61	0.504636	0.417	0.163	5.6e-57	3.66e-32	9.3e-63
Radial Glia	6	SGOL1	1.15e-26	0.556814	0.279	0.082	2.74e-22	6.15e-22	0.586754	0.239	0.082	1.47e-17	1.16e-28	0.689644	0.414	0.177	2.78e-24	1.1e-19	0.446099	0.381	0.202	2.62e-15	2.32e-40	0.509416	0.435	0.2	5.55e-36	4.27e-63	0.660672	0.442	0.171	1.02e-58	1.1e-19	2.56e-62
Radial Glia	6	KPNA2	7.18e-12	1.69181	0.629	0.555	1.71e-07	3.82e-29	1.88086	0.667	0.535	9.12e-25	3.71e-33	1.39338	0.831	0.699	8.86e-29	3.17e-27	1.20801	0.789	0.659	7.57e-23	8.7e-50	1.21692	0.829	0.643	2.08e-45	3.54e-61	1.17501	0.85	0.676	8.44e-57	7.18e-12	2.12e-60
Radial Glia	6	AURKA	1.54e-29	0.801011	0.271	0.073	3.68e-25	1.44e-45	1.00312	0.317	0.083	3.43e-41	1.76e-24	0.629391	0.301	0.115	4.19e-20	5.01e-31	0.588813	0.324	0.124	1.2e-26	2.44e-29	0.342162	0.316	0.137	5.83e-25	1.06e-59	0.598318	0.315	0.101	2.52e-55	1.76e-24	6.33e-59
Radial Glia	6	CDCA3	3.07e-13	0.487379	0.196	0.071	7.32e-09	7.61e-25	0.834275	0.233	0.074	1.82e-20	3.57e-29	0.825981	0.335	0.127	8.53e-25	1.17e-37	0.873327	0.358	0.136	2.79e-33	5.86e-47	0.74975	0.375	0.148	1.4e-42	1.08e-59	0.72562	0.328	0.11	2.59e-55	3.07e-13	6.5e-59
Radial Glia	6	DTYMK	0.0134187	0.353636	0.338	0.287	1	5.15e-10	0.595503	0.398	0.271	1.23e-05	4.38e-36	0.900271	0.708	0.515	1.05e-31	2.5e-45	0.717673	0.762	0.513	5.97e-41	7.32e-53	0.650571	0.727	0.464	1.75e-48	1.1e-59	0.710497	0.716	0.472	2.62e-55	0.0134187	6.58e-59
Radial Glia	6	LSM4	3.62e-06	0.52062	0.633	0.6	0.0865266	1.43e-05	0.525722	0.618	0.606	0.342562	1.87e-27	0.648424	0.818	0.825	4.45e-23	1.94e-41	0.623393	0.919	0.84	4.64e-37	5.79e-46	0.511146	0.914	0.847	1.38e-41	3.36e-59	0.677325	0.888	0.789	8.03e-55	1.43e-05	2.02e-58
Radial Glia	6	PTMS	2.02e-46	1.23632	0.896	0.854	4.83e-42	1.79e-45	1.24921	0.819	0.86	4.26e-41	3.49e-47	0.623201	0.94	0.974	8.32e-43	4.03e-33	0.508477	0.943	0.955	9.63e-29	8.48e-59	0.546212	0.975	0.953	2.02e-54	7.07e-56	0.518181	0.957	0.96	1.69e-51	4.03e-33	5.09e-58
Radial Glia	6	HNRNPM	0.0403853	0.46178	0.542	0.558	1	0.299535	0.384666	0.45	0.472	1	1.06e-18	0.564068	0.821	0.884	2.52e-14	1.38e-44	0.706742	0.883	0.805	3.31e-40	2e-58	0.648933	0.904	0.78	4.77e-54	1.27e-58	0.66898	0.911	0.873	3.03e-54	0.299535	7.61e-58
Radial Glia	6	HDGF	9.33e-24	1.16449	0.692	0.557	2.23e-19	1.49e-23	1.06222	0.638	0.528	3.55e-19	9.85e-39	0.842619	0.793	0.736	2.35e-34	2.12e-57	0.790532	0.856	0.654	5.07e-53	3.45e-53	0.599876	0.837	0.655	8.23e-49	1.65e-57	0.691572	0.833	0.707	3.94e-53	1.49e-23	9.9e-57
Radial Glia	6	RAD21	1.97e-19	1.02005	0.717	0.682	4.7e-15	5.46e-18	0.889577	0.702	0.664	1.3e-13	3.15e-34	1.02007	0.824	0.771	7.52e-30	4.45e-27	0.668039	0.849	0.731	1.06e-22	5.45e-21	0.51707	0.808	0.678	1.3e-16	5.17e-57	0.793564	0.835	0.704	1.23e-52	5.46e-18	3.1e-56
Radial Glia	6	CCDC34	1.5e-20	0.931096	0.554	0.344	3.58e-16	1.37e-11	0.612518	0.424	0.269	3.28e-07	1.24e-21	0.62059	0.655	0.462	2.96e-17	1.11e-51	0.764028	0.786	0.494	2.66e-47	5.05e-54	0.665981	0.769	0.51	1.21e-49	5.3e-53	0.660158	0.632	0.366	1.26e-48	1.37e-11	3.03e-53
Radial Glia	6	ANP32B	1.21e-16	0.808377	0.721	0.65	2.88e-12	1.6e-13	0.770033	0.676	0.644	3.83e-09	1.17e-21	0.645825	0.787	0.792	2.79e-17	1.04e-51	0.721063	0.901	0.804	2.48e-47	1.36e-51	0.588928	0.92	0.825	3.24e-47	1.45e-47	0.623838	0.856	0.753	3.46e-43	1.6e-13	6.22e-51
Radial Glia	6	KIF22	0.00710685	0.407715	0.204	0.145	1	2.59e-08	0.44535	0.23	0.125	0.000619439	4.37e-30	0.854806	0.561	0.311	1.04e-25	1.46e-21	0.614999	0.444	0.264	3.48e-17	1.91e-42	0.62509	0.524	0.272	4.56e-38	2.93e-51	0.656032	0.53	0.272	6.99e-47	0.00710685	1.76e-50
Radial Glia	6	SPA17	8.52e-18	0.82918	0.342	0.153	2.03e-13	2.25e-21	0.629777	0.353	0.161	5.36e-17	2.05e-22	0.599707	0.589	0.388	4.9e-18	1.24e-37	0.566158	0.572	0.31	2.97e-33	7.36e-50	0.510402	0.59	0.314	1.76e-45	8.25e-44	0.517313	0.587	0.353	1.97e-39	8.52e-18	4.42e-49
Radial Glia	6	NASP	6.95e-06	0.619059	0.65	0.614	0.165969	0.00059858	0.581859	0.583	0.568	1	9.93e-37	0.862049	0.871	0.9	2.37e-32	3.51e-37	0.714551	0.914	0.869	8.38e-33	5.29e-48	0.636686	0.941	0.862	1.26e-43	2.93e-49	0.612055	0.916	0.869	6.99e-45	0.00059858	1.76e-48
Radial Glia	6	HMGN3	2.3e-06	0.625396	0.571	0.517	0.0548117	7.91e-08	0.748288	0.57	0.52	0.00188844	1.46e-20	0.591421	0.821	0.792	3.49e-16	1.85e-36	0.631879	0.875	0.79	4.42e-32	8.19e-48	0.574588	0.904	0.78	1.95e-43	1.41e-36	0.54518	0.835	0.733	3.37e-32	2.3e-06	4.91e-47
Radial Glia	6	CKAP5	1.67e-13	0.97384	0.525	0.361	3.99e-09	6.11e-20	1.04346	0.518	0.337	1.46e-15	3.57e-21	0.707084	0.627	0.429	8.53e-17	8.67e-20	0.58035	0.593	0.406	2.07e-15	2.68e-23	0.530268	0.569	0.377	6.39e-19	5.34e-47	0.615885	0.622	0.381	1.27e-42	1.67e-13	3.2e-46
Radial Glia	6	TMPO	1.16e-10	0.867014	0.65	0.586	2.76e-06	1.39e-10	0.908313	0.618	0.556	3.32e-06	7.98e-23	0.810855	0.812	0.687	1.9e-18	3.46e-16	0.429647	0.854	0.723	8.27e-12	3.45e-25	0.496775	0.825	0.654	8.23e-21	1.81e-46	0.639598	0.809	0.605	4.31e-42	1.39e-10	1.08e-45
Radial Glia	6	RP3-395M20,12	0.00584912	0.492756	0.288	0.229	1	9.99e-05	0.531673	0.285	0.208	1	1.22e-22	0.726187	0.339	0.148	2.92e-18	8.74e-27	0.978136	0.561	0.338	2.09e-22	1.01e-17	0.560987	0.508	0.35	2.41e-13	5.06e-46	0.760247	0.389	0.171	1.21e-41	0.00584912	3.04e-45
Radial Glia	6	LBR	7.98e-05	0.570881	0.488	0.424	1	1.27e-10	0.720581	0.476	0.365	3.04e-06	1.72e-20	0.666962	0.674	0.496	4.1e-16	8.24e-29	0.613579	0.695	0.476	1.97e-24	9.16e-41	0.568592	0.678	0.427	2.19e-36	1.76e-44	0.587763	0.668	0.436	4.19e-40	7.98e-05	1.05e-43
Radial Glia	6	MZT1	1.9e-14	1.10795	0.5	0.337	4.54e-10	1.76e-34	1.26223	0.544	0.293	4.2e-30	4.71e-22	0.699669	0.636	0.475	1.12e-17	5.28e-31	0.646355	0.645	0.416	1.26e-26	4.65e-44	0.622224	0.669	0.411	1.11e-39	2.84e-29	0.614631	0.569	0.409	6.78e-25	1.9e-14	2.79e-43
Radial Glia	6	RBMX	1.83e-24	0.723001	0.875	0.875	4.37e-20	4.58e-19	0.71292	0.748	0.823	1.09e-14	3.68e-28	0.524448	0.887	0.955	8.79e-24	5.45e-36	0.558382	0.924	0.903	1.3e-31	1.59e-41	0.490172	0.939	0.885	3.79e-37	1e-36	0.411988	0.954	0.965	2.39e-32	4.58e-19	9.53e-41
Radial Glia	6	LMNB1	6.04e-11	0.898499	0.454	0.308	1.44e-06	4.16e-06	0.568806	0.346	0.249	0.0993516	2.37e-21	0.554532	0.674	0.467	5.66e-17	1.71e-26	0.593628	0.695	0.453	4.07e-22	3.43e-29	0.39284	0.633	0.403	8.18e-25	1.29e-33	0.476997	0.634	0.423	3.09e-29	4.16e-06	7.77e-33
Radial Glia	7	OTX2	9.63e-107	0.738639	0.448	0.092	2.3e-102	2.89e-74	0.52212	0.555	0.234	6.89e-70	1.95e-142	0.798621	0.553	0.061	4.65e-138	2.73e-45	0.443988	0.542	0.281	6.52e-41	9.58e-79	0.631257	0.478	0.134	2.29e-74	8.6e-191	0.751356	0.432	0.022	2.05e-186	2.73e-45	5.16e-190
Radial Glia	7	EFNA5	1.3e-56	0.752771	0.434	0.151	3.1e-52	6.89e-71	0.682657	0.472	0.196	1.64e-66	6.97e-112	1.56801	0.832	0.227	1.66e-107	7.4e-46	0.68446	0.608	0.363	1.77e-41	1.5e-98	1.12735	0.693	0.267	3.59e-94	1.02e-147	2.03838	0.827	0.133	2.43e-143	7.4e-46	6.1e-147
Radial Glia	7	RASAL2	7.14e-106	1.1856	0.724	0.301	1.7e-101	1.61e-127	0.967734	0.688	0.306	3.85e-123	3.57e-61	1.1124	0.8	0.375	8.51e-57	1.62e-59	0.667789	0.681	0.437	3.86e-55	1.38e-60	0.865833	0.671	0.369	3.3e-56	2.13e-21	0.968684	0.583	0.307	5.08e-17	2.13e-21	9.67e-127
Radial Glia	7	RPS19	1.07e-22	0.348053	0.998	0.995	2.56e-18	2.44e-40	0.377921	1	0.994	5.82e-36	6.45e-48	0.635512	1	0.99	1.54e-43	5.18e-116	0.534491	1	0.997	1.24e-111	4.15e-46	0.345058	1	0.998	9.92e-42	1.77e-32	0.633154	1	0.985	4.23e-28	1.07e-22	3.11e-115
Radial Glia	7	RPS27A	7.48e-25	0.325243	0.995	0.982	1.79e-20	2.63e-36	0.31654	1	0.98	6.27e-32	1.44e-32	0.4573	1	0.988	3.44e-28	1.7e-112	0.480455	1	0.994	4.07e-108	1.92e-26	0.26012	1	0.995	4.59e-22	7.46e-25	0.457347	0.993	0.984	1.78e-20	7.48e-25	1.02e-111
Radial Glia	7	RPS25	2.04e-19	0.278167	0.974	0.977	4.87e-15	6.69e-27	0.263921	0.99	0.976	1.6e-22	1.97e-38	0.548022	1	0.981	4.7e-34	3.34e-103	0.504326	0.998	0.987	7.98e-99	3.71e-23	0.262423	1	0.989	8.87e-19	3.39e-23	0.490659	0.978	0.97	8.08e-19	2.04e-19	2.01e-102
Radial Glia	7	ADAMTS6	5.89e-68	0.977979	0.568	0.237	1.41e-63	5.38e-103	0.808651	0.642	0.292	1.29e-98	9.24e-30	0.677025	0.421	0.153	2.2e-25	3e-48	0.500786	0.44	0.205	7.17e-44	8.84e-27	0.447254	0.387	0.189	2.11e-22	5.66e-40	0.672784	0.453	0.114	1.35e-35	8.84e-27	3.23e-102
Radial Glia	7	PTPRZ1	2.89e-62	0.993858	0.839	0.547	6.89e-58	5.06e-97	0.820744	0.846	0.541	1.21e-92	2.69e-56	1.12517	0.868	0.488	6.43e-52	7.98e-42	0.525952	0.804	0.581	1.91e-37	3.38e-05	0.277168	0.586	0.529	0.807377	1.67e-26	1.19478	0.748	0.415	4e-22	3.38e-05	3.04e-96
Radial Glia	7	RUNX1T1	2.32e-79	0.888244	0.624	0.232	5.54e-75	6.38e-89	0.805317	0.649	0.305	1.52e-84	7.37e-58	1.07149	0.837	0.32	1.76e-53	4.28e-57	0.653574	0.674	0.36	1.02e-52	3.59e-72	0.862889	0.533	0.176	8.56e-68	4.17e-52	1.37896	0.734	0.229	9.95e-48	4.17e-52	3.83e-88
Radial Glia	7	TMEM38B	1.62e-56	0.882228	0.712	0.433	3.86e-52	9.58e-88	0.754321	0.759	0.459	2.29e-83	1.37e-35	0.864818	0.595	0.272	3.28e-31	2.32e-39	0.537602	0.64	0.438	5.55e-35	7.79e-33	0.6531	0.641	0.435	1.86e-28	4.05e-09	0.45194	0.388	0.219	9.67e-05	4.05e-09	5.75e-87
Radial Glia	7	PGM5	1.43e-61	0.42414	0.206	0.034	3.4e-57	2.89e-82	0.496138	0.301	0.076	6.9e-78	4.28e-59	0.402119	0.247	0.029	1.02e-54	1.39e-65	0.54267	0.396	0.137	3.32e-61	3.76e-36	0.315357	0.169	0.036	8.97e-32	2.22e-84	0.394754	0.194	0.01	5.3e-80	3.76e-36	1.33e-83
Radial Glia	7	RPS2	7.71e-22	0.353776	0.993	0.989	1.84e-17	7.35e-30	0.312604	0.999	0.989	1.76e-25	1.06e-48	0.681591	1	0.987	2.54e-44	6.43e-83	0.472385	1	0.997	1.54e-78	1.15e-26	0.280337	1	0.998	2.74e-22	1.14e-31	0.637549	0.993	0.987	2.72e-27	7.71e-22	3.86e-82
Radial Glia	7	RPLP0	2.61e-22	0.342053	0.983	0.973	6.23e-18	1.22e-32	0.33007	0.991	0.969	2.9e-28	7.07e-42	0.576804	1	0.981	1.69e-37	1.86e-81	0.463017	1	0.987	4.45e-77	3e-25	0.283912	1	0.988	7.15e-21	3.88e-29	0.576043	0.993	0.976	9.27e-25	2.61e-22	1.12e-80
Radial Glia	7	RPS15	3.63e-30	0.432718	0.983	0.983	8.65e-26	7.52e-36	0.354375	0.997	0.98	1.79e-31	8.06e-66	0.708142	1	0.99	1.92e-61	1.78e-75	0.422384	1	0.994	4.24e-71	4.64e-24	0.25308	1	0.995	1.11e-19	4.56e-34	0.654081	0.993	0.985	1.09e-29	4.64e-24	1.07e-74
Radial Glia	7	CCND1	9.65e-32	0.544181	0.806	0.551	2.3e-27	1.55e-71	0.70671	0.822	0.518	3.71e-67	2.52e-61	1.40369	0.905	0.496	6.01e-57	9.84e-74	0.805282	0.902	0.617	2.35e-69	2.08e-62	0.928685	0.892	0.606	4.97e-58	9.42e-47	1.39963	0.914	0.489	2.25e-42	9.65e-32	5.91e-73
Radial Glia	7	SOX21	1.81e-13	0.338151	0.329	0.194	4.32e-09	1.33e-73	0.683115	0.407	0.149	3.17e-69	1.72e-29	0.553845	0.4	0.137	4.11e-25	7.1e-60	0.5477	0.492	0.222	1.7e-55	1.14e-24	0.437397	0.423	0.226	2.72e-20	8.74e-36	0.514782	0.324	0.064	2.09e-31	1.81e-13	7.96e-73
Radial Glia	7	RPL10A	8.77e-15	0.272883	0.974	0.96	2.09e-10	6.24e-33	0.314044	0.991	0.956	1.49e-28	2.01e-27	0.465234	1	0.98	4.81e-23	2.05e-71	0.4714	0.998	0.98	4.89e-67	4.86e-20	0.262895	0.997	0.984	1.16e-15	6.72e-21	0.506998	0.978	0.973	1.6e-16	8.77e-15	1.23e-70
Radial Glia	7	LINC01158	1.86e-22	0.59036	0.722	0.522	4.44e-18	7.17e-63	0.72901	0.687	0.416	1.71e-58	1.36e-70	1.43615	0.932	0.546	3.24e-66	3.36e-60	0.760748	0.809	0.551	8.02e-56	1e-14	0.40993	0.666	0.521	2.39e-10	4.21e-39	1.47248	0.856	0.517	1.01e-34	1e-14	8.14e-70
Radial Glia	7	PAX7	1.7e-10	0.325742	0.353	0.237	4.07e-06	1.27e-34	0.400203	0.338	0.162	3.02e-30	3.07e-70	0.559108	0.379	0.059	7.33e-66	3.16e-10	0.259145	0.285	0.198	7.54e-06	8.85e-09	0.257559	0.254	0.158	0.000211232	6.61e-22	0.383127	0.237	0.053	1.58e-17	8.85e-09	1.84e-69
Radial Glia	7	AK4	1.84e-29	0.679672	0.506	0.295	4.39e-25	5.59e-70	0.639503	0.546	0.262	1.33e-65	1.13e-43	0.760312	0.542	0.187	2.71e-39	4.84e-56	0.593708	0.579	0.314	1.16e-51	3.73e-63	0.71019	0.564	0.236	8.9e-59	1.32e-29	0.761467	0.511	0.18	3.14e-25	1.84e-29	3.35e-69
Radial Glia	7	BTG1	6.51e-30	0.749393	0.878	0.772	1.55e-25	1.02e-56	0.652752	0.92	0.765	2.43e-52	9.29e-17	0.60744	0.995	0.924	2.22e-12	9.72e-69	0.722221	0.992	0.926	2.32e-64	1.17e-43	0.638312	0.981	0.913	2.79e-39	2.1e-06	0.472464	0.957	0.932	0.0500346	2.1e-06	5.83e-68
Radial Glia	7	LIX1	1.91e-17	0.318535	0.175	0.067	4.56e-13	1.85e-34	0.342826	0.299	0.128	4.42e-30	4.85e-21	0.54327	0.4	0.166	1.16e-16	1.95e-40	0.500317	0.46	0.234	4.65e-36	2.16e-67	0.754628	0.506	0.172	5.16e-63	9.16e-16	0.514158	0.331	0.12	2.19e-11	9.16e-16	1.3e-66
Radial Glia	7	BOC	8.1e-21	0.423882	0.693	0.48	1.93e-16	1.66e-50	0.480997	0.672	0.398	3.95e-46	6.52e-66	1.0936	0.784	0.328	1.56e-61	6.21e-16	0.34683	0.587	0.469	1.48e-11	3.02e-09	0.289101	0.594	0.518	7.21e-05	8.68e-37	1.1694	0.662	0.275	2.07e-32	3.02e-09	3.91e-65
Radial Glia	7	FUT9	2.97e-35	0.436772	0.3	0.103	7.09e-31	1.25e-51	0.500501	0.372	0.153	2.98e-47	2.31e-36	0.433348	0.289	0.063	5.52e-32	9.41e-24	0.401344	0.336	0.181	2.25e-19	4.19e-65	0.535097	0.348	0.088	1e-60	1.08e-28	0.34105	0.216	0.036	2.57e-24	9.41e-24	2.51e-64
Radial Glia	7	NCKAP5	1.24e-23	0.601537	0.516	0.32	2.97e-19	1.2e-60	0.680364	0.555	0.284	2.87e-56	4.55e-09	0.415714	0.495	0.349	0.000108527	2.18e-13	0.330988	0.462	0.343	5.2e-09	6.51e-21	0.464155	0.459	0.273	1.55e-16	0.000383053	0.42556	0.388	0.293	1	0.000383053	7.23e-60
Radial Glia	7	CDK6	7.75e-19	0.402133	0.285	0.138	1.85e-14	1.28e-25	0.347621	0.346	0.191	3.05e-21	2.57e-60	0.951353	0.595	0.176	6.14e-56	1.15e-20	0.33851	0.492	0.338	2.75e-16	2.95e-24	0.460917	0.448	0.249	7.03e-20	1.84e-42	0.982268	0.54	0.159	4.39e-38	7.75e-19	1.54e-59
Radial Glia	7	ZFP36L1	2.52e-41	0.781936	0.806	0.544	6.01e-37	1.48e-57	0.668682	0.806	0.541	3.54e-53	5e-08	0.272516	0.905	0.636	0.00119427	1.75e-36	0.445222	0.909	0.654	4.19e-32	4.61e-14	0.314556	0.928	0.748	1.1e-09	9.24e-08	0.309724	0.885	0.624	0.00220664	9.24e-08	8.89e-57
Radial Glia	7	MSI2	3.73e-11	0.403811	0.722	0.619	8.9e-07	2.15e-56	0.638384	0.813	0.604	5.13e-52	5.93e-29	0.709349	0.868	0.624	1.42e-24	1.19e-40	0.591033	0.76	0.597	2.83e-36	7.45e-39	0.685038	0.754	0.534	1.78e-34	1.63e-11	0.756316	0.719	0.561	3.88e-07	3.73e-11	1.29e-55
Radial Glia	7	TFDP2	7.23e-21	0.518155	0.741	0.582	1.72e-16	3.41e-37	0.467674	0.794	0.607	8.14e-33	1.79e-30	0.900165	0.837	0.631	4.28e-26	2.96e-56	0.660802	0.849	0.629	7.08e-52	1.88e-16	0.488964	0.693	0.6	4.48e-12	1.26e-05	0.404753	0.676	0.596	0.301549	1.26e-05	1.78e-55
Radial Glia	7	IRX3	1.52e-07	0.30663	0.494	0.401	0.00363285	1.6e-22	0.300229	0.438	0.28	3.81e-18	1.07e-55	0.85963	0.6	0.188	2.56e-51	5.46e-27	0.422891	0.623	0.439	1.3e-22	7.57e-15	0.371814	0.627	0.502	1.81e-10	6.08e-49	0.871943	0.489	0.112	1.45e-44	1.52e-07	6.43e-55
Radial Glia	7	RPL7	1.62e-15	0.263627	0.988	0.97	3.87e-11	1.95e-31	0.293477	0.999	0.967	4.66e-27	4.78e-24	0.435099	1	0.966	1.14e-19	1.9e-55	0.392432	1	0.983	4.53e-51	8.96e-21	0.272393	1	0.989	2.14e-16	7.86e-14	0.391861	0.978	0.967	1.88e-09	7.86e-14	1.14e-54
Radial Glia	7	ANKRD6	3.31e-41	0.670691	0.453	0.205	7.9e-37	1.54e-51	0.578284	0.429	0.205	3.67e-47	8.75e-54	0.858833	0.595	0.201	2.09e-49	5.65e-47	0.506228	0.54	0.297	1.35e-42	3.68e-38	0.598471	0.483	0.238	8.79e-34	1.16e-33	0.838758	0.482	0.149	2.77e-29	1.16e-33	5.25e-53
Radial Glia	7	TOX	5.31e-53	0.732565	0.494	0.208	1.27e-48	2.63e-51	0.501233	0.436	0.208	6.28e-47	3.42e-31	0.724015	0.574	0.269	8.18e-27	1.22e-08	0.272923	0.34	0.263	0.000290188	3.81e-21	0.439551	0.384	0.211	9.1e-17	2.05e-23	0.785427	0.525	0.224	4.88e-19	1.22e-08	3.18e-52
Radial Glia	7	LINC00461	1.32e-18	0.539595	0.633	0.454	3.16e-14	3.1e-31	0.446461	0.614	0.408	7.4e-27	2.46e-50	1.14893	0.884	0.497	5.87e-46	8.7e-53	0.640238	0.749	0.47	2.08e-48	4.5e-19	0.525661	0.599	0.428	1.08e-14	2.63e-30	1.16701	0.842	0.468	6.27e-26	1.32e-18	5.22e-52
Radial Glia	7	MUM1	3.17e-30	0.757248	0.614	0.427	7.56e-26	2.4e-52	0.719161	0.657	0.428	5.74e-48	6.22e-26	0.744609	0.837	0.662	1.49e-21	1.01e-10	0.259065	0.553	0.477	2.4e-06	5.68e-06	0.309672	0.406	0.348	0.13568	0.0922692	0.258756	0.604	0.639	1	0.0922692	1.44e-51
Radial Glia	7	FAM181A	3.25e-14	0.36663	0.288	0.161	7.77e-10	1.69e-39	0.429331	0.306	0.129	4.03e-35	2.18e-38	0.858423	0.568	0.232	5.2e-34	4.34e-48	0.607446	0.606	0.36	1.04e-43	2.7e-24	0.543984	0.575	0.384	6.44e-20	5.75e-27	0.68861	0.468	0.162	1.37e-22	3.25e-14	2.6e-47
Radial Glia	7	BCKDHB	1.99e-14	0.337968	0.197	0.089	4.74e-10	2.19e-20	0.251847	0.232	0.115	5.23e-16	1.69e-47	0.779219	0.626	0.246	4.03e-43	1.51e-25	0.41202	0.455	0.286	3.61e-21	2.73e-33	0.544626	0.47	0.236	6.52e-29	1.4e-24	0.77376	0.489	0.19	3.34e-20	1.99e-14	1.01e-46
Radial Glia	7	NFIB	1.96e-47	0.465158	0.281	0.076	4.67e-43	9.47e-24	0.267392	0.294	0.152	2.26e-19	4.07e-09	0.345577	0.558	0.39	9.72e-05	3.65e-14	0.263594	0.419	0.29	8.71e-10	1.08e-10	0.275007	0.312	0.189	2.59e-06	1.13e-13	0.526929	0.568	0.329	2.7e-09	4.07e-09	1.17e-46
Radial Glia	7	MARCKS	8.66e-28	0.469363	0.971	0.921	2.07e-23	2.44e-29	0.336229	0.978	0.909	5.83e-25	6.28e-41	0.694351	1	0.976	1.5e-36	5.35e-30	0.320112	1	0.979	1.28e-25	1.83e-24	0.358216	0.997	0.975	4.36e-20	8.11e-27	0.669611	1	0.971	1.94e-22	1.83e-24	3.77e-40
Radial Glia	7	CACHD1	6.75e-05	0.296929	0.355	0.296	1	7.47e-28	0.428585	0.497	0.33	1.78e-23	7.08e-23	0.587688	0.616	0.366	1.69e-18	2.66e-40	0.524183	0.647	0.44	6.34e-36	4.1e-38	0.585801	0.61	0.36	9.79e-34	2.47e-08	0.45273	0.46	0.295	0.000589364	6.75e-05	1.59e-39
Radial Glia	7	ASCC3	1.09e-08	0.338929	0.537	0.445	0.000260274	4.13e-36	0.527938	0.59	0.393	9.86e-32	5.32e-13	0.579009	0.5	0.33	1.27e-08	2.36e-11	0.351092	0.475	0.395	5.64e-07	2.67e-09	0.351995	0.525	0.442	6.37e-05	9.62e-08	0.494842	0.46	0.304	0.00229635	9.62e-08	2.48e-35
Radial Glia	7	RPS6	1.12e-11	0.272491	0.986	0.979	2.66e-07	7.66e-25	0.314305	0.997	0.979	1.83e-20	4.77e-35	0.518373	1	0.985	1.14e-30	1.01e-35	0.300362	1	0.993	2.41e-31	3.51e-23	0.271163	1	0.997	8.37e-19	1.49e-18	0.440373	0.993	0.98	3.55e-14	1.12e-11	6.07e-35
Radial Glia	7	RPS27L	2.27e-10	0.38283	0.806	0.765	5.42e-06	3.35e-21	0.404635	0.857	0.766	7.99e-17	1.92e-24	0.768874	0.958	0.844	4.59e-20	6.98e-35	0.535124	0.934	0.839	1.67e-30	3.97e-28	0.524515	0.95	0.883	9.47e-24	3.44e-12	0.587911	0.928	0.839	8.21e-08	2.27e-10	4.19e-34
Radial Glia	7	TTYH1	4.96e-19	0.422879	0.825	0.638	1.18e-14	1.42e-29	0.354963	0.8	0.599	3.38e-25	2.96e-16	0.525256	0.953	0.727	7.06e-12	1.54e-18	0.261152	0.921	0.715	3.67e-14	4.58e-12	0.252936	0.936	0.779	1.09e-07	1.55e-05	0.2842	0.921	0.735	0.369961	1.55e-05	8.5e-29
Radial Glia	7	FZD3	2.74e-17	0.474269	0.739	0.625	6.53e-13	7.84e-28	0.3922	0.777	0.625	1.87e-23	1.44e-15	0.50787	0.889	0.813	3.45e-11	2.44e-19	0.3558	0.83	0.727	5.82e-15	1.84e-25	0.546626	0.84	0.701	4.39e-21	0.00116711	0.335345	0.763	0.755	1	0.00116711	4.71e-27
Radial Glia	7	POU3F3	3.9e-08	0.277815	0.506	0.411	0.000931268	1.7e-21	0.322216	0.529	0.376	4.05e-17	1.16e-23	0.641917	0.574	0.319	2.76e-19	8.24e-19	0.359611	0.498	0.368	1.97e-14	5.68e-15	0.392763	0.475	0.332	1.36e-10	3.57e-15	0.589699	0.482	0.238	8.51e-11	3.9e-08	6.93e-23
Radial Glia	7	GLI3	7.13e-17	0.382523	0.439	0.285	1.7e-12	9.31e-22	0.32607	0.409	0.262	2.22e-17	1.02e-10	0.44776	0.511	0.364	2.44e-06	9.02e-11	0.252385	0.481	0.387	2.15e-06	2.97e-09	0.290878	0.467	0.359	7.1e-05	4.02e-10	0.515123	0.496	0.31	9.6e-06	2.97e-09	5.58e-21
Radial Glia	7	MDM2	2.17e-07	0.300408	0.525	0.436	0.00517264	9.48e-13	0.288996	0.504	0.395	2.26e-08	0.00274472	0.312512	0.4	0.367	1	1.34e-06	0.31238	0.421	0.374	0.0320072	2.07e-06	0.326432	0.434	0.367	0.0493881	0.0135416	0.261625	0.367	0.31	1	0.0135416	5.69e-12
Neurons	8	NRXN1	1.08e-296	1.84055	0.845	0.143	2.57e-292	3.32e-307	1.69804	0.846	0.136	7.92e-303	5.37e-218	1.72482	0.917	0.221	1.28e-213	0	1.74958	0.928	0.206	0	3.36e-258	1.85457	0.889	0.152	8.02e-254	0	1.79931	0.913	0.153	0	5.37e-218	0
Neurons	8	SLC17A6	3.62e-249	1.1199	0.441	0.031	8.65e-245	6.9e-238	0.989985	0.448	0.036	1.65e-233	5.24e-175	1.15971	0.738	0.143	1.25e-170	0	1.08054	0.655	0.083	0	1.3e-231	1.05567	0.523	0.046	3.1e-227	1.08e-225	1.02165	0.682	0.117	2.59e-221	5.24e-175	0
Neurons	8	NRN1	1.42e-241	1.66738	0.541	0.056	3.39e-237	7.53e-276	1.69162	0.729	0.103	1.8e-271	1.2e-163	1.7869	0.767	0.181	2.86e-159	0	1.76147	0.855	0.169	0	2.24e-266	1.66998	0.828	0.115	5.35e-262	1.5e-275	1.95547	0.849	0.177	3.58e-271	1.2e-163	0
Neurons	8	MAPT	5.13e-232	1.72987	0.817	0.182	1.22e-227	3.51e-224	1.66206	0.826	0.199	8.38e-220	1.59e-164	1.62641	0.891	0.297	3.8e-160	0	1.82142	0.912	0.199	0	1.04e-239	1.5657	0.878	0.161	2.47e-235	6.3e-247	1.86653	0.906	0.272	1.5e-242	1.59e-164	0
Neurons	8	ONECUT2	1.8e-227	2.20925	0.696	0.117	4.3e-223	5.32e-266	2.20196	0.763	0.124	1.27e-261	2.07e-122	1.02609	0.565	0.114	4.95e-118	0	2.06261	0.836	0.145	0	1.24e-222	1.58119	0.735	0.108	2.97e-218	3.24e-240	1.2836	0.68	0.118	7.73e-236	2.07e-122	0
Neurons	8	MYT1L	3.07e-225	0.99983	0.485	0.047	7.32e-221	5.25e-186	1.03404	0.492	0.063	1.25e-181	2.64e-144	0.893291	0.62	0.117	6.29e-140	0	1.07322	0.64	0.083	0	3e-251	0.908547	0.545	0.046	7.16e-247	4.77e-236	0.899022	0.576	0.08	1.14e-231	2.64e-144	0
Neurons	8	TTC9B	1.82e-219	1.04188	0.603	0.08	4.35e-215	9.3e-239	1.07647	0.594	0.072	2.22e-234	5.45e-183	1.27031	0.827	0.183	1.3e-178	0	1.43804	0.863	0.144	0	6.09e-278	1.2519	0.767	0.089	1.45e-273	3.09e-258	1.29339	0.789	0.151	7.37e-254	5.45e-183	0
Neurons	8	SYT4	1.57e-205	1.88846	0.688	0.124	3.74e-201	7.13e-198	1.79355	0.721	0.148	1.7e-193	7.01e-81	1.72139	0.565	0.171	1.67e-76	0	2.51209	0.821	0.142	0	3.84e-267	1.91658	0.749	0.094	9.16e-263	1.58e-195	1.60811	0.687	0.152	3.78e-191	7.01e-81	0
Neurons	8	ONECUT1	6.49e-178	1.22635	0.588	0.097	1.55e-173	3.32e-122	0.790304	0.422	0.071	7.93e-118	5.1e-143	0.637017	0.284	0.021	1.22e-138	5.74e-244	1.1284	0.608	0.1	1.37e-239	5.89e-174	1.05642	0.649	0.103	1.41e-169	0	0.742469	0.504	0.04	0	3.32e-122	0
Neurons	8	NSG2	5.49e-208	1.28385	0.704	0.122	1.31e-203	7.88e-205	1.22449	0.646	0.103	1.88e-200	6.03e-120	1.24401	0.85	0.277	1.44e-115	2.25e-306	1.49722	0.832	0.156	5.37e-302	4.03e-278	1.40327	0.81	0.101	9.62e-274	5.14e-196	1.38417	0.886	0.258	1.23e-191	6.03e-120	1.35e-305
Neurons	8	GAP43	3.2e-287	2.50868	0.869	0.166	7.63e-283	9.67e-266	2.26729	0.909	0.21	2.31e-261	1.65e-117	2.11214	0.962	0.646	3.95e-113	1.15e-300	2.62026	0.998	0.375	2.74e-296	4.61e-193	2.65368	1	0.373	1.1e-188	1.68e-155	1.97113	0.968	0.676	4.01e-151	1.65e-117	6.9e-300
Neurons	8	CALY	1.32e-77	0.539006	0.338	0.068	3.15e-73	3.12e-68	0.561296	0.339	0.078	7.45e-64	9.63e-133	1.14215	0.62	0.136	2.3e-128	1.9e-229	1.07282	0.499	0.067	4.53e-225	3.47e-154	1.05822	0.552	0.084	8.28e-150	5.88e-289	1.36698	0.667	0.094	1.4e-284	3.12e-68	3.53e-288
Neurons	8	INA	7e-214	1.72584	0.881	0.221	1.67e-209	9.85e-233	1.66039	0.849	0.183	2.35e-228	3.88e-138	1.55521	0.971	0.39	9.27e-134	1.2e-288	2.04513	0.992	0.329	2.87e-284	2.26e-176	1.88839	0.971	0.322	5.39e-172	3.19e-195	1.67064	0.97	0.374	7.62e-191	3.88e-138	7.23e-288
Neurons	8	RTN1	5.62e-243	1.78825	0.848	0.179	1.34e-238	2.25e-208	1.67322	0.87	0.234	5.37e-204	3.68e-141	1.83478	0.997	0.597	8.79e-137	3.51e-281	2.21113	0.994	0.373	8.38e-277	5.22e-199	2.28171	0.996	0.321	1.25e-194	6.36e-187	1.8673	0.998	0.589	1.52e-182	3.68e-141	2.11e-280
Neurons	8	PCSK1N	5.34e-141	1.4697	0.814	0.295	1.28e-136	2.67e-147	1.39037	0.841	0.299	6.36e-143	8.51e-85	1.13389	0.981	0.764	2.03e-80	3.44e-279	2.04962	0.989	0.345	8.21e-275	2.5e-158	1.98635	0.986	0.386	5.97e-154	8.09e-133	1.31349	0.965	0.701	1.93e-128	8.51e-85	2.06e-278
Neurons	8	STMN2	2.69e-195	2.21624	0.985	0.385	6.41e-191	4.91e-223	2.50629	1	0.37	1.17e-218	1.1e-123	1.8433	1	0.481	2.62e-119	1.26e-271	2.37698	1	0.354	3.01e-267	2.09e-201	2.63079	1	0.281	4.98e-197	6.17e-165	1.89117	0.998	0.505	1.47e-160	1.1e-123	7.57e-271
Neurons	8	CELF4	1.34e-176	1.42446	0.696	0.145	3.19e-172	1.2e-205	1.35111	0.698	0.132	2.86e-201	4.25e-175	1.59244	0.866	0.224	1.02e-170	1.13e-268	1.38341	0.773	0.159	2.7e-264	5.76e-182	1.33836	0.746	0.139	1.37e-177	4.47e-242	1.74134	0.849	0.198	1.07e-237	4.25e-175	6.79e-268
Neurons	8	LHX9	2.9e-148	2.09501	0.394	0.05	6.93e-144	5.64e-228	2.48322	0.706	0.126	1.35e-223	1.93e-64	1.35119	0.732	0.299	4.61e-60	5.4e-256	2.28229	0.747	0.155	1.29e-251	1.79e-181	2.31249	0.663	0.107	4.28e-177	1.95e-32	0.776904	0.605	0.32	4.67e-28	1.95e-32	3.24e-255
Neurons	8	FXYD7	2.53e-243	1.09533	0.665	0.093	6.03e-239	2.28e-120	0.822244	0.513	0.109	5.44e-116	3.44e-155	1.19734	0.783	0.2	8.21e-151	3.93e-253	1.13843	0.716	0.137	9.38e-249	5.59e-178	1.13087	0.674	0.113	1.34e-173	1.35e-194	1.0977	0.752	0.177	3.23e-190	2.28e-120	2.36e-252
Neurons	8	POU4F1	2.67e-157	1.2441	0.384	0.043	6.38e-153	2.43e-205	1.43149	0.43	0.042	5.79e-201	4.12e-52	0.890907	0.399	0.119	9.84e-48	1.47e-249	1.13937	0.451	0.047	3.5e-245	5.33e-225	1.22169	0.455	0.036	1.27e-220	9.52e-69	0.756074	0.333	0.083	2.27e-64	4.12e-52	8.81e-249
Neurons	8	ROBO2	4.31e-106	1.02283	0.505	0.122	1.03e-101	4.51e-182	1.1503	0.542	0.084	1.08e-177	1.16e-47	0.791343	0.562	0.25	2.76e-43	5.68e-248	1.49654	0.716	0.155	1.36e-243	7.4e-100	0.950311	0.606	0.157	1.77e-95	3.78e-32	0.526733	0.454	0.223	9.03e-28	3.78e-32	3.41e-247
Neurons	8	EN1	4.98e-20	0.864301	0.258	0.112	1.19e-15	2.18e-52	0.896402	0.339	0.098	5.21e-48	4.52e-87	0.905456	0.294	0.041	1.08e-82	9.15e-114	1.13648	0.672	0.258	2.18e-109	5.23e-52	0.999025	0.548	0.208	1.25e-47	1.44e-246	1.63373	0.442	0.044	3.43e-242	4.98e-20	8.63e-246
Neurons	8	UCHL1	1.31e-160	1.7856	0.907	0.415	3.12e-156	3.01e-125	1.5558	0.906	0.525	7.17e-121	2.35e-137	1.84357	0.994	0.797	5.61e-133	1.18e-245	2.181	1	0.708	2.83e-241	1.76e-154	2.27999	0.996	0.612	4.2e-150	5.95e-185	1.95702	0.985	0.77	1.42e-180	3.01e-125	7.1e-245
Neurons	8	GRIA2	6.23e-182	1.44213	0.794	0.186	1.49e-177	5.21e-244	1.37767	0.724	0.111	1.24e-239	5.79e-135	0.943036	0.665	0.142	1.38e-130	1.16e-241	0.929399	0.516	0.066	2.78e-237	2.09e-229	0.731045	0.47	0.037	4.99e-225	5.25e-226	0.988277	0.658	0.107	1.25e-221	5.79e-135	3.13e-243
Neurons	8	SCG2	1.03e-190	1.32317	0.523	0.07	2.45e-186	1.29e-151	1.27408	0.638	0.14	3.09e-147	5.7e-105	1.31346	0.642	0.174	1.36e-100	7.86e-240	1.75488	0.657	0.121	1.88e-235	2.18e-139	1.5747	0.584	0.106	5.2e-135	1.18e-188	1.62595	0.685	0.148	2.83e-184	5.7e-105	4.72e-239
Neurons	8	TSPAN7	3.46e-117	0.793779	0.585	0.146	8.26e-113	3.18e-60	0.572763	0.443	0.141	7.59e-56	2.09e-166	1.23933	0.754	0.177	4.99e-162	1.36e-161	0.790835	0.596	0.138	3.26e-157	2.55e-137	1.03197	0.634	0.131	6.09e-133	1.41e-230	1.21094	0.742	0.151	3.37e-226	3.18e-60	8.46e-230
Neurons	8	MAB21L1	2.62e-118	1.62551	0.58	0.15	6.26e-114	2.24e-43	1.12919	0.424	0.169	5.34e-39	8.61e-100	1.53463	0.588	0.162	2.05e-95	2.43e-113	1.39777	0.722	0.298	5.8e-109	3.72e-187	1.6115	0.692	0.114	8.88e-183	4.1e-229	1.75911	0.581	0.091	9.79e-225	2.24e-43	2.46e-228
Neurons	8	GPM6A	4.75e-134	1.72211	0.794	0.309	1.13e-129	9.93e-136	1.67438	0.797	0.304	2.37e-131	4.32e-165	2.13118	0.949	0.398	1.03e-160	8.91e-207	2.00533	0.916	0.454	2.13e-202	6.93e-143	1.84562	0.871	0.31	1.66e-138	5.75e-229	2.35488	0.906	0.314	1.37e-224	4.75e-134	3.45e-228
Neurons	8	NSG1	2.24e-128	1.14549	0.747	0.248	5.35e-124	1.96e-97	0.903379	0.672	0.235	4.69e-93	3.94e-103	1.27366	0.936	0.467	9.4e-99	5.67e-225	1.40761	0.931	0.313	1.35e-220	8.1e-178	1.4697	0.907	0.228	1.93e-173	1.26e-138	1.19822	0.94	0.431	3.02e-134	1.96e-97	3.4e-224
Neurons	8	DPYSL3	3.1e-112	1.37552	0.863	0.417	7.41e-108	1.37e-102	1.17382	0.818	0.357	3.27e-98	1.74e-77	1.00559	0.907	0.518	4.15e-73	5.17e-221	1.66967	0.956	0.429	1.24e-216	9.77e-117	1.40465	0.914	0.425	2.33e-112	1.66e-109	1.0561	0.903	0.502	3.96e-105	1.74e-77	3.1e-220
Neurons	8	SCG5	1.6e-102	1.11591	0.611	0.194	3.83e-98	7.63e-185	1.37765	0.776	0.196	1.82e-180	1.52e-136	1.61604	0.843	0.297	3.64e-132	1.03e-215	1.33587	0.735	0.18	2.45e-211	7.91e-147	1.49746	0.778	0.194	1.89e-142	4.07e-172	1.46086	0.814	0.271	9.73e-168	1.6e-102	6.17e-215
Neurons	8	STMN4	8.11e-83	1.42823	0.776	0.369	1.94e-78	2.06e-100	1.41829	0.818	0.358	4.92e-96	1.66e-123	1.68523	0.955	0.444	3.97e-119	2.05e-213	1.63522	0.96	0.344	4.9e-209	8.1e-166	2.004	0.968	0.306	1.93e-161	7.28e-171	1.76263	0.95	0.426	1.74e-166	8.11e-83	1.23e-212
Neurons	8	CDKN2D	2.48e-81	0.847146	0.678	0.273	5.92e-77	1.4e-114	1.08815	0.75	0.279	3.35e-110	3.77e-95	1.10168	0.866	0.435	8.99e-91	3.69e-212	1.35008	0.901	0.319	8.82e-208	4.27e-146	1.3336	0.889	0.288	1.02e-141	2.65e-130	1.13789	0.876	0.407	6.32e-126	2.48e-81	2.22e-211
Neurons	8	OLFM1	9.35e-138	1.06532	0.683	0.181	2.23e-133	1.32e-150	1.12325	0.716	0.184	3.16e-146	2.41e-82	1.16076	0.776	0.359	5.76e-78	1.02e-211	1.53944	0.878	0.314	2.44e-207	1.18e-105	1.13285	0.781	0.267	2.82e-101	4.89e-149	1.27249	0.826	0.311	1.17e-144	2.41e-82	6.13e-211
Neurons	8	KIF5C	3.63e-127	1.40063	0.925	0.489	8.67e-123	5.03e-127	1.48795	0.888	0.435	1.2e-122	5.25e-104	1.38867	0.968	0.771	1.25e-99	5.89e-211	1.82796	0.979	0.557	1.41e-206	1.25e-136	1.7719	0.971	0.516	2.98e-132	2.84e-141	1.39083	0.963	0.703	6.77e-137	5.25e-104	3.53e-210
Neurons	8	DCX	3.63e-163	1.77235	0.941	0.381	8.66e-159	2.63e-166	1.67967	0.938	0.372	6.29e-162	1.52e-109	1.26188	0.939	0.398	3.63e-105	1.12e-210	1.61515	0.96	0.374	2.68e-206	6.05e-171	2.09911	0.989	0.346	1.45e-166	6.01e-151	1.32848	0.96	0.412	1.43e-146	1.52e-109	6.72e-210
Neurons	8	PGM2L1	6.98e-104	1.18533	0.652	0.22	1.67e-99	1.88e-133	1.23855	0.729	0.229	4.49e-129	1.04e-82	1.0059	0.786	0.366	2.49e-78	2.96e-210	1.37683	0.827	0.263	7.08e-206	4.78e-140	1.20607	0.792	0.216	1.14e-135	8.55e-137	1.13698	0.821	0.325	2.04e-132	1.04e-82	1.78e-209
Neurons	8	RUNX1T1	3.9e-122	1.39871	0.719	0.228	9.31e-118	1.38e-100	1.35669	0.776	0.315	3.29e-96	1.31e-113	1.36821	0.85	0.31	3.13e-109	2.54e-81	0.940558	0.728	0.359	6.07e-77	8.49e-102	1.2457	0.652	0.176	2.03e-97	7.68e-209	1.43292	0.831	0.21	1.83e-204	2.54e-81	4.61e-208
Neurons	8	EBF1	3.31e-169	1.55199	0.523	0.084	7.89e-165	7.18e-174	1.52254	0.599	0.111	1.71e-169	4.73e-56	1.24516	0.693	0.334	1.13e-51	2.95e-203	1.0904	0.691	0.151	7.05e-199	3.28e-163	1.22242	0.677	0.122	7.84e-159	3.81e-88	1.17368	0.712	0.303	9.09e-84	4.73e-56	1.77e-202
Neurons	8	TUBB2A	1.14e-103	1.42819	0.91	0.609	2.72e-99	5.67e-132	1.59146	0.938	0.584	1.35e-127	3.72e-106	1.34345	0.99	0.892	8.89e-102	1.88e-201	1.76917	1	0.779	4.48e-197	3.36e-120	1.74034	0.993	0.785	8.01e-116	2.56e-125	1.22928	0.99	0.888	6.11e-121	1.14e-103	1.13e-200
Neurons	8	EBF3	3.32e-166	1.4747	0.624	0.122	7.93e-162	2.95e-185	1.48777	0.633	0.114	7.03e-181	1.14e-96	1.03365	0.696	0.215	2.72e-92	5.01e-199	1.26038	0.72	0.167	1.2e-194	1.76e-143	1.16583	0.606	0.106	4.19e-139	1.31e-107	0.865975	0.613	0.182	3.13e-103	1.14e-96	3e-198
Neurons	8	ANK3	2.98e-178	1.95469	0.856	0.291	7.11e-174	4.49e-168	1.62842	0.831	0.268	1.07e-163	2.32e-124	1.37143	0.895	0.385	5.54e-120	1.02e-198	1.50261	0.867	0.353	2.43e-194	1.49e-119	1.36922	0.839	0.318	3.56e-115	1.51e-188	1.43686	0.896	0.322	3.59e-184	1.49e-119	6.12e-198
Neurons	8	KIFAP3	7.08e-94	1.04013	0.693	0.284	1.69e-89	2.01e-126	1.23888	0.747	0.262	4.81e-122	6.43e-84	1.20896	0.891	0.575	1.53e-79	6.83e-198	1.46499	0.922	0.439	1.63e-193	3.51e-107	1.25128	0.885	0.406	8.38e-103	4.57e-98	0.96062	0.873	0.496	1.09e-93	6.43e-84	4.1e-197
Neurons	8	BASP1	6.48e-134	1.50401	0.966	0.724	1.55e-129	1.75e-135	1.51272	0.979	0.744	4.18e-131	7.46e-92	1.16117	0.997	0.924	1.78e-87	8.16e-197	1.55064	1	0.916	1.95e-192	2.1e-128	1.67249	1	0.897	5.01e-124	9.09e-119	1.14778	0.998	0.925	2.17e-114	7.46e-92	4.9e-196
Neurons	8	PRKAR2B	7.06e-125	0.996365	0.629	0.168	1.69e-120	1.54e-110	0.967038	0.589	0.16	3.68e-106	5.04e-104	0.966099	0.78	0.28	1.2e-99	3.28e-193	1.41087	0.851	0.335	7.83e-189	3.51e-128	1.17962	0.817	0.255	8.39e-124	4.81e-151	0.965047	0.747	0.219	1.15e-146	5.04e-104	1.97e-192
Neurons	8	KIDINS220	1.53e-102	1.37908	0.876	0.487	3.64e-98	2.21e-97	1.26428	0.818	0.425	5.28e-93	1.93e-79	1.02692	0.895	0.637	4.61e-75	3.58e-193	1.51023	0.945	0.544	8.54e-189	8.39e-118	1.43586	0.935	0.485	2e-113	1.25e-105	1.13052	0.891	0.56	2.99e-101	1.93e-79	2.15e-192
Neurons	8	NCAM1	6.99e-133	1.43818	0.918	0.435	1.67e-128	1.48e-140	1.51961	0.922	0.41	3.53e-136	1.64e-63	0.854873	0.936	0.59	3.91e-59	1.11e-192	1.57094	0.937	0.426	2.64e-188	1.75e-138	1.57435	0.925	0.349	4.17e-134	7.68e-67	0.696051	0.923	0.545	1.83e-62	1.64e-63	6.65e-192
Neurons	8	MAP1B	1.09e-126	1.50809	0.997	0.852	2.61e-122	3.7e-110	1.36139	0.992	0.846	8.84e-106	7.16e-73	0.930707	0.994	0.948	1.71e-68	4.25e-192	1.60575	0.998	0.911	1.01e-187	3.12e-116	1.555	1	0.938	7.46e-112	5.27e-105	0.967432	1	0.948	1.26e-100	7.16e-73	2.55e-191
Neurons	8	TMSB10	4.9e-95	1.3521	0.972	0.933	1.17e-90	1.28e-91	1.18784	0.974	0.923	3.06e-87	5.49e-84	0.931554	1	0.993	1.31e-79	1.79e-186	1.3482	1	0.988	4.28e-182	2.63e-115	1.32055	1	0.989	6.28e-111	1.1e-96	0.838028	1	0.99	2.63e-92	5.49e-84	1.08e-185
Neurons	8	PKIA	9.3e-148	1.49114	0.907	0.408	2.22e-143	8.86e-126	1.47848	0.852	0.396	2.11e-121	5.62e-114	1.38285	0.927	0.517	1.34e-109	1.76e-183	1.53551	0.924	0.511	4.2e-179	1.91e-126	1.44476	0.921	0.409	4.56e-122	4.52e-151	1.38815	0.916	0.488	1.08e-146	5.62e-114	1.05e-182
Neurons	8	SCG3	1.05e-158	1.22071	0.784	0.199	2.51e-154	1.47e-170	1.20436	0.766	0.174	3.5e-166	7.29e-109	1.21104	0.936	0.385	1.74e-104	6.05e-183	1.24525	0.895	0.307	1.44e-178	1.62e-150	1.45546	0.921	0.281	3.88e-146	1.7e-153	1.21621	0.921	0.342	4.05e-149	7.29e-109	3.63e-182
Neurons	8	MLLT11	2.83e-109	1.27648	0.91	0.583	6.75e-105	3.52e-112	1.23635	0.927	0.572	8.41e-108	1.31e-83	1.18446	0.994	0.894	3.14e-79	4.51e-182	1.54853	0.998	0.694	1.08e-177	3.7e-128	1.74784	0.996	0.612	8.82e-124	1.4e-104	1.12746	0.99	0.893	3.35e-100	1.31e-83	2.71e-181
Neurons	8	TERF2IP	8.78e-84	0.957878	0.925	0.727	2.1e-79	1.25e-92	1.05024	0.927	0.693	2.99e-88	8.39e-103	1.15199	0.987	0.885	2e-98	1.67e-180	1.34119	0.989	0.806	3.98e-176	1.89e-120	1.42576	0.996	0.758	4.52e-116	5.89e-133	1.11446	0.988	0.832	1.41e-128	8.78e-84	1e-179
Neurons	8	NEFM	6.78e-136	1.78087	0.768	0.235	1.62e-131	3.31e-158	1.71186	0.818	0.249	7.89e-154	2.07e-81	1.73785	0.78	0.327	4.95e-77	2.71e-180	1.75708	0.851	0.28	6.46e-176	2.52e-148	2.06691	0.885	0.256	6.02e-144	1.61e-149	2.82182	0.831	0.324	3.83e-145	2.07e-81	1.62e-179
Neurons	8	TUBB2B	1.32e-93	0.966223	0.985	0.921	3.15e-89	1.49e-90	0.973192	0.974	0.915	3.57e-86	7.36e-89	1.03216	1	0.966	1.76e-84	4.57e-179	1.33745	1	0.959	1.09e-174	3.98e-119	1.42715	1	0.975	9.5e-115	3.25e-110	0.958859	1	0.97	7.75e-106	7.36e-89	2.74e-178
Neurons	8	NREP	6.2e-90	1.17388	0.928	0.664	1.48e-85	1.21e-92	1.30678	0.906	0.588	2.88e-88	1.57e-89	1.03365	0.984	0.897	3.74e-85	4.93e-178	1.36211	0.985	0.83	1.18e-173	1.29e-104	1.29746	0.978	0.773	3.09e-100	1.6e-119	1.07901	0.988	0.889	3.81e-115	1.57e-89	2.96e-177
Neurons	8	RBFOX2	6.76e-123	1.38056	0.848	0.399	1.61e-118	4.38e-133	1.3259	0.875	0.385	1.05e-128	2.15e-93	1.11354	0.946	0.652	5.14e-89	6.78e-177	1.33753	0.947	0.538	1.62e-172	1.14e-120	1.39022	0.946	0.476	2.71e-116	3.09e-113	1.1158	0.921	0.607	7.38e-109	2.15e-93	4.07e-176
Neurons	8	GNG3	4.34e-103	0.970361	0.74	0.258	1.04e-98	1.87e-82	0.917582	0.674	0.258	4.47e-78	9.16e-132	1.50893	0.965	0.431	2.19e-127	8.73e-175	1.19455	0.888	0.317	2.08e-170	1.24e-165	1.52937	0.925	0.255	2.96e-161	9.36e-177	1.59558	0.938	0.382	2.23e-172	1.87e-82	5.61e-176
Neurons	8	STMN1	2.58e-75	1.00474	0.954	0.822	6.15e-71	8.41e-80	0.965198	0.979	0.86	2.01e-75	1.21e-81	0.920825	1	0.985	2.88e-77	9.84e-176	1.27944	1	0.977	2.35e-171	5.58e-111	1.32492	1	0.97	1.33e-106	3.88e-76	0.746588	1	0.983	9.27e-72	2.58e-75	5.91e-175
Neurons	8	FNBP1L	6.6e-106	1.29711	0.894	0.54	1.58e-101	3.62e-107	1.2552	0.914	0.563	8.64e-103	5.76e-72	0.924015	0.942	0.805	1.38e-67	4.73e-175	1.39356	0.971	0.718	1.13e-170	6.54e-93	1.2459	0.939	0.618	1.56e-88	1.58e-83	0.896997	0.931	0.735	3.76e-79	5.76e-72	2.84e-174
Neurons	8	MAB21L2	1.77e-153	1.56387	0.562	0.109	4.23e-149	1.77e-75	1.23072	0.607	0.234	4.22e-71	3.82e-91	1.05535	0.543	0.134	9.12e-87	1.47e-22	0.620648	0.495	0.309	3.52e-18	1.23e-56	0.875399	0.502	0.154	2.94e-52	6.3e-174	1.1888	0.486	0.076	1.5e-169	1.47e-22	3.78e-173
Neurons	8	POU2F2	4.5e-156	1.59947	0.755	0.205	1.08e-151	2.3e-172	1.46382	0.771	0.191	5.5e-168	6.71e-100	1.24774	0.767	0.271	1.6e-95	3.55e-146	1.00174	0.64	0.172	8.47e-142	7.71e-66	0.872448	0.588	0.191	1.84e-61	7.04e-118	1.26891	0.801	0.305	1.68e-113	7.71e-66	1.38e-171
Neurons	8	TTC3	1.42e-107	1.14152	0.974	0.814	3.38e-103	1.02e-110	1.2838	0.979	0.748	2.45e-106	5.65e-64	0.716318	0.981	0.927	1.35e-59	2.86e-171	1.2553	0.992	0.887	6.84e-167	7.87e-100	1.25562	0.986	0.869	1.88e-95	1.08e-93	0.838587	0.995	0.918	2.57e-89	5.65e-64	1.72e-170
Neurons	8	CRMP1	1.72e-98	1.28278	0.869	0.517	4.11e-94	3.52e-85	1.08527	0.831	0.47	8.42e-81	6.62e-91	1.14406	0.971	0.66	1.58e-86	6.32e-170	1.24004	0.983	0.677	1.51e-165	1.28e-111	1.3756	0.982	0.622	3.05e-107	5.23e-102	1.03753	0.965	0.678	1.25e-97	3.52e-85	3.79e-169
Neurons	8	SEZ6L2	1.12e-165	1.47933	0.861	0.27	2.67e-161	2.68e-132	1.21732	0.805	0.277	6.4e-128	2.51e-126	1.41523	0.952	0.481	6e-122	2.15e-151	1.11363	0.928	0.474	5.12e-147	5e-95	1.13896	0.91	0.445	1.19e-90	2.04e-167	1.43626	0.975	0.467	4.88e-163	5e-95	1.23e-166
Neurons	8	TMEM35	4.57e-103	0.896734	0.66	0.217	1.09e-98	6.44e-97	0.886866	0.641	0.217	1.54e-92	5.09e-96	0.949615	0.802	0.332	1.22e-91	5.11e-166	1.0451	0.766	0.255	1.22e-161	2.07e-80	0.863377	0.638	0.205	4.95e-76	4.17e-133	1.01081	0.777	0.277	9.95e-129	2.07e-80	3.06e-165
Neurons	8	DPYSL2	1.81e-56	0.785813	0.894	0.777	4.32e-52	2.24e-91	1.08087	0.948	0.724	5.34e-87	4.33e-51	0.691408	0.949	0.88	1.03e-46	1.31e-162	1.27682	0.971	0.797	3.13e-158	4.92e-85	1.1446	0.939	0.69	1.17e-80	1.77e-81	0.76779	0.973	0.892	4.23e-77	4.33e-51	7.88e-162
Neurons	8	RTN4	4.65e-86	1.05294	0.936	0.76	1.11e-81	3.73e-85	1.01421	0.945	0.754	8.91e-81	4.13e-47	0.57536	0.981	0.936	9.87e-43	8.23e-159	1.0963	1	0.908	1.96e-154	1.84e-94	1.14129	0.989	0.898	4.4e-90	5.52e-59	0.577407	0.98	0.927	1.32e-54	4.13e-47	4.94e-158
Neurons	8	VAMP2	2.45e-69	0.940155	0.853	0.629	5.85e-65	1.15e-81	1.05398	0.865	0.565	2.74e-77	2.62e-94	1.05173	0.962	0.886	6.26e-90	2.57e-156	1.15527	0.981	0.803	6.14e-152	1.75e-86	1.0856	0.986	0.847	4.17e-82	8.48e-129	1.18411	0.97	0.859	2.02e-124	2.45e-69	1.54e-155
Neurons	8	ZC2HC1A	8e-85	1.08039	0.753	0.352	1.91e-80	9.82e-68	0.917899	0.661	0.302	2.35e-63	9.85e-85	1.05894	0.911	0.586	2.35e-80	7.62e-155	1.14991	0.924	0.539	1.82e-150	4.99e-95	1.12953	0.918	0.518	1.19e-90	2.8e-80	0.852915	0.868	0.548	6.69e-76	9.82e-68	4.57e-154
Neurons	8	BEX2	2.63e-68	1.00141	0.698	0.351	6.29e-64	2.02e-72	0.961752	0.716	0.346	4.83e-68	4.59e-96	1.21705	0.914	0.601	1.1e-91	7.64e-154	1.28586	0.96	0.661	1.82e-149	2.13e-110	1.43775	0.982	0.755	5.08e-106	3.98e-139	1.2773	0.928	0.551	9.5e-135	2.63e-68	4.59e-153
Neurons	8	CADM2	1.39e-153	1.18249	0.575	0.114	3.31e-149	4.68e-88	1.0233	0.599	0.197	1.12e-83	2.4e-64	0.727044	0.585	0.197	5.73e-60	4.4e-103	0.990201	0.619	0.225	1.05e-98	8.56e-119	1.01526	0.606	0.131	2.04e-114	4.64e-117	0.745762	0.529	0.128	1.11e-112	2.4e-64	8.33e-153
Neurons	8	TUBA1A	7e-85	1.24778	0.977	0.948	1.67e-80	3.3e-99	1.21153	1	0.956	7.87e-95	2.41e-73	0.837101	1	0.997	5.75e-69	6.85e-152	1.15786	1	0.996	1.63e-147	1.41e-99	1.18144	1	0.994	3.36e-95	2.39e-75	0.667978	1	0.997	5.71e-71	2.41e-73	4.11e-151
Neurons	8	GNAO1	1.44e-87	0.916157	0.629	0.217	3.43e-83	4.6e-78	0.909675	0.583	0.207	1.1e-73	1.86e-103	0.949977	0.741	0.255	4.44e-99	2.01e-142	1.01933	0.703	0.248	4.79e-138	3.31e-98	1.03439	0.706	0.232	7.89e-94	1.38e-147	0.981708	0.695	0.202	3.3e-143	4.6e-78	8.3e-147
Neurons	8	TCEAL2	6.48e-74	0.8431	0.657	0.268	1.55e-69	3.54e-74	0.744625	0.594	0.212	8.45e-70	1.31e-76	1.02236	0.773	0.366	3.13e-72	3e-146	1.15415	0.859	0.387	7.17e-142	1.33e-61	0.857842	0.566	0.193	3.18e-57	1.42e-122	1.10547	0.829	0.355	3.4e-118	1.33e-61	1.8e-145
Neurons	8	YWHAH	6.71e-57	0.880544	0.807	0.579	1.6e-52	3.41e-67	0.985178	0.849	0.569	8.13e-63	4.26e-65	0.896781	0.936	0.844	1.02e-60	1.22e-145	1.15832	0.96	0.747	2.92e-141	8.14e-75	1.01137	0.928	0.714	1.94e-70	1.67e-90	0.960812	0.945	0.806	3.98e-86	6.71e-57	7.33e-145
Neurons	8	C4orf48	3.24e-58	1.00044	0.838	0.665	7.73e-54	4.75e-55	0.869479	0.849	0.629	1.13e-50	1.84e-71	0.836052	0.99	0.924	4.38e-67	1.31e-145	1.12434	0.979	0.862	3.12e-141	3.68e-100	1.22327	0.989	0.825	8.79e-96	5.44e-75	0.754932	0.968	0.895	1.3e-70	4.75e-55	7.84e-145
Neurons	8	BEX5	3.81e-78	0.838009	0.58	0.211	9.1e-74	6.35e-83	0.783724	0.505	0.144	1.52e-78	9.41e-64	0.832959	0.54	0.19	2.25e-59	1.08e-144	1.15221	0.697	0.237	2.58e-140	2.03e-90	0.900195	0.591	0.162	4.83e-86	1.61e-113	1.064	0.667	0.236	3.84e-109	9.41e-64	6.5e-144
Neurons	8	LBH	2.01e-92	0.96378	0.649	0.232	4.79e-88	2.16e-85	0.84736	0.651	0.235	5.16e-81	2.28e-79	0.781699	0.77	0.305	5.45e-75	2.5e-144	1.0017	0.804	0.292	5.96e-140	6.76e-133	0.952293	0.731	0.174	1.61e-128	6.08e-128	1.00168	0.772	0.271	1.45e-123	2.28e-79	1.5e-143
Neurons	8	SYT1	9.62e-92	1.00165	0.765	0.312	2.3e-87	8.52e-73	1.02145	0.818	0.436	2.03e-68	6.29e-66	1.02829	0.927	0.62	1.5e-61	1.42e-142	1.28946	0.935	0.516	3.4e-138	3.27e-105	1.6649	0.921	0.452	7.82e-101	4.45e-103	1.19325	0.955	0.667	1.06e-98	6.29e-66	8.55e-142
Neurons	8	KIF3A	1.56e-81	0.956898	0.647	0.269	3.72e-77	3.82e-77	0.889877	0.654	0.276	9.11e-73	7.57e-61	0.81754	0.847	0.574	1.81e-56	2.42e-139	1.02385	0.865	0.44	5.77e-135	1.79e-72	0.934655	0.789	0.387	4.28e-68	3.82e-87	0.913353	0.834	0.507	9.11e-83	7.57e-61	1.45e-138
Neurons	8	CPE	9.89e-69	0.847135	0.794	0.413	2.36e-64	1.73e-70	0.953364	0.812	0.431	4.14e-66	1.45e-84	1.0211	0.933	0.607	3.45e-80	2.91e-138	1.09848	0.933	0.516	6.95e-134	2.86e-102	1.17621	0.971	0.49	6.82e-98	4.18e-138	1.25299	0.928	0.507	9.98e-134	9.89e-69	1.75e-137
Neurons	8	THSD7A	8.26e-86	0.929101	0.495	0.13	1.97e-81	1.39e-129	1.023	0.583	0.128	3.33e-125	3.51e-46	0.602757	0.693	0.308	8.38e-42	1.38e-119	0.944687	0.745	0.279	3.3e-115	1.23e-137	1.23405	0.746	0.174	2.94e-133	8.34e-60	0.712998	0.67	0.302	1.99e-55	3.51e-46	7.38e-137
Neurons	8	PAFAH1B3	1.08e-76	0.945323	0.804	0.487	2.59e-72	1.04e-56	0.820855	0.758	0.464	2.49e-52	7.31e-79	0.943538	0.965	0.818	1.75e-74	1.67e-137	1.06	0.977	0.795	3.98e-133	8.82e-90	1.15282	0.964	0.74	2.1e-85	1.25e-92	0.920087	0.948	0.753	2.99e-88	1.04e-56	1e-136
Neurons	8	PCDH9	8.81e-73	1.12125	0.526	0.179	2.1e-68	3.05e-52	0.755335	0.448	0.162	7.28e-48	4.39e-55	0.733226	0.46	0.147	1.05e-50	1.2e-119	1.02661	0.549	0.158	2.87e-115	6.64e-111	0.975241	0.556	0.118	1.58e-106	7.4e-137	0.912252	0.514	0.108	1.77e-132	3.05e-52	4.44e-136
Neurons	8	CEP170	1.77e-100	1.22925	0.869	0.487	4.23e-96	1e-89	1.00468	0.867	0.488	2.39e-85	9.25e-57	0.813077	0.898	0.671	2.21e-52	1.46e-132	1.16996	0.901	0.593	3.48e-128	7.85e-84	1.16193	0.882	0.504	1.87e-79	2.7e-69	0.744396	0.883	0.641	6.45e-65	9.25e-57	8.75e-132
Neurons	8	KLC1	1.86e-105	1.1026	0.843	0.412	4.45e-101	7.13e-105	1.0769	0.844	0.392	1.7e-100	3.4e-51	0.74277	0.837	0.623	8.11e-47	3.86e-130	1.01341	0.884	0.491	9.21e-126	1.06e-97	1.17964	0.871	0.427	2.53e-93	2.18e-78	0.764765	0.888	0.607	5.2e-74	3.4e-51	2.32e-129
Neurons	8	APC	1.25e-76	1.00241	0.696	0.329	2.99e-72	4.36e-83	1.05136	0.703	0.308	1.04e-78	4.77e-63	0.85651	0.847	0.53	1.14e-58	2.61e-129	1.07463	0.859	0.482	6.24e-125	1.02e-69	0.946361	0.814	0.441	2.43e-65	2.68e-74	0.842415	0.779	0.443	6.39e-70	4.77e-63	1.57e-128
Neurons	8	GDAP1L1	7.18e-99	0.983181	0.794	0.327	1.71e-94	8.37e-86	0.881964	0.753	0.312	2e-81	3.95e-78	0.85604	0.863	0.407	9.43e-74	1.93e-117	0.911885	0.825	0.384	4.61e-113	7.21e-89	1.02451	0.878	0.405	1.72e-84	3.69e-127	0.981765	0.873	0.358	8.8e-123	3.95e-78	2.21e-126
Neurons	8	MAP1LC3A	2.61e-67	0.749006	0.526	0.186	6.23e-63	1.88e-55	0.701704	0.516	0.202	4.5e-51	2.81e-44	0.904837	0.818	0.607	6.72e-40	4.32e-127	1.12027	0.789	0.337	1.03e-122	4.83e-95	1.0852	0.792	0.284	1.15e-90	2.67e-78	1.03439	0.824	0.534	6.38e-74	2.81e-44	2.59e-126
Neurons	8	ANKRD12	8.75e-67	1.08651	0.83	0.535	2.09e-62	1.46e-82	1.15388	0.857	0.539	3.47e-78	1.06e-59	0.872404	0.907	0.762	2.52e-55	6.86e-127	1.08155	0.931	0.646	1.64e-122	2.02e-68	1.031	0.925	0.624	4.81e-64	5e-81	0.914733	0.913	0.701	1.19e-76	1.06e-59	4.12e-126
Neurons	8	AKAP9	3.34e-73	1.04798	0.876	0.627	7.98e-69	2.76e-71	1.06879	0.917	0.622	6.59e-67	2.44e-56	0.818436	0.923	0.802	5.83e-52	1.14e-121	1.11417	0.931	0.711	2.71e-117	1.55e-56	0.910588	0.907	0.697	3.71e-52	7.88e-86	0.927322	0.94	0.774	1.88e-81	2.44e-56	6.81e-121
Neurons	8	CAMK2N1	9.12e-84	1.09436	0.858	0.492	2.18e-79	1.1e-66	0.863557	0.776	0.395	2.63e-62	1.01e-76	1.09946	0.904	0.592	2.42e-72	3.49e-76	0.861801	0.815	0.494	8.32e-72	6.2e-73	1.01637	0.86	0.465	1.48e-68	2.12e-119	1.26212	0.928	0.57	5.06e-115	1.1e-66	1.27e-118
Neurons	8	MAP2	3.78e-104	1.28076	0.966	0.675	9.02e-100	2.14e-87	1.13264	0.943	0.679	5.11e-83	7.35e-73	0.93714	0.978	0.82	1.76e-68	6.28e-113	1.04763	0.96	0.76	1.5e-108	5.25e-86	1.29872	0.943	0.68	1.25e-81	1.38e-111	1.11969	0.985	0.733	3.29e-107	7.35e-73	3.77e-112
Neurons	8	ENO2	2.17e-59	0.905542	0.812	0.538	5.19e-55	1.06e-65	0.858544	0.833	0.515	2.54e-61	1.29e-72	1.1039	0.901	0.631	3.09e-68	9.27e-112	0.954474	0.851	0.465	2.21e-107	3.71e-71	0.978033	0.842	0.445	8.85e-67	3.08e-110	1.26346	0.94	0.649	7.36e-106	2.17e-59	5.56e-111
Neurons	8	SOX4	3.48e-88	1.06541	0.99	0.877	8.31e-84	1.35e-108	1.32794	0.987	0.868	3.23e-104	4.88e-42	0.733188	0.99	0.953	1.17e-37	3.18e-84	1.04531	0.983	0.919	7.58e-80	6.58e-89	1.4002	1	0.883	1.57e-84	2.08e-44	0.582046	0.99	0.948	4.96e-40	4.88e-42	8.13e-108
Neurons	8	SNCG	1.36e-32	0.819454	0.539	0.293	3.24e-28	7.47e-16	0.436764	0.424	0.253	1.78e-11	2e-55	1.00539	0.585	0.239	4.77e-51	5.48e-93	1.2862	0.672	0.287	1.31e-88	1.35e-28	0.895439	0.76	0.52	3.22e-24	3.84e-87	1.08014	0.658	0.247	9.17e-83	7.47e-16	3.29e-92
Neurons	8	NOVA1	7.64e-65	1.40849	0.874	0.62	1.82e-60	1.83e-82	1.29816	0.87	0.519	4.36e-78	1.01e-25	0.62797	0.927	0.857	2.42e-21	1.91e-75	0.873568	0.863	0.596	4.55e-71	1.01e-77	1.24107	0.918	0.588	2.42e-73	1.3e-17	0.338815	0.94	0.827	3.09e-13	1.3e-17	1.1e-81
Neurons	8	ZFHX3	1.85e-82	1.36369	0.822	0.472	4.42e-78	3.41e-51	0.865742	0.773	0.467	8.14e-47	1.03e-62	1.05696	0.879	0.62	2.45e-58	3.48e-47	0.779201	0.764	0.571	8.3e-43	2.97e-34	0.786839	0.753	0.5	7.1e-30	1.86e-62	1.11445	0.839	0.58	4.43e-58	2.97e-34	1.11e-81
Neurons	8	LMO3	3.55e-15	1.21019	0.412	0.282	8.48e-11	1.96e-52	1.5392	0.5	0.227	4.69e-48	2.43e-28	1.35354	0.364	0.166	5.81e-24	6.31e-57	1.50404	0.583	0.338	1.51e-52	3.78e-25	1.05431	0.48	0.265	9.03e-21	2.46e-32	0.924935	0.27	0.099	5.88e-28	3.55e-15	3.78e-56
Radial Glia	9	MALAT1	1.96e-29	0.734173	1	1	4.67e-25	8.15e-43	0.712019	1	1	1.95e-38	4.15e-17	1.73211	0.982	0.99	9.9e-13	6.46e-16	1.33351	0.967	0.988	1.54e-11	6.3e-29	1.4767	0.976	0.994	1.5e-24	4.07e-17	1.44409	0.975	0.994	9.71e-13	6.46e-16	4.89e-42
Radial Glia	9	7SK,2	6.99e-29	0.891894	0.888	0.913	1.67e-24	1.36e-40	0.889481	0.932	0.942	3.24e-36	0.647773	1.66982	0.494	0.781	1	3.27e-19	2.35037	0.828	0.92	7.82e-15	1.85e-19	2.43263	0.732	0.825	4.41e-15	0.0104173	2.84162	0.354	0.582	1	0.647773	8.15e-40
Radial Glia	9	NEAT1	5.04e-22	1.3451	0.695	0.672	1.2e-17	4.64e-25	1.27264	0.695	0.686	1.11e-20	0.78279	1.26161	0.433	0.608	1	6.21e-08	1.73137	0.544	0.562	0.00148209	1.98e-11	1.59847	0.691	0.744	4.73e-07	0.995052	1.16368	0.448	0.636	1	0.995052	2.78e-24
Radial Glia	9	VEZT	0.0140984	0.35951	0.358	0.504	1	9.18e-05	0.284058	0.312	0.471	1	8.79e-10	0.407479	0.25	0.611	2.1e-05	0.00808492	0.364583	0.27	0.435	1	0.00174353	0.326587	0.256	0.413	1	4.78e-18	0.376871	0.235	0.561	1.14e-13	0.0140984	2.87e-17
Radial Glia	9	UPF2	0.000972355	0.372161	0.328	0.486	1	0.000108343	0.312316	0.31	0.456	1	1.58e-07	0.306294	0.256	0.578	0.00377028	2.73e-06	0.404914	0.247	0.507	0.0652673	0.00573505	0.399464	0.28	0.433	1	2.67e-17	0.365835	0.235	0.555	6.38e-13	0.00573505	1.6e-16
Radial Glia	9	PIK3R3	0.000640673	0.262446	0.323	0.465	1	1.19e-05	0.331133	0.324	0.488	0.284888	6.66e-07	0.449044	0.305	0.616	0.0159003	0.636918	0.966989	0.447	0.576	1	0.00576168	0.384451	0.325	0.518	1	8.51e-17	0.428536	0.225	0.536	2.03e-12	0.636918	5.1e-16
Radial Glia	9	MSI2	3.89e-05	0.313806	0.442	0.644	0.927632	0.966891	0.492151	0.509	0.639	1	2.7e-07	0.265402	0.317	0.639	0.00645001	3.51e-05	0.267211	0.353	0.615	0.837299	0.00176869	0.362243	0.333	0.551	1	3.07e-16	0.361347	0.262	0.576	7.34e-12	0.966891	1.84e-15
Radial Glia	9	KIF1B	3.74e-07	0.434491	0.437	0.651	0.00891971	9.68e-12	0.667378	0.383	0.607	2.31e-07	3.62e-06	0.592029	0.341	0.685	0.0865052	0.0098333	0.606393	0.395	0.641	1	0.241776	0.547416	0.411	0.593	1	8.45e-16	0.398903	0.287	0.629	2.02e-11	0.241776	5.07e-15
Radial Glia	9	ARHGAP21	4.95e-05	0.321558	0.394	0.589	1	0.224164	0.440899	0.444	0.589	1	0.00516412	0.564498	0.341	0.595	1	8.08e-05	0.295092	0.367	0.633	1	0.184242	0.586771	0.386	0.569	1	1.82e-15	0.461756	0.248	0.554	4.34e-11	0.224164	1.09e-14
Radial Glia	9	BDP1	0.00157595	0.482695	0.383	0.551	1	1.96e-05	0.302839	0.343	0.518	0.46757	9.86e-08	0.394731	0.256	0.581	0.00235466	0.00131016	0.444975	0.349	0.593	1	0.116699	0.535714	0.382	0.573	1	2.37e-15	0.455212	0.248	0.554	5.65e-11	0.116699	1.42e-14
Radial Glia	9	BAZ2B	2.04e-10	0.328309	0.295	0.517	4.88e-06	3.03e-05	0.306986	0.304	0.457	0.72452	1.93e-06	0.327909	0.329	0.678	0.0460324	0.661329	0.741115	0.428	0.597	1	0.03518	0.49353	0.358	0.543	1	4.5e-15	0.426824	0.309	0.648	1.07e-10	0.661329	2.7e-14
Radial Glia	9	WDR74	4.57e-05	0.351656	0.308	0.467	1	2.5e-07	0.418233	0.246	0.408	0.00597945	4.74e-06	0.522891	0.25	0.525	0.113204	9.3e-05	0.418317	0.228	0.416	1	0.00258847	0.561333	0.244	0.399	1	4.55e-14	0.300887	0.22	0.501	1.09e-09	0.00258847	2.73e-13
Radial Glia	9	KMT2E	0.975364	0.384831	0.613	0.785	1	0.131161	0.455803	0.62	0.774	1	0.000468249	0.297104	0.47	0.861	1	0.105339	0.552624	0.493	0.77	1	0.317101	0.379379	0.52	0.768	1	4.74e-14	0.332407	0.408	0.829	1.13e-09	0.975364	2.84e-13
Radial Glia	9	MTRNR2L12	5.54e-05	1.13054	0.684	0.79	1	2e-13	1.30143	0.734	0.815	4.77e-09	0.800326	1.12412	0.573	0.9	1	3.98e-07	1.40102	0.73	0.879	0.00949639	7.89e-07	1.05661	0.72	0.873	0.0188263	5.52e-09	0.65539	0.364	0.707	0.000131689	0.800326	1.2e-12
Radial Glia	9	SPTAN1	0.00519606	0.311558	0.36	0.504	1	8.37e-05	0.308137	0.295	0.432	1	2.28e-07	0.483108	0.287	0.616	0.00544969	0.0101972	0.572828	0.335	0.528	1	0.0322781	0.481189	0.28	0.418	1	2.87e-13	0.419515	0.25	0.523	6.85e-09	0.0322781	1.72e-12
Radial Glia	9	SPAG9	0.751742	0.384671	0.561	0.71	1	0.004963	0.254374	0.524	0.721	1	0.000927985	0.46944	0.427	0.751	1	0.00745098	0.347333	0.456	0.755	1	0.672723	0.563929	0.5	0.682	1	3e-13	0.357387	0.354	0.705	7.16e-09	0.751742	1.8e-12
Radial Glia	9	MGEA5	0.736517	0.534435	0.483	0.602	1	0.957283	0.402054	0.476	0.602	1	0.000249913	0.534413	0.335	0.634	1	0.000922907	0.372631	0.307	0.53	1	0.0108142	0.43347	0.317	0.514	1	3.41e-13	0.383937	0.277	0.588	8.15e-09	0.957283	2.05e-12
Radial Glia	9	ARGLU1	0.780935	0.422514	0.541	0.699	1	0.642708	0.512695	0.5	0.663	1	0.243443	0.770379	0.512	0.839	1	0.0208435	0.737326	0.623	0.837	1	0.537466	0.666271	0.569	0.816	1	4.04e-13	0.408403	0.384	0.788	9.65e-09	0.780935	2.42e-12
Radial Glia	9	EPM2AIP1	0.079089	0.323671	0.29	0.377	1	0.00973009	0.383127	0.266	0.372	1	3.77e-08	0.343797	0.226	0.519	0.000900713	0.00103757	0.441801	0.247	0.419	1	0.00700731	0.382392	0.236	0.378	1	5.38e-13	0.320167	0.188	0.43	1.28e-08	0.079089	3.23e-12
Radial Glia	9	VANGL2	0.000570022	0.259918	0.237	0.348	1	8.93e-05	0.273124	0.184	0.289	1	0.000641888	0.601516	0.226	0.423	1	3.22e-05	0.414615	0.172	0.347	0.769453	0.00588707	0.307459	0.215	0.339	1	1.02e-12	0.413826	0.149	0.359	2.44e-08	0.00588707	6.13e-12
Radial Glia	9	CHD7	0.0984899	0.346903	0.536	0.706	1	0.000871588	0.303889	0.465	0.651	1	0.00139873	0.472204	0.402	0.713	1	0.0376386	0.61341	0.414	0.681	1	0.0142013	0.492047	0.439	0.666	1	1.21e-12	0.378333	0.379	0.745	2.9e-08	0.0984899	7.28e-12
Radial Glia	9	PRRT2	0.0126978	0.40198	0.25	0.349	1	2.28e-07	0.34596	0.187	0.323	0.00543696	0.776241	1.12945	0.39	0.506	1	0.0033397	0.399154	0.186	0.31	1	0.00894	0.258495	0.195	0.295	1	1.57e-12	0.393218	0.203	0.457	3.76e-08	0.776241	9.44e-12
Radial Glia	9	POGZ	0.000595549	0.356317	0.27	0.398	1	0.000451765	0.381691	0.246	0.362	1	4.84e-10	0.325281	0.238	0.576	1.15e-05	0.00386332	0.260936	0.223	0.37	1	0.0454117	0.492587	0.236	0.352	1	2.04e-12	0.437562	0.238	0.51	4.87e-08	0.0454117	1.22e-11
Radial Glia	9	PRPF4B	0.783543	0.450806	0.545	0.685	1	0.817726	0.544857	0.514	0.665	1	5.48e-07	0.473998	0.378	0.758	0.013087	0.0120256	0.475514	0.433	0.7	1	0.271776	0.727895	0.435	0.66	1	2.37e-12	0.516672	0.379	0.746	5.65e-08	0.817726	1.42e-11
Radial Glia	9	ZNF532	3.14e-06	0.257046	0.239	0.39	0.0749907	0.000286671	0.291641	0.263	0.386	1	2.71e-05	0.525375	0.22	0.453	0.647548	0.000827836	0.290789	0.191	0.337	1	0.0319376	0.454162	0.232	0.334	1	3.08e-12	0.342416	0.181	0.415	7.36e-08	0.0319376	1.85e-11
Radial Glia	9	GOLGA4	2.06e-06	0.305567	0.372	0.586	0.0490768	0.000916009	0.342041	0.43	0.606	1	5.59e-08	0.284473	0.28	0.62	0.00133349	0.0138219	0.336943	0.353	0.552	1	0.0196988	0.790879	0.463	0.551	1	3.75e-12	0.369232	0.28	0.582	8.95e-08	0.0196988	2.25e-11
Radial Glia	9	ZNF207	0.55038	0.351657	0.462	0.594	1	0.0971166	0.391554	0.418	0.566	1	2e-05	0.327746	0.39	0.734	0.477952	0.00458291	0.45699	0.353	0.594	1	0.215302	0.522877	0.394	0.576	1	4.29e-12	0.476938	0.332	0.673	1.03e-07	0.55038	2.58e-11
Radial Glia	9	KAT6A	0.0166333	0.35563	0.345	0.489	1	0.000663465	0.411997	0.319	0.466	1	1.09e-07	0.290594	0.183	0.449	0.00260772	0.0067414	0.415477	0.27	0.426	1	0.0303143	0.349256	0.268	0.401	1	4.8e-12	0.292527	0.173	0.396	1.15e-07	0.0303143	2.88e-11
Radial Glia	9	CHD2	0.00312977	0.285655	0.431	0.604	1	0.221658	0.474554	0.459	0.607	1	8.02e-06	0.341539	0.323	0.628	0.191432	0.643593	0.63495	0.419	0.59	1	0.00392085	0.305233	0.337	0.549	1	5.04e-12	0.432848	0.285	0.576	1.2e-07	0.643593	3.03e-11
Radial Glia	9	PAXBP1	0.353942	0.451551	0.354	0.462	1	0.0158178	0.440396	0.319	0.444	1	2.18e-07	0.314225	0.183	0.441	0.00520505	0.582198	0.853063	0.34	0.466	1	0.89669	0.556152	0.333	0.421	1	6.16e-12	0.41227	0.168	0.388	1.47e-07	0.89669	3.69e-11
Radial Glia	9	LUC7L3	0.0541086	0.333027	0.585	0.759	1	0.288901	0.439287	0.579	0.76	1	0.383503	0.708514	0.537	0.843	1	0.717102	0.670052	0.586	0.835	1	0.0767762	0.659335	0.598	0.799	1	1.31e-11	0.360214	0.421	0.827	3.14e-07	0.717102	7.88e-11
Radial Glia	9	GOLGB1	9.85e-07	0.273584	0.339	0.533	0.0235147	0.00169838	0.537639	0.359	0.509	1	0.00873622	0.654058	0.39	0.696	1	0.56932	0.661476	0.433	0.625	1	0.158812	0.772689	0.484	0.621	1	2.18e-11	0.370322	0.337	0.666	5.21e-07	0.56932	1.31e-10
Radial Glia	9	PKN2	0.123988	0.393443	0.374	0.5	1	0.00453193	0.334028	0.35	0.505	1	1.58e-06	0.542388	0.262	0.544	0.0376806	0.011632	0.685677	0.312	0.504	1	0.110981	0.532047	0.337	0.483	1	6.28e-11	0.411701	0.245	0.504	1.5e-06	0.123988	3.77e-10
Radial Glia	9	PIK3C2A	0.0112201	0.36508	0.321	0.453	1	0.83094	0.547279	0.36	0.447	1	0.000327128	0.374632	0.189	0.368	1	0.0322942	0.449685	0.242	0.356	1	0.969028	0.559892	0.268	0.317	1	6.83e-11	0.301943	0.139	0.326	1.63e-06	0.969028	4.1e-10
Radial Glia	9	SLC38A2	0.540206	0.46996	0.36	0.443	1	0.250466	0.568483	0.336	0.424	1	2.52e-08	0.273733	0.25	0.562	0.00060164	0.447168	0.961366	0.437	0.567	1	0.0199255	0.606726	0.329	0.512	1	1.19e-10	0.449214	0.243	0.494	2.83e-06	0.540206	7.11e-10
Radial Glia	9	MDM4	0.208871	0.421579	0.389	0.514	1	0.0016407	0.361987	0.325	0.469	1	0.00399059	0.558091	0.268	0.471	1	0.179543	0.451383	0.274	0.382	1	0.0770573	0.350166	0.252	0.36	1	1.93e-10	0.457843	0.196	0.42	4.62e-06	0.208871	1.16e-09
Radial Glia	9	NUFIP2	0.635343	0.377658	0.495	0.651	1	0.732497	0.516043	0.52	0.663	1	2.87e-10	0.258329	0.195	0.517	6.84e-06	0.844263	0.890405	0.437	0.607	1	0.308535	0.621579	0.386	0.551	1	3.22e-08	0.582117	0.233	0.456	0.000769625	0.844263	1.72e-09
Radial Glia	9	MTRNR2L8	0.144093	0.679791	0.257	0.336	1	0.0473069	1.01031	0.413	0.46	1	2.24e-06	0.269598	0.195	0.433	0.0535912	2.83e-06	1.41669	0.744	0.918	0.0675263	2.24e-07	1.08186	0.744	0.924	0.00534012	2.99e-10	0.431968	0.101	0.263	7.14e-06	0.144093	1.8e-09
Radial Glia	9	SETD5	0.160905	0.43444	0.406	0.537	1	0.00773012	0.381602	0.372	0.533	1	6.63e-05	0.450506	0.268	0.522	1	0.00104858	0.360261	0.256	0.455	1	0.0867837	0.403271	0.313	0.445	1	3.67e-10	0.470241	0.243	0.483	8.75e-06	0.160905	2.2e-09
Radial Glia	9	INTU	0.000926422	0.329265	0.301	0.442	1	0.000288715	0.306785	0.281	0.412	1	0.00390004	0.696482	0.25	0.442	1	0.0011636	0.399161	0.228	0.394	1	0.240431	0.82681	0.346	0.391	1	4.62e-10	0.354235	0.186	0.392	1.1e-05	0.240431	2.77e-09
Radial Glia	9	CDK12	0.0529677	0.320222	0.319	0.426	1	0.0736786	0.50387	0.28	0.384	1	0.000234309	0.469174	0.238	0.444	1	0.669522	0.772945	0.312	0.406	1	0.345037	0.58661	0.305	0.409	1	4.66e-10	0.405092	0.163	0.361	1.11e-05	0.669522	2.8e-09
Radial Glia	9	ASCC3	0.26263	0.517292	0.363	0.46	1	0.0611559	0.393691	0.318	0.424	1	7.73e-05	0.365662	0.159	0.339	1	0.121633	0.643563	0.274	0.404	1	0.971948	0.636233	0.346	0.449	1	9.98e-10	0.423005	0.139	0.314	2.38e-05	0.971948	5.99e-09
Radial Glia	9	MACF1	7.21e-05	0.299281	0.268	0.415	1	7.96e-05	0.282788	0.245	0.37	1	1.32e-05	0.605508	0.293	0.578	0.314622	0.446974	0.815402	0.372	0.515	1	0.803732	0.581772	0.341	0.45	1	2.17e-09	0.596031	0.262	0.531	5.18e-05	0.803732	1.3e-08
Radial Glia	9	KMT2A	0.154471	0.426198	0.505	0.68	1	0.279943	0.4359	0.495	0.652	1	3.5e-09	0.293442	0.341	0.72	8.36e-05	0.296532	0.85595	0.47	0.633	1	0.559046	0.747062	0.447	0.611	1	2.38e-08	0.63326	0.361	0.684	0.000567392	0.559046	2.1e-08
Radial Glia	9	RN7SL1	4.02e-09	1.01746	0.646	0.69	9.59e-05	0.00102946	0.741459	0.606	0.698	1	0.0369058	0.655261	0.189	0.301	1	0.229989	2.27897	0.395	0.566	1	0.973302	1.18977	0.268	0.327	1	0.000110995	0.439011	0.126	0.231	1	0.973302	2.41e-08
Radial Glia	9	SPEN	0.0170887	0.431613	0.352	0.497	1	0.0938722	0.445904	0.372	0.49	1	1.94e-07	0.350094	0.226	0.499	0.00462734	0.880936	0.868425	0.321	0.407	1	0.884362	0.572683	0.313	0.397	1	4.53e-09	0.36097	0.218	0.44	0.000108055	0.884362	2.72e-08
Radial Glia	9	KIAA1109	0.00620419	0.282285	0.261	0.371	1	0.000206688	0.274892	0.223	0.337	1	0.00504958	0.274072	0.22	0.379	1	0.00158533	0.258089	0.209	0.356	1	0.512575	0.663087	0.264	0.297	1	4.89e-09	0.442455	0.171	0.362	0.000116836	0.512575	2.94e-08
Radial Glia	9	LRP6	0.0761657	0.276123	0.305	0.411	1	0.0047737	0.314419	0.278	0.393	1	0.00323577	0.514195	0.207	0.37	1	0.112472	0.462147	0.247	0.354	1	0.00838968	0.309565	0.207	0.326	1	1.27e-08	0.307604	0.141	0.303	0.000302977	0.112472	7.61e-08
Radial Glia	9	ASH1L	0.00526495	0.348866	0.363	0.513	1	0.0406469	0.479004	0.337	0.461	1	3.37e-05	0.419431	0.244	0.486	0.804719	0.940376	0.679821	0.321	0.409	1	0.66618	0.627756	0.293	0.379	1	1.79e-08	0.454559	0.225	0.44	0.000426802	0.940376	1.07e-07
Radial Glia	9	METTL12	0.00506453	0.97874	0.404	0.436	1	0.00621452	0.915533	0.386	0.418	1	0.00112389	0.353373	0.152	0.304	1	2.31e-08	1.65719	0.349	0.248	0.00055048	0.0832862	1.10095	0.252	0.247	1	0.0131949	0.955266	0.218	0.33	1	0.0832862	1.38e-07
Radial Glia	9	KCNQ1OT1	0.674808	0.480612	0.622	0.736	1	0.346891	0.370879	0.616	0.738	1	0.974837	0.9909	0.524	0.794	1	3.65e-08	1.38243	0.656	0.743	0.000870986	2.27e-06	1.08399	0.618	0.701	0.0542466	0.277193	1.0645	0.532	0.755	1	0.974837	2.19e-07
Radial Glia	9	KMT2C	0.00231972	0.401344	0.316	0.462	1	0.634864	0.599935	0.353	0.439	1	6.07e-08	0.299944	0.177	0.446	0.00144904	0.576297	0.654313	0.349	0.42	1	0.754288	0.616328	0.317	0.386	1	7.79e-07	0.445645	0.205	0.384	0.0185923	0.754288	3.64e-07
Radial Glia	9	C1orf63	0.00622071	0.491311	0.266	0.384	1	0.00498176	0.40255	0.237	0.337	1	0.00264559	0.567307	0.25	0.437	1	7.32e-06	1.1455	0.423	0.377	0.174828	0.0192835	0.926418	0.346	0.347	1	6.31e-08	0.465542	0.213	0.419	0.00150547	0.0192835	3.78e-07
Radial Glia	9	SMG1	0.156889	0.526343	0.316	0.409	1	0.475212	0.679187	0.356	0.422	1	0.00700247	0.341198	0.195	0.33	1	0.0270013	0.537761	0.237	0.366	1	0.165557	0.463981	0.24	0.329	1	8.29e-08	0.326487	0.136	0.286	0.00197944	0.475212	4.97e-07
Radial Glia	9	WSB1	0.000306198	0.584507	0.749	0.846	1	2.17e-05	0.678058	0.707	0.82	0.518117	0.0146139	1.17354	0.64	0.897	1	0.0209217	0.959216	0.586	0.819	1	1.07e-07	1.22536	0.667	0.846	0.00255478	0.0262189	0.836222	0.522	0.875	1	0.0262189	6.42e-07
Radial Glia	9	ZFC3H1	0.694755	0.529555	0.288	0.35	1	0.167634	0.459154	0.229	0.292	1	0.00823102	0.318704	0.146	0.265	1	0.135768	0.573765	0.191	0.269	1	0.449247	0.610379	0.203	0.256	1	1.07e-07	0.276798	0.109	0.244	0.00256296	0.694755	6.44e-07
Radial Glia	9	DST	1.06e-05	0.276665	0.354	0.525	0.253327	0.00109924	0.559843	0.354	0.505	1	0.0426474	0.583286	0.439	0.72	1	0.0219486	0.513394	0.349	0.54	1	0.415456	0.685513	0.366	0.495	1	1.75e-07	0.643472	0.379	0.685	0.00418005	0.415456	1.05e-06
Radial Glia	9	TET2	0.00123711	0.312388	0.244	0.361	1	0.00602546	0.251287	0.222	0.305	1	0.000486239	0.304911	0.165	0.318	1	0.0139142	0.252136	0.2	0.315	1	0.106673	0.290182	0.191	0.262	1	2.89e-07	0.392407	0.131	0.27	0.00688806	0.106673	1.73e-06
Radial Glia	9	FRYL	0.0119228	0.452156	0.257	0.358	1	0.222863	0.514221	0.289	0.374	1	3.67e-07	0.52034	0.159	0.404	0.00876698	0.00138259	0.362166	0.228	0.385	1	0.0235807	0.406862	0.224	0.344	1	7.05e-06	0.478825	0.181	0.328	0.168312	0.222863	2.2e-06
Radial Glia	9	BIRC6	0.000206659	0.340933	0.259	0.395	1	0.0215378	0.522835	0.249	0.346	1	5.68e-05	0.351053	0.159	0.35	1	0.0272548	0.452643	0.233	0.357	1	0.752953	0.565394	0.268	0.332	1	4.88e-07	0.435052	0.151	0.304	0.0116532	0.752953	2.93e-06
Radial Glia	9	VPS53	0.0276335	0.367796	0.18	0.245	1	0.0266393	0.315515	0.16	0.22	1	0.00466022	0.414915	0.152	0.274	1	0.349645	0.295948	0.177	0.224	1	0.880054	0.48582	0.183	0.211	1	5.76e-07	0.258901	0.116	0.248	0.0137491	0.880054	3.46e-06
Radial Glia	9	PNISR	0.00272623	0.420794	0.701	0.824	1	0.678399	0.434054	0.65	0.812	1	0.305263	0.504458	0.53	0.906	1	0.621383	0.323175	0.595	0.881	1	0.0192593	0.57512	0.65	0.872	1	8.33e-07	0.344035	0.493	0.885	0.0198795	0.678399	5e-06
Radial Glia	9	ZCCHC11	0.425651	0.341459	0.657	0.805	1	0.00157049	0.537597	0.675	0.802	1	0.0636364	0.91412	0.463	0.778	1	0.0964561	0.847266	0.535	0.723	1	0.409122	0.809982	0.492	0.702	1	1.89e-06	0.638698	0.406	0.729	0.0450578	0.425651	1.13e-05
Radial Glia	9	PTPN13	4.96e-06	0.344594	0.163	0.282	0.118442	0.00256655	0.389553	0.169	0.248	1	0.0147052	0.397826	0.165	0.28	1	0.0434392	0.278238	0.191	0.294	1	0.348934	0.412401	0.264	0.343	1	3.32e-05	0.319173	0.136	0.252	0.792882	0.348934	2.98e-05
Radial Glia	9	ZMAT3	0.324054	0.447907	0.31	0.385	1	0.147378	0.604557	0.381	0.427	1	0.150226	0.317933	0.14	0.196	1	0.0601464	0.40293	0.14	0.216	1	0.19989	0.297364	0.203	0.265	1	9.22e-06	0.290236	0.089	0.188	0.220125	0.324054	5.53e-05
Radial Glia	9	RBM33	0.111086	0.45574	0.378	0.514	1	0.0603494	0.333244	0.375	0.515	1	0.000307645	0.355735	0.189	0.37	1	0.137171	0.478934	0.26	0.383	1	0.229795	0.337516	0.236	0.318	1	2.48e-05	0.523443	0.181	0.323	0.593035	0.229795	0.000149038
Radial Glia	9	REV3L	3.81e-05	0.311453	0.211	0.333	0.909384	0.0924378	0.352217	0.249	0.324	1	0.00752517	0.338963	0.146	0.259	1	0.447339	0.445106	0.237	0.306	1	0.379423	0.384682	0.22	0.283	1	4.22e-05	0.264667	0.114	0.217	1	0.447339	0.000228534
Radial Glia	9	VPS13C	0.0303361	0.438849	0.242	0.334	1	0.0503793	0.500815	0.226	0.305	1	0.455526	0.762314	0.25	0.332	1	0.149154	0.532999	0.223	0.312	1	0.572328	0.632398	0.236	0.299	1	0.000242883	0.601263	0.186	0.311	1	0.572328	0.00145642
Radial Glia	9	NKTR	0.243786	0.455325	0.539	0.673	1	0.0660096	0.653365	0.556	0.679	1	0.00943201	0.626965	0.433	0.763	1	0.60228	0.715352	0.456	0.654	1	0.0447921	0.764514	0.504	0.648	1	0.000481872	0.785378	0.421	0.717	1	0.60228	0.00288775
Radial Glia	9	RERE	0.0630496	0.308156	0.523	0.691	1	0.000764387	0.319972	0.454	0.649	1	0.945616	0.890376	0.53	0.799	1	0.378241	0.706706	0.456	0.667	1	0.0832177	0.563287	0.39	0.596	1	0.0940555	1.1241	0.569	0.822	1	0.945616	0.00457756
Radial Glia	9	DIP2A	0.0497058	0.448678	0.246	0.335	1	0.00489503	0.511497	0.229	0.336	1	0.023415	0.357851	0.152	0.251	1	0.403592	0.480664	0.181	0.23	1	0.191057	0.402487	0.146	0.198	1	0.00138324	0.514403	0.139	0.232	1	0.403592	0.00827081
Radial Glia	9	TLE4	0.0735347	0.630991	0.394	0.528	1	0.00454034	0.756606	0.359	0.506	1	0.0270782	0.414103	0.476	0.768	1	0.230314	0.719234	0.521	0.749	1	0.0477431	0.636931	0.463	0.725	1	0.00217438	0.726	0.493	0.829	1	0.230314	0.0129756
Radial Glia	9	PCLO	0.0029795	0.369733	0.361	0.501	1	0.0117461	0.633488	0.464	0.497	1	0.0975712	0.579208	0.177	0.261	1	0.359181	0.577505	0.27	0.358	1	0.005483	1.14166	0.472	0.552	1	0.0429463	0.780476	0.203	0.293	1	0.359181	0.0177443
Radial Glia	9	MIAT	0.00670485	0.900361	0.514	0.576	1	0.283079	0.865316	0.432	0.512	1	0.914088	1.52318	0.354	0.456	1	0.565577	0.905766	0.288	0.372	1	0.0953363	0.777107	0.354	0.375	1	0.50101	1.40778	0.337	0.464	1	0.914088	0.0395608
Radial Glia	9	VEGFA	0.0148871	0.532091	0.442	0.47	1	0.565549	0.420075	0.371	0.429	1	0.448049	0.717488	0.14	0.182	1	0.469207	0.510282	0.219	0.227	1	0.761395	0.579007	0.191	0.225	1	0.42598	0.629144	0.163	0.203	1	0.761395	0.0860632
Radial Glia	9	RP11-575L7,8	0.382406	0.554888	0.255	0.272	1	0.497419	0.360889	0.211	0.254	1	0.0269546	0.315627	0.098	0.172	1	0.190207	0.554749	0.158	0.213	1	0.909867	0.576331	0.134	0.149	1	0.108909	0.875999	0.163	0.227	1	0.909867	0.151213
Radial Glia	9	SRGAP3	0.356409	0.25074	0.64	0.784	1	0.760485	0.324502	0.62	0.745	1	0.0875371	0.987841	0.579	0.792	1	0.981602	0.699799	0.502	0.712	1	0.955644	0.706162	0.472	0.66	1	0.341438	0.991844	0.473	0.733	1	0.981602	0.422847
Neuronal Precursors	10	NEUROD4	4.28e-263	1.79641	0.665	0.077	1.02e-258	3.55e-155	1.47946	0.595	0.091	8.46e-151	2.89e-175	1.17595	0.55	0.074	6.91e-171	5.88e-204	1.52936	0.554	0.08	1.4e-199	0	1.79985	0.747	0.088	0	1.01e-246	0.992392	0.601	0.11	2.4e-242	3.55e-155	0
Neuronal Precursors	10	DLL3	2.49e-213	2.06021	0.795	0.169	5.95e-209	2.94e-150	1.93107	0.77	0.185	7.02e-146	3.07e-191	2.89841	0.997	0.43	7.32e-187	2.89e-250	2.69151	0.917	0.261	6.89e-246	8.38e-228	2.69247	0.918	0.264	2e-223	0	2.85094	0.996	0.502	0	2.94e-150	0
Neuronal Precursors	10	GADD45G	1.49e-113	2.16298	0.694	0.228	3.55e-109	5.66e-91	2.05556	0.71	0.239	1.35e-86	4.73e-278	2.56996	0.906	0.17	1.13e-273	4.27e-267	2.41753	0.903	0.222	1.02e-262	7.05e-306	2.61197	0.932	0.196	1.68e-301	0	2.57176	0.918	0.189	0	5.66e-91	0
Neuronal Precursors	10	RGS16	1.91e-105	1.61657	0.62	0.179	4.55e-101	7.66e-66	1.34133	0.691	0.274	1.83e-61	0	2.26851	0.814	0.095	0	3.04e-162	1.87629	0.597	0.125	7.25e-158	1.28e-180	1.90042	0.642	0.13	3.05e-176	0	2.61912	0.887	0.116	0	7.66e-66	0
Neuronal Precursors	10	SSTR2	5.15e-36	0.401761	0.19	0.041	1.23e-31	2.23e-66	0.909901	0.353	0.068	5.32e-62	2.25e-199	2.21105	0.847	0.201	5.38e-195	4.22e-82	0.985265	0.411	0.097	1.01e-77	5.77e-130	1.1123	0.469	0.081	1.38e-125	0	2.27511	0.927	0.217	0	5.15e-36	0
Neuronal Precursors	10	HES6	1.14e-142	2.25718	0.947	0.511	2.71e-138	1.01e-106	2.56894	0.97	0.544	2.41e-102	3.55e-162	3.37361	0.997	0.681	8.48e-158	6.7e-145	2.385	0.952	0.61	1.6e-140	2.79e-151	2.54896	0.96	0.533	6.66e-147	8.6e-297	3.01429	1	0.727	2.05e-292	1.01e-106	5.16e-296
Neuronal Precursors	10	EBF2	2.39e-24	0.35461	0.178	0.048	5.71e-20	1.44e-33	0.357589	0.186	0.036	3.44e-29	7.8e-134	0.707352	0.466	0.068	1.86e-129	8.18e-38	0.432788	0.282	0.086	1.95e-33	4.34e-99	0.538456	0.338	0.053	1.04e-94	5.2e-251	0.860864	0.485	0.067	1.24e-246	2.39e-24	3.12e-250
Neuronal Precursors	10	TAGLN3	2.16e-73	1.24678	0.843	0.461	5.16e-69	3.28e-64	1.27996	0.855	0.46	7.83e-60	1.65e-108	1.85068	0.98	0.743	3.93e-104	2.16e-78	1.32254	0.93	0.648	5.16e-74	7.03e-106	1.71709	0.955	0.622	1.68e-101	1.64e-242	1.97993	0.989	0.743	3.92e-238	3.28e-64	9.85e-242
Neuronal Precursors	10	MFNG	2.25e-56	0.423979	0.261	0.05	5.38e-52	1.06e-55	0.512926	0.327	0.068	2.54e-51	4.07e-168	1.13366	0.733	0.152	9.72e-164	1.01e-86	0.526156	0.336	0.064	2.41e-82	1.14e-66	0.473708	0.375	0.094	2.71e-62	2.37e-237	1.19021	0.76	0.21	5.65e-233	1.06e-55	1.42e-236
Neuronal Precursors	10	DLL1	1.34e-102	1.52992	0.596	0.177	3.2e-98	6.46e-58	1.1749	0.513	0.167	1.54e-53	5.74e-183	1.74618	0.73	0.152	1.37e-178	8.1e-131	1.39852	0.634	0.182	1.93e-126	1.66e-140	1.46704	0.739	0.233	3.97e-136	9.42e-228	1.7551	0.715	0.2	2.25e-223	6.46e-58	5.65e-227
Neuronal Precursors	10	NHLH1	2.25e-159	1.35014	0.57	0.093	5.38e-155	3.59e-95	0.98518	0.502	0.098	8.56e-91	2.16e-125	1.242	0.73	0.176	5.15e-121	1.55e-149	1.35462	0.605	0.125	3.71e-145	1.12e-220	1.48046	0.688	0.11	2.67e-216	2.38e-210	1.14288	0.789	0.215	5.69e-206	3.59e-95	6.72e-220
Neuronal Precursors	10	SRRM4	6.18e-82	0.77671	0.561	0.157	1.48e-77	4.91e-69	0.880219	0.569	0.16	1.17e-64	1.5e-115	1.16695	0.801	0.266	3.59e-111	3.75e-102	1.09312	0.664	0.215	8.95e-98	2.51e-117	1.01881	0.605	0.151	6e-113	6.16e-214	1.40908	0.828	0.292	1.47e-209	4.91e-69	3.69e-213
Neuronal Precursors	10	RASGEF1B	2.16e-49	0.395406	0.234	0.046	5.15e-45	3.21e-23	0.251683	0.167	0.04	7.66e-19	2.25e-132	0.714448	0.502	0.08	5.37e-128	2.37e-83	0.451229	0.242	0.034	5.66e-79	8.43e-105	0.463022	0.256	0.029	2.01e-100	1.36e-190	0.736106	0.434	0.07	3.24e-186	3.21e-23	8.13e-190
Neuronal Precursors	10	RND2	9.52e-36	0.590687	0.614	0.335	2.27e-31	4.08e-27	0.903306	0.524	0.273	9.74e-23	6.31e-94	1.6771	0.906	0.634	1.51e-89	1.31e-18	0.741527	0.589	0.437	3.12e-14	3.85e-33	0.843079	0.719	0.504	9.2e-29	3.66e-187	1.58853	0.94	0.638	8.75e-183	1.31e-18	2.2e-186
Neuronal Precursors	10	IGFBPL1	3.07e-56	0.759982	0.537	0.193	7.34e-52	1.01e-57	0.984746	0.703	0.281	2.42e-53	6.78e-102	1.1585	0.879	0.371	1.62e-97	1.08e-88	0.987114	0.72	0.289	2.58e-84	1.89e-76	1.07693	0.707	0.302	4.51e-72	2.49e-180	1.18827	0.898	0.391	5.94e-176	3.07e-56	1.49e-179
Neuronal Precursors	10	PDPN	3.35e-54	0.951741	0.573	0.237	7.99e-50	2.74e-31	0.773236	0.446	0.187	6.53e-27	1.09e-79	0.955755	0.59	0.19	2.59e-75	4.53e-25	0.89494	0.462	0.282	1.08e-20	6.51e-49	1.00238	0.611	0.329	1.55e-44	5.74e-170	1.06118	0.572	0.149	1.37e-165	4.53e-25	3.44e-169
Neuronal Precursors	10	ZBTB18	2.16e-58	0.759567	0.499	0.172	5.16e-54	1.17e-44	0.812329	0.483	0.169	2.8e-40	1.62e-142	0.974202	0.668	0.15	3.87e-138	1.09e-117	0.915795	0.543	0.136	2.6e-113	9.2e-91	0.776782	0.531	0.152	2.2e-86	4e-164	0.924916	0.586	0.162	9.54e-160	1.17e-44	2.4e-163
Neuronal Precursors	10	PCBP4	6.17e-60	0.820837	0.795	0.415	1.47e-55	9.37e-54	0.803904	0.721	0.324	2.24e-49	1.24e-92	1.14531	0.958	0.586	2.97e-88	2.22e-73	1.00554	0.823	0.483	5.3e-69	1.85e-98	1.17405	0.858	0.432	4.42e-94	1.06e-157	1.15709	0.955	0.589	2.54e-153	9.37e-54	6.37e-157
Neuronal Precursors	10	SOX4	2.16e-89	1.3724	0.991	0.878	5.17e-85	1.68e-61	1.19206	0.989	0.87	4.02e-57	3.6e-61	1.09391	0.99	0.953	8.59e-57	1.34e-72	0.938057	0.995	0.92	3.19e-68	1.59e-80	1.1722	0.986	0.882	3.79e-76	1.24e-153	1.29002	0.998	0.946	2.97e-149	3.6e-61	7.46e-153
Neuronal Precursors	10	CCND2	2.78e-52	1.25183	0.828	0.513	6.63e-48	1.96e-49	1.59158	0.84	0.52	4.69e-45	7.56e-92	1.50858	0.909	0.59	1.81e-87	6.14e-71	1.72481	0.782	0.497	1.47e-66	1.35e-79	1.59082	0.832	0.515	3.23e-75	5.54e-152	1.52016	0.895	0.572	1.32e-147	1.96e-49	3.33e-151
Neuronal Precursors	10	PLK3	1.04e-32	0.415488	0.35	0.126	2.47e-28	4.3e-21	0.322793	0.312	0.121	1.03e-16	8.39e-57	0.662039	0.443	0.133	2e-52	1.55e-57	0.475858	0.32	0.082	3.71e-53	1.23e-87	0.637336	0.423	0.096	2.94e-83	5.85e-148	0.875396	0.535	0.141	1.4e-143	4.3e-21	3.51e-147
Neuronal Precursors	10	INSM1	2.8e-66	0.86263	0.386	0.094	6.68e-62	4.68e-32	0.638489	0.279	0.078	1.12e-27	4.34e-87	1.19575	0.661	0.203	1.04e-82	4.08e-79	0.966723	0.53	0.161	9.74e-75	7.86e-85	0.942675	0.46	0.112	1.88e-80	7.74e-140	1.10225	0.664	0.216	1.85e-135	4.68e-32	4.64e-139
Neuronal Precursors	10	CDC42EP4	8.7e-26	0.451378	0.472	0.243	2.08e-21	5.44e-17	0.47403	0.431	0.23	1.3e-12	3.48e-79	1.09987	0.798	0.426	8.31e-75	4.49e-29	0.520207	0.489	0.273	1.07e-24	3.07e-40	0.632121	0.571	0.298	7.34e-36	3.55e-135	1.03846	0.791	0.4	8.48e-131	5.44e-17	2.13e-134
Neuronal Precursors	10	TNNI1	9.46e-30	0.335118	0.154	0.032	2.26e-25	2.1e-31	0.492587	0.23	0.057	5.02e-27	5.83e-77	0.687885	0.362	0.07	1.39e-72	1.03e-33	0.482614	0.156	0.034	2.47e-29	1.08e-56	0.708993	0.298	0.071	2.59e-52	1.05e-126	0.76965	0.383	0.081	2.51e-122	9.46e-30	6.3e-126
Neuronal Precursors	10	FAM60A	1e-65	0.867271	0.955	0.75	2.4e-61	5.14e-36	0.732628	0.914	0.711	1.23e-31	1.64e-80	0.97621	0.964	0.758	3.92e-76	1.65e-43	0.676391	0.914	0.754	3.93e-39	4.44e-42	0.679259	0.906	0.767	1.06e-37	1.61e-126	0.92818	0.956	0.733	3.84e-122	5.14e-36	9.66e-126
Neuronal Precursors	10	ENC1	9.51e-38	0.584023	0.519	0.234	2.27e-33	1.84e-34	0.874329	0.55	0.251	4.39e-30	4.78e-56	0.804044	0.886	0.517	1.14e-51	3.68e-13	0.488177	0.511	0.37	8.78e-09	1.41e-20	0.368681	0.511	0.31	3.37e-16	4.48e-122	0.977655	0.935	0.558	1.07e-117	3.68e-13	2.69e-121
Neuronal Precursors	10	SOX11	4.48e-77	1.21396	0.979	0.78	1.07e-72	6.81e-51	0.975086	0.944	0.76	1.63e-46	3.79e-55	0.870282	0.987	0.846	9.04e-51	7.98e-58	0.849743	0.954	0.79	1.9e-53	3.38e-74	1.0018	0.935	0.742	8.08e-70	2.23e-119	0.972437	0.991	0.847	5.31e-115	6.81e-51	1.34e-118
Neuronal Precursors	10	BTG1	3.14e-23	0.702846	0.911	0.771	7.49e-19	1.67e-12	0.701741	0.881	0.777	3.98e-08	1.76e-72	0.953131	0.987	0.923	4.21e-68	1.18e-57	0.856722	0.981	0.928	2.83e-53	4.8e-45	0.696131	0.957	0.915	1.15e-40	4.23e-118	0.858318	0.993	0.929	1.01e-113	1.67e-12	2.54e-117
Neuronal Precursors	10	CBFA2T2	5.05e-47	0.642402	0.522	0.21	1.21e-42	2.4e-21	0.440203	0.435	0.207	5.73e-17	8.68e-50	0.685993	0.586	0.268	2.07e-45	3.81e-32	0.51002	0.395	0.182	9.09e-28	1.69e-45	0.544247	0.457	0.183	4.03e-41	4.69e-117	0.863545	0.597	0.227	1.12e-112	2.4e-21	2.82e-116
Neuronal Precursors	10	PHLDA1	2.14e-85	1.06586	0.558	0.16	5.11e-81	1.9e-23	0.553081	0.316	0.118	4.55e-19	5.13e-28	0.831275	0.596	0.357	1.23e-23	5.96e-32	0.827162	0.409	0.19	1.42e-27	5.56e-117	1.27211	0.614	0.172	1.33e-112	4.03e-22	0.646937	0.494	0.339	9.62e-18	4.03e-22	3.33e-116
Neuronal Precursors	10	BCL7A	3.64e-63	0.847008	0.828	0.488	8.69e-59	1.95e-25	0.641323	0.699	0.452	4.65e-21	7.86e-66	0.914379	0.906	0.647	1.88e-61	1.14e-36	0.674961	0.734	0.526	2.73e-32	4.22e-36	0.601542	0.696	0.453	1.01e-31	4.01e-113	0.976604	0.88	0.623	9.58e-109	1.95e-25	2.41e-112
Neuronal Precursors	10	RCOR2	6.52e-60	0.782213	0.7	0.324	1.56e-55	1.93e-31	0.635298	0.587	0.292	4.61e-27	7.6e-58	0.728876	0.814	0.482	1.81e-53	1.17e-31	0.456824	0.565	0.323	2.79e-27	4.56e-32	0.504098	0.56	0.307	1.09e-27	1.52e-110	0.895647	0.846	0.496	3.62e-106	1.93e-31	9.09e-110
Neuronal Precursors	10	POU3F2	4.04e-33	0.684814	0.801	0.553	9.64e-29	1.19e-29	0.687479	0.84	0.578	2.83e-25	5.03e-58	0.81252	0.909	0.564	1.2e-53	2.25e-27	0.60644	0.72	0.521	5.37e-23	4.82e-42	0.665555	0.77	0.485	1.15e-37	4.86e-110	0.96149	0.9	0.562	1.16e-105	2.25e-27	2.92e-109
Neuronal Precursors	10	TFDP2	1.77e-67	1.16227	0.887	0.575	4.24e-63	2.18e-46	1.04369	0.881	0.616	5.2e-42	2.3e-80	1.20336	0.906	0.623	5.49e-76	1.55e-52	0.975826	0.825	0.635	3.7e-48	3.12e-49	0.901421	0.793	0.596	7.45e-45	7.62e-110	1.09858	0.84	0.582	1.82e-105	2.18e-46	4.57e-109
Neuronal Precursors	10	SH3BGRL3	9.72e-42	1.01221	0.763	0.517	2.32e-37	8.03e-32	0.971356	0.755	0.507	1.92e-27	1.18e-39	1.22733	0.902	0.846	2.82e-35	1.25e-07	0.455822	0.815	0.773	0.00299017	6.67e-22	0.748899	0.795	0.707	1.59e-17	4.3e-102	1.26524	0.922	0.827	1.03e-97	1.25e-07	2.58e-101
Neuronal Precursors	10	ST18	6.8e-19	0.420306	0.261	0.104	1.62e-14	2.89e-35	0.462694	0.305	0.081	6.89e-31	5.66e-55	0.455317	0.384	0.096	1.35e-50	5.71e-28	0.320171	0.212	0.064	1.36e-23	6.24e-50	0.426564	0.233	0.047	1.49e-45	1.18e-101	0.541743	0.377	0.092	2.81e-97	6.8e-19	7.06e-101
Neuronal Precursors	10	ELAVL2	6.17e-99	1.16996	0.73	0.251	1.47e-94	9.06e-46	0.783746	0.599	0.24	2.16e-41	2.99e-53	0.81233	0.736	0.352	7.15e-49	6.91e-66	0.922746	0.707	0.346	1.65e-61	2.99e-101	1.1219	0.747	0.285	7.14e-97	4.43e-78	0.679307	0.67	0.322	1.06e-73	9.06e-46	1.79e-100
Neuronal Precursors	10	LINC01158	9.8e-28	0.562953	0.789	0.521	2.34e-23	1.04e-14	0.526137	0.636	0.436	2.49e-10	2.08e-50	0.916302	0.86	0.542	4.97e-46	3.17e-34	0.762426	0.777	0.558	7.58e-30	5.71e-10	0.327751	0.648	0.522	1.36e-05	7.87e-95	0.904233	0.838	0.502	1.88e-90	5.71e-10	4.72e-94
Neuronal Precursors	10	PPP1R14C	5.78e-56	0.673692	0.294	0.065	1.38e-51	1.03e-31	0.678619	0.234	0.059	2.45e-27	2.88e-08	0.350414	0.267	0.162	0.000688211	1.52e-22	0.636289	0.274	0.12	3.63e-18	1.09e-94	1.0304	0.574	0.175	2.6e-90	7.67e-21	0.457516	0.243	0.121	1.83e-16	2.88e-08	6.54e-94
Neuronal Precursors	10	PRDX1	8.29e-11	0.328129	0.819	0.694	1.98e-06	2.4e-07	0.326898	0.803	0.716	0.00571875	3.12e-42	0.690442	0.993	0.914	7.44e-38	2.48e-13	0.413575	0.944	0.903	5.91e-09	2.97e-19	0.522525	0.966	0.917	7.08e-15	3.03e-94	0.783997	0.984	0.903	7.24e-90	2.4e-07	1.82e-93
Neuronal Precursors	10	DCC	9.34e-59	0.679608	0.525	0.177	2.23e-54	8.52e-45	0.796912	0.52	0.19	2.03e-40	3.42e-60	0.653749	0.632	0.251	8.17e-56	2.5e-93	1.01821	0.594	0.195	5.97e-89	2.15e-69	0.786388	0.531	0.182	5.12e-65	8.07e-65	0.560104	0.535	0.246	1.93e-60	8.52e-45	1.5e-92
Neuronal Precursors	10	KALRN	1.53e-35	0.346297	0.347	0.115	3.64e-31	4.75e-21	0.360622	0.32	0.123	1.13e-16	3.03e-39	0.584607	0.541	0.242	7.24e-35	6.83e-15	0.288962	0.312	0.166	1.63e-10	7.55e-35	0.404904	0.315	0.107	1.8e-30	4.16e-93	0.682362	0.588	0.235	9.94e-89	6.83e-15	2.5e-92
Neuronal Precursors	10	ZEB1	7.2e-20	0.40963	0.671	0.455	1.72e-15	6.29e-12	0.385876	0.617	0.437	1.5e-07	1.03e-59	0.893976	0.834	0.549	2.47e-55	1.32e-15	0.434706	0.594	0.443	3.14e-11	2.39e-17	0.405055	0.585	0.425	5.7e-13	5.62e-92	0.896914	0.824	0.553	1.34e-87	6.29e-12	3.37e-91
Neuronal Precursors	10	NIN	3.89e-53	0.940428	0.593	0.26	9.28e-49	4.97e-24	0.601693	0.472	0.226	1.19e-19	3.84e-79	0.925345	0.678	0.268	9.17e-75	4.42e-30	0.705793	0.538	0.318	1.06e-25	2.07e-34	0.632964	0.503	0.259	4.94e-30	3.27e-91	1.01972	0.583	0.265	7.81e-87	4.97e-24	1.96e-90
Neuronal Precursors	10	MSI2	1.12e-24	0.580395	0.798	0.616	2.67e-20	7.32e-24	0.611725	0.829	0.617	1.75e-19	5.63e-57	0.891476	0.873	0.619	1.34e-52	2.94e-10	0.339837	0.691	0.604	7.02e-06	3.15e-15	0.375921	0.699	0.537	7.52e-11	6.2e-91	0.829904	0.826	0.547	1.48e-86	2.94e-10	3.72e-90
Neuronal Precursors	10	MIAT	4.42e-74	1.5828	0.896	0.551	1.06e-69	2.24e-38	0.951176	0.799	0.491	5.34e-34	6.64e-59	0.818858	0.857	0.433	1.59e-54	9.07e-68	1.07173	0.712	0.353	2.17e-63	3.42e-89	1.17394	0.784	0.355	8.16e-85	6.7e-85	0.814816	0.804	0.438	1.6e-80	2.24e-38	2.05e-88
Neuronal Precursors	10	CHD7	4.14e-45	0.786337	0.905	0.678	9.87e-41	3.12e-21	0.57949	0.829	0.624	7.45e-17	9.13e-76	0.953917	0.935	0.694	2.18e-71	2.56e-49	0.756911	0.855	0.665	6.12e-45	6.32e-31	0.625104	0.838	0.651	1.51e-26	6.55e-88	0.78941	0.917	0.718	1.56e-83	3.12e-21	3.93e-87
Neuronal Precursors	10	RPS27L	2.78e-28	0.650086	0.899	0.76	6.63e-24	3.09e-13	0.516817	0.888	0.77	7.38e-09	2.15e-48	0.800524	0.977	0.841	5.12e-44	2.04e-15	0.392308	0.925	0.841	4.86e-11	3.88e-17	0.390373	0.929	0.884	9.26e-13	9.85e-79	0.795575	0.96	0.833	2.35e-74	3.09e-13	5.91e-78
Neuronal Precursors	10	ZC3H12C	3.15e-66	0.595943	0.427	0.113	7.52e-62	1.66e-36	0.50485	0.379	0.122	3.96e-32	6.71e-51	0.685564	0.567	0.25	1.6e-46	2.63e-74	0.709393	0.468	0.142	6.28e-70	1.64e-51	0.577711	0.389	0.126	3.91e-47	3.78e-78	0.686395	0.543	0.24	9.03e-74	1.66e-36	2.27e-77
Neuronal Precursors	10	UBE2L6	6e-28	0.510699	0.54	0.299	1.43e-23	1.38e-11	0.531685	0.454	0.293	3.3e-07	2.24e-21	0.496167	0.733	0.597	5.36e-17	5.08e-13	0.429771	0.589	0.491	1.21e-08	8.54e-33	0.697922	0.713	0.503	2.04e-28	5.14e-71	0.723901	0.795	0.571	1.23e-66	1.38e-11	3.09e-70
Neuronal Precursors	10	BTBD17	1.99e-25	0.349295	0.261	0.092	4.76e-21	8.81e-12	0.281412	0.253	0.121	2.1e-07	3.37e-38	0.760361	0.56	0.283	8.04e-34	4.62e-28	0.757151	0.454	0.244	1.1e-23	2.46e-29	0.743965	0.514	0.29	5.87e-25	3.29e-69	0.897982	0.583	0.297	7.87e-65	8.81e-12	1.98e-68
Neuronal Precursors	10	MIB1	1.14e-49	0.859217	0.804	0.513	2.73e-45	2.92e-23	0.617403	0.751	0.504	6.97e-19	5.86e-45	0.782453	0.762	0.515	1.4e-40	4.16e-20	0.556442	0.602	0.464	9.92e-16	1.62e-25	0.612448	0.634	0.445	3.86e-21	1.87e-68	0.823067	0.719	0.483	4.45e-64	4.16e-20	1.12e-67
Neuronal Precursors	10	IGFBP2	1.02e-27	0.738587	0.947	0.831	2.44e-23	3.14e-20	0.66989	0.929	0.815	7.48e-16	2.12e-40	0.878221	0.987	0.921	5.07e-36	6.83e-46	0.937899	0.978	0.912	1.63e-41	1.02e-11	0.4597	0.949	0.932	2.43e-07	3.19e-68	0.72974	0.989	0.931	7.62e-64	1.02e-11	1.91e-67
Neuronal Precursors	10	ELAVL3	5.54e-24	0.486453	0.795	0.516	1.32e-19	1.43e-20	0.512142	0.755	0.517	3.41e-16	5.78e-31	0.519804	0.86	0.551	1.38e-26	1.39e-19	0.465444	0.712	0.535	3.33e-15	5.92e-33	0.577625	0.747	0.487	1.41e-28	5.79e-68	0.663269	0.875	0.559	1.38e-63	1.39e-19	3.47e-67
Neuronal Precursors	10	TEAD1	6.54e-12	0.353305	0.531	0.363	1.56e-07	3.12e-14	0.55067	0.532	0.342	7.44e-10	8.6e-38	0.762245	0.765	0.549	2.05e-33	1.26e-07	0.29746	0.465	0.373	0.00301962	2.31e-08	0.271922	0.491	0.381	0.000552451	9.66e-67	0.788948	0.753	0.51	2.31e-62	1.26e-07	5.8e-66
Neuronal Precursors	10	TCF12	3.41e-62	0.974598	0.792	0.459	8.15e-58	6.76e-28	0.777866	0.743	0.482	1.61e-23	5.09e-57	0.891359	0.873	0.636	1.21e-52	3.05e-44	0.786293	0.801	0.626	7.28e-40	1.39e-33	0.626292	0.739	0.523	3.32e-29	5.06e-66	0.703688	0.828	0.61	1.21e-61	6.76e-28	3.04e-65
Neuronal Precursors	10	DDX5	1.22e-21	0.488801	0.973	0.877	2.91e-17	5.9e-18	0.478604	0.959	0.854	1.41e-13	1.31e-20	0.363451	0.993	0.966	3.13e-16	1.21e-25	0.416041	0.981	0.957	2.89e-21	4.07e-21	0.382171	0.969	0.946	9.71e-17	4.75e-64	0.532571	0.996	0.958	1.13e-59	5.9e-18	2.85e-63
Neuronal Precursors	10	MLLT4	2.18e-63	1.05442	0.92	0.626	5.21e-59	1.74e-30	0.789958	0.84	0.624	4.14e-26	7.71e-21	0.542793	0.788	0.631	1.84e-16	5.94e-28	0.59461	0.833	0.686	1.42e-23	7.36e-35	0.635414	0.83	0.639	1.76e-30	5.12e-27	0.461375	0.733	0.592	1.22e-22	7.71e-21	1.31e-62
Neuronal Precursors	10	SETBP1	6.11e-54	0.810812	0.721	0.377	1.46e-49	8.14e-33	0.738405	0.673	0.363	1.94e-28	3.37e-46	0.739276	0.752	0.44	8.05e-42	5.85e-48	0.806637	0.648	0.381	1.4e-43	2.06e-39	0.66454	0.614	0.339	4.92e-35	2.97e-60	0.680638	0.666	0.405	7.1e-56	8.14e-33	1.78e-59
Neuronal Precursors	10	LRRN1	5.88e-52	0.870927	0.611	0.283	1.4e-47	2.85e-48	0.997303	0.647	0.291	6.79e-44	1.71e-23	0.608666	0.518	0.291	4.09e-19	8.13e-54	0.995562	0.707	0.422	1.94e-49	4.71e-60	0.884402	0.724	0.4	1.13e-55	3.17e-15	0.343785	0.401	0.273	7.57e-11	3.17e-15	2.83e-59
Neuronal Precursors	10	SSBP3	1.18e-19	0.387102	0.688	0.455	2.82e-15	1.71e-16	0.424592	0.643	0.414	4.09e-12	3.93e-27	0.510326	0.853	0.715	9.38e-23	5.71e-16	0.364592	0.661	0.514	1.36e-11	2.33e-16	0.383524	0.662	0.501	5.57e-12	5.69e-60	0.595642	0.844	0.676	1.36e-55	5.71e-16	3.41e-59
Neuronal Precursors	10	KLHDC8A	7.39e-59	0.609303	0.475	0.153	1.76e-54	2.41e-50	0.769378	0.465	0.145	5.75e-46	3.4e-29	0.614646	0.521	0.257	8.12e-25	2.16e-54	0.909187	0.583	0.281	5.15e-50	8.99e-56	0.779601	0.625	0.302	2.15e-51	1.43e-24	0.385981	0.441	0.26	3.41e-20	1.43e-24	4.44e-58
Neuronal Precursors	10	RPAIN	9.19e-24	0.467607	0.843	0.642	2.19e-19	4.64e-09	0.269182	0.77	0.621	0.000110674	7.05e-29	0.495299	0.954	0.859	1.68e-24	3.76e-22	0.40511	0.892	0.811	8.97e-18	2.34e-16	0.402098	0.872	0.791	5.59e-12	1.41e-56	0.51498	0.936	0.83	3.36e-52	4.64e-09	8.45e-56
Neuronal Precursors	10	JAG1	1.01e-27	1.80778	0.567	0.357	2.41e-23	2.62e-11	0.980546	0.465	0.327	6.26e-07	7e-25	1.1763	0.518	0.32	1.67e-20	6.93e-21	1.46164	0.449	0.293	1.65e-16	1.44e-56	1.75738	0.645	0.353	3.43e-52	6.95e-11	0.622629	0.439	0.366	1.66e-06	6.95e-11	8.61e-56
Neuronal Precursors	10	PHC2	2.29e-52	0.653002	0.691	0.33	5.46e-48	2.08e-28	0.608839	0.587	0.306	4.97e-24	7.13e-24	0.529912	0.772	0.615	1.7e-19	2.51e-49	0.745659	0.755	0.512	6e-45	7e-41	0.671916	0.747	0.494	1.67e-36	3.54e-31	0.408445	0.715	0.584	8.45e-27	7.13e-24	1.37e-51
Neuronal Precursors	10	TCF4	1.39e-51	0.978784	0.715	0.393	3.32e-47	1.08e-16	0.437452	0.55	0.333	2.57e-12	3.99e-19	0.456737	0.801	0.648	9.51e-15	2.11e-15	0.472136	0.613	0.482	5.04e-11	2.04e-09	0.301783	0.619	0.508	4.86e-05	8.28e-40	0.57083	0.777	0.596	1.98e-35	2.04e-09	8.34e-51
Neuronal Precursors	10	GNG5	1.85e-31	0.60098	0.905	0.699	4.43e-27	4.34e-24	0.55226	0.9	0.713	1.04e-19	1.48e-35	0.583908	0.993	0.845	3.53e-31	1.75e-31	0.539958	0.968	0.847	4.18e-27	1.25e-29	0.455218	0.98	0.891	2.99e-25	8.48e-51	0.510672	0.967	0.867	2.02e-46	4.34e-24	5.09e-50
Neuronal Precursors	10	DAAM1	1.22e-50	1.22688	0.881	0.632	2.92e-46	6.06e-25	0.717866	0.81	0.554	1.45e-20	4.86e-08	0.534775	0.798	0.735	0.00115906	2.09e-08	0.35833	0.739	0.664	0.000499638	9.55e-18	0.50549	0.781	0.649	2.28e-13	8.05e-31	0.529251	0.842	0.699	1.92e-26	4.86e-08	7.34e-50
Neuronal Precursors	10	TOX3	4.54e-25	0.536847	0.703	0.468	1.08e-20	2.14e-12	0.382068	0.647	0.455	5.1e-08	4.98e-27	0.542785	0.795	0.554	1.19e-22	2.84e-30	0.580437	0.785	0.58	6.78e-26	1.21e-25	0.495741	0.693	0.504	2.89e-21	6.44e-50	0.55539	0.748	0.501	1.54e-45	2.14e-12	3.86e-49
Neuronal Precursors	10	RCN2	2.13e-31	0.515903	0.944	0.803	5.08e-27	2.08e-22	0.461299	0.914	0.763	4.96e-18	2.4e-33	0.487233	0.99	0.937	5.73e-29	4.41e-48	0.583336	0.973	0.916	1.05e-43	9.72e-47	0.602905	0.963	0.923	2.32e-42	2.2e-49	0.482789	0.973	0.924	5.25e-45	2.08e-22	1.32e-48
Neuronal Precursors	10	RHOBTB3	5.97e-23	0.477156	0.774	0.558	1.42e-18	4.4e-10	0.389092	0.639	0.485	1.05e-05	6.1e-29	0.578312	0.844	0.682	1.46e-24	3.41e-17	0.428805	0.785	0.7	8.14e-13	7.6e-10	0.269385	0.753	0.669	1.82e-05	1.08e-48	0.532373	0.833	0.653	2.57e-44	7.6e-10	6.46e-48
Neuronal Precursors	10	SPAG9	4.94e-23	0.50137	0.858	0.687	1.18e-18	2.89e-12	0.437994	0.822	0.696	6.91e-08	1.34e-37	0.687816	0.873	0.736	3.19e-33	1.64e-15	0.424586	0.815	0.744	3.92e-11	3.16e-11	0.292374	0.759	0.672	7.54e-07	1.34e-47	0.697365	0.806	0.684	3.21e-43	3.16e-11	8.07e-47
Neuronal Precursors	10	IGDCC3	6.57e-43	0.888869	0.846	0.596	1.57e-38	7.44e-28	0.792219	0.703	0.429	1.78e-23	3.39e-45	0.727156	0.681	0.37	8.1e-41	2.53e-23	0.726855	0.731	0.558	6.04e-19	6.27e-35	0.741239	0.83	0.625	1.5e-30	4.4e-47	0.526709	0.673	0.423	1.05e-42	2.53e-23	2.64e-46
Neuronal Precursors	10	NCKAP5	1.13e-14	0.413649	0.504	0.324	2.69e-10	4.8e-11	0.43893	0.472	0.305	1.15e-06	1.45e-25	0.56731	0.577	0.342	3.46e-21	1.67e-37	0.788543	0.586	0.339	3.99e-33	1.84e-42	0.80995	0.551	0.269	4.4e-38	8.22e-47	0.617887	0.514	0.281	1.96e-42	4.8e-11	4.93e-46
Neuronal Precursors	10	DACH1	5.62e-11	0.36266	0.531	0.369	1.34e-06	7.1e-06	0.301329	0.45	0.338	0.169492	1.33e-17	0.402697	0.811	0.696	3.17e-13	9.1e-08	0.318031	0.591	0.515	0.0021714	2.23e-10	0.336907	0.651	0.518	5.33e-06	6.73e-46	0.532384	0.853	0.692	1.61e-41	7.1e-06	4.04e-45
Neuronal Precursors	10	NKAIN4	2.35e-45	0.778758	0.745	0.424	5.61e-41	2.78e-30	0.732538	0.654	0.363	6.65e-26	7.1e-28	0.456284	0.919	0.692	1.7e-23	4.02e-21	0.482512	0.772	0.621	9.6e-17	9.36e-28	0.670582	0.776	0.609	2.23e-23	3.84e-36	0.438791	0.86	0.7	9.18e-32	4.02e-21	1.41e-44
Neuronal Precursors	10	SGK223	2.02e-24	0.421995	0.312	0.124	4.82e-20	2.08e-14	0.371325	0.268	0.12	4.97e-10	4.67e-18	0.304074	0.375	0.195	1.12e-13	2.61e-44	0.513696	0.382	0.14	6.22e-40	1.24e-16	0.373608	0.327	0.174	2.96e-12	4.73e-24	0.346909	0.338	0.187	1.13e-19	2.08e-14	1.56e-43
Neuronal Precursors	10	GLUL	1.02e-19	0.426539	0.76	0.576	2.44e-15	2.61e-09	0.298136	0.71	0.57	6.24e-05	2.73e-31	0.60584	0.844	0.67	6.51e-27	1.01e-30	0.563251	0.79	0.644	2.42e-26	3.1e-25	0.502778	0.815	0.634	7.39e-21	2.68e-44	0.596435	0.797	0.661	6.4e-40	2.61e-09	1.61e-43
Neuronal Precursors	10	GPC2	5.6e-41	0.600054	0.721	0.396	1.34e-36	2.22e-26	0.569725	0.654	0.366	5.3e-22	7.93e-26	0.348387	0.893	0.581	1.89e-21	1.82e-35	0.503833	0.712	0.433	4.34e-31	3.05e-33	0.450396	0.653	0.367	7.29e-29	5.2e-44	0.373889	0.88	0.597	1.24e-39	7.93e-26	3.12e-43
Neuronal Precursors	10	RHOU	5.6e-43	0.727168	0.466	0.184	1.34e-38	1.51e-10	0.381477	0.335	0.19	3.61e-06	6.21e-17	0.343928	0.362	0.186	1.48e-12	8.13e-27	0.54929	0.446	0.238	1.94e-22	2.02e-38	0.643167	0.46	0.201	4.82e-34	1.76e-33	0.399616	0.336	0.16	4.21e-29	1.51e-10	3.36e-42
Neuronal Precursors	10	MAGI1	2.41e-29	0.59616	0.564	0.311	5.75e-25	4.97e-16	0.357419	0.476	0.267	1.19e-11	6.95e-31	0.614432	0.648	0.413	1.66e-26	4.63e-16	0.468264	0.462	0.309	1.11e-11	3.17e-42	0.634359	0.551	0.272	7.56e-38	8.73e-34	0.528261	0.615	0.437	2.09e-29	4.97e-16	1.9e-41
Neuronal Precursors	10	SLC6A8	4.07e-38	0.587391	0.647	0.353	9.71e-34	7.76e-16	0.379986	0.487	0.271	1.85e-11	6.66e-11	0.327708	0.443	0.313	1.59e-06	5.87e-28	0.487124	0.505	0.285	1.4e-23	4.27e-33	0.54261	0.571	0.314	1.02e-28	1.68e-16	0.330528	0.417	0.291	4.01e-12	6.66e-11	2.44e-37
Neuronal Precursors	10	PAK3	3.18e-11	0.268837	0.472	0.304	7.58e-07	5.5e-15	0.30839	0.476	0.261	1.31e-10	8.71e-22	0.438945	0.606	0.362	2.08e-17	3.83e-08	0.274132	0.484	0.375	0.0009152	3.2e-13	0.360969	0.619	0.461	7.65e-09	3.15e-37	0.482942	0.575	0.354	7.53e-33	3.83e-08	1.89e-36
Neuronal Precursors	10	MAP6	2.27e-20	0.423537	0.745	0.554	5.43e-16	4.68e-10	0.267441	0.729	0.554	1.12e-05	1.87e-14	0.374239	0.853	0.757	4.48e-10	1.05e-16	0.370185	0.806	0.674	2.52e-12	3.41e-37	0.624451	0.875	0.679	8.13e-33	1.54e-35	0.422144	0.886	0.749	3.68e-31	4.68e-10	2.04e-36
Neuronal Precursors	10	COTL1	8.21e-15	0.547972	0.671	0.529	1.96e-10	0.000122633	0.29514	0.55	0.475	1	9.85e-28	0.701415	0.844	0.693	2.35e-23	6.17e-18	0.707145	0.745	0.649	1.47e-13	9.07e-36	0.803587	0.835	0.663	2.17e-31	2.17e-36	0.490888	0.84	0.695	5.19e-32	0.000122633	1.3e-35
Neuronal Precursors	10	GADD45A	3.01e-12	0.303846	0.549	0.37	7.19e-08	4.98e-16	0.509087	0.647	0.432	1.19e-11	2.85e-19	0.407361	0.466	0.265	6.8e-15	3.15e-15	0.54379	0.556	0.41	7.53e-11	6.76e-36	0.80841	0.628	0.37	1.61e-31	2.77e-15	0.420348	0.367	0.241	6.62e-11	3.01e-12	4.06e-35
Neuronal Precursors	10	BAZ2B	4.62e-21	0.426308	0.7	0.485	1.1e-16	4.43e-13	0.372996	0.636	0.434	1.06e-08	7.03e-24	0.469147	0.814	0.662	1.68e-19	7.25e-16	0.382464	0.707	0.587	1.73e-11	5.99e-11	0.314346	0.665	0.532	1.43e-06	3.05e-34	0.487984	0.77	0.625	7.29e-30	5.99e-11	1.83e-33
Neuronal Precursors	10	AGO1	7.94e-33	0.558307	0.573	0.298	1.9e-28	6.72e-11	0.317466	0.413	0.254	1.6e-06	3.37e-10	0.313836	0.459	0.33	8.05e-06	1.88e-16	0.361896	0.417	0.262	4.5e-12	3.69e-12	0.290423	0.386	0.245	8.8e-08	1.69e-11	0.252088	0.401	0.299	4.03e-07	3.37e-10	4.76e-32
Neuronal Precursors	10	MEST	1.33e-32	0.657134	0.864	0.66	3.16e-28	6.7e-18	0.559452	0.781	0.602	1.6e-13	7.2e-30	0.642202	0.919	0.707	1.72e-25	1.08e-29	0.575659	0.78	0.586	2.59e-25	1.87e-26	0.53661	0.875	0.732	4.46e-22	6.44e-19	0.35137	0.877	0.743	1.54e-14	6.7e-18	7.95e-32
Neuronal Precursors	10	ATP6V0E1	2.28e-16	0.380705	0.608	0.42	5.45e-12	2.27e-07	0.294114	0.532	0.39	0.0054189	7.08e-32	0.503884	0.886	0.719	1.69e-27	7.73e-27	0.539488	0.742	0.586	1.85e-22	9.94e-30	0.583459	0.849	0.698	2.37e-25	2.42e-29	0.424065	0.802	0.682	5.79e-25	2.27e-07	4.25e-31
Neuronal Precursors	10	SYT1	7.52e-12	0.309847	0.513	0.331	1.79e-07	1.08e-15	0.497914	0.68	0.449	2.57e-11	1.6e-11	0.429427	0.769	0.628	3.82e-07	2.17e-16	0.439153	0.72	0.532	5.19e-12	1.45e-12	0.276723	0.631	0.461	3.46e-08	9.78e-32	0.507988	0.846	0.669	2.33e-27	1.6e-11	5.87e-31
Neuronal Precursors	10	CKB	6.49e-25	0.541767	0.991	0.928	1.55e-20	4.09e-21	0.675395	0.97	0.895	9.77e-17	1.31e-18	0.601845	0.99	0.956	3.12e-14	2.89e-30	0.699804	0.995	0.946	6.9e-26	1.18e-20	0.616564	0.98	0.945	2.81e-16	4.94e-07	0.288865	0.996	0.952	0.011782	4.94e-07	1.73e-29
Neuronal Precursors	10	KDM5B	1e-27	0.544706	0.807	0.569	2.4e-23	2.31e-18	0.48467	0.747	0.549	5.51e-14	1e-13	0.304518	0.866	0.766	2.4e-09	4.04e-30	0.52691	0.86	0.704	9.65e-26	1.83e-16	0.366676	0.778	0.643	4.36e-12	5.27e-23	0.357882	0.833	0.728	1.26e-18	1e-13	2.42e-29
Neuronal Precursors	10	CASC15	1.08e-27	0.356028	0.371	0.151	2.57e-23	1.92e-19	0.417388	0.398	0.189	4.59e-15	1.56e-29	0.466695	0.616	0.365	3.72e-25	2.58e-23	0.450668	0.425	0.233	6.17e-19	2.8e-12	0.311194	0.321	0.185	6.69e-08	2.53e-26	0.42523	0.508	0.344	6.03e-22	2.8e-12	9.36e-29
Neuronal Precursors	10	DUSP1	2.18e-10	0.351438	0.454	0.298	5.21e-06	7.73e-09	0.338891	0.48	0.328	0.000184656	1.62e-20	0.482746	0.671	0.483	3.86e-16	2.62e-06	0.303824	0.546	0.475	0.0626389	7.56e-29	0.608029	0.713	0.481	1.81e-24	5.51e-22	0.452926	0.583	0.44	1.31e-17	2.62e-06	4.54e-28
Neuronal Precursors	10	FBXW7	1.29e-21	0.49107	0.558	0.338	3.08e-17	2.13e-09	0.431157	0.457	0.309	5.09e-05	2.94e-19	0.375117	0.502	0.302	7.02e-15	5.53e-15	0.372411	0.473	0.319	1.32e-10	6.02e-08	0.340701	0.378	0.274	0.0014383	9.31e-19	0.324603	0.423	0.285	2.22e-14	6.02e-08	7.75e-21
Neuronal Precursors	10	PHF6	3.97e-17	0.388464	0.774	0.578	9.47e-13	6.31e-14	0.401353	0.766	0.581	1.51e-09	1.06e-15	0.326765	0.831	0.733	2.54e-11	6.97e-09	0.288373	0.747	0.682	0.000166483	2.43e-14	0.365241	0.736	0.626	5.8e-10	5.08e-18	0.305264	0.771	0.702	1.21e-13	6.97e-09	3.05e-17
Radial Glia	11	OLIG3	8.58e-44	0.537191	0.243	0.029	2.05e-39	4.51e-90	1.09825	0.508	0.099	1.08e-85	1.46e-95	0.89542	0.871	0.4	3.49e-91	1.78e-280	1.47533	0.816	0.101	4.25e-276	3.48e-161	1.32952	0.759	0.172	8.3e-157	4.72e-124	0.700992	0.9	0.535	1.13e-119	8.58e-44	1.07e-279
Radial Glia	11	RND2	4.31e-14	0.896659	0.579	0.345	1.03e-09	1.69e-59	1.24784	0.665	0.269	4.02e-55	6.1e-122	1.41148	0.942	0.629	1.46e-117	2.38e-122	1.86836	0.91	0.428	5.68e-118	1.26e-90	1.39582	0.868	0.5	3.01e-86	3.22e-256	1.32806	0.973	0.627	7.68e-252	4.31e-14	1.93e-255
Radial Glia	11	C1orf61	2.84e-39	1.66974	0.607	0.197	6.77e-35	2.74e-155	1.82829	0.669	0.109	6.55e-151	2.5e-54	1.2858	0.512	0.201	5.96e-50	1.79e-232	2.30086	0.677	0.084	4.28e-228	9.72e-227	1.89874	0.59	0.069	2.32e-222	7.94e-104	1.21771	0.6	0.27	1.89e-99	2.84e-39	1.08e-231
Radial Glia	11	HES6	3.08e-39	2.33034	0.857	0.528	7.35e-35	3.57e-93	2.903	0.915	0.549	8.53e-89	3.25e-108	1.70548	0.953	0.68	7.76e-104	1.06e-100	2.6868	0.917	0.616	2.53e-96	4.86e-95	2.50026	0.895	0.538	1.16e-90	8.53e-229	1.50587	0.978	0.721	2.04e-224	3.08e-39	5.12e-228
Radial Glia	11	DLL1	9.9e-07	0.287375	0.357	0.197	0.0236336	9.72e-24	0.728899	0.407	0.172	2.32e-19	3.02e-83	0.769559	0.528	0.157	7.2e-79	1.63e-52	0.695838	0.556	0.191	3.88e-48	9.09e-30	0.615562	0.502	0.246	2.17e-25	3.5e-218	1.04564	0.649	0.191	8.35e-214	9.9e-07	2.1e-217
Radial Glia	11	ID4	2.36e-05	0.69524	0.571	0.467	0.564031	5.68e-54	1.57324	0.788	0.422	1.36e-49	8.35e-72	0.972206	0.982	0.765	1.99e-67	3.71e-76	1.58178	0.944	0.655	8.85e-72	4.88e-77	1.41799	0.925	0.621	1.16e-72	4.54e-202	1.22921	0.97	0.694	1.08e-197	2.36e-05	2.73e-201
Radial Glia	11	ID3	6.9e-18	1.38783	0.457	0.206	1.65e-13	6.6e-44	1.58446	0.602	0.257	1.58e-39	5.29e-99	1.32738	0.971	0.622	1.26e-94	2.57e-84	1.83986	0.914	0.504	6.14e-80	8.36e-76	1.84794	0.827	0.465	2e-71	2.07e-176	1.29583	0.954	0.591	4.93e-172	6.9e-18	1.24e-175
Radial Glia	11	ID1	2.67e-17	1.51317	0.429	0.186	6.38e-13	5.34e-83	1.89931	0.691	0.226	1.28e-78	7.27e-93	1.32625	0.948	0.574	1.74e-88	6.33e-87	1.58819	0.883	0.423	1.51e-82	1.25e-84	1.69985	0.851	0.465	2.99e-80	3.77e-168	1.23264	0.923	0.551	9e-164	2.67e-17	2.26e-167
Radial Glia	11	LRRN1	0.0717805	0.259252	0.357	0.3	1	2.92e-32	0.833987	0.606	0.294	6.98e-28	9.7e-65	0.661739	0.643	0.281	2.32e-60	2.3e-39	0.884803	0.729	0.425	5.5e-35	3.33e-19	0.517238	0.603	0.407	7.94e-15	7.5e-168	0.793586	0.652	0.247	1.79e-163	0.0717805	4.5e-167
Radial Glia	11	ID2	3.33e-14	0.870407	0.65	0.398	7.95e-10	1.27e-26	1.14485	0.627	0.373	3.03e-22	2.22e-70	0.953613	0.903	0.605	5.29e-66	5.83e-53	1.16033	0.891	0.594	1.39e-48	7.19e-41	1.01955	0.868	0.632	1.72e-36	9.21e-165	1.06118	0.876	0.515	2.2e-160	3.33e-14	5.52e-164
Radial Glia	11	CXCR4	0.000150593	0.558643	0.429	0.311	1	2.25e-18	0.695504	0.517	0.294	5.37e-14	1.19e-107	1.20478	0.979	0.553	2.84e-103	2.55e-40	0.689851	0.793	0.428	6.08e-36	4.59e-17	0.507353	0.651	0.466	1.09e-12	6.44e-159	0.956369	0.965	0.57	1.54e-154	0.000150593	3.86e-158
Radial Glia	11	TMEM158	7.7e-12	0.489882	0.35	0.146	1.84e-07	2.78e-31	0.644545	0.458	0.178	6.63e-27	1.55e-62	0.657223	0.633	0.274	3.7e-58	7.34e-49	0.7096	0.62	0.255	1.75e-44	2.92e-32	0.567293	0.525	0.252	6.98e-28	1.76e-143	0.741008	0.709	0.31	4.2e-139	7.7e-12	1.06e-142
Radial Glia	11	TFDP2	2.62e-11	0.776383	0.764	0.589	6.26e-07	4.78e-22	0.706064	0.809	0.62	1.14e-17	1.35e-65	0.769965	0.892	0.621	3.21e-61	3.67e-31	0.647835	0.88	0.636	8.76e-27	4.05e-21	0.495356	0.783	0.598	9.66e-17	7.64e-142	0.871502	0.869	0.572	1.82e-137	2.62e-11	4.59e-141
Radial Glia	11	RP3-395M20,12	0.0240775	0.260167	0.3	0.229	1	2.13e-13	0.468652	0.394	0.205	5.08e-09	1.14e-66	0.609569	0.459	0.138	2.72e-62	1.9e-34	0.650289	0.665	0.338	4.55e-30	2.3e-22	0.691108	0.59	0.351	5.5e-18	3.34e-139	0.772784	0.499	0.157	7.98e-135	0.0240775	2.01e-138
Radial Glia	11	CDC25B	2.26e-07	0.276346	0.229	0.098	0.00540291	2.26e-10	0.384579	0.242	0.113	5.41e-06	1.37e-71	0.594921	0.551	0.197	3.28e-67	7.77e-46	0.512221	0.444	0.142	1.85e-41	4.88e-22	0.345891	0.315	0.13	1.16e-17	4.64e-136	0.676014	0.579	0.221	1.11e-131	2.26e-07	2.78e-135
Radial Glia	11	LINC00461	0.000165371	0.432458	0.586	0.463	1	5.32e-10	0.503465	0.602	0.423	1.27e-05	4.58e-54	0.671989	0.832	0.488	1.09e-49	1.33e-34	0.715145	0.816	0.477	3.17e-30	1.39e-18	0.536845	0.637	0.428	3.32e-14	1.16e-130	0.8222	0.81	0.443	2.78e-126	0.000165371	6.97e-130
Radial Glia	11	PDLIM5	0.00368297	0.335172	0.357	0.261	1	2.63e-26	0.66241	0.496	0.225	6.28e-22	2.35e-106	0.869025	0.732	0.28	5.62e-102	2.47e-60	0.740018	0.579	0.202	5.89e-56	5.63e-12	0.299698	0.42	0.27	1.34e-07	2.92e-123	0.730014	0.669	0.319	6.97e-119	0.00368297	1.75e-122
Radial Glia	11	GNAI2	6.53e-05	0.380371	0.757	0.674	1	2.09e-10	0.463067	0.754	0.654	4.98e-06	1.84e-91	0.890218	0.99	0.881	4.39e-87	7.18e-55	0.788398	0.962	0.84	1.71e-50	2.54e-38	0.664016	0.936	0.876	6.07e-34	4.3e-118	0.636673	0.985	0.875	1.03e-113	6.53e-05	2.58e-117
Radial Glia	11	PCDH18	9.86e-10	0.454233	0.536	0.314	2.35e-05	3.12e-19	0.667866	0.559	0.31	7.45e-15	1.02e-65	0.505448	0.491	0.163	2.44e-61	1.29e-41	0.525826	0.605	0.256	3.07e-37	1.02e-16	0.385392	0.478	0.287	2.43e-12	3.3e-103	0.503998	0.456	0.164	7.89e-99	9.86e-10	1.98e-102
Radial Glia	11	RFX4	1.04e-08	0.463202	0.664	0.47	0.000248624	2.83e-32	0.854031	0.767	0.448	6.77e-28	1.3e-69	0.760447	0.924	0.522	3.1e-65	1.18e-38	0.707293	0.816	0.478	2.81e-34	5.68e-26	0.547249	0.807	0.578	1.36e-21	3.04e-98	0.626708	0.853	0.498	7.25e-94	1.04e-08	1.82e-97
Radial Glia	11	SNRPF	0.000527934	0.333639	0.829	0.774	1	1.27e-11	0.382761	0.831	0.735	3.03e-07	1.77e-51	0.491932	0.992	0.9	4.22e-47	1.94e-24	0.437474	0.97	0.874	4.62e-20	1.58e-17	0.31542	0.942	0.892	3.78e-13	5.14e-96	0.502695	0.984	0.868	1.23e-91	0.000527934	3.08e-95
Radial Glia	11	APEX1	3.67e-05	0.36318	0.764	0.654	0.87619	1.32e-06	0.312825	0.72	0.591	0.031418	3.66e-27	0.399369	0.966	0.878	8.74e-23	3.28e-16	0.391259	0.944	0.83	7.84e-12	6.05e-11	0.286502	0.898	0.813	1.44e-06	5.16e-85	0.533824	0.971	0.853	1.23e-80	3.67e-05	3.1e-84
Radial Glia	11	TTYH1	1.7e-09	0.731169	0.779	0.648	4.07e-05	5.01e-18	0.621133	0.822	0.613	1.2e-13	1.27e-75	0.916986	0.99	0.718	3.03e-71	1.68e-56	0.983335	0.962	0.721	4.02e-52	1.23e-38	0.770221	0.942	0.78	2.93e-34	7.82e-85	0.658454	0.983	0.715	1.87e-80	1.7e-09	4.69e-84
Radial Glia	11	HES4	4.04e-05	0.335786	0.786	0.721	0.965629	4.64e-16	0.628991	0.873	0.726	1.11e-11	3.18e-66	0.796996	0.974	0.802	7.59e-62	1.39e-32	0.680148	0.959	0.856	3.32e-28	9.93e-20	0.445171	0.936	0.866	2.37e-15	2.99e-66	0.47633	0.974	0.793	7.14e-62	4.04e-05	1.79e-65
Radial Glia	11	JAM2	1.82e-06	0.431063	0.5	0.324	0.0435298	3.29e-20	0.519652	0.47	0.237	7.85e-16	1.52e-50	0.508956	0.806	0.46	3.62e-46	6.51e-19	0.363422	0.673	0.409	1.55e-14	5.81e-08	0.275611	0.532	0.415	0.00138766	4.4e-66	0.469186	0.72	0.455	1.05e-61	1.82e-06	2.64e-65
Radial Glia	11	NOTCH1	0.00133724	0.301885	0.407	0.299	1	8.99e-09	0.297229	0.428	0.281	0.000214684	1.69e-43	0.396859	0.538	0.245	4.03e-39	1.55e-30	0.456261	0.519	0.234	3.69e-26	4.32e-13	0.331706	0.397	0.24	1.03e-08	6.07e-66	0.427989	0.481	0.235	1.45e-61	0.00133724	3.64e-65
Radial Glia	11	ZC3H12C	0.00173307	0.256185	0.214	0.128	1	6.27e-31	0.636873	0.373	0.124	1.5e-26	1.81e-48	0.426453	0.554	0.247	4.32e-44	2.2e-65	0.724662	0.511	0.145	5.25e-61	7.41e-39	0.445945	0.383	0.128	1.77e-34	4.67e-65	0.419325	0.483	0.237	1.11e-60	0.00173307	1.32e-64
Radial Glia	11	NIN	0.000335557	0.321183	0.4	0.275	1	8.19e-15	0.509927	0.424	0.229	1.96e-10	3.36e-17	0.266305	0.457	0.277	8.03e-13	2.35e-12	0.291472	0.515	0.322	5.6e-08	2.21e-10	0.376015	0.407	0.264	5.28e-06	7.75e-63	0.481332	0.507	0.263	1.85e-58	0.000335557	4.65e-62
Radial Glia	11	NTRK2	0.000410759	0.662612	0.471	0.369	1	1.67e-15	0.547147	0.542	0.311	3.99e-11	6.77e-56	0.671349	0.885	0.504	1.62e-51	1.89e-25	0.607642	0.759	0.468	4.51e-21	5.91e-12	0.400754	0.688	0.521	1.41e-07	1.85e-58	0.476975	0.845	0.507	4.42e-54	0.000410759	1.11e-57
Radial Glia	11	RAN	4.09e-05	0.283385	0.914	0.857	0.976384	9.73e-10	0.32834	0.924	0.839	2.32e-05	6.24e-36	0.358856	0.997	0.96	1.49e-31	3.05e-14	0.263539	0.989	0.954	7.28e-10	1.38e-14	0.273049	0.986	0.952	3.29e-10	1.07e-52	0.31809	0.998	0.949	2.55e-48	4.09e-05	6.4e-52
Radial Glia	11	ZIC2	3.15e-13	0.495174	0.493	0.24	7.53e-09	6.97e-14	0.507506	0.568	0.36	1.67e-09	7.01e-28	0.3701	0.921	0.643	1.67e-23	1.75e-13	0.295658	0.737	0.51	4.17e-09	8.1e-12	0.387647	0.766	0.599	1.93e-07	7.06e-41	0.327636	0.875	0.636	1.69e-36	8.1e-12	4.24e-40
Radial Glia	11	ZIC1	5.65e-07	0.281522	0.35	0.18	0.0134831	4.5e-19	0.438733	0.648	0.362	1.07e-14	2.15e-33	0.477522	0.709	0.413	5.14e-29	1.81e-30	0.55891	0.85	0.537	4.32e-26	1.01e-16	0.338279	0.824	0.579	2.42e-12	6.5e-32	0.355324	0.688	0.486	1.55e-27	5.65e-07	1.29e-32
Neurons	12	CNTN2	1.66e-270	2.90362	0.897	0.116	3.97e-266	6.95e-212	2.96415	0.856	0.141	1.66e-207	0	1.9397	0.955	0.154	0	0	2.16576	0.874	0.131	0	0	2.22802	0.832	0.093	0	0	1.65562	0.915	0.169	0	6.95e-212	0
Neurons	12	KLHL35	1.19e-192	1.93211	0.695	0.09	2.84e-188	1.71e-219	1.82375	0.676	0.073	4.09e-215	2.48e-242	2.12287	0.97	0.268	5.91e-238	0	2.37808	0.935	0.183	0	0	2.46473	0.933	0.141	0	0	2.10588	0.959	0.241	0	1.19e-192	0
Neurons	12	NHLH1	2.91e-158	1.53977	0.673	0.098	6.96e-154	7.4e-118	1.36487	0.586	0.098	1.77e-113	1.83e-189	1.28273	0.828	0.168	4.37e-185	0	1.76604	0.787	0.113	0	9.28e-245	1.66686	0.795	0.112	2.21e-240	2.27e-192	1.19523	0.817	0.219	5.42e-188	7.4e-118	0
Neurons	12	LHX2	1.13e-128	1.18153	0.368	0.032	2.7e-124	4.4e-54	0.9128	0.365	0.074	1.05e-49	1.85e-223	2.03766	0.917	0.226	4.42e-219	6.28e-104	0.906599	0.423	0.089	1.5e-99	2.22e-141	0.90117	0.396	0.043	5.29e-137	0	2.01026	0.915	0.224	0	4.4e-54	0
Neurons	12	GREM2	2.71e-145	1.14697	0.525	0.063	6.46e-141	2.05e-127	0.943496	0.532	0.072	4.88e-123	1.82e-221	1.19776	0.825	0.155	4.35e-217	3.28e-192	0.695403	0.447	0.055	7.82e-188	7.47e-187	0.884801	0.537	0.059	1.78e-182	9.48e-294	1.29877	0.864	0.179	2.26e-289	2.05e-127	5.69e-293
Neurons	12	ROBO3	1.19e-130	2.70607	0.641	0.117	2.83e-126	6.66e-156	2.89435	0.644	0.097	1.59e-151	3.37e-204	1.84976	0.745	0.158	8.04e-200	7.5e-253	2.0293	0.729	0.145	1.79e-248	2.69e-146	1.81741	0.668	0.144	6.43e-142	7.03e-290	1.89282	0.77	0.162	1.68e-285	1.19e-130	4.22e-289
Neurons	12	POU3F1	4.43e-05	0.287901	0.224	0.139	1	1.84e-35	0.608919	0.491	0.175	4.39e-31	5.33e-207	1.83857	0.908	0.238	1.27e-202	5.49e-177	1.31519	0.756	0.197	1.31e-172	1.39e-128	1.35443	0.642	0.139	3.32e-124	7.75e-270	1.7223	0.883	0.232	1.85e-265	4.43e-05	4.65e-269
Neurons	12	ST18	1.57e-164	1.50881	0.664	0.091	3.74e-160	1.14e-133	1.09669	0.55	0.075	2.72e-129	1.28e-58	0.497413	0.374	0.095	3.05e-54	5.95e-262	0.774844	0.495	0.048	1.42e-257	5.04e-246	0.915675	0.515	0.04	1.2e-241	1.15e-42	0.341672	0.303	0.099	2.74e-38	1.15e-42	3.57e-261
Neurons	12	RGMB	1.05e-83	1.80249	0.776	0.3	2.5e-79	6.36e-96	1.70626	0.752	0.231	1.52e-91	2.47e-210	1.56869	0.911	0.26	5.89e-206	2.97e-156	1.59607	0.795	0.303	7.08e-152	1.8e-94	1.44763	0.72	0.26	4.3e-90	3.33e-260	1.44326	0.874	0.247	7.95e-256	1.05e-83	2e-259
Neurons	12	UNCX	9.52e-80	0.841132	0.439	0.077	2.27e-75	7.64e-81	0.882818	0.378	0.056	1.82e-76	1.71e-168	1.33807	0.84	0.219	4.07e-164	1.57e-191	0.97745	0.601	0.105	3.75e-187	2.19e-159	0.855958	0.507	0.063	5.24e-155	1.48e-259	1.40479	0.851	0.205	3.54e-255	9.52e-80	8.89e-259
Neurons	12	INSM1	3.21e-55	0.933414	0.426	0.099	7.67e-51	5.71e-70	0.786802	0.41	0.075	1.36e-65	8.49e-57	0.60119	0.585	0.205	2.03e-52	3.79e-245	1.2406	0.78	0.145	9.05e-241	5.29e-199	1.27575	0.724	0.107	1.26e-194	1.68e-80	0.607645	0.623	0.222	4.02e-76	3.21e-55	2.27e-244
Neurons	12	LHX9	2.35e-139	1.77966	0.498	0.056	5.6e-135	1.78e-90	1.45506	0.64	0.143	4.25e-86	1.7e-146	1.46828	0.926	0.287	4.06e-142	1.38e-114	1.21985	0.623	0.167	3.3e-110	7.62e-117	1.5347	0.582	0.111	1.82e-112	1.95e-230	1.62554	0.957	0.3	4.65e-226	1.78e-90	1.17e-229
Neurons	12	TMEM163	4.31e-100	0.743648	0.372	0.044	1.03e-95	6.67e-76	0.775602	0.351	0.052	1.59e-71	1.32e-188	1.27617	0.816	0.185	3.16e-184	9.65e-141	0.903572	0.517	0.104	2.3e-136	4.22e-125	0.937813	0.466	0.069	1.01e-120	1.2e-225	1.2065	0.787	0.188	2.85e-221	6.67e-76	7.18e-225
Neurons	12	STMN2	7.97e-91	1.64409	0.982	0.402	1.9e-86	3.54e-97	1.9349	0.959	0.388	8.45e-93	6.19e-167	2.03704	1	0.479	1.48e-162	8.54e-208	2.04785	1	0.359	2.04e-203	3.44e-181	2.43918	0.996	0.282	8.2e-177	3.74e-225	2.01374	0.998	0.502	8.94e-221	7.97e-91	2.25e-224
Neurons	12	THSD7A	1.3e-127	1.40416	0.691	0.132	3.1e-123	5.84e-137	1.54046	0.721	0.135	1.4e-132	1.71e-182	1.59938	0.935	0.293	4.08e-178	5.87e-168	1.41174	0.831	0.278	1.4e-163	9.7e-162	1.39294	0.799	0.173	2.32e-157	2.1e-215	1.42118	0.887	0.288	5e-211	1.3e-127	1.26e-214
Neurons	12	FNDC5	5.56e-52	0.801536	0.556	0.185	1.33e-47	1.78e-44	0.710874	0.423	0.118	4.25e-40	2.9e-186	1.18364	0.866	0.232	6.91e-182	2.73e-146	0.797515	0.594	0.139	6.53e-142	2.66e-69	0.776556	0.582	0.185	6.34e-65	3.41e-213	1.10063	0.806	0.225	8.15e-209	1.78e-44	2.05e-212
Neurons	12	EPB41	4.58e-92	1.89286	0.901	0.437	1.09e-87	2.5e-94	1.96803	0.874	0.374	5.97e-90	2.25e-153	1.57431	0.958	0.523	5.37e-149	8.55e-154	1.59098	0.908	0.513	2.04e-149	1.5e-98	1.55257	0.884	0.471	3.59e-94	2.35e-210	1.65277	0.94	0.47	5.6e-206	4.58e-92	1.41e-209
Neurons	12	CDKN1C	1.29e-83	1.66283	0.96	0.593	3.07e-79	1.36e-72	1.59523	0.928	0.546	3.24e-68	3.24e-134	1.60408	0.982	0.698	7.74e-130	3.81e-163	1.65766	0.988	0.593	9.1e-159	2.03e-111	1.79403	0.955	0.544	4.85e-107	1.54e-200	1.65246	0.994	0.641	3.67e-196	1.36e-72	9.22e-200
Neurons	12	BASP1	9.43e-55	1.15775	0.951	0.732	2.25e-50	1.74e-63	1.172	0.973	0.75	4.16e-59	7.39e-143	1.62336	1	0.923	1.76e-138	4.11e-137	1.27601	1	0.917	9.82e-133	2.21e-100	1.40543	1	0.897	5.28e-96	2.95e-198	1.58891	1	0.924	7.05e-194	9.43e-55	1.77e-197
Neurons	12	SCG3	2.35e-136	1.60926	0.879	0.212	5.61e-132	3.06e-124	1.43454	0.82	0.188	7.32e-120	1e-139	1.2617	0.973	0.38	2.39e-135	2.74e-184	1.31709	0.93	0.31	6.53e-180	3.31e-141	1.4892	0.907	0.282	7.9e-137	3.14e-196	1.21305	0.951	0.336	7.5e-192	3.06e-124	1.88e-195
Neurons	12	TUBA1A	3.67e-51	1.24388	0.996	0.948	8.77e-47	3.67e-63	1.22474	0.995	0.957	8.75e-59	8.37e-142	1.19773	1	0.997	2e-137	1.96e-168	1.37867	1	0.996	4.67e-164	1.59e-122	1.51248	1	0.994	3.8e-118	9.41e-194	1.17011	1	0.997	2.25e-189	3.67e-51	5.65e-193
Neurons	12	DCX	4.13e-77	1.2988	0.924	0.398	9.87e-73	5.77e-81	1.45029	0.919	0.387	1.38e-76	1.75e-132	1.31331	0.973	0.394	4.18e-128	5.81e-169	1.44162	0.952	0.38	1.39e-164	2.14e-156	1.96651	0.993	0.347	5.12e-152	2.36e-192	1.4242	0.97	0.408	5.63e-188	4.13e-77	1.41e-191
Neurons	12	EBF3	2.92e-131	1.40357	0.704	0.133	6.96e-127	1.42e-117	1.3289	0.662	0.126	3.38e-113	5.02e-80	0.575883	0.68	0.214	1.2e-75	2.4e-192	1.09508	0.754	0.169	5.73e-188	1.79e-176	1.17945	0.672	0.104	4.28e-172	5.77e-81	0.547574	0.546	0.182	1.38e-76	5.02e-80	1.44e-191
Neurons	12	ARL4D	5.9e-55	1.37619	0.57	0.191	1.41e-50	2.93e-40	1.26395	0.527	0.21	6.98e-36	8.17e-149	1.35697	0.819	0.262	1.95e-144	8.89e-19	0.67978	0.382	0.22	2.12e-14	1.69e-43	0.9819	0.5	0.195	4.04e-39	3.2e-191	1.19399	0.791	0.241	7.65e-187	8.89e-19	1.92e-190
Neurons	12	NSG2	9.29e-30	0.653642	0.435	0.149	2.22e-25	4.34e-48	0.532625	0.473	0.123	1.04e-43	1.2e-125	1.17477	0.858	0.274	2.87e-121	6.52e-74	0.573653	0.563	0.176	1.56e-69	6.04e-61	0.46099	0.466	0.113	1.44e-56	1.4e-190	1.17919	0.857	0.255	3.33e-186	9.29e-30	8.37e-190
Neurons	12	MAP1B	2.46e-70	1.33753	0.991	0.856	5.86e-66	1.49e-65	1.27368	0.991	0.849	3.56e-61	2.9e-123	1.21104	1	0.948	6.92e-119	3.7e-149	1.40491	0.998	0.911	8.82e-145	1.38e-112	1.59379	1	0.938	3.29e-108	1.03e-184	1.25262	1	0.948	2.45e-180	1.49e-65	6.16e-184
Neurons	12	INA	1.47e-102	1.48012	0.843	0.241	3.51e-98	9.56e-121	1.44144	0.829	0.201	2.28e-116	3.04e-123	1.22611	0.982	0.387	7.25e-119	4.97e-168	1.41211	0.94	0.337	1.19e-163	1.68e-140	1.56411	0.948	0.323	4.02e-136	6.75e-182	1.28435	0.962	0.37	1.61e-177	1.47e-102	4.05e-181
Neurons	12	RTN4	2.07e-43	0.927749	0.951	0.764	4.95e-39	6.03e-45	0.9	0.964	0.758	1.44e-40	1.6e-134	1.24408	1	0.934	3.83e-130	3.12e-132	1.07862	0.993	0.909	7.44e-128	3.2e-108	1.32767	0.996	0.898	7.63e-104	2.36e-175	1.17616	0.996	0.926	5.63e-171	2.07e-43	1.42e-174
Neurons	12	ELAVL3	5.78e-75	1.41386	0.937	0.516	1.38e-70	1.55e-75	1.52596	0.95	0.512	3.7e-71	5.8e-127	1.29836	0.985	0.543	1.38e-122	8.91e-164	1.46211	0.959	0.52	2.13e-159	1.46e-110	1.51153	0.929	0.484	3.48e-106	3.82e-174	1.32691	0.983	0.557	9.13e-170	5.78e-75	2.29e-173
Neurons	12	EBF1	5.06e-116	1.00424	0.578	0.094	1.21e-111	7.67e-56	0.998104	0.491	0.127	1.83e-51	9.24e-127	1.07633	0.893	0.322	2.21e-122	4.36e-110	0.845229	0.582	0.161	1.04e-105	2.16e-132	1.17335	0.634	0.125	5.17e-128	1.61e-173	1.04604	0.849	0.294	3.85e-169	7.67e-56	9.67e-173
Neurons	12	MLLT11	2.1e-51	1.07995	0.906	0.592	5.02e-47	5.79e-50	1.04155	0.892	0.583	1.38e-45	6.33e-123	1.43767	1	0.894	1.51e-118	2.08e-153	1.49428	0.998	0.696	4.96e-149	1.96e-115	1.69003	0.989	0.613	4.69e-111	8.84e-171	1.40605	0.998	0.892	2.11e-166	5.79e-50	5.3e-170
Neurons	12	TMSB10	4.08e-36	0.822485	0.978	0.934	9.75e-32	4.56e-32	0.768371	0.955	0.925	1.09e-27	3.8e-124	1.03453	1	0.993	9.07e-120	6.27e-132	1.11185	0.998	0.988	1.5e-127	2.05e-103	1.22916	1	0.989	4.9e-99	3.13e-166	0.944504	1	0.99	7.48e-162	4.56e-32	1.88e-165
Neurons	12	TUBB2B	4.62e-44	0.852727	0.987	0.922	1.1e-39	1.63e-52	0.876646	0.986	0.916	3.89e-48	1.27e-127	1.2451	1	0.966	3.04e-123	1.41e-156	1.35406	0.998	0.959	3.36e-152	8.75e-110	1.3723	1	0.975	2.09e-105	3.59e-162	1.09966	1	0.97	8.56e-158	4.62e-44	2.15e-161
Neurons	12	GAP43	2.92e-64	1.18194	0.646	0.194	6.97e-60	6.03e-68	1.15436	0.721	0.235	1.44e-63	7.19e-65	0.834561	0.955	0.645	1.72e-60	3.14e-160	1.75936	0.935	0.384	7.49e-156	4.2e-139	2.09329	0.963	0.375	1e-134	5.45e-56	0.610805	0.925	0.676	1.3e-51	5.45e-56	1.88e-159
Neurons	12	GPC2	1.16e-53	1.00572	0.803	0.399	2.78e-49	2.71e-43	0.807728	0.739	0.365	6.47e-39	3.09e-115	1.17226	0.982	0.575	7.37e-111	2.46e-121	1.04362	0.87	0.423	5.86e-117	1.72e-75	1.05109	0.799	0.365	4.1e-71	1.02e-159	1.18268	0.977	0.594	2.43e-155	2.71e-43	6.1e-159
Neurons	12	SOX11	2.08e-65	1.24984	0.996	0.783	4.98e-61	7.43e-53	1.16513	0.964	0.76	1.77e-48	1.18e-123	1.49705	1	0.844	2.81e-119	6.33e-130	1.32028	0.976	0.787	1.51e-125	4.23e-89	1.34776	0.97	0.743	1.01e-84	2.82e-155	1.26	1	0.847	6.74e-151	7.43e-53	1.69e-154
Neurons	12	NCAM1	1.25e-70	1.27969	0.906	0.449	2.99e-66	1.54e-52	1.13298	0.833	0.426	3.67e-48	8.62e-113	1.2173	0.988	0.586	2.06e-108	3.69e-121	1.16652	0.894	0.433	8.81e-117	2.22e-105	1.30796	0.888	0.351	5.3e-101	8.04e-154	1.24437	0.983	0.539	1.92e-149	1.54e-52	4.82e-153
Neurons	12	STMN4	9.96e-26	0.649235	0.713	0.383	2.38e-21	2.67e-26	0.667711	0.703	0.374	6.37e-22	4.95e-108	1.1572	0.973	0.441	1.18e-103	1.16e-152	1.35855	0.923	0.351	2.77e-148	2.53e-135	1.77125	0.922	0.308	6.04e-131	1.43e-127	1.05215	0.938	0.423	3.42e-123	9.96e-26	6.96e-152
Neurons	12	BICD1	6.62e-31	0.9173	0.574	0.277	1.58e-26	2.88e-34	0.863119	0.536	0.22	6.88e-30	5.71e-109	0.992572	0.855	0.375	1.36e-104	2.81e-56	0.718329	0.589	0.286	6.7e-52	1.41e-66	0.938445	0.631	0.231	3.36e-62	1.14e-150	1.01606	0.823	0.338	2.73e-146	6.62e-31	6.86e-150
Neurons	12	DPYSL3	7.52e-57	1.11296	0.848	0.43	1.79e-52	5.45e-68	1.18019	0.86	0.368	1.3e-63	6.88e-106	1.0676	0.95	0.515	1.64e-101	1.33e-131	1.23058	0.901	0.436	3.18e-127	1.33e-94	1.26187	0.888	0.427	3.18e-90	2.28e-150	1.11305	0.947	0.496	5.44e-146	7.52e-57	1.37e-149
Neurons	12	CRABP1	1.11e-71	2.07737	0.955	0.615	2.64e-67	2.9e-59	1.6399	0.959	0.739	6.93e-55	1.27e-87	1.41666	0.973	0.67	3.03e-83	4.94e-131	2.12728	0.988	0.821	1.18e-126	5.34e-96	2.15608	0.97	0.793	1.28e-91	3.05e-149	1.63038	0.994	0.688	7.28e-145	2.9e-59	1.83e-148
Neurons	12	SLC17A6	1.66e-137	1.28338	0.435	0.043	3.97e-133	1.54e-117	1.02646	0.419	0.048	3.68e-113	5.8e-90	0.693845	0.576	0.15	1.38e-85	8.97e-82	0.720449	0.411	0.101	2.14e-77	8.89e-149	1.08607	0.437	0.05	2.12e-144	3.46e-110	0.690652	0.488	0.123	8.25e-106	8.97e-82	5.33e-148
Neurons	12	C1QL1	4.59e-98	0.919202	0.35	0.04	1.1e-93	1.26e-116	1.18486	0.45	0.059	3.01e-112	1.4e-73	0.57576	0.371	0.081	3.35e-69	2.65e-123	1.02869	0.435	0.085	6.33e-119	8.97e-69	0.862855	0.362	0.072	2.14e-64	9.55e-149	0.793223	0.475	0.097	2.28e-144	8.97e-69	5.73e-148
Neurons	12	NKAIN4	4.82e-30	0.773186	0.717	0.432	1.15e-25	2.63e-09	0.418713	0.532	0.369	6.29e-05	2.92e-117	1.2346	0.976	0.688	6.97e-113	4.64e-74	0.987364	0.867	0.615	1.11e-69	1.86e-38	0.822195	0.843	0.609	4.43e-34	6.26e-148	1.16369	0.977	0.695	1.5e-143	2.63e-09	3.76e-147
Neurons	12	POU4F1	4.21e-79	1.11418	0.368	0.053	1e-74	1.33e-39	1.10323	0.275	0.057	3.17e-35	2.01e-147	0.937159	0.588	0.108	4.8e-143	7.37e-47	0.466119	0.246	0.061	1.76e-42	1.73e-114	0.753374	0.347	0.04	4.13e-110	2.35e-145	0.635947	0.429	0.076	5.61e-141	1.33e-39	1.21e-146
Neurons	12	PTPRG	4.14e-66	0.930251	0.578	0.16	9.88e-62	8.17e-64	1.01956	0.568	0.164	1.95e-59	2.7e-77	0.716277	0.605	0.214	6.45e-73	5.03e-147	1.03638	0.662	0.184	1.2e-142	4.44e-67	0.822385	0.56	0.177	1.06e-62	3.19e-132	0.829754	0.629	0.194	7.62e-128	8.17e-64	3.02e-146
Neurons	12	TAGLN3	4.12e-59	1.32863	0.857	0.468	9.82e-55	2.36e-34	0.842265	0.784	0.466	5.63e-30	4.17e-96	1.01246	0.994	0.741	9.95e-92	1.19e-146	1.47035	0.99	0.643	2.83e-142	4.96e-108	1.60081	0.985	0.624	1.18e-103	4.33e-98	0.751375	0.989	0.745	1.03e-93	2.36e-34	7.12e-146
Neurons	12	GNG3	1.96e-60	1.00594	0.735	0.271	4.67e-56	4.82e-60	0.986453	0.725	0.267	1.15e-55	3.34e-98	0.980314	0.944	0.431	7.96e-94	7.91e-142	1.24018	0.865	0.323	1.89e-137	1.1e-143	1.58166	0.892	0.257	2.63e-139	3.59e-146	0.979602	0.932	0.378	8.57e-142	4.82e-60	2.15e-145
Neurons	12	NEFM	1.26e-47	1.49081	0.659	0.254	3e-43	3.41e-60	1.36358	0.73	0.267	8.14e-56	3.18e-60	1.06581	0.697	0.33	7.58e-56	1.91e-141	1.84632	0.816	0.287	4.56e-137	6.24e-124	1.79411	0.84	0.258	1.49e-119	3.14e-72	0.556697	0.701	0.327	7.49e-68	1.26e-47	1.15e-140
Neurons	12	RTN1	5.82e-27	0.562444	0.516	0.211	1.39e-22	1.87e-51	0.845783	0.694	0.256	4.46e-47	4.22e-91	1.18018	0.97	0.597	1.01e-86	1.37e-100	0.897705	0.877	0.385	3.26e-96	2.94e-102	1.40209	0.873	0.327	7.01e-98	3.14e-140	1.26067	0.977	0.587	7.49e-136	5.82e-27	1.88e-139
Neurons	12	CRMP1	9.35e-58	1.02138	0.888	0.526	2.23e-53	2.59e-52	1.05968	0.856	0.478	6.18e-48	3.06e-104	1.11721	0.991	0.658	7.3e-100	9.57e-106	1.01483	0.947	0.681	2.29e-101	3.15e-84	1.2154	0.944	0.624	7.52e-80	4.32e-140	1.1008	0.985	0.675	1.03e-135	2.59e-52	2.59e-139
Neurons	12	SRRM4	8.17e-72	0.938393	0.619	0.163	1.95e-67	2.47e-58	0.822489	0.577	0.163	5.9e-54	2.67e-84	0.661514	0.763	0.265	6.36e-80	8.34e-140	0.928547	0.727	0.209	1.99e-135	1.06e-127	1.10046	0.69	0.153	2.53e-123	6.73e-84	0.623917	0.738	0.301	1.61e-79	2.47e-58	5e-139
Neurons	12	STMN1	2.77e-61	1.13412	0.991	0.824	6.61e-57	3.41e-53	1.02523	0.973	0.863	8.15e-49	9.57e-97	0.985119	1	0.985	2.28e-92	3.85e-130	1.03913	1	0.977	9.19e-126	1.53e-101	1.27821	1	0.97	3.66e-97	1.07e-139	0.981448	1	0.983	2.56e-135	3.41e-53	6.42e-139
Neurons	12	MAP2	6.46e-80	1.56731	0.978	0.683	1.54e-75	3.85e-66	1.3257	0.973	0.685	9.2e-62	6.78e-86	0.962149	0.994	0.818	1.62e-81	1.25e-125	1.29175	0.973	0.761	2.98e-121	1.12e-97	1.52301	0.974	0.679	2.66e-93	3.48e-138	1.21002	0.983	0.731	8.3e-134	3.85e-66	2.09e-137
Neurons	12	NEUROD4	1.5e-57	0.960084	0.43	0.097	3.58e-53	1.22e-45	0.762951	0.405	0.102	2.92e-41	2.26e-45	0.46519	0.318	0.085	5.41e-41	1.74e-137	1.03092	0.459	0.083	4.15e-133	8.3e-128	1.25489	0.571	0.101	1.98e-123	1.19e-76	0.514241	0.431	0.123	2.84e-72	2.26e-45	1.04e-136
Neurons	12	FAM57B	1.76e-59	0.925047	0.65	0.213	4.21e-55	4.92e-64	0.999626	0.64	0.201	1.18e-59	3.45e-98	0.79842	0.81	0.289	8.25e-94	2.5e-125	0.876187	0.71	0.218	5.97e-121	1.64e-115	1.12062	0.709	0.18	3.92e-111	5.93e-137	0.853716	0.814	0.289	1.42e-132	1.76e-59	3.56e-136
Neurons	12	SOX4	1.13e-43	0.973512	0.991	0.88	2.69e-39	8.54e-55	1.1121	0.986	0.871	2.04e-50	2.14e-110	1.35958	1	0.952	5.11e-106	9.07e-102	1.10318	0.993	0.919	2.17e-97	3.24e-87	1.26082	1	0.883	7.75e-83	9.94e-137	1.19459	1	0.947	2.37e-132	1.13e-43	5.96e-136
Neurons	12	ELAVL2	5.1e-55	1.0047	0.695	0.262	1.22e-50	2.59e-79	1.12015	0.752	0.238	6.18e-75	8.51e-86	0.772199	0.831	0.345	2.03e-81	2.54e-136	1.24728	0.816	0.338	6.07e-132	9.34e-101	1.31767	0.787	0.289	2.23e-96	2.35e-105	0.774954	0.763	0.32	5.61e-101	5.1e-55	1.53e-135
Neurons	12	NSG1	2.17e-10	0.453054	0.444	0.274	5.18e-06	6.44e-21	0.512657	0.514	0.252	1.54e-16	9.23e-86	0.948744	0.917	0.467	2.2e-81	2.05e-73	0.776536	0.734	0.329	4.89e-69	4.33e-68	0.909849	0.672	0.237	1.03e-63	5.05e-136	1.04042	0.921	0.428	1.21e-131	2.17e-10	3.03e-135
Neurons	12	ANK2	3.77e-34	0.846132	0.592	0.261	9.01e-30	7.45e-33	0.884537	0.644	0.306	1.78e-28	8.05e-83	0.998155	0.834	0.469	1.92e-78	1.82e-68	1.11886	0.739	0.441	4.34e-64	3.65e-87	1.3892	0.791	0.332	8.71e-83	3.85e-131	1.09593	0.844	0.419	9.2e-127	7.45e-33	2.31e-130
Neurons	12	TERF2IP	2.77e-32	0.71297	0.91	0.733	6.62e-28	1.35e-29	0.657667	0.91	0.699	3.22e-25	6.14e-78	0.808589	0.985	0.884	1.46e-73	4.12e-109	0.964526	0.981	0.808	9.84e-105	1.52e-79	1.11262	0.97	0.76	3.64e-75	2.37e-130	0.954514	0.994	0.83	5.65e-126	1.35e-29	1.42e-129
Neurons	12	DCC	7.58e-77	1.24436	0.632	0.18	1.81e-72	2.55e-63	1.1535	0.613	0.189	6.08e-59	2.69e-44	0.472956	0.579	0.252	6.43e-40	1.8e-129	1.00097	0.643	0.19	4.29e-125	9.6e-93	0.855069	0.653	0.181	2.29e-88	7.75e-32	0.352629	0.484	0.252	1.85e-27	7.75e-32	1.08e-128
Neurons	12	CBLB	2e-49	1.14378	0.561	0.2	4.78e-45	2.94e-40	0.900568	0.527	0.196	7.01e-36	1.22e-79	0.836473	0.715	0.308	2.91e-75	8.88e-62	0.758396	0.551	0.238	2.12e-57	1.6e-44	0.75032	0.545	0.224	3.82e-40	2.98e-129	0.887693	0.751	0.29	7.11e-125	2.94e-40	1.79e-128
Neurons	12	RND3	5.36e-24	1.02706	0.776	0.533	1.28e-19	2.67e-11	0.680238	0.779	0.607	6.37e-07	2.63e-104	1.19409	0.982	0.776	6.27e-100	9.5e-40	0.797169	0.756	0.535	2.27e-35	8.02e-19	0.613108	0.687	0.505	1.91e-14	1.86e-128	1.11074	0.977	0.751	4.44e-124	2.67e-11	1.12e-127
Neurons	12	PCBP4	1.42e-56	1.05734	0.816	0.422	3.39e-52	4.8e-61	1.09502	0.77	0.325	1.15e-56	2.89e-93	1.01218	0.964	0.584	6.91e-89	1.38e-127	1.14569	0.911	0.476	3.3e-123	1.29e-85	1.19009	0.873	0.436	3.09e-81	1.3e-100	0.819189	0.957	0.592	3.11e-96	1.42e-56	8.3e-127
Neurons	12	ZC2HC1A	3.78e-41	0.903289	0.722	0.364	9.03e-37	1.03e-30	0.696625	0.635	0.312	2.47e-26	1.16e-79	0.875448	0.896	0.586	2.77e-75	4.19e-98	0.92236	0.896	0.543	1e-93	4.29e-57	0.90134	0.843	0.521	1.02e-52	3.8e-127	0.960974	0.923	0.543	9.06e-123	1.03e-30	2.28e-126
Neurons	12	KLF7	7.55e-40	0.720974	0.404	0.117	1.8e-35	2.52e-44	0.775501	0.518	0.173	6.02e-40	1.43e-96	0.726934	0.718	0.248	3.42e-92	2.77e-126	0.880468	0.647	0.19	6.6e-122	1.09e-99	0.791455	0.586	0.138	2.6e-95	4.24e-103	0.704064	0.644	0.242	1.01e-98	7.55e-40	1.66e-125
Neurons	12	POU2F2	1.94e-44	1.19639	0.61	0.226	4.63e-40	2.5e-52	1.0964	0.64	0.211	5.97e-48	1.23e-66	0.636791	0.718	0.272	2.93e-62	4.34e-63	0.63065	0.514	0.182	1.04e-58	2.3e-46	0.744293	0.53	0.194	5.48e-42	1.81e-125	0.962457	0.812	0.3	4.32e-121	1.94e-44	1.09e-124
Neurons	12	IGFBPL1	1.4e-47	0.850898	0.574	0.199	3.34e-43	7.27e-52	0.849176	0.725	0.284	1.74e-47	1.41e-109	0.978371	0.911	0.367	3.37e-105	2.3e-121	1.03298	0.771	0.284	5.5e-117	7.44e-85	0.944516	0.799	0.304	1.78e-80	2.44e-120	0.829009	0.902	0.395	5.82e-116	1.4e-47	1.38e-120
Neurons	12	NFASC	2.8e-92	1.09067	0.659	0.159	6.68e-88	9.53e-57	0.985515	0.59	0.184	2.27e-52	1.12e-89	0.734092	0.697	0.247	2.66e-85	1.34e-92	0.633857	0.536	0.159	3.21e-88	2.49e-74	0.652642	0.522	0.135	5.94e-70	2.07e-120	0.773974	0.697	0.255	4.94e-116	9.53e-57	1.24e-119
Neurons	12	GDAP1L1	3.85e-40	0.760066	0.731	0.343	9.18e-36	5.24e-45	0.825223	0.734	0.324	1.25e-40	8.14e-92	0.838933	0.899	0.404	1.94e-87	6.1e-92	0.847592	0.802	0.389	1.46e-87	1.36e-46	0.700737	0.757	0.41	3.24e-42	2.92e-117	0.856181	0.829	0.356	6.97e-113	3.85e-40	1.75e-116
Neurons	12	CAMK2N1	7.52e-64	1.29113	0.91	0.5	1.79e-59	4.69e-75	1.46848	0.874	0.402	1.12e-70	1.27e-70	0.927414	0.908	0.59	3.03e-66	1.11e-115	1.48452	0.879	0.494	2.65e-111	4.17e-109	1.9948	0.91	0.464	9.96e-105	1.6e-98	0.881316	0.915	0.568	3.82e-94	7.52e-64	6.65e-115
Neurons	12	PBX3	2.02e-27	0.686365	0.717	0.424	4.82e-23	2.79e-35	0.769011	0.703	0.366	6.66e-31	9.55e-91	0.962965	0.872	0.458	2.28e-86	1.9e-64	0.846341	0.717	0.398	4.53e-60	1.8e-47	0.844201	0.716	0.402	4.29e-43	1.6e-115	0.983481	0.814	0.402	3.83e-111	2.02e-27	9.62e-115
Neurons	12	TUBB2A	1.97e-21	0.601202	0.843	0.62	4.71e-17	4.64e-41	0.921717	0.887	0.594	1.11e-36	4.02e-81	0.91054	0.994	0.892	9.59e-77	6.46e-109	1.12025	0.981	0.782	1.54e-104	3.09e-91	1.35867	0.989	0.785	7.38e-87	6.85e-111	0.893798	0.987	0.888	1.63e-106	1.97e-21	4.11e-110
Neurons	12	DYNC1I2	1.89e-29	0.687461	0.906	0.744	4.51e-25	3.33e-37	0.775961	0.937	0.702	7.96e-33	6.43e-78	0.776808	0.985	0.893	1.54e-73	3.69e-97	0.922915	0.961	0.854	8.81e-93	2.43e-67	0.943351	0.951	0.773	5.81e-63	5.35e-110	0.754167	0.994	0.901	1.28e-105	1.89e-29	3.21e-109
Neurons	12	RBFOX2	1.64e-43	0.900541	0.794	0.414	3.9e-39	6.7e-44	0.939437	0.797	0.401	1.6e-39	3.31e-75	0.817056	0.961	0.65	7.89e-71	1.71e-79	0.859012	0.855	0.546	4.09e-75	2.47e-70	0.952993	0.877	0.479	5.89e-66	2.23e-108	0.816941	0.955	0.603	5.33e-104	1.64e-43	1.34e-107
Neurons	12	TMSB4X	4.13e-14	0.584475	0.96	0.92	9.87e-10	2.07e-11	0.443943	0.986	0.927	4.93e-07	1.77e-61	0.599011	1	0.982	4.23e-57	8.32e-108	1.16738	1	0.983	1.99e-103	1.25e-81	1.36171	1	0.99	2.99e-77	8.08e-73	0.513563	0.998	0.976	1.93e-68	2.07e-11	4.99e-107
Neurons	12	OLFM1	1.27e-65	1.15095	0.637	0.197	3.03e-61	3.15e-51	0.9369	0.595	0.202	7.52e-47	5.64e-71	0.738622	0.792	0.356	1.35e-66	1.81e-102	1.02024	0.773	0.324	4.33e-98	5.32e-107	1.2821	0.787	0.268	1.27e-102	2.27e-83	0.620287	0.712	0.313	5.41e-79	3.15e-51	3.19e-106
Neurons	12	KIF5C	3.19e-32	0.758518	0.812	0.506	7.62e-28	2.27e-28	0.703626	0.761	0.451	5.43e-24	2.45e-58	0.62878	0.979	0.77	5.84e-54	3.95e-106	1.09396	0.93	0.563	9.44e-102	6.06e-75	1.24479	0.877	0.52	1.45e-70	7.45e-78	0.64882	0.953	0.702	1.78e-73	2.27e-28	2.37e-105
Neurons	12	DYNC1LI1	1.14e-13	0.515914	0.628	0.453	2.72e-09	6.94e-22	0.72798	0.671	0.426	1.66e-17	3.6e-78	0.824593	0.92	0.677	8.6e-74	5.38e-71	0.818249	0.882	0.657	1.29e-66	3.28e-58	0.862118	0.869	0.593	7.82e-54	1.1e-104	0.886379	0.928	0.649	2.62e-100	1.14e-13	6.59e-104
Neurons	12	SEZ6L2	5.09e-75	1.18978	0.816	0.288	1.21e-70	5.2e-83	1.17719	0.847	0.289	1.24e-78	3e-61	0.659128	0.905	0.481	7.15e-57	1.54e-68	0.740832	0.836	0.483	3.68e-64	8.34e-68	0.9254	0.851	0.447	1.99e-63	3.98e-104	0.818982	0.932	0.466	9.5e-100	3e-61	2.39e-103
Neurons	12	KLC1	9.46e-37	0.800347	0.771	0.427	2.26e-32	2.87e-50	0.98718	0.806	0.405	6.86e-46	2.4e-63	0.715222	0.896	0.619	5.72e-59	1.68e-103	0.979884	0.867	0.496	4.02e-99	5.81e-90	1.11288	0.877	0.428	1.39e-85	1.43e-88	0.758715	0.887	0.605	3.41e-84	9.46e-37	1.01e-102
Neurons	12	DNER	1.86e-26	0.834644	0.457	0.188	4.44e-22	1.78e-27	0.72439	0.541	0.237	4.25e-23	7.41e-76	0.943461	0.926	0.6	1.77e-71	1.87e-53	0.737598	0.551	0.23	4.47e-49	1.26e-35	0.650587	0.515	0.207	3.01e-31	5.99e-103	0.923003	0.934	0.635	1.43e-98	1.86e-26	3.59e-102
Neurons	12	RUFY3	1.44e-33	0.722219	0.78	0.453	3.43e-29	4.55e-26	0.660181	0.739	0.458	1.09e-21	2.84e-73	0.81999	0.938	0.733	6.77e-69	4.25e-77	0.820481	0.855	0.553	1.01e-72	4.27e-59	0.897403	0.847	0.53	1.02e-54	3.7e-102	0.841909	0.942	0.702	8.82e-98	4.55e-26	2.22e-101
Neurons	12	FNBP1L	2.17e-54	1.06356	0.892	0.55	5.18e-50	4.03e-43	1.01679	0.865	0.574	9.63e-39	2.97e-75	0.759542	0.982	0.802	7.1e-71	7.7e-95	0.993723	0.932	0.722	1.84e-90	3.2e-69	1.11244	0.907	0.619	7.65e-65	1.39e-101	0.843705	0.953	0.732	3.32e-97	4.03e-43	8.33e-101
Neurons	12	MAP6	1.82e-30	0.818709	0.821	0.555	4.33e-26	3.71e-51	1.13501	0.905	0.549	8.86e-47	2.95e-76	0.829108	0.953	0.751	7.05e-72	1.99e-99	1.0439	0.92	0.667	4.74e-95	2.89e-81	1.19919	0.937	0.679	6.89e-77	3.27e-101	0.829631	0.955	0.747	7.8e-97	1.82e-30	1.96e-100
Neurons	12	MAP4K4	5.93e-51	1.13466	0.852	0.531	1.42e-46	9.78e-42	0.99912	0.829	0.49	2.33e-37	1.52e-93	1.02038	0.917	0.616	3.62e-89	3.65e-67	0.760731	0.829	0.561	8.72e-63	1.81e-39	0.751089	0.754	0.487	4.32e-35	1.86e-99	0.882668	0.887	0.581	4.43e-95	1.81e-39	1.11e-98
Neurons	12	SYT1	8.38e-36	0.736803	0.686	0.328	2e-31	3.75e-38	0.77082	0.838	0.445	8.95e-34	3.33e-76	0.881063	0.964	0.617	7.95e-72	1.47e-92	0.910841	0.913	0.52	3.5e-88	2.11e-82	1.1426	0.892	0.454	5.05e-78	4.49e-98	0.822754	0.97	0.665	1.07e-93	8.38e-36	2.69e-97
Neurons	12	MIAT	6.97e-39	1.28361	0.87	0.559	1.66e-34	3.26e-31	1.14527	0.802	0.494	7.78e-27	2.55e-79	0.81186	0.908	0.429	6.08e-75	2.02e-73	0.756882	0.72	0.351	4.83e-69	3.76e-59	0.923932	0.757	0.361	8.98e-55	3.46e-93	0.70523	0.872	0.437	8.25e-89	3.26e-31	2.07e-92
Neurons	12	MEIS2	2.12e-21	0.728753	0.641	0.349	5.06e-17	3.28e-15	0.493809	0.721	0.443	7.82e-11	1.06e-41	0.672762	0.751	0.367	2.53e-37	5.31e-50	1.06278	0.848	0.691	1.27e-45	2.95e-13	0.717879	0.593	0.444	7.03e-09	5.8e-92	0.883496	0.719	0.276	1.38e-87	2.95e-13	3.48e-91
Neurons	12	NRN1	3.71e-64	1.04282	0.399	0.075	8.85e-60	2.83e-20	0.489609	0.351	0.132	6.76e-16	4.62e-91	0.708158	0.659	0.185	1.1e-86	2.79e-87	0.98825	0.589	0.189	6.65e-83	1.64e-89	1.14144	0.549	0.126	3.91e-85	1.28e-51	0.4153	0.493	0.19	3.05e-47	2.83e-20	2.77e-90
Neurons	12	DPYSL2	5.09e-32	0.796188	0.937	0.778	1.22e-27	4.68e-47	1.00155	0.941	0.73	1.12e-42	1.17e-50	0.589275	0.979	0.878	2.8e-46	8.02e-86	0.915058	0.959	0.799	1.91e-81	1.52e-48	0.927268	0.892	0.692	3.62e-44	2.42e-89	0.692504	0.991	0.891	5.77e-85	5.09e-32	1.45e-88
Neurons	12	CEP170	9.59e-48	0.903927	0.857	0.498	2.29e-43	1.25e-40	0.949858	0.824	0.499	2.99e-36	6.98e-75	0.828688	0.929	0.668	1.67e-70	1.49e-88	0.928302	0.889	0.596	3.55e-84	2.18e-63	0.887137	0.862	0.506	5.2e-59	6.45e-81	0.713452	0.906	0.638	1.54e-76	1.25e-40	8.92e-88
Neurons	12	GDI1	2.08e-26	0.649621	0.767	0.522	4.96e-22	2.43e-22	0.693584	0.725	0.485	5.8e-18	2.79e-76	0.765158	0.947	0.751	6.66e-72	6.4e-88	0.831728	0.857	0.543	1.53e-83	9.75e-59	0.888095	0.817	0.497	2.33e-54	4.31e-79	0.701342	0.938	0.744	1.03e-74	2.43e-22	3.84e-87
Neurons	12	SRGAP3	2.16e-33	0.878133	0.955	0.764	5.17e-29	1.5e-30	0.815177	0.928	0.725	3.58e-26	2.25e-81	0.865708	0.967	0.777	5.36e-77	1.28e-73	0.954123	0.911	0.695	3.06e-69	4.85e-44	0.841705	0.869	0.647	1.16e-39	7.22e-77	0.708408	0.91	0.713	1.72e-72	1.5e-30	1.35e-80
Neurons	12	ARHGAP21	1.47e-27	0.878003	0.803	0.562	3.51e-23	3.91e-24	0.738754	0.811	0.566	9.34e-20	1.01e-66	0.726668	0.884	0.573	2.42e-62	4.15e-52	0.713353	0.826	0.615	9.9e-48	3.86e-37	0.762825	0.784	0.556	9.22e-33	1.2e-80	0.754667	0.836	0.526	2.86e-76	3.91e-24	7.18e-80
Neurons	12	KCNQ1OT1	6.34e-45	1.28914	0.937	0.718	1.51e-40	1.12e-45	1.29337	0.959	0.718	2.68e-41	3.62e-50	0.849656	0.953	0.778	8.63e-46	8.29e-55	0.809619	0.923	0.731	1.98e-50	4.43e-43	1.02292	0.884	0.692	1.06e-38	4e-80	0.946311	0.951	0.735	9.56e-76	4.43e-43	2.4e-79
Neurons	12	MAP3K13	7.28e-31	0.862473	0.7	0.423	1.74e-26	6.54e-35	0.93058	0.685	0.376	1.56e-30	6.05e-49	0.623721	0.798	0.539	1.44e-44	7.82e-75	0.788418	0.657	0.297	1.87e-70	2.25e-35	0.726296	0.638	0.357	5.37e-31	1.76e-64	0.657673	0.731	0.434	4.19e-60	7.28e-31	4.69e-74
Neurons	12	DYNC1H1	1.02e-29	0.817048	0.789	0.547	2.44e-25	7.09e-27	0.671301	0.784	0.507	1.69e-22	6.97e-67	0.793804	0.953	0.743	1.66e-62	1.01e-68	0.768736	0.901	0.676	2.42e-64	6.39e-44	0.887361	0.821	0.585	1.53e-39	4.02e-72	0.754985	0.876	0.652	9.59e-68	7.09e-27	2.41e-71
Neurons	12	MRPS6	5.24e-34	1.13743	0.691	0.423	1.25e-29	8.47e-39	1.28154	0.707	0.405	2.02e-34	1.73e-46	0.721529	0.923	0.808	4.12e-42	1.23e-44	1.02056	0.814	0.676	2.94e-40	1.92e-18	0.791607	0.802	0.699	4.59e-14	2.34e-63	0.705276	0.902	0.759	5.6e-59	1.92e-18	1.41e-62
Radial Glia	13	GDF15	2.21e-84	1.37749	0.593	0.202	5.27e-80	6.09e-49	1.27612	0.59	0.238	1.45e-44	2.11e-138	1.28838	0.455	0.045	5.04e-134	3.94e-94	1.32049	0.445	0.081	9.4e-90	2e-172	2.4491	0.792	0.225	4.76e-168	1.83e-226	1.55761	0.463	0.046	4.38e-222	6.09e-49	1.1e-225
Radial Glia	13	DDIT3	2.6e-39	0.651179	0.459	0.198	6.2e-35	3.79e-30	0.596998	0.414	0.161	9.06e-26	1.09e-130	1.35354	0.675	0.119	2.6e-126	2.57e-71	1.06396	0.575	0.174	6.15e-67	9.39e-159	1.71617	0.769	0.219	2.24e-154	2.44e-214	1.34267	0.647	0.109	5.83e-210	3.79e-30	1.47e-213
Radial Glia	13	CEBPB	1.22e-15	0.358166	0.315	0.166	2.91e-11	2.92e-08	0.351294	0.286	0.162	0.00069826	5.64e-98	0.841822	0.525	0.088	1.35e-93	6.95e-80	0.889911	0.575	0.158	1.66e-75	6.16e-87	0.904321	0.596	0.19	1.47e-82	1.13e-182	0.844609	0.51	0.072	2.7e-178	2.92e-08	6.79e-182
Radial Glia	13	DDIT4	2.09e-44	1.15448	0.849	0.622	5e-40	5.46e-30	1.0243	0.857	0.63	1.3e-25	6.66e-100	2.42406	0.955	0.488	1.59e-95	5.42e-116	2.23337	0.965	0.595	1.29e-111	5.63e-134	1.89248	0.968	0.69	1.34e-129	3.96e-153	2.38505	0.95	0.54	9.46e-149	5.46e-30	2.38e-152
Radial Glia	13	P4HA1	7.07e-109	1.61541	0.916	0.587	1.69e-104	1.39e-41	1.00145	0.89	0.613	3.32e-37	3.36e-90	2.09131	0.935	0.504	8.01e-86	2.18e-59	1.25607	0.795	0.424	5.21e-55	1.58e-36	0.756311	0.646	0.388	3.77e-32	1.96e-146	2.19723	0.914	0.474	4.68e-142	1.58e-36	1.18e-145
Radial Glia	13	ALDOA	7.51e-47	0.821194	0.955	0.814	1.79e-42	3.78e-26	0.827059	0.905	0.765	9.02e-22	2.75e-76	1.79278	0.98	0.893	6.55e-72	2.62e-50	1.25317	0.953	0.824	6.24e-46	6.7e-48	1.03337	0.944	0.837	1.6e-43	8.61e-120	1.8789	0.985	0.886	2.05e-115	3.78e-26	5.16e-119
Radial Glia	13	SLC2A1	7.07e-42	0.894014	0.63	0.333	1.69e-37	4.72e-22	0.500954	0.487	0.24	1.13e-17	1.43e-67	1.18912	0.77	0.286	3.42e-63	5.33e-28	0.63398	0.685	0.407	1.27e-23	1.83e-08	0.25455	0.67	0.534	0.00043715	6.47e-116	1.4476	0.786	0.312	1.54e-111	1.83e-08	3.88e-115
Radial Glia	13	ASNS	7.74e-09	0.262205	0.32	0.204	0.000184714	0.000122443	0.288088	0.256	0.172	1	2.04e-64	1.4521	0.705	0.271	4.88e-60	4.13e-35	0.939915	0.65	0.36	9.85e-31	1.96e-33	0.737609	0.617	0.372	4.67e-29	1.86e-113	1.44637	0.7	0.249	4.43e-109	0.000122443	1.11e-112
Radial Glia	13	FAM162A	4.51e-19	0.532317	0.635	0.444	1.08e-14	1.47e-16	0.484381	0.641	0.419	3.51e-12	2.56e-70	1.74015	0.93	0.623	6.1e-66	3.86e-24	0.816633	0.764	0.58	9.23e-20	8.25e-17	0.558281	0.751	0.61	1.97e-12	6.51e-113	1.68884	0.917	0.603	1.55e-108	1.47e-16	3.91e-112
Radial Glia	13	EIF1	6.68e-83	0.771346	0.993	0.943	1.59e-78	2e-41	0.625479	0.993	0.951	4.77e-37	1.87e-75	1.09107	0.99	0.98	4.45e-71	5.4e-35	0.688414	1	0.984	1.29e-30	8.18e-99	1.09259	1	0.986	1.95e-94	1e-111	1.22872	0.997	0.977	2.39e-107	5.4e-35	6e-111
Radial Glia	13	VEGFA	3.5e-49	1.08916	0.747	0.448	8.36e-45	6.81e-21	0.614188	0.663	0.413	1.63e-16	1.78e-75	0.984997	0.64	0.166	4.26e-71	1.22e-45	0.605149	0.563	0.216	2.92e-41	3.63e-33	0.501549	0.462	0.214	8.67e-29	2.72e-111	1.11079	0.638	0.185	6.5e-107	6.81e-21	1.63e-110
Radial Glia	13	BNIP3	1.3e-25	0.715484	0.764	0.54	3.11e-21	1.22e-11	0.531538	0.667	0.497	2.91e-07	6.97e-66	1.53303	0.865	0.445	1.66e-61	2.68e-39	1.12038	0.732	0.439	6.39e-35	5.04e-38	0.89392	0.67	0.407	1.2e-33	8.46e-102	1.50723	0.872	0.454	2.02e-97	1.22e-11	5.08e-101
Radial Glia	13	FTL	2.52e-24	0.506041	0.988	0.948	6.01e-20	1.31e-13	0.348805	0.996	0.956	3.12e-09	1.46e-61	1.46456	1	0.98	3.48e-57	1.32e-38	0.951117	1	0.988	3.14e-34	1.1e-95	1.64647	1	0.985	2.62e-91	4.5e-100	1.48572	0.997	0.974	1.07e-95	1.31e-13	2.7e-99
Radial Glia	13	CDKN1A	1.34e-57	1.31499	0.653	0.309	3.2e-53	6.85e-20	0.981728	0.571	0.335	1.64e-15	2.49e-67	0.82832	0.455	0.087	5.94e-63	1.76e-23	0.750772	0.406	0.178	4.2e-19	1.16e-36	0.628908	0.477	0.21	2.77e-32	2.01e-95	0.973409	0.439	0.095	4.81e-91	6.85e-20	1.21e-94
Radial Glia	13	ENO1	1.06e-13	0.365031	0.943	0.831	2.54e-09	3.97e-06	0.295731	0.864	0.786	0.094735	1.33e-59	1.41929	0.98	0.887	3.17e-55	1.66e-37	1.00656	0.972	0.888	3.96e-33	7.74e-08	0.490737	0.936	0.906	0.00184856	8.15e-95	1.32718	0.985	0.899	1.95e-90	3.97e-06	4.89e-94
Radial Glia	13	PGK1	1.9e-15	0.362432	0.851	0.687	4.54e-11	2.1e-09	0.297638	0.806	0.646	5.02e-05	3.57e-52	1.33627	0.955	0.869	8.52e-48	2.92e-27	0.851579	0.886	0.759	6.98e-23	4.56e-16	0.607355	0.86	0.747	1.09e-11	1.26e-90	1.42746	0.958	0.864	3e-86	2.1e-09	7.54e-90
Radial Glia	13	ZFAS1	2.71e-15	0.370162	0.958	0.899	6.47e-11	9.29e-12	0.338551	0.967	0.884	2.22e-07	2.05e-45	0.801057	0.99	0.926	4.9e-41	4.67e-67	0.991386	0.988	0.933	1.12e-62	1.17e-89	0.976099	0.988	0.948	2.79e-85	6.04e-73	0.932482	0.955	0.901	1.44e-68	9.29e-12	7.02e-89
Radial Glia	13	IGFBP2	4.42e-68	1.40029	0.97	0.828	1.05e-63	4.35e-28	0.949517	0.934	0.815	1.04e-23	2.18e-50	1.33044	0.99	0.922	5.21e-46	5.62e-15	0.791751	0.953	0.914	1.34e-10	1.35e-07	0.590445	0.933	0.932	0.00321822	6.59e-88	1.65728	0.994	0.932	1.57e-83	1.35e-07	3.95e-87
Radial Glia	13	SLC3A2	5.61e-44	0.726251	0.851	0.594	1.34e-39	1.96e-26	0.654731	0.824	0.601	4.68e-22	3.93e-41	0.995708	0.94	0.708	9.37e-37	8.05e-51	1.19045	0.894	0.686	1.92e-46	6.84e-72	1.25027	0.915	0.752	1.63e-67	8.43e-85	1.195	0.905	0.636	2.01e-80	1.96e-26	5.06e-84
Radial Glia	13	LINC00473	8.88e-28	0.407121	0.509	0.269	2.12e-23	1.2e-12	0.357618	0.502	0.305	2.87e-08	8.07e-36	0.640765	0.615	0.248	1.93e-31	7.17e-11	0.341948	0.39	0.227	1.71e-06	1.18e-14	0.402617	0.544	0.376	2.81e-10	3.46e-83	0.781986	0.561	0.174	8.25e-79	7.17e-11	2.07e-82
Radial Glia	13	EPB41L4A-AS1	1.43e-25	0.439467	0.826	0.654	3.41e-21	1.33e-16	0.401621	0.799	0.599	3.18e-12	5.35e-38	0.730289	0.9	0.623	1.28e-33	9.64e-43	0.860408	0.854	0.614	2.3e-38	1.81e-77	1.12864	0.895	0.616	4.32e-73	2.31e-55	0.790959	0.816	0.533	5.52e-51	1.33e-16	1.09e-76
Radial Glia	13	SNHG8	9.69e-20	0.429011	0.727	0.54	2.31e-15	2.33e-12	0.336898	0.784	0.594	5.57e-08	2.41e-50	0.90886	0.93	0.633	5.76e-46	1.08e-31	0.814088	0.811	0.584	2.57e-27	2.9e-76	1.03258	0.942	0.73	6.93e-72	3.82e-63	0.86291	0.869	0.575	9.13e-59	2.33e-12	1.74e-75
Radial Glia	13	PTP4A1	7.75e-76	1.14136	0.896	0.601	1.85e-71	7.65e-41	0.849755	0.839	0.559	1.83e-36	8.59e-21	0.617297	0.795	0.576	2.05e-16	5.94e-10	0.317932	0.638	0.513	1.42e-05	6.13e-16	0.438879	0.699	0.544	1.46e-11	2.68e-46	0.749754	0.774	0.503	6.41e-42	5.94e-10	4.65e-75
Radial Glia	13	VIM	1.6e-59	0.95515	0.99	0.943	3.83e-55	5.99e-25	0.632901	0.989	0.919	1.43e-20	2.57e-27	1.12195	0.99	0.896	6.14e-23	5.38e-11	0.514891	0.992	0.942	1.28e-06	2.75e-17	0.482814	0.997	0.956	6.57e-13	1.51e-65	1.28408	1	0.918	3.61e-61	5.38e-11	9.08e-65
Radial Glia	13	ZMAT3	3.18e-65	0.927192	0.715	0.354	7.59e-61	4.39e-35	0.765976	0.733	0.409	1.05e-30	1.46e-30	0.391878	0.5	0.185	3.48e-26	1.54e-17	0.434826	0.409	0.207	3.66e-13	3.78e-27	0.47915	0.477	0.254	9.03e-23	7.35e-49	0.586428	0.469	0.174	1.75e-44	1.54e-17	1.91e-64
Radial Glia	13	LDHA	0.0226063	0.388811	0.3	0.265	1	0.64928	0.305883	0.168	0.165	1	6.41e-13	1.50658	0.615	0.469	1.53e-08	5.34e-10	0.9341	0.52	0.405	1.27e-05	5.45e-12	0.847466	0.664	0.583	1.3e-07	4.32e-64	1.68405	0.858	0.619	1.03e-59	0.64928	2.59e-63
Radial Glia	13	NPC2	4.07e-49	0.730091	0.712	0.408	9.71e-45	5.29e-26	0.613038	0.696	0.414	1.26e-21	1.27e-24	0.612621	0.75	0.471	3.03e-20	1.17e-17	0.578958	0.701	0.517	2.8e-13	2.12e-61	0.916234	0.88	0.635	5.06e-57	2.89e-38	0.620895	0.706	0.415	6.9e-34	1.17e-17	1.27e-60
Radial Glia	13	C6orf48	1.1e-23	0.454943	0.811	0.66	2.63e-19	3.09e-16	0.348511	0.813	0.639	7.38e-12	4.7e-37	0.701724	0.88	0.581	1.12e-32	6.46e-46	0.864743	0.854	0.616	1.54e-41	1.89e-60	1.06434	0.857	0.658	4.51e-56	9.02e-33	0.611864	0.715	0.484	2.15e-28	3.09e-16	1.13e-59
Radial Glia	13	CCNG1	7.61e-18	0.352733	0.809	0.655	1.82e-13	6.86e-17	0.390997	0.864	0.666	1.64e-12	2.69e-27	0.574985	0.88	0.634	6.43e-23	3.67e-15	0.453951	0.807	0.689	8.76e-11	1.01e-59	0.763716	0.93	0.755	2.41e-55	2.14e-43	0.614238	0.864	0.607	5.11e-39	3.67e-15	6.07e-59
Radial Glia	13	CANX	9.73e-17	0.353892	0.921	0.807	2.32e-12	1.38e-15	0.373562	0.93	0.79	3.29e-11	1.97e-27	0.726431	0.98	0.86	4.69e-23	1.41e-10	0.354606	0.839	0.776	3.37e-06	1.65e-20	0.45847	0.909	0.825	3.94e-16	2.8e-56	0.805795	0.944	0.812	6.68e-52	1.41e-10	1.68e-55
Radial Glia	13	XBP1	1.9e-13	0.329301	0.519	0.357	4.53e-09	3.23e-09	0.337765	0.513	0.352	7.71e-05	8.06e-25	0.697013	0.785	0.542	1.92e-20	2.92e-13	0.457829	0.598	0.423	6.96e-09	1.02e-16	0.450106	0.664	0.494	2.43e-12	3.24e-48	0.780836	0.801	0.503	7.73e-44	3.23e-09	1.94e-47
Radial Glia	13	TNFRSF10B	5.77e-22	0.383215	0.509	0.304	1.38e-17	7.94e-11	0.302187	0.469	0.303	1.89e-06	7.55e-25	0.405081	0.51	0.22	1.8e-20	3.22e-20	0.389813	0.492	0.259	7.68e-16	1.37e-25	0.481543	0.553	0.32	3.27e-21	2.51e-47	0.444589	0.487	0.188	5.98e-43	7.94e-11	1.5e-46
Radial Glia	13	TOMM20	1.8e-46	0.63456	0.953	0.839	4.3e-42	5.67e-23	0.484006	0.927	0.777	1.35e-18	5.01e-14	0.37156	0.935	0.867	1.2e-09	3.9e-12	0.331973	0.925	0.844	9.31e-08	3.79e-24	0.415744	0.933	0.857	9.05e-20	7.03e-25	0.459009	0.911	0.808	1.68e-20	3.9e-12	1.08e-45
Radial Glia	13	C1orf54	1.17e-11	0.279574	0.531	0.391	2.79e-07	3.63e-19	0.55473	0.612	0.373	8.68e-15	3.66e-25	0.517117	0.815	0.499	8.74e-21	3.66e-17	0.639305	0.65	0.501	8.75e-13	7.35e-45	0.764986	0.883	0.703	1.76e-40	1.15e-33	0.679898	0.688	0.44	2.75e-29	1.17e-11	4.41e-44
Radial Glia	13	HERPUD1	2.29e-11	0.400637	0.476	0.332	5.47e-07	0.00188706	0.284186	0.407	0.331	1	1.43e-22	0.993686	0.735	0.515	3.41e-18	1.17e-27	0.860518	0.74	0.518	2.8e-23	1.53e-34	0.833268	0.708	0.482	3.65e-30	7.88e-45	0.963493	0.727	0.461	1.88e-40	0.00188706	4.73e-44
Radial Glia	13	RSL24D1	3.58e-36	0.535035	0.933	0.797	8.55e-32	7.61e-16	0.406115	0.923	0.753	1.82e-11	4.86e-32	0.580474	0.965	0.874	1.16e-27	8.84e-16	0.357726	0.906	0.834	2.11e-11	4.63e-22	0.383326	0.918	0.828	1.1e-17	8.93e-45	0.63737	0.941	0.837	2.13e-40	8.84e-16	5.36e-44
Radial Glia	13	BBC3	2.52e-44	0.766981	0.63	0.326	6.01e-40	7.47e-24	0.66712	0.571	0.311	1.78e-19	3.77e-22	0.491001	0.55	0.253	9e-18	6.03e-21	0.521795	0.52	0.284	1.44e-16	5.69e-42	0.642939	0.626	0.333	1.36e-37	1.04e-32	0.567161	0.49	0.225	2.48e-28	6.03e-21	1.51e-43
Radial Glia	13	MEST	2.01e-26	0.488157	0.866	0.657	4.8e-22	1.95e-10	0.268775	0.788	0.601	4.66e-06	2.43e-30	0.901034	0.915	0.711	5.81e-26	3.2e-07	0.331918	0.693	0.591	0.0076487	2.66e-11	0.306677	0.83	0.734	6.35e-07	9.74e-43	0.828435	0.929	0.744	2.33e-38	3.2e-07	5.85e-42
Radial Glia	13	PMAIP1	3.87e-24	0.429138	0.372	0.178	9.23e-20	8.32e-21	0.490784	0.418	0.201	1.99e-16	1.21e-22	0.274273	0.295	0.09	2.9e-18	4.78e-22	0.622986	0.48	0.248	1.14e-17	7.28e-16	0.346863	0.357	0.196	1.74e-11	4.78e-42	0.350652	0.285	0.078	1.14e-37	7.28e-16	2.87e-41
Radial Glia	13	MALAT1	8.58e-18	0.405517	1	1	2.05e-13	5.85e-15	0.380961	1	1	1.4e-10	2.76e-11	0.325496	0.985	0.99	6.58e-07	2.77e-31	0.598415	1	0.987	6.61e-27	3.52e-32	0.514641	1	0.993	8.4e-28	3.95e-41	0.501755	1	0.993	9.44e-37	2.76e-11	2.37e-40
Radial Glia	13	PRDX6	7.82e-19	0.440804	0.883	0.727	1.87e-14	9.86e-16	0.436214	0.857	0.688	2.35e-11	1.13e-26	0.625838	0.965	0.819	2.69e-22	5.75e-10	0.421142	0.925	0.83	1.37e-05	1.16e-12	0.322511	0.968	0.892	2.78e-08	4.95e-39	0.605108	0.944	0.8	1.18e-34	5.75e-10	2.97e-38
Radial Glia	13	SARS	2.48e-21	0.403381	0.752	0.547	5.92e-17	2.47e-06	0.251547	0.597	0.464	0.0589799	5.13e-18	0.532551	0.855	0.723	1.23e-13	1.42e-17	0.485329	0.791	0.644	3.4e-13	5.97e-27	0.464876	0.819	0.651	1.43e-22	1.53e-34	0.60799	0.855	0.703	3.65e-30	2.47e-06	9.16e-34
Radial Glia	13	HSPA9	1.54e-32	0.545055	0.757	0.555	3.67e-28	3.88e-11	0.361595	0.685	0.514	9.26e-07	2.43e-20	0.612512	0.83	0.667	5.81e-16	1.52e-15	0.507526	0.74	0.595	3.64e-11	8.14e-30	0.655664	0.813	0.626	1.94e-25	1.55e-21	0.610052	0.763	0.624	3.7e-17	3.88e-11	9.22e-32
Radial Glia	13	MDM2	2.89e-32	0.665733	0.665	0.426	6.91e-28	1.25e-15	0.533739	0.604	0.398	2.99e-11	3.08e-10	0.320937	0.56	0.362	7.34e-06	2.19e-06	0.339929	0.476	0.374	0.0522253	7.19e-23	0.488868	0.573	0.361	1.72e-18	1.14e-10	0.502691	0.451	0.306	2.72e-06	2.19e-06	1.74e-31
Radial Glia	13	TRMT112	3.59e-30	0.530808	0.883	0.702	8.57e-26	1.12e-10	0.311682	0.864	0.69	2.67e-06	2.91e-09	0.298441	0.95	0.841	6.95e-05	1.29e-07	0.330645	0.89	0.815	0.00308353	2.66e-14	0.41968	0.906	0.838	6.34e-10	1.36e-15	0.339251	0.905	0.798	3.25e-11	1.29e-07	2.15e-29
Radial Glia	13	PHLDA3	1.95e-19	0.324479	0.4	0.217	4.65e-15	1.01e-07	0.262274	0.319	0.196	0.00241912	3.3e-27	0.39796	0.465	0.171	7.87e-23	1.11e-08	0.277725	0.354	0.214	0.000264829	2.81e-19	0.358078	0.45	0.255	6.71e-15	4.69e-26	0.390713	0.35	0.147	1.12e-21	1.01e-07	1.98e-26
Radial Glia	13	RSL1D1	1.58e-26	0.412133	0.854	0.675	3.77e-22	1.61e-15	0.385061	0.842	0.644	3.83e-11	6.8e-11	0.276387	0.915	0.784	1.62e-06	3.33e-11	0.317418	0.898	0.759	7.96e-07	7.77e-11	0.25617	0.883	0.785	1.85e-06	2.39e-20	0.368144	0.866	0.741	5.7e-16	7.77e-11	9.48e-26
Radial Glia	13	TAF1D	1.63e-09	0.261438	0.861	0.752	3.9e-05	7.06e-08	0.342251	0.868	0.753	0.00168582	8.72e-08	0.332454	0.885	0.74	0.00208193	6.35e-11	0.398067	0.799	0.702	1.52e-06	4.34e-25	0.680465	0.845	0.714	1.04e-20	2.08e-18	0.454325	0.858	0.707	4.97e-14	8.72e-08	2.6e-24
Radial Glia	13	GADD45A	1.94e-20	0.669663	0.563	0.367	4.63e-16	9.87e-09	0.463803	0.571	0.435	0.000235743	3.28e-13	0.310723	0.49	0.267	7.82e-09	2.41e-12	0.496391	0.598	0.411	5.75e-08	1.94e-16	0.400974	0.561	0.373	4.63e-12	5.69e-21	0.488265	0.448	0.241	1.36e-16	9.87e-09	3.42e-20
Radial Glia	13	FKBP4	5.97e-17	0.404532	0.794	0.661	1.42e-12	1.16e-17	0.500891	0.846	0.674	2.76e-13	2.97e-20	0.479242	0.875	0.68	7.09e-16	4.07e-14	0.452141	0.717	0.581	9.72e-10	1.26e-08	0.338208	0.743	0.657	0.000300548	2.92e-12	0.383833	0.754	0.631	6.96e-08	1.26e-08	1.78e-19
Neurons	14	SSTR2	7.22e-80	1.59996	0.608	0.044	1.72e-75	7.77e-164	1.98287	0.695	0.067	1.85e-159	1.77e-278	1.90465	0.922	0.19	4.22e-274	3.13e-173	2.11325	0.75	0.098	7.47e-169	0	2.40978	0.837	0.079	0	0	1.74122	0.885	0.212	0	7.22e-80	0
Neurons	14	PPP1R17	3.47e-51	1.80884	0.49	0.045	8.29e-47	6.54e-243	1.70526	0.725	0.046	1.56e-238	1.37e-249	1.31709	0.628	0.082	3.26e-245	3.4e-209	1.82355	0.72	0.074	8.12e-205	3.55e-137	1.59925	0.714	0.139	8.47e-133	0	1.41678	0.694	0.142	0	3.47e-51	0
Neurons	14	NHLH1	1.86e-47	1.52234	0.765	0.114	4.44e-43	2.41e-113	1.28375	0.725	0.102	5.76e-109	0	2.11805	0.962	0.157	0	2.69e-123	1.38948	0.774	0.134	6.42e-119	1.74e-160	1.45544	0.759	0.119	4.14e-156	0	2.02242	0.963	0.196	0	1.86e-47	0
Neurons	14	DLL3	5e-44	2.18443	0.882	0.198	1.19e-39	2.11e-92	1.83531	0.84	0.196	5.04e-88	1e-228	2.67735	0.995	0.424	2.4e-224	2.43e-139	2.83641	0.976	0.277	5.81e-135	2.4e-167	3.07037	0.97	0.275	5.74e-163	0	2.26794	1	0.497	0	5e-44	0
Neurons	14	BARHL1	1.3e-38	0.497139	0.255	0.015	3.11e-34	3.39e-153	0.952823	0.489	0.031	8.1e-149	7.1e-227	1.29774	0.86	0.194	1.7e-222	2.95e-223	1.10725	0.589	0.041	7.05e-219	2.92e-250	1.37501	0.557	0.038	6.97e-246	0	1.35215	0.851	0.204	0	1.3e-38	0
Neurons	14	GCK	1.86e-28	0.343164	0.235	0.018	4.45e-24	1.2e-67	0.628529	0.344	0.037	2.87e-63	4.94e-236	1.00707	0.644	0.093	1.18e-231	6.12e-121	0.944598	0.44	0.044	1.46e-116	9.75e-180	0.989421	0.488	0.042	2.33e-175	0	1.00008	0.643	0.119	0	1.86e-28	0
Neurons	14	LZTS1	5.26e-28	0.88572	0.431	0.061	1.25e-23	4.89e-93	1.03326	0.511	0.061	1.17e-88	3.82e-179	0.986468	0.66	0.134	9.11e-175	5.17e-79	0.780162	0.506	0.086	1.23e-74	6.89e-88	0.682584	0.374	0.05	1.64e-83	0	1.11967	0.738	0.164	0	5.26e-28	0
Neurons	14	INSM1	5.12e-27	0.990898	0.569	0.107	1.22e-22	2.34e-103	1.07415	0.603	0.076	5.59e-99	0	1.85359	0.954	0.181	0	2.08e-128	1.62499	0.839	0.164	4.96e-124	6.25e-221	1.89892	0.823	0.109	1.49e-216	0	1.72073	0.902	0.193	0	5.12e-27	0
Neurons	14	ST18	1.36e-23	1.13681	0.549	0.109	3.24e-19	2.65e-41	0.800756	0.42	0.084	6.33e-37	5.47e-237	0.902386	0.617	0.079	1.31e-232	2.41e-53	0.601331	0.369	0.065	5.74e-49	1.39e-73	0.728475	0.34	0.048	3.32e-69	0	0.910716	0.564	0.076	0	1.36e-23	0
Neurons	14	PHLDA1	3.13e-15	1.39277	0.569	0.179	7.48e-11	2.52e-93	1.65925	0.679	0.115	6.02e-89	4.75e-212	2.03891	0.933	0.335	1.13e-207	1.59e-63	1.36772	0.655	0.191	3.81e-59	4.11e-47	1.11943	0.542	0.182	9.8e-43	0	1.82058	0.91	0.307	0	3.13e-15	0
Neurons	14	CHGA	3e-14	0.447849	0.314	0.06	7.15e-10	3.44e-66	0.653916	0.344	0.037	8.2e-62	2.04e-190	1.60685	0.73	0.16	4.87e-186	5.12e-53	0.869651	0.387	0.073	1.22e-48	1.39e-111	1.44178	0.483	0.069	3.33e-107	0	1.58428	0.767	0.169	0	3e-14	0
Neurons	14	PCBP4	7.27e-18	1.23987	0.902	0.433	1.74e-13	2.09e-40	1.03551	0.794	0.331	4.98e-36	8.21e-182	1.67648	0.987	0.581	1.96e-177	1.02e-50	1.25032	0.875	0.491	2.44e-46	6.25e-88	1.55632	0.921	0.438	1.49e-83	3.9e-301	1.66716	0.992	0.582	9.3e-297	7.27e-18	2.34e-300
Neurons	14	CRABP1	4.98e-31	3.27142	1	0.624	1.19e-26	5.7e-70	3.08653	1	0.741	1.36e-65	2.19e-164	2.32023	0.997	0.667	5.22e-160	2e-69	1.92107	1	0.826	4.78e-65	2.64e-106	2.94793	0.995	0.794	6.3e-102	6.58e-300	2.44174	0.998	0.681	1.57e-295	4.98e-31	3.95e-299
Neurons	14	TMEM176A	1.61e-13	0.919811	0.333	0.07	3.84e-09	7.83e-82	0.86362	0.435	0.049	1.87e-77	9.09e-190	0.948239	0.482	0.06	2.17e-185	4.95e-50	0.860851	0.286	0.043	1.18e-45	1.82e-98	1.01034	0.453	0.067	4.34e-94	2.6e-295	1.18042	0.547	0.087	6.2e-291	1.61e-13	1.56e-294
Neurons	14	IGFBPL1	4.14e-45	2.1645	0.902	0.207	9.88e-41	8.78e-86	2.25242	0.924	0.286	2.1e-81	4.56e-202	1.54006	0.981	0.36	1.09e-197	7.26e-111	2.04454	0.929	0.296	1.73e-106	2.43e-102	1.89485	0.857	0.306	5.79e-98	6.61e-295	1.47902	0.949	0.382	1.58e-290	4.14e-45	3.97e-294
Neurons	14	ENC1	3.81e-23	1.59648	0.745	0.246	9.11e-19	1.34e-71	2.04014	0.832	0.251	3.21e-67	4.23e-192	1.97091	1	0.507	1.01e-187	1.22e-91	2.20273	0.917	0.365	2.92e-87	1.14e-79	1.80228	0.788	0.307	2.72e-75	1.53e-287	1.81006	0.985	0.55	3.65e-283	3.81e-23	9.17e-287
Neurons	14	ELAVL3	3.05e-15	1.06364	0.902	0.529	7.28e-11	5.53e-38	1.27608	0.893	0.519	1.32e-33	4.36e-175	1.61148	0.992	0.54	1.04e-170	1.2e-65	1.5564	0.935	0.535	2.86e-61	1.11e-78	1.57044	0.906	0.488	2.65e-74	6.69e-282	1.5501	0.989	0.548	1.6e-277	3.05e-15	4.01e-281
Neurons	14	RBP1	3.25e-08	1.02599	0.314	0.096	0.00077671	1.86e-54	1.15157	0.435	0.072	4.45e-50	4.64e-159	2.0694	0.943	0.507	1.11e-154	7.58e-125	2.63253	0.929	0.262	1.81e-120	7.96e-107	2.05525	0.744	0.194	1.9e-102	3.78e-281	2.0277	0.959	0.528	9.02e-277	3.25e-08	2.27e-280
Neurons	14	SH3BGRL3	1.09e-18	1.69103	0.882	0.528	2.61e-14	6.05e-65	1.93431	0.954	0.509	1.45e-60	2.17e-160	1.68048	0.987	0.841	5.19e-156	2.9e-76	1.93199	0.964	0.771	6.93e-72	4.15e-74	1.74922	0.951	0.705	9.9e-70	5.55e-275	1.66218	0.994	0.821	1.33e-270	1.09e-18	3.33e-274
Neurons	14	TAGLN3	4.25e-26	1.79234	0.961	0.478	1.01e-21	1.89e-54	1.47095	0.939	0.467	4.52e-50	3.68e-171	1.74852	0.995	0.739	8.77e-167	3.89e-72	1.63994	0.982	0.654	9.29e-68	7.91e-98	1.95228	0.985	0.627	1.89e-93	1.04e-269	1.61604	0.998	0.74	2.49e-265	4.25e-26	6.25e-269
Neurons	14	NCAM1	4.16e-10	0.976552	0.784	0.463	9.94e-06	3.06e-56	1.59504	0.947	0.43	7.31e-52	3.81e-163	1.62043	0.997	0.584	9.1e-159	7.49e-63	1.59928	0.905	0.447	1.79e-58	1.08e-99	1.97965	0.901	0.355	2.57e-95	1.51e-266	1.60464	0.986	0.53	3.61e-262	4.16e-10	9.08e-266
Neurons	14	MFNG	1.26e-32	0.778003	0.451	0.058	3.02e-28	1.08e-48	0.727645	0.412	0.072	2.58e-44	1.39e-251	1.16955	0.79	0.143	3.33e-247	1.15e-67	0.69359	0.423	0.069	2.76e-63	2.49e-73	0.837764	0.473	0.097	5.94e-69	1.04e-262	1.09084	0.757	0.204	2.48e-258	1.26e-32	6.24e-262
Neurons	14	KLHL35	5.77e-19	1.09512	0.49	0.109	1.38e-14	1.99e-43	0.882279	0.435	0.086	4.75e-39	5.1e-154	1.72792	0.825	0.272	1.22e-149	2.11e-70	1.5517	0.732	0.211	5.05e-66	4.73e-72	1.36789	0.601	0.156	1.13e-67	4.02e-257	1.53545	0.796	0.238	9.6e-253	5.77e-19	2.41e-256
Neurons	14	NEUROD4	1.4e-41	1.5139	0.686	0.105	3.35e-37	4.23e-120	1.55425	0.725	0.099	1.01e-115	7.71e-195	0.722339	0.539	0.07	1.84e-190	1.6e-79	0.934968	0.536	0.093	3.82e-75	1.11e-94	1.09107	0.567	0.105	2.65e-90	3.8e-256	0.860125	0.576	0.106	9.06e-252	1.4e-41	2.28e-255
Neurons	14	KLHDC8A	0.000219243	0.275447	0.353	0.169	1	3.96e-27	0.653918	0.489	0.151	9.45e-23	2.18e-169	1.10049	0.809	0.237	5.21e-165	3.39e-22	0.665918	0.577	0.289	8.09e-18	1.74e-29	0.784575	0.601	0.309	4.15e-25	1.13e-254	1.12119	0.778	0.234	2.69e-250	0.000219243	6.76e-254
Neurons	14	NKAIN4	1.18e-11	0.964333	0.843	0.439	2.81e-07	2.58e-23	0.906186	0.718	0.368	6.15e-19	7.35e-170	1.53994	0.997	0.685	1.76e-165	1.58e-57	1.50057	0.923	0.622	3.77e-53	2.78e-68	1.44634	0.916	0.609	6.64e-64	7.69e-254	1.42462	0.988	0.689	1.84e-249	1.18e-11	4.62e-253
Neurons	14	SHD	1.81e-13	0.804339	0.647	0.256	4.32e-09	4.05e-25	0.614616	0.527	0.188	9.67e-21	2.92e-170	1.26658	0.895	0.333	6.97e-166	3.99e-32	0.811814	0.548	0.219	9.53e-28	3.86e-53	1.205	0.714	0.337	9.21e-49	3.06e-250	1.21598	0.867	0.347	7.31e-246	1.81e-13	1.84e-249
Neurons	14	UBE2QL1	3.13e-44	1.21409	0.549	0.064	7.48e-40	2.12e-243	1.79389	0.802	0.057	5.07e-239	7.56e-177	1.44826	0.968	0.347	1.81e-172	1.42e-203	1.83838	0.857	0.111	3.39e-199	7.1e-225	1.90926	0.778	0.094	1.69e-220	3.86e-246	1.23205	0.939	0.345	9.21e-242	3.13e-44	2.31e-245
Neurons	14	MAP1B	4.94e-15	1.23453	0.98	0.86	1.18e-10	9.06e-45	1.39058	0.992	0.851	2.16e-40	3.75e-138	1.25616	1	0.947	8.94e-134	5.11e-58	1.28356	0.994	0.914	1.22e-53	1.66e-72	1.35742	1	0.939	3.96e-68	1.46e-242	1.23767	1	0.946	3.5e-238	4.94e-15	8.78e-242
Neurons	14	TMEM97	2.8e-13	1.18058	0.784	0.436	6.68e-09	1.04e-45	1.46994	0.847	0.415	2.48e-41	5.15e-163	1.74305	0.957	0.588	1.23e-158	7.11e-49	1.22392	0.911	0.65	1.7e-44	2.01e-40	1.05799	0.872	0.676	4.8e-36	4.5e-242	1.58134	0.959	0.603	1.07e-237	2.8e-13	2.7e-241
Neurons	14	CRYBG3	5.08e-19	1.09395	0.569	0.144	1.21e-14	3.28e-09	0.576741	0.282	0.12	7.82e-05	9.85e-182	1.35075	0.776	0.201	2.35e-177	9.5e-57	1.13873	0.506	0.127	2.27e-52	5.19e-08	0.404454	0.212	0.103	0.00123927	8.63e-241	1.17069	0.695	0.187	2.06e-236	5.19e-08	5.18e-240
Neurons	14	LHX9	4.56e-32	0.919686	0.51	0.069	1.09e-27	1.44e-46	0.755138	0.634	0.15	3.43e-42	2.99e-145	1.2318	0.938	0.283	7.13e-141	4.75e-87	1.22318	0.81	0.177	1.13e-82	9.52e-133	1.34667	0.704	0.112	2.27e-128	1.61e-240	1.23925	0.931	0.289	3.85e-236	4.56e-32	9.69e-240
Neurons	14	SOX11	9.86e-14	1.24393	0.941	0.79	2.35e-09	2.99e-46	1.49404	0.977	0.763	7.14e-42	2.15e-136	1.54199	0.997	0.844	5.12e-132	1.88e-49	1.39748	0.952	0.794	4.48e-45	5.51e-61	1.51841	0.936	0.746	1.32e-56	1.68e-233	1.43705	1	0.844	4.02e-229	9.86e-14	1.01e-232
Neurons	14	SOX4	8.57e-13	1.2848	0.98	0.883	2.05e-08	4.61e-37	1.23091	0.992	0.873	1.1e-32	1.8e-131	1.44935	1	0.952	4.3e-127	2.5e-60	1.54256	0.994	0.922	5.96e-56	9.52e-76	1.6796	0.975	0.884	2.27e-71	1.37e-227	1.40912	1	0.946	3.28e-223	8.57e-13	8.24e-227
Neurons	14	CBLB	5.94e-11	0.782522	0.549	0.211	1.42e-06	1.43e-41	1.16475	0.634	0.198	3.42e-37	1.21e-162	1.22644	0.844	0.298	2.88e-158	7.75e-60	1.31126	0.702	0.245	1.85e-55	2.3e-53	1.31581	0.611	0.225	5.5e-49	4.88e-227	1.16048	0.786	0.278	1.16e-222	5.94e-11	2.93e-226
Neurons	14	ADCYAP1	2.2e-24	0.529947	0.314	0.036	5.24e-20	6.1e-59	0.72989	0.382	0.051	1.46e-54	1.96e-152	0.922813	0.698	0.165	4.69e-148	4.71e-129	1.0924	0.571	0.07	1.13e-124	6.23e-105	0.843806	0.389	0.046	1.49e-100	2.36e-225	0.885007	0.642	0.156	5.64e-221	2.2e-24	1.42e-224
Neurons	14	CALM1	1.16e-13	1.33485	1	0.857	2.78e-09	1.62e-48	1.78325	1	0.838	3.86e-44	9.98e-112	1.20006	0.997	0.953	2.38e-107	3.14e-77	1.91707	1	0.961	7.5e-73	7.88e-97	2.06128	1	0.958	1.88e-92	2.34e-224	1.30278	0.998	0.942	5.58e-220	1.16e-13	1.4e-223
Neurons	14	ELAVL4	1.07e-13	0.810117	0.569	0.171	2.54e-09	1.45e-48	0.724918	0.382	0.06	3.45e-44	2.27e-153	1.2432	0.97	0.354	5.43e-149	6.88e-113	1.26259	0.673	0.111	1.64e-108	1.74e-77	1.09035	0.601	0.14	4.16e-73	4.48e-224	1.2149	0.956	0.415	1.07e-219	1.07e-13	2.69e-223
Neurons	14	MEIS2	1.24e-09	1.02121	0.706	0.357	2.96e-05	3.89e-19	0.920411	0.794	0.446	9.3e-15	1.87e-66	0.799707	0.792	0.362	4.47e-62	2e-13	0.713455	0.875	0.695	4.78e-09	3.51e-40	1.42743	0.754	0.441	8.37e-36	9.33e-224	1.23844	0.813	0.26	2.23e-219	1.24e-09	5.6e-223
Neurons	14	NOVA1	3.2e-10	0.946633	0.902	0.634	7.65e-06	5.68e-33	1.28758	0.893	0.532	1.36e-28	5.23e-121	1.20268	1	0.852	1.25e-116	2.56e-36	1.22518	0.869	0.606	6.11e-32	2.31e-30	0.996276	0.778	0.595	5.52e-26	2.39e-216	1.24873	0.998	0.819	5.7e-212	3.2e-10	1.43e-215
Neurons	14	RTN4	3.64e-14	1.0301	0.961	0.77	8.69e-10	1.4e-26	0.939916	0.931	0.761	3.35e-22	4.48e-138	1.17433	0.997	0.934	1.07e-133	4.76e-58	1.16635	0.988	0.912	1.14e-53	8.92e-82	1.44965	0.985	0.899	2.13e-77	9.33e-213	1.04003	1	0.924	2.23e-208	3.64e-14	5.6e-212
Neurons	14	STMN1	1.02e-16	1.29249	0.961	0.829	2.44e-12	3.17e-36	1.1162	0.985	0.865	7.58e-32	4.24e-106	0.978709	1	0.985	1.01e-101	4.42e-47	0.953845	1	0.978	1.05e-42	2.73e-81	1.32692	1	0.97	6.52e-77	6.71e-212	1.07822	1	0.982	1.6e-207	1.02e-16	4.02e-211
Neurons	14	TMSB4X	2.13e-10	1.01446	0.961	0.921	5.09e-06	1.64e-25	1.04389	0.992	0.928	3.91e-21	2.55e-138	1.0893	1	0.982	6.1e-134	4.61e-45	1.09975	1	0.984	1.1e-40	7.49e-84	1.71224	1	0.99	1.79e-79	7.94e-204	1.03491	1	0.975	1.9e-199	2.13e-10	4.76e-203
Neurons	14	MLLT11	4.64e-12	0.960403	0.902	0.601	1.11e-07	2.17e-28	1.02589	0.901	0.587	5.17e-24	1.11e-106	1.21977	1	0.893	2.66e-102	9.66e-55	1.30418	0.994	0.706	2.31e-50	1.22e-79	1.52783	0.98	0.616	2.91e-75	2.94e-201	1.29154	1	0.89	7.01e-197	4.64e-12	1.76e-200
Neurons	14	HOXB9	5.77e-12	1.01624	0.804	0.415	1.38e-07	7.99e-74	1.67404	0.817	0.221	1.91e-69	5.82e-140	1.42204	0.954	0.502	1.39e-135	2.84e-102	1.68345	0.679	0.137	6.77e-98	3.84e-57	1.38183	0.611	0.214	9.18e-53	1.98e-197	1.23353	0.953	0.59	4.72e-193	5.77e-12	1.19e-196
Neurons	14	SRRM4	6e-21	0.998933	0.667	0.175	1.43e-16	4.7e-50	1.12119	0.649	0.167	1.12e-45	2.28e-127	0.972409	0.79	0.261	5.44e-123	2.1e-38	0.855465	0.625	0.228	5.02e-34	9.13e-72	1.00677	0.616	0.159	2.18e-67	3.39e-197	0.995984	0.807	0.287	8.09e-193	6e-21	2.03e-196
Neurons	14	CNTN2	1.74e-12	0.580764	0.49	0.142	4.15e-08	6.03e-40	0.812342	0.588	0.157	1.44e-35	2.71e-154	0.979746	0.717	0.163	6.47e-150	3.89e-62	1.07369	0.631	0.159	9.29e-58	6.9e-84	0.902014	0.547	0.107	1.65e-79	2.99e-195	0.883021	0.648	0.173	7.13e-191	1.74e-12	1.79e-194
Neurons	14	RCOR2	9.93e-10	0.747469	0.686	0.342	2.37e-05	2.82e-30	0.808325	0.702	0.296	6.73e-26	1.26e-124	1.05934	0.914	0.473	3e-120	4.52e-30	0.800165	0.661	0.328	1.08e-25	9.95e-21	0.609844	0.542	0.313	2.38e-16	4.76e-188	0.993708	0.908	0.487	1.14e-183	9.93e-10	2.86e-187
Neurons	14	RASL11B	3.96e-14	0.933342	0.471	0.136	9.45e-10	2.55e-18	0.647386	0.42	0.155	6.1e-14	7.75e-148	1.07668	0.704	0.184	1.85e-143	2.72e-55	1.06165	0.637	0.2	6.5e-51	1.06e-27	0.920428	0.576	0.304	2.54e-23	1.43e-183	0.985983	0.668	0.215	3.41e-179	3.96e-14	8.56e-183
Neurons	14	TUBA1A	5.13e-14	1.29534	1	0.949	1.23e-09	2.57e-37	1.17165	1	0.958	6.14e-33	2e-92	0.82628	1	0.997	4.76e-88	6.73e-54	1.09057	1	0.996	1.61e-49	3.79e-86	1.3982	1	0.994	9.05e-82	5.17e-183	0.880858	1	0.997	1.23e-178	5.13e-14	3.1e-182
Neurons	14	HES6	5.78e-19	2.95469	0.902	0.532	1.38e-14	2.29e-57	2.63813	0.969	0.553	5.46e-53	1.29e-147	2.21674	0.995	0.678	3.08e-143	1.9e-59	2.63324	0.929	0.62	4.55e-55	7.49e-81	3.01095	0.916	0.542	1.79e-76	7.74e-180	1.5631	0.991	0.724	1.85e-175	5.78e-19	4.64e-179
Neurons	14	GNG5	1.25e-08	0.900359	0.863	0.709	0.000299299	1.29e-21	0.829688	0.931	0.716	3.08e-17	1.03e-117	1.00786	0.997	0.843	2.46e-113	8.96e-34	0.803128	0.964	0.85	2.14e-29	4.23e-19	0.588759	0.921	0.894	1.01e-14	1.62e-177	0.918944	0.992	0.864	3.86e-173	1.25e-08	9.71e-177
Neurons	14	EZR	5.34e-10	0.698947	0.49	0.185	1.28e-05	2.67e-32	1.08755	0.611	0.23	6.38e-28	1.41e-98	1.10252	0.852	0.493	3.38e-94	7.03e-45	1.22783	0.78	0.412	1.68e-40	2.44e-28	0.995632	0.606	0.351	5.82e-24	4.18e-177	1.18422	0.841	0.475	9.98e-173	5.34e-10	2.51e-176
Neurons	14	IER2	0.0286196	0.517965	0.608	0.509	1	2.77e-06	0.503569	0.634	0.473	0.0661958	1.9e-116	1.34704	0.97	0.73	4.54e-112	6.13e-18	0.776351	0.857	0.751	1.46e-13	9.59e-16	0.874588	0.818	0.779	2.29e-11	2.08e-175	1.18327	0.982	0.735	4.97e-171	0.0286196	1.25e-174
Neurons	14	HOXB7	2.1e-14	0.795925	0.608	0.21	5.02e-10	3.01e-74	1.59059	0.664	0.136	7.19e-70	3.22e-128	1.33446	0.898	0.492	7.69e-124	6.82e-120	1.847	0.792	0.173	1.63e-115	5.7e-62	1.37113	0.685	0.273	1.36e-57	1.33e-172	1.10291	0.893	0.531	3.18e-168	2.1e-14	7.99e-172
Neurons	14	STMN2	1.13e-12	0.964692	0.902	0.419	2.69e-08	5.02e-44	1.11564	0.977	0.396	1.2e-39	3.76e-86	1.12667	0.978	0.477	8.99e-82	8.69e-54	1.32535	0.958	0.38	2.08e-49	2.92e-96	1.60763	0.961	0.289	6.98e-92	1.04e-169	1.25611	0.994	0.492	2.48e-165	1.13e-12	6.22e-169
Neurons	14	DCX	2.36e-12	0.871106	0.863	0.413	5.63e-08	1.06e-32	1.08482	0.855	0.396	2.54e-28	5.25e-88	0.854565	0.935	0.393	1.25e-83	8.56e-43	0.991825	0.869	0.399	2.04e-38	4.66e-79	1.37372	0.916	0.354	1.11e-74	1.49e-167	0.925803	0.937	0.398	3.55e-163	2.36e-12	8.93e-167
Neurons	14	GPC2	4.71e-11	0.803942	0.804	0.411	1.12e-06	1.11e-29	0.94953	0.748	0.37	2.65e-25	8.32e-96	0.945177	0.968	0.573	1.99e-91	1.36e-41	1.08276	0.821	0.438	3.25e-37	4.19e-56	1.18338	0.793	0.368	1e-51	6.51e-166	0.986818	0.962	0.588	1.56e-161	4.71e-11	3.91e-165
Neurons	14	COTL1	0.000272238	0.61046	0.745	0.536	1	9.11e-15	0.592199	0.748	0.472	2.17e-10	7.18e-100	1.05389	0.957	0.685	1.71e-95	6.55e-19	0.724917	0.798	0.651	1.56e-14	8.45e-25	0.871985	0.803	0.667	2.02e-20	7.82e-166	1.08151	0.951	0.685	1.87e-161	0.000272238	4.69e-165
Neurons	14	CRMP1	4.3e-10	0.973739	0.843	0.537	1.03e-05	2.95e-37	1.05914	0.908	0.483	7.03e-33	8.57e-89	0.938815	0.984	0.657	2.05e-84	3.72e-38	0.885108	0.946	0.689	8.89e-34	4.54e-52	1.09855	0.916	0.627	1.08e-47	1.6e-163	0.986238	0.988	0.668	3.81e-159	4.3e-10	9.58e-163
Neurons	14	RP4-665J23,1	7.43e-12	0.728778	0.549	0.197	1.77e-07	6.6e-43	1.23058	0.748	0.286	1.58e-38	1.84e-127	1.02453	0.906	0.326	4.39e-123	8.98e-49	1.01182	0.732	0.286	2.14e-44	1.76e-47	0.88267	0.567	0.195	4.2e-43	2.23e-160	0.992611	0.907	0.479	5.32e-156	7.43e-12	1.34e-159
Neurons	14	EBF1	6.13e-23	0.687135	0.549	0.108	1.46e-18	1.7e-43	0.744627	0.55	0.131	4.05e-39	4.19e-115	0.867297	0.884	0.319	1e-110	2.53e-69	1.01498	0.685	0.172	6.03e-65	7.8e-54	0.929664	0.498	0.132	1.86e-49	6.27e-160	0.810499	0.776	0.288	1.5e-155	6.13e-23	3.76e-159
Neurons	14	MIAT	2.12e-07	0.598592	0.843	0.568	0.00506706	7.27e-15	0.949248	0.756	0.499	1.73e-10	2.65e-120	1.12759	0.922	0.425	6.33e-116	1.85e-19	0.601834	0.661	0.364	4.41e-15	2.57e-23	0.989706	0.621	0.368	6.13e-19	6.84e-159	1.01233	0.867	0.429	1.63e-154	2.12e-07	4.11e-158
Neurons	14	GREM2	1.95e-11	0.530353	0.333	0.078	4.65e-07	1.03e-50	0.884797	0.45	0.08	2.46e-46	2.02e-119	0.903291	0.636	0.163	4.82e-115	2.38e-116	1.05035	0.53	0.065	5.69e-112	5.1e-110	1.11421	0.473	0.065	1.22e-105	7.67e-155	0.815396	0.622	0.183	1.83e-150	1.95e-11	4.6e-154
Neurons	14	RND3	5.42e-10	1.28809	0.804	0.539	1.3e-05	3.35e-11	0.591151	0.832	0.608	8e-07	3.78e-86	1.02856	0.989	0.775	9.02e-82	2.94e-21	0.746737	0.78	0.542	7.02e-17	2.36e-21	0.860435	0.709	0.506	5.63e-17	3.97e-154	1.08489	0.972	0.747	9.47e-150	5.42e-10	2.38e-153
Neurons	14	SCG3	4.31e-13	0.985592	0.667	0.233	1.03e-08	2.07e-38	1.01498	0.656	0.2	4.94e-34	8.47e-87	0.796492	0.919	0.38	2.02e-82	3.42e-48	1.05724	0.833	0.332	8.15e-44	1.25e-60	1.22197	0.759	0.291	2.99e-56	1.73e-153	0.86026	0.844	0.331	4.13e-149	4.31e-13	1.04e-152
Neurons	14	POU3F2	2.54e-08	0.787895	0.863	0.564	0.000606637	1.19e-25	0.951117	0.901	0.582	2.83e-21	9.3e-109	1.11755	0.946	0.558	2.22e-104	1.62e-33	0.948397	0.839	0.523	3.88e-29	2.93e-36	1.07123	0.754	0.491	7e-32	9.51e-150	1.02376	0.926	0.557	2.27e-145	2.54e-08	5.71e-149
Neurons	14	KALRN	2.4e-16	1.03129	0.49	0.125	5.73e-12	6.94e-64	1.01019	0.603	0.121	1.66e-59	4.13e-121	0.897047	0.714	0.229	9.85e-117	1.29e-49	0.901399	0.56	0.165	3.08e-45	3.41e-58	0.745594	0.453	0.107	8.14e-54	4.28e-148	0.829925	0.632	0.227	1.02e-143	2.4e-16	2.57e-147
Neurons	14	OLIG3	6.17e-69	1.23828	0.471	0.03	1.47e-64	2.25e-80	1.22708	0.618	0.103	5.38e-76	6.29e-95	1.03435	0.846	0.402	1.5e-90	2.69e-144	1.42845	0.75	0.112	6.41e-140	3.2e-92	1.48192	0.69	0.18	7.65e-88	9.94e-109	0.826911	0.884	0.543	2.37e-104	6.17e-69	1.61e-143
Neurons	14	GADD45G	2.63e-05	0.813713	0.471	0.252	0.628255	7.1e-13	0.569319	0.511	0.253	1.7e-08	3.83e-95	0.727503	0.606	0.18	9.14e-91	1.66e-51	1.11059	0.72	0.244	3.96e-47	7.18e-58	1.44707	0.645	0.217	1.71e-53	1.48e-140	0.622971	0.628	0.202	3.53e-136	2.63e-05	8.87e-140
Neurons	14	DCC	4.89e-19	0.896704	0.667	0.193	1.17e-14	2.63e-51	1.23492	0.687	0.194	6.27e-47	8.73e-139	0.994108	0.757	0.24	2.08e-134	9.52e-41	0.827657	0.589	0.205	2.27e-36	4.37e-34	0.7689	0.498	0.189	1.04e-29	3.27e-137	0.767464	0.622	0.237	7.82e-133	4.89e-19	5.24e-138
Neurons	14	AFAP1	8.09e-25	0.954386	0.608	0.133	1.93e-20	1.1e-68	1.20119	0.687	0.152	2.63e-64	3.21e-98	0.773084	0.633	0.214	7.66e-94	1.58e-51	0.911609	0.583	0.172	3.77e-47	6.46e-72	0.861127	0.498	0.109	1.54e-67	1.81e-137	0.724305	0.602	0.211	4.32e-133	8.09e-25	1.08e-136
Neurons	14	MSI2	6.46e-08	0.770743	0.824	0.624	0.00154266	1.05e-14	0.714486	0.847	0.622	2.5e-10	8.19e-87	0.925974	0.908	0.614	1.95e-82	1.39e-17	0.719883	0.756	0.605	3.31e-13	1.1e-23	0.855677	0.734	0.539	2.64e-19	7.95e-134	0.951777	0.862	0.541	1.9e-129	6.46e-08	4.77e-133
Neurons	14	DPYSL3	2.37e-06	0.764984	0.706	0.443	0.056489	2.29e-29	0.79052	0.809	0.376	5.48e-25	1.01e-86	0.853708	0.935	0.513	2.42e-82	1.04e-30	0.796549	0.821	0.452	2.49e-26	5.82e-38	0.905588	0.768	0.434	1.39e-33	1.05e-129	0.80805	0.887	0.492	2.51e-125	2.37e-06	6.31e-129
Neurons	14	TUBB2B	4.21e-09	0.681834	1	0.924	0.00010056	1.94e-23	0.702061	0.992	0.917	4.63e-19	2.14e-69	0.740386	1	0.966	5.11e-65	4.15e-46	0.97788	1	0.96	9.92e-42	1.64e-71	1.17049	1	0.976	3.92e-67	7.22e-126	0.717922	1	0.97	1.72e-121	4.21e-09	4.33e-125
Neurons	14	MAP2	1.9e-07	0.79527	0.882	0.692	0.00453344	1.09e-27	1.15447	0.947	0.689	2.6e-23	1.7e-63	0.766339	0.984	0.818	4.06e-59	3.51e-20	0.660763	0.893	0.769	8.38e-16	4.24e-26	0.812396	0.837	0.685	1.01e-21	2.39e-125	0.890994	0.969	0.727	5.71e-121	1.9e-07	1.44e-124
Neurons	14	C1orf61	0.174016	0.384794	0.275	0.206	1	3.89e-23	0.744879	0.412	0.123	9.29e-19	1.17e-46	0.890497	0.499	0.203	2.8e-42	1.1e-122	1.73098	0.637	0.092	2.63e-118	5e-43	0.977894	0.35	0.082	1.19e-38	6.24e-29	0.456418	0.485	0.284	1.49e-24	0.174016	6.62e-122
Neurons	14	HOXB6	8.54e-16	0.723192	0.647	0.208	2.04e-11	8.63e-59	1.07147	0.557	0.111	2.06e-54	1.28e-122	1.00105	0.765	0.287	3.05e-118	6.69e-82	0.839932	0.452	0.069	1.6e-77	1.02e-33	0.809474	0.374	0.117	2.43e-29	5.87e-115	0.793777	0.654	0.297	1.4e-110	8.54e-16	7.66e-122
Neurons	14	GPR56	3.05e-06	0.561098	0.725	0.459	0.0728795	1.56e-26	0.986012	0.748	0.397	3.72e-22	1.19e-115	1.00947	0.941	0.571	2.84e-111	1.07e-25	0.818056	0.649	0.358	2.55e-21	1.03e-23	0.734651	0.631	0.393	2.47e-19	2.51e-96	0.732795	0.856	0.592	5.98e-92	3.05e-06	7.13e-115
Neurons	14	NFASC	1.7e-10	0.81242	0.51	0.175	4.06e-06	1.81e-61	1.20817	0.725	0.187	4.31e-57	4.13e-88	0.71339	0.674	0.246	9.86e-84	2.86e-51	0.973116	0.583	0.17	6.84e-47	1.48e-42	0.77591	0.458	0.14	3.54e-38	2.3e-114	0.708483	0.616	0.252	5.49e-110	1.7e-10	1.38e-113
Neurons	14	MAP6	1.56e-08	0.944324	0.804	0.563	0.00037324	1.81e-31	0.956609	0.901	0.554	4.32e-27	4.12e-50	0.579092	0.946	0.75	9.83e-46	9.52e-31	0.90124	0.905	0.675	2.27e-26	2.45e-29	0.78666	0.847	0.684	5.85e-25	1.77e-111	0.726906	0.949	0.743	4.23e-107	1.56e-08	1.06e-110
Neurons	14	TAGLN2	1.97e-07	0.339706	0.333	0.111	0.00470291	9.78e-36	1.07526	0.588	0.194	2.34e-31	2.54e-62	0.980366	0.825	0.53	6.06e-58	1.18e-48	1.58352	0.72	0.309	2.81e-44	3.84e-36	1.25785	0.552	0.244	9.16e-32	1.55e-106	1.03215	0.833	0.529	3.71e-102	1.97e-07	9.32e-106
Neurons	14	BCL7A	1.5e-09	0.803454	0.784	0.505	3.58e-05	3.56e-20	0.895718	0.74	0.456	8.49e-16	3.56e-100	0.972999	0.943	0.642	8.5e-96	2.31e-20	0.738042	0.732	0.531	5.51e-16	3.44e-25	0.804196	0.695	0.458	8.22e-21	1.71e-106	0.737842	0.876	0.62	4.08e-102	1.5e-09	1.03e-105
Neurons	14	FAM107B	2.8e-08	0.83231	0.686	0.4	0.000667545	1.01e-12	0.619693	0.695	0.436	2.41e-08	1.11e-79	0.958207	0.852	0.542	2.65e-75	1.93e-22	0.870722	0.762	0.548	4.62e-18	8.89e-18	0.781361	0.66	0.498	2.12e-13	1.54e-105	0.846335	0.807	0.523	3.68e-101	2.8e-08	9.26e-105
Neurons	14	APP	8.79e-05	0.524445	0.843	0.608	1	4.34e-31	1.38823	0.87	0.582	1.04e-26	2.44e-79	0.942696	0.976	0.836	5.83e-75	9.84e-28	1.00407	0.851	0.641	2.35e-23	5.08e-18	0.729761	0.739	0.621	1.21e-13	1.63e-105	0.795234	0.968	0.809	3.89e-101	8.79e-05	9.78e-105
Neurons	14	BASP1	2.38e-09	1.10305	0.922	0.738	5.68e-05	1.18e-27	1.00325	0.954	0.753	2.81e-23	9.34e-62	0.745785	1	0.923	2.23e-57	2.54e-51	1.28595	0.994	0.919	6.06e-47	4.62e-71	1.41266	1	0.898	1.1e-66	5.75e-105	0.672451	1	0.923	1.37e-100	2.38e-09	3.45e-104
Neurons	14	TMSB10	9.77e-12	1.01882	0.98	0.935	2.33e-07	3.29e-19	0.920454	0.992	0.925	7.86e-15	9.17e-63	0.633677	1	0.993	2.19e-58	8.96e-36	0.757313	1	0.988	2.14e-31	3.08e-63	0.99608	1	0.989	7.35e-59	8.84e-100	0.575916	0.998	0.99	2.11e-95	9.77e-12	5.3e-99
Neurons	14	EPB41	1.91e-06	0.569324	0.725	0.451	0.0455646	2.35e-10	0.764382	0.611	0.387	5.62e-06	7.17e-81	0.958227	0.876	0.525	1.71e-76	1.14e-21	0.983297	0.762	0.529	2.71e-17	7.06e-26	0.811591	0.714	0.478	1.69e-21	6.8e-98	0.884795	0.772	0.473	1.62e-93	1.91e-06	4.08e-97
Neurons	14	PID1	1.98e-26	0.816434	0.451	0.069	4.72e-22	4.43e-59	0.827153	0.481	0.082	1.06e-54	8.96e-82	0.640287	0.636	0.213	2.14e-77	1.16e-77	0.884871	0.506	0.09	2.78e-73	1.91e-76	0.715945	0.424	0.073	4.55e-72	6.49e-96	0.581464	0.559	0.219	1.55e-91	1.98e-26	3.9e-95
Neurons	14	ZEB1	3.29e-09	0.669058	0.765	0.465	7.86e-05	1.39e-28	0.914216	0.809	0.437	3.31e-24	5.59e-90	0.919806	0.898	0.542	1.33e-85	3.79e-25	0.845615	0.708	0.445	9.04e-21	9.15e-30	0.934222	0.67	0.426	2.18e-25	1.62e-80	0.6755	0.806	0.551	3.87e-76	3.29e-09	3.35e-89
Neurons	14	DNER	9.13e-19	1.25182	0.667	0.194	2.18e-14	1.1e-76	1.52034	0.863	0.234	2.63e-72	9.8e-43	0.531137	0.887	0.6	2.34e-38	4e-61	1.24821	0.75	0.235	9.54e-57	1.34e-88	1.26319	0.739	0.204	3.19e-84	3.74e-76	0.618452	0.893	0.631	8.94e-72	9.13e-19	8.03e-88
Neurons	14	SEMA6A	2.2e-18	0.995468	0.569	0.156	5.26e-14	5.64e-28	0.851714	0.634	0.24	1.35e-23	3.35e-39	0.471138	0.749	0.462	7.99e-35	2.1e-36	1.01613	0.714	0.344	5.01e-32	1.19e-38	0.872547	0.537	0.204	2.83e-34	2.37e-88	0.642966	0.7	0.371	5.66e-84	2.2e-18	1.42e-87
Neurons	14	RGS16	7.09e-11	0.760108	0.549	0.201	1.69e-06	1.56e-25	1.07176	0.641	0.284	3.72e-21	6.8e-37	0.583922	0.337	0.116	1.62e-32	2.85e-42	1.11423	0.494	0.14	6.82e-38	6.08e-52	1.48517	0.493	0.143	1.45e-47	8.25e-86	0.688598	0.429	0.141	1.97e-81	7.09e-11	4.95e-85
Neurons	14	KIAA1715	1.63e-10	1.02415	0.745	0.416	3.89e-06	2.15e-41	1.39393	0.817	0.39	5.12e-37	8.07e-59	0.703592	0.744	0.438	1.93e-54	1.79e-29	0.825487	0.685	0.356	4.27e-25	2.27e-41	0.956951	0.655	0.309	5.41e-37	5.74e-85	0.681618	0.717	0.421	1.37e-80	1.63e-10	3.44e-84
Neurons	14	2022-09-06	8.13e-05	0.673781	0.588	0.368	1	1.17e-33	1.02498	0.779	0.373	2.79e-29	3.84e-32	0.527815	0.763	0.526	9.18e-28	2.87e-29	0.927108	0.72	0.399	6.85e-25	1.31e-21	0.955868	0.596	0.372	3.14e-17	1.89e-71	0.614884	0.789	0.515	4.52e-67	8.13e-05	1.13e-70
Neurons	14	SYT1	1.22e-09	1.13557	0.647	0.339	2.9e-05	5.58e-27	0.925723	0.84	0.451	1.33e-22	2.54e-55	0.645759	0.927	0.617	6.08e-51	3.68e-49	1.28261	0.917	0.533	8.78e-45	6.46e-42	1.02661	0.808	0.46	1.54e-37	1.32e-66	0.501393	0.916	0.662	3.15e-62	1.22e-09	7.91e-66
Neurons	14	RND2	2.57e-08	0.675693	0.647	0.348	0.000612868	3.15e-14	0.723068	0.534	0.278	7.53e-10	1.81e-65	0.994667	0.873	0.633	4.32e-61	1.04e-23	0.859399	0.714	0.438	2.47e-19	2.36e-27	1.00447	0.729	0.508	5.64e-23	1.41e-54	0.558172	0.851	0.641	3.36e-50	2.57e-08	1.09e-64
Neurons	14	HOXA10	1.3e-09	0.911683	0.686	0.357	3.11e-05	2e-56	1.12446	0.756	0.209	4.77e-52	4.21e-53	0.628106	0.908	0.606	1e-48	5.91e-59	1.06885	0.655	0.191	1.41e-54	2.73e-46	1.19225	0.695	0.335	6.51e-42	1.42e-57	0.48527	0.858	0.62	3.39e-53	1.3e-09	3.55e-58
Neurons	14	SNCG	4.35e-09	0.894444	0.647	0.306	0.000103815	2.49e-29	1.08098	0.634	0.255	5.94e-25	3.48e-31	0.517867	0.488	0.242	8.3e-27	9.18e-27	1.12611	0.643	0.302	2.19e-22	2.89e-29	1.12812	0.764	0.522	6.9e-25	4.26e-58	0.59199	0.508	0.246	1.02e-53	4.35e-09	2.55e-57
Neurons	14	CCND2	8.7e-05	0.881832	0.706	0.529	1	1.03e-30	1.16423	0.893	0.526	2.47e-26	2.02e-37	0.829914	0.792	0.594	4.81e-33	5.56e-07	0.60342	0.619	0.508	0.0132736	3.7e-19	0.821033	0.709	0.524	8.82e-15	2.29e-38	0.50788	0.747	0.579	5.47e-34	8.7e-05	1.37e-37
Oligodendrocytes	15	RXRG	0	0.994864	0.6	0.004	0	2.39e-132	0.524231	0.283	0.005	5.7e-128	1.01e-181	0.607698	0.339	0.019	2.42e-177	0	1.41793	0.719	0.02	0	1.83e-236	0.820467	0.427	0.01	4.38e-232	0	0.912695	0.505	0.02	0	2.39e-132	0
Oligodendrocytes	15	GPR126	0	1.27438	0.6	0.006	0	6.04e-177	1.18876	0.377	0.006	1.44e-172	0	0.640059	0.612	0.027	0	0	1.16671	0.597	0.008	0	0	0.809306	0.483	0.009	0	0	0.765605	0.667	0.031	0	6.04e-177	0
Oligodendrocytes	15	OLFML2A	0	2.70368	0.75	0.007	0	5.66e-153	2.10861	0.472	0.013	1.35e-148	6.35e-95	0.723721	0.31	0.035	1.52e-90	0	2.44245	0.769	0.011	0	8.73e-205	1.73624	0.393	0.01	2.08e-200	0	1.16557	0.492	0.029	0	6.35e-95	0
Oligodendrocytes	15	CDH19	0	2.12521	0.725	0.001	0	0	0.90786	0.283	0	0	0	0.681614	0.441	0.002	0	0	2.21204	0.828	0.004	0	0	0.904554	0.427	0.001	0	0	1.09349	0.578	0.006	0	0	0
Oligodendrocytes	15	SOX10	0	1.26939	0.625	0.002	0	0	0.949832	0.472	0.001	0	0	1.12479	0.902	0.007	0	0	1.52075	0.794	0.004	0	0	1.21226	0.551	0.001	0	0	1.30079	0.889	0.015	0	0	0
Oligodendrocytes	15	S100B	1.21e-295	0.824338	0.5	0.004	2.89e-291	2.82e-127	0.609567	0.302	0.006	6.72e-123	0	2.4114	0.718	0.029	0	0	3.41389	0.85	0.026	0	0	2.53985	0.584	0.009	0	0	2.53729	0.687	0.03	0	2.82e-127	0
Oligodendrocytes	15	ETS1	7.08e-270	1.42499	0.775	0.014	1.69e-265	4.67e-163	1.5414	0.717	0.03	1.11e-158	0	1.54174	0.914	0.022	0	0	1.42559	0.753	0.054	0	8.07e-247	0.844374	0.539	0.016	1.93e-242	0	1.33564	0.843	0.028	0	4.67e-163	0
Oligodendrocytes	15	INPP4B	1.81e-260	1.74716	0.7	0.012	4.32e-256	0	1.6886	0.698	0.011	0	0	0.777865	0.747	0.04	0	0	1.13342	0.637	0.025	0	1.51e-247	1.01954	0.584	0.02	3.61e-243	0	0.936172	0.793	0.052	0	1.51e-247	0
Oligodendrocytes	15	S100A11	2.2e-226	1.89109	0.725	0.015	5.25e-222	7.05e-127	1.95977	0.698	0.037	1.68e-122	3.66e-210	2.70786	0.992	0.269	8.73e-206	0	2.57829	0.869	0.062	0	1.23e-197	3.11789	0.921	0.074	2.95e-193	0	2.78244	0.997	0.29	0	7.05e-127	0
Oligodendrocytes	15	SEMA3C	3.12e-218	1.65528	0.6	0.01	7.45e-214	3.75e-151	2.03599	0.585	0.021	8.95e-147	1.89e-126	1.20235	0.898	0.275	4.51e-122	0	2.30888	0.875	0.053	0	5.02e-143	1.736	0.618	0.044	1.2e-138	1.3e-200	1.25376	0.869	0.25	3.11e-196	1.89e-126	0
Oligodendrocytes	15	AHR	1.12e-203	1.50251	0.65	0.014	2.67e-199	8.99e-42	0.616721	0.34	0.027	2.15e-37	0	0.672004	0.49	0.013	0	0	1.98869	0.8	0.024	0	3.27e-170	1.22695	0.472	0.019	7.8e-166	0	0.885689	0.556	0.014	0	8.99e-42	0
Oligodendrocytes	15	SLITRK6	2.91e-177	1.68016	0.625	0.015	6.95e-173	9.93e-27	0.675031	0.245	0.022	2.37e-22	1.66e-187	0.930933	0.249	0.008	3.97e-183	0	1.88787	0.672	0.021	0	9.7e-31	0.791555	0.281	0.039	2.32e-26	0	1.3183	0.422	0.012	0	9.93e-27	0
Oligodendrocytes	15	TGFBR2	6.06e-158	0.952372	0.5	0.01	1.45e-153	8.55e-25	0.582859	0.208	0.017	2.04e-20	4.47e-77	0.455892	0.359	0.057	1.07e-72	0	2.0563	0.738	0.026	0	1.8e-78	0.764633	0.348	0.024	4.29e-74	3.21e-279	0.542592	0.485	0.044	7.66e-275	8.55e-25	0
Oligodendrocytes	15	IGFBP7	7.66e-135	1.8039	0.55	0.016	1.83e-130	5.05e-77	1.22847	0.358	0.016	1.2e-72	3.01e-222	3.4525	0.931	0.195	7.2e-218	2.73e-137	1.59412	0.453	0.068	6.52e-133	4.53e-99	2.54297	0.596	0.059	1.08e-94	0	3.44363	0.914	0.175	0	5.05e-77	0
Oligodendrocytes	15	S100A10	4.43e-130	2.99659	0.95	0.056	1.06e-125	8.15e-115	2.66313	0.83	0.064	1.95e-110	2.37e-204	3.13329	1	0.289	5.65e-200	0	3.47905	0.959	0.099	0	2.95e-104	3.15203	0.91	0.159	7.03e-100	5.46e-302	3.30992	1	0.332	1.3e-297	2.95e-104	0
Oligodendrocytes	15	RP4-792G4,2	9.42e-125	1.25386	0.75	0.032	2.25e-120	6.98e-155	0.746234	0.491	0.013	1.67e-150	0	0.959175	0.845	0.024	0	0	1.35508	0.731	0.025	0	0	1.24565	0.73	0.02	0	0	1.07332	0.848	0.021	0	9.42e-125	0
Oligodendrocytes	15	BCAN	1.31e-124	0.632409	0.325	0.005	3.14e-120	1.56e-99	0.654984	0.264	0.006	3.73e-95	0	2.55209	0.771	0.018	0	2.28e-163	0.612037	0.153	0.003	5.44e-159	2.17e-143	0.78526	0.225	0.004	5.18e-139	0	2.45793	0.631	0.031	0	1.56e-99	0
Oligodendrocytes	15	GAS7	2.32e-116	0.875677	0.65	0.026	5.54e-112	1.15e-52	0.761742	0.472	0.041	2.76e-48	9.02e-126	0.58033	0.616	0.108	2.15e-121	0	1.66293	0.816	0.03	0	5.3e-140	1.06733	0.539	0.033	1.27e-135	1.63e-264	0.634481	0.636	0.086	3.88e-260	1.15e-52	0
Oligodendrocytes	15	ERBB3	1.57e-114	0.913702	0.55	0.019	3.74e-110	8.05e-87	0.835225	0.415	0.019	1.92e-82	0	0.896921	0.759	0.017	0	0	1.29629	0.681	0.014	0	3.05e-149	0.834777	0.382	0.014	7.27e-145	0	0.844348	0.664	0.026	0	8.05e-87	0
Oligodendrocytes	15	IFI16	4.24e-109	0.435916	0.375	0.009	1.01e-104	2.91e-108	0.660024	0.358	0.01	6.94e-104	0	1.22129	0.776	0.014	0	0	0.955813	0.503	0.025	0	5.59e-223	0.965072	0.506	0.016	1.33e-218	0	1.06352	0.71	0.019	0	2.91e-108	0
Oligodendrocytes	15	DAB2	8.19e-108	0.833793	0.45	0.013	1.95e-103	5.13e-121	1.80362	0.566	0.025	1.23e-116	0	2.12609	0.873	0.042	0	5.93e-308	1.67703	0.584	0.05	1.42e-303	1.71e-74	1.09796	0.393	0.033	4.07e-70	0	1.95288	0.869	0.046	0	1.71e-74	0
Oligodendrocytes	15	TFAP2A	5.95e-107	1.76645	0.8	0.044	1.42e-102	1.13e-153	1.60554	0.717	0.032	2.7e-149	0	1.73878	0.922	0.044	0	0	1.20476	0.734	0.071	0	4.86e-154	1.32655	0.719	0.053	1.16e-149	0	1.85189	0.929	0.049	0	5.95e-107	0
Oligodendrocytes	15	PAG1	1.73e-105	1.57811	0.775	0.044	4.13e-101	4.2e-48	1.61121	0.566	0.067	1e-43	1.7e-215	0.72152	0.69	0.08	4.06e-211	2.67e-244	1.30317	0.681	0.096	6.37e-240	5.45e-42	0.794294	0.449	0.074	1.3e-37	0	1.02752	0.758	0.071	0	5.45e-42	0
Oligodendrocytes	15	MOXD1	7.37e-103	1.46451	0.675	0.033	1.76e-98	1.52e-68	0.70944	0.358	0.018	3.64e-64	3.96e-187	0.910704	0.445	0.035	9.45e-183	0	1.7691	0.741	0.025	0	4.82e-86	0.830347	0.371	0.025	1.15e-81	0	1.23974	0.593	0.023	0	1.52e-68	0
Oligodendrocytes	15	FRMD6	1.13e-96	0.855543	0.5	0.019	2.69e-92	2.91e-36	0.75514	0.377	0.038	6.95e-32	0	0.604043	0.522	0.023	0	0	1.42593	0.681	0.042	0	5.51e-122	0.973468	0.461	0.027	1.32e-117	0	0.734642	0.518	0.02	0	2.91e-36	0
Oligodendrocytes	15	NQO1	5.26e-76	1.48566	0.5	0.025	1.26e-71	9.74e-74	1.63148	0.509	0.035	2.32e-69	6.52e-236	1.68817	0.771	0.104	1.56e-231	3.44e-94	1.07847	0.428	0.09	8.21e-90	2.08e-55	1.33129	0.607	0.112	4.96e-51	0	1.79529	0.808	0.102	0	2.08e-55	0
Oligodendrocytes	15	CDH6	4.85e-71	1.18529	0.6	0.038	1.16e-66	2.65e-20	0.848191	0.264	0.033	6.32e-16	0.000329549	0.457538	0.302	0.221	1	0	2.20289	0.778	0.033	0	1.07e-91	1.36006	0.348	0.021	2.56e-87	7.01e-36	0.785652	0.452	0.206	1.67e-31	0.000329549	0
Oligodendrocytes	15	PLAT	1.03e-69	0.597937	0.475	0.024	2.46e-65	8.92e-58	0.95017	0.472	0.038	2.13e-53	3.42e-156	0.772004	0.682	0.11	8.17e-152	3.38e-263	1.12823	0.591	0.063	8.08e-259	1.3e-73	0.921729	0.573	0.071	3.09e-69	0	0.976534	0.77	0.114	0	8.92e-58	0
Oligodendrocytes	15	LAMC1	1.33e-66	1.95898	0.675	0.055	3.19e-62	1.46e-39	1.31609	0.509	0.065	3.49e-35	2.45e-89	0.642578	0.539	0.112	5.84e-85	0	2.09622	0.819	0.095	0	2e-65	1.2361	0.663	0.111	4.77e-61	5.68e-220	0.876631	0.664	0.115	1.36e-215	1.46e-39	0
Oligodendrocytes	15	MMP2	8.75e-66	1.50546	0.7	0.059	2.09e-61	5.64e-46	1.23976	0.623	0.083	1.35e-41	5.86e-44	0.844467	0.539	0.195	1.4e-39	0	2.16558	0.841	0.083	0	1.6e-39	1.37097	0.551	0.121	3.81e-35	1.54e-132	1.17022	0.616	0.165	3.67e-128	1.6e-39	0
Oligodendrocytes	15	FN1	1.98e-50	3.32887	0.8	0.104	4.74e-46	3.12e-10	1.9538	0.377	0.111	7.45e-06	1.31e-25	1.19593	0.531	0.252	3.13e-21	0	3.72121	0.919	0.14	0	4.78e-41	2.33973	0.607	0.143	1.14e-36	9.7e-105	1.86556	0.674	0.239	2.31e-100	3.12e-10	0
Oligodendrocytes	15	MEF2C	7.59e-48	1.51694	0.75	0.09	1.81e-43	1.28e-16	0.628854	0.434	0.096	3.05e-12	0	0.885036	0.759	0.061	0	8.22e-302	1.54842	0.787	0.109	1.96e-297	2.33e-48	0.82558	0.483	0.075	5.56e-44	0	1.15328	0.765	0.045	0	1.28e-16	0
Oligodendrocytes	15	MLANA	1.8e-43	0.356955	0.125	0.002	4.29e-39	3.59e-276	1.89738	0.358	0.002	8.56e-272	0	4.29318	0.771	0.028	0	1.18e-110	1.75845	0.119	0.004	2.82e-106	1.02e-254	2.75802	0.236	0.002	2.45e-250	0	4.02625	0.626	0.051	0	1.8e-43	0
Oligodendrocytes	15	C9orf3	2.68e-42	0.760166	0.55	0.054	6.39e-38	3.2e-33	0.93983	0.453	0.06	7.64e-29	2.59e-250	0.803254	0.743	0.08	6.17e-246	8.06e-121	0.715055	0.441	0.074	1.92e-116	1.57e-70	0.881952	0.607	0.085	3.75e-66	0	1.10055	0.808	0.072	0	3.2e-33	0
Oligodendrocytes	15	CAPN3	3.22e-41	0.460328	0.25	0.011	7.69e-37	1.17e-164	1.60474	0.509	0.014	2.79e-160	0	1.28079	0.727	0.014	0	6.68e-262	1.2012	0.4	0.023	1.6e-257	2.29e-168	1.3182	0.438	0.017	5.48e-164	0	1.4632	0.697	0.02	0	3.22e-41	0
Oligodendrocytes	15	CRYL1	2.41e-34	0.856761	0.65	0.094	5.76e-30	2.02e-11	0.41371	0.396	0.105	4.82e-07	8.85e-202	1.31925	0.914	0.197	2.11e-197	1.15e-210	1.2837	0.722	0.132	2.74e-206	1.98e-41	1.01511	0.674	0.172	4.73e-37	0	1.34192	0.912	0.152	0	2.02e-11	0
Oligodendrocytes	15	BACE2	1.13e-32	0.865906	0.475	0.05	2.71e-28	2.68e-16	0.834626	0.377	0.079	6.39e-12	0	1.47304	0.922	0.081	0	2.26e-194	1.10834	0.616	0.099	5.4e-190	1.62e-48	1.20826	0.562	0.106	3.87e-44	0	1.71291	0.937	0.082	0	2.68e-16	0
Oligodendrocytes	15	ECM1	1.16e-25	0.375282	0.3	0.026	2.77e-21	2.27e-155	1.16968	0.623	0.023	5.43e-151	1.12e-294	0.897923	0.588	0.037	2.68e-290	9.32e-187	0.617398	0.341	0.025	2.23e-182	1.67e-118	0.884736	0.472	0.029	4e-114	0	1.2187	0.715	0.05	0	1.16e-25	0
Oligodendrocytes	15	PLP1	1.46e-24	1.91235	0.8	0.211	3.49e-20	4.04e-104	3.30822	0.906	0.09	9.63e-100	1.61e-238	2.09436	0.984	0.219	3.84e-234	0	3.02503	0.922	0.106	0	3.86e-144	3.26909	0.876	0.102	9.21e-140	0	2.40934	0.977	0.189	0	1.46e-24	0
Oligodendrocytes	15	ARPC1B	8.32e-19	0.667937	0.5	0.094	1.99e-14	3.66e-07	0.319206	0.321	0.107	0.00873858	9.5e-203	1.5979	0.918	0.202	2.27e-198	5.78e-249	2.15654	0.85	0.188	1.38e-244	6.02e-54	1.42263	0.764	0.199	1.44e-49	0	1.60759	0.917	0.185	0	3.66e-07	0
Oligodendrocytes	15	MEGF10	1.98e-13	0.895782	0.5	0.133	4.72e-09	5.91e-13	1.13358	0.321	0.071	1.41e-08	5.08e-20	0.289831	0.302	0.113	1.21e-15	0	1.68596	0.731	0.079	0	6.82e-24	0.791933	0.337	0.072	1.63e-19	4.6e-113	0.607655	0.414	0.081	1.1e-108	5.91e-13	0
Oligodendrocytes	15	CRYAB	2.92e-09	1.46818	0.45	0.13	6.96e-05	2.5e-31	2.98287	0.679	0.141	5.97e-27	1.11e-115	1.41042	0.376	0.042	2.64e-111	0	1.49947	0.369	0.011	0	3.98e-62	1.26305	0.258	0.017	9.5e-58	2.13e-288	1.11622	0.361	0.021	5.07e-284	2.92e-09	0
Oligodendrocytes	15	SNCA	2.14e-13	0.498292	0.375	0.068	5.1e-09	4.79e-10	0.442362	0.396	0.117	1.14e-05	1.01e-233	1.71441	0.922	0.171	2.41e-229	2.48e-16	0.323138	0.388	0.204	5.92e-12	1.02e-09	0.693251	0.461	0.225	2.43e-05	9.05e-307	1.51944	0.851	0.16	2.16e-302	1.02e-09	5.43e-306
Oligodendrocytes	15	PLS3	5.86e-21	1.28894	0.75	0.22	1.4e-16	2.94e-36	1.33457	0.717	0.139	7.01e-32	6.64e-163	1.45735	0.861	0.192	1.59e-158	1.07e-238	2.18891	0.866	0.207	2.55e-234	9.7e-35	1.63783	0.73	0.269	2.32e-30	3.88e-303	1.66075	0.854	0.165	9.26e-299	5.86e-21	2.33e-302
Oligodendrocytes	15	ADAM12	1.86e-37	0.558629	0.3	0.018	4.43e-33	1.3e-23	0.727413	0.189	0.015	3.11e-19	1.39e-75	0.803486	0.331	0.051	3.33e-71	3.61e-297	1.81929	0.581	0.053	8.61e-293	1.97e-21	0.928063	0.303	0.063	4.71e-17	3.36e-247	1.00453	0.47	0.049	8.03e-243	1.97e-21	2.16e-296
Oligodendrocytes	15	COL1A1	1.06e-74	1.72666	0.75	0.059	2.52e-70	4.34e-22	0.632969	0.528	0.109	1.04e-17	4.42e-13	0.430692	0.237	0.098	1.06e-08	5.26e-295	1.43152	0.534	0.038	1.26e-290	9.84e-43	0.743403	0.404	0.056	2.35e-38	5.64e-126	1.01725	0.412	0.076	1.35e-121	4.42e-13	3.16e-294
Oligodendrocytes	15	LGALS1	2.05e-35	2.37752	0.875	0.19	4.89e-31	2.07e-21	1.83917	0.774	0.293	4.94e-17	5.77e-182	2.75598	0.963	0.272	1.38e-177	5.14e-247	2.72961	0.941	0.241	1.23e-242	3.61e-43	2.09949	0.888	0.383	8.61e-39	1.29e-292	2.84862	0.967	0.269	3.09e-288	2.07e-21	7.76e-292
Oligodendrocytes	15	PMEL	3e-74	1.3451	0.45	0.02	7.17e-70	8.12e-198	2.00265	0.698	0.023	1.94e-193	2.05e-278	5.09113	0.902	0.139	4.89e-274	3.5e-41	2.1573	0.225	0.051	8.35e-37	1.44e-32	3.504	0.371	0.067	3.45e-28	7.71e-291	4.87722	0.813	0.165	1.84e-286	1.44e-32	4.63e-290
Oligodendrocytes	15	PRKD3	1.15e-11	0.904298	0.575	0.184	2.75e-07	1.86e-16	1.18298	0.604	0.189	4.44e-12	4.67e-193	1.86283	0.976	0.262	1.12e-188	1.32e-61	0.866756	0.569	0.221	3.15e-57	1.75e-32	1.2266	0.708	0.234	4.17e-28	1.64e-286	1.62871	0.902	0.206	3.92e-282	1.15e-11	9.84e-286
Oligodendrocytes	15	APOE	9.8e-35	1.33692	0.625	0.086	2.34e-30	7.97e-44	1.92375	0.792	0.16	1.9e-39	2.2e-193	3.25414	0.947	0.253	5.25e-189	6.19e-63	1.23929	0.469	0.141	1.48e-58	1.49e-42	1.9312	0.73	0.205	3.56e-38	2.02e-284	3.10377	0.932	0.241	4.82e-280	9.8e-35	1.21e-283
Oligodendrocytes	15	CYBA	8.22e-22	0.87981	0.55	0.095	1.96e-17	2.9e-20	0.5873	0.547	0.123	6.92e-16	5.05e-145	1.31911	0.951	0.307	1.21e-140	2.01e-137	1.18496	0.787	0.242	4.8e-133	3.09e-35	1.18428	0.674	0.209	7.38e-31	3.51e-284	1.324	0.942	0.218	8.38e-280	2.9e-20	2.11e-283
Oligodendrocytes	15	SOX6	2.63e-104	1.50537	0.55	0.021	6.27e-100	2.14e-103	1.38974	0.547	0.028	5.11e-99	4.45e-176	0.787768	0.747	0.121	1.06e-171	1.45e-278	1.02346	0.588	0.056	3.47e-274	1.11e-53	0.826124	0.461	0.062	2.64e-49	5.01e-244	0.780599	0.667	0.105	1.2e-239	1.11e-53	8.72e-278
Oligodendrocytes	15	CRTAP	1.52e-30	1.05749	0.65	0.11	3.63e-26	8.38e-60	1.71688	0.755	0.102	2e-55	7.48e-177	0.976517	0.906	0.218	1.79e-172	2.67e-108	0.778358	0.622	0.171	6.37e-104	1.47e-34	0.802033	0.685	0.214	3.51e-30	1.01e-271	0.922939	0.876	0.184	2.41e-267	1.52e-30	6.06e-271
Oligodendrocytes	15	PMP22	7.87e-67	1.277	0.6	0.041	1.88e-62	5.39e-38	0.983271	0.566	0.081	1.29e-33	6.41e-39	0.822182	0.518	0.191	1.53e-34	8.49e-268	1.76245	0.772	0.121	2.03e-263	6.12e-51	1.91026	0.652	0.139	1.46e-46	2.62e-209	1.25257	0.674	0.131	6.26e-205	5.39e-38	5.09e-267
Oligodendrocytes	15	TPM2	2.88e-64	1.67635	0.65	0.051	6.87e-60	4.74e-18	0.705764	0.396	0.076	1.13e-13	7.15e-129	0.969908	0.78	0.176	1.71e-124	7.09e-267	1.37382	0.656	0.077	1.69e-262	1.67e-48	1.25446	0.528	0.089	3.98e-44	9.03e-211	1.26766	0.75	0.16	2.15e-206	4.74e-18	4.25e-266
Oligodendrocytes	15	DNAJC1	1.05e-22	1.88632	0.875	0.315	2.51e-18	7.52e-25	1.41202	0.811	0.29	1.8e-20	2.77e-146	1.63158	0.971	0.419	6.6e-142	1.12e-132	1.38408	0.875	0.388	2.67e-128	1e-25	1.10563	0.876	0.494	2.4e-21	3.63e-261	1.79108	0.98	0.367	8.66e-257	1.05e-22	2.18e-260
Oligodendrocytes	15	TSPO	6.26e-24	0.748261	0.55	0.095	1.49e-19	3.55e-15	0.862381	0.585	0.187	8.47e-11	1.35e-145	1.29659	0.935	0.299	3.22e-141	8.29e-92	0.865205	0.669	0.218	1.98e-87	8.75e-34	1.07729	0.742	0.256	2.09e-29	1.21e-246	1.1686	0.917	0.233	2.9e-242	3.55e-15	7.28e-246
Oligodendrocytes	15	ANXA2	3.9e-36	2.52635	0.9	0.203	9.32e-32	1.93e-38	2.96865	0.887	0.273	4.62e-34	2.95e-76	1.6329	0.996	0.552	7.04e-72	6.38e-245	2.82927	0.916	0.233	1.52e-240	1.02e-50	2.55259	0.899	0.364	2.45e-46	1.14e-164	1.85552	0.995	0.599	2.71e-160	3.9e-36	3.83e-244
Oligodendrocytes	15	COL1A2	2.78e-33	0.985351	0.425	0.04	6.64e-29	6.76e-15	0.93625	0.434	0.104	1.61e-10	6.88e-42	0.587969	0.947	0.488	1.64e-37	8.79e-242	1.40689	0.681	0.088	2.1e-237	1.19e-63	1.97277	0.809	0.167	2.84e-59	6.44e-57	0.58496	0.929	0.518	1.54e-52	6.76e-15	5.28e-241
Oligodendrocytes	15	ANXA1	1.17e-44	0.592397	0.2	0.006	2.8e-40	1.79e-13	0.292632	0.113	0.01	4.28e-09	1.82e-11	1.05008	0.278	0.14	4.34e-07	3.02e-239	1.22555	0.369	0.022	7.2e-235	9.89e-77	1.0729	0.326	0.021	2.36e-72	2.28e-29	0.99079	0.283	0.106	5.44e-25	1.82e-11	1.81e-238
Oligodendrocytes	15	COL4A1	2.29e-28	1.45956	0.625	0.105	5.46e-24	5.84e-14	1.01652	0.396	0.097	1.39e-09	2.92e-43	0.562969	0.441	0.13	6.98e-39	2.23e-237	2.41569	0.803	0.161	5.33e-233	8.26e-24	1.39006	0.517	0.158	1.97e-19	2.2e-142	0.843883	0.563	0.122	5.24e-138	5.84e-14	1.34e-236
Oligodendrocytes	15	MFSD12	3.58e-17	0.638414	0.475	0.091	8.54e-13	2.3e-36	1.39708	0.547	0.081	5.49e-32	3.07e-122	1.17456	0.882	0.269	7.33e-118	8.89e-85	0.956259	0.531	0.15	2.12e-80	4.26e-38	1.18673	0.607	0.15	1.02e-33	3.5e-234	1.4842	0.869	0.221	8.36e-230	3.58e-17	2.1e-233
Oligodendrocytes	15	WWTR1	9.84e-24	1.16052	0.525	0.09	2.35e-19	1.93e-16	0.852169	0.528	0.144	4.62e-12	1.65e-36	0.489245	0.58	0.227	3.93e-32	8.04e-228	1.60216	0.825	0.175	1.92e-223	1.42e-35	0.754927	0.596	0.15	3.38e-31	2.23e-69	0.560608	0.591	0.218	5.32e-65	1.93e-16	4.83e-227
Oligodendrocytes	15	TIMP2	2.51e-14	0.593281	0.65	0.181	5.98e-10	4.67e-32	1.60131	0.774	0.191	1.11e-27	4.14e-108	1.08865	0.939	0.383	9.88e-104	1.41e-46	0.702134	0.619	0.291	3.37e-42	6.82e-32	0.973642	0.697	0.221	1.63e-27	1.74e-224	1.21707	0.907	0.26	4.15e-220	2.51e-14	1.04e-223
Oligodendrocytes	15	EMP3	2.96e-17	0.616754	0.575	0.128	7.07e-13	5.34e-14	0.916452	0.566	0.179	1.28e-09	1.55e-130	1.40244	0.951	0.354	3.7e-126	1.36e-114	1.23187	0.716	0.228	3.24e-110	4.14e-42	1.59078	0.809	0.271	9.89e-38	2.25e-220	1.52164	0.967	0.359	5.38e-216	5.34e-14	1.35e-219
Oligodendrocytes	15	TLE1	2.72e-11	0.668497	0.675	0.242	6.49e-07	1.34e-14	1.14754	0.623	0.22	3.2e-10	8.79e-139	1.07591	0.935	0.281	2.1e-134	1.99e-88	0.972885	0.781	0.332	4.76e-84	1.96e-38	1.11568	0.82	0.284	4.67e-34	2.47e-216	1.03495	0.881	0.234	5.89e-212	2.72e-11	1.48e-215
Oligodendrocytes	15	PTGDS	3.14e-102	1.58699	0.45	0.014	7.5e-98	4.41e-169	2.61503	0.736	0.031	1.05e-164	1.1e-193	3.38166	0.78	0.143	2.63e-189	1.92e-31	1.55848	0.181	0.042	4.59e-27	5.71e-91	3.36771	0.551	0.054	1.36e-86	2.51e-209	3.63788	0.657	0.142	5.99e-205	1.92e-31	1.51e-208
Oligodendrocytes	15	IFITM3	2.39e-29	2.02868	0.8	0.19	5.7e-25	3.56e-31	1.76633	0.736	0.176	8.51e-27	1.83e-94	0.960359	0.792	0.224	4.37e-90	2.71e-180	1.75536	0.819	0.213	6.46e-176	1.39e-43	1.8944	0.685	0.176	3.31e-39	4.27e-200	1.16207	0.75	0.162	1.02e-195	2.39e-29	2.56e-199
Oligodendrocytes	15	ZEB2	1.08e-16	1.79592	0.9	0.511	2.57e-12	5.31e-11	1.4105	0.792	0.514	1.27e-06	4.34e-86	1.02389	0.947	0.484	1.03e-81	3.01e-156	1.95814	0.963	0.513	7.18e-152	7.07e-19	1.20569	0.843	0.509	1.69e-14	1.06e-190	1.46162	0.975	0.434	2.54e-186	5.31e-11	6.38e-190
Oligodendrocytes	15	FTL	1.23e-10	1.46954	0.95	0.95	2.94e-06	1.55e-08	1.61026	0.962	0.957	0.000369291	2.21e-118	1.575	1	0.98	5.27e-114	4.58e-58	1.02433	0.981	0.989	1.09e-53	1.73e-28	1.40914	0.966	0.986	4.12e-24	4.49e-181	1.47416	1	0.974	1.07e-176	1.55e-08	2.7e-180
Oligodendrocytes	15	SERPINF1	3.47e-07	0.256595	0.2	0.039	0.00828609	1.61e-35	0.783938	0.472	0.06	3.85e-31	5.64e-167	2.25387	0.739	0.154	1.35e-162	0.0263344	0.467256	0.128	0.095	1	2.59e-20	1.0277	0.416	0.116	6.18e-16	6.71e-180	2.20064	0.641	0.155	1.6e-175	0.0263344	4.03e-179
Oligodendrocytes	15	BZW2	7.26e-09	0.712826	0.75	0.391	0.00017327	3.9e-16	1.40964	0.792	0.382	9.32e-12	2.5e-113	1.27042	0.992	0.601	5.96e-109	1.59e-42	0.88022	0.825	0.624	3.79e-38	1.57e-13	0.816441	0.798	0.58	3.76e-09	3.48e-177	1.39083	0.985	0.591	8.3e-173	7.26e-09	2.09e-176
Oligodendrocytes	15	CD63	4.08e-07	0.85876	0.875	0.699	0.00974893	7.63e-08	0.82047	0.811	0.668	0.00182258	1.7e-121	1.50483	1	0.929	4.06e-117	6.76e-66	1.0885	0.919	0.905	1.61e-61	9.62e-28	1.26437	0.933	0.918	2.3e-23	6.94e-177	1.37652	0.995	0.912	1.66e-172	4.08e-07	4.17e-176
Oligodendrocytes	15	GSN	5.22e-24	0.6251	0.5	0.076	1.25e-19	7.26e-22	0.649137	0.566	0.127	1.73e-17	3.11e-32	0.614866	0.657	0.306	7.43e-28	4.08e-176	1.25492	0.781	0.189	9.74e-172	8.52e-30	1.06701	0.787	0.301	2.04e-25	1.42e-133	1.01342	0.79	0.26	3.38e-129	7.26e-22	2.45e-175
Oligodendrocytes	15	SPTBN1	1.07e-12	1.4493	0.725	0.282	2.55e-08	4.04e-05	0.822407	0.509	0.266	0.963786	2.38e-15	0.33769	0.755	0.441	5.69e-11	2.33e-173	2.17138	0.947	0.383	5.55e-169	2.37e-29	1.32738	0.742	0.277	5.66e-25	2.68e-74	0.711463	0.808	0.369	6.4e-70	4.04e-05	1.4e-172
Oligodendrocytes	15	RAB13	1.83e-25	1.71624	0.9	0.283	4.36e-21	3.09e-27	1.97737	0.849	0.293	7.37e-23	4.93e-108	1.08881	0.967	0.409	1.18e-103	4.86e-123	1.35505	0.9	0.441	1.16e-118	5.09e-28	1.27021	0.91	0.499	1.22e-23	4.27e-173	1.10157	0.957	0.365	1.02e-168	1.83e-25	2.56e-172
Oligodendrocytes	15	HES1	5.75e-10	0.973866	0.85	0.365	1.37e-05	3.96e-12	1.61247	0.811	0.41	9.44e-08	8.85e-65	1.19129	0.951	0.502	2.11e-60	6.59e-168	2.46865	0.972	0.449	1.57e-163	1.07e-40	1.92455	0.899	0.362	2.54e-36	1.06e-123	1.46997	0.97	0.502	2.52e-119	5.75e-10	3.96e-167
Oligodendrocytes	15	TIMP1	4.9e-14	0.909612	0.675	0.218	1.17e-09	2.2e-13	0.800917	0.604	0.208	5.26e-09	3.46e-92	1.13105	0.947	0.417	8.27e-88	8.93e-168	2.10464	0.881	0.32	2.13e-163	1.41e-26	1.69467	0.865	0.493	3.36e-22	3.87e-124	1.20147	0.889	0.376	9.24e-120	2.2e-13	5.36e-167
Oligodendrocytes	15	GSTP1	2.11e-06	0.792828	0.825	0.692	0.0504109	3.14e-06	0.735901	0.868	0.681	0.0748779	2.22e-89	1.48897	1	0.854	5.29e-85	7.49e-47	0.782329	0.969	0.888	1.79e-42	5.66e-31	1.07922	0.978	0.917	1.35e-26	8.22e-167	1.73719	0.997	0.855	1.96e-162	3.14e-06	4.93e-166
Oligodendrocytes	15	LMNA	3.85e-08	0.5178	0.625	0.251	0.000918828	4.19e-16	0.674357	0.698	0.245	1e-11	4.65e-114	1.4858	0.984	0.551	1.11e-109	7.19e-141	1.62321	0.831	0.301	1.72e-136	2.97e-43	1.56089	0.843	0.31	7.09e-39	7.39e-165	1.45278	0.967	0.485	1.77e-160	3.85e-08	4.44e-164
Oligodendrocytes	15	GSTO1	3.11e-08	0.615943	0.6	0.255	0.000742571	4.88e-28	1.31084	0.792	0.226	1.17e-23	1.31e-104	1.17166	0.959	0.476	3.14e-100	9.01e-38	0.629326	0.747	0.485	2.15e-33	3.38e-20	0.978137	0.809	0.51	8.06e-16	1.24e-162	1.16018	0.952	0.441	2.95e-158	3.11e-08	7.43e-162
Oligodendrocytes	15	COL4A3BP	4.96e-18	2.02153	0.7	0.23	1.18e-13	1e-12	1.39143	0.585	0.223	2.39e-08	1.4e-53	0.59931	0.841	0.388	3.33e-49	6.18e-159	1.72494	0.841	0.29	1.48e-154	1.82e-30	1.35729	0.719	0.272	4.34e-26	9.51e-149	0.976722	0.896	0.325	2.27e-144	1e-12	3.71e-158
Oligodendrocytes	15	COL4A2	1.16e-11	0.848572	0.675	0.246	2.78e-07	2.11e-06	0.650322	0.491	0.228	0.0502527	1.16e-21	0.439339	0.62	0.304	2.76e-17	5.95e-152	2.02652	0.869	0.335	1.42e-147	1.14e-13	1.04021	0.64	0.33	2.73e-09	4.64e-71	0.74036	0.684	0.28	1.11e-66	2.11e-06	3.57e-151
Oligodendrocytes	15	FTH1	6.73e-05	0.552894	0.975	0.953	1	0.000156463	0.939978	0.962	0.955	1	3.1e-113	2.47378	1	0.987	7.41e-109	4.43e-18	0.336976	0.981	0.991	1.06e-13	1.46e-18	0.770489	0.978	0.989	3.47e-14	1.44e-150	2.10788	1	0.984	3.43e-146	0.000156463	8.62e-150
Oligodendrocytes	15	SPARC	1.3e-20	1.74546	0.95	0.483	3.1e-16	5.22e-23	1.82902	0.906	0.483	1.25e-18	1.9e-52	1.02648	0.988	0.611	4.55e-48	1.01e-148	2.15644	0.966	0.584	2.4e-144	9.32e-28	1.67961	0.955	0.679	2.23e-23	2.99e-139	1.40539	0.997	0.599	7.15e-135	1.3e-20	6.04e-148
Oligodendrocytes	15	BCHE	5.73e-24	1.21801	0.7	0.15	1.37e-19	0.000562315	0.257363	0.396	0.208	1	1.22e-62	0.735716	0.784	0.287	2.92e-58	3.03e-148	1.44613	0.828	0.274	7.24e-144	3.87e-13	0.761071	0.539	0.251	9.25e-09	1.55e-113	0.891535	0.785	0.275	3.7e-109	0.000562315	1.82e-147
Oligodendrocytes	15	VIM	4.81e-05	0.55584	0.975	0.946	1	2.95e-14	1.29573	1	0.921	7.04e-10	6.95e-110	1.80872	1	0.895	1.66e-105	2.06e-82	1.20702	1	0.941	4.92e-78	3.76e-19	1.09565	1	0.957	8.97e-15	4.4e-136	1.31192	1	0.917	1.05e-131	4.81e-05	2.64e-135
Oligodendrocytes	15	COL18A1	1.01e-31	1.58606	0.725	0.135	2.41e-27	3.55e-21	1.24134	0.698	0.203	8.49e-17	3.12e-67	0.772881	0.873	0.343	7.45e-63	5.1e-136	1.29109	0.678	0.181	1.22e-131	1.01e-36	0.914225	0.64	0.168	2.42e-32	3.21e-131	0.971046	0.902	0.349	7.67e-127	3.55e-21	3.06e-135
Oligodendrocytes	15	RRBP1	2.66e-16	1.05274	0.8	0.288	6.35e-12	5.74e-12	1.07136	0.717	0.35	1.37e-07	6.42e-79	0.809089	0.931	0.416	1.53e-74	6.08e-100	1.09775	0.812	0.332	1.45e-95	4.52e-23	0.741422	0.787	0.342	1.08e-18	3.75e-123	0.837774	0.879	0.359	8.95e-119	5.74e-12	2.25e-122
Oligodendrocytes	15	HMG20B	2.5e-16	0.870154	0.725	0.214	5.98e-12	3.14e-12	0.677067	0.604	0.222	7.49e-08	1.19e-47	0.710862	0.935	0.553	2.85e-43	1.39e-74	1.0094	0.819	0.447	3.32e-70	2.28e-17	0.951851	0.73	0.423	5.44e-13	8.75e-120	0.953255	0.917	0.468	2.09e-115	3.14e-12	5.25e-119
Oligodendrocytes	15	RHOC	1.14e-12	0.947294	0.725	0.267	2.72e-08	8.92e-13	1.27311	0.66	0.293	2.13e-08	1.39e-58	0.823894	0.927	0.474	3.31e-54	2.2e-45	0.769363	0.778	0.467	5.26e-41	1.07e-18	0.747807	0.854	0.491	2.56e-14	9.1e-120	0.937851	0.937	0.46	2.17e-115	1.14e-12	5.46e-119
Oligodendrocytes	15	ITGB1	4.83e-15	1.66959	0.925	0.625	1.15e-10	1.65e-11	1.33808	0.774	0.553	3.93e-07	2.12e-21	0.672945	0.976	0.804	5.06e-17	1.26e-107	1.51675	0.922	0.669	3.01e-103	4.53e-23	1.32508	0.921	0.698	1.08e-18	3.97e-55	0.777648	0.98	0.75	9.48e-51	1.65e-11	7.56e-107
Oligodendrocytes	15	IGFBP5	8.02e-16	2.24928	0.625	0.17	1.91e-11	1.79e-17	2.68056	0.585	0.179	4.26e-13	4.13e-44	1.95288	0.792	0.433	9.86e-40	1.37e-83	2.21016	0.681	0.262	3.28e-79	3.35e-27	3.01174	0.73	0.305	8.01e-23	8e-106	2.24362	0.816	0.379	1.91e-101	8.02e-16	4.8e-105
Oligodendrocytes	15	LMO4	8.35e-07	1.00718	0.8	0.495	0.0199328	4.47e-12	1.00558	0.811	0.505	1.07e-07	1.69e-58	1.10639	0.988	0.748	4.04e-54	6.35e-31	1.06976	0.834	0.655	1.52e-26	6.11e-14	1.41574	0.876	0.593	1.46e-09	6.26e-96	1.17732	0.98	0.73	1.49e-91	8.35e-07	3.75e-95
Oligodendrocytes	15	PPIB	8.08e-13	1.20286	0.95	0.647	1.93e-08	3.09e-06	0.654299	0.774	0.61	0.0737598	5.06e-37	0.725195	0.996	0.904	1.21e-32	1.96e-94	1.51631	0.959	0.873	4.67e-90	1.73e-21	1.05918	0.989	0.883	4.12e-17	2.68e-73	0.918988	0.995	0.883	6.41e-69	3.09e-06	1.17e-93
Oligodendrocytes	15	MT-CO2	4e-06	1.20656	0.925	0.778	0.0955784	6.94e-07	1.44517	0.943	0.787	0.0165614	5.02e-32	0.499763	0.996	0.985	1.2e-27	1.88e-47	0.802659	0.991	0.967	4.48e-43	3.46e-10	0.619506	0.989	0.981	8.25e-06	2.9e-70	0.63914	1	0.973	6.92e-66	4e-06	1.74e-69
Oligodendrocytes	15	MT-CO1	7.56e-07	1.39154	0.95	0.835	0.0180596	1.4e-07	1.45473	0.962	0.853	0.0033306	1.11e-28	0.461386	1	0.983	2.64e-24	3.46e-47	0.87867	0.981	0.97	8.25e-43	4.78e-19	0.797078	0.989	0.98	1.14e-14	9.95e-68	0.623037	1	0.981	2.37e-63	7.56e-07	5.97e-67
Oligodendrocytes	15	MT-CYB	2.32e-07	1.23397	0.9	0.755	0.00554206	8.44e-10	1.67599	0.943	0.766	2.01e-05	1.34e-16	0.330525	1	0.982	3.2e-12	1.22e-67	1.00066	0.988	0.961	2.91e-63	1.74e-22	0.882598	1	0.975	4.16e-18	2.2e-64	0.602031	1	0.972	5.25e-60	2.32e-07	7.32e-67
Oligodendrocytes	15	NEAT1	0.0171289	0.493968	0.825	0.673	1	1.54e-10	1.83584	0.868	0.686	3.67e-06	4.89e-54	1.55084	0.873	0.593	1.17e-49	1.84e-66	1.49381	0.866	0.549	4.39e-62	1.54e-16	1.32046	0.944	0.74	3.68e-12	2.08e-41	1.15635	0.838	0.619	4.97e-37	0.0171289	1.1e-65
Oligodendrocytes	15	MT-CO3	3.04e-05	1.20026	0.875	0.717	0.725428	4.01e-08	1.64815	0.925	0.754	0.00095766	3.82e-32	0.556597	0.996	0.984	9.13e-28	4.71e-25	0.680762	0.984	0.961	1.12e-20	1.11e-09	0.638007	1	0.979	2.64e-05	3e-49	0.6857	1	0.977	7.16e-45	3.04e-05	1.8e-48
Neurons	16	TAC1	3.22e-31	1.09678	0.433	0.034	7.7e-27	2.93e-52	0.660167	0.383	0.051	7e-48	4.06e-216	2.26815	0.731	0.109	9.7e-212	1.2e-103	2.05983	0.6	0.106	2.86e-99	5.22e-247	2.61455	0.61	0.038	1.25e-242	0	2.55438	0.801	0.112	0	3.22e-31	0
Neurons	16	GRIA2	3.2e-08	0.60652	0.667	0.222	0.000764052	1.09e-46	1.02637	0.609	0.139	2.59e-42	1.99e-180	1.1464	0.762	0.139	4.75e-176	3.29e-113	0.875193	0.549	0.081	7.85e-109	6.78e-106	0.632768	0.428	0.044	1.62e-101	1.47e-305	1.46111	0.772	0.106	3.5e-301	3.2e-08	8.8e-305
Neurons	16	UBE2QL1	5.06e-79	1.9927	0.9	0.064	1.21e-74	6.49e-252	2.26917	0.852	0.058	1.55e-247	5.4e-135	1.30067	0.983	0.354	1.29e-130	1.95e-247	1.94776	0.867	0.108	4.65e-243	2.69e-271	2.25551	0.931	0.095	6.42e-267	8.59e-157	1.39934	0.965	0.364	2.05e-152	5.06e-79	1.61e-270
Neurons	16	LHX9	2.21e-53	1.99962	0.8	0.069	5.28e-49	1.25e-138	2.19253	0.974	0.145	2.97e-134	1.02e-170	1.74969	0.993	0.289	2.43e-166	1.4e-191	2.09106	0.979	0.171	3.34e-187	5.12e-252	2.57896	0.975	0.11	1.22e-247	2.24e-223	1.97657	1	0.307	5.34e-219	2.21e-53	3.07e-251
Neurons	16	SLC17A6	1.24e-10	0.577214	0.333	0.056	2.95e-06	3.39e-26	0.531345	0.296	0.056	8.09e-22	3.49e-155	0.980461	0.741	0.146	8.32e-151	4.09e-203	1.37505	0.795	0.1	9.76e-199	9.79e-184	1.08668	0.61	0.052	2.34e-179	1.26e-251	1.12588	0.755	0.118	3.02e-247	1.24e-10	7.59e-251
Neurons	16	BARHL2	2.37e-46	0.650594	0.4	0.02	5.66e-42	1.38e-131	1.24109	0.6	0.053	3.3e-127	1.27e-193	1.42911	0.952	0.22	3.03e-189	5.28e-211	1.177	0.621	0.057	1.26e-206	1.6e-237	1.07834	0.591	0.037	3.81e-233	1.24e-219	1.4026	0.934	0.226	2.97e-215	2.37e-46	9.59e-237
Neurons	16	ANK3	4.33e-08	1.23582	0.7	0.325	0.00103411	1.43e-28	1.03902	0.704	0.293	3.42e-24	7.47e-181	1.79767	0.993	0.382	1.78e-176	5.62e-70	1.33907	0.831	0.372	1.34e-65	5.01e-72	1.41825	0.843	0.326	1.2e-67	3.61e-233	1.88037	0.974	0.323	8.62e-229	4.33e-08	2.17e-232
Neurons	16	GPRIN3	1.98e-21	0.786909	0.367	0.037	4.73e-17	7.47e-138	1.25907	0.617	0.053	1.78e-133	7.52e-143	0.891248	0.645	0.127	1.8e-138	3.23e-231	1.04165	0.646	0.056	7.7e-227	2.59e-221	0.874604	0.497	0.027	6.19e-217	2.95e-140	0.850946	0.571	0.118	7.04e-136	1.98e-21	1.94e-230
Neurons	16	POU2F2	1.49e-18	1.70436	0.833	0.237	3.55e-14	8.04e-83	2.11729	0.878	0.213	1.92e-78	2.93e-157	1.51146	0.917	0.266	6.99e-153	2.76e-121	1.36709	0.826	0.184	6.59e-117	3.78e-129	1.92687	0.881	0.191	9.03e-125	2.57e-216	1.94278	0.963	0.302	6.13e-212	1.49e-18	1.54e-215
Neurons	16	CELF4	5.58e-08	0.257735	0.6	0.178	0.00133231	6.73e-34	0.760333	0.574	0.157	1.61e-29	1.3e-160	1.23471	0.89	0.225	3.09e-156	3.8e-106	1.20199	0.779	0.181	9.08e-102	9.31e-87	1.01648	0.711	0.149	2.22e-82	3.17e-216	1.2636	0.879	0.201	7.56e-212	5.58e-08	1.9e-215
Neurons	16	EBF3	1.35e-26	1.2693	0.833	0.151	3.22e-22	3.31e-79	1.35568	0.739	0.133	7.91e-75	1.71e-174	1.17922	0.876	0.209	4.09e-170	9.8e-130	1.50321	0.841	0.184	2.34e-125	2.74e-167	1.34854	0.818	0.109	6.55e-163	2.45e-212	1.09557	0.824	0.176	5.85e-208	1.35e-26	1.47e-211
Neurons	16	ZFHX3	3.49e-10	1.57052	0.833	0.493	8.34e-06	3.09e-68	2.33164	0.983	0.476	7.38e-64	3.05e-163	2.15642	1	0.616	7.27e-159	5.03e-108	2.21592	0.995	0.572	1.2e-103	7.4e-95	2.39489	0.969	0.499	1.77e-90	6.75e-208	2.24909	1	0.576	1.61e-203	3.49e-10	4.05e-207
Neurons	16	NSG2	3.09e-25	1.34067	0.833	0.156	7.38e-21	2.41e-102	1.37679	0.8	0.123	5.74e-98	4.94e-158	1.34626	0.969	0.273	1.18e-153	8.13e-187	1.68051	0.969	0.177	1.94e-182	4.73e-182	1.54436	0.849	0.111	1.13e-177	7.33e-205	1.35288	0.957	0.259	1.75e-200	3.09e-25	4.4e-204
Neurons	16	TTC9B	3.1e-24	0.918874	0.7	0.111	7.4e-20	7.14e-62	0.874527	0.565	0.094	1.71e-57	7.97e-153	0.941752	0.828	0.185	1.9e-148	4.58e-119	1.11705	0.821	0.171	1.09e-114	4.01e-109	0.946641	0.66	0.101	9.58e-105	3.37e-202	1.01108	0.784	0.155	8.04e-198	3.1e-24	2.02e-201
Neurons	16	NRXN1	2.19e-07	0.879708	0.533	0.187	0.0052321	3.09e-22	0.596185	0.522	0.171	7.37e-18	1.23e-149	1.18675	0.879	0.225	2.94e-145	5.79e-83	1.23956	0.81	0.235	1.38e-78	6.75e-106	1.38154	0.799	0.165	1.61e-101	3.87e-199	1.06072	0.801	0.161	9.23e-195	2.19e-07	2.32e-198
Neurons	16	LHX2	1.44e-17	0.888929	0.367	0.043	3.44e-13	7.29e-81	1.18237	0.574	0.075	1.74e-76	5.23e-132	1.26565	0.883	0.233	1.25e-127	1.17e-111	1.12651	0.595	0.094	2.79e-107	5.58e-69	0.750231	0.365	0.048	1.33e-64	1.08e-193	1.5141	0.922	0.233	2.58e-189	1.44e-17	6.49e-193
Neurons	16	INA	1.4e-14	1.34795	0.833	0.26	3.33e-10	2.33e-79	1.67709	0.887	0.21	5.57e-75	7.95e-148	1.61506	1	0.39	1.9e-143	4.3e-108	1.73106	0.99	0.353	1.03e-103	4.03e-101	1.74943	0.987	0.331	9.63e-97	6.05e-182	1.62761	0.997	0.376	1.44e-177	1.4e-14	3.63e-181
Neurons	16	GREM2	6.37e-25	1.39474	0.567	0.078	1.52e-20	1.06e-139	1.47463	0.73	0.076	2.53e-135	1.66e-95	0.808766	0.659	0.168	3.97e-91	4.23e-87	0.701145	0.441	0.066	1.01e-82	3.01e-175	1.35507	0.648	0.064	7.18e-171	2.46e-176	1.18375	0.804	0.19	5.87e-172	6.37e-25	1.47e-175
Neurons	16	PRPH	3.61e-12	0.509578	0.367	0.06	8.63e-08	1.85e-67	1.33036	0.504	0.074	4.43e-63	9.78e-130	1.38521	0.814	0.209	2.33e-125	2.37e-21	0.284049	0.144	0.027	5.65e-17	1.18e-31	0.348598	0.226	0.038	2.81e-27	3.17e-166	1.482	0.867	0.239	7.56e-162	3.61e-12	1.9e-165
Neurons	16	ONECUT2	1.15e-08	0.624962	0.533	0.152	0.000274365	1.32e-38	0.819499	0.609	0.154	3.15e-34	2.58e-80	0.574634	0.507	0.118	6.16e-76	3.68e-70	1.15304	0.667	0.174	8.8e-66	3.08e-75	1.41334	0.597	0.12	7.35e-71	4.56e-165	0.944855	0.634	0.123	1.09e-160	1.15e-08	2.73e-164
Neurons	16	PRKAR2B	2.25e-05	0.545341	0.5	0.197	0.538152	5.57e-38	0.883596	0.617	0.177	1.33e-33	4.23e-135	0.95767	0.886	0.277	1.01e-130	1.1e-63	0.938767	0.836	0.354	2.63e-59	4.5e-67	1.12357	0.786	0.264	1.07e-62	5.57e-163	0.994701	0.81	0.22	1.33e-158	2.25e-05	3.34e-162
Neurons	16	DCX	8.9e-16	1.6256	1	0.414	2.13e-11	2.24e-53	1.4709	0.974	0.395	5.35e-49	6.43e-129	1.44511	0.976	0.398	1.53e-124	7.12e-96	1.66294	0.969	0.395	1.7e-91	6.77e-110	2.29698	0.994	0.356	1.62e-105	6.36e-162	1.44507	1	0.414	1.52e-157	8.9e-16	3.82e-161
Neurons	16	MAPT	1.05e-13	1.05189	0.767	0.22	2.51e-09	4.17e-57	1.13547	0.817	0.225	9.96e-53	1.83e-137	1.0733	0.931	0.297	4.37e-133	7.74e-91	1.18707	0.815	0.228	1.85e-86	9.99e-106	1.28052	0.811	0.173	2.39e-101	2.37e-157	1.04425	0.899	0.276	5.65e-153	1.05e-13	1.42e-156
Neurons	16	EBF1	1.68e-32	1.58241	0.767	0.109	4.02e-28	7.34e-71	1.21147	0.696	0.129	1.75e-66	8.21e-130	1.29377	0.945	0.324	1.96e-125	2.3e-122	1.35258	0.785	0.168	5.5e-118	3.34e-152	1.53534	0.824	0.128	7.98e-148	2.37e-122	1.08302	0.847	0.301	5.65e-118	1.68e-32	2.01e-151
Neurons	16	MAP2	9.22e-11	1.19546	1	0.692	2.2e-06	4.78e-43	1.36071	0.991	0.689	1.14e-38	2.78e-117	1.34493	1	0.819	6.64e-113	6.49e-71	1.27342	0.995	0.766	1.55e-66	7.1e-67	1.46048	0.987	0.683	1.69e-62	1.31e-150	1.48197	1	0.734	3.13e-146	9.22e-11	7.87e-150
Neurons	16	ELAVL4	1.14e-20	1.25344	0.8	0.171	2.73e-16	3.85e-93	0.921336	0.539	0.058	9.19e-89	5.84e-123	1.2491	0.972	0.362	1.39e-118	5.79e-149	1.10038	0.718	0.108	1.38e-144	1.91e-135	1.38095	0.824	0.138	4.56e-131	1.63e-136	1.24491	0.977	0.432	3.9e-132	1.14e-20	3.48e-148
Neurons	16	NSG1	4.49e-14	1.02711	0.833	0.277	1.07e-09	5.33e-40	0.951335	0.748	0.252	1.27e-35	4.44e-111	1.18351	0.99	0.467	1.06e-106	1.77e-92	1.37246	0.928	0.335	4.23e-88	2.31e-108	1.59399	0.912	0.239	5.51e-104	6.62e-149	1.30206	0.986	0.432	1.58e-144	4.49e-14	3.97e-148
Neurons	16	GNG3	1.3e-14	0.812243	0.933	0.285	3.1e-10	9.57e-30	0.790817	0.722	0.274	2.29e-25	1.45e-102	1.07529	0.983	0.433	3.46e-98	7.57e-70	1.00353	0.908	0.337	1.81e-65	6.51e-89	1.21682	0.925	0.265	1.55e-84	1.33e-147	1.2563	0.98	0.384	3.19e-143	1.3e-14	8.01e-147
Neurons	16	CDK5R1	1.78e-09	0.763568	0.533	0.152	4.26e-05	3.64e-45	0.834291	0.565	0.126	8.69e-41	5.63e-120	0.946058	0.838	0.275	1.34e-115	1.77e-78	0.791448	0.667	0.169	4.22e-74	3.05e-67	0.786421	0.597	0.137	7.27e-63	1.11e-145	0.985048	0.775	0.226	2.66e-141	1.78e-09	6.69e-145
Neurons	16	2022-09-06	3.42e-17	1.45159	0.933	0.367	8.18e-13	1.69e-48	1.49476	0.87	0.373	4.03e-44	3.3e-113	1.19777	0.966	0.52	7.88e-109	7.24e-81	1.19444	0.908	0.393	1.73e-76	1.54e-68	1.34066	0.862	0.368	3.68e-64	3.55e-143	1.29029	0.98	0.517	8.47e-139	3.42e-17	2.13e-142
Neurons	16	SEZ6L2	1.45e-11	1.01162	0.833	0.305	3.45e-07	7.15e-32	0.96321	0.765	0.3	1.71e-27	5.7e-120	1.32314	0.997	0.48	1.36e-115	5.34e-51	0.943759	0.897	0.491	1.27e-46	2.41e-46	0.960196	0.874	0.452	5.75e-42	3.85e-143	1.33278	0.986	0.47	9.18e-139	1.45e-11	2.31e-142
Neurons	16	MYCBP2	9.06e-09	0.746775	0.8	0.369	0.000216234	5.11e-24	1.06182	0.713	0.334	1.22e-19	1.48e-131	1.43561	0.979	0.522	3.53e-127	2.73e-68	1.24186	0.897	0.465	6.51e-64	7.59e-65	1.33846	0.881	0.426	1.81e-60	9.1e-143	1.4028	0.939	0.491	2.17e-138	9.06e-09	5.46e-142
Neurons	16	KIF5C	1.75e-13	1.38852	0.967	0.515	4.18e-09	6.95e-39	1.30162	0.904	0.453	1.66e-34	4.61e-103	1.19393	0.997	0.771	1.1e-98	5.36e-77	1.35646	0.985	0.572	1.28e-72	3.04e-71	1.44021	0.987	0.522	7.26e-67	2.46e-142	1.36294	1	0.703	5.86e-138	1.75e-13	1.47e-141
Neurons	16	PID1	1.15e-26	1.0299	0.567	0.07	2.75e-22	5.33e-103	1.14276	0.643	0.08	1.27e-98	4.33e-99	0.82287	0.717	0.215	1.03e-94	2.87e-142	0.956209	0.621	0.085	6.86e-138	1.9e-128	0.991658	0.585	0.071	4.54e-124	3.73e-99	0.764797	0.692	0.225	8.91e-95	1.15e-26	1.72e-141
Neurons	16	THSD7A	5.12e-25	1.29683	0.8	0.15	1.22e-20	1.12e-65	1.24937	0.704	0.145	2.67e-61	1.04e-62	0.774577	0.766	0.306	2.49e-58	8.73e-93	1.31558	0.887	0.292	2.08e-88	3.42e-142	1.78769	0.906	0.18	8.15e-138	2.26e-118	1.04138	0.839	0.298	5.39e-114	5.12e-25	2.05e-141
Neurons	16	RTN1	5.12e-23	1.64932	0.9	0.219	1.22e-18	4.29e-69	1.56503	0.913	0.26	1.02e-64	2.77e-116	1.56859	0.997	0.599	6.62e-112	6.09e-101	1.67745	1	0.395	1.45e-96	7.35e-109	1.99275	1	0.332	1.75e-104	2.35e-141	1.55226	1	0.592	5.62e-137	5.12e-23	1.41e-140
Neurons	16	CPE	1.88e-10	0.939004	0.9	0.435	4.49e-06	3.16e-31	0.888756	0.878	0.446	7.55e-27	8.73e-99	1.10666	0.976	0.607	2.08e-94	2.32e-66	1.14867	0.959	0.53	5.53e-62	1.81e-51	1.1431	0.918	0.498	4.31e-47	1.36e-140	1.25453	0.983	0.507	3.25e-136	1.88e-10	8.17e-140
Neurons	16	RP4-665J23,1	8.32e-13	1.1406	0.667	0.197	1.99e-08	4.98e-50	1.44421	0.809	0.286	1.19e-45	1.03e-139	1.38585	0.952	0.331	2.46e-135	2.26e-69	1.13232	0.779	0.283	5.39e-65	3.78e-82	1.22452	0.742	0.194	9.03e-78	1.07e-112	1.10627	0.957	0.491	2.56e-108	8.32e-13	6.17e-139
Neurons	16	BASP1	9.36e-18	2.19074	1	0.739	2.23e-13	3.46e-58	2.00712	0.991	0.753	8.26e-54	5.29e-109	1.41187	1	0.924	1.26e-104	7.86e-86	1.58011	1	0.919	1.88e-81	5.89e-84	1.96335	1	0.899	1.41e-79	1.89e-136	1.45969	1	0.925	4.51e-132	9.36e-18	1.13e-135
Neurons	16	CRABP1	1.67e-17	2.70987	1	0.626	3.98e-13	3.55e-50	2.20205	0.983	0.742	8.48e-46	6.06e-124	2.09351	1	0.671	1.45e-119	1.19e-69	1.65769	1	0.825	2.83e-65	2.88e-79	2.4281	1	0.795	6.87e-75	1.44e-135	1.89189	1	0.691	3.43e-131	1.67e-17	8.62e-135
Neurons	16	TUBB2B	7.4e-14	1.18628	1	0.924	1.77e-09	1.53e-28	0.897907	0.983	0.917	3.65e-24	6.4e-97	1.12016	1	0.966	1.53e-92	1.41e-61	1.07556	1	0.96	3.36e-57	1.97e-75	1.485	1	0.976	4.71e-71	1.69e-133	1.15639	1	0.971	4.03e-129	7.4e-14	1.01e-132
Neurons	16	LBH	4.97e-09	0.752889	0.7	0.256	0.000118612	5.57e-27	0.856174	0.643	0.252	1.33e-22	2.67e-120	1.09522	0.869	0.302	6.38e-116	1.55e-96	1.25588	0.908	0.308	3.7e-92	1.37e-77	1.06711	0.723	0.182	3.28e-73	2.25e-132	1.05416	0.813	0.272	5.37e-128	4.97e-09	1.35e-131
Neurons	16	RBFOX2	7.64e-16	1.34938	0.967	0.425	1.82e-11	1.34e-38	1.12541	0.87	0.406	3.19e-34	1.15e-116	1.22215	0.997	0.651	2.74e-112	1.3e-74	1.28792	0.969	0.552	3.1e-70	1.94e-73	1.47095	0.95	0.483	4.63e-69	1.88e-131	1.21129	0.986	0.606	4.49e-127	7.64e-16	1.13e-130
Neurons	16	DNER	1.55e-22	1.81578	0.833	0.195	3.69e-18	7.08e-74	1.79385	0.87	0.236	1.69e-69	1.57e-109	1.24758	0.993	0.599	3.75e-105	1.69e-119	1.43898	0.887	0.23	4.03e-115	8.72e-122	1.6025	0.893	0.204	2.08e-117	2.22e-130	1.28117	0.997	0.636	5.31e-126	1.55e-22	1.33e-129
Neurons	16	SCG3	1.25e-15	1.19713	0.833	0.233	2.98e-11	2.3e-71	1.32649	0.861	0.197	5.49e-67	9.5e-121	1.22638	0.993	0.384	2.27e-116	6.5e-101	1.41606	0.964	0.327	1.55e-96	4.77e-91	1.43179	0.937	0.29	1.14e-86	2.85e-129	1.14445	0.922	0.345	6.8e-125	1.25e-15	1.71e-128
Neurons	16	TERF2IP	2.46e-06	0.78761	0.9	0.739	0.0586895	5.99e-18	0.749888	0.93	0.702	1.43e-13	7.85e-108	1.16343	1	0.884	1.87e-103	1.15e-75	1.30689	0.995	0.813	2.75e-71	3.74e-70	1.39905	0.994	0.762	8.94e-66	6.4e-129	1.17478	1	0.832	1.53e-124	2.46e-06	3.84e-128
Neurons	16	GDAP1L1	5.11e-08	0.569262	0.833	0.355	0.00121972	4.38e-19	0.78203	0.67	0.332	1.05e-14	1.97e-91	0.957342	0.907	0.407	4.71e-87	1.82e-60	0.96129	0.882	0.398	4.34e-56	6.1e-47	0.976156	0.843	0.413	1.46e-42	1.77e-122	1.02864	0.902	0.36	4.22e-118	5.11e-08	1.06e-121
Neurons	16	UCHL1	1.33e-11	1.43782	0.9	0.444	3.18e-07	2.71e-23	0.954842	0.843	0.542	6.48e-19	9e-98	1.22822	1	0.798	2.15e-93	5.86e-57	1.14199	0.979	0.719	1.4e-52	3.17e-69	1.56715	0.975	0.618	7.56e-65	4.15e-122	1.22728	1	0.77	9.91e-118	1.33e-11	2.49e-121
Neurons	16	ANK2	6.38e-17	1.2558	0.867	0.27	1.52e-12	5.89e-54	1.65343	0.878	0.307	1.41e-49	2.18e-97	1.06918	0.914	0.468	5.21e-93	4.01e-65	1.16956	0.913	0.445	9.58e-61	1.59e-87	1.48738	0.931	0.336	3.79e-83	2.34e-118	1.19571	0.882	0.423	5.58e-114	6.38e-17	1.4e-117
Neurons	16	STMN2	4.13e-16	1.87725	1	0.421	9.86e-12	1.3e-54	1.72862	0.991	0.397	3.11e-50	5.69e-94	1.44817	1	0.483	1.36e-89	1.09e-79	1.57041	1	0.377	2.61e-75	3.48e-108	2.26353	1	0.292	8.32e-104	1.76e-117	1.51384	1	0.508	4.2e-113	4.13e-16	1.06e-116
Neurons	16	APC	0.000356796	0.505627	0.633	0.351	1	3.46e-24	0.828023	0.713	0.324	8.25e-20	8.98e-90	1.01931	0.924	0.527	2.14e-85	9.31e-61	1.1118	0.903	0.495	2.22e-56	1.32e-49	1.03272	0.868	0.445	3.15e-45	8.53e-116	1.05576	0.896	0.441	2.04e-111	0.000356796	5.12e-115
Neurons	16	KIDINS220	3.84e-08	0.931704	0.833	0.51	0.000916038	9.02e-27	0.952961	0.817	0.441	2.15e-22	1.35e-115	1.28635	0.986	0.634	3.23e-111	1.24e-73	1.34367	0.944	0.558	2.97e-69	7.38e-67	1.29439	0.943	0.491	1.76e-62	3.47e-114	1.10981	0.951	0.56	8.29e-110	3.84e-08	8.13e-115
Neurons	16	CAMK2N1	1.1e-05	0.715027	0.833	0.514	0.263739	1.24e-20	0.770752	0.765	0.411	2.96e-16	1.34e-91	1.03527	0.969	0.59	3.19e-87	9.98e-62	1.07106	0.933	0.503	2.38e-57	7.25e-48	0.977691	0.899	0.47	1.73e-43	1.71e-114	1.18963	0.951	0.571	4.07e-110	1.1e-05	1.02e-113
Neurons	16	DPYSL3	1.03e-14	1.30771	0.967	0.443	2.47e-10	2.84e-51	1.46704	0.93	0.375	6.77e-47	1.91e-101	1.10049	0.969	0.517	4.57e-97	6.82e-69	1.16747	0.923	0.449	1.63e-64	2.84e-78	1.45881	0.943	0.432	6.77e-74	1.37e-113	1.08812	0.945	0.502	3.27e-109	1.03e-14	8.21e-113
Neurons	16	HOXA10	5.87e-16	1.64006	0.9	0.357	1.4e-11	4.4e-84	2.05105	0.861	0.209	1.05e-79	2.93e-41	0.805753	0.866	0.612	7.01e-37	6.53e-112	1.57763	0.769	0.187	1.56e-107	9.95e-82	1.84126	0.868	0.334	2.37e-77	1.32e-92	1.03167	0.965	0.623	3.16e-88	5.87e-16	3.92e-111
Neurons	16	APP	1.4e-12	1.57547	0.967	0.608	3.34e-08	3.14e-56	2.08511	0.948	0.581	7.51e-52	6.22e-94	1.15987	0.997	0.837	1.48e-89	1.5e-87	1.70766	0.99	0.636	3.59e-83	1.76e-75	1.84123	0.975	0.617	4.2e-71	9.34e-112	1.25532	0.991	0.813	2.23e-107	1.4e-12	5.6e-111
Neurons	16	NCAM1	6.06e-15	1.52788	0.967	0.464	1.45e-10	3.92e-54	1.59207	0.957	0.431	9.35e-50	1.13e-95	1.13613	0.99	0.589	2.7e-91	9.07e-90	1.48959	0.974	0.444	2.16e-85	1.03e-101	1.81889	0.981	0.357	2.46e-97	2.2e-111	1.09802	0.994	0.545	5.25e-107	6.06e-15	1.32e-110
Neurons	16	GPC2	4.84e-15	1.37352	0.967	0.411	1.16e-10	9.64e-19	0.643121	0.722	0.372	2.3e-14	1.36e-96	1.146	0.976	0.578	3.25e-92	6.44e-71	1.15688	0.923	0.434	1.54e-66	9.98e-58	1.12463	0.855	0.37	2.38e-53	7.15e-111	1.09175	0.983	0.599	1.71e-106	4.84e-15	4.29e-110
Neurons	16	TTC3	4.96e-07	0.842756	0.967	0.824	0.0118335	1.23e-35	1.12282	0.983	0.757	2.94e-31	6.61e-91	0.914368	1	0.927	1.58e-86	2.28e-75	1.22741	1	0.89	5.43e-71	2.16e-62	1.29408	0.987	0.871	5.15e-58	2.34e-110	0.899575	1	0.918	5.6e-106	4.96e-07	1.41e-109
Neurons	16	MAP1B	7.23e-16	1.73299	1	0.86	1.73e-11	6.82e-46	1.61963	0.991	0.852	1.63e-41	1.01e-97	1.13215	1	0.948	2.41e-93	7.59e-71	1.34813	1	0.914	1.81e-66	1.56e-74	1.63586	1	0.939	3.72e-70	9.94e-110	1.02414	1	0.948	2.37e-105	7.23e-16	5.96e-109
Neurons	16	VCAN	0.00158753	0.588663	0.6	0.401	1	3.48e-24	1.03728	0.73	0.361	8.3e-20	4.83e-76	1.1149	0.928	0.588	1.15e-71	1.72e-42	1.16003	0.831	0.47	4.1e-38	2.01e-25	1.07324	0.78	0.506	4.8e-21	1.49e-108	1.35455	0.937	0.538	3.56e-104	0.00158753	8.95e-108
Neurons	16	RGMB	2e-10	0.864949	0.8	0.315	4.78e-06	8.99e-47	1.20042	0.765	0.24	2.15e-42	9.15e-31	0.436344	0.579	0.28	2.18e-26	5.05e-22	0.759706	0.595	0.322	1.21e-17	8.09e-57	1.14336	0.736	0.266	1.93e-52	2.45e-108	0.939108	0.755	0.259	5.84e-104	2e-10	1.47e-107
Neurons	16	MLLT11	1.75e-13	1.56679	0.967	0.602	4.17e-09	6.73e-38	1.26585	0.948	0.587	1.61e-33	5.29e-87	1.22187	1	0.894	1.26e-82	1.39e-72	1.38495	1	0.705	3.33e-68	5.13e-78	1.78241	1	0.618	1.22e-73	6.8e-107	1.2039	1	0.893	1.62e-102	1.75e-13	4.08e-106
Neurons	16	SYT1	7.71e-10	0.943078	0.8	0.339	1.84e-05	3.31e-31	1.14278	0.878	0.451	7.9e-27	1.93e-75	1.01265	0.962	0.62	4.6e-71	8.76e-81	1.41963	0.99	0.53	2.09e-76	1.03e-78	1.70216	0.969	0.458	2.45e-74	3.54e-106	1.12	0.988	0.668	8.44e-102	7.71e-10	2.12e-105
Neurons	16	PCSK1N	2.45e-16	1.24883	0.967	0.325	5.84e-12	5.15e-32	0.951163	0.783	0.323	1.23e-27	6.41e-66	0.870285	0.997	0.764	1.53e-61	4.06e-98	1.574	0.985	0.368	9.69e-94	1.38e-89	1.73377	1	0.395	3.3e-85	5.87e-106	1.09234	0.997	0.701	1.4e-101	2.45e-16	3.52e-105
Neurons	16	ZC2HC1A	1.1e-07	0.733318	0.767	0.376	0.00262788	2.42e-32	0.882115	0.783	0.314	5.77e-28	6.47e-70	0.82615	0.931	0.587	1.54e-65	2.84e-57	0.98473	0.933	0.552	6.77e-53	6.73e-46	0.9782	0.881	0.525	1.61e-41	6.43e-106	0.986766	0.954	0.547	1.53e-101	1.1e-07	3.86e-105
Neurons	16	CRMP1	1.3e-12	1.65384	0.933	0.537	3.1e-08	1.28e-39	1.3423	0.913	0.484	3.05e-35	1.99e-85	1.04422	0.993	0.661	4.75e-81	3.02e-64	1.08227	0.99	0.687	7.21e-60	4.88e-68	1.398	0.975	0.628	1.16e-63	4.22e-104	1.02929	1	0.678	1.01e-99	1.3e-12	2.53e-103
Neurons	16	STMN4	5.44e-09	1.01469	0.833	0.393	0.000129859	1.01e-23	0.794004	0.809	0.377	2.41e-19	2.32e-78	1.03276	0.959	0.446	5.54e-74	1.4e-69	1.22032	0.928	0.367	3.35e-65	2.65e-79	1.40347	0.95	0.316	6.32e-75	9.13e-103	1.20556	0.937	0.43	2.18e-98	5.44e-09	5.48e-102
Neurons	16	NREP	7.24e-10	1.09014	0.933	0.68	1.73e-05	9.97e-25	1.00349	0.904	0.601	2.38e-20	1.08e-95	1.01601	0.997	0.897	2.59e-91	3.62e-66	1.14747	0.99	0.836	8.64e-62	2.08e-63	1.32737	0.987	0.776	4.96e-59	1.77e-102	0.946384	0.997	0.889	4.22e-98	7.24e-10	1.06e-101
Neurons	16	NRN1	4.22e-26	1.23638	0.633	0.085	1.01e-21	4.33e-39	0.817706	0.565	0.132	1.03e-34	6.07e-69	0.589732	0.631	0.19	1.45e-64	4.16e-40	0.635672	0.605	0.2	9.94e-36	3.16e-73	1.17642	0.629	0.13	7.55e-69	3.19e-102	0.789241	0.669	0.187	7.63e-98	4.22e-26	1.92e-101
Neurons	16	RERE	2.69e-07	0.584784	0.967	0.675	0.00643344	8.82e-25	0.873205	0.922	0.624	2.1e-20	1.22e-80	0.866816	0.993	0.783	2.92e-76	6.12e-68	1.12992	0.964	0.654	1.46e-63	6.35e-46	1.04674	0.912	0.584	1.52e-41	5.14e-102	0.88388	0.994	0.805	1.23e-97	2.69e-07	3.09e-101
Neurons	16	AKAP9	3.53e-05	0.833314	0.867	0.642	0.842335	1.32e-12	0.566581	0.861	0.636	3.16e-08	8e-84	1.06024	0.983	0.8	1.91e-79	3.97e-54	1.0953	0.944	0.719	9.47e-50	2.58e-49	1.15547	0.962	0.699	6.16e-45	7.8e-102	1.01367	0.98	0.773	1.86e-97	3.53e-05	4.68e-101
Neurons	16	TUBA1A	2.45e-12	1.46927	1	0.949	5.86e-08	8.71e-35	1.22417	1	0.958	2.08e-30	1.35e-67	0.76482	1	0.997	3.23e-63	2.99e-53	0.906601	1	0.996	7.14e-49	1.06e-68	1.33004	1	0.994	2.52e-64	2.15e-101	0.862321	1	0.997	5.14e-97	2.45e-12	1.29e-100
Neurons	16	BTBD3	7.4e-09	1.37385	0.633	0.24	0.000176758	1.17e-19	0.884276	0.53	0.219	2.8e-15	6.68e-53	0.939483	0.707	0.382	1.6e-48	3.68e-34	1.24667	0.636	0.33	8.79e-30	1.3e-23	0.919409	0.579	0.288	3.11e-19	2.26e-98	1.29612	0.767	0.354	5.39e-94	7.4e-09	1.35e-97
Neurons	16	PGM2L1	1.88e-12	0.808138	0.767	0.245	4.49e-08	7.22e-39	1.10685	0.73	0.249	1.72e-34	3.42e-72	0.694743	0.821	0.366	8.16e-68	1.38e-59	0.931216	0.764	0.285	3.3e-55	4.85e-69	1.07209	0.748	0.225	1.16e-64	4.71e-97	0.84894	0.801	0.329	1.13e-92	1.88e-12	2.83e-96
Neurons	16	TUBB2A	1.01e-10	1.29565	0.967	0.627	2.42e-06	2e-33	1.23639	0.939	0.598	4.76e-29	1.6e-76	0.918676	1	0.892	3.81e-72	9.28e-57	1.04933	1	0.787	2.21e-52	1.12e-63	1.4235	1	0.788	2.67e-59	2.61e-96	0.913624	1	0.888	6.24e-92	1.01e-10	1.57e-95
Neurons	16	KIF3A	0.000181768	0.551808	0.567	0.292	1	1.83e-32	0.95566	0.739	0.29	4.38e-28	7.1e-77	0.834344	0.931	0.571	1.7e-72	2.87e-58	1.0113	0.877	0.455	6.84e-54	1.32e-50	1.04311	0.824	0.392	3.14e-46	2.94e-96	0.869697	0.922	0.505	7.01e-92	0.000181768	1.76e-95
Neurons	16	CEP170	2.33e-08	1.02568	0.867	0.51	0.000555437	1.04e-31	1.09346	0.887	0.504	2.48e-27	5.72e-94	1.0154	0.986	0.668	1.37e-89	7.63e-67	1.17197	0.954	0.603	1.82e-62	1.21e-58	1.25836	0.918	0.509	2.89e-54	1.2e-94	0.936748	0.945	0.64	2.87e-90	2.33e-08	7.22e-94
Neurons	16	CACNA2D1	4.61e-24	0.852081	0.5	0.059	1.1e-19	2.22e-80	1.22387	0.678	0.11	5.31e-76	1.01e-90	0.721368	0.797	0.281	2.42e-86	1.1e-83	0.79668	0.662	0.153	2.64e-79	1.92e-92	0.970291	0.61	0.105	4.58e-88	3.24e-80	0.650525	0.695	0.263	7.74e-76	4.61e-24	1.15e-91
Neurons	16	NOVA1	0.000157774	0.306695	0.933	0.635	1	2.21e-25	1.06011	0.904	0.533	5.28e-21	5.85e-92	1.25364	1	0.854	1.4e-87	7.64e-83	1.62342	0.969	0.603	1.82e-78	3.17e-44	1.04423	0.925	0.593	7.57e-40	1.77e-87	1.03842	0.997	0.825	4.22e-83	0.000157774	3.51e-91
Neurons	16	DPYSL2	4.66e-09	0.884101	1	0.783	0.000111212	7.84e-22	0.880579	0.93	0.734	1.87e-17	1.12e-69	0.773638	1	0.878	2.68e-65	8.47e-45	0.819881	0.979	0.803	2.02e-40	2.9e-46	0.998224	0.962	0.693	6.91e-42	8.09e-92	0.83841	0.994	0.892	1.93e-87	4.66e-09	4.85e-91
Neurons	16	LSAMP	3.26e-06	0.914599	0.667	0.37	0.0778326	4.55e-42	1.33524	0.835	0.365	1.09e-37	1.33e-50	0.888173	0.821	0.526	3.18e-46	2.33e-12	0.642178	0.662	0.521	5.57e-08	4.77e-44	1.21479	0.836	0.487	1.14e-39	2.08e-89	1.1028	0.888	0.519	4.97e-85	3.26e-06	1.25e-88
Neurons	16	PKIA	2.79e-08	0.849483	0.833	0.438	0.000665922	2.13e-19	0.713067	0.757	0.417	5.08e-15	1.59e-86	0.906128	0.938	0.518	3.8e-82	2.76e-66	1.15565	0.928	0.525	6.58e-62	3.88e-53	1.1143	0.862	0.418	9.25e-49	1.82e-88	0.83888	0.902	0.491	4.34e-84	2.79e-08	1.09e-87
Neurons	16	SEMA6A	4.09e-16	1.08905	0.667	0.157	9.77e-12	4.2e-58	1.30456	0.809	0.238	1e-53	1.71e-73	0.798387	0.89	0.459	4.09e-69	4.98e-57	0.942577	0.81	0.34	1.19e-52	5.78e-87	1.17094	0.786	0.201	1.38e-82	1.04e-77	0.77754	0.793	0.379	2.49e-73	4.09e-16	3.47e-86
Neurons	16	RTN4	1.67e-09	1.06252	0.933	0.77	3.99e-05	5.06e-38	1.19446	0.983	0.761	1.21e-33	2.65e-62	0.7368	1	0.935	6.32e-58	1.05e-68	1.09789	1	0.911	2.51e-64	3.41e-72	1.41797	1	0.899	8.14e-68	2.94e-86	0.821199	1	0.927	7.01e-82	1.67e-09	1.76e-85
Neurons	16	FNBP1L	1.56e-08	0.988058	0.9	0.561	0.000372812	6.87e-33	1.13534	0.939	0.577	1.64e-28	4.4e-85	0.913585	0.99	0.803	1.05e-80	2.52e-58	1.00808	0.99	0.727	6.03e-54	2.36e-64	1.26818	0.975	0.622	5.65e-60	3.26e-74	0.769431	0.96	0.735	7.79e-70	1.56e-08	2.64e-84
Neurons	16	SOX4	1.13e-09	1.17385	0.967	0.884	2.7e-05	3.46e-45	1.50676	1	0.873	8.27e-41	1.1e-70	1.09091	1	0.953	2.63e-66	9.29e-77	1.59884	1	0.921	2.22e-72	1.35e-81	1.91277	1	0.884	3.22e-77	7.42e-83	1.02019	1	0.947	1.77e-78	1.13e-09	4.45e-82
Neurons	16	RAB3C	5.52e-12	1.17588	0.8	0.322	1.32e-07	1.9e-26	0.906583	0.722	0.329	4.54e-22	4.32e-48	0.588689	0.814	0.478	1.03e-43	1.42e-65	1.03102	0.887	0.427	3.4e-61	1.5e-53	1.08784	0.83	0.386	3.58e-49	6.09e-81	0.773996	0.79	0.374	1.45e-76	5.52e-12	3.65e-80
Neurons	16	STMN1	4.56e-11	1.40877	1	0.829	1.09e-06	1.23e-25	0.916939	0.974	0.865	2.93e-21	7.33e-74	0.858132	1	0.985	1.75e-69	2.09e-54	0.85857	1	0.978	4.98e-50	2.71e-68	1.31533	1	0.97	6.48e-64	7.35e-80	0.758295	1	0.983	1.75e-75	4.56e-11	4.41e-79
Neurons	16	SOX11	1.09e-10	1.15029	1	0.79	2.59e-06	1.78e-40	1.48651	0.974	0.764	4.25e-36	4.82e-78	1.1006	1	0.846	1.15e-73	7.65e-70	1.2717	0.995	0.792	1.83e-65	5.38e-70	1.63164	0.987	0.746	1.28e-65	1.59e-74	0.887889	1	0.849	3.8e-70	1.09e-10	2.89e-77
Neurons	16	TMSB10	4.39e-11	1.42504	0.967	0.935	1.05e-06	6.09e-29	1.09879	0.991	0.925	1.45e-24	8.64e-40	0.480532	1	0.993	2.06e-35	2.23e-62	1.03751	1	0.988	5.33e-58	4.26e-77	1.46999	1	0.989	1.02e-72	7.54e-57	0.510411	1	0.99	1.8e-52	4.39e-11	2.56e-76
Neurons	16	POU3F2	1.16e-06	0.765433	0.933	0.565	0.0276837	4.63e-23	0.947604	0.904	0.583	1.1e-18	2.08e-76	1.00466	0.938	0.564	4.97e-72	1.32e-32	0.867932	0.8	0.523	3.16e-28	1.49e-55	1.36061	0.881	0.489	3.56e-51	9.07e-63	0.835507	0.896	0.57	2.16e-58	1.16e-06	1.25e-75
Neurons	16	EPB41	1.63e-12	1.47388	0.933	0.451	3.9e-08	2.36e-43	1.42297	0.887	0.382	5.64e-39	3.39e-62	0.715359	0.907	0.528	8.1e-58	9.02e-29	0.76006	0.805	0.527	2.15e-24	3.03e-37	1.11146	0.811	0.478	7.24e-33	1.18e-68	0.729544	0.844	0.48	2.83e-64	1.63e-12	7.11e-68
Neurons	16	DYNC1H1	2.34e-08	0.938366	0.9	0.554	0.000557632	9.54e-21	0.855303	0.809	0.511	2.28e-16	3.03e-50	0.711576	0.924	0.746	7.24e-46	1.01e-38	0.793517	0.897	0.682	2.42e-34	2.02e-48	1.03955	0.931	0.586	4.82e-44	3.15e-68	0.772073	0.916	0.653	7.51e-64	2.34e-08	1.89e-67
Neurons	16	KLC1	1.19e-14	1.2678	0.967	0.438	2.83e-10	2.01e-38	1.11086	0.887	0.41	4.8e-34	2.15e-61	0.665243	0.948	0.619	5.13e-57	2.32e-47	0.826308	0.887	0.505	5.54e-43	1.9e-56	1.07786	0.887	0.434	4.53e-52	1.85e-66	0.706317	0.922	0.607	4.42e-62	1.19e-14	1.11e-65
Neurons	16	ELAVL3	5.32e-12	1.07693	0.967	0.53	1.27e-07	6.03e-28	1.25506	0.904	0.52	1.44e-23	8.25e-53	0.654667	0.955	0.547	1.97e-48	7.72e-56	0.978041	0.959	0.533	1.84e-51	2.31e-64	1.32033	0.956	0.489	5.52e-60	1.24e-57	0.624238	0.948	0.564	2.97e-53	5.32e-12	1.39e-63
Neurons	16	MAP6	2.3e-12	1.18381	1	0.563	5.49e-08	5.82e-32	1.03238	0.939	0.554	1.39e-27	1.09e-43	0.593771	0.955	0.752	2.6e-39	3.4e-37	0.778101	0.923	0.674	8.11e-33	1.8e-42	0.983508	0.956	0.682	4.3e-38	8.45e-63	0.685436	0.968	0.749	2.02e-58	2.3e-12	5.07e-62
Neurons	16	TAGLN3	5.37e-12	1.20304	0.967	0.48	1.28e-07	1.49e-24	0.905366	0.861	0.47	3.55e-20	2.95e-48	0.488761	0.99	0.743	7.05e-44	1.16e-54	0.902626	1	0.652	2.77e-50	1.66e-57	1.21322	0.994	0.629	3.97e-53	3.73e-49	0.394418	0.991	0.749	8.91e-45	5.37e-12	9.97e-57
Neurons	16	DAAM1	3.75e-06	0.906016	0.9	0.645	0.0895842	1.02e-29	1.18961	0.887	0.559	2.43e-25	1.49e-45	0.582467	0.941	0.728	3.55e-41	2.83e-49	0.900735	0.964	0.66	6.75e-45	5.52e-49	1.14301	0.956	0.648	1.32e-44	2e-49	0.596761	0.937	0.699	4.77e-45	3.75e-06	1.2e-48
Neurons	16	ENC1	0.032072	0.352471	0.4	0.249	1	4.52e-28	0.99003	0.661	0.256	1.08e-23	3.2e-32	0.602902	0.821	0.521	7.65e-28	3.77e-40	1.30373	0.723	0.368	9e-36	9.4e-46	1.40882	0.73	0.311	2.24e-41	6.68e-37	0.597515	0.853	0.569	1.59e-32	0.032072	5.64e-45
Neurons	17	GAD2	0	1.39982	0.633	0.025	0	2.4e-274	0.879096	0.325	0.005	5.74e-270	0	1.90862	0.66	0.003	0	0	1.75471	0.594	0.011	0	0	1.44375	0.703	0.016	0	0	1.4593	0.436	0.003	0	2.4e-274	0
Neurons	17	RP11-82C23,2	0	1.65373	0.759	0.062	0	0	1.54138	0.662	0.026	0	0	2.63306	0.904	0.019	0	0	2.63824	0.807	0.058	0	0	1.88177	0.851	0.045	0	0	2.669	0.872	0.016	0	0	0
Neurons	17	LAMP5	0	2.26003	0.87	0.098	0	0	1.92678	0.7	0.021	0	0	1.86747	0.543	0.011	0	9.63e-255	2.5889	0.733	0.067	2.3e-250	0	2.7457	0.971	0.075	0	0	1.92034	0.544	0.009	0	9.63e-255	0
Neurons	17	LHX1	1.06e-291	2.01128	0.822	0.093	2.53e-287	4.85e-230	1.72798	0.644	0.044	1.16e-225	0	2.23877	0.691	0.012	0	0	1.85369	0.556	0.026	0	1.22e-208	1.04557	0.451	0.025	2.91e-204	0	2.43856	0.624	0.013	0	1.22e-208	0
Neurons	17	SLC32A1	3.9e-276	1.01531	0.567	0.038	9.3e-272	4.25e-176	0.653816	0.375	0.017	1.01e-171	0	1.14469	0.489	0.003	0	0	0.972849	0.439	0.007	0	0	1.20281	0.617	0.006	0	0	0.773456	0.315	0.002	0	4.25e-176	0
Neurons	17	LHX5	3.57e-262	1.2406	0.641	0.057	8.52e-258	9.51e-285	1.11681	0.475	0.015	2.27e-280	0	0.972853	0.511	0.006	0	8.06e-294	1.08926	0.513	0.023	1.92e-289	0	0.915284	0.514	0.017	0	0	0.947466	0.49	0.008	0	3.57e-262	0
Neurons	17	GAD1	2.46e-187	0.842069	0.463	0.039	5.88e-183	5.23e-110	0.702816	0.312	0.021	1.25e-105	0	0.963701	0.436	0.008	0	2.14e-133	0.751093	0.294	0.018	5.1e-129	1.47e-86	0.437878	0.234	0.017	3.51e-82	0	1.07063	0.436	0.01	0	1.47e-86	0
Neurons	17	RP11-445F12,1	1.04e-152	0.712423	0.422	0.041	2.48e-148	2.97e-135	0.487558	0.262	0.01	7.08e-131	0	0.795033	0.404	0.004	0	2.44e-237	0.6495	0.294	0.007	5.82e-233	2.53e-177	0.452331	0.28	0.01	6.05e-173	0	1.25263	0.49	0.003	0	2.97e-135	0
Neurons	17	NRXN3	1.4e-279	1.44162	0.707	0.067	3.35e-275	5.07e-211	1.05452	0.569	0.036	1.21e-206	1.82e-81	0.800623	0.484	0.084	4.34e-77	5.65e-156	0.938879	0.487	0.046	1.35e-151	8.32e-154	0.882102	0.503	0.047	1.99e-149	3.05e-47	0.661177	0.376	0.071	7.29e-43	3.05e-47	8.41e-279
Neurons	17	PCP4	5.43e-25	0.770155	0.241	0.07	1.3e-20	6.34e-95	1.52807	0.375	0.036	1.51e-90	8.55e-121	3.28659	0.404	0.039	2.04e-116	5.09e-52	2.96165	0.353	0.07	1.22e-47	3.38e-55	1.42954	0.309	0.046	8.07e-51	3.73e-252	3.84731	0.577	0.033	8.91e-248	5.43e-25	2.24e-251
Neurons	17	NSG2	5.24e-227	1.4565	0.848	0.127	1.25e-222	2.64e-82	1.08861	0.637	0.122	6.31e-78	1.63e-45	0.895773	0.761	0.291	3.89e-41	4.86e-91	1.32209	0.759	0.183	1.16e-86	2.59e-204	1.61593	0.857	0.109	6.19e-200	5.46e-49	1.18532	0.779	0.276	1.3e-44	1.63e-45	3.15e-226
Neurons	17	CELF4	4.35e-205	1.68935	0.83	0.15	1.04e-200	6.98e-62	1.02694	0.625	0.153	1.67e-57	5.02e-68	1.40441	0.723	0.241	1.2e-63	1.73e-53	0.960767	0.61	0.185	4.13e-49	2.33e-119	1.34124	0.754	0.147	5.57e-115	1.35e-74	1.64764	0.772	0.217	3.22e-70	1.73e-53	2.61e-204
Neurons	17	TTC9B	5.96e-117	0.718037	0.552	0.093	1.42e-112	2.69e-73	0.823951	0.531	0.091	6.41e-69	1.62e-61	0.921008	0.681	0.2	3.86e-57	8.79e-67	0.967239	0.663	0.176	2.1e-62	1.82e-184	1.28737	0.783	0.097	4.35e-180	9.35e-51	0.90545	0.631	0.17	2.23e-46	9.35e-51	1.09e-183
Neurons	17	ELAVL4	6.54e-180	1.70698	0.781	0.145	1.56e-175	1.29e-57	0.893223	0.375	0.059	3.07e-53	6.37e-16	0.534131	0.665	0.381	1.52e-11	1.85e-47	0.933913	0.449	0.115	4.42e-43	1.22e-136	1.33689	0.794	0.137	2.91e-132	9.64e-23	0.731691	0.805	0.446	2.3e-18	6.37e-16	3.92e-179
Neurons	17	RGS4	5.5e-82	0.608629	0.315	0.043	1.31e-77	1.86e-122	0.940631	0.406	0.033	4.44e-118	3.77e-33	0.414375	0.287	0.063	9.01e-29	1.81e-157	1.11194	0.374	0.025	4.32e-153	1.38e-172	0.9834	0.44	0.03	3.29e-168	3.1e-34	0.606334	0.295	0.057	7.41e-30	3.77e-33	8.26e-172
Neurons	17	INA	2.55e-164	1.50467	0.941	0.231	6.09e-160	7.13e-88	1.36223	0.844	0.206	1.7e-83	1.55e-52	1.18002	0.904	0.403	3.69e-48	5.67e-62	1.17477	0.904	0.356	1.35e-57	8.49e-100	1.74378	0.949	0.331	2.03e-95	4.48e-54	1.49164	0.906	0.391	1.07e-49	1.55e-52	1.53e-163
Neurons	17	SCG3	8.28e-164	1.4495	0.893	0.206	1.98e-159	1.16e-91	1.44456	0.831	0.193	2.77e-87	8.85e-52	1.05968	0.883	0.397	2.11e-47	1.1e-66	1.24441	0.866	0.33	2.61e-62	2.49e-95	1.5052	0.914	0.289	5.96e-91	1.53e-57	1.24135	0.926	0.357	3.66e-53	8.85e-52	4.97e-163
Neurons	17	ONECUT1	7.8e-137	1.13279	0.619	0.106	1.86e-132	2.86e-29	0.776782	0.338	0.085	6.82e-25	5.33e-122	0.712058	0.335	0.024	1.27e-117	4.98e-27	0.707967	0.38	0.124	1.19e-22	3.22e-161	1.22602	0.766	0.108	7.69e-157	1.4e-110	1.03842	0.477	0.053	3.35e-106	4.98e-27	1.93e-160
Neurons	17	DNER	1.7e-153	1.37223	0.789	0.17	4.07e-149	1.22e-33	0.784984	0.644	0.237	2.91e-29	1.84e-16	0.56968	0.819	0.611	4.39e-12	9.87e-33	0.758691	0.599	0.238	2.36e-28	1.16e-76	1.16664	0.754	0.206	2.78e-72	1.25e-10	0.454025	0.799	0.647	2.99e-06	1.25e-10	1.02e-152
Neurons	17	NEFM	4.14e-108	1.61476	0.807	0.244	9.87e-104	8.34e-69	2.10499	0.812	0.269	1.99e-64	4.39e-26	1.83079	0.622	0.34	1.05e-21	2.96e-56	2.02803	0.743	0.304	7.06e-52	1.6e-150	3.43318	0.989	0.262	3.82e-146	5.94e-38	1.66981	0.745	0.339	1.42e-33	4.39e-26	9.61e-150
Neurons	17	SEZ6L2	4.62e-147	1.50334	0.93	0.278	1.1e-142	3.69e-55	1.07956	0.825	0.295	8.81e-51	3.07e-61	1.16486	0.947	0.49	7.33e-57	3.68e-48	0.999663	0.877	0.492	8.78e-44	1.17e-64	1.11279	0.92	0.451	2.79e-60	1.36e-57	1.34736	0.953	0.481	3.25e-53	3.68e-48	2.77e-146
Neurons	17	LUZP2	3.54e-143	0.890159	0.341	0.027	8.45e-139	5.03e-135	0.796514	0.362	0.022	1.2e-130	1.96e-61	0.459118	0.218	0.021	4.69e-57	3.91e-65	0.936709	0.348	0.053	9.33e-61	2.58e-58	0.606234	0.24	0.027	6.15e-54	8.12e-124	0.750157	0.309	0.018	1.94e-119	2.58e-58	2.12e-142
Neurons	17	RTN1	4.28e-121	1.13739	0.793	0.195	1.02e-116	1.05e-50	1.01424	0.769	0.259	2.52e-46	3.86e-22	0.949328	0.798	0.611	9.22e-18	6.6e-48	1.00245	0.872	0.399	1.58e-43	1.45e-92	1.66711	0.949	0.331	3.47e-88	5.5e-35	1.13504	0.933	0.601	1.31e-30	3.86e-22	2.57e-120
Neurons	17	STMN2	2.46e-120	1.80861	0.996	0.397	5.88e-116	3.05e-79	1.89076	0.994	0.393	7.28e-75	1.99e-57	1.47472	0.973	0.492	4.74e-53	1.63e-83	1.76642	1	0.378	3.9e-79	2.5e-115	2.20173	1	0.29	5.96e-111	7.61e-59	1.75141	0.993	0.518	1.82e-54	1.99e-57	1.48e-119
Neurons	17	DCX	1.54e-119	1.48493	0.981	0.391	3.67e-115	1.26e-60	1.36165	0.919	0.393	3e-56	5.65e-59	1.10568	0.941	0.408	1.35e-54	1.22e-68	1.47726	0.92	0.397	2.91e-64	4.92e-99	1.88442	0.989	0.355	1.18e-94	1.63e-44	1.09695	0.919	0.427	3.9e-40	1.63e-44	9.23e-119
Neurons	17	KIF5C	2.28e-119	1.70467	0.959	0.496	5.43e-115	4.57e-53	1.36312	0.887	0.45	1.09e-48	1.18e-41	1.19752	0.91	0.777	2.82e-37	2.11e-54	1.29979	0.914	0.574	5.03e-50	8.16e-82	1.60959	0.966	0.522	1.95e-77	1.11e-42	1.29247	0.926	0.711	2.65e-38	1.18e-41	1.37e-118
Neurons	17	GNG3	4.96e-99	1.11443	0.811	0.264	1.18e-94	7.14e-53	1.0662	0.775	0.27	1.7e-48	8.29e-48	1.10187	0.878	0.444	1.98e-43	1.11e-88	1.55426	0.925	0.337	2.65e-84	1.74e-116	1.68051	0.949	0.263	4.16e-112	4.9e-55	1.43314	0.913	0.397	1.17e-50	8.29e-48	1.05e-115
Neurons	17	POU2F2	3.06e-116	1.3288	0.785	0.215	7.31e-112	6.32e-56	1.04927	0.713	0.213	1.51e-51	5.74e-23	0.691268	0.59	0.286	1.37e-18	1.19e-20	0.648079	0.455	0.194	2.84e-16	6.94e-10	0.610091	0.371	0.201	1.66e-05	4.55e-27	0.924391	0.705	0.319	1.09e-22	6.94e-10	1.84e-115
Neurons	17	CPE	7.88e-112	1.43599	0.922	0.415	1.88e-107	5.36e-43	1.19309	0.869	0.443	1.28e-38	1.68e-42	0.970301	0.904	0.615	4.02e-38	3.21e-34	0.981262	0.834	0.534	7.67e-30	1.07e-68	1.2401	0.971	0.496	2.56e-64	4.85e-38	0.991189	0.913	0.518	1.16e-33	3.21e-34	4.73e-111
Neurons	17	MAPT	9.02e-112	0.951368	0.767	0.197	2.15e-107	3.3e-32	0.731609	0.613	0.226	7.89e-28	8.86e-33	0.895207	0.66	0.316	2.12e-28	2.12e-25	0.610276	0.551	0.234	5.05e-21	1.79e-58	0.954185	0.629	0.176	4.27e-54	1.29e-49	1.18638	0.772	0.291	3.09e-45	2.12e-25	5.41e-111
Neurons	17	MAP2	1.38e-109	1.62221	0.996	0.68	3.29e-105	3.1e-57	1.49313	0.994	0.687	7.39e-53	3.99e-39	0.863547	0.957	0.823	9.53e-35	3.18e-40	1.0173	0.952	0.767	7.59e-36	1.62e-59	1.42938	0.971	0.683	3.87e-55	9.44e-43	1.14895	0.973	0.739	2.25e-38	3.99e-39	8.27e-109
Neurons	17	TSPAN7	6.85e-67	0.652925	0.556	0.156	1.64e-62	2.67e-22	0.511302	0.431	0.152	6.38e-18	2.61e-53	1.06157	0.596	0.193	6.22e-49	1.93e-62	0.978863	0.578	0.155	4.62e-58	4.16e-104	1.11586	0.686	0.136	9.92e-100	1.97e-46	0.99687	0.584	0.17	4.71e-42	2.67e-22	2.49e-103
Neurons	17	VSTM2L	7.85e-103	0.833228	0.593	0.132	1.87e-98	1.39e-37	0.71926	0.525	0.157	3.31e-33	7.81e-27	0.87747	0.617	0.346	1.86e-22	1.72e-19	0.567772	0.471	0.222	4.09e-15	2.05e-19	0.550372	0.486	0.236	4.88e-15	3.42e-17	0.82784	0.617	0.366	8.16e-13	3.42e-17	4.71e-102
Neurons	17	LBH	1.62e-101	1.06834	0.763	0.235	3.86e-97	4.06e-33	0.862611	0.625	0.25	9.69e-29	1.97e-38	0.713008	0.734	0.315	4.7e-34	4.14e-35	0.892498	0.684	0.314	9.88e-31	1.26e-38	0.662373	0.554	0.185	3.01e-34	8.79e-22	0.641088	0.611	0.287	2.1e-17	8.79e-22	9.71e-101
[truncated: 273 more rows]
