# Supplementary material for: Glucocerebrosidase is imported into mitochondria and preserves complex I integrity and energy metabolism
Source: Nat Commun. 2023 Apr 6;14:1930. doi: 10.1038/s41467-023-37454-4 (PMC10079970; doi:10.1038/s41467-023-37454-4)
Supplement: Supplementary file 7 — Supplementary Data 4 [file 41467_2023_37454_MOESM7_ESM.xlsx]

## Sheet: DEgenes_L444P-L444P1
gene	p_val	avg_log2FC	pct.1	pct.2	p_val_adj	description	Cluster	Indentity
PEG3	2.37e-109	1.59841	0.661	0	4.97e-105	paternally expressed 3 [Source:HGNC Symbol;Acc:HGNC:8826]	10	Neuronal Dopaminergic 1
NNAT	5.96e-87	-2.0116	0.237	0.885	1.25e-82	neuronatin [Source:HGNC Symbol;Acc:HGNC:7860]	10	Neuronal Dopaminergic 1
CLCN4	8.1e-38	-0.51274	0.032	0.369	1.7e-33	chloride voltage-gated channel 4 [Source:HGNC Symbol;Acc:HGNC:2022]	10	Neuronal Dopaminergic 1
PABPC1	4.83e-35	0.736897	0.915	0.848	1.01e-30	poly(A) binding protein cytoplasmic 1 [Source:HGNC Symbol;Acc:HGNC:8554]	10	Neuronal Dopaminergic 1
ARMCX1	3.03e-32	-0.611864	0.12	0.5	6.35e-28	armadillo repeat containing X-linked 1 [Source:HGNC Symbol;Acc:HGNC:18073]	10	Neuronal Dopaminergic 1
MTRNR2L12	3.49e-31	-0.828175	0.645	0.856	7.32e-27	MT-RNR2 like 12 [Source:HGNC Symbol;Acc:HGNC:37169]	10	Neuronal Dopaminergic 1
TAF9B	2.49e-26	-0.294431	0.005	0.214	5.22e-22	TATA-box binding protein associated factor 9b [Source:HGNC Symbol;Acc:HGNC:17306]	10	Neuronal Dopaminergic 1
PKIB	1.7e-24	0.364028	0.224	0.008	3.57e-20	cAMP-dependent protein kinase inhibitor beta [Source:HGNC Symbol;Acc:HGNC:9018]	10	Neuronal Dopaminergic 1
PCDHB5	1.75e-23	0.413413	0.283	0.035	3.67e-19	protocadherin beta 5 [Source:HGNC Symbol;Acc:HGNC:8690]	10	Neuronal Dopaminergic 1
RBMX	4.24e-22	0.53797	0.975	0.92	8.9e-18	RNA binding motif protein X-linked [Source:HGNC Symbol;Acc:HGNC:9910]	10	Neuronal Dopaminergic 1
NHLH2	7.77e-19	0.488691	0.373	0.11	1.63e-14	nescient helix-loop-helix 2 [Source:HGNC Symbol;Acc:HGNC:7818]	10	Neuronal Dopaminergic 1
HSPA1A	9.97e-18	0.529089	0.514	0.235	2.09e-13	heat shock protein family A (Hsp70) member 1A [Source:HGNC Symbol;Acc:HGNC:5232]	10	Neuronal Dopaminergic 1
LDHA	3.47e-17	1.16792	0.638	0.447	7.29e-13	lactate dehydrogenase A [Source:HGNC Symbol;Acc:HGNC:6535]	10	Neuronal Dopaminergic 1
PABPC4	1.08e-16	0.505869	0.638	0.449	2.27e-12	poly(A) binding protein cytoplasmic 4 [Source:HGNC Symbol;Acc:HGNC:8557]	10	Neuronal Dopaminergic 1
GNPDA1	2.48e-16	-0.319353	0.074	0.297	5.22e-12	glucosamine-6-phosphate deaminase 1 [Source:HGNC Symbol;Acc:HGNC:4417]	10	Neuronal Dopaminergic 1
PRMT2	3.81e-16	0.489165	0.876	0.802	7.99e-12	protein arginine methyltransferase 2 [Source:HGNC Symbol;Acc:HGNC:5186]	10	Neuronal Dopaminergic 1
AP2B1	6.79e-16	0.4197	0.885	0.84	1.42e-11	adaptor related protein complex 2 subunit beta 1 [Source:HGNC Symbol;Acc:HGNC:563]	10	Neuronal Dopaminergic 1
ATP5J2	4.12e-14	0.401951	0.901	0.818	8.64e-10	NA	10	Neuronal Dopaminergic 1
BCYRN1	1.23e-13	1.14603	0.7	0.553	2.58e-09	brain cytoplasmic RNA 1 [Source:HGNC Symbol;Acc:HGNC:1022]	10	Neuronal Dopaminergic 1
HSP90AB1	2.25e-13	0.319173	1	0.987	4.72e-09	heat shock protein 90 alpha family class B member 1 [Source:HGNC Symbol;Acc:HGNC:5258]	10	Neuronal Dopaminergic 1
EMC4	2.99e-13	-0.417447	0.498	0.684	6.28e-09	ER membrane protein complex subunit 4 [Source:HGNC Symbol;Acc:HGNC:28032]	10	Neuronal Dopaminergic 1
TCEAL5	8.22e-13	0.368516	0.168	0.021	1.72e-08	transcription elongation factor A like 5 [Source:HGNC Symbol;Acc:HGNC:22282]	10	Neuronal Dopaminergic 1
TPI1	1.39e-12	0.579039	0.972	0.947	2.92e-08	triosephosphate isomerase 1 [Source:HGNC Symbol;Acc:HGNC:12009]	10	Neuronal Dopaminergic 1
CCNI	4.04e-12	0.341517	0.991	0.984	8.47e-08	cyclin I [Source:HGNC Symbol;Acc:HGNC:1595]	10	Neuronal Dopaminergic 1
MT-ND3	6.29e-12	-0.515518	0.965	0.973	1.32e-07	mitochondrially encoded NADH:ubiquinone oxidoreductase core subunit 3 [Source:HGNC Symbol;Acc:HGNC:7458]	10	Neuronal Dopaminergic 1
SCN3A	1.36e-11	0.523065	0.74	0.556	2.86e-07	sodium voltage-gated channel alpha subunit 3 [Source:HGNC Symbol;Acc:HGNC:10590]	10	Neuronal Dopaminergic 1
MT-CO2	2.74e-11	-0.47621	0.984	0.987	5.74e-07	mitochondrially encoded cytochrome c oxidase II [Source:HGNC Symbol;Acc:HGNC:7421]	10	Neuronal Dopaminergic 1
THOC1	3.64e-11	0.375099	0.366	0.176	7.65e-07	THO complex 1 [Source:HGNC Symbol;Acc:HGNC:19070]	10	Neuronal Dopaminergic 1
DPYSL2	1.04e-10	0.354514	0.968	0.947	2.18e-06	dihydropyrimidinase like 2 [Source:HGNC Symbol;Acc:HGNC:3014]	10	Neuronal Dopaminergic 1
SRSF3	1.31e-10	-0.427199	0.783	0.872	2.75e-06	serine and arginine rich splicing factor 3 [Source:HGNC Symbol;Acc:HGNC:10785]	10	Neuronal Dopaminergic 1
ENO2	2.17e-10	0.503571	0.929	0.874	4.57e-06	enolase 2 [Source:HGNC Symbol;Acc:HGNC:3353]	10	Neuronal Dopaminergic 1
MT-ATP6	2.6e-10	-0.503045	0.975	0.989	5.45e-06	mitochondrially encoded ATP synthase membrane subunit 6 [Source:HGNC Symbol;Acc:HGNC:7414]	10	Neuronal Dopaminergic 1
NMT1	5.96e-10	0.367888	0.631	0.5	1.25e-05	N-myristoyltransferase 1 [Source:HGNC Symbol;Acc:HGNC:7857]	10	Neuronal Dopaminergic 1
TXNIP	1.24e-09	0.564068	0.749	0.567	2.6e-05	thioredoxin interacting protein [Source:HGNC Symbol;Acc:HGNC:16952]	10	Neuronal Dopaminergic 1
FAM162A	1.27e-09	0.794761	0.59	0.463	2.66e-05	family with sequence similarity 162 member A [Source:HGNC Symbol;Acc:HGNC:17865]	10	Neuronal Dopaminergic 1
ENO1	1.51e-09	0.677751	0.873	0.813	3.16e-05	enolase 1 [Source:HGNC Symbol;Acc:HGNC:3350]	10	Neuronal Dopaminergic 1
BLCAP	1.82e-09	0.504033	0.698	0.57	3.82e-05	BLCAP apoptosis inducing factor [Source:HGNC Symbol;Acc:HGNC:1055]	10	Neuronal Dopaminergic 1
MT-ATP8	1.87e-09	0.324671	0.682	0.711	3.93e-05	mitochondrially encoded ATP synthase membrane subunit 8 [Source:HGNC Symbol;Acc:HGNC:7415]	10	Neuronal Dopaminergic 1
CETN3	2.03e-09	0.39718	0.627	0.481	4.25e-05	centrin 3 [Source:HGNC Symbol;Acc:HGNC:1868]	10	Neuronal Dopaminergic 1
TCEAL8	3.76e-09	0.364971	0.717	0.62	7.9e-05	transcription elongation factor A like 8 [Source:HGNC Symbol;Acc:HGNC:28683]	10	Neuronal Dopaminergic 1
BNIP3	4.08e-09	0.64443	0.641	0.508	8.56e-05	BCL2 interacting protein 3 [Source:HGNC Symbol;Acc:HGNC:1084]	10	Neuronal Dopaminergic 1
SYT1	5.93e-09	0.448996	0.938	0.89	0.000124384	synaptotagmin 1 [Source:HGNC Symbol;Acc:HGNC:11509]	10	Neuronal Dopaminergic 1
TLE4	1.34e-08	0.530605	0.694	0.537	0.000281308	TLE family member 4, transcriptional corepressor [Source:HGNC Symbol;Acc:HGNC:11840]	10	Neuronal Dopaminergic 1
POLE4	1.5e-08	-0.394947	0.272	0.444	0.00031445	DNA polymerase epsilon 4, accessory subunit [Source:HGNC Symbol;Acc:HGNC:18755]	10	Neuronal Dopaminergic 1
TMSB4X	1.62e-08	-0.311129	0.995	1	0.000340517	thymosin beta 4 X-linked [Source:HGNC Symbol;Acc:HGNC:11881]	10	Neuronal Dopaminergic 1
EN1	2.19e-08	0.719799	0.454	0.281	0.000459412	engrailed homeobox 1 [Source:HGNC Symbol;Acc:HGNC:3342]	10	Neuronal Dopaminergic 1
TPD52	2.62e-08	0.433606	0.355	0.179	0.000549595	tumor protein D52 [Source:HGNC Symbol;Acc:HGNC:12005]	10	Neuronal Dopaminergic 1
PREPL	4.87e-08	0.325847	0.643	0.57	0.00102232	prolyl endopeptidase like [Source:HGNC Symbol;Acc:HGNC:30228]	10	Neuronal Dopaminergic 1
AUTS2	1.08e-07	-0.436728	0.417	0.532	0.00225727	activator of transcription and developmental regulator AUTS2 [Source:HGNC Symbol;Acc:HGNC:14262]	10	Neuronal Dopaminergic 1
SNCB	1.14e-07	0.286885	0.207	0.075	0.00239815	synuclein beta [Source:HGNC Symbol;Acc:HGNC:11140]	10	Neuronal Dopaminergic 1
PGK1	1.65e-07	0.577498	0.906	0.869	0.00346365	phosphoglycerate kinase 1 [Source:HGNC Symbol;Acc:HGNC:8896]	10	Neuronal Dopaminergic 1
NCBP2	1.66e-07	0.303903	0.76	0.693	0.00349456	nuclear cap binding protein subunit 2 [Source:HGNC Symbol;Acc:HGNC:7659]	10	Neuronal Dopaminergic 1
PDZRN3	1.73e-07	0.35222	0.256	0.128	0.00363191	PDZ domain containing ring finger 3 [Source:HGNC Symbol;Acc:HGNC:17704]	10	Neuronal Dopaminergic 1
FCF1	1.98e-07	0.261768	0.313	0.15	0.00415287	FCF1 rRNA-processing protein [Source:HGNC Symbol;Acc:HGNC:20220]	10	Neuronal Dopaminergic 1
MARCKS	2.09e-07	-0.278293	0.975	0.992	0.00437714	myristoylated alanine rich protein kinase C substrate [Source:HGNC Symbol;Acc:HGNC:6759]	10	Neuronal Dopaminergic 1
RERE	2.81e-07	0.305173	0.88	0.837	0.00590012	arginine-glutamic acid dipeptide repeats [Source:HGNC Symbol;Acc:HGNC:9965]	10	Neuronal Dopaminergic 1
ALDOA	2.81e-07	0.443425	0.889	0.856	0.00590187	aldolase, fructose-bisphosphate A [Source:HGNC Symbol;Acc:HGNC:414]	10	Neuronal Dopaminergic 1
EN2	3.64e-07	0.468099	0.408	0.283	0.0076351	engrailed homeobox 2 [Source:HGNC Symbol;Acc:HGNC:3343]	10	Neuronal Dopaminergic 1
NEAT1	5.27e-07	0.658877	0.571	0.422	0.0110671	nuclear paraspeckle assembly transcript 1 [Source:HGNC Symbol;Acc:HGNC:30815]	10	Neuronal Dopaminergic 1
CKB	6.61e-07	-0.284171	0.968	0.976	0.0138849	creatine kinase B [Source:HGNC Symbol;Acc:HGNC:1991]	10	Neuronal Dopaminergic 1
STC1	7.44e-07	0.391165	0.276	0.128	0.0156225	stanniocalcin 1 [Source:HGNC Symbol;Acc:HGNC:11373]	10	Neuronal Dopaminergic 1
DDIT4	8.68e-07	0.528665	0.539	0.388	0.0182261	DNA damage inducible transcript 4 [Source:HGNC Symbol;Acc:HGNC:24944]	10	Neuronal Dopaminergic 1
PGAM1	9.2e-07	0.376122	0.908	0.872	0.0193188	phosphoglycerate mutase 1 [Source:HGNC Symbol;Acc:HGNC:8888]	10	Neuronal Dopaminergic 1
VIM	9.3e-07	0.665244	0.832	0.727	0.0195193	vimentin [Source:HGNC Symbol;Acc:HGNC:12692]	10	Neuronal Dopaminergic 1
SLC16A3	1.09e-06	0.455428	0.426	0.273	0.0228881	solute carrier family 16 member 3 [Source:HGNC Symbol;Acc:HGNC:10924]	10	Neuronal Dopaminergic 1
CIRBP	1.38e-06	0.30398	0.952	0.936	0.028957	cold inducible RNA binding protein [Source:HGNC Symbol;Acc:HGNC:1982]	10	Neuronal Dopaminergic 1
BNIP3L	1.48e-06	0.336125	0.892	0.829	0.0311116	BCL2 interacting protein 3 like [Source:HGNC Symbol;Acc:HGNC:1085]	10	Neuronal Dopaminergic 1
MDK	1.63e-06	0.366264	0.853	0.783	0.0342773	midkine [Source:HGNC Symbol;Acc:HGNC:6972]	10	Neuronal Dopaminergic 1
SLC25A36	1.73e-06	0.331437	0.79	0.717	0.0363522	solute carrier family 25 member 36 [Source:HGNC Symbol;Acc:HGNC:25554]	10	Neuronal Dopaminergic 1
NRN1	2.29e-06	0.438991	0.76	0.663	0.0481501	neuritin 1 [Source:HGNC Symbol;Acc:HGNC:17972]	10	Neuronal Dopaminergic 1
NNAT	2.94e-69	-1.85617	0.211	0.915	6.17e-65	neuronatin [Source:HGNC Symbol;Acc:HGNC:7860]	13	Neuronal Dopaminergic 2
ARMCX1	8.57e-30	-0.689638	0.061	0.469	1.8e-25	armadillo repeat containing X-linked 1 [Source:HGNC Symbol;Acc:HGNC:18073]	13	Neuronal Dopaminergic 2
PEG3	2.23e-29	0.822232	0.33	0	4.69e-25	paternally expressed 3 [Source:HGNC Symbol;Acc:HGNC:8826]	13	Neuronal Dopaminergic 2
LDHA	1.73e-21	1.05908	0.845	0.638	3.63e-17	lactate dehydrogenase A [Source:HGNC Symbol;Acc:HGNC:6535]	13	Neuronal Dopaminergic 2
RBMX	2.07e-21	0.637802	0.964	0.948	4.34e-17	RNA binding motif protein X-linked [Source:HGNC Symbol;Acc:HGNC:9910]	13	Neuronal Dopaminergic 2
PABPC1	3.24e-20	0.730577	0.945	0.92	6.81e-16	poly(A) binding protein cytoplasmic 1 [Source:HGNC Symbol;Acc:HGNC:8554]	13	Neuronal Dopaminergic 2
CLCN4	2.55e-17	-0.33194	0.019	0.249	5.36e-13	chloride voltage-gated channel 4 [Source:HGNC Symbol;Acc:HGNC:2022]	13	Neuronal Dopaminergic 2
MTRNR2L12	4.08e-16	-0.605702	0.482	0.812	8.56e-12	MT-RNR2 like 12 [Source:HGNC Symbol;Acc:HGNC:37169]	13	Neuronal Dopaminergic 2
EMC4	3.09e-14	-0.519018	0.368	0.69	6.49e-10	ER membrane protein complex subunit 4 [Source:HGNC Symbol;Acc:HGNC:28032]	13	Neuronal Dopaminergic 2
NHLH2	1.83e-13	0.69058	0.404	0.16	3.84e-09	nescient helix-loop-helix 2 [Source:HGNC Symbol;Acc:HGNC:7818]	13	Neuronal Dopaminergic 2
TPI1	6.18e-13	0.411188	0.997	1	1.3e-08	triosephosphate isomerase 1 [Source:HGNC Symbol;Acc:HGNC:12009]	13	Neuronal Dopaminergic 2
GNPDA1	1.17e-12	-0.253102	0.064	0.282	2.45e-08	glucosamine-6-phosphate deaminase 1 [Source:HGNC Symbol;Acc:HGNC:4417]	13	Neuronal Dopaminergic 2
DPYSL2	5.54e-11	0.453542	0.925	0.948	1.16e-06	dihydropyrimidinase like 2 [Source:HGNC Symbol;Acc:HGNC:3014]	13	Neuronal Dopaminergic 2
ATP5J2	1.18e-10	0.45511	0.842	0.728	2.48e-06	NA	13	Neuronal Dopaminergic 2
PRMT2	1.47e-10	0.471372	0.789	0.737	3.09e-06	protein arginine methyltransferase 2 [Source:HGNC Symbol;Acc:HGNC:5186]	13	Neuronal Dopaminergic 2
CBR1	3.19e-10	0.256972	0.141	0.005	6.69e-06	carbonyl reductase 1 [Source:HGNC Symbol;Acc:HGNC:1548]	13	Neuronal Dopaminergic 2
CETN3	4.63e-10	0.461836	0.612	0.559	9.71e-06	centrin 3 [Source:HGNC Symbol;Acc:HGNC:1868]	13	Neuronal Dopaminergic 2
TCEAL8	5.59e-09	0.340834	0.645	0.662	0.000117286	transcription elongation factor A like 8 [Source:HGNC Symbol;Acc:HGNC:28683]	13	Neuronal Dopaminergic 2
METAP2	5.82e-09	0.348624	0.859	0.873	0.000122105	methionyl aminopeptidase 2 [Source:HGNC Symbol;Acc:HGNC:16672]	13	Neuronal Dopaminergic 2
FAM32A	5.9e-09	0.37435	0.74	0.714	0.000123764	family with sequence similarity 32 member A [Source:HGNC Symbol;Acc:HGNC:24563]	13	Neuronal Dopaminergic 2
NMT1	7.16e-09	0.42499	0.634	0.573	0.000150273	N-myristoyltransferase 1 [Source:HGNC Symbol;Acc:HGNC:7857]	13	Neuronal Dopaminergic 2
SLC25A36	1.42e-08	0.302945	0.82	0.869	0.000297572	solute carrier family 25 member 36 [Source:HGNC Symbol;Acc:HGNC:25554]	13	Neuronal Dopaminergic 2
HIST1H4E	1.72e-08	-0.273052	0.078	0.263	0.000361208	histone cluster 1 H4 family member e [Source:HGNC Symbol;Acc:HGNC:4790]	13	Neuronal Dopaminergic 2
HILPDA	1.84e-08	0.611302	0.681	0.582	0.000387113	hypoxia inducible lipid droplet associated [Source:HGNC Symbol;Acc:HGNC:28859]	13	Neuronal Dopaminergic 2
POLE4	2.19e-08	-0.274515	0.102	0.3	0.00045945	DNA polymerase epsilon 4, accessory subunit [Source:HGNC Symbol;Acc:HGNC:18755]	13	Neuronal Dopaminergic 2
7SK.2	2.4e-08	-0.441461	0.681	0.873	0.000504179	NA	13	Neuronal Dopaminergic 2
KLC1	3.1e-08	0.349779	0.789	0.784	0.000650745	kinesin light chain 1 [Source:HGNC Symbol;Acc:HGNC:6387]	13	Neuronal Dopaminergic 2
AP2B1	7.24e-08	0.311652	0.792	0.808	0.00152059	adaptor related protein complex 2 subunit beta 1 [Source:HGNC Symbol;Acc:HGNC:563]	13	Neuronal Dopaminergic 2
BOD1L1	7.37e-08	0.262895	0.776	0.822	0.00154761	biorientation of chromosomes in cell division 1 like 1 [Source:HGNC Symbol;Acc:HGNC:31792]	13	Neuronal Dopaminergic 2
GSTT1	7.97e-08	-0.250253	0.183	0.399	0.00167371	glutathione S-transferase theta 1 [Source:HGNC Symbol;Acc:HGNC:4641]	13	Neuronal Dopaminergic 2
PCDHB5	9.78e-08	0.316264	0.216	0.052	0.00205181	protocadherin beta 5 [Source:HGNC Symbol;Acc:HGNC:8690]	13	Neuronal Dopaminergic 2
SERBP1	1.14e-07	0.2684	0.873	0.915	0.00238422	SERPINE1 mRNA binding protein 1 [Source:HGNC Symbol;Acc:HGNC:17860]	13	Neuronal Dopaminergic 2
RPL27	1.22e-07	-0.339155	0.889	0.977	0.00256935	ribosomal protein L27 [Source:HGNC Symbol;Acc:HGNC:10328]	13	Neuronal Dopaminergic 2
MT-CO2	1.27e-07	-0.67304	0.909	0.962	0.00266246	mitochondrially encoded cytochrome c oxidase II [Source:HGNC Symbol;Acc:HGNC:7421]	13	Neuronal Dopaminergic 2
NDUFAF4	1.35e-07	-0.295888	0.319	0.554	0.0028329	NADH:ubiquinone oxidoreductase complex assembly factor 4 [Source:HGNC Symbol;Acc:HGNC:21034]	13	Neuronal Dopaminergic 2
XCL1	1.75e-07	0.324542	0.202	0.061	0.00366909	X-C motif chemokine ligand 1 [Source:HGNC Symbol;Acc:HGNC:10645]	13	Neuronal Dopaminergic 2
C11orf31	2.91e-07	-0.312582	0.457	0.69	0.00611144	NA	13	Neuronal Dopaminergic 2
C1QL4	3.07e-07	0.365425	0.216	0.07	0.00645353	complement C1q like 4 [Source:HGNC Symbol;Acc:HGNC:31416]	13	Neuronal Dopaminergic 2
AMD1	4.23e-07	0.261414	0.482	0.521	0.00888919	adenosylmethionine decarboxylase 1 [Source:HGNC Symbol;Acc:HGNC:457]	13	Neuronal Dopaminergic 2
SP140L	4.97e-07	0.290414	0.166	0.042	0.0104254	SP140 nuclear body protein like [Source:HGNC Symbol;Acc:HGNC:25105]	13	Neuronal Dopaminergic 2
TAC3	5.84e-07	-0.89395	0.105	0.272	0.0122653	tachykinin 3 [Source:HGNC Symbol;Acc:HGNC:11521]	13	Neuronal Dopaminergic 2
RERE	5.86e-07	0.339481	0.914	0.925	0.0122929	arginine-glutamic acid dipeptide repeats [Source:HGNC Symbol;Acc:HGNC:9965]	13	Neuronal Dopaminergic 2
GAPDH	6.1e-07	0.338491	0.997	1	0.012795	glyceraldehyde-3-phosphate dehydrogenase [Source:HGNC Symbol;Acc:HGNC:4141]	13	Neuronal Dopaminergic 2
SCD	1.09e-06	0.265609	0.374	0.404	0.0229231	stearoyl-CoA desaturase [Source:HGNC Symbol;Acc:HGNC:10571]	13	Neuronal Dopaminergic 2
MT-ATP8	1.72e-06	0.287374	0.479	0.516	0.0360419	mitochondrially encoded ATP synthase membrane subunit 8 [Source:HGNC Symbol;Acc:HGNC:7415]	13	Neuronal Dopaminergic 2
HSPA1A	1.75e-06	0.419742	0.551	0.441	0.0367586	heat shock protein family A (Hsp70) member 1A [Source:HGNC Symbol;Acc:HGNC:5232]	13	Neuronal Dopaminergic 2
ENO2	1.9e-06	0.344137	0.967	0.981	0.0398075	enolase 2 [Source:HGNC Symbol;Acc:HGNC:3353]	13	Neuronal Dopaminergic 2
PABPC4	2.04e-06	0.445151	0.609	0.516	0.0429111	poly(A) binding protein cytoplasmic 4 [Source:HGNC Symbol;Acc:HGNC:8557]	13	Neuronal Dopaminergic 2
GPM6A	2.19e-06	-0.412038	0.391	0.606	0.0460431	glycoprotein M6A [Source:HGNC Symbol;Acc:HGNC:4460]	13	Neuronal Dopaminergic 2
RPL27A	2.26e-06	-0.31535	0.934	0.991	0.0474675	ribosomal protein L27a [Source:HGNC Symbol;Acc:HGNC:10329]	13	Neuronal Dopaminergic 2
NNAT	4.73242e-14	-1.20766	0.238	0.921	9.93334e-10	neuronatin [Source:HGNC Symbol;Acc:HGNC:7860]	17	Neuronal Gabaergic
PEG3	4.85085e-12	1.03097	0.476	0	1.01819e-07	paternally expressed 3 [Source:HGNC Symbol;Acc:HGNC:8826]	17	Neuronal Gabaergic
PEG3	3.00166e-201	1.66802	0.742	0	6.30048e-197	paternally expressed 3 [Source:HGNC Symbol;Acc:HGNC:8826]	4	Neuronal Glutamatergic
NNAT	3.30265e-164	-1.69561	0.25	0.952	6.93225e-160	neuronatin [Source:HGNC Symbol;Acc:HGNC:7860]	4	Neuronal Glutamatergic
CLCN4	1.03217e-75	-0.535418	0.016	0.401	2.16653e-71	chloride voltage-gated channel 4 [Source:HGNC Symbol;Acc:HGNC:2022]	4	Neuronal Glutamatergic
ARMCX1	1.49678e-73	-0.669039	0.106	0.577	3.14174e-69	armadillo repeat containing X-linked 1 [Source:HGNC Symbol;Acc:HGNC:18073]	4	Neuronal Glutamatergic
TAF9B	2.63768e-70	-0.431109	0.003	0.332	5.5365e-66	TATA-box binding protein associated factor 9b [Source:HGNC Symbol;Acc:HGNC:17306]	4	Neuronal Glutamatergic
RBMX	7.98217e-68	0.642634	0.99	0.971	1.67546e-63	RNA binding motif protein X-linked [Source:HGNC Symbol;Acc:HGNC:9910]	4	Neuronal Glutamatergic
NHLH2	4.46752e-63	0.892536	0.593	0.199	9.37732e-59	nescient helix-loop-helix 2 [Source:HGNC Symbol;Acc:HGNC:7818]	4	Neuronal Glutamatergic
REG1A	1.70822e-43	0.33697	0.211	0	3.58554e-39	regenerating family member 1 alpha [Source:HGNC Symbol;Acc:HGNC:9951]	4	Neuronal Glutamatergic
MIMT1	1.37446e-41	0.311718	0.203	0	2.885e-37	MER1 repeat containing imprinted transcript 1 [Source:HGNC Symbol;Acc:HGNC:33464]	4	Neuronal Glutamatergic
NEFM	1.27665e-40	0.919323	0.907	0.743	2.67969e-36	neurofilament medium [Source:HGNC Symbol;Acc:HGNC:7734]	4	Neuronal Glutamatergic
PCDHB5	1.43101e-38	0.419429	0.292	0.036	3.00369e-34	protocadherin beta 5 [Source:HGNC Symbol;Acc:HGNC:8690]	4	Neuronal Glutamatergic
PABPC1	8.16091e-38	0.551138	0.932	0.884	1.71298e-33	poly(A) binding protein cytoplasmic 1 [Source:HGNC Symbol;Acc:HGNC:8554]	4	Neuronal Glutamatergic
GNPDA1	6.91708e-34	-0.3901	0.112	0.409	1.4519e-29	glucosamine-6-phosphate deaminase 1 [Source:HGNC Symbol;Acc:HGNC:4417]	4	Neuronal Glutamatergic
MTRNR2L12	7.4056e-33	-0.643599	0.677	0.865	1.55444e-28	MT-RNR2 like 12 [Source:HGNC Symbol;Acc:HGNC:37169]	4	Neuronal Glutamatergic
POLE4	2.07037e-32	-0.547284	0.317	0.637	4.3457e-28	DNA polymerase epsilon 4, accessory subunit [Source:HGNC Symbol;Acc:HGNC:18755]	4	Neuronal Glutamatergic
DPYSL2	5.69693e-32	0.461441	0.993	0.969	1.19579e-27	dihydropyrimidinase like 2 [Source:HGNC Symbol;Acc:HGNC:3014]	4	Neuronal Glutamatergic
PKIB	1.16277e-31	0.302456	0.223	0.019	2.44066e-27	cAMP-dependent protein kinase inhibitor beta [Source:HGNC Symbol;Acc:HGNC:9018]	4	Neuronal Glutamatergic
PRMT2	8.55967e-29	0.492116	0.89	0.794	1.79667e-24	protein arginine methyltransferase 2 [Source:HGNC Symbol;Acc:HGNC:5186]	4	Neuronal Glutamatergic
hsa-mir-490	6.18759e-28	0.27799	0.209	0.021	1.29878e-23	NA	4	Neuronal Glutamatergic
POU2F2	7.50228e-27	0.555848	0.922	0.891	1.57473e-22	POU class 2 homeobox 2 [Source:HGNC Symbol;Acc:HGNC:9213]	4	Neuronal Glutamatergic
ATP5J2	8.12135e-27	0.440596	0.94	0.855	1.70467e-22	NA	4	Neuronal Glutamatergic
HOXC12	3.09083e-25	-0.542944	0.837	0.959	6.48765e-21	homeobox C12 [Source:HGNC Symbol;Acc:HGNC:5124]	4	Neuronal Glutamatergic
CBX3	3.27779e-25	0.392641	0.979	0.953	6.88009e-21	chromobox 3 [Source:HGNC Symbol;Acc:HGNC:1553]	4	Neuronal Glutamatergic
MT-ND3	2.72744e-24	-0.457926	0.999	0.997	5.7249e-20	mitochondrially encoded NADH:ubiquinone oxidoreductase core subunit 3 [Source:HGNC Symbol;Acc:HGNC:7458]	4	Neuronal Glutamatergic
HOXC13	7.62021e-24	-0.542651	0.399	0.665	1.59948e-19	homeobox C13 [Source:HGNC Symbol;Acc:HGNC:5125]	4	Neuronal Glutamatergic
PTN	8.91906e-24	0.871192	0.671	0.504	1.87211e-19	pleiotrophin [Source:HGNC Symbol;Acc:HGNC:9630]	4	Neuronal Glutamatergic
MT-ATP8	4.50883e-22	0.483638	0.897	0.841	9.46404e-18	mitochondrially encoded ATP synthase membrane subunit 8 [Source:HGNC Symbol;Acc:HGNC:7415]	4	Neuronal Glutamatergic
SCN3A	6.43632e-22	0.417153	0.824	0.772	1.35098e-17	sodium voltage-gated channel alpha subunit 3 [Source:HGNC Symbol;Acc:HGNC:10590]	4	Neuronal Glutamatergic
TLE4	7.21344e-22	0.655062	0.765	0.608	1.5141e-17	TLE family member 4, transcriptional corepressor [Source:HGNC Symbol;Acc:HGNC:11840]	4	Neuronal Glutamatergic
NMT1	1.66657e-21	0.395502	0.662	0.544	3.49812e-17	N-myristoyltransferase 1 [Source:HGNC Symbol;Acc:HGNC:7857]	4	Neuronal Glutamatergic
XCL1	1.21224e-20	0.282199	0.245	0.059	2.54449e-16	X-C motif chemokine ligand 1 [Source:HGNC Symbol;Acc:HGNC:10645]	4	Neuronal Glutamatergic
THOC1	2.17692e-20	0.383745	0.408	0.23	4.56935e-16	THO complex 1 [Source:HGNC Symbol;Acc:HGNC:19070]	4	Neuronal Glutamatergic
GREM2	5.48085e-20	0.536989	0.639	0.48	1.15043e-15	gremlin 2, DAN family BMP antagonist [Source:HGNC Symbol;Acc:HGNC:17655]	4	Neuronal Glutamatergic
ALPK1	7.86819e-20	0.521316	0.297	0.114	1.65153e-15	alpha kinase 1 [Source:HGNC Symbol;Acc:HGNC:20917]	4	Neuronal Glutamatergic
RERE	3.00315e-19	0.368082	0.944	0.933	6.30361e-15	arginine-glutamic acid dipeptide repeats [Source:HGNC Symbol;Acc:HGNC:9965]	4	Neuronal Glutamatergic
EMC4	1.16548e-18	-0.401769	0.536	0.741	2.44634e-14	ER membrane protein complex subunit 4 [Source:HGNC Symbol;Acc:HGNC:28032]	4	Neuronal Glutamatergic
ONECUT1	1.65393e-18	0.330125	0.244	0.069	3.47159e-14	one cut homeobox 1 [Source:HGNC Symbol;Acc:HGNC:8138]	4	Neuronal Glutamatergic
HOXA11	1.93074e-18	0.480395	0.517	0.328	4.05263e-14	homeobox A11 [Source:HGNC Symbol;Acc:HGNC:5101]	4	Neuronal Glutamatergic
PVRL3	2.19078e-18	-0.422768	0.38	0.62	4.59845e-14	NA	4	Neuronal Glutamatergic
CXCL12	3.24863e-17	0.337493	0.181	0.036	6.81888e-13	C-X-C motif chemokine ligand 12 [Source:HGNC Symbol;Acc:HGNC:10672]	4	Neuronal Glutamatergic
PSMD14	7.13486e-17	0.317997	0.818	0.813	1.49761e-12	proteasome 26S subunit, non-ATPase 14 [Source:HGNC Symbol;Acc:HGNC:16889]	4	Neuronal Glutamatergic
CBLN2	7.61512e-17	0.617814	0.413	0.219	1.59841e-12	cerebellin 2 precursor [Source:HGNC Symbol;Acc:HGNC:1544]	4	Neuronal Glutamatergic
VIM	1.32886e-16	0.625743	0.828	0.705	2.78928e-12	vimentin [Source:HGNC Symbol;Acc:HGNC:12692]	4	Neuronal Glutamatergic
MIF	1.35236e-16	-0.383194	0.608	0.796	2.83861e-12	macrophage migration inhibitory factor [Source:HGNC Symbol;Acc:HGNC:7097]	4	Neuronal Glutamatergic
RGMB	1.59751e-16	0.462023	0.568	0.399	3.35316e-12	repulsive guidance molecule BMP co-receptor b [Source:HGNC Symbol;Acc:HGNC:26896]	4	Neuronal Glutamatergic
EPHA4	2.06488e-16	-0.299434	0.219	0.442	4.33417e-12	EPH receptor A4 [Source:HGNC Symbol;Acc:HGNC:3388]	4	Neuronal Glutamatergic
FXR1	2.18134e-16	0.323854	0.931	0.903	4.57863e-12	FMR1 autosomal homolog 1 [Source:HGNC Symbol;Acc:HGNC:4023]	4	Neuronal Glutamatergic
CXXC5	3.92583e-16	0.4291	0.768	0.641	8.24032e-12	CXXC finger protein 5 [Source:HGNC Symbol;Acc:HGNC:26943]	4	Neuronal Glutamatergic
NDP	9.49911e-16	0.323148	0.235	0.093	1.99386e-11	norrin cystine knot growth factor NDP [Source:HGNC Symbol;Acc:HGNC:7678]	4	Neuronal Glutamatergic
HMGCS1	1.64841e-15	0.460149	0.816	0.744	3.46e-11	3-hydroxy-3-methylglutaryl-CoA synthase 1 [Source:HGNC Symbol;Acc:HGNC:5007]	4	Neuronal Glutamatergic
ONECUT2	2.97823e-15	0.460957	0.577	0.47	6.25131e-11	one cut homeobox 2 [Source:HGNC Symbol;Acc:HGNC:8139]	4	Neuronal Glutamatergic
CETN3	3.76318e-15	0.34928	0.639	0.544	7.89892e-11	centrin 3 [Source:HGNC Symbol;Acc:HGNC:1868]	4	Neuronal Glutamatergic
METAP2	4.31351e-15	0.306189	0.932	0.921	9.05405e-11	methionyl aminopeptidase 2 [Source:HGNC Symbol;Acc:HGNC:16672]	4	Neuronal Glutamatergic
TCEAL5	5.7734e-15	0.297321	0.137	0.021	1.21184e-10	transcription elongation factor A like 5 [Source:HGNC Symbol;Acc:HGNC:22282]	4	Neuronal Glutamatergic
RBM8A	7.74148e-15	0.293711	0.891	0.883	1.62494e-10	RNA binding motif protein 8A [Source:HGNC Symbol;Acc:HGNC:9905]	4	Neuronal Glutamatergic
RALYL	8.07102e-15	-0.373587	0.157	0.352	1.69411e-10	RALY RNA binding protein like [Source:HGNC Symbol;Acc:HGNC:27036]	4	Neuronal Glutamatergic
NCBP2	2.98084e-14	0.303534	0.825	0.819	6.25678e-10	nuclear cap binding protein subunit 2 [Source:HGNC Symbol;Acc:HGNC:7659]	4	Neuronal Glutamatergic
AP2B1	5.26429e-14	0.28502	0.884	0.874	1.10498e-09	adaptor related protein complex 2 subunit beta 1 [Source:HGNC Symbol;Acc:HGNC:563]	4	Neuronal Glutamatergic
B3GAT2	5.38747e-14	0.399669	0.512	0.354	1.13083e-09	beta-1,3-glucuronyltransferase 2 [Source:HGNC Symbol;Acc:HGNC:922]	4	Neuronal Glutamatergic
IST1	5.98698e-14	0.328147	0.631	0.522	1.25667e-09	IST1 factor associated with ESCRT-III [Source:HGNC Symbol;Acc:HGNC:28977]	4	Neuronal Glutamatergic
ATP1B1	8.02261e-14	-0.45654	0.965	0.979	1.68395e-09	ATPase Na+/K+ transporting subunit beta 1 [Source:HGNC Symbol;Acc:HGNC:804]	4	Neuronal Glutamatergic
LHFP	1.29759e-13	-0.283724	0.109	0.276	2.72365e-09	NA	4	Neuronal Glutamatergic
C1QL4	1.98676e-13	0.349404	0.285	0.147	4.17022e-09	complement C1q like 4 [Source:HGNC Symbol;Acc:HGNC:31416]	4	Neuronal Glutamatergic
ACAT2	2.3459e-13	0.390447	0.778	0.708	4.92405e-09	acetyl-CoA acetyltransferase 2 [Source:HGNC Symbol;Acc:HGNC:94]	4	Neuronal Glutamatergic
STXBP6	3.22315e-13	0.40403	0.206	0.069	6.76539e-09	syntaxin binding protein 6 [Source:HGNC Symbol;Acc:HGNC:19666]	4	Neuronal Glutamatergic
LDHA	3.59211e-13	0.632662	0.476	0.385	7.53984e-09	lactate dehydrogenase A [Source:HGNC Symbol;Acc:HGNC:6535]	4	Neuronal Glutamatergic
FDFT1	5.89944e-13	0.396397	0.881	0.858	1.23829e-08	farnesyl-diphosphate farnesyltransferase 1 [Source:HGNC Symbol;Acc:HGNC:3629]	4	Neuronal Glutamatergic
FDFT1	5.89944e-13	0.396397	0.881	0.858	1.23829e-08	farnesyl-diphosphate farnesyltransferase 1 [Source:NCBI gene;Acc:2222]	4	Neuronal Glutamatergic
ELMOD1	6.45612e-13	-0.306847	0.17	0.354	1.35514e-08	ELMO domain containing 1 [Source:HGNC Symbol;Acc:HGNC:25334]	4	Neuronal Glutamatergic
MEIS2	8.59299e-13	-0.665374	0.486	0.646	1.80367e-08	Meis homeobox 2 [Source:HGNC Symbol;Acc:HGNC:7001]	4	Neuronal Glutamatergic
ZIC1	9.27299e-13	0.391556	0.317	0.173	1.9464e-08	Zic family member 1 [Source:HGNC Symbol;Acc:HGNC:12872]	4	Neuronal Glutamatergic
HOXA10	1.27904e-12	0.354196	0.896	0.813	2.68471e-08	homeobox A10 [Source:HGNC Symbol;Acc:HGNC:5100]	4	Neuronal Glutamatergic
MAF	1.39701e-12	-0.356589	0.345	0.551	2.93231e-08	MAF bZIP transcription factor [Source:HGNC Symbol;Acc:HGNC:6776]	4	Neuronal Glutamatergic
LRRN1	1.46586e-12	-0.272565	0.181	0.359	3.07683e-08	leucine rich repeat neuronal 1 [Source:HGNC Symbol;Acc:HGNC:20980]	4	Neuronal Glutamatergic
WDR72	1.5481e-12	0.283476	0.536	0.477	3.24945e-08	WD repeat domain 72 [Source:HGNC Symbol;Acc:HGNC:26790]	4	Neuronal Glutamatergic
EBF1	1.66191e-12	-0.439381	0.809	0.907	3.48835e-08	EBF transcription factor 1 [Source:HGNC Symbol;Acc:HGNC:3126]	4	Neuronal Glutamatergic
STAU2	2.17149e-12	0.326585	0.712	0.639	4.55795e-08	staufen double-stranded RNA binding protein 2 [Source:HGNC Symbol;Acc:HGNC:11371]	4	Neuronal Glutamatergic
BLCAP	2.25907e-12	0.299975	0.611	0.556	4.74178e-08	BLCAP apoptosis inducing factor [Source:HGNC Symbol;Acc:HGNC:1055]	4	Neuronal Glutamatergic
TSTD1	2.65635e-12	0.333444	0.441	0.264	5.57567e-08	thiosulfate sulfurtransferase like domain containing 1 [Source:HGNC Symbol;Acc:HGNC:35410]	4	Neuronal Glutamatergic
MPHOSPH6	3.25789e-12	0.30976	0.628	0.544	6.83831e-08	M-phase phosphoprotein 6 [Source:HGNC Symbol;Acc:HGNC:7214]	4	Neuronal Glutamatergic
FAM32A	3.69893e-12	0.305433	0.853	0.815	7.76405e-08	family with sequence similarity 32 member A [Source:HGNC Symbol;Acc:HGNC:24563]	4	Neuronal Glutamatergic
HNRNPM	4.65463e-12	0.274938	0.878	0.902	9.77007e-08	heterogeneous nuclear ribonucleoprotein M [Source:HGNC Symbol;Acc:HGNC:5046]	4	Neuronal Glutamatergic
LY6H	4.71738e-12	-0.345959	0.502	0.698	9.90178e-08	lymphocyte antigen 6 family member H [Source:HGNC Symbol;Acc:HGNC:6728]	4	Neuronal Glutamatergic
H1F0	5.69072e-12	0.369762	0.611	0.516	1.19448e-07	H1 histone family member 0 [Source:HGNC Symbol;Acc:HGNC:4714]	4	Neuronal Glutamatergic
LPAR2	6.48436e-12	0.276948	0.392	0.287	1.36107e-07	lysophosphatidic acid receptor 2 [Source:HGNC Symbol;Acc:HGNC:3168]	4	Neuronal Glutamatergic
TMEM163	7.62323e-12	0.357991	0.703	0.641	1.60012e-07	transmembrane protein 163 [Source:HGNC Symbol;Acc:HGNC:25380]	4	Neuronal Glutamatergic
RAI14	1.09514e-11	0.302924	0.58	0.499	2.2987e-07	retinoic acid induced 14 [Source:HGNC Symbol;Acc:HGNC:14873]	4	Neuronal Glutamatergic
RUNX1T1	1.15281e-11	-0.412503	0.828	0.919	2.41975e-07	RUNX1 partner transcriptional co-repressor 1 [Source:HGNC Symbol;Acc:HGNC:1535]	4	Neuronal Glutamatergic
PRPH	2.92191e-11	0.477167	0.774	0.672	6.1331e-07	peripherin [Source:HGNC Symbol;Acc:HGNC:9461]	4	Neuronal Glutamatergic
TXNIP	5.97204e-11	0.309007	0.573	0.523	1.25353e-06	thioredoxin interacting protein [Source:HGNC Symbol;Acc:HGNC:16952]	4	Neuronal Glutamatergic
BCHE	6.80914e-11	0.364362	0.426	0.295	1.42924e-06	butyrylcholinesterase [Source:HGNC Symbol;Acc:HGNC:983]	4	Neuronal Glutamatergic
SYT1	7.81524e-11	0.30655	0.944	0.938	1.64042e-06	synaptotagmin 1 [Source:HGNC Symbol;Acc:HGNC:11509]	4	Neuronal Glutamatergic
PBX1	8.88219e-11	-0.423569	0.291	0.453	1.86437e-06	PBX homeobox 1 [Source:HGNC Symbol;Acc:HGNC:8632]	4	Neuronal Glutamatergic
RAPGEF5	2.15825e-10	-0.288692	0.523	0.701	4.53017e-06	Rap guanine nucleotide exchange factor 5 [Source:HGNC Symbol;Acc:HGNC:16862]	4	Neuronal Glutamatergic
HSPA1A	3.18068e-10	0.288318	0.441	0.302	6.67625e-06	heat shock protein family A (Hsp70) member 1A [Source:HGNC Symbol;Acc:HGNC:5232]	4	Neuronal Glutamatergic
NLRP1	5.53524e-10	0.275003	0.94	0.921	1.16185e-05	NLR family pyrin domain containing 1 [Source:HGNC Symbol;Acc:HGNC:14374]	4	Neuronal Glutamatergic
SNORA76	6.41532e-10	0.259189	0.376	0.29	1.34658e-05	NA	4	Neuronal Glutamatergic
CCK	8.25266e-10	-0.321095	0.025	0.107	1.73223e-05	cholecystokinin [Source:HGNC Symbol;Acc:HGNC:1569]	4	Neuronal Glutamatergic
PCBP4	8.30261e-10	0.254267	0.746	0.724	1.74272e-05	poly(rC) binding protein 4 [Source:HGNC Symbol;Acc:HGNC:8652]	4	Neuronal Glutamatergic
TMEM97	9.39793e-10	0.263549	0.571	0.52	1.97263e-05	transmembrane protein 97 [Source:HGNC Symbol;Acc:HGNC:28106]	4	Neuronal Glutamatergic
IER2	9.73498e-10	0.365549	0.794	0.748	2.04337e-05	immediate early response 2 [Source:HGNC Symbol;Acc:HGNC:28871]	4	Neuronal Glutamatergic
DNER	1.79913e-09	0.258322	0.975	0.962	3.77638e-05	delta/notch like EGF repeat containing [Source:HGNC Symbol;Acc:HGNC:24456]	4	Neuronal Glutamatergic
MT-ATP6	1.93705e-09	-0.283064	0.996	0.998	4.06587e-05	mitochondrially encoded ATP synthase membrane subunit 6 [Source:HGNC Symbol;Acc:HGNC:7414]	4	Neuronal Glutamatergic
LMO2	2.28916e-09	0.314209	0.604	0.522	4.80495e-05	LIM domain only 2 [Source:HGNC Symbol;Acc:HGNC:6642]	4	Neuronal Glutamatergic
OLIG3	2.46182e-09	0.311023	0.317	0.23	5.16736e-05	oligodendrocyte transcription factor 3 [Source:HGNC Symbol;Acc:HGNC:18003]	4	Neuronal Glutamatergic
ELMO1	2.83493e-09	0.271685	0.419	0.304	5.95052e-05	engulfment and cell motility 1 [Source:HGNC Symbol;Acc:HGNC:16286]	4	Neuronal Glutamatergic
ELAVL4	2.83926e-09	0.25216	0.928	0.91	5.95961e-05	ELAV like RNA binding protein 4 [Source:HGNC Symbol;Acc:HGNC:3315]	4	Neuronal Glutamatergic
RPL27A	3.34519e-09	-0.26437	0.962	0.978	7.02155e-05	ribosomal protein L27a [Source:HGNC Symbol;Acc:HGNC:10329]	4	Neuronal Glutamatergic
BCYRN1	1.17061e-08	0.702094	0.579	0.546	0.000245712	brain cytoplasmic RNA 1 [Source:HGNC Symbol;Acc:HGNC:1022]	4	Neuronal Glutamatergic
RND3	2.03004e-08	0.334165	0.893	0.826	0.000426106	Rho family GTPase 3 [Source:HGNC Symbol;Acc:HGNC:671]	4	Neuronal Glutamatergic
CDH7	2.14134e-08	0.340469	0.286	0.187	0.000449466	cadherin 7 [Source:HGNC Symbol;Acc:HGNC:1766]	4	Neuronal Glutamatergic
LHX9	3.78306e-08	0.352495	0.927	0.903	0.000794065	LIM homeobox 9 [Source:HGNC Symbol;Acc:HGNC:14222]	4	Neuronal Glutamatergic
TPI1	4.13368e-08	0.347368	0.957	0.96	0.00086766	triosephosphate isomerase 1 [Source:HGNC Symbol;Acc:HGNC:12009]	4	Neuronal Glutamatergic
FDPS	4.41973e-08	0.253796	0.812	0.793	0.000927702	farnesyl diphosphate synthase [Source:HGNC Symbol;Acc:HGNC:3631]	4	Neuronal Glutamatergic
NPY1R	5.04241e-08	0.301019	0.374	0.287	0.0010584	neuropeptide Y receptor Y1 [Source:HGNC Symbol;Acc:HGNC:7956]	4	Neuronal Glutamatergic
SCML4	5.28186e-08	-0.260591	0.244	0.396	0.00110866	Scm polycomb group protein like 4 [Source:HGNC Symbol;Acc:HGNC:21397]	4	Neuronal Glutamatergic
PDZRN3	5.75813e-08	0.288177	0.529	0.44	0.00120863	PDZ domain containing ring finger 3 [Source:HGNC Symbol;Acc:HGNC:17704]	4	Neuronal Glutamatergic
ZNF503	7.4521e-08	0.281026	0.883	0.889	0.0015642	zinc finger protein 503 [Source:HGNC Symbol;Acc:HGNC:23589]	4	Neuronal Glutamatergic
TSHZ2	8.2478e-08	-0.303087	0.552	0.703	0.00173121	teashirt zinc finger homeobox 2 [Source:HGNC Symbol;Acc:HGNC:13010]	4	Neuronal Glutamatergic
NRXN1	9.37248e-08	-0.281319	0.783	0.881	0.00196728	neurexin 1 [Source:HGNC Symbol;Acc:HGNC:8008]	4	Neuronal Glutamatergic
NOVA1	9.69294e-08	-0.2737	0.985	0.979	0.00203455	NOVA alternative splicing regulator 1 [Source:HGNC Symbol;Acc:HGNC:7886]	4	Neuronal Glutamatergic
MT-CO2	9.84883e-08	-0.267022	0.999	0.998	0.00206727	mitochondrially encoded cytochrome c oxidase II [Source:HGNC Symbol;Acc:HGNC:7421]	4	Neuronal Glutamatergic
PENK	1.17054e-07	-0.411082	0.054	0.149	0.00245696	proenkephalin [Source:HGNC Symbol;Acc:HGNC:8831]	4	Neuronal Glutamatergic
GNG5	1.23827e-07	0.35436	0.564	0.425	0.00259912	G protein subunit gamma 5 [Source:HGNC Symbol;Acc:HGNC:4408]	4	Neuronal Glutamatergic
MSMO1	1.8473e-07	0.301712	0.781	0.708	0.00387748	methylsterol monooxygenase 1 [Source:HGNC Symbol;Acc:HGNC:10545]	4	Neuronal Glutamatergic
GRIA2	3.50608e-07	0.269158	0.727	0.724	0.00735926	glutamate ionotropic receptor AMPA type subunit 2 [Source:HGNC Symbol;Acc:HGNC:4572]	4	Neuronal Glutamatergic
ARL4D	5.41528e-07	0.264695	0.349	0.268	0.0113667	ADP ribosylation factor like GTPase 4D [Source:HGNC Symbol;Acc:HGNC:656]	4	Neuronal Glutamatergic
ENO1	1.16913e-06	0.341244	0.803	0.788	0.0245401	enolase 1 [Source:HGNC Symbol;Acc:HGNC:3350]	4	Neuronal Glutamatergic
CDH2	1.17814e-06	-0.290388	0.858	0.915	0.0247292	cadherin 2 [Source:HGNC Symbol;Acc:HGNC:1759]	4	Neuronal Glutamatergic
HOXB9	1.30182e-06	0.294375	0.542	0.459	0.0273251	homeobox B9 [Source:HGNC Symbol;Acc:HGNC:5120]	4	Neuronal Glutamatergic
DDIT4	1.39078e-06	0.263503	0.367	0.292	0.0291925	DNA damage inducible transcript 4 [Source:HGNC Symbol;Acc:HGNC:24944]	4	Neuronal Glutamatergic
NNAT	8.39489e-192	-1.69199	0.239	0.945	1.76209e-187	neuronatin [Source:HGNC Symbol;Acc:HGNC:7860]	1	Neurons
ARMCX1	1.02896e-82	-0.640374	0.102	0.552	2.15978e-78	armadillo repeat containing X-linked 1 [Source:HGNC Symbol;Acc:HGNC:18073]	1	Neurons
RBMX	1.3288e-79	0.649189	0.99	0.985	2.78915e-75	RNA binding motif protein X-linked [Source:HGNC Symbol;Acc:HGNC:9910]	1	Neurons
TAF9B	6.81201e-75	-0.371762	0.001	0.282	1.42984e-70	TATA-box binding protein associated factor 9b [Source:HGNC Symbol;Acc:HGNC:17306]	1	Neurons
NHLH2	9.73269e-67	0.848119	0.639	0.264	2.04289e-62	nescient helix-loop-helix 2 [Source:HGNC Symbol;Acc:HGNC:7818]	1	Neurons
CLCN4	2.68264e-55	-0.325991	0.022	0.29	5.63086e-51	chloride voltage-gated channel 4 [Source:HGNC Symbol;Acc:HGNC:2022]	1	Neurons
MTRNR2L12	3.09512e-52	-0.657345	0.701	0.919	6.49665e-48	MT-RNR2 like 12 [Source:HGNC Symbol;Acc:HGNC:37169]	1	Neurons
PEG3	1.03524e-47	0.338995	0.205	0	2.17297e-43	paternally expressed 3 [Source:HGNC Symbol;Acc:HGNC:8826]	1	Neurons
GNPDA1	5.56677e-46	-0.359591	0.075	0.371	1.16847e-41	glucosamine-6-phosphate deaminase 1 [Source:HGNC Symbol;Acc:HGNC:4417]	1	Neurons
MT-ND3	2.90588e-38	-0.516264	0.994	1	6.09945e-34	mitochondrially encoded NADH:ubiquinone oxidoreductase core subunit 3 [Source:HGNC Symbol;Acc:HGNC:7458]	1	Neurons
EMC4	8.69651e-38	-0.490001	0.491	0.791	1.8254e-33	ER membrane protein complex subunit 4 [Source:HGNC Symbol;Acc:HGNC:28032]	1	Neurons
PCDHB5	8.47155e-37	0.396566	0.295	0.053	1.77818e-32	protocadherin beta 5 [Source:HGNC Symbol;Acc:HGNC:8690]	1	Neurons
PABPC1	1.32596e-34	0.499996	0.942	0.908	2.78319e-30	poly(A) binding protein cytoplasmic 1 [Source:HGNC Symbol;Acc:HGNC:8554]	1	Neurons
MT-ATP8	1.08041e-29	0.494046	0.875	0.866	2.26778e-25	mitochondrially encoded ATP synthase membrane subunit 8 [Source:HGNC Symbol;Acc:HGNC:7415]	1	Neurons
CETN3	4.58591e-29	0.415338	0.641	0.557	9.62583e-25	centrin 3 [Source:HGNC Symbol;Acc:HGNC:1868]	1	Neurons
POU2F2	7.63059e-27	0.555865	0.798	0.741	1.60166e-22	POU class 2 homeobox 2 [Source:HGNC Symbol;Acc:HGNC:9213]	1	Neurons
HSPA1A	2.8374e-26	0.455842	0.484	0.259	5.9557e-22	heat shock protein family A (Hsp70) member 1A [Source:HGNC Symbol;Acc:HGNC:5232]	1	Neurons
PLXDC2	5.30673e-25	-0.318747	0.038	0.206	1.11388e-20	plexin domain containing 2 [Source:HGNC Symbol;Acc:HGNC:21013]	1	Neurons
XCL1	9.90562e-25	0.293019	0.211	0.047	2.07919e-20	X-C motif chemokine ligand 1 [Source:HGNC Symbol;Acc:HGNC:10645]	1	Neurons
7SK.2	7.12375e-24	-0.45382	0.565	0.791	1.49527e-19	NA	1	Neurons
SOX4	1.04918e-23	-0.263443	1	1	2.20222e-19	SRY-box transcription factor 4 [Source:HGNC Symbol;Acc:HGNC:11200]	1	Neurons
COTL1	1.10016e-23	0.450951	0.935	0.89	2.30924e-19	coactosin like F-actin binding protein 1 [Source:HGNC Symbol;Acc:HGNC:18304]	1	Neurons
NMT1	1.99577e-23	0.368052	0.64	0.549	4.18912e-19	N-myristoyltransferase 1 [Source:HGNC Symbol;Acc:HGNC:7857]	1	Neurons
ATP5J2	4.114e-23	0.350046	0.904	0.869	8.63528e-19	NA	1	Neurons
PRMT2	1.39149e-22	0.401437	0.856	0.783	2.92073e-18	protein arginine methyltransferase 2 [Source:HGNC Symbol;Acc:HGNC:5186]	1	Neurons
MPHOSPH6	2.82124e-22	0.384344	0.646	0.563	5.92179e-18	M-phase phosphoprotein 6 [Source:HGNC Symbol;Acc:HGNC:7214]	1	Neurons
THOC1	2.79604e-21	0.351709	0.405	0.252	5.86888e-17	THO complex 1 [Source:HGNC Symbol;Acc:HGNC:19070]	1	Neurons
FDFT1	3.36028e-21	0.401279	0.939	0.934	7.05323e-17	farnesyl-diphosphate farnesyltransferase 1 [Source:HGNC Symbol;Acc:HGNC:3629]	1	Neurons
FDFT1	3.36028e-21	0.401279	0.939	0.934	7.05323e-17	farnesyl-diphosphate farnesyltransferase 1 [Source:NCBI gene;Acc:2222]	1	Neurons
LPAR2	1.4304e-20	0.350873	0.529	0.426	3.0024e-16	lysophosphatidic acid receptor 2 [Source:HGNC Symbol;Acc:HGNC:3168]	1	Neurons
PABPC4	1.95782e-20	0.359147	0.637	0.553	4.10947e-16	poly(A) binding protein cytoplasmic 4 [Source:HGNC Symbol;Acc:HGNC:8557]	1	Neurons
MT-ATP6	1.89924e-19	-0.378034	0.997	1	3.98651e-15	mitochondrially encoded ATP synthase membrane subunit 6 [Source:HGNC Symbol;Acc:HGNC:7414]	1	Neurons
DPYSL2	2.77605e-19	0.346517	0.984	0.984	5.82692e-15	dihydropyrimidinase like 2 [Source:HGNC Symbol;Acc:HGNC:3014]	1	Neurons
CBX3	3.54697e-19	0.317585	0.982	0.984	7.44509e-15	chromobox 3 [Source:HGNC Symbol;Acc:HGNC:1553]	1	Neurons
PSMC1	4.16308e-19	0.3477	0.772	0.725	8.7383e-15	proteasome 26S subunit, ATPase 1 [Source:HGNC Symbol;Acc:HGNC:9547]	1	Neurons
SCD5	2.49849e-18	-0.361606	0.306	0.529	5.24433e-14	stearoyl-CoA desaturase 5 [Source:HGNC Symbol;Acc:HGNC:21088]	1	Neurons
NPTX2	1.68403e-17	-0.294055	0.165	0.361	3.53477e-13	neuronal pentraxin 2 [Source:HGNC Symbol;Acc:HGNC:7953]	1	Neurons
PSMD14	2.35566e-17	0.307917	0.81	0.767	4.94452e-13	proteasome 26S subunit, non-ATPase 14 [Source:HGNC Symbol;Acc:HGNC:16889]	1	Neurons
MIF	5.59154e-17	-0.302453	0.509	0.723	1.17366e-12	macrophage migration inhibitory factor [Source:HGNC Symbol;Acc:HGNC:7097]	1	Neurons
RBM8A	7.72642e-17	0.284735	0.909	0.908	1.62178e-12	RNA binding motif protein 8A [Source:HGNC Symbol;Acc:HGNC:9905]	1	Neurons
TPI1	8.33828e-17	0.346643	0.98	0.969	1.7502e-12	triosephosphate isomerase 1 [Source:HGNC Symbol;Acc:HGNC:12009]	1	Neurons
ID4	8.77724e-17	-0.513501	0.406	0.617	1.84234e-12	inhibitor of DNA binding 4, HLH protein [Source:HGNC Symbol;Acc:HGNC:5363]	1	Neurons
TCEAL8	9.15283e-17	0.295843	0.69	0.638	1.92118e-12	transcription elongation factor A like 8 [Source:HGNC Symbol;Acc:HGNC:28683]	1	Neurons
RERE	2.43349e-16	0.319454	0.96	0.939	5.10789e-12	arginine-glutamic acid dipeptide repeats [Source:HGNC Symbol;Acc:HGNC:9965]	1	Neurons
RBM39	2.99404e-16	-0.273669	0.912	0.976	6.28449e-12	RNA binding motif protein 39 [Source:HGNC Symbol;Acc:HGNC:15923]	1	Neurons
CHST8	1.54564e-15	-0.290205	0.36	0.573	3.24431e-11	carbohydrate sulfotransferase 8 [Source:HGNC Symbol;Acc:HGNC:15993]	1	Neurons
MT-CO2	1.58902e-15	-0.322524	0.999	0.998	3.33534e-11	mitochondrially encoded cytochrome c oxidase II [Source:HGNC Symbol;Acc:HGNC:7421]	1	Neurons
AP2B1	2.59185e-15	0.286263	0.853	0.819	5.4403e-11	adaptor related protein complex 2 subunit beta 1 [Source:HGNC Symbol;Acc:HGNC:563]	1	Neurons
FAM32A	4.62394e-15	0.303581	0.883	0.866	9.70566e-11	family with sequence similarity 32 member A [Source:HGNC Symbol;Acc:HGNC:24563]	1	Neurons
H1F0	7.66674e-15	0.374263	0.575	0.469	1.60925e-10	H1 histone family member 0 [Source:HGNC Symbol;Acc:HGNC:4714]	1	Neurons
LINC00461	1.33698e-14	-0.284487	0.382	0.587	2.80633e-10	long intergenic non-protein coding RNA 461 [Source:HGNC Symbol;Acc:HGNC:42810]	1	Neurons
SF1	3.97099e-14	-0.261055	0.838	0.939	8.33511e-10	splicing factor 1 [Source:HGNC Symbol;Acc:HGNC:12950]	1	Neurons
CRLF1	4.05787e-14	-0.269562	0.21	0.393	8.51746e-10	cytokine receptor like factor 1 [Source:HGNC Symbol;Acc:HGNC:2364]	1	Neurons
RPL27A	5.61287e-14	-0.272625	0.971	0.992	1.17814e-09	ribosomal protein L27a [Source:HGNC Symbol;Acc:HGNC:10329]	1	Neurons
TNPO1	7.73835e-14	-0.29382	0.639	0.812	1.62428e-09	transportin 1 [Source:HGNC Symbol;Acc:HGNC:6401]	1	Neurons
RBM25	1.09449e-13	0.290405	0.887	0.877	2.29732e-09	RNA binding motif protein 25 [Source:HGNC Symbol;Acc:HGNC:23244]	1	Neurons
MAP6	1.54881e-13	0.256882	0.947	0.955	3.25096e-09	microtubule associated protein 6 [Source:HGNC Symbol;Acc:HGNC:6868]	1	Neurons
TMEM97	1.81204e-13	0.346498	0.929	0.903	3.80347e-09	transmembrane protein 97 [Source:HGNC Symbol;Acc:HGNC:28106]	1	Neurons
C1QL4	1.86578e-13	0.268932	0.2	0.078	3.91628e-09	complement C1q like 4 [Source:HGNC Symbol;Acc:HGNC:31416]	1	Neurons
UBE2E3	2.32644e-13	0.288658	0.923	0.926	4.8832e-09	ubiquitin conjugating enzyme E2 E3 [Source:HGNC Symbol;Acc:HGNC:12479]	1	Neurons
SRSF5	3.73124e-13	-0.262798	0.832	0.93	7.83187e-09	serine and arginine rich splicing factor 5 [Source:HGNC Symbol;Acc:HGNC:10787]	1	Neurons
ACAT2	7.02617e-13	0.334191	0.781	0.764	1.47479e-08	acetyl-CoA acetyltransferase 2 [Source:HGNC Symbol;Acc:HGNC:94]	1	Neurons
IAH1	8.95449e-13	0.254584	0.398	0.304	1.87955e-08	isoamyl acetate hydrolyzing esterase 1 (putative) [Source:HGNC Symbol;Acc:HGNC:27696]	1	Neurons
CRIM1	1.90382e-12	-0.317451	0.453	0.638	3.99613e-08	cysteine rich transmembrane BMP regulator 1 [Source:HGNC Symbol;Acc:HGNC:2359]	1	Neurons
CLIC1	2.81196e-12	0.275611	0.687	0.642	5.90231e-08	chloride intracellular channel 1 [Source:HGNC Symbol;Acc:HGNC:2062]	1	Neurons
HERPUD1	3.1665e-12	0.263591	0.69	0.688	6.64648e-08	homocysteine inducible ER protein with ubiquitin like domain 1 [Source:HGNC Symbol;Acc:HGNC:13744]	1	Neurons
PCSK1N	3.40094e-12	-0.253854	0.963	0.985	7.13858e-08	proprotein convertase subtilisin/kexin type 1 inhibitor [Source:HGNC Symbol;Acc:HGNC:17301]	1	Neurons
FAM110A	3.66551e-12	0.28932	0.67	0.626	7.6939e-08	family with sequence similarity 110 member A [Source:HGNC Symbol;Acc:HGNC:16188]	1	Neurons
HMGCS1	4.23634e-12	0.390325	0.801	0.782	8.89207e-08	3-hydroxy-3-methylglutaryl-CoA synthase 1 [Source:HGNC Symbol;Acc:HGNC:5007]	1	Neurons
HRC	5.06482e-12	0.318192	0.471	0.362	1.06311e-07	histidine rich calcium binding protein [Source:HGNC Symbol;Acc:HGNC:5178]	1	Neurons
HOXB9	6.94183e-12	0.28092	0.943	0.916	1.45709e-07	homeobox B9 [Source:HGNC Symbol;Acc:HGNC:5120]	1	Neurons
LZTS1	7.842e-12	0.315576	0.606	0.515	1.64604e-07	leucine zipper tumor suppressor 1 [Source:HGNC Symbol;Acc:HGNC:13861]	1	Neurons
NOVA1	8.88607e-12	-0.277848	0.985	0.998	1.86519e-07	NOVA alternative splicing regulator 1 [Source:HGNC Symbol;Acc:HGNC:7886]	1	Neurons
PRDX1	1.04179e-11	0.328185	0.946	0.937	2.18672e-07	peroxiredoxin 1 [Source:HGNC Symbol;Acc:HGNC:9352]	1	Neurons
FDPS	1.16071e-11	0.321018	0.878	0.841	2.43633e-07	farnesyl diphosphate synthase [Source:HGNC Symbol;Acc:HGNC:3631]	1	Neurons
GREM2	1.74638e-11	0.297462	0.844	0.782	3.66565e-07	gremlin 2, DAN family BMP antagonist [Source:HGNC Symbol;Acc:HGNC:17655]	1	Neurons
TMEM161B-AS1	1.84599e-11	-0.280823	0.311	0.487	3.87474e-07	TMEM161B antisense RNA 1 [Source:HGNC Symbol;Acc:HGNC:43839]	1	Neurons
DLL3	2.86513e-11	0.445628	0.938	0.88	6.0139e-07	delta like canonical Notch ligand 3 [Source:HGNC Symbol;Acc:HGNC:2909]	1	Neurons
HOXC12	3.30415e-11	-0.332905	0.623	0.775	6.93542e-07	homeobox C12 [Source:HGNC Symbol;Acc:HGNC:5124]	1	Neurons
DNER	5.48005e-11	0.250748	0.965	0.969	1.15026e-06	delta/notch like EGF repeat containing [Source:HGNC Symbol;Acc:HGNC:24456]	1	Neurons
VCAN	8.40082e-11	-0.265896	0.62	0.78	1.76333e-06	versican [Source:HGNC Symbol;Acc:HGNC:2464]	1	Neurons
ATP1B1	1.03133e-10	-0.313301	0.871	0.937	2.16477e-06	ATPase Na+/K+ transporting subunit beta 1 [Source:HGNC Symbol;Acc:HGNC:804]	1	Neurons
SEZ6L2	1.05391e-10	0.263551	0.933	0.924	2.21217e-06	seizure related 6 homolog like 2 [Source:HGNC Symbol;Acc:HGNC:30844]	1	Neurons
SCN3A	1.10285e-10	0.276604	0.623	0.549	2.31488e-06	sodium voltage-gated channel alpha subunit 3 [Source:HGNC Symbol;Acc:HGNC:10590]	1	Neurons
HSPA5	1.17508e-10	0.353752	0.863	0.841	2.4665e-06	heat shock protein family A (Hsp70) member 5 [Source:HGNC Symbol;Acc:HGNC:5238]	1	Neurons
HSP90B1	1.67105e-10	0.327667	0.804	0.769	3.50752e-06	heat shock protein 90 beta family member 1 [Source:HGNC Symbol;Acc:HGNC:12028]	1	Neurons
TSTD1	1.80897e-10	0.274379	0.376	0.257	3.79703e-06	thiosulfate sulfurtransferase like domain containing 1 [Source:HGNC Symbol;Acc:HGNC:35410]	1	Neurons
SYBU	2.06125e-10	0.30036	0.352	0.228	4.32657e-06	syntabulin [Source:HGNC Symbol;Acc:HGNC:26011]	1	Neurons
LDHA	5.61752e-10	0.371358	0.405	0.341	1.17912e-05	lactate dehydrogenase A [Source:HGNC Symbol;Acc:HGNC:6535]	1	Neurons
EZR	1.64092e-09	0.295914	0.573	0.534	3.44429e-05	ezrin [Source:HGNC Symbol;Acc:HGNC:12691]	1	Neurons
MSMO1	1.86914e-09	0.275855	0.749	0.73	3.92332e-05	methylsterol monooxygenase 1 [Source:HGNC Symbol;Acc:HGNC:10545]	1	Neurons
KIF21A	3.03932e-09	-0.297467	0.859	0.921	6.37954e-05	kinesin family member 21A [Source:HGNC Symbol;Acc:HGNC:19349]	1	Neurons
MDK	3.63498e-09	0.287325	0.958	0.934	7.62983e-05	midkine [Source:HGNC Symbol;Acc:HGNC:6972]	1	Neurons
TMEM176A	3.81943e-09	0.365103	0.444	0.316	8.01699e-05	transmembrane protein 176A [Source:HGNC Symbol;Acc:HGNC:24930]	1	Neurons
OLIG3	8.78696e-09	0.272387	0.645	0.599	0.000184438	oligodendrocyte transcription factor 3 [Source:HGNC Symbol;Acc:HGNC:18003]	1	Neurons
BCYRN1	2.06943e-08	0.726447	0.456	0.38	0.000434374	brain cytoplasmic RNA 1 [Source:HGNC Symbol;Acc:HGNC:1022]	1	Neurons
SPON2	2.30539e-08	0.267507	0.403	0.328	0.000483902	spondin 2 [Source:HGNC Symbol;Acc:HGNC:11253]	1	Neurons
CBLN2	2.73322e-08	0.307877	0.298	0.206	0.000573703	cerebellin 2 precursor [Source:HGNC Symbol;Acc:HGNC:1544]	1	Neurons
LSAMP	7.02057e-08	0.276211	0.775	0.718	0.00147362	limbic system associated membrane protein [Source:HGNC Symbol;Acc:HGNC:6705]	1	Neurons
C1QL1	1.17855e-07	0.26123	0.409	0.327	0.00247377	complement C1q like 1 [Source:HGNC Symbol;Acc:HGNC:24182]	1	Neurons
SNCG	1.3013e-07	0.254045	0.658	0.608	0.00273144	synuclein gamma [Source:HGNC Symbol;Acc:HGNC:11141]	1	Neurons
SH3BGRL3	3.08379e-07	0.258396	0.959	0.968	0.00647287	SH3 domain binding glutamate rich protein like 3 [Source:HGNC Symbol;Acc:HGNC:15568]	1	Neurons
RBP1	4.3493e-07	0.305664	0.932	0.905	0.00912918	retinol binding protein 1 [Source:HGNC Symbol;Acc:HGNC:9919]	1	Neurons
RUNX1T1	1.96143e-06	-0.253564	0.461	0.589	0.0411704	RUNX1 partner transcriptional co-repressor 1 [Source:HGNC Symbol;Acc:HGNC:1535]	1	Neurons
QPCT	1.91863e-71	2.50422	0.719	0.192	4.0272e-67	glutaminyl-peptide cyclotransferase [Source:HGNC Symbol;Acc:HGNC:9753]	12	Oligodendrocytes
PEG3	2.04584e-42	0.600727	0.391	0	4.29421e-38	paternally expressed 3 [Source:HGNC Symbol;Acc:HGNC:8826]	12	Oligodendrocytes
GPR143	4.5389e-42	1.40126	0.758	0.313	9.52716e-38	G protein-coupled receptor 143 [Source:HGNC Symbol;Acc:HGNC:20145]	12	Oligodendrocytes
ARMCX1	1.23275e-39	-0.486187	0.104	0.601	2.58755e-35	armadillo repeat containing X-linked 1 [Source:HGNC Symbol;Acc:HGNC:18073]	12	Oligodendrocytes
GNPDA1	2.33171e-38	-0.485885	0.254	0.776	4.89426e-34	glucosamine-6-phosphate deaminase 1 [Source:HGNC Symbol;Acc:HGNC:4417]	12	Oligodendrocytes
CBR1	1.37785e-31	0.373593	0.422	0.039	2.8921e-27	carbonyl reductase 1 [Source:HGNC Symbol;Acc:HGNC:1548]	12	Oligodendrocytes
PRMT2	1.14492e-27	0.579041	0.917	0.868	2.40318e-23	protein arginine methyltransferase 2 [Source:HGNC Symbol;Acc:HGNC:5186]	12	Oligodendrocytes
NNAT	4.75121e-21	-0.621286	0.128	0.48	9.9728e-17	neuronatin [Source:HGNC Symbol;Acc:HGNC:7860]	12	Oligodendrocytes
RPL35A	9.24826e-21	-0.407713	0.994	1	1.94121e-16	ribosomal protein L35a [Source:HGNC Symbol;Acc:HGNC:10345]	12	Oligodendrocytes
MT-ATP8	1.57245e-20	0.562683	0.899	0.886	3.30057e-16	mitochondrially encoded ATP synthase membrane subunit 8 [Source:HGNC Symbol;Acc:HGNC:7415]	12	Oligodendrocytes
MTRNR2L12	2.00388e-19	-0.614854	0.887	0.975	4.20615e-15	MT-RNR2 like 12 [Source:HGNC Symbol;Acc:HGNC:37169]	12	Oligodendrocytes
PABPC4	2.14546e-19	0.502023	0.933	0.858	4.50333e-15	poly(A) binding protein cytoplasmic 4 [Source:HGNC Symbol;Acc:HGNC:8557]	12	Oligodendrocytes
NMT1	5.31147e-19	0.38761	0.887	0.804	1.11488e-14	N-myristoyltransferase 1 [Source:HGNC Symbol;Acc:HGNC:7857]	12	Oligodendrocytes
RPS18	2.85658e-18	-0.393351	0.997	1	5.99596e-14	ribosomal protein S18 [Source:HGNC Symbol;Acc:HGNC:10401]	12	Oligodendrocytes
SNORA76	3.55231e-18	0.506847	0.887	0.811	7.4563e-14	NA	12	Oligodendrocytes
CBX3	5.10642e-18	0.430898	0.957	0.961	1.07184e-13	chromobox 3 [Source:HGNC Symbol;Acc:HGNC:1553]	12	Oligodendrocytes
EDNRB	5.94643e-18	-0.921013	0.251	0.598	1.24816e-13	endothelin receptor type B [Source:HGNC Symbol;Acc:HGNC:3180]	12	Oligodendrocytes
RPL27	1.03878e-17	-0.338351	0.988	0.996	2.18039e-13	ribosomal protein L27 [Source:HGNC Symbol;Acc:HGNC:10328]	12	Oligodendrocytes
RPL15	2.38835e-17	-0.287951	1	1	5.01314e-13	ribosomal protein L15 [Source:HGNC Symbol;Acc:HGNC:10306]	12	Oligodendrocytes
RPL35	2.87288e-17	-0.331512	0.991	1	6.03018e-13	ribosomal protein L35 [Source:HGNC Symbol;Acc:HGNC:10344]	12	Oligodendrocytes
RPS19	3.51316e-17	-0.339609	0.997	1	7.37412e-13	ribosomal protein S19 [Source:HGNC Symbol;Acc:HGNC:10402]	12	Oligodendrocytes
RPL21	3.71439e-17	-0.35191	1	0.996	7.7965e-13	ribosomal protein L21 [Source:HGNC Symbol;Acc:HGNC:10313]	12	Oligodendrocytes
EMC4	4.13721e-17	-0.40001	0.557	0.829	8.684e-13	ER membrane protein complex subunit 4 [Source:HGNC Symbol;Acc:HGNC:28032]	12	Oligodendrocytes
RPL36	5.41343e-17	-0.326986	0.994	1	1.13628e-12	ribosomal protein L36 [Source:HGNC Symbol;Acc:HGNC:13631]	12	Oligodendrocytes
RPL37	1.50641e-16	-0.293071	0.997	1	3.16195e-12	ribosomal protein L37 [Source:HGNC Symbol;Acc:HGNC:10347]	12	Oligodendrocytes
RBMX	1.67343e-16	0.451509	0.963	0.982	3.51252e-12	RNA binding motif protein X-linked [Source:HGNC Symbol;Acc:HGNC:9910]	12	Oligodendrocytes
RPL27A	1.88087e-16	-0.482234	0.988	0.996	3.94794e-12	ribosomal protein L27a [Source:HGNC Symbol;Acc:HGNC:10329]	12	Oligodendrocytes
TRPM1	2.05221e-15	1.0626	0.713	0.53	4.30758e-11	transient receptor potential cation channel subfamily M member 1 [Source:HGNC Symbol;Acc:HGNC:7146]	12	Oligodendrocytes
VAT1	3.06731e-15	0.456414	0.893	0.847	6.43829e-11	vesicle amine transport 1 [Source:HGNC Symbol;Acc:HGNC:16919]	12	Oligodendrocytes
RPL23A	8.22601e-15	-0.306229	0.991	1	1.72664e-10	ribosomal protein L23a [Source:HGNC Symbol;Acc:HGNC:10317]	12	Oligodendrocytes
RPSA	9.83399e-15	-0.323926	0.991	1	2.06416e-10	ribosomal protein SA [Source:HGNC Symbol;Acc:HGNC:6502]	12	Oligodendrocytes
GSTT1	1.72202e-14	-0.359417	0.508	0.779	3.61453e-10	glutathione S-transferase theta 1 [Source:HGNC Symbol;Acc:HGNC:4641]	12	Oligodendrocytes
RPL37A	3.01974e-14	-0.31595	0.997	1	6.33843e-10	ribosomal protein L37a [Source:HGNC Symbol;Acc:HGNC:10348]	12	Oligodendrocytes
POLE4	3.2156e-14	-0.3348	0.416	0.683	6.74955e-10	DNA polymerase epsilon 4, accessory subunit [Source:HGNC Symbol;Acc:HGNC:18755]	12	Oligodendrocytes
RPL26	3.24653e-14	-0.303255	0.991	1	6.81447e-10	ribosomal protein L26 [Source:HGNC Symbol;Acc:HGNC:10327]	12	Oligodendrocytes
RPS2	4.92408e-14	-0.312649	0.994	1	1.03356e-09	ribosomal protein S2 [Source:HGNC Symbol;Acc:HGNC:10404]	12	Oligodendrocytes
RPS9	5.73846e-14	-0.25297	0.991	0.996	1.2045e-09	ribosomal protein S9 [Source:HGNC Symbol;Acc:HGNC:10442]	12	Oligodendrocytes
TCEAL8	6.82704e-14	0.395007	0.905	0.851	1.43299e-09	transcription elongation factor A like 8 [Source:HGNC Symbol;Acc:HGNC:28683]	12	Oligodendrocytes
RPS16	9.13835e-14	-0.312374	0.997	1	1.91814e-09	ribosomal protein S16 [Source:HGNC Symbol;Acc:HGNC:10396]	12	Oligodendrocytes
MIF	1.16819e-13	-0.457631	0.829	0.94	2.45202e-09	macrophage migration inhibitory factor [Source:HGNC Symbol;Acc:HGNC:7097]	12	Oligodendrocytes
LDHA	1.61851e-13	0.712036	0.78	0.534	3.39724e-09	lactate dehydrogenase A [Source:HGNC Symbol;Acc:HGNC:6535]	12	Oligodendrocytes
ATP5J2	2.09849e-13	0.384732	0.96	0.957	4.40472e-09	NA	12	Oligodendrocytes
RPL32	5.45794e-13	-0.287056	0.997	1	1.14562e-08	ribosomal protein L32 [Source:HGNC Symbol;Acc:HGNC:10336]	12	Oligodendrocytes
C9orf3	5.58328e-13	0.546449	0.719	0.548	1.17193e-08	NA	12	Oligodendrocytes
HSPA1A	9.19382e-13	0.439987	0.7	0.47	1.92978e-08	heat shock protein family A (Hsp70) member 1A [Source:HGNC Symbol;Acc:HGNC:5232]	12	Oligodendrocytes
GPR56	1.01306e-12	0.6037	0.709	0.573	2.1264e-08	NA	12	Oligodendrocytes
PTGDS	1.10657e-12	0.735444	0.939	0.918	2.32268e-08	prostaglandin D2 synthase [Source:HGNC Symbol;Acc:HGNC:9592]	12	Oligodendrocytes
RPL34	1.31107e-12	-0.272753	0.994	1	2.75194e-08	ribosomal protein L34 [Source:HGNC Symbol;Acc:HGNC:10340]	12	Oligodendrocytes
RPS24	1.48115e-12	-0.345464	0.997	1	3.10893e-08	ribosomal protein S24 [Source:HGNC Symbol;Acc:HGNC:10411]	12	Oligodendrocytes
PCSK2	1.89532e-12	0.58212	0.336	0.114	3.97828e-08	proprotein convertase subtilisin/kexin type 2 [Source:HGNC Symbol;Acc:HGNC:8744]	12	Oligodendrocytes
AP2B1	2.54346e-12	0.34428	0.869	0.847	5.33873e-08	adaptor related protein complex 2 subunit beta 1 [Source:HGNC Symbol;Acc:HGNC:563]	12	Oligodendrocytes
RPS10	4.38422e-12	-0.286368	0.985	1	9.20248e-08	ribosomal protein S10 [Source:HGNC Symbol;Acc:HGNC:10383]	12	Oligodendrocytes
TBCA	8.32046e-12	0.318982	0.985	0.986	1.74647e-07	tubulin folding cofactor A [Source:HGNC Symbol;Acc:HGNC:11579]	12	Oligodendrocytes
PABPC1	1.26586e-11	0.319019	0.991	0.993	2.65703e-07	poly(A) binding protein cytoplasmic 1 [Source:HGNC Symbol;Acc:HGNC:8554]	12	Oligodendrocytes
RPS21	1.40573e-11	-0.284082	0.991	1	2.95063e-07	ribosomal protein S21 [Source:HGNC Symbol;Acc:HGNC:10409]	12	Oligodendrocytes
APCDD1	3.79712e-11	0.888478	0.823	0.705	7.97015e-07	APC down-regulated 1 [Source:HGNC Symbol;Acc:HGNC:15718]	12	Oligodendrocytes
IAH1	4.60581e-11	0.340606	0.688	0.488	9.66759e-07	isoamyl acetate hydrolyzing esterase 1 (putative) [Source:HGNC Symbol;Acc:HGNC:27696]	12	Oligodendrocytes
RPS28	5.50883e-11	-0.297181	0.988	1	1.1563e-06	ribosomal protein S28 [Source:HGNC Symbol;Acc:HGNC:10418]	12	Oligodendrocytes
CPQ	5.77521e-11	0.500411	0.771	0.658	1.21222e-06	carboxypeptidase Q [Source:HGNC Symbol;Acc:HGNC:16910]	12	Oligodendrocytes
ANXA2	6.69904e-11	0.569777	0.972	0.929	1.40613e-06	annexin A2 [Source:HGNC Symbol;Acc:HGNC:537]	12	Oligodendrocytes
RPS14	7.18047e-11	-0.260333	0.994	1	1.50718e-06	ribosomal protein S14 [Source:HGNC Symbol;Acc:HGNC:10387]	12	Oligodendrocytes
THOC1	8.32253e-11	0.304213	0.547	0.391	1.7469e-06	THO complex 1 [Source:HGNC Symbol;Acc:HGNC:19070]	12	Oligodendrocytes
OLFML3	1.05362e-10	0.632416	0.554	0.356	2.21155e-06	olfactomedin like 3 [Source:HGNC Symbol;Acc:HGNC:24956]	12	Oligodendrocytes
RPL18A	1.28055e-10	-0.253011	0.994	1	2.68788e-06	ribosomal protein L18a [Source:HGNC Symbol;Acc:HGNC:10311]	12	Oligodendrocytes
GOLGA2	2.50185e-10	0.334103	0.774	0.644	5.25139e-06	golgin A2 [Source:HGNC Symbol;Acc:HGNC:4425]	12	Oligodendrocytes
WBP5	3.44911e-10	0.343199	0.93	0.875	7.23968e-06	NA	12	Oligodendrocytes
SAT1	3.58613e-10	0.654061	0.966	0.875	7.52729e-06	spermidine/spermine N1-acetyltransferase 1 [Source:HGNC Symbol;Acc:HGNC:10540]	12	Oligodendrocytes
ATP6AP1	1.07955e-09	0.389505	0.884	0.868	2.26598e-05	ATPase H+ transporting accessory protein 1 [Source:HGNC Symbol;Acc:HGNC:868]	12	Oligodendrocytes
CETN3	1.99207e-09	0.31212	0.709	0.594	4.18136e-05	centrin 3 [Source:HGNC Symbol;Acc:HGNC:1868]	12	Oligodendrocytes
RPL17	2.08017e-09	-0.29457	0.942	0.979	4.36628e-05	ribosomal protein L17 [Source:HGNC Symbol;Acc:HGNC:10307]	12	Oligodendrocytes
DYNC1I2	2.33106e-09	0.280613	0.948	0.936	4.8929e-05	dynein cytoplasmic 1 intermediate chain 2 [Source:HGNC Symbol;Acc:HGNC:2964]	12	Oligodendrocytes
PRELP	2.74842e-09	0.36728	0.508	0.338	5.76893e-05	proline and arginine rich end leucine rich repeat protein [Source:HGNC Symbol;Acc:HGNC:9357]	12	Oligodendrocytes
S100A10	2.98304e-09	0.344206	0.972	0.89	6.2614e-05	S100 calcium binding protein A10 [Source:HGNC Symbol;Acc:HGNC:10487]	12	Oligodendrocytes
LINGO1	3.20415e-09	0.285829	0.734	0.651	6.72552e-05	leucine rich repeat and Ig domain containing 1 [Source:HGNC Symbol;Acc:HGNC:21205]	12	Oligodendrocytes
SST	3.4413e-09	-2.02723	0.049	0.21	7.22328e-05	somatostatin [Source:HGNC Symbol;Acc:HGNC:11329]	12	Oligodendrocytes
RPL36A	3.89491e-09	-0.260542	0.985	0.996	8.17541e-05	ribosomal protein L36a [Source:HGNC Symbol;Acc:HGNC:10359]	12	Oligodendrocytes
FAM89A	4.39112e-09	0.492577	0.633	0.452	9.21695e-05	family with sequence similarity 89 member A [Source:HGNC Symbol;Acc:HGNC:25057]	12	Oligodendrocytes
PLP1	6.14101e-09	0.556009	0.887	0.797	0.0001289	proteolipid protein 1 [Source:HGNC Symbol;Acc:HGNC:9086]	12	Oligodendrocytes
MAGEH1	6.23235e-09	0.359529	0.761	0.719	0.000130817	MAGE family member H1 [Source:HGNC Symbol;Acc:HGNC:24092]	12	Oligodendrocytes
RPL31	6.78635e-09	-0.250593	0.991	1	0.000142445	ribosomal protein L31 [Source:HGNC Symbol;Acc:HGNC:10334]	12	Oligodendrocytes
CTSB	9.46917e-09	0.378143	0.85	0.783	0.000198758	cathepsin B [Source:HGNC Symbol;Acc:HGNC:2527]	12	Oligodendrocytes
TACC1	1.23891e-08	0.517999	0.731	0.637	0.000260047	transforming acidic coiled-coil containing protein 1 [Source:HGNC Symbol;Acc:HGNC:11522]	12	Oligodendrocytes
CNFN	1.24016e-08	-0.485744	0.128	0.292	0.000260309	cornifelin [Source:HGNC Symbol;Acc:HGNC:30183]	12	Oligodendrocytes
CNTNAP4	1.45001e-08	-0.318863	0.031	0.167	0.000304358	contactin associated protein like 4 [Source:HGNC Symbol;Acc:HGNC:18747]	12	Oligodendrocytes
SLC3A2	1.50154e-08	0.356978	0.96	0.904	0.000315173	solute carrier family 3 member 2 [Source:HGNC Symbol;Acc:HGNC:11026]	12	Oligodendrocytes
MFSD12	1.69053e-08	0.557575	0.847	0.744	0.000354841	major facilitator superfamily domain containing 12 [Source:HGNC Symbol;Acc:HGNC:28299]	12	Oligodendrocytes
PSMC1	1.78378e-08	0.250899	0.884	0.868	0.000374416	proteasome 26S subunit, ATPase 1 [Source:HGNC Symbol;Acc:HGNC:9547]	12	Oligodendrocytes
SHC2	1.83956e-08	0.320012	0.731	0.637	0.000386123	SHC adaptor protein 2 [Source:HGNC Symbol;Acc:HGNC:29869]	12	Oligodendrocytes
PTTG1IP	2.50111e-08	0.35896	0.902	0.858	0.000524984	PTTG1 interacting protein [Source:HGNC Symbol;Acc:HGNC:13524]	12	Oligodendrocytes
RP11-304L19.5	2.56233e-08	-0.285833	0.471	0.683	0.000537834	NA	12	Oligodendrocytes
SLC6A17	3.34223e-08	0.255418	0.373	0.181	0.000701534	solute carrier family 6 member 17 [Source:HGNC Symbol;Acc:HGNC:31399]	12	Oligodendrocytes
CXXC5	3.79621e-08	0.293539	0.872	0.868	0.000796825	CXXC finger protein 5 [Source:HGNC Symbol;Acc:HGNC:26943]	12	Oligodendrocytes
TUBB2A	6.00323e-08	0.485849	0.89	0.84	0.00126008	tubulin beta 2A class IIa [Source:HGNC Symbol;Acc:HGNC:12412]	12	Oligodendrocytes
HES1	7.12041e-08	0.503201	0.945	0.929	0.00149457	hes family bHLH transcription factor 1 [Source:HGNC Symbol;Acc:HGNC:5192]	12	Oligodendrocytes
FAM181A	7.87414e-08	-0.345703	0.061	0.171	0.00165278	family with sequence similarity 181 member A [Source:HGNC Symbol;Acc:HGNC:20491]	12	Oligodendrocytes
BACE2	7.98363e-08	0.424561	0.847	0.705	0.00167576	beta-secretase 2 [Source:HGNC Symbol;Acc:HGNC:934]	12	Oligodendrocytes
GPNMB	8.01008e-08	0.541881	0.731	0.616	0.00168132	glycoprotein nmb [Source:HGNC Symbol;Acc:HGNC:4462]	12	Oligodendrocytes
HES4	1.22887e-07	0.409712	0.722	0.544	0.0025794	hes family bHLH transcription factor 4 [Source:HGNC Symbol;Acc:HGNC:24149]	12	Oligodendrocytes
LY6E	1.27613e-07	-0.336467	0.627	0.79	0.0026786	lymphocyte antigen 6 family member E [Source:HGNC Symbol;Acc:HGNC:6727]	12	Oligodendrocytes
ASAH1	1.50025e-07	0.4017	0.838	0.829	0.00314902	N-acylsphingosine amidohydrolase 1 [Source:HGNC Symbol;Acc:HGNC:735]	12	Oligodendrocytes
RUNX3	2.28576e-07	0.300838	0.263	0.11	0.00479781	RUNX family transcription factor 3 [Source:HGNC Symbol;Acc:HGNC:10473]	12	Oligodendrocytes
NUDT4	2.83275e-07	-0.592976	0.55	0.68	0.00594595	nudix hydrolase 4 [Source:HGNC Symbol;Acc:HGNC:8051]	12	Oligodendrocytes
ST3GAL5	3.12113e-07	0.313892	0.434	0.302	0.00655126	ST3 beta-galactoside alpha-2,3-sialyltransferase 5 [Source:HGNC Symbol;Acc:HGNC:10872]	12	Oligodendrocytes
LZTS2	3.49472e-07	0.25435	0.599	0.463	0.00733542	leucine zipper tumor suppressor 2 [Source:HGNC Symbol;Acc:HGNC:29381]	12	Oligodendrocytes
GABARAP	3.57369e-07	0.260581	0.765	0.687	0.00750117	GABA type A receptor-associated protein [Source:HGNC Symbol;Acc:HGNC:4067]	12	Oligodendrocytes
PAG1	3.69269e-07	0.36697	0.596	0.48	0.00775095	phosphoprotein membrane anchor with glycosphingolipid microdomains 1 [Source:HGNC Symbol;Acc:HGNC:30043]	12	Oligodendrocytes
BZW2	4.75307e-07	0.387096	0.939	0.886	0.00997669	basic leucine zipper and W2 domains 2 [Source:HGNC Symbol;Acc:HGNC:18808]	12	Oligodendrocytes
BCYRN1	5.40665e-07	0.807171	0.725	0.58	0.0113486	brain cytoplasmic RNA 1 [Source:HGNC Symbol;Acc:HGNC:1022]	12	Oligodendrocytes
HHIP	6.23828e-07	-0.497875	0.119	0.292	0.0130941	hedgehog interacting protein [Source:HGNC Symbol;Acc:HGNC:14866]	12	Oligodendrocytes
CRYM	6.43237e-07	0.280914	0.382	0.21	0.0135015	crystallin mu [Source:HGNC Symbol;Acc:HGNC:2418]	12	Oligodendrocytes
CD9	8.04777e-07	0.378674	0.535	0.352	0.0168923	CD9 molecule [Source:HGNC Symbol;Acc:HGNC:1709]	12	Oligodendrocytes
TFAP2A	1.06807e-06	0.405578	0.869	0.772	0.0224189	transcription factor AP-2 alpha [Source:HGNC Symbol;Acc:HGNC:11742]	12	Oligodendrocytes
RPS20	1.08064e-06	-0.264336	0.979	0.989	0.0226826	ribosomal protein S20 [Source:HGNC Symbol;Acc:HGNC:10405]	12	Oligodendrocytes
RFX4	1.09025e-06	-0.408886	0.177	0.253	0.0228844	regulatory factor X4 [Source:HGNC Symbol;Acc:HGNC:9985]	12	Oligodendrocytes
RHOC	1.37539e-06	0.30602	0.887	0.868	0.0288694	ras homolog family member C [Source:HGNC Symbol;Acc:HGNC:669]	12	Oligodendrocytes
FDFT1	1.54505e-06	0.28708	0.835	0.836	0.0324307	farnesyl-diphosphate farnesyltransferase 1 [Source:HGNC Symbol;Acc:HGNC:3629]	12	Oligodendrocytes
FDFT1	1.54505e-06	0.28708	0.835	0.836	0.0324307	farnesyl-diphosphate farnesyltransferase 1 [Source:NCBI gene;Acc:2222]	12	Oligodendrocytes
ITGA4	1.58381e-06	-0.354781	0.076	0.199	0.0332442	integrin subunit alpha 4 [Source:HGNC Symbol;Acc:HGNC:6140]	12	Oligodendrocytes
CDH11	1.73206e-06	-0.36355	0.205	0.391	0.0363559	cadherin 11 [Source:HGNC Symbol;Acc:HGNC:1750]	12	Oligodendrocytes
GSTP1	2.03818e-06	0.470776	0.991	1	0.0427814	glutathione S-transferase pi 1 [Source:HGNC Symbol;Acc:HGNC:4638]	12	Oligodendrocytes
HSPE1	2.15367e-06	-0.300894	0.948	0.975	0.0452056	heat shock protein family E (Hsp10) member 1 [Source:HGNC Symbol;Acc:HGNC:5269]	12	Oligodendrocytes
QPCT	1.76683e-24	2.28954	0.773	0.035	3.70858e-20	glutaminyl-peptide cyclotransferase [Source:HGNC Symbol;Acc:HGNC:9753]	14	Astrocytes
TAF9B	1.31463e-22	-0.349649	0	0.544	2.7594e-18	TATA-box binding protein associated factor 9b [Source:HGNC Symbol;Acc:HGNC:17306]	14	Astrocytes
NNAT	2.47176e-18	-0.878127	0.182	0.842	5.18823e-14	neuronatin [Source:HGNC Symbol;Acc:HGNC:7860]	14	Astrocytes
ARMCX1	1.53711e-17	-0.450864	0.026	0.561	3.22639e-13	armadillo repeat containing X-linked 1 [Source:HGNC Symbol;Acc:HGNC:18073]	14	Astrocytes
GNPDA1	9.07912e-14	-0.473414	0.169	0.737	1.90571e-09	glucosamine-6-phosphate deaminase 1 [Source:HGNC Symbol;Acc:HGNC:4417]	14	Astrocytes
RBMX	1.13563e-11	0.678615	0.974	0.982	2.38369e-07	RNA binding motif protein X-linked [Source:HGNC Symbol;Acc:HGNC:9910]	14	Astrocytes
PEG3	1.40614e-11	0.501467	0.396	0	2.95149e-07	paternally expressed 3 [Source:HGNC Symbol;Acc:HGNC:8826]	14	Astrocytes
MTRNR2L12	3.668e-11	-0.823287	0.857	0.982	7.69913e-07	MT-RNR2 like 12 [Source:HGNC Symbol;Acc:HGNC:37169]	14	Astrocytes
CBR1	5.76614e-11	0.383752	0.526	0.053	1.21031e-06	carbonyl reductase 1 [Source:HGNC Symbol;Acc:HGNC:1548]	14	Astrocytes
ATP5J2	4.28111e-10	0.511471	0.987	0.965	8.98604e-06	NA	14	Astrocytes
PKIB	1.0686e-08	0.308562	0.383	0.018	0.000224299	cAMP-dependent protein kinase inhibitor beta [Source:HGNC Symbol;Acc:HGNC:9018]	14	Astrocytes
EDNRB	1.91409e-07	-0.634674	0.214	0.596	0.00401768	endothelin receptor type B [Source:HGNC Symbol;Acc:HGNC:3180]	14	Astrocytes
CBX3	2.41951e-07	0.402853	0.981	0.982	0.00507854	chromobox 3 [Source:HGNC Symbol;Acc:HGNC:1553]	14	Astrocytes
PCDHB5	3.29423e-07	0.316638	0.37	0.035	0.00691459	protocadherin beta 5 [Source:HGNC Symbol;Acc:HGNC:8690]	14	Astrocytes
SNORA76	6.51387e-07	0.624009	0.883	0.772	0.0136726	NA	14	Astrocytes
RPS18	1.49419e-06	-0.304777	1	1	0.0313632	ribosomal protein S18 [Source:HGNC Symbol;Acc:HGNC:10401]	14	Astrocytes
EMC4	1.4989e-06	-0.378465	0.669	0.807	0.0314619	ER membrane protein complex subunit 4 [Source:HGNC Symbol;Acc:HGNC:28032]	14	Astrocytes
PEG3	6.84198e-252	1.3788	0.706	0.001	1.43613e-247	paternally expressed 3 [Source:HGNC Symbol;Acc:HGNC:8826]	0	Radial Glia
RBMX	2.85349e-114	0.693012	0.995	0.991	5.98948e-110	RNA binding motif protein X-linked [Source:HGNC Symbol;Acc:HGNC:9910]	0	Radial Glia
TAF9B	5.39514e-98	-0.345627	0.001	0.321	1.13244e-93	TATA-box binding protein associated factor 9b [Source:HGNC Symbol;Acc:HGNC:17306]	0	Radial Glia
NNAT	7.05861e-95	-0.847539	0.193	0.676	1.4816e-90	neuronatin [Source:HGNC Symbol;Acc:HGNC:7860]	0	Radial Glia
ARMCX1	1.10401e-90	-0.461661	0.062	0.467	2.31732e-86	armadillo repeat containing X-linked 1 [Source:HGNC Symbol;Acc:HGNC:18073]	0	Radial Glia
GNPDA1	1.63714e-81	-0.513261	0.152	0.585	3.43636e-77	glucosamine-6-phosphate deaminase 1 [Source:HGNC Symbol;Acc:HGNC:4417]	0	Radial Glia
PCDHB5	1.17529e-73	0.465736	0.353	0.033	2.46692e-69	protocadherin beta 5 [Source:HGNC Symbol;Acc:HGNC:8690]	0	Radial Glia
MTRNR2L12	1.51408e-66	-0.714203	0.764	0.945	3.17805e-62	MT-RNR2 like 12 [Source:HGNC Symbol;Acc:HGNC:37169]	0	Radial Glia
GSTT1	1.45751e-61	-0.529653	0.457	0.801	3.05932e-57	glutathione S-transferase theta 1 [Source:HGNC Symbol;Acc:HGNC:4641]	0	Radial Glia
ATP5J2	2.02645e-59	0.526107	0.974	0.938	4.25351e-55	NA	0	Radial Glia
CBR1	7.321e-53	0.323062	0.277	0.027	1.53668e-48	carbonyl reductase 1 [Source:HGNC Symbol;Acc:HGNC:1548]	0	Radial Glia
NTM	7.42661e-44	0.874123	0.601	0.368	1.55884e-39	neurotrimin [Source:HGNC Symbol;Acc:HGNC:17941]	0	Radial Glia
MEST	9.20602e-44	0.552782	0.974	0.954	1.93234e-39	mesoderm specific transcript [Source:HGNC Symbol;Acc:HGNC:7028]	0	Radial Glia
EMC4	2.84508e-42	-0.435212	0.535	0.81	5.97182e-38	ER membrane protein complex subunit 4 [Source:HGNC Symbol;Acc:HGNC:28032]	0	Radial Glia
NLRP1	6.97161e-42	0.560967	0.996	0.995	1.46334e-37	NLR family pyrin domain containing 1 [Source:HGNC Symbol;Acc:HGNC:14374]	0	Radial Glia
NMT1	5.12954e-40	0.430513	0.793	0.676	1.07669e-35	N-myristoyltransferase 1 [Source:HGNC Symbol;Acc:HGNC:7857]	0	Radial Glia
WLS	6.73126e-40	0.421432	0.999	0.991	1.41289e-35	Wnt ligand secretion mediator [Source:HGNC Symbol;Acc:HGNC:30238]	0	Radial Glia
MT-ATP8	1.12692e-39	0.470761	0.883	0.836	2.3654e-35	mitochondrially encoded ATP synthase membrane subunit 8 [Source:HGNC Symbol;Acc:HGNC:7415]	0	Radial Glia
7SK.2	1.03822e-38	-0.416961	0.532	0.813	2.17922e-34	NA	0	Radial Glia
IGFBP7-AS1	2.03188e-37	-0.753188	0.424	0.703	4.26491e-33	IGFBP7 antisense RNA 1 [Source:HGNC Symbol;Acc:HGNC:40296]	0	Radial Glia
LDHA	2.10389e-35	0.949203	0.659	0.477	4.41607e-31	lactate dehydrogenase A [Source:HGNC Symbol;Acc:HGNC:6535]	0	Radial Glia
PABPC4	2.15226e-35	0.430867	0.675	0.565	4.5176e-31	poly(A) binding protein cytoplasmic 4 [Source:HGNC Symbol;Acc:HGNC:8557]	0	Radial Glia
POLE4	4.38955e-35	-0.367549	0.302	0.592	9.21366e-31	DNA polymerase epsilon 4, accessory subunit [Source:HGNC Symbol;Acc:HGNC:18755]	0	Radial Glia
NPTX2	5.47035e-35	-0.492044	0.153	0.419	1.14823e-30	neuronal pentraxin 2 [Source:HGNC Symbol;Acc:HGNC:7953]	0	Radial Glia
C2orf40	6.4009e-35	-0.478781	0.286	0.571	1.34355e-30	NA	0	Radial Glia
SNORA76	1.05309e-33	0.437517	0.709	0.572	2.21044e-29	NA	0	Radial Glia
PSMC1	1.3933e-33	0.369952	0.862	0.836	2.92453e-29	proteasome 26S subunit, ATPase 1 [Source:HGNC Symbol;Acc:HGNC:9547]	0	Radial Glia
METAP2	4.18491e-33	0.369952	0.923	0.901	8.78412e-29	methionyl aminopeptidase 2 [Source:HGNC Symbol;Acc:HGNC:16672]	0	Radial Glia
TTYH1	6.65061e-33	0.46418	0.986	0.954	1.39596e-28	tweety family member 1 [Source:HGNC Symbol;Acc:HGNC:13476]	0	Radial Glia
CETN3	1.58496e-32	0.367745	0.705	0.606	3.32683e-28	centrin 3 [Source:HGNC Symbol;Acc:HGNC:1868]	0	Radial Glia
SNAPC1	2.06933e-32	-0.322392	0.207	0.476	4.34353e-28	small nuclear RNA activating complex polypeptide 1 [Source:HGNC Symbol;Acc:HGNC:11134]	0	Radial Glia
HNRNPM	3.82573e-32	0.445946	0.958	0.958	8.03021e-28	heterogeneous nuclear ribonucleoprotein M [Source:HGNC Symbol;Acc:HGNC:5046]	0	Radial Glia
LRRTM1	3.93836e-32	0.517452	0.622	0.458	8.26661e-28	leucine rich repeat transmembrane neuronal 1 [Source:HGNC Symbol;Acc:HGNC:19408]	0	Radial Glia
MT-ND3	5.73391e-32	-0.371904	0.997	0.997	1.20355e-27	mitochondrially encoded NADH:ubiquinone oxidoreductase core subunit 3 [Source:HGNC Symbol;Acc:HGNC:7458]	0	Radial Glia
AP2B1	1.25449e-31	0.347765	0.865	0.829	2.63317e-27	adaptor related protein complex 2 subunit beta 1 [Source:HGNC Symbol;Acc:HGNC:563]	0	Radial Glia
PKIB	2.53333e-31	0.319761	0.311	0.099	5.31747e-27	cAMP-dependent protein kinase inhibitor beta [Source:HGNC Symbol;Acc:HGNC:9018]	0	Radial Glia
PRMT2	2.52496e-30	0.395411	0.882	0.837	5.2999e-26	protein arginine methyltransferase 2 [Source:HGNC Symbol;Acc:HGNC:5186]	0	Radial Glia
RP4-665J23.1	3.86112e-30	0.291118	0.252	0.072	8.10449e-26	NA	0	Radial Glia
GPC3	3.30276e-29	-0.620486	0.497	0.719	6.9325e-25	glypican 3 [Source:HGNC Symbol;Acc:HGNC:4451]	0	Radial Glia
PSMD14	6.89491e-27	0.347795	0.823	0.781	1.44724e-22	proteasome 26S subunit, non-ATPase 14 [Source:HGNC Symbol;Acc:HGNC:16889]	0	Radial Glia
JUNB	1.75745e-26	-0.584019	0.512	0.731	3.6889e-22	JunB proto-oncogene, AP-1 transcription factor subunit [Source:HGNC Symbol;Acc:HGNC:6205]	0	Radial Glia
SLC5A12	2.04962e-26	0.339993	0.408	0.231	4.30216e-22	solute carrier family 5 member 12 [Source:HGNC Symbol;Acc:HGNC:28750]	0	Radial Glia
IAH1	6.88898e-26	0.364687	0.592	0.417	1.446e-21	isoamyl acetate hydrolyzing esterase 1 (putative) [Source:HGNC Symbol;Acc:HGNC:27696]	0	Radial Glia
MPHOSPH6	8.17524e-26	0.351131	0.761	0.694	1.71598e-21	M-phase phosphoprotein 6 [Source:HGNC Symbol;Acc:HGNC:7214]	0	Radial Glia
GPR39	8.66357e-26	-0.421545	0.172	0.401	1.81848e-21	G protein-coupled receptor 39 [Source:HGNC Symbol;Acc:HGNC:4496]	0	Radial Glia
EFEMP1	2.16834e-24	-0.495085	0.452	0.696	4.55134e-20	EGF containing fibulin extracellular matrix protein 1 [Source:HGNC Symbol;Acc:HGNC:3218]	0	Radial Glia
DPYSL2	3.1065e-24	0.344251	0.952	0.942	6.52054e-20	dihydropyrimidinase like 2 [Source:HGNC Symbol;Acc:HGNC:3014]	0	Radial Glia
BZW1	6.45701e-24	0.301271	0.921	0.924	1.35533e-19	basic leucine zipper and W2 domains 1 [Source:HGNC Symbol;Acc:HGNC:18380]	0	Radial Glia
IST1	1.1175e-23	0.283658	0.693	0.667	2.34564e-19	IST1 factor associated with ESCRT-III [Source:HGNC Symbol;Acc:HGNC:28977]	0	Radial Glia
KRTCAP2	1.32643e-23	-0.282882	0.382	0.623	2.78417e-19	keratinocyte associated protein 2 [Source:HGNC Symbol;Acc:HGNC:28942]	0	Radial Glia
LRRN3	7.36631e-23	-0.429057	0.477	0.71	1.54619e-18	leucine rich repeat neuronal 3 [Source:HGNC Symbol;Acc:HGNC:17200]	0	Radial Glia
SPARCL1	1.68888e-22	-0.635624	0.821	0.886	3.54496e-18	SPARC like 1 [Source:HGNC Symbol;Acc:HGNC:11220]	0	Radial Glia
GAP43	2.61008e-22	0.5101	0.812	0.704	5.47856e-18	growth associated protein 43 [Source:HGNC Symbol;Acc:HGNC:4140]	0	Radial Glia
THOC1	3.83761e-22	0.305524	0.415	0.265	8.05513e-18	THO complex 1 [Source:HGNC Symbol;Acc:HGNC:19070]	0	Radial Glia
FXR1	4.33193e-22	0.304556	0.96	0.942	9.09272e-18	FMR1 autosomal homolog 1 [Source:HGNC Symbol;Acc:HGNC:4023]	0	Radial Glia
PCSK1N	5.55696e-22	-0.401282	0.91	0.973	1.1664e-17	proprotein convertase subtilisin/kexin type 1 inhibitor [Source:HGNC Symbol;Acc:HGNC:17301]	0	Radial Glia
SLC44A2	7.31206e-22	0.28324	0.698	0.655	1.5348e-17	solute carrier family 44 member 2 [Source:HGNC Symbol;Acc:HGNC:17292]	0	Radial Glia
ZNF711	2.12308e-21	0.262494	0.646	0.632	4.45634e-17	zinc finger protein 711 [Source:HGNC Symbol;Acc:HGNC:13128]	0	Radial Glia
TLE4	3.61367e-21	0.380648	0.98	0.96	7.58509e-17	TLE family member 4, transcriptional corepressor [Source:HGNC Symbol;Acc:HGNC:11840]	0	Radial Glia
TUBB	4.64534e-21	0.404523	0.993	0.994	9.75057e-17	tubulin beta class I [Source:HGNC Symbol;Acc:HGNC:20778]	0	Radial Glia
RPL27A	4.86752e-21	-0.298338	0.993	0.997	1.02169e-16	ribosomal protein L27a [Source:HGNC Symbol;Acc:HGNC:10329]	0	Radial Glia
KIRREL2	5.29357e-21	0.303295	0.388	0.236	1.11112e-16	kirre like nephrin family adhesion molecule 2 [Source:HGNC Symbol;Acc:HGNC:18816]	0	Radial Glia
SLC16A9	8.72702e-21	-0.312027	0.439	0.664	1.8318e-16	solute carrier family 16 member 9 [Source:HGNC Symbol;Acc:HGNC:23520]	0	Radial Glia
NCBP2	1.31635e-20	0.28874	0.791	0.75	2.76302e-16	nuclear cap binding protein subunit 2 [Source:HGNC Symbol;Acc:HGNC:7659]	0	Radial Glia
FAM32A	1.93955e-20	0.303118	0.862	0.824	4.07112e-16	family with sequence similarity 32 member A [Source:HGNC Symbol;Acc:HGNC:24563]	0	Radial Glia
VAT1	2.49232e-20	0.304141	0.792	0.735	5.23138e-16	vesicle amine transport 1 [Source:HGNC Symbol;Acc:HGNC:16919]	0	Radial Glia
COL2A1	2.82627e-20	0.422318	0.448	0.286	5.93235e-16	collagen type II alpha 1 chain [Source:HGNC Symbol;Acc:HGNC:2200]	0	Radial Glia
LPAR2	6.13054e-20	0.269964	0.403	0.282	1.2868e-15	lysophosphatidic acid receptor 2 [Source:HGNC Symbol;Acc:HGNC:3168]	0	Radial Glia
VIPR2	1.29438e-19	0.377659	0.689	0.526	2.7169e-15	vasoactive intestinal peptide receptor 2 [Source:HGNC Symbol;Acc:HGNC:12695]	0	Radial Glia
RAB3B	4.61644e-19	0.312376	0.415	0.286	9.68991e-15	RAB3B, member RAS oncogene family [Source:HGNC Symbol;Acc:HGNC:9778]	0	Radial Glia
EGR1	5.63753e-19	-0.357262	0.418	0.632	1.18332e-14	early growth response 1 [Source:HGNC Symbol;Acc:HGNC:3238]	0	Radial Glia
RBM8A	1.40213e-18	0.274531	0.93	0.931	2.94307e-14	RNA binding motif protein 8A [Source:HGNC Symbol;Acc:HGNC:9905]	0	Radial Glia
COL3A1	1.87994e-18	-0.54219	0.238	0.426	3.94599e-14	collagen type III alpha 1 chain [Source:HGNC Symbol;Acc:HGNC:2201]	0	Radial Glia
PABPC1	1.90228e-18	0.312406	0.969	0.965	3.99288e-14	poly(A) binding protein cytoplasmic 1 [Source:HGNC Symbol;Acc:HGNC:8554]	0	Radial Glia
PCSK1	2.11823e-18	0.556161	0.514	0.315	4.44616e-14	proprotein convertase subtilisin/kexin type 1 [Source:HGNC Symbol;Acc:HGNC:8743]	0	Radial Glia
TSTD1	2.36694e-18	0.31634	0.653	0.518	4.96821e-14	thiosulfate sulfurtransferase like domain containing 1 [Source:HGNC Symbol;Acc:HGNC:35410]	0	Radial Glia
HSPA1A	3.08659e-18	0.339255	0.479	0.3	6.47875e-14	heat shock protein family A (Hsp70) member 1A [Source:HGNC Symbol;Acc:HGNC:5232]	0	Radial Glia
DLK1	8.52655e-18	0.567911	0.788	0.8	1.78972e-13	delta like non-canonical Notch ligand 1 [Source:HGNC Symbol;Acc:HGNC:2907]	0	Radial Glia
MARCKSL1	1.08205e-17	0.278849	1	0.999	2.27122e-13	MARCKS like 1 [Source:HGNC Symbol;Acc:HGNC:7142]	0	Radial Glia
CTGF	1.41259e-17	0.523107	0.853	0.727	2.96502e-13	NA	0	Radial Glia
PFN2	2.99914e-17	0.347534	0.938	0.899	6.2952e-13	profilin 2 [Source:HGNC Symbol;Acc:HGNC:8882]	0	Radial Glia
H1F0	3.54178e-17	0.370399	0.495	0.387	7.43419e-13	H1 histone family member 0 [Source:HGNC Symbol;Acc:HGNC:4714]	0	Radial Glia
STAT3	3.61224e-17	-0.321018	0.571	0.751	7.5821e-13	signal transducer and activator of transcription 3 [Source:HGNC Symbol;Acc:HGNC:11364]	0	Radial Glia
TBCA	6.77314e-17	0.250639	0.968	0.974	1.42168e-12	tubulin folding cofactor A [Source:HGNC Symbol;Acc:HGNC:11579]	0	Radial Glia
GAPDH	9.77747e-17	0.281641	1	1	2.05229e-12	glyceraldehyde-3-phosphate dehydrogenase [Source:HGNC Symbol;Acc:HGNC:4141]	0	Radial Glia
POSTN	1.02156e-16	-0.318156	0.084	0.228	2.14425e-12	periostin [Source:HGNC Symbol;Acc:HGNC:16953]	0	Radial Glia
FOS	1.05122e-16	-0.445476	0.851	0.926	2.2065e-12	Fos proto-oncogene, AP-1 transcription factor subunit [Source:HGNC Symbol;Acc:HGNC:3796]	0	Radial Glia
ENO2	1.06448e-16	0.253019	0.518	0.464	2.23433e-12	enolase 2 [Source:HGNC Symbol;Acc:HGNC:3353]	0	Radial Glia
APLP1	1.60041e-16	0.282257	0.909	0.873	3.35926e-12	amyloid beta precursor like protein 1 [Source:HGNC Symbol;Acc:HGNC:597]	0	Radial Glia
CBX3	2.12872e-16	0.266111	0.924	0.915	4.46818e-12	chromobox 3 [Source:HGNC Symbol;Acc:HGNC:1553]	0	Radial Glia
ZIC1	2.4024e-16	0.423869	0.626	0.521	5.04265e-12	Zic family member 1 [Source:HGNC Symbol;Acc:HGNC:12872]	0	Radial Glia
GNAI2	2.8531e-16	0.276943	0.973	0.962	5.98867e-12	G protein subunit alpha i2 [Source:HGNC Symbol;Acc:HGNC:4385]	0	Radial Glia
CHD7	2.93779e-16	0.263811	0.622	0.564	6.16643e-12	chromodomain helicase DNA binding protein 7 [Source:HGNC Symbol;Acc:HGNC:20626]	0	Radial Glia
NRARP	2.99423e-16	0.31378	0.434	0.341	6.28488e-12	NOTCH regulated ankyrin repeat protein [Source:HGNC Symbol;Acc:HGNC:33843]	0	Radial Glia
DYNC1I2	5.54515e-16	0.258843	0.928	0.926	1.16393e-11	dynein cytoplasmic 1 intermediate chain 2 [Source:HGNC Symbol;Acc:HGNC:2964]	0	Radial Glia
IGFBP5	9.84498e-16	-0.666633	0.737	0.85	2.06646e-11	insulin like growth factor binding protein 5 [Source:HGNC Symbol;Acc:HGNC:5474]	0	Radial Glia
MAP1B	1.2979e-15	0.276336	0.98	0.991	2.7243e-11	microtubule associated protein 1B [Source:HGNC Symbol;Acc:HGNC:6836]	0	Radial Glia
FDPS	1.4472e-15	0.313452	0.791	0.801	3.03768e-11	farnesyl diphosphate synthase [Source:HGNC Symbol;Acc:HGNC:3631]	0	Radial Glia
CYR61	1.68428e-15	0.404898	0.708	0.667	3.5353e-11	NA	0	Radial Glia
MIF	3.15296e-15	-0.293423	0.724	0.862	6.61806e-11	macrophage migration inhibitory factor [Source:HGNC Symbol;Acc:HGNC:7097]	0	Radial Glia
SOX11	4.32437e-15	0.258924	0.711	0.726	9.07686e-11	SRY-box transcription factor 11 [Source:HGNC Symbol;Acc:HGNC:11191]	0	Radial Glia
OLIG3	9.42701e-15	0.338649	0.613	0.474	1.97873e-10	oligodendrocyte transcription factor 3 [Source:HGNC Symbol;Acc:HGNC:18003]	0	Radial Glia
TNPO1	9.61859e-15	-0.301375	0.791	0.906	2.01894e-10	transportin 1 [Source:HGNC Symbol;Acc:HGNC:6401]	0	Radial Glia
PKM	1.22658e-14	0.297448	0.956	0.954	2.5746e-10	pyruvate kinase M1/2 [Source:HGNC Symbol;Acc:HGNC:9021]	0	Radial Glia
BEX1	1.39863e-14	0.312424	0.973	0.983	2.93572e-10	brain expressed X-linked 1 [Source:HGNC Symbol;Acc:HGNC:1036]	0	Radial Glia
VSTM2L	1.83412e-14	0.277432	0.421	0.29	3.84981e-10	V-set and transmembrane domain containing 2 like [Source:HGNC Symbol;Acc:HGNC:16096]	0	Radial Glia
SESN3	2.75254e-14	-0.252812	0.395	0.583	5.77759e-10	sestrin 3 [Source:HGNC Symbol;Acc:HGNC:23060]	0	Radial Glia
CDH11	3.01806e-14	-0.321156	0.387	0.573	6.33491e-10	cadherin 11 [Source:HGNC Symbol;Acc:HGNC:1750]	0	Radial Glia
NKAIN3	3.79136e-14	-0.324437	0.683	0.822	7.95807e-10	sodium/potassium transporting ATPase interacting 3 [Source:HGNC Symbol;Acc:HGNC:26829]	0	Radial Glia
MT-ATP6	4.58861e-14	-0.257757	0.997	0.997	9.63149e-10	mitochondrially encoded ATP synthase membrane subunit 6 [Source:HGNC Symbol;Acc:HGNC:7414]	0	Radial Glia
NES	5.75741e-14	0.453552	0.876	0.805	1.20848e-09	nestin [Source:HGNC Symbol;Acc:HGNC:7756]	0	Radial Glia
CRABP2	6.35159e-14	0.298216	0.688	0.587	1.3332e-09	cellular retinoic acid binding protein 2 [Source:HGNC Symbol;Acc:HGNC:2339]	0	Radial Glia
PREX1	7.31526e-14	0.254549	0.57	0.501	1.53547e-09	phosphatidylinositol-3,4,5-trisphosphate dependent Rac exchange factor 1 [Source:HGNC Symbol;Acc:HGNC:32594]	0	Radial Glia
HOXC12	7.86678e-14	-0.26071	0.801	0.921	1.65124e-09	homeobox C12 [Source:HGNC Symbol;Acc:HGNC:5124]	0	Radial Glia
TPPP3	1.33261e-13	0.26117	0.581	0.526	2.79716e-09	tubulin polymerization promoting protein family member 3 [Source:HGNC Symbol;Acc:HGNC:24162]	0	Radial Glia
HES6	1.53049e-13	0.656155	0.521	0.428	3.2125e-09	hes family bHLH transcription factor 6 [Source:HGNC Symbol;Acc:HGNC:18254]	0	Radial Glia
WNT4	2.27522e-13	0.381011	0.512	0.386	4.77569e-09	Wnt family member 4 [Source:HGNC Symbol;Acc:HGNC:12783]	0	Radial Glia
HES4	3.06307e-13	0.270571	0.937	0.879	6.42939e-09	hes family bHLH transcription factor 4 [Source:HGNC Symbol;Acc:HGNC:24149]	0	Radial Glia
TPI1	3.8692e-13	0.284212	0.995	0.995	8.12145e-09	triosephosphate isomerase 1 [Source:HGNC Symbol;Acc:HGNC:12009]	0	Radial Glia
RBP4	5.88223e-13	-0.475861	0.876	0.901	1.23468e-08	retinol binding protein 4 [Source:HGNC Symbol;Acc:HGNC:9922]	0	Radial Glia
DNER	1.0691e-12	0.275871	0.7	0.633	2.24403e-08	delta/notch like EGF repeat containing [Source:HGNC Symbol;Acc:HGNC:24456]	0	Radial Glia
STMN1	1.53582e-12	0.263058	0.995	0.996	3.22368e-08	stathmin 1 [Source:HGNC Symbol;Acc:HGNC:6510]	0	Radial Glia
IGFBP2	1.61922e-12	0.263842	1	0.995	3.39875e-08	insulin like growth factor binding protein 2 [Source:HGNC Symbol;Acc:HGNC:5471]	0	Radial Glia
AK1	1.75501e-12	-0.261601	0.89	0.954	3.68376e-08	adenylate kinase 1 [Source:HGNC Symbol;Acc:HGNC:361]	0	Radial Glia
PGAM1	9.05885e-12	0.263255	0.847	0.809	1.90145e-07	phosphoglycerate mutase 1 [Source:HGNC Symbol;Acc:HGNC:8888]	0	Radial Glia
HMGCS1	2.77828e-11	0.330191	0.552	0.537	5.83161e-07	3-hydroxy-3-methylglutaryl-CoA synthase 1 [Source:HGNC Symbol;Acc:HGNC:5007]	0	Radial Glia
ID2	3.35505e-11	-0.296545	0.784	0.891	7.04225e-07	inhibitor of DNA binding 2 [Source:HGNC Symbol;Acc:HGNC:5361]	0	Radial Glia
KCNK12	5.12313e-11	0.291394	0.33	0.224	1.07534e-06	potassium two pore domain channel subfamily K member 12 [Source:HGNC Symbol;Acc:HGNC:6274]	0	Radial Glia
MSMO1	6.99644e-11	0.283982	0.621	0.596	1.46855e-06	methylsterol monooxygenase 1 [Source:HGNC Symbol;Acc:HGNC:10545]	0	Radial Glia
HIST1H4C	7.3295e-11	-0.350387	0.938	0.968	1.53846e-06	histone cluster 1 H4 family member c [Source:HGNC Symbol;Acc:HGNC:4787]	0	Radial Glia
SYT1	7.41095e-11	0.262115	0.511	0.424	1.55556e-06	synaptotagmin 1 [Source:HGNC Symbol;Acc:HGNC:11509]	0	Radial Glia
COL21A1	1.11393e-10	-0.260494	0.086	0.194	2.33813e-06	collagen type XXI alpha 1 chain [Source:HGNC Symbol;Acc:HGNC:17025]	0	Radial Glia
ACAT2	1.24133e-10	0.346085	0.496	0.424	2.60555e-06	acetyl-CoA acetyltransferase 2 [Source:HGNC Symbol;Acc:HGNC:94]	0	Radial Glia
CLU	1.25518e-10	-0.321562	0.871	0.926	2.63463e-06	clusterin [Source:HGNC Symbol;Acc:HGNC:2095]	0	Radial Glia
SIL1	1.41101e-10	-0.289173	0.698	0.817	2.96171e-06	SIL1 nucleotide exchange factor [Source:HGNC Symbol;Acc:HGNC:24624]	0	Radial Glia
COL1A2	1.43609e-10	0.313646	0.848	0.782	3.01434e-06	collagen type I alpha 2 chain [Source:HGNC Symbol;Acc:HGNC:2198]	0	Radial Glia
NKAIN4	1.98834e-10	0.256742	0.771	0.722	4.17353e-06	sodium/potassium transporting ATPase interacting 4 [Source:HGNC Symbol;Acc:HGNC:16191]	0	Radial Glia
TUBB2A	2.18019e-10	0.324851	0.893	0.881	4.57622e-06	tubulin beta 2A class IIa [Source:HGNC Symbol;Acc:HGNC:12412]	0	Radial Glia
TMSB15A	7.87443e-10	0.339195	0.575	0.468	1.65284e-05	thymosin beta 15a [Source:HGNC Symbol;Acc:HGNC:30744]	0	Radial Glia
SOCS3	1.03122e-09	-0.258657	0.294	0.44	2.16454e-05	suppressor of cytokine signaling 3 [Source:HGNC Symbol;Acc:HGNC:19391]	0	Radial Glia
PEG10	1.34911e-09	0.310275	0.981	0.974	2.83178e-05	paternally expressed 10 [Source:HGNC Symbol;Acc:HGNC:14005]	0	Radial Glia
DDIT4	1.36733e-09	0.303805	0.535	0.508	2.87002e-05	DNA damage inducible transcript 4 [Source:HGNC Symbol;Acc:HGNC:24944]	0	Radial Glia
HSPA5	3.67413e-09	0.267005	0.994	0.987	7.71201e-05	heat shock protein family A (Hsp70) member 5 [Source:HGNC Symbol;Acc:HGNC:5238]	0	Radial Glia
FDFT1	3.93468e-09	0.295417	0.703	0.642	8.2589e-05	farnesyl-diphosphate farnesyltransferase 1 [Source:HGNC Symbol;Acc:HGNC:3629]	0	Radial Glia
FDFT1	3.93468e-09	0.295417	0.703	0.642	8.2589e-05	farnesyl-diphosphate farnesyltransferase 1 [Source:NCBI gene;Acc:2222]	0	Radial Glia
DKK1	4.28142e-09	-0.406334	0.231	0.367	8.98671e-05	dickkopf WNT signaling pathway inhibitor 1 [Source:HGNC Symbol;Acc:HGNC:2891]	0	Radial Glia
C1orf192	7.21529e-09	-0.253361	0.31	0.451	0.000151449	NA	0	Radial Glia
ACTB	1.00619e-08	0.26745	1	0.999	0.000211199	actin beta [Source:HGNC Symbol;Acc:HGNC:132]	0	Radial Glia
COLEC12	1.21886e-08	-0.296713	0.36	0.497	0.000255839	collectin subfamily member 12 [Source:HGNC Symbol;Acc:HGNC:16016]	0	Radial Glia
TMEM158	1.29073e-08	0.260025	0.287	0.218	0.000270924	transmembrane protein 158 (gene/pseudogene) [Source:HGNC Symbol;Acc:HGNC:30293]	0	Radial Glia
SFRP2	2.0987e-08	-0.319306	0.283	0.397	0.000440516	secreted frizzled related protein 2 [Source:HGNC Symbol;Acc:HGNC:10777]	0	Radial Glia
BCYRN1	4.08742e-08	0.545987	0.658	0.635	0.000857949	brain cytoplasmic RNA 1 [Source:HGNC Symbol;Acc:HGNC:1022]	0	Radial Glia
IFITM3	4.18935e-08	-0.257356	0.43	0.568	0.000879344	interferon induced transmembrane protein 3 [Source:HGNC Symbol;Acc:HGNC:5414]	0	Radial Glia
SPRR2F	6.39904e-08	0.544656	0.269	0.164	0.00134316	small proline rich protein 2F [Source:HGNC Symbol;Acc:HGNC:11266]	0	Radial Glia
CNTNAP2	1.05882e-07	0.252406	0.786	0.733	0.00222246	contactin associated protein like 2 [Source:HGNC Symbol;Acc:HGNC:13830]	0	Radial Glia
PGK1	1.60541e-07	0.295066	0.89	0.897	0.00336975	phosphoglycerate kinase 1 [Source:HGNC Symbol;Acc:HGNC:8896]	0	Radial Glia
LMO4	1.71947e-07	0.262236	0.889	0.883	0.00360917	LIM domain only 4 [Source:HGNC Symbol;Acc:HGNC:6644]	0	Radial Glia
APCDD1	7.58632e-07	0.250943	0.967	0.958	0.0159237	APC down-regulated 1 [Source:HGNC Symbol;Acc:HGNC:15718]	0	Radial Glia
NNAT	1.62111e-126	-1.39423	0.264	0.941	3.40271e-122	neuronatin [Source:HGNC Symbol;Acc:HGNC:7860]	2	Radial Glia
RBMX	5.16315e-94	0.731058	1	0.998	1.08375e-89	RNA binding motif protein X-linked [Source:HGNC Symbol;Acc:HGNC:9910]	2	Radial Glia
TAF9B	7.86623e-85	-0.402839	0	0.364	1.65112e-80	TATA-box binding protein associated factor 9b [Source:HGNC Symbol;Acc:HGNC:17306]	2	Radial Glia
PEG3	7.10877e-69	0.696506	0.386	0	1.49213e-64	paternally expressed 3 [Source:HGNC Symbol;Acc:HGNC:8826]	2	Radial Glia
MTRNR2L12	9.88062e-60	-0.756789	0.724	0.96	2.07394e-55	MT-RNR2 like 12 [Source:HGNC Symbol;Acc:HGNC:37169]	2	Radial Glia
GNPDA1	2.54113e-38	-0.384154	0.126	0.463	5.33383e-34	glucosamine-6-phosphate deaminase 1 [Source:HGNC Symbol;Acc:HGNC:4417]	2	Radial Glia
NPTX2	2.7656e-38	-0.589872	0.068	0.371	5.80499e-34	neuronal pentraxin 2 [Source:HGNC Symbol;Acc:HGNC:7953]	2	Radial Glia
EMC4	2.35796e-35	-0.479766	0.523	0.856	4.94937e-31	ER membrane protein complex subunit 4 [Source:HGNC Symbol;Acc:HGNC:28032]	2	Radial Glia
PKIB	1.14411e-33	0.389067	0.277	0.025	2.40149e-29	cAMP-dependent protein kinase inhibitor beta [Source:HGNC Symbol;Acc:HGNC:9018]	2	Radial Glia
ARMCX1	7.74682e-33	-0.320761	0.053	0.309	1.62606e-28	armadillo repeat containing X-linked 1 [Source:HGNC Symbol;Acc:HGNC:18073]	2	Radial Glia
PCDHB5	1.22336e-32	0.359354	0.277	0.025	2.56783e-28	protocadherin beta 5 [Source:HGNC Symbol;Acc:HGNC:8690]	2	Radial Glia
GSTT1	9.28093e-29	-0.397791	0.269	0.601	1.94807e-24	glutathione S-transferase theta 1 [Source:HGNC Symbol;Acc:HGNC:4641]	2	Radial Glia
SNORA76	4.44008e-28	0.498644	0.664	0.557	9.31973e-24	NA	2	Radial Glia
ATP5J2	1.83764e-27	0.446263	0.966	0.946	3.8572e-23	NA	2	Radial Glia
SNAPC1	2.30085e-26	-0.343473	0.197	0.5	4.82949e-22	small nuclear RNA activating complex polypeptide 1 [Source:HGNC Symbol;Acc:HGNC:11134]	2	Radial Glia
MT-ND3	1.24095e-25	-0.500903	0.991	0.998	2.60476e-21	mitochondrially encoded NADH:ubiquinone oxidoreductase core subunit 3 [Source:HGNC Symbol;Acc:HGNC:7458]	2	Radial Glia
RP4-665J23.1	1.60121e-25	0.633229	0.493	0.267	3.36095e-21	NA	2	Radial Glia
PEG10	3.24719e-25	0.681589	0.982	0.968	6.81586e-21	paternally expressed 10 [Source:HGNC Symbol;Acc:HGNC:14005]	2	Radial Glia
CBR1	1.08822e-23	0.251253	0.187	0.01	2.28417e-19	carbonyl reductase 1 [Source:HGNC Symbol;Acc:HGNC:1548]	2	Radial Glia
THOC1	2.04938e-22	0.429979	0.493	0.322	4.30164e-18	THO complex 1 [Source:HGNC Symbol;Acc:HGNC:19070]	2	Radial Glia
PABPC1	2.4285e-22	0.435478	0.976	0.968	5.09743e-18	poly(A) binding protein cytoplasmic 1 [Source:HGNC Symbol;Acc:HGNC:8554]	2	Radial Glia
METAP2	3.08409e-22	0.383348	0.949	0.958	6.47351e-18	methionyl aminopeptidase 2 [Source:HGNC Symbol;Acc:HGNC:16672]	2	Radial Glia
HNRNPM	1.66359e-21	0.463196	0.984	0.99	3.49187e-17	heterogeneous nuclear ribonucleoprotein M [Source:HGNC Symbol;Acc:HGNC:5046]	2	Radial Glia
LDHA	4.4049e-21	0.941913	0.682	0.502	9.24589e-17	lactate dehydrogenase A [Source:HGNC Symbol;Acc:HGNC:6535]	2	Radial Glia
PSMD14	9.73814e-20	0.370301	0.893	0.861	2.04404e-15	proteasome 26S subunit, non-ATPase 14 [Source:HGNC Symbol;Acc:HGNC:16889]	2	Radial Glia
MEST	1.0942e-19	0.439493	0.974	0.988	2.29673e-15	mesoderm specific transcript [Source:HGNC Symbol;Acc:HGNC:7028]	2	Radial Glia
H1F0	1.62126e-19	0.514	0.454	0.26	3.40302e-15	H1 histone family member 0 [Source:HGNC Symbol;Acc:HGNC:4714]	2	Radial Glia
MPHOSPH6	2.03835e-19	0.402032	0.78	0.713	4.2785e-15	M-phase phosphoprotein 6 [Source:HGNC Symbol;Acc:HGNC:7214]	2	Radial Glia
ZNF711	2.57419e-19	0.291427	0.65	0.653	5.40323e-15	zinc finger protein 711 [Source:HGNC Symbol;Acc:HGNC:13128]	2	Radial Glia
BLCAP	2.4423e-18	0.4413	0.607	0.525	5.12638e-14	BLCAP apoptosis inducing factor [Source:HGNC Symbol;Acc:HGNC:1055]	2	Radial Glia
POLE4	3.28526e-18	-0.281901	0.303	0.564	6.89576e-14	DNA polymerase epsilon 4, accessory subunit [Source:HGNC Symbol;Acc:HGNC:18755]	2	Radial Glia
NTM	4.93714e-18	0.942257	0.555	0.394	1.0363e-13	neurotrimin [Source:HGNC Symbol;Acc:HGNC:17941]	2	Radial Glia
PSMC1	1.06315e-17	0.37779	0.862	0.817	2.23156e-13	proteasome 26S subunit, ATPase 1 [Source:HGNC Symbol;Acc:HGNC:9547]	2	Radial Glia
NCBP2	1.95805e-17	0.321784	0.834	0.834	4.10994e-13	nuclear cap binding protein subunit 2 [Source:HGNC Symbol;Acc:HGNC:7659]	2	Radial Glia
PRMT2	1.98938e-17	0.291446	0.707	0.733	4.17571e-13	protein arginine methyltransferase 2 [Source:HGNC Symbol;Acc:HGNC:5186]	2	Radial Glia
FAM32A	2.29294e-17	0.354557	0.858	0.834	4.81288e-13	family with sequence similarity 32 member A [Source:HGNC Symbol;Acc:HGNC:24563]	2	Radial Glia
ATIC	3.18564e-17	0.266586	0.35	0.26	6.68666e-13	5-aminoimidazole-4-carboxamide ribonucleotide formyltransferase/IMP cyclohydrolase [Source:HGNC Symbol;Acc:HGNC:794]	2	Radial Glia
TCEAL8	4.57307e-17	0.282423	0.751	0.755	9.59887e-13	transcription elongation factor A like 8 [Source:HGNC Symbol;Acc:HGNC:28683]	2	Radial Glia
7SK.2	1.08769e-16	-0.308961	0.527	0.77	2.28307e-12	NA	2	Radial Glia
PABPC4	1.22111e-16	0.356839	0.769	0.693	2.5631e-12	poly(A) binding protein cytoplasmic 4 [Source:HGNC Symbol;Acc:HGNC:8557]	2	Radial Glia
TLE4	4.23821e-16	0.432796	0.952	0.923	8.896e-12	TLE family member 4, transcriptional corepressor [Source:HGNC Symbol;Acc:HGNC:11840]	2	Radial Glia
GPC3	9.30748e-16	-0.421338	0.548	0.777	1.95364e-11	glypican 3 [Source:HGNC Symbol;Acc:HGNC:4451]	2	Radial Glia
SLITRK2	2.37273e-15	-0.267474	0.242	0.47	4.98037e-11	SLIT and NTRK like family member 2 [Source:HGNC Symbol;Acc:HGNC:13449]	2	Radial Glia
NMT1	3.36615e-15	0.310423	0.708	0.676	7.06555e-11	N-myristoyltransferase 1 [Source:HGNC Symbol;Acc:HGNC:7857]	2	Radial Glia
MT-ATP8	3.83353e-15	0.257902	0.861	0.908	8.04658e-11	mitochondrially encoded ATP synthase membrane subunit 8 [Source:HGNC Symbol;Acc:HGNC:7415]	2	Radial Glia
IGDCC3	6.28077e-15	0.435002	0.733	0.636	1.31833e-10	immunoglobulin superfamily DCC subclass member 3 [Source:HGNC Symbol;Acc:HGNC:9700]	2	Radial Glia
MT-CO2	1.63327e-14	-0.339944	0.997	1	3.42823e-10	mitochondrially encoded cytochrome c oxidase II [Source:HGNC Symbol;Acc:HGNC:7421]	2	Radial Glia
MT-ATP6	2.06136e-14	-0.387144	0.997	0.998	4.32679e-10	mitochondrially encoded ATP synthase membrane subunit 6 [Source:HGNC Symbol;Acc:HGNC:7414]	2	Radial Glia
CBX3	5.2449e-14	0.335866	0.969	0.955	1.10091e-09	chromobox 3 [Source:HGNC Symbol;Acc:HGNC:1553]	2	Radial Glia
DLL3	7.58993e-14	0.785604	0.687	0.542	1.59313e-09	delta like canonical Notch ligand 3 [Source:HGNC Symbol;Acc:HGNC:2909]	2	Radial Glia
IAH1	8.02135e-14	0.287182	0.484	0.376	1.68368e-09	isoamyl acetate hydrolyzing esterase 1 (putative) [Source:HGNC Symbol;Acc:HGNC:27696]	2	Radial Glia
VSTM2L	1.10717e-13	0.26483	0.559	0.525	2.32395e-09	V-set and transmembrane domain containing 2 like [Source:HGNC Symbol;Acc:HGNC:16096]	2	Radial Glia
MIF	2.15185e-13	-0.295207	0.693	0.876	4.51673e-09	macrophage migration inhibitory factor [Source:HGNC Symbol;Acc:HGNC:7097]	2	Radial Glia
CITED2	2.90269e-13	0.35412	0.857	0.822	6.09274e-09	Cbp/p300 interacting transactivator with Glu/Asp rich carboxy-terminal domain 2 [Source:HGNC Symbol;Acc:HGNC:1987]	2	Radial Glia
RPL27A	3.65788e-13	-0.289129	0.992	0.998	7.6779e-09	ribosomal protein L27a [Source:HGNC Symbol;Acc:HGNC:10329]	2	Radial Glia
TSTD1	3.95977e-13	0.292827	0.413	0.319	8.31155e-09	thiosulfate sulfurtransferase like domain containing 1 [Source:HGNC Symbol;Acc:HGNC:35410]	2	Radial Glia
CETN3	6.06152e-13	0.281222	0.591	0.54	1.27231e-08	centrin 3 [Source:HGNC Symbol;Acc:HGNC:1868]	2	Radial Glia
PCBP4	1.26602e-12	0.300426	0.707	0.718	2.65737e-08	poly(rC) binding protein 4 [Source:HGNC Symbol;Acc:HGNC:8652]	2	Radial Glia
GOLGA2	1.92972e-12	0.279631	0.493	0.433	4.05049e-08	golgin A2 [Source:HGNC Symbol;Acc:HGNC:4425]	2	Radial Glia
MYCL	1.12277e-11	0.332629	0.611	0.532	2.35668e-07	MYCL proto-oncogene, bHLH transcription factor [Source:HGNC Symbol;Acc:HGNC:7555]	2	Radial Glia
TBCA	1.40989e-11	0.29261	0.974	0.965	2.95935e-07	tubulin folding cofactor A [Source:HGNC Symbol;Acc:HGNC:11579]	2	Radial Glia
LRRC42	1.52103e-11	0.328386	0.733	0.728	3.19265e-07	leucine rich repeat containing 42 [Source:HGNC Symbol;Acc:HGNC:28792]	2	Radial Glia
RBP1	8.25197e-11	0.457612	0.557	0.453	1.73209e-06	retinol binding protein 1 [Source:HGNC Symbol;Acc:HGNC:9919]	2	Radial Glia
CAMK1G	1.08354e-10	0.43648	0.402	0.302	2.27434e-06	calcium/calmodulin dependent protein kinase IG [Source:HGNC Symbol;Acc:HGNC:14585]	2	Radial Glia
BCYRN1	1.39363e-10	0.641891	0.758	0.666	2.92522e-06	brain cytoplasmic RNA 1 [Source:HGNC Symbol;Acc:HGNC:1022]	2	Radial Glia
BEX1	2.72694e-10	0.310566	0.991	0.97	5.72384e-06	brain expressed X-linked 1 [Source:HGNC Symbol;Acc:HGNC:1036]	2	Radial Glia
RERE	3.35512e-10	0.265437	0.813	0.807	7.04241e-06	arginine-glutamic acid dipeptide repeats [Source:HGNC Symbol;Acc:HGNC:9965]	2	Radial Glia
TMEM158	7.20031e-10	0.304862	0.693	0.653	1.51134e-05	transmembrane protein 158 (gene/pseudogene) [Source:HGNC Symbol;Acc:HGNC:30293]	2	Radial Glia
RP11-357H14.17	1.31425e-09	0.312075	0.785	0.738	2.75862e-05	NA	2	Radial Glia
ATF4	2.27386e-09	0.251116	0.788	0.765	4.77283e-05	activating transcription factor 4 [Source:HGNC Symbol;Acc:HGNC:786]	2	Radial Glia
BZW2	2.65917e-09	0.265606	0.678	0.639	5.5816e-05	basic leucine zipper and W2 domains 2 [Source:HGNC Symbol;Acc:HGNC:18808]	2	Radial Glia
DLL1	2.72479e-09	0.404516	0.643	0.579	5.71933e-05	delta like canonical Notch ligand 1 [Source:HGNC Symbol;Acc:HGNC:2908]	2	Radial Glia
BTBD17	6.85045e-09	0.262672	0.432	0.418	0.000143791	BTB domain containing 17 [Source:HGNC Symbol;Acc:HGNC:33758]	2	Radial Glia
JUNB	9.72792e-09	-0.293064	0.202	0.361	0.000204189	JunB proto-oncogene, AP-1 transcription factor subunit [Source:HGNC Symbol;Acc:HGNC:6205]	2	Radial Glia
ELAVL4	1.05746e-08	0.277635	0.426	0.322	0.000221961	ELAV like RNA binding protein 4 [Source:HGNC Symbol;Acc:HGNC:3315]	2	Radial Glia
DUSP4	1.2101e-08	0.335367	0.647	0.574	0.000253999	dual specificity phosphatase 4 [Source:HGNC Symbol;Acc:HGNC:3070]	2	Radial Glia
FOS	1.56452e-08	-0.345224	0.511	0.688	0.000328392	Fos proto-oncogene, AP-1 transcription factor subunit [Source:HGNC Symbol;Acc:HGNC:3796]	2	Radial Glia
PRAC1	1.93629e-08	0.288978	0.766	0.7	0.000406428	PRAC1 small nuclear protein [Source:HGNC Symbol;Acc:HGNC:30591]	2	Radial Glia
HOXC12	2.33749e-08	-0.250793	0.571	0.74	0.00049064	homeobox C12 [Source:HGNC Symbol;Acc:HGNC:5124]	2	Radial Glia
LY6H	3.32228e-08	-0.32411	0.239	0.401	0.000697346	lymphocyte antigen 6 family member H [Source:HGNC Symbol;Acc:HGNC:6728]	2	Radial Glia
HES6	4.23821e-08	0.276321	0.974	0.97	0.0008896	hes family bHLH transcription factor 6 [Source:HGNC Symbol;Acc:HGNC:18254]	2	Radial Glia
HES1	4.28506e-08	0.323308	0.709	0.743	0.000899433	hes family bHLH transcription factor 1 [Source:HGNC Symbol;Acc:HGNC:5192]	2	Radial Glia
SOX3	4.35663e-08	0.275491	0.276	0.173	0.000914457	SRY-box transcription factor 3 [Source:HGNC Symbol;Acc:HGNC:11199]	2	Radial Glia
OLIG3	7.39594e-08	0.297209	0.871	0.812	0.00155241	oligodendrocyte transcription factor 3 [Source:HGNC Symbol;Acc:HGNC:18003]	2	Radial Glia
SRGAP1	7.97548e-08	0.269077	0.509	0.495	0.00167405	SLIT-ROBO Rho GTPase activating protein 1 [Source:HGNC Symbol;Acc:HGNC:17382]	2	Radial Glia
TPI1	1.68655e-07	0.265929	0.99	0.993	0.00354007	triosephosphate isomerase 1 [Source:HGNC Symbol;Acc:HGNC:12009]	2	Radial Glia
PTN	2.22944e-07	-0.484706	0.445	0.606	0.0046796	pleiotrophin [Source:HGNC Symbol;Acc:HGNC:9630]	2	Radial Glia
HOXB9	3.23135e-07	0.278849	0.772	0.75	0.0067826	homeobox B9 [Source:HGNC Symbol;Acc:HGNC:5120]	2	Radial Glia
SPOCK1	5.27017e-07	0.367078	0.474	0.379	0.0110621	SPARC (osteonectin), cwcv and kazal like domains proteoglycan 1 [Source:HGNC Symbol;Acc:HGNC:11251]	2	Radial Glia
SRRM4	5.63479e-07	0.329593	0.339	0.262	0.0118274	serine/arginine repetitive matrix 4 [Source:HGNC Symbol;Acc:HGNC:29389]	2	Radial Glia
HIST1H4C	7.28595e-07	-0.395788	0.853	0.923	0.0152932	histone cluster 1 H4 family member c [Source:HGNC Symbol;Acc:HGNC:4787]	2	Radial Glia
CYR61	1.0317e-06	0.29656	0.555	0.515	0.0216553	NA	2	Radial Glia
CDO1	1.16669e-06	-0.251231	0.692	0.822	0.0244888	cysteine dioxygenase type 1 [Source:HGNC Symbol;Acc:HGNC:1795]	2	Radial Glia
GNG11	1.50155e-06	-0.277386	0.627	0.765	0.0315174	G protein subunit gamma 11 [Source:HGNC Symbol;Acc:HGNC:4403]	2	Radial Glia
DDIT4	1.88799e-06	0.290203	0.629	0.631	0.0396288	DNA damage inducible transcript 4 [Source:HGNC Symbol;Acc:HGNC:24944]	2	Radial Glia
PEG3	1.32311e-194	1.45689	0.72	0	2.7772e-190	paternally expressed 3 [Source:HGNC Symbol;Acc:HGNC:8826]	3	Radial Glia
TAF9B	2.04101e-74	-0.328868	0.001	0.337	4.28407e-70	TATA-box binding protein associated factor 9b [Source:HGNC Symbol;Acc:HGNC:17306]	3	Radial Glia
NNAT	7.11554e-72	-1.06137	0.171	0.658	1.49355e-67	neuronatin [Source:HGNC Symbol;Acc:HGNC:7860]	3	Radial Glia
ARMCX1	6.50983e-67	-0.495994	0.077	0.497	1.36641e-62	armadillo repeat containing X-linked 1 [Source:HGNC Symbol;Acc:HGNC:18073]	3	Radial Glia
RBMX	3.09565e-59	0.588227	0.967	0.952	6.49776e-55	RNA binding motif protein X-linked [Source:HGNC Symbol;Acc:HGNC:9910]	3	Radial Glia
GNPDA1	5.13738e-53	-0.516266	0.168	0.579	1.07834e-48	glucosamine-6-phosphate deaminase 1 [Source:HGNC Symbol;Acc:HGNC:4417]	3	Radial Glia
CBR1	1.91678e-48	0.357841	0.309	0.02	4.02332e-44	carbonyl reductase 1 [Source:HGNC Symbol;Acc:HGNC:1548]	3	Radial Glia
PCDHB5	5.70335e-45	0.420831	0.341	0.046	1.19713e-40	protocadherin beta 5 [Source:HGNC Symbol;Acc:HGNC:8690]	3	Radial Glia
MTRNR2L12	1.50388e-42	-0.821954	0.746	0.922	3.15664e-38	MT-RNR2 like 12 [Source:HGNC Symbol;Acc:HGNC:37169]	3	Radial Glia
WLS	7.64327e-41	0.533631	0.978	0.966	1.60432e-36	Wnt ligand secretion mediator [Source:HGNC Symbol;Acc:HGNC:30238]	3	Radial Glia
ATP5J2	1.12475e-36	0.475996	0.945	0.911	2.36085e-32	NA	3	Radial Glia
NMT1	1.08763e-34	0.479877	0.763	0.652	2.28293e-30	N-myristoyltransferase 1 [Source:HGNC Symbol;Acc:HGNC:7857]	3	Radial Glia
PRMT2	5.55264e-34	0.514826	0.875	0.804	1.1655e-29	protein arginine methyltransferase 2 [Source:HGNC Symbol;Acc:HGNC:5186]	3	Radial Glia
MT-ATP8	1.1987e-33	0.499954	0.864	0.804	2.51606e-29	mitochondrially encoded ATP synthase membrane subunit 8 [Source:HGNC Symbol;Acc:HGNC:7415]	3	Radial Glia
POLE4	5.05746e-31	-0.385666	0.284	0.61	1.06156e-26	DNA polymerase epsilon 4, accessory subunit [Source:HGNC Symbol;Acc:HGNC:18755]	3	Radial Glia
PKIB	5.86542e-31	0.38039	0.327	0.075	1.23115e-26	cAMP-dependent protein kinase inhibitor beta [Source:HGNC Symbol;Acc:HGNC:9018]	3	Radial Glia
TMEM42	1.24762e-28	-0.289594	0.141	0.421	2.61876e-24	transmembrane protein 42 [Source:HGNC Symbol;Acc:HGNC:28444]	3	Radial Glia
NLRP1	7.50982e-28	0.517098	0.975	0.973	1.57631e-23	NLR family pyrin domain containing 1 [Source:HGNC Symbol;Acc:HGNC:14374]	3	Radial Glia
TLE4	1.49042e-27	0.502765	0.956	0.937	3.1284e-23	TLE family member 4, transcriptional corepressor [Source:HGNC Symbol;Acc:HGNC:11840]	3	Radial Glia
GSTT1	8.88373e-27	-0.454512	0.466	0.738	1.86469e-22	glutathione S-transferase theta 1 [Source:HGNC Symbol;Acc:HGNC:4641]	3	Radial Glia
AP2B1	8.4109e-26	0.358099	0.837	0.819	1.76545e-21	adaptor related protein complex 2 subunit beta 1 [Source:HGNC Symbol;Acc:HGNC:563]	3	Radial Glia
HNRNPM	9.58486e-25	0.447185	0.917	0.899	2.01186e-20	heterogeneous nuclear ribonucleoprotein M [Source:HGNC Symbol;Acc:HGNC:5046]	3	Radial Glia
LRRTM1	3.66512e-24	0.572363	0.634	0.472	7.6931e-20	leucine rich repeat transmembrane neuronal 1 [Source:HGNC Symbol;Acc:HGNC:19408]	3	Radial Glia
PSMC1	5.89625e-24	0.449343	0.853	0.802	1.23762e-19	proteasome 26S subunit, ATPase 1 [Source:HGNC Symbol;Acc:HGNC:9547]	3	Radial Glia
DPYSL2	2.38516e-23	0.446524	0.904	0.855	5.00645e-19	dihydropyrimidinase like 2 [Source:HGNC Symbol;Acc:HGNC:3014]	3	Radial Glia
MIF	4.21443e-23	-0.459072	0.688	0.859	8.84609e-19	macrophage migration inhibitory factor [Source:HGNC Symbol;Acc:HGNC:7097]	3	Radial Glia
EMC4	1.90489e-22	-0.359465	0.546	0.789	3.99837e-18	ER membrane protein complex subunit 4 [Source:HGNC Symbol;Acc:HGNC:28032]	3	Radial Glia
GPC3	3.727e-22	-0.697097	0.554	0.772	7.82297e-18	glypican 3 [Source:HGNC Symbol;Acc:HGNC:4451]	3	Radial Glia
PABPC4	1.2721e-21	0.348274	0.656	0.608	2.67014e-17	poly(A) binding protein cytoplasmic 4 [Source:HGNC Symbol;Acc:HGNC:8557]	3	Radial Glia
MT-ND3	1.71133e-21	-0.378816	0.98	0.969	3.59209e-17	mitochondrially encoded NADH:ubiquinone oxidoreductase core subunit 3 [Source:HGNC Symbol;Acc:HGNC:7458]	3	Radial Glia
SNORA76	2.29337e-21	0.375909	0.631	0.571	4.81379e-17	NA	3	Radial Glia
7SK.2	9.3341e-21	-0.451896	0.569	0.804	1.95923e-16	NA	3	Radial Glia
JUNB	1.18179e-20	-0.637959	0.448	0.695	2.48057e-16	JunB proto-oncogene, AP-1 transcription factor subunit [Source:HGNC Symbol;Acc:HGNC:6205]	3	Radial Glia
LPAR2	1.38954e-20	0.403194	0.453	0.296	2.91665e-16	lysophosphatidic acid receptor 2 [Source:HGNC Symbol;Acc:HGNC:3168]	3	Radial Glia
TTYH1	1.50458e-20	0.382533	0.977	0.957	3.15811e-16	tweety family member 1 [Source:HGNC Symbol;Acc:HGNC:13476]	3	Radial Glia
CETN3	2.72072e-20	0.371888	0.689	0.606	5.7108e-16	centrin 3 [Source:HGNC Symbol;Acc:HGNC:1868]	3	Radial Glia
NTM	3.70848e-20	0.682556	0.543	0.395	7.7841e-16	neurotrimin [Source:HGNC Symbol;Acc:HGNC:17941]	3	Radial Glia
RAB3B	2.36156e-19	0.402189	0.567	0.451	4.95691e-15	RAB3B, member RAS oncogene family [Source:HGNC Symbol;Acc:HGNC:9778]	3	Radial Glia
C2orf40	7.63756e-19	-0.39562	0.269	0.508	1.60312e-14	NA	3	Radial Glia
PSMD14	1.87825e-18	0.337777	0.824	0.792	3.94244e-14	proteasome 26S subunit, non-ATPase 14 [Source:HGNC Symbol;Acc:HGNC:16889]	3	Radial Glia
MPHOSPH6	6.08626e-18	0.368402	0.772	0.716	1.27751e-13	M-phase phosphoprotein 6 [Source:HGNC Symbol;Acc:HGNC:7214]	3	Radial Glia
FAM32A	2.27972e-17	0.372609	0.817	0.789	4.78514e-13	family with sequence similarity 32 member A [Source:HGNC Symbol;Acc:HGNC:24563]	3	Radial Glia
HSPA1A	3.48562e-17	0.466032	0.48	0.342	7.31632e-13	heat shock protein family A (Hsp70) member 1A [Source:HGNC Symbol;Acc:HGNC:5232]	3	Radial Glia
RBM8A	4.42361e-17	0.299553	0.888	0.889	9.28516e-13	RNA binding motif protein 8A [Source:HGNC Symbol;Acc:HGNC:9905]	3	Radial Glia
RPL36	1.14982e-16	-0.254192	0.987	0.988	2.41348e-12	ribosomal protein L36 [Source:HGNC Symbol;Acc:HGNC:13631]	3	Radial Glia
SLC44A2	2.07923e-16	0.337499	0.673	0.659	4.36429e-12	solute carrier family 44 member 2 [Source:HGNC Symbol;Acc:HGNC:17292]	3	Radial Glia
RPS19	2.95876e-16	-0.259881	0.996	0.993	6.21044e-12	ribosomal protein S19 [Source:HGNC Symbol;Acc:HGNC:10402]	3	Radial Glia
ZIC1	3.91092e-16	0.462623	0.729	0.642	8.20903e-12	Zic family member 1 [Source:HGNC Symbol;Acc:HGNC:12872]	3	Radial Glia
RBM25	7.72147e-16	0.292313	0.821	0.835	1.62074e-11	RNA binding motif protein 25 [Source:HGNC Symbol;Acc:HGNC:23244]	3	Radial Glia
ZNF711	1.72234e-15	0.326929	0.655	0.572	3.6152e-11	zinc finger protein 711 [Source:HGNC Symbol;Acc:HGNC:13128]	3	Radial Glia
RERE	2.46652e-15	0.355219	0.79	0.724	5.17723e-11	arginine-glutamic acid dipeptide repeats [Source:HGNC Symbol;Acc:HGNC:9965]	3	Radial Glia
TPT1	2.92455e-15	-0.266056	0.996	0.995	6.13863e-11	tumor protein, translationally-controlled 1 [Source:HGNC Symbol;Acc:HGNC:12022]	3	Radial Glia
PFN2	3.03186e-15	0.390664	0.898	0.871	6.36388e-11	profilin 2 [Source:HGNC Symbol;Acc:HGNC:8882]	3	Radial Glia
CBX3	3.22122e-15	0.346753	0.882	0.869	6.76135e-11	chromobox 3 [Source:HGNC Symbol;Acc:HGNC:1553]	3	Radial Glia
COL2A1	3.49915e-15	0.358604	0.364	0.191	7.34473e-11	collagen type II alpha 1 chain [Source:HGNC Symbol;Acc:HGNC:2200]	3	Radial Glia
RPL27A	4.72189e-15	-0.346146	0.964	0.973	9.91124e-11	ribosomal protein L27a [Source:HGNC Symbol;Acc:HGNC:10329]	3	Radial Glia
NPTX2	1.19644e-14	-0.3904	0.221	0.429	2.51133e-10	neuronal pentraxin 2 [Source:HGNC Symbol;Acc:HGNC:7953]	3	Radial Glia
HSPA5	2.17707e-14	0.359052	0.975	0.968	4.56967e-10	heat shock protein family A (Hsp70) member 5 [Source:HGNC Symbol;Acc:HGNC:5238]	3	Radial Glia
IAH1	2.30089e-14	0.352858	0.588	0.451	4.82958e-10	isoamyl acetate hydrolyzing esterase 1 (putative) [Source:HGNC Symbol;Acc:HGNC:27696]	3	Radial Glia
BZW1	2.56552e-14	0.323472	0.896	0.869	5.38502e-10	basic leucine zipper and W2 domains 1 [Source:HGNC Symbol;Acc:HGNC:18380]	3	Radial Glia
SLC5A12	8.37223e-14	0.283107	0.383	0.233	1.75733e-09	solute carrier family 5 member 12 [Source:HGNC Symbol;Acc:HGNC:28750]	3	Radial Glia
PREX1	1.02148e-13	0.283097	0.527	0.457	2.14408e-09	phosphatidylinositol-3,4,5-trisphosphate dependent Rac exchange factor 1 [Source:HGNC Symbol;Acc:HGNC:32594]	3	Radial Glia
STAU2	1.12671e-13	0.306994	0.491	0.388	2.36497e-09	staufen double-stranded RNA binding protein 2 [Source:HGNC Symbol;Acc:HGNC:11371]	3	Radial Glia
DDAH2	2.14582e-13	0.293476	0.958	0.954	4.50407e-09	dimethylarginine dimethylaminohydrolase 2 [Source:HGNC Symbol;Acc:HGNC:2716]	3	Radial Glia
RPS18	2.50482e-13	-0.258812	0.996	0.995	5.25761e-09	ribosomal protein S18 [Source:HGNC Symbol;Acc:HGNC:10401]	3	Radial Glia
LDHA	3.36448e-13	0.532451	0.576	0.443	7.06203e-09	lactate dehydrogenase A [Source:HGNC Symbol;Acc:HGNC:6535]	3	Radial Glia
GOLGA2	3.493e-13	0.302251	0.681	0.617	7.33181e-09	golgin A2 [Source:HGNC Symbol;Acc:HGNC:4425]	3	Radial Glia
EXTL2	4.43432e-13	0.273945	0.607	0.55	9.30763e-09	exostosin like glycosyltransferase 2 [Source:HGNC Symbol;Acc:HGNC:3516]	3	Radial Glia
BCCIP	5.46293e-13	0.254773	0.626	0.612	1.14667e-08	BRCA2 and CDKN1A interacting protein [Source:HGNC Symbol;Acc:HGNC:978]	3	Radial Glia
TM7SF3	6.7982e-13	0.304191	0.631	0.61	1.42694e-08	transmembrane 7 superfamily member 3 [Source:HGNC Symbol;Acc:HGNC:23049]	3	Radial Glia
MEST	9.10774e-13	0.348922	0.939	0.908	1.91171e-08	mesoderm specific transcript [Source:HGNC Symbol;Acc:HGNC:7028]	3	Radial Glia
UQCR11.1	9.33476e-13	-0.286892	0.935	0.956	1.95937e-08	NA	3	Radial Glia
TOMM7	9.76512e-13	-0.279579	0.925	0.961	2.0497e-08	translocase of outer mitochondrial membrane 7 [Source:HGNC Symbol;Acc:HGNC:21648]	3	Radial Glia
SOCS3	1.4108e-12	-0.380044	0.242	0.436	2.96126e-08	suppressor of cytokine signaling 3 [Source:HGNC Symbol;Acc:HGNC:19391]	3	Radial Glia
PABPC1	1.51959e-12	0.343161	0.933	0.911	3.18962e-08	poly(A) binding protein cytoplasmic 1 [Source:HGNC Symbol;Acc:HGNC:8554]	3	Radial Glia
RBP4	1.56324e-12	-0.527244	0.917	0.951	3.28124e-08	retinol binding protein 4 [Source:HGNC Symbol;Acc:HGNC:9922]	3	Radial Glia
GAP43	2.7876e-12	0.463899	0.898	0.833	5.85118e-08	growth associated protein 43 [Source:HGNC Symbol;Acc:HGNC:4140]	3	Radial Glia
EFEMP1	8.02988e-12	-0.456598	0.385	0.576	1.68547e-07	EGF containing fibulin extracellular matrix protein 1 [Source:HGNC Symbol;Acc:HGNC:3218]	3	Radial Glia
BEX5	1.93537e-11	0.323224	0.425	0.295	4.06235e-07	brain expressed X-linked 5 [Source:HGNC Symbol;Acc:HGNC:27990]	3	Radial Glia
IST1	2.47892e-11	0.265911	0.659	0.591	5.20324e-07	IST1 factor associated with ESCRT-III [Source:HGNC Symbol;Acc:HGNC:28977]	3	Radial Glia
APCDD1	2.53424e-11	0.421943	0.816	0.825	5.31937e-07	APC down-regulated 1 [Source:HGNC Symbol;Acc:HGNC:15718]	3	Radial Glia
AP1S2	2.9779e-11	0.300755	0.839	0.83	6.25061e-07	adaptor related protein complex 1 subunit sigma 2 [Source:HGNC Symbol;Acc:HGNC:560]	3	Radial Glia
TSPAN2	5.21435e-11	0.263861	0.588	0.535	1.09449e-06	tetraspanin 2 [Source:HGNC Symbol;Acc:HGNC:20659]	3	Radial Glia
PCSK1N	5.6334e-11	-0.334918	0.901	0.937	1.18245e-06	proprotein convertase subtilisin/kexin type 1 inhibitor [Source:HGNC Symbol;Acc:HGNC:17301]	3	Radial Glia
DNER	7.7279e-11	0.336666	0.742	0.627	1.62209e-06	delta/notch like EGF repeat containing [Source:HGNC Symbol;Acc:HGNC:24456]	3	Radial Glia
AKAP12	7.75048e-11	0.395212	0.559	0.526	1.62682e-06	A-kinase anchoring protein 12 [Source:HGNC Symbol;Acc:HGNC:370]	3	Radial Glia
CYBA	8.37672e-11	-0.280509	0.43	0.62	1.75827e-06	cytochrome b-245 alpha chain [Source:HGNC Symbol;Acc:HGNC:2577]	3	Radial Glia
LARP7	1.04896e-10	0.270397	0.743	0.709	2.20177e-06	La ribonucleoprotein domain family member 7 [Source:HGNC Symbol;Acc:HGNC:24912]	3	Radial Glia
PDAP1	1.23548e-10	0.253719	0.869	0.862	2.59326e-06	PDGFA associated protein 1 [Source:HGNC Symbol;Acc:HGNC:14634]	3	Radial Glia
FADS1	1.36013e-10	0.297027	0.628	0.557	2.85492e-06	fatty acid desaturase 1 [Source:HGNC Symbol;Acc:HGNC:3574]	3	Radial Glia
ENSA	1.54206e-10	0.264382	0.885	0.882	3.23678e-06	endosulfine alpha [Source:HGNC Symbol;Acc:HGNC:3360]	3	Radial Glia
PREPL	1.58506e-10	0.276832	0.573	0.525	3.32704e-06	prolyl endopeptidase like [Source:HGNC Symbol;Acc:HGNC:30228]	3	Radial Glia
TSTD1	1.6926e-10	0.278999	0.687	0.606	3.55278e-06	thiosulfate sulfurtransferase like domain containing 1 [Source:HGNC Symbol;Acc:HGNC:35410]	3	Radial Glia
POR	1.79381e-10	0.272706	0.868	0.847	3.76521e-06	cytochrome p450 oxidoreductase [Source:HGNC Symbol;Acc:HGNC:9208]	3	Radial Glia
KCNK12	1.8227e-10	0.329756	0.331	0.227	3.82584e-06	potassium two pore domain channel subfamily K member 12 [Source:HGNC Symbol;Acc:HGNC:6274]	3	Radial Glia
FDFT1	1.89579e-10	0.411345	0.72	0.661	3.97926e-06	farnesyl-diphosphate farnesyltransferase 1 [Source:HGNC Symbol;Acc:HGNC:3629]	3	Radial Glia
FDFT1	1.89579e-10	0.411345	0.72	0.661	3.97926e-06	farnesyl-diphosphate farnesyltransferase 1 [Source:NCBI gene;Acc:2222]	3	Radial Glia
FXR1	2.9147e-10	0.254488	0.903	0.896	6.11796e-06	FMR1 autosomal homolog 1 [Source:HGNC Symbol;Acc:HGNC:4023]	3	Radial Glia
WNT4	3.37655e-10	0.385682	0.412	0.334	7.08739e-06	Wnt family member 4 [Source:HGNC Symbol;Acc:HGNC:12783]	3	Radial Glia
HSP90B1	6.36178e-10	0.316143	0.97	0.959	1.33534e-05	heat shock protein 90 beta family member 1 [Source:HGNC Symbol;Acc:HGNC:12028]	3	Radial Glia
CCND1	7.46326e-10	0.364974	0.637	0.578	1.56654e-05	cyclin D1 [Source:HGNC Symbol;Acc:HGNC:1582]	3	Radial Glia
EFNB2	7.84843e-10	0.274842	0.933	0.91	1.64739e-05	ephrin B2 [Source:HGNC Symbol;Acc:HGNC:3227]	3	Radial Glia
FTL	1.52497e-09	-0.272031	0.988	0.988	3.20092e-05	ferritin light chain [Source:HGNC Symbol;Acc:HGNC:3999]	3	Radial Glia
APLP2	2.23145e-09	0.339172	0.94	0.947	4.68381e-05	amyloid beta precursor like protein 2 [Source:HGNC Symbol;Acc:HGNC:598]	3	Radial Glia
VIPR2	3.74809e-09	0.28929	0.597	0.54	7.86725e-05	vasoactive intestinal peptide receptor 2 [Source:HGNC Symbol;Acc:HGNC:12695]	3	Radial Glia
PTPLB	4.99551e-09	0.268717	0.331	0.262	0.000104856	NA	3	Radial Glia
BEX1	7.73277e-09	0.312836	0.958	0.939	0.000162311	brain expressed X-linked 1 [Source:HGNC Symbol;Acc:HGNC:1036]	3	Radial Glia
ATF3	8.52782e-09	0.318046	0.505	0.44	0.000178999	activating transcription factor 3 [Source:HGNC Symbol;Acc:HGNC:785]	3	Radial Glia
HTRA1	1.29186e-08	0.33707	0.804	0.811	0.000271161	HtrA serine peptidase 1 [Source:HGNC Symbol;Acc:HGNC:9476]	3	Radial Glia
JAG1	1.29956e-08	0.279989	0.543	0.46	0.000272778	jagged canonical Notch ligand 1 [Source:HGNC Symbol;Acc:HGNC:6188]	3	Radial Glia
HOXB9	2.26545e-08	0.324085	0.431	0.366	0.000475518	homeobox B9 [Source:HGNC Symbol;Acc:HGNC:5120]	3	Radial Glia
STMN1	2.50354e-08	0.260102	0.98	0.978	0.000525493	stathmin 1 [Source:HGNC Symbol;Acc:HGNC:6510]	3	Radial Glia
MT-ND5	3.18942e-08	-0.257185	0.952	0.971	0.00066946	mitochondrially encoded NADH:ubiquinone oxidoreductase core subunit 5 [Source:HGNC Symbol;Acc:HGNC:7461]	3	Radial Glia
NES	3.32077e-08	0.306679	0.901	0.876	0.000697029	nestin [Source:HGNC Symbol;Acc:HGNC:7756]	3	Radial Glia
MSMO1	4.43274e-08	0.32606	0.636	0.586	0.000930431	methylsterol monooxygenase 1 [Source:HGNC Symbol;Acc:HGNC:10545]	3	Radial Glia
IGFBP7-AS1	5.03986e-08	-0.36276	0.438	0.598	0.00105787	IGFBP7 antisense RNA 1 [Source:HGNC Symbol;Acc:HGNC:40296]	3	Radial Glia
PCSK1	5.49152e-08	0.310985	0.592	0.44	0.00115267	proprotein convertase subtilisin/kexin type 1 [Source:HGNC Symbol;Acc:HGNC:8743]	3	Radial Glia
MT-CO2	5.79701e-08	-0.262283	0.991	0.988	0.00121679	mitochondrially encoded cytochrome c oxidase II [Source:HGNC Symbol;Acc:HGNC:7421]	3	Radial Glia
OLIG3	7.43712e-08	0.313448	0.417	0.296	0.00156105	oligodendrocyte transcription factor 3 [Source:HGNC Symbol;Acc:HGNC:18003]	3	Radial Glia
HMGCS1	1.26979e-07	0.27564	0.556	0.532	0.00266528	3-hydroxy-3-methylglutaryl-CoA synthase 1 [Source:HGNC Symbol;Acc:HGNC:5007]	3	Radial Glia
2001-03-01	1.34362e-07	-0.302682	0.463	0.613	0.00282026	mitochondrial amidoxime reducing component 1 [Source:HGNC Symbol;Acc:HGNC:26189]	3	Radial Glia
MT-ATP6	2.38901e-07	-0.258188	0.993	0.985	0.00501453	mitochondrially encoded ATP synthase membrane subunit 6 [Source:HGNC Symbol;Acc:HGNC:7414]	3	Radial Glia
FDPS	2.44858e-07	0.290588	0.774	0.77	0.00513957	farnesyl diphosphate synthase [Source:HGNC Symbol;Acc:HGNC:3631]	3	Radial Glia
MSX1	3.5023e-07	0.288083	0.906	0.872	0.00735133	msh homeobox 1 [Source:HGNC Symbol;Acc:HGNC:7391]	3	Radial Glia
ID1	3.65372e-07	-0.362864	0.727	0.838	0.00766916	inhibitor of DNA binding 1, HLH protein [Source:HGNC Symbol;Acc:HGNC:5360]	3	Radial Glia
MAP1B	4.02265e-07	0.257782	0.951	0.928	0.00844355	microtubule associated protein 1B [Source:HGNC Symbol;Acc:HGNC:6836]	3	Radial Glia
TUBB2A	5.44813e-07	0.32483	0.9	0.882	0.0114356	tubulin beta 2A class IIa [Source:HGNC Symbol;Acc:HGNC:12412]	3	Radial Glia
SAT1	5.70958e-07	0.321113	0.794	0.799	0.0119844	spermidine/spermine N1-acetyltransferase 1 [Source:HGNC Symbol;Acc:HGNC:10540]	3	Radial Glia
CCDC80	6.11004e-07	0.310073	0.868	0.876	0.012825	coiled-coil domain containing 80 [Source:HGNC Symbol;Acc:HGNC:30649]	3	Radial Glia
BCYRN1	7.35653e-07	0.434893	0.62	0.571	0.0154414	brain cytoplasmic RNA 1 [Source:HGNC Symbol;Acc:HGNC:1022]	3	Radial Glia
CLU	1.71382e-06	-0.386317	0.923	0.945	0.0359731	clusterin [Source:HGNC Symbol;Acc:HGNC:2095]	3	Radial Glia
ID4	1.83593e-06	-0.278441	0.842	0.917	0.0385361	inhibitor of DNA binding 4, HLH protein [Source:HGNC Symbol;Acc:HGNC:5363]	3	Radial Glia
PEG3	1.22117e-11	0.719573	0.492	0	2.56323e-07	paternally expressed 3 [Source:HGNC Symbol;Acc:HGNC:8826]	18	Radial Glia
TAF9B	1.13198e-10	-0.394258	0	0.434	2.37603e-06	TATA-box binding protein associated factor 9b [Source:HGNC Symbol;Acc:HGNC:17306]	18	Radial Glia
ZIC4	3.60444e-08	0.649749	0.667	0.151	0.000756572	Zic family member 4 [Source:HGNC Symbol;Acc:HGNC:20393]	18	Radial Glia
LDHA	3.85034e-08	1.61985	0.841	0.472	0.000808185	lactate dehydrogenase A [Source:HGNC Symbol;Acc:HGNC:6535]	18	Radial Glia
CBR1	4.01605e-08	0.408526	0.476	0.038	0.000842969	carbonyl reductase 1 [Source:HGNC Symbol;Acc:HGNC:1548]	18	Radial Glia
NNAT	5.91762e-08	-0.985341	0.222	0.736	0.00124211	neuronatin [Source:HGNC Symbol;Acc:HGNC:7860]	18	Radial Glia
GNPDA1	2.60223e-07	-0.537451	0.143	0.623	0.00546208	glucosamine-6-phosphate deaminase 1 [Source:HGNC Symbol;Acc:HGNC:4417]	18	Radial Glia
SAT1	3.94739e-07	1.40529	0.968	0.811	0.00828558	spermidine/spermine N1-acetyltransferase 1 [Source:HGNC Symbol;Acc:HGNC:10540]	18	Radial Glia
ZIC1	1.00034e-06	0.963185	0.825	0.415	0.0209971	Zic family member 1 [Source:HGNC Symbol;Acc:HGNC:12872]	18	Radial Glia
OTX2	1.76613e-06	0.487424	0.413	0.038	0.0370711	orthodenticle homeobox 2 [Source:HGNC Symbol;Acc:HGNC:8522]	18	Radial Glia
PEG3	2.00175e-114	1.07298	0.565	0.002	4.20168e-110	paternally expressed 3 [Source:HGNC Symbol;Acc:HGNC:8826]	7	Radial Glia
NNAT	5.51824e-93	-1.15029	0.236	0.83	1.15828e-88	neuronatin [Source:HGNC Symbol;Acc:HGNC:7860]	7	Radial Glia
RBMX	1.08172e-58	0.720542	0.986	0.968	2.27054e-54	RNA binding motif protein X-linked [Source:HGNC Symbol;Acc:HGNC:9910]	7	Radial Glia
LDHA	6.19835e-47	1.265	0.864	0.634	1.30103e-42	lactate dehydrogenase A [Source:HGNC Symbol;Acc:HGNC:6535]	7	Radial Glia
GNPDA1	7.93067e-47	-0.428135	0.128	0.518	1.66465e-42	glucosamine-6-phosphate deaminase 1 [Source:HGNC Symbol;Acc:HGNC:4417]	7	Radial Glia
MTRNR2L12	8.03045e-45	-0.721355	0.646	0.927	1.68559e-40	MT-RNR2 like 12 [Source:HGNC Symbol;Acc:HGNC:37169]	7	Radial Glia
ARMCX1	3.34124e-43	-0.324651	0.06	0.383	7.01325e-39	armadillo repeat containing X-linked 1 [Source:HGNC Symbol;Acc:HGNC:18073]	7	Radial Glia
POLE4	1.11878e-36	-0.399835	0.24	0.613	2.34832e-32	DNA polymerase epsilon 4, accessory subunit [Source:HGNC Symbol;Acc:HGNC:18755]	7	Radial Glia
EMC4	1.19406e-35	-0.447592	0.477	0.824	2.50633e-31	ER membrane protein complex subunit 4 [Source:HGNC Symbol;Acc:HGNC:28032]	7	Radial Glia
PABPC1	1.29004e-30	0.512608	0.983	0.974	2.70779e-26	poly(A) binding protein cytoplasmic 1 [Source:HGNC Symbol;Acc:HGNC:8554]	7	Radial Glia
GSTT1	3.60526e-28	-0.348078	0.301	0.632	7.56744e-24	glutathione S-transferase theta 1 [Source:HGNC Symbol;Acc:HGNC:4641]	7	Radial Glia
CBR1	3.12678e-26	0.276755	0.214	0.017	6.56311e-22	carbonyl reductase 1 [Source:HGNC Symbol;Acc:HGNC:1548]	7	Radial Glia
SNAPC1	5.0501e-26	-0.287876	0.197	0.495	1.06002e-21	small nuclear RNA activating complex polypeptide 1 [Source:HGNC Symbol;Acc:HGNC:11134]	7	Radial Glia
ATP5J2	3.01804e-24	0.472038	0.933	0.888	6.33487e-20	NA	7	Radial Glia
RP4-665J23.1	5.22041e-24	0.385122	0.308	0.105	1.09576e-19	NA	7	Radial Glia
AP2B1	4.56586e-23	0.381908	0.835	0.845	9.58373e-19	adaptor related protein complex 2 subunit beta 1 [Source:HGNC Symbol;Acc:HGNC:563]	7	Radial Glia
PCDHB5	1.27014e-22	0.260946	0.203	0.028	2.66602e-18	protocadherin beta 5 [Source:HGNC Symbol;Acc:HGNC:8690]	7	Radial Glia
LY6E	5.06998e-22	-0.263107	0.206	0.477	1.06419e-17	lymphocyte antigen 6 family member E [Source:HGNC Symbol;Acc:HGNC:6727]	7	Radial Glia
NMT1	2.28186e-21	0.351909	0.726	0.677	4.78963e-17	N-myristoyltransferase 1 [Source:HGNC Symbol;Acc:HGNC:7857]	7	Radial Glia
PKIB	1.30474e-20	0.316846	0.244	0.054	2.73866e-16	cAMP-dependent protein kinase inhibitor beta [Source:HGNC Symbol;Acc:HGNC:9018]	7	Radial Glia
CBX3	2.33452e-19	0.427779	0.922	0.88	4.90016e-15	chromobox 3 [Source:HGNC Symbol;Acc:HGNC:1553]	7	Radial Glia
PRMT2	5.32999e-19	0.342352	0.74	0.742	1.11876e-14	protein arginine methyltransferase 2 [Source:HGNC Symbol;Acc:HGNC:5186]	7	Radial Glia
MTRNR2L8	1.13979e-18	-0.301043	0.274	0.533	2.39242e-14	MT-RNR2 like 8 [Source:HGNC Symbol;Acc:HGNC:37165]	7	Radial Glia
PSMD14	2.27609e-18	0.328518	0.76	0.768	4.7775e-14	proteasome 26S subunit, non-ATPase 14 [Source:HGNC Symbol;Acc:HGNC:16889]	7	Radial Glia
THOC1	3.62495e-18	0.391984	0.405	0.252	7.60877e-14	THO complex 1 [Source:HGNC Symbol;Acc:HGNC:19070]	7	Radial Glia
RPL27A	7.03705e-18	-0.369911	0.99	0.998	1.47708e-13	ribosomal protein L27a [Source:HGNC Symbol;Acc:HGNC:10329]	7	Radial Glia
TBCA	7.70156e-18	0.314535	0.963	0.974	1.61656e-13	tubulin folding cofactor A [Source:HGNC Symbol;Acc:HGNC:11579]	7	Radial Glia
ENO1	1.1026e-17	0.465895	0.993	0.985	2.31435e-13	enolase 1 [Source:HGNC Symbol;Acc:HGNC:3350]	7	Radial Glia
SNORA76	1.89034e-17	0.337443	0.584	0.531	3.96783e-13	NA	7	Radial Glia
PGK1	2.03295e-17	0.573623	0.963	0.946	4.26716e-13	phosphoglycerate kinase 1 [Source:HGNC Symbol;Acc:HGNC:8896]	7	Radial Glia
NARF	2.48411e-17	0.269965	0.753	0.798	5.21415e-13	nuclear prelamin A recognition factor [Source:HGNC Symbol;Acc:HGNC:29916]	7	Radial Glia
PABPC4	2.97122e-17	0.403949	0.722	0.652	6.23659e-13	poly(A) binding protein cytoplasmic 4 [Source:HGNC Symbol;Acc:HGNC:8557]	7	Radial Glia
PSMC1	4.9895e-17	0.256737	0.804	0.834	1.0473e-12	proteasome 26S subunit, ATPase 1 [Source:HGNC Symbol;Acc:HGNC:9547]	7	Radial Glia
METAP2	5.13994e-17	0.335032	0.908	0.912	1.07887e-12	methionyl aminopeptidase 2 [Source:HGNC Symbol;Acc:HGNC:16672]	7	Radial Glia
LY6H	5.71554e-17	-0.470212	0.464	0.716	1.19969e-12	lymphocyte antigen 6 family member H [Source:HGNC Symbol;Acc:HGNC:6728]	7	Radial Glia
TPI1	7.47912e-17	0.40909	0.994	0.994	1.56987e-12	triosephosphate isomerase 1 [Source:HGNC Symbol;Acc:HGNC:12009]	7	Radial Glia
MT-CYB	1.5523e-16	-0.618658	0.93	1	3.25827e-12	mitochondrially encoded cytochrome b [Source:HGNC Symbol;Acc:HGNC:7427]	7	Radial Glia
GOLGA2	2.51116e-16	0.402485	0.604	0.527	5.27093e-12	golgin A2 [Source:HGNC Symbol;Acc:HGNC:4425]	7	Radial Glia
MT-CO2	3.52541e-16	-0.703515	0.94	0.996	7.39983e-12	mitochondrially encoded cytochrome c oxidase II [Source:HGNC Symbol;Acc:HGNC:7421]	7	Radial Glia
DPYSL2	3.70628e-16	0.338375	0.882	0.895	7.77948e-12	dihydropyrimidinase like 2 [Source:HGNC Symbol;Acc:HGNC:3014]	7	Radial Glia
ENO2	4.95468e-16	0.465793	0.8	0.766	1.03999e-11	enolase 2 [Source:HGNC Symbol;Acc:HGNC:3353]	7	Radial Glia
RPL37A	6.79255e-16	-0.263102	0.999	1	1.42576e-11	ribosomal protein L37a [Source:HGNC Symbol;Acc:HGNC:10348]	7	Radial Glia
GAPDH	6.99898e-16	0.404649	1	1	1.46909e-11	glyceraldehyde-3-phosphate dehydrogenase [Source:HGNC Symbol;Acc:HGNC:4141]	7	Radial Glia
RBP4	7.52857e-16	-0.745798	0.719	0.871	1.58025e-11	retinol binding protein 4 [Source:HGNC Symbol;Acc:HGNC:9922]	7	Radial Glia
WDR74	1.1086e-15	0.476177	0.688	0.695	2.32695e-11	WD repeat domain 74 [Source:HGNC Symbol;Acc:HGNC:25529]	7	Radial Glia
GPC3	2.02282e-15	-0.494163	0.612	0.809	4.2459e-11	glypican 3 [Source:HGNC Symbol;Acc:HGNC:4451]	7	Radial Glia
WDR45B	2.44746e-15	0.314581	0.614	0.557	5.13722e-11	WD repeat domain 45B [Source:HGNC Symbol;Acc:HGNC:25072]	7	Radial Glia
RBM8A	1.06887e-14	0.31865	0.932	0.925	2.24355e-10	RNA binding motif protein 8A [Source:HGNC Symbol;Acc:HGNC:9905]	7	Radial Glia
RPL27	1.65227e-14	-0.254793	0.989	0.998	3.46811e-10	ribosomal protein L27 [Source:HGNC Symbol;Acc:HGNC:10328]	7	Radial Glia
DDIT4	3.24479e-14	0.506813	0.925	0.925	6.81081e-10	DNA damage inducible transcript 4 [Source:HGNC Symbol;Acc:HGNC:24944]	7	Radial Glia
TXNIP	3.4672e-14	0.422745	0.899	0.867	7.27766e-10	thioredoxin interacting protein [Source:HGNC Symbol;Acc:HGNC:16952]	7	Radial Glia
ATF4	3.77195e-14	0.361449	0.757	0.74	7.91732e-10	activating transcription factor 4 [Source:HGNC Symbol;Acc:HGNC:786]	7	Radial Glia
SARS	5.27205e-14	0.297608	0.736	0.774	1.1066e-09	seryl-tRNA synthetase [Source:HGNC Symbol;Acc:HGNC:10537]	7	Radial Glia
PGAM1	5.32875e-14	0.390119	0.953	0.948	1.1185e-09	phosphoglycerate mutase 1 [Source:HGNC Symbol;Acc:HGNC:8888]	7	Radial Glia
TSTD1	1.65888e-13	0.281468	0.503	0.426	3.48199e-09	thiosulfate sulfurtransferase like domain containing 1 [Source:HGNC Symbol;Acc:HGNC:35410]	7	Radial Glia
PKM	3.07988e-13	0.327224	0.98	0.974	6.46467e-09	pyruvate kinase M1/2 [Source:HGNC Symbol;Acc:HGNC:9021]	7	Radial Glia
PFN2	3.15595e-13	0.292439	0.801	0.834	6.62435e-09	profilin 2 [Source:HGNC Symbol;Acc:HGNC:8882]	7	Radial Glia
IGFBP2	3.20505e-13	0.616331	0.997	0.991	6.72739e-09	insulin like growth factor binding protein 2 [Source:HGNC Symbol;Acc:HGNC:5471]	7	Radial Glia
FAM162A	1.11667e-12	0.390972	0.908	0.912	2.34389e-08	family with sequence similarity 162 member A [Source:HGNC Symbol;Acc:HGNC:17865]	7	Radial Glia
NCBP2	1.35396e-12	0.251175	0.726	0.748	2.84196e-08	nuclear cap binding protein subunit 2 [Source:HGNC Symbol;Acc:HGNC:7659]	7	Radial Glia
SLC25A36	2.54274e-12	0.258454	0.76	0.778	5.33721e-08	solute carrier family 25 member 36 [Source:HGNC Symbol;Acc:HGNC:25554]	7	Radial Glia
ANKRA2	3.02133e-12	0.262905	0.376	0.292	6.34177e-08	ankyrin repeat family A member 2 [Source:HGNC Symbol;Acc:HGNC:13208]	7	Radial Glia
RPL26	3.09649e-12	-0.25068	0.999	1	6.49953e-08	ribosomal protein L26 [Source:HGNC Symbol;Acc:HGNC:10327]	7	Radial Glia
MT-CO3	3.25587e-12	-0.533131	0.947	0.994	6.83408e-08	mitochondrially encoded cytochrome c oxidase III [Source:HGNC Symbol;Acc:HGNC:7422]	7	Radial Glia
MIAT	3.5064e-12	0.359835	0.416	0.357	7.35994e-08	myocardial infarction associated transcript [Source:HGNC Symbol;Acc:HGNC:33425]	7	Radial Glia
BNIP3L	3.58533e-12	0.319477	0.945	0.94	7.52561e-08	BCL2 interacting protein 3 like [Source:HGNC Symbol;Acc:HGNC:1085]	7	Radial Glia
BCYRN1	3.59292e-12	0.749174	0.761	0.71	7.54153e-08	brain cytoplasmic RNA 1 [Source:HGNC Symbol;Acc:HGNC:1022]	7	Radial Glia
GPI	3.76204e-12	0.474432	0.783	0.742	7.89652e-08	glucose-6-phosphate isomerase [Source:HGNC Symbol;Acc:HGNC:4458]	7	Radial Glia
TNIP1	4.88513e-12	0.339007	0.568	0.445	1.02539e-07	TNFAIP3 interacting protein 1 [Source:HGNC Symbol;Acc:HGNC:16903]	7	Radial Glia
PEG10	4.98822e-12	0.546617	0.908	0.916	1.04703e-07	paternally expressed 10 [Source:HGNC Symbol;Acc:HGNC:14005]	7	Radial Glia
MPHOSPH6	8.3098e-12	0.26936	0.692	0.695	1.74423e-07	M-phase phosphoprotein 6 [Source:HGNC Symbol;Acc:HGNC:7214]	7	Radial Glia
DYNC1I2	9.64264e-12	0.286484	0.912	0.899	2.02399e-07	dynein cytoplasmic 1 intermediate chain 2 [Source:HGNC Symbol;Acc:HGNC:2964]	7	Radial Glia
SLITRK2	1.18025e-11	-0.385845	0.411	0.617	2.47735e-07	SLIT and NTRK like family member 2 [Source:HGNC Symbol;Acc:HGNC:13449]	7	Radial Glia
FXR1	1.47225e-11	0.276815	0.962	0.957	3.09026e-07	FMR1 autosomal homolog 1 [Source:HGNC Symbol;Acc:HGNC:4023]	7	Radial Glia
ALDOA	3.33746e-11	0.467637	0.979	0.976	7.00532e-07	aldolase, fructose-bisphosphate A [Source:HGNC Symbol;Acc:HGNC:414]	7	Radial Glia
SLC2A1	3.91495e-11	0.38003	0.692	0.682	8.21748e-07	solute carrier family 2 member 1 [Source:HGNC Symbol;Acc:HGNC:11005]	7	Radial Glia
DRAXIN	6.63231e-11	0.289097	0.666	0.647	1.39212e-06	dorsal inhibitory axon guidance protein [Source:HGNC Symbol;Acc:HGNC:25054]	7	Radial Glia
RPL31	9.78308e-11	-0.255576	0.989	0.994	2.05347e-06	ribosomal protein L31 [Source:HGNC Symbol;Acc:HGNC:10334]	7	Radial Glia
ARL4A	9.9558e-11	0.258652	0.706	0.759	2.08972e-06	ADP ribosylation factor like GTPase 4A [Source:HGNC Symbol;Acc:HGNC:695]	7	Radial Glia
HSPA1A	1.52321e-10	0.429126	0.388	0.267	3.19722e-06	heat shock protein family A (Hsp70) member 1A [Source:HGNC Symbol;Acc:HGNC:5232]	7	Radial Glia
BNIP3	1.63258e-10	0.428649	0.817	0.783	3.42678e-06	BCL2 interacting protein 3 [Source:HGNC Symbol;Acc:HGNC:1084]	7	Radial Glia
STC2	1.63759e-10	0.448819	0.46	0.318	3.4373e-06	stanniocalcin 2 [Source:HGNC Symbol;Acc:HGNC:11374]	7	Radial Glia
PCLO	1.9617e-10	0.371804	0.551	0.49	4.11761e-06	piccolo presynaptic cytomatrix protein [Source:HGNC Symbol;Acc:HGNC:13406]	7	Radial Glia
MT-CO1	3.2451e-10	-0.463489	0.972	0.996	6.81146e-06	mitochondrially encoded cytochrome c oxidase I [Source:HGNC Symbol;Acc:HGNC:7419]	7	Radial Glia
ILF3	4.50021e-10	0.255206	0.767	0.744	9.44593e-06	interleukin enhancer binding factor 3 [Source:HGNC Symbol;Acc:HGNC:6038]	7	Radial Glia
MT-ND5	4.73683e-10	-0.317829	0.925	0.978	9.94261e-06	mitochondrially encoded NADH:ubiquinone oxidoreductase core subunit 5 [Source:HGNC Symbol;Acc:HGNC:7461]	7	Radial Glia
HILPDA	4.76747e-10	0.524935	0.639	0.576	1.00069e-05	hypoxia inducible lipid droplet associated [Source:HGNC Symbol;Acc:HGNC:28859]	7	Radial Glia
MT-ND4	4.81491e-10	-0.339391	0.939	0.991	1.01065e-05	mitochondrially encoded NADH:ubiquinone oxidoreductase core subunit 4 [Source:HGNC Symbol;Acc:HGNC:7459]	7	Radial Glia
SPARCL1	6.56267e-10	-0.624327	0.435	0.628	1.3775e-05	SPARC like 1 [Source:HGNC Symbol;Acc:HGNC:11220]	7	Radial Glia
GNG11	6.59845e-10	-0.275047	0.518	0.708	1.38501e-05	G protein subunit gamma 11 [Source:HGNC Symbol;Acc:HGNC:4403]	7	Radial Glia
SLC16A3	9.61915e-10	0.370314	0.645	0.548	2.01906e-05	solute carrier family 16 member 3 [Source:HGNC Symbol;Acc:HGNC:10924]	7	Radial Glia
C1orf61	1.17333e-09	0.671578	0.233	0.114	2.46282e-05	chromosome 1 open reading frame 61 [Source:HGNC Symbol;Acc:HGNC:30780]	7	Radial Glia
INSIG2	1.80645e-09	0.259004	0.494	0.492	3.79174e-05	insulin induced gene 2 [Source:HGNC Symbol;Acc:HGNC:20452]	7	Radial Glia
VIM	1.82121e-09	0.360545	1	0.996	3.82273e-05	vimentin [Source:HGNC Symbol;Acc:HGNC:12692]	7	Radial Glia
RPS27L	2.76563e-09	0.285402	0.96	0.985	5.80506e-05	ribosomal protein S27 like [Source:HGNC Symbol;Acc:HGNC:18476]	7	Radial Glia
HES1	5.37547e-09	0.4346	0.827	0.824	0.000112831	hes family bHLH transcription factor 1 [Source:HGNC Symbol;Acc:HGNC:5192]	7	Radial Glia
RNMT	6.36813e-09	0.263144	0.822	0.828	0.000133667	RNA guanine-7 methyltransferase [Source:HGNC Symbol;Acc:HGNC:10075]	7	Radial Glia
NEAT1	6.65035e-09	0.460722	0.852	0.858	0.000139591	nuclear paraspeckle assembly transcript 1 [Source:HGNC Symbol;Acc:HGNC:30815]	7	Radial Glia
TLE4	1.19259e-08	0.342511	0.926	0.931	0.000250326	TLE family member 4, transcriptional corepressor [Source:HGNC Symbol;Acc:HGNC:11840]	7	Radial Glia
HES6	1.40237e-08	0.628954	0.575	0.566	0.000294357	hes family bHLH transcription factor 6 [Source:HGNC Symbol;Acc:HGNC:18254]	7	Radial Glia
STC1	1.45586e-08	0.422201	0.516	0.385	0.000305585	stanniocalcin 1 [Source:HGNC Symbol;Acc:HGNC:11373]	7	Radial Glia
MEST	1.48149e-08	0.321821	0.966	0.972	0.000310965	mesoderm specific transcript [Source:HGNC Symbol;Acc:HGNC:7028]	7	Radial Glia
MIF	1.94996e-08	-0.307102	0.874	0.935	0.000409297	macrophage migration inhibitory factor [Source:HGNC Symbol;Acc:HGNC:7097]	7	Radial Glia
SLC2A3	1.97992e-08	0.281103	0.476	0.441	0.000415585	solute carrier family 2 member 3 [Source:HGNC Symbol;Acc:HGNC:11007]	7	Radial Glia
P4HB	2.31346e-08	0.336345	0.903	0.92	0.000485595	prolyl 4-hydroxylase subunit beta [Source:HGNC Symbol;Acc:HGNC:8548]	7	Radial Glia
JUN	2.73505e-08	0.277037	0.837	0.849	0.000574086	Jun proto-oncogene, AP-1 transcription factor subunit [Source:HGNC Symbol;Acc:HGNC:6204]	7	Radial Glia
VIPR2	2.82901e-08	0.28663	0.396	0.288	0.00059381	vasoactive intestinal peptide receptor 2 [Source:HGNC Symbol;Acc:HGNC:12695]	7	Radial Glia
DUSP4	3.05135e-08	0.293274	0.277	0.213	0.000640479	dual specificity phosphatase 4 [Source:HGNC Symbol;Acc:HGNC:3070]	7	Radial Glia
MT-ND3	3.34259e-08	-0.628018	0.879	0.94	0.00070161	mitochondrially encoded NADH:ubiquinone oxidoreductase core subunit 3 [Source:HGNC Symbol;Acc:HGNC:7458]	7	Radial Glia
NTM	4.30477e-08	0.505459	0.433	0.366	0.000903571	neurotrimin [Source:HGNC Symbol;Acc:HGNC:17941]	7	Radial Glia
CDO1	1.70308e-07	-0.270028	0.695	0.826	0.00357477	cysteine dioxygenase type 1 [Source:HGNC Symbol;Acc:HGNC:1795]	7	Radial Glia
JUNB	1.91815e-07	-0.257872	0.25	0.404	0.0040262	JunB proto-oncogene, AP-1 transcription factor subunit [Source:HGNC Symbol;Acc:HGNC:6205]	7	Radial Glia
PLOD2	2.12257e-07	0.252462	0.361	0.267	0.00445528	procollagen-lysine,2-oxoglutarate 5-dioxygenase 2 [Source:HGNC Symbol;Acc:HGNC:9082]	7	Radial Glia
IGFBP5	2.61369e-07	-0.623713	0.624	0.742	0.00548613	insulin like growth factor binding protein 5 [Source:HGNC Symbol;Acc:HGNC:5474]	7	Radial Glia
RP11-344E13.3	2.66217e-07	0.268935	0.334	0.249	0.0055879	NA	7	Radial Glia
CTGF	3.60126e-07	0.314306	0.622	0.626	0.00755903	NA	7	Radial Glia
SYT1	3.83144e-07	0.30618	0.58	0.538	0.00804218	synaptotagmin 1 [Source:HGNC Symbol;Acc:HGNC:11509]	7	Radial Glia
OLIG3	5.49562e-07	0.321898	0.574	0.492	0.0115353	oligodendrocyte transcription factor 3 [Source:HGNC Symbol;Acc:HGNC:18003]	7	Radial Glia
P4HA1	6.69444e-07	0.286143	0.849	0.847	0.0140516	prolyl 4-hydroxylase subunit alpha 1 [Source:HGNC Symbol;Acc:HGNC:8546]	7	Radial Glia
PCSK1N	1.00764e-06	-0.269924	0.622	0.766	0.0211505	proprotein convertase subtilisin/kexin type 1 inhibitor [Source:HGNC Symbol;Acc:HGNC:17301]	7	Radial Glia
NNAT	1.13357e-144	-2.06882	0.245	0.949	2.37936e-140	neuronatin [Source:HGNC Symbol;Acc:HGNC:7860]	5	Radial Glia
RBMX	4.19089e-79	0.741911	0.993	0.985	8.79669e-75	RNA binding motif protein X-linked [Source:HGNC Symbol;Acc:HGNC:9910]	5	Radial Glia
TAF9B	1.92925e-61	-0.378616	0	0.279	4.0495e-57	TATA-box binding protein associated factor 9b [Source:HGNC Symbol;Acc:HGNC:17306]	5	Radial Glia
ARMCX1	8.1761e-46	-0.457012	0.053	0.379	1.71616e-41	armadillo repeat containing X-linked 1 [Source:HGNC Symbol;Acc:HGNC:18073]	5	Radial Glia
GNPDA1	7.11894e-45	-0.432756	0.091	0.447	1.49426e-40	glucosamine-6-phosphate deaminase 1 [Source:HGNC Symbol;Acc:HGNC:4417]	5	Radial Glia
MTRNR2L12	1.52186e-31	-0.618865	0.613	0.871	3.19438e-27	MT-RNR2 like 12 [Source:HGNC Symbol;Acc:HGNC:37169]	5	Radial Glia
PEG3	4.42162e-31	0.345295	0.188	0	9.28098e-27	paternally expressed 3 [Source:HGNC Symbol;Acc:HGNC:8826]	5	Radial Glia
PCDHB5	6.86114e-29	0.419237	0.29	0.044	1.44015e-24	protocadherin beta 5 [Source:HGNC Symbol;Acc:HGNC:8690]	5	Radial Glia
EMC4	3.72893e-28	-0.483118	0.533	0.823	7.82702e-24	ER membrane protein complex subunit 4 [Source:HGNC Symbol;Acc:HGNC:28032]	5	Radial Glia
PABPC1	2.79109e-27	0.548664	0.958	0.925	5.8585e-23	poly(A) binding protein cytoplasmic 1 [Source:HGNC Symbol;Acc:HGNC:8554]	5	Radial Glia
PABPC4	3.15847e-24	0.526082	0.719	0.648	6.62963e-20	poly(A) binding protein cytoplasmic 4 [Source:HGNC Symbol;Acc:HGNC:8557]	5	Radial Glia
SNAPC1	4.27814e-24	-0.347301	0.155	0.43	8.97981e-20	small nuclear RNA activating complex polypeptide 1 [Source:HGNC Symbol;Acc:HGNC:11134]	5	Radial Glia
RP4-665J23.1	5.80427e-23	0.519629	0.898	0.816	1.21832e-18	NA	5	Radial Glia
SNORA76	4.10001e-20	0.439705	0.518	0.362	8.60593e-16	NA	5	Radial Glia
THOC1	7.80873e-19	0.411884	0.459	0.294	1.63905e-14	THO complex 1 [Source:HGNC Symbol;Acc:HGNC:19070]	5	Radial Glia
MT-ND3	8.02758e-19	-0.603138	0.962	0.971	1.68499e-14	mitochondrially encoded NADH:ubiquinone oxidoreductase core subunit 3 [Source:HGNC Symbol;Acc:HGNC:7458]	5	Radial Glia
CETN3	1.39194e-18	0.395623	0.66	0.578	2.92167e-14	centrin 3 [Source:HGNC Symbol;Acc:HGNC:1868]	5	Radial Glia
7SK.2	1.88962e-18	-0.390245	0.594	0.837	3.96632e-14	NA	5	Radial Glia
NMT1	2.43038e-18	0.381631	0.648	0.57	5.10137e-14	N-myristoyltransferase 1 [Source:HGNC Symbol;Acc:HGNC:7857]	5	Radial Glia
ATP5J2	6.04848e-18	0.343912	0.904	0.879	1.26958e-13	NA	5	Radial Glia
PEG10	9.92568e-17	0.6411	0.945	0.881	2.0834e-12	paternally expressed 10 [Source:HGNC Symbol;Acc:HGNC:14005]	5	Radial Glia
BLCAP	1.81304e-16	0.498403	0.59	0.5	3.80558e-12	BLCAP apoptosis inducing factor [Source:HGNC Symbol;Acc:HGNC:1055]	5	Radial Glia
LPAR2	4.60052e-16	0.427439	0.606	0.459	9.65649e-12	lysophosphatidic acid receptor 2 [Source:HGNC Symbol;Acc:HGNC:3168]	5	Radial Glia
RERE	4.78591e-16	0.388161	0.864	0.845	1.00456e-11	arginine-glutamic acid dipeptide repeats [Source:HGNC Symbol;Acc:HGNC:9965]	5	Radial Glia
NHLH2	5.08972e-16	0.316358	0.173	0.027	1.06833e-11	nescient helix-loop-helix 2 [Source:HGNC Symbol;Acc:HGNC:7818]	5	Radial Glia
CBX3	1.35099e-15	0.361355	0.964	0.949	2.83572e-11	chromobox 3 [Source:HGNC Symbol;Acc:HGNC:1553]	5	Radial Glia
MPHOSPH6	3.84242e-15	0.307477	0.64	0.614	8.06523e-11	M-phase phosphoprotein 6 [Source:HGNC Symbol;Acc:HGNC:7214]	5	Radial Glia
C15orf41	7.64773e-15	0.383558	0.429	0.269	1.60526e-10	chromosome 15 open reading frame 41 [Source:HGNC Symbol;Acc:HGNC:26929]	5	Radial Glia
NTM	7.79475e-15	0.756536	0.568	0.58	1.63612e-10	neurotrimin [Source:HGNC Symbol;Acc:HGNC:17941]	5	Radial Glia
NPTX2	8.61331e-15	-0.409879	0.269	0.502	1.80793e-10	neuronal pentraxin 2 [Source:HGNC Symbol;Acc:HGNC:7953]	5	Radial Glia
PSMC1	1.09424e-14	0.302965	0.769	0.733	2.29682e-10	proteasome 26S subunit, ATPase 1 [Source:HGNC Symbol;Acc:HGNC:9547]	5	Radial Glia
PRMT2	2.25839e-14	0.332307	0.654	0.617	4.74035e-10	protein arginine methyltransferase 2 [Source:HGNC Symbol;Acc:HGNC:5186]	5	Radial Glia
FXR1	2.51273e-13	0.274905	0.929	0.942	5.27423e-09	FMR1 autosomal homolog 1 [Source:HGNC Symbol;Acc:HGNC:4023]	5	Radial Glia
LDHA	8.24024e-13	0.928167	0.496	0.388	1.72963e-08	lactate dehydrogenase A [Source:HGNC Symbol;Acc:HGNC:6535]	5	Radial Glia
CITED4	9.07556e-13	-0.405551	0.32	0.541	1.90496e-08	Cbp/p300 interacting transactivator with Glu/Asp rich carboxy-terminal domain 4 [Source:HGNC Symbol;Acc:HGNC:18696]	5	Radial Glia
METAP2	3.98735e-12	0.285101	0.902	0.886	8.36945e-08	methionyl aminopeptidase 2 [Source:HGNC Symbol;Acc:HGNC:16672]	5	Radial Glia
SLITRK2	6.73507e-12	-0.258388	0.094	0.252	1.41369e-07	SLIT and NTRK like family member 2 [Source:HGNC Symbol;Acc:HGNC:13449]	5	Radial Glia
MT-ATP8	6.98084e-12	0.328615	0.752	0.752	1.46528e-07	mitochondrially encoded ATP synthase membrane subunit 8 [Source:HGNC Symbol;Acc:HGNC:7415]	5	Radial Glia
PSMD14	1.03215e-11	0.306157	0.812	0.808	2.16648e-07	proteasome 26S subunit, non-ATPase 14 [Source:HGNC Symbol;Acc:HGNC:16889]	5	Radial Glia
ATF4	1.31762e-11	0.317201	0.753	0.731	2.76568e-07	activating transcription factor 4 [Source:HGNC Symbol;Acc:HGNC:786]	5	Radial Glia
CHMP3	2.18711e-11	0.291137	0.602	0.556	4.59075e-07	charged multivesicular body protein 3 [Source:HGNC Symbol;Acc:HGNC:29865]	5	Radial Glia
BCYRN1	2.90188e-11	0.965149	0.596	0.485	6.09105e-07	brain cytoplasmic RNA 1 [Source:HGNC Symbol;Acc:HGNC:1022]	5	Radial Glia
GOLGA2	5.77725e-11	0.260689	0.487	0.473	1.21265e-06	golgin A2 [Source:HGNC Symbol;Acc:HGNC:4425]	5	Radial Glia
FAM32A	9.37335e-11	0.262886	0.86	0.837	1.96747e-06	family with sequence similarity 32 member A [Source:HGNC Symbol;Acc:HGNC:24563]	5	Radial Glia
MT-CO2	1.36739e-10	-0.415278	0.979	0.988	2.87016e-06	mitochondrially encoded cytochrome c oxidase II [Source:HGNC Symbol;Acc:HGNC:7421]	5	Radial Glia
DYNC1I2	1.82663e-10	0.295076	0.967	0.966	3.83409e-06	dynein cytoplasmic 1 intermediate chain 2 [Source:HGNC Symbol;Acc:HGNC:2964]	5	Radial Glia
CNIH2	2.02498e-10	-0.331873	0.721	0.859	4.25044e-06	cornichon family AMPA receptor auxiliary protein 2 [Source:HGNC Symbol;Acc:HGNC:28744]	5	Radial Glia
HNRNPA1	2.63777e-10	0.259196	0.999	0.995	5.53667e-06	heterogeneous nuclear ribonucleoprotein A1 [Source:HGNC Symbol;Acc:HGNC:5031]	5	Radial Glia
SEZ6L2	1.85412e-09	0.344746	0.605	0.592	3.89179e-05	seizure related 6 homolog like 2 [Source:HGNC Symbol;Acc:HGNC:30844]	5	Radial Glia
H1F0	2.36562e-09	0.380913	0.6	0.51	4.96544e-05	H1 histone family member 0 [Source:HGNC Symbol;Acc:HGNC:4714]	5	Radial Glia
STAU2	2.97048e-09	0.28356	0.487	0.393	6.23503e-05	staufen double-stranded RNA binding protein 2 [Source:HGNC Symbol;Acc:HGNC:11371]	5	Radial Glia
MIF	3.00647e-09	-0.269866	0.533	0.716	6.31058e-05	macrophage migration inhibitory factor [Source:HGNC Symbol;Acc:HGNC:7097]	5	Radial Glia
OLIG3	3.72699e-09	0.319262	0.944	0.886	7.82294e-05	oligodendrocyte transcription factor 3 [Source:HGNC Symbol;Acc:HGNC:18003]	5	Radial Glia
HNRNPM	4.40722e-09	0.294269	0.91	0.934	9.25077e-05	heterogeneous nuclear ribonucleoprotein M [Source:HGNC Symbol;Acc:HGNC:5046]	5	Radial Glia
UBE2L6	4.71238e-09	0.253863	0.813	0.808	9.89128e-05	ubiquitin conjugating enzyme E2 L6 [Source:HGNC Symbol;Acc:HGNC:12490]	5	Radial Glia
AMD1	5.12022e-09	0.250456	0.498	0.483	0.000107474	adenosylmethionine decarboxylase 1 [Source:HGNC Symbol;Acc:HGNC:457]	5	Radial Glia
MT-ATP6	6.07895e-09	-0.433605	0.973	0.99	0.000127597	mitochondrially encoded ATP synthase membrane subunit 6 [Source:HGNC Symbol;Acc:HGNC:7414]	5	Radial Glia
BEX1	7.63333e-09	0.2934	0.964	0.947	0.000160224	brain expressed X-linked 1 [Source:HGNC Symbol;Acc:HGNC:1036]	5	Radial Glia
DNER	1.71554e-08	0.25126	0.618	0.646	0.000360092	delta/notch like EGF repeat containing [Source:HGNC Symbol;Acc:HGNC:24456]	5	Radial Glia
RGS16	2.15217e-08	0.448043	0.816	0.735	0.00045174	regulator of G protein signaling 16 [Source:HGNC Symbol;Acc:HGNC:9997]	5	Radial Glia
FAM57B	3.0976e-08	0.251438	0.458	0.41	0.000650186	NA	5	Radial Glia
FDPS	3.69667e-08	0.317352	0.795	0.738	0.000775932	farnesyl diphosphate synthase [Source:HGNC Symbol;Acc:HGNC:3631]	5	Radial Glia
LUC7L3	4.02114e-08	0.297611	0.832	0.813	0.000844037	LUC7 like 3 pre-mRNA splicing factor [Source:HGNC Symbol;Acc:HGNC:24309]	5	Radial Glia
TNPO1	1.03698e-07	-0.305844	0.713	0.837	0.00217663	transportin 1 [Source:HGNC Symbol;Acc:HGNC:6401]	5	Radial Glia
GPC3	1.37282e-07	-0.348764	0.174	0.311	0.00288155	glypican 3 [Source:HGNC Symbol;Acc:HGNC:4451]	5	Radial Glia
FDFT1	1.43348e-07	0.282344	0.84	0.813	0.00300888	farnesyl-diphosphate farnesyltransferase 1 [Source:HGNC Symbol;Acc:HGNC:3629]	5	Radial Glia
FDFT1	1.43348e-07	0.282344	0.84	0.813	0.00300888	farnesyl-diphosphate farnesyltransferase 1 [Source:NCBI gene;Acc:2222]	5	Radial Glia
HOXC12	3.85436e-07	-0.265365	0.512	0.67	0.00809029	homeobox C12 [Source:HGNC Symbol;Acc:HGNC:5124]	5	Radial Glia
SRRM4	7.63974e-07	0.279905	0.86	0.837	0.0160358	serine/arginine repetitive matrix 4 [Source:HGNC Symbol;Acc:HGNC:29389]	5	Radial Glia
BARHL2	9.69197e-07	0.309955	0.4	0.294	0.0203434	BarH like homeobox 2 [Source:HGNC Symbol;Acc:HGNC:954]	5	Radial Glia
DUSP4	1.52479e-06	0.346221	0.659	0.653	0.0320053	dual specificity phosphatase 4 [Source:HGNC Symbol;Acc:HGNC:3070]	5	Radial Glia
NNAT	5.46258e-113	-1.21511	0.259	0.927	1.1466e-108	neuronatin [Source:HGNC Symbol;Acc:HGNC:7860]	6	Neuronal Precursors
TAF9B	5.09626e-112	-0.380915	0	0.497	1.0697e-107	TATA-box binding protein associated factor 9b [Source:HGNC Symbol;Acc:HGNC:17306]	6	Neuronal Precursors
PEG3	3.42859e-98	0.852293	0.547	0	7.19661e-94	paternally expressed 3 [Source:HGNC Symbol;Acc:HGNC:8826]	6	Neuronal Precursors
GNPDA1	3.0918e-58	-0.467788	0.137	0.606	6.48968e-54	glucosamine-6-phosphate deaminase 1 [Source:HGNC Symbol;Acc:HGNC:4417]	6	Neuronal Precursors
MTRNR2L12	1.13298e-55	-0.705604	0.796	0.976	2.37812e-51	MT-RNR2 like 12 [Source:HGNC Symbol;Acc:HGNC:37169]	6	Neuronal Precursors
RBMX	2.9832e-54	0.639024	0.994	0.992	6.26174e-50	RNA binding motif protein X-linked [Source:HGNC Symbol;Acc:HGNC:9910]	6	Neuronal Precursors
PCDHB5	1.14324e-46	0.436604	0.405	0.043	2.39966e-42	protocadherin beta 5 [Source:HGNC Symbol;Acc:HGNC:8690]	6	Neuronal Precursors
ARMCX1	1.47427e-42	-0.260794	0.055	0.383	3.0945e-38	armadillo repeat containing X-linked 1 [Source:HGNC Symbol;Acc:HGNC:18073]	6	Neuronal Precursors
ATP5J2	1.4489e-40	0.488038	0.98	0.978	3.04125e-36	NA	6	Neuronal Precursors
MT-ND3	1.19381e-38	-0.553187	0.995	0.997	2.50581e-34	mitochondrially encoded NADH:ubiquinone oxidoreductase core subunit 3 [Source:HGNC Symbol;Acc:HGNC:7458]	6	Neuronal Precursors
PKIB	2.0341e-36	0.402621	0.342	0.035	4.26958e-32	cAMP-dependent protein kinase inhibitor beta [Source:HGNC Symbol;Acc:HGNC:9018]	6	Neuronal Precursors
NPTX2	7.20164e-36	-0.494257	0.139	0.495	1.51162e-31	neuronal pentraxin 2 [Source:HGNC Symbol;Acc:HGNC:7953]	6	Neuronal Precursors
CBR1	2.42476e-35	0.327435	0.304	0.024	5.08958e-31	carbonyl reductase 1 [Source:HGNC Symbol;Acc:HGNC:1548]	6	Neuronal Precursors
LDHA	8.20864e-33	0.994069	0.772	0.715	1.72299e-28	lactate dehydrogenase A [Source:HGNC Symbol;Acc:HGNC:6535]	6	Neuronal Precursors
EMC4	1.17169e-31	-0.450884	0.61	0.88	2.45938e-27	ER membrane protein complex subunit 4 [Source:HGNC Symbol;Acc:HGNC:28032]	6	Neuronal Precursors
POLE4	4.28293e-29	-0.386927	0.446	0.777	8.98988e-25	DNA polymerase epsilon 4, accessory subunit [Source:HGNC Symbol;Acc:HGNC:18755]	6	Neuronal Precursors
PABPC4	5.33574e-28	0.458743	0.845	0.81	1.11997e-23	poly(A) binding protein cytoplasmic 4 [Source:HGNC Symbol;Acc:HGNC:8557]	6	Neuronal Precursors
GSTT1	1.04557e-27	-0.333638	0.371	0.715	2.19466e-23	glutathione S-transferase theta 1 [Source:HGNC Symbol;Acc:HGNC:4641]	6	Neuronal Precursors
MPHOSPH6	1.36969e-24	0.403931	0.885	0.872	2.87498e-20	M-phase phosphoprotein 6 [Source:HGNC Symbol;Acc:HGNC:7214]	6	Neuronal Precursors
SNAPC1	3.77335e-24	-0.298869	0.235	0.546	7.92025e-20	small nuclear RNA activating complex polypeptide 1 [Source:HGNC Symbol;Acc:HGNC:11134]	6	Neuronal Precursors
THUMPD3	7.55791e-24	-0.275211	0.383	0.704	1.5864e-19	THUMP domain containing 3 [Source:HGNC Symbol;Acc:HGNC:24493]	6	Neuronal Precursors
THOC1	8.55087e-24	0.426097	0.631	0.478	1.79483e-19	THO complex 1 [Source:HGNC Symbol;Acc:HGNC:19070]	6	Neuronal Precursors
MT-CO2	8.79593e-24	-0.392066	0.998	0.997	1.84627e-19	mitochondrially encoded cytochrome c oxidase II [Source:HGNC Symbol;Acc:HGNC:7421]	6	Neuronal Precursors
SNORA76	1.48451e-23	0.428693	0.683	0.587	3.11599e-19	NA	6	Neuronal Precursors
MT-ATP8	3.39307e-23	0.404492	0.911	0.935	7.12206e-19	mitochondrially encoded ATP synthase membrane subunit 8 [Source:HGNC Symbol;Acc:HGNC:7415]	6	Neuronal Precursors
PAX6	5.94532e-23	-0.281621	0.05	0.255	1.24792e-18	paired box 6 [Source:HGNC Symbol;Acc:HGNC:8620]	6	Neuronal Precursors
PSMC1	1.35912e-22	0.34284	0.889	0.905	2.85279e-18	proteasome 26S subunit, ATPase 1 [Source:HGNC Symbol;Acc:HGNC:9547]	6	Neuronal Precursors
CETN3	1.85309e-21	0.319287	0.74	0.731	3.88965e-17	centrin 3 [Source:HGNC Symbol;Acc:HGNC:1868]	6	Neuronal Precursors
NTM	3.35894e-21	0.967957	0.547	0.326	7.05042e-17	neurotrimin [Source:HGNC Symbol;Acc:HGNC:17941]	6	Neuronal Precursors
CBX3	1.20985e-20	0.370227	0.982	0.97	2.53947e-16	chromobox 3 [Source:HGNC Symbol;Acc:HGNC:1553]	6	Neuronal Precursors
RPL39L	1.92037e-20	0.280988	0.309	0.084	4.03086e-16	ribosomal protein L39 like [Source:HGNC Symbol;Acc:HGNC:17094]	6	Neuronal Precursors
PSMD14	5.77693e-20	0.298036	0.924	0.959	1.21258e-15	proteasome 26S subunit, non-ATPase 14 [Source:HGNC Symbol;Acc:HGNC:16889]	6	Neuronal Precursors
PEG10	6.81244e-20	0.59898	0.982	0.989	1.42993e-15	paternally expressed 10 [Source:HGNC Symbol;Acc:HGNC:14005]	6	Neuronal Precursors
PABPC1	1.0282e-19	0.425432	0.972	0.978	2.1582e-15	poly(A) binding protein cytoplasmic 1 [Source:HGNC Symbol;Acc:HGNC:8554]	6	Neuronal Precursors
KRTCAP2	2.35009e-19	-0.261268	0.383	0.671	4.93283e-15	keratinocyte associated protein 2 [Source:HGNC Symbol;Acc:HGNC:28942]	6	Neuronal Precursors
MEST	1.10526e-18	0.387255	0.964	0.981	2.31994e-14	mesoderm specific transcript [Source:HGNC Symbol;Acc:HGNC:7028]	6	Neuronal Precursors
RP4-665J23.1	1.98284e-18	0.357443	0.381	0.144	4.16199e-14	NA	6	Neuronal Precursors
MT-ATP6	2.5486e-18	-0.402591	0.996	1	5.3495e-14	mitochondrially encoded ATP synthase membrane subunit 6 [Source:HGNC Symbol;Acc:HGNC:7414]	6	Neuronal Precursors
GPC3	3.44534e-18	-0.439769	0.65	0.864	7.23177e-14	glypican 3 [Source:HGNC Symbol;Acc:HGNC:4451]	6	Neuronal Precursors
HNRNPM	2.66059e-15	0.359564	0.985	0.984	5.58458e-11	heterogeneous nuclear ribonucleoprotein M [Source:HGNC Symbol;Acc:HGNC:5046]	6	Neuronal Precursors
METAP2	9.77997e-15	0.288657	0.951	0.959	2.05282e-10	methionyl aminopeptidase 2 [Source:HGNC Symbol;Acc:HGNC:16672]	6	Neuronal Precursors
NMT1	9.80508e-15	0.280957	0.808	0.783	2.05809e-10	N-myristoyltransferase 1 [Source:HGNC Symbol;Acc:HGNC:7857]	6	Neuronal Precursors
PRMT2	1.52184e-14	0.32805	0.851	0.818	3.19435e-10	protein arginine methyltransferase 2 [Source:HGNC Symbol;Acc:HGNC:5186]	6	Neuronal Precursors
SLITRK2	2.68249e-14	-0.370527	0.331	0.573	5.63055e-10	SLIT and NTRK like family member 2 [Source:HGNC Symbol;Acc:HGNC:13449]	6	Neuronal Precursors
ZNF711	3.3209e-14	0.25951	0.707	0.707	6.97057e-10	zinc finger protein 711 [Source:HGNC Symbol;Acc:HGNC:13128]	6	Neuronal Precursors
PTGR1	1.39898e-13	0.275148	0.812	0.793	2.93646e-09	prostaglandin reductase 1 [Source:HGNC Symbol;Acc:HGNC:18429]	6	Neuronal Precursors
TBCA	1.672e-12	0.273169	0.978	0.984	3.50954e-08	tubulin folding cofactor A [Source:HGNC Symbol;Acc:HGNC:11579]	6	Neuronal Precursors
LPAR2	1.84322e-12	0.264464	0.472	0.337	3.86893e-08	lysophosphatidic acid receptor 2 [Source:HGNC Symbol;Acc:HGNC:3168]	6	Neuronal Precursors
MIF	1.86309e-12	-0.261538	0.786	0.929	3.91064e-08	macrophage migration inhibitory factor [Source:HGNC Symbol;Acc:HGNC:7097]	6	Neuronal Precursors
CKS1B	2.20599e-12	-0.423143	0.711	0.88	4.63038e-08	CDC28 protein kinase regulatory subunit 1B [Source:HGNC Symbol;Acc:HGNC:19083]	6	Neuronal Precursors
HSPA1A	2.41249e-12	0.315338	0.414	0.242	5.06382e-08	heat shock protein family A (Hsp70) member 1A [Source:HGNC Symbol;Acc:HGNC:5232]	6	Neuronal Precursors
IGDCC3	3.58714e-12	0.334299	0.642	0.587	7.52941e-08	immunoglobulin superfamily DCC subclass member 3 [Source:HGNC Symbol;Acc:HGNC:9700]	6	Neuronal Precursors
GAPDH	4.59812e-12	0.255612	1	1	9.65145e-08	glyceraldehyde-3-phosphate dehydrogenase [Source:HGNC Symbol;Acc:HGNC:4141]	6	Neuronal Precursors
IAH1	8.15534e-12	0.283785	0.605	0.492	1.71181e-07	isoamyl acetate hydrolyzing esterase 1 (putative) [Source:HGNC Symbol;Acc:HGNC:27696]	6	Neuronal Precursors
TCEAL8	1.94109e-11	0.277136	0.837	0.807	4.07434e-07	transcription elongation factor A like 8 [Source:HGNC Symbol;Acc:HGNC:28683]	6	Neuronal Precursors
WDR74	2.1194e-11	0.309351	0.573	0.693	4.44863e-07	WD repeat domain 74 [Source:HGNC Symbol;Acc:HGNC:25529]	6	Neuronal Precursors
CENPW	3.03029e-11	-0.313061	0.647	0.829	6.36057e-07	centromere protein W [Source:HGNC Symbol;Acc:HGNC:21488]	6	Neuronal Precursors
CITED2	5.23857e-11	0.258156	0.869	0.875	1.09958e-06	Cbp/p300 interacting transactivator with Glu/Asp rich carboxy-terminal domain 2 [Source:HGNC Symbol;Acc:HGNC:1987]	6	Neuronal Precursors
CDKN3	6.88463e-11	-0.302185	0.494	0.704	1.44508e-06	cyclin dependent kinase inhibitor 3 [Source:HGNC Symbol;Acc:HGNC:1791]	6	Neuronal Precursors
DDX39A	7.52122e-11	-0.261753	0.664	0.842	1.5787e-06	DExD-box helicase 39A [Source:HGNC Symbol;Acc:HGNC:17821]	6	Neuronal Precursors
PGK1	1.17764e-10	0.349637	0.927	0.951	2.47187e-06	phosphoglycerate kinase 1 [Source:HGNC Symbol;Acc:HGNC:8896]	6	Neuronal Precursors
H1F0	1.31232e-10	0.307647	0.416	0.307	2.75456e-06	H1 histone family member 0 [Source:HGNC Symbol;Acc:HGNC:4714]	6	Neuronal Precursors
CALM2	1.42343e-10	-0.265014	0.998	0.992	2.98777e-06	calmodulin 2 [Source:HGNC Symbol;Acc:HGNC:1445]	6	Neuronal Precursors
POU3F2	1.50006e-10	0.291835	0.642	0.647	3.14863e-06	POU class 3 homeobox 2 [Source:HGNC Symbol;Acc:HGNC:9215]	6	Neuronal Precursors
ARL4C	1.82744e-10	-0.26402	0.884	0.97	3.83579e-06	ADP ribosylation factor like GTPase 4C [Source:HGNC Symbol;Acc:HGNC:698]	6	Neuronal Precursors
IER2	1.8395e-10	0.254721	0.766	0.804	3.86112e-06	immediate early response 2 [Source:HGNC Symbol;Acc:HGNC:28871]	6	Neuronal Precursors
CCDC34	2.08675e-10	-0.276269	0.723	0.88	4.38009e-06	coiled-coil domain containing 34 [Source:HGNC Symbol;Acc:HGNC:25079]	6	Neuronal Precursors
PRC1	3.16043e-10	-0.342752	0.581	0.774	6.63375e-06	protein regulator of cytokinesis 1 [Source:HGNC Symbol;Acc:HGNC:9341]	6	Neuronal Precursors
HES6	4.12709e-10	0.608612	0.895	0.899	8.66277e-06	hes family bHLH transcription factor 6 [Source:HGNC Symbol;Acc:HGNC:18254]	6	Neuronal Precursors
LINC01158	6.62324e-10	0.291572	0.626	0.674	1.39022e-05	NA	6	Neuronal Precursors
NEK2	1.20431e-09	-0.279635	0.362	0.56	2.52784e-05	NIMA related kinase 2 [Source:HGNC Symbol;Acc:HGNC:7745]	6	Neuronal Precursors
DDIT4	1.39135e-09	0.425314	0.617	0.609	2.92045e-05	DNA damage inducible transcript 4 [Source:HGNC Symbol;Acc:HGNC:24944]	6	Neuronal Precursors
TPI1	1.80269e-09	0.306123	0.995	0.997	3.78386e-05	triosephosphate isomerase 1 [Source:HGNC Symbol;Acc:HGNC:12009]	6	Neuronal Precursors
CTGF	1.82147e-09	0.323312	0.738	0.78	3.82327e-05	NA	6	Neuronal Precursors
TLE4	2.01394e-09	0.292852	0.937	0.94	4.22726e-05	TLE family member 4, transcriptional corepressor [Source:HGNC Symbol;Acc:HGNC:11840]	6	Neuronal Precursors
NDC80	4.82204e-09	-0.250915	0.451	0.641	0.000101215	NDC80 kinetochore complex component [Source:HGNC Symbol;Acc:HGNC:16909]	6	Neuronal Precursors
NUF2	7.75067e-09	-0.269811	0.414	0.603	0.000162687	NUF2 component of NDC80 kinetochore complex [Source:HGNC Symbol;Acc:HGNC:14621]	6	Neuronal Precursors
CYR61	1.15077e-08	0.263226	0.69	0.72	0.000241546	NA	6	Neuronal Precursors
CKS2	1.35283e-08	-0.424688	0.743	0.87	0.00028396	CDC28 protein kinase regulatory subunit 2 [Source:HGNC Symbol;Acc:HGNC:2000]	6	Neuronal Precursors
BNIP3	1.43448e-08	0.390929	0.41	0.389	0.000301097	BCL2 interacting protein 3 [Source:HGNC Symbol;Acc:HGNC:1084]	6	Neuronal Precursors
PGAM1	1.88105e-08	0.270581	0.954	0.962	0.000394832	phosphoglycerate mutase 1 [Source:HGNC Symbol;Acc:HGNC:8888]	6	Neuronal Precursors
ENO1	2.08583e-08	0.337622	0.985	0.995	0.000437816	enolase 1 [Source:HGNC Symbol;Acc:HGNC:3350]	6	Neuronal Precursors
LY6H	2.36251e-08	-0.293444	0.537	0.717	0.00049589	lymphocyte antigen 6 family member H [Source:HGNC Symbol;Acc:HGNC:6728]	6	Neuronal Precursors
CCNB2	3.62794e-08	-0.370068	0.462	0.644	0.000761505	cyclin B2 [Source:HGNC Symbol;Acc:HGNC:1580]	6	Neuronal Precursors
DLL3	3.86127e-08	0.601171	0.431	0.296	0.00081048	delta like canonical Notch ligand 3 [Source:HGNC Symbol;Acc:HGNC:2909]	6	Neuronal Precursors
EIF4EBP1	4.71635e-08	0.2706	0.718	0.704	0.000989962	eukaryotic translation initiation factor 4E binding protein 1 [Source:HGNC Symbol;Acc:HGNC:3288]	6	Neuronal Precursors
NLRP1	5.62161e-08	0.33554	0.962	0.973	0.00117998	NLR family pyrin domain containing 1 [Source:HGNC Symbol;Acc:HGNC:14374]	6	Neuronal Precursors
NUCKS1	8.46889e-08	-0.264529	0.988	0.995	0.00177762	nuclear casein kinase and cyclin dependent kinase substrate 1 [Source:HGNC Symbol;Acc:HGNC:29923]	6	Neuronal Precursors
UBE2C	1.03245e-07	-0.388835	0.494	0.668	0.0021671	ubiquitin conjugating enzyme E2 C [Source:HGNC Symbol;Acc:HGNC:15937]	6	Neuronal Precursors
TTK	1.03625e-07	-0.257582	0.399	0.576	0.00217509	TTK protein kinase [Source:HGNC Symbol;Acc:HGNC:12401]	6	Neuronal Precursors
SAT1	1.10382e-07	0.274769	0.743	0.745	0.00231692	spermidine/spermine N1-acetyltransferase 1 [Source:HGNC Symbol;Acc:HGNC:10540]	6	Neuronal Precursors
TPX2	1.42743e-07	-0.297118	0.469	0.644	0.00299617	TPX2 microtubule nucleation factor [Source:HGNC Symbol;Acc:HGNC:1249]	6	Neuronal Precursors
NUSAP1	2.55882e-07	-0.289334	0.701	0.842	0.00537096	nucleolar and spindle associated protein 1 [Source:HGNC Symbol;Acc:HGNC:18538]	6	Neuronal Precursors
IGFBPL1	3.24316e-07	0.302237	0.383	0.332	0.0068074	insulin like growth factor binding protein like 1 [Source:HGNC Symbol;Acc:HGNC:20081]	6	Neuronal Precursors
MKI67	3.5591e-07	-0.267176	0.438	0.606	0.00747056	marker of proliferation Ki-67 [Source:HGNC Symbol;Acc:HGNC:7107]	6	Neuronal Precursors
UBE2S	3.56238e-07	-0.389527	0.813	0.905	0.00747744	ubiquitin conjugating enzyme E2 S [Source:HGNC Symbol;Acc:HGNC:17895]	6	Neuronal Precursors
CCNB1	4.31041e-07	-0.362627	0.52	0.685	0.00904755	cyclin B1 [Source:HGNC Symbol;Acc:HGNC:1579]	6	Neuronal Precursors
TXNIP	4.31845e-07	0.277751	0.638	0.633	0.00906442	thioredoxin interacting protein [Source:HGNC Symbol;Acc:HGNC:16952]	6	Neuronal Precursors
FABP7	4.98241e-07	-0.371288	0.248	0.372	0.0104581	fatty acid binding protein 7 [Source:HGNC Symbol;Acc:HGNC:3562]	6	Neuronal Precursors
CCND2	5.30889e-07	0.501123	0.565	0.557	0.0111434	cyclin D2 [Source:HGNC Symbol;Acc:HGNC:1583]	6	Neuronal Precursors
HP1BP3	7.36638e-07	-0.250036	0.871	0.946	0.015462	heterochromatin protein 1 binding protein 3 [Source:HGNC Symbol;Acc:HGNC:24973]	6	Neuronal Precursors
H2AFX	1.0701e-06	-0.25912	0.808	0.913	0.0224613	H2A histone family member X [Source:HGNC Symbol;Acc:HGNC:4739]	6	Neuronal Precursors
RND3	1.50887e-06	0.255757	0.798	0.818	0.0316711	Rho family GTPase 3 [Source:HGNC Symbol;Acc:HGNC:671]	6	Neuronal Precursors
CNTNAP2	1.79774e-06	0.300314	0.575	0.552	0.0377345	contactin associated protein like 2 [Source:HGNC Symbol;Acc:HGNC:13830]	6	Neuronal Precursors
RND2	2.24482e-06	0.261527	0.858	0.886	0.0471187	Rho family GTPase 2 [Source:HGNC Symbol;Acc:HGNC:18315]	6	Neuronal Precursors
NNAT	4.276e-47	-1.72138	0.195	0.614	8.97533e-43	neuronatin [Source:HGNC Symbol;Acc:HGNC:7860]	8	Neuronal Precursors
PEG3	3.44447e-40	1.25122	0.248	0	7.22994e-36	paternally expressed 3 [Source:HGNC Symbol;Acc:HGNC:8826]	8	Neuronal Precursors
TAF9B	6.31498e-27	-0.536253	0	0.134	1.32551e-22	TATA-box binding protein associated factor 9b [Source:HGNC Symbol;Acc:HGNC:17306]	8	Neuronal Precursors
MTRNR2L12	1.85868e-19	-1.11968	0.378	0.592	3.90137e-15	MT-RNR2 like 12 [Source:HGNC Symbol;Acc:HGNC:37169]	8	Neuronal Precursors
ARMCX1	3.58282e-16	-0.606224	0.025	0.164	7.52033e-12	armadillo repeat containing X-linked 1 [Source:HGNC Symbol;Acc:HGNC:18073]	8	Neuronal Precursors
PCDHB5	2.3476e-13	0.458494	0.13	0.012	4.92761e-09	protocadherin beta 5 [Source:HGNC Symbol;Acc:HGNC:8690]	8	Neuronal Precursors
RBMX	4.73938e-13	0.578179	0.673	0.565	9.94796e-09	RNA binding motif protein X-linked [Source:HGNC Symbol;Acc:HGNC:9910]	8	Neuronal Precursors
LDHA	3.49044e-12	1.01678	0.357	0.199	7.32643e-08	lactate dehydrogenase A [Source:HGNC Symbol;Acc:HGNC:6535]	8	Neuronal Precursors
GNPDA1	5.3152e-11	-0.401807	0.049	0.177	1.11566e-06	glucosamine-6-phosphate deaminase 1 [Source:HGNC Symbol;Acc:HGNC:4417]	8	Neuronal Precursors
NHLH2	2.007e-09	0.527718	0.136	0.035	4.21269e-05	nescient helix-loop-helix 2 [Source:HGNC Symbol;Acc:HGNC:7818]	8	Neuronal Precursors
FAM211A	5.09912e-09	-0.528495	0.225	0.4	0.000107031	NA	8	Neuronal Precursors
MT-ND2	5.75343e-08	0.756017	0.645	0.59	0.00120765	mitochondrially encoded NADH:ubiquinone oxidoreductase core subunit 2 [Source:HGNC Symbol;Acc:HGNC:7456]	8	Neuronal Precursors
HES6	7.20486e-08	0.847639	0.533	0.423	0.0015123	hes family bHLH transcription factor 6 [Source:HGNC Symbol;Acc:HGNC:18254]	8	Neuronal Precursors
HIST1H3D	2.03605e-07	-1.01485	0.074	0.177	0.00427367	histone cluster 1 H3 family member d [Source:HGNC Symbol;Acc:HGNC:4767]	8	Neuronal Precursors
POLE4	2.15383e-07	-0.575898	0.098	0.211	0.0045209	DNA polymerase epsilon 4, accessory subunit [Source:HGNC Symbol;Acc:HGNC:18755]	8	Neuronal Precursors
PABPC1	6.06914e-07	0.620314	0.566	0.458	0.0127391	poly(A) binding protein cytoplasmic 1 [Source:HGNC Symbol;Acc:HGNC:8554]	8	Neuronal Precursors
NPTX2	1.37308e-06	-0.370058	0.053	0.144	0.0288209	neuronal pentraxin 2 [Source:HGNC Symbol;Acc:HGNC:7953]	8	Neuronal Precursors
TAF9B	1.1438e-100	-0.447165	0.002	0.527	2.40083e-96	TATA-box binding protein associated factor 9b [Source:HGNC Symbol;Acc:HGNC:17306]	9	Neuronal Precursors
NNAT	4.3477e-99	-1.49611	0.267	0.926	9.12582e-95	neuronatin [Source:HGNC Symbol;Acc:HGNC:7860]	9	Neuronal Precursors
PEG3	7.39642e-93	0.833441	0.558	0	1.55251e-88	paternally expressed 3 [Source:HGNC Symbol;Acc:HGNC:8826]	9	Neuronal Precursors
RBMX	1.59688e-85	0.763985	1	0.992	3.35185e-81	RNA binding motif protein X-linked [Source:HGNC Symbol;Acc:HGNC:9910]	9	Neuronal Precursors
HIST1H3D	1.92833e-49	-0.859141	0.832	0.963	4.04756e-45	histone cluster 1 H3 family member d [Source:HGNC Symbol;Acc:HGNC:4767]	9	Neuronal Precursors
HIST1H1B	6.7766e-43	-0.821147	0.909	0.955	1.42241e-38	histone cluster 1 H1 family member b [Source:HGNC Symbol;Acc:HGNC:4719]	9	Neuronal Precursors
GNPDA1	1.66202e-42	-0.386633	0.139	0.558	3.48857e-38	glucosamine-6-phosphate deaminase 1 [Source:HGNC Symbol;Acc:HGNC:4417]	9	Neuronal Precursors
PCDHB5	1.6006e-41	0.38686	0.402	0.04	3.35966e-37	protocadherin beta 5 [Source:HGNC Symbol;Acc:HGNC:8690]	9	Neuronal Precursors
MTRNR2L12	2.38649e-36	-0.593206	0.816	0.955	5.00923e-32	MT-RNR2 like 12 [Source:HGNC Symbol;Acc:HGNC:37169]	9	Neuronal Precursors
PKIB	1.03472e-33	0.366486	0.363	0.048	2.17187e-29	cAMP-dependent protein kinase inhibitor beta [Source:HGNC Symbol;Acc:HGNC:9018]	9	Neuronal Precursors
CBR1	2.81297e-33	0.277239	0.314	0.023	5.90441e-29	carbonyl reductase 1 [Source:HGNC Symbol;Acc:HGNC:1548]	9	Neuronal Precursors
THOC1	3.6041e-30	0.46859	0.665	0.49	7.56502e-26	THO complex 1 [Source:HGNC Symbol;Acc:HGNC:19070]	9	Neuronal Precursors
HIST1H2AG	2.68068e-28	-0.450823	0.665	0.921	5.62676e-24	histone cluster 1 H2A family member g [Source:HGNC Symbol;Acc:HGNC:4737]	9	Neuronal Precursors
LDHA	8.40108e-28	0.990661	0.815	0.674	1.76339e-23	lactate dehydrogenase A [Source:HGNC Symbol;Acc:HGNC:6535]	9	Neuronal Precursors
MT-ND3	8.74721e-27	-0.53578	0.995	1	1.83604e-22	mitochondrially encoded NADH:ubiquinone oxidoreductase core subunit 3 [Source:HGNC Symbol;Acc:HGNC:7458]	9	Neuronal Precursors
ATP5J2	2.96561e-26	0.400187	0.985	0.98	6.22482e-22	NA	9	Neuronal Precursors
EMC4	8.42015e-26	-0.397754	0.62	0.87	1.76739e-21	ER membrane protein complex subunit 4 [Source:HGNC Symbol;Acc:HGNC:28032]	9	Neuronal Precursors
POLE4	2.84479e-25	-0.416018	0.491	0.79	5.97121e-21	DNA polymerase epsilon 4, accessory subunit [Source:HGNC Symbol;Acc:HGNC:18755]	9	Neuronal Precursors
HIST1H2AL	2.1633e-24	-0.304825	0.287	0.626	4.54076e-20	histone cluster 1 H2A family member l [Source:HGNC Symbol;Acc:HGNC:4730]	9	Neuronal Precursors
PSMD14	4.47348e-24	0.389377	0.926	0.926	9.38982e-20	proteasome 26S subunit, non-ATPase 14 [Source:HGNC Symbol;Acc:HGNC:16889]	9	Neuronal Precursors
CBX3	2.33906e-23	0.456378	0.995	0.986	4.90969e-19	chromobox 3 [Source:HGNC Symbol;Acc:HGNC:1553]	9	Neuronal Precursors
RPL39L	4.53596e-23	0.337896	0.34	0.076	9.52098e-19	ribosomal protein L39 like [Source:HGNC Symbol;Acc:HGNC:17094]	9	Neuronal Precursors
SNAPC1	7.82973e-23	-0.288297	0.215	0.53	1.64346e-18	small nuclear RNA activating complex polypeptide 1 [Source:HGNC Symbol;Acc:HGNC:11134]	9	Neuronal Precursors
PABPC1	2.6002e-22	0.454682	0.978	0.966	5.45783e-18	poly(A) binding protein cytoplasmic 1 [Source:HGNC Symbol;Acc:HGNC:8554]	9	Neuronal Precursors
CETN3	1.23409e-20	0.409709	0.813	0.756	2.59035e-16	centrin 3 [Source:HGNC Symbol;Acc:HGNC:1868]	9	Neuronal Precursors
HIST1H2BF	2.26922e-20	-0.323901	0.427	0.734	4.7631e-16	histone cluster 1 H2B family member f [Source:HGNC Symbol;Acc:HGNC:4752]	9	Neuronal Precursors
MT-ATP8	2.40692e-20	0.369924	0.896	0.929	5.05213e-16	mitochondrially encoded ATP synthase membrane subunit 8 [Source:HGNC Symbol;Acc:HGNC:7415]	9	Neuronal Precursors
HNRNPM	4.14955e-19	0.398208	0.995	0.983	8.7099e-15	heterogeneous nuclear ribonucleoprotein M [Source:HGNC Symbol;Acc:HGNC:5046]	9	Neuronal Precursors
TMEM158	6.87778e-19	0.620187	0.641	0.476	1.44365e-14	transmembrane protein 158 (gene/pseudogene) [Source:HGNC Symbol;Acc:HGNC:30293]	9	Neuronal Precursors
SNORA76	1.22548e-18	0.325563	0.655	0.618	2.57228e-14	NA	9	Neuronal Precursors
PABPC4	1.64122e-18	0.412246	0.836	0.759	3.44493e-14	poly(A) binding protein cytoplasmic 4 [Source:HGNC Symbol;Acc:HGNC:8557]	9	Neuronal Precursors
NMT1	1.96832e-18	0.362989	0.835	0.756	4.1315e-14	N-myristoyltransferase 1 [Source:HGNC Symbol;Acc:HGNC:7857]	9	Neuronal Precursors
PEG10	1.22406e-17	0.500819	0.985	0.989	2.56931e-13	paternally expressed 10 [Source:HGNC Symbol;Acc:HGNC:14005]	9	Neuronal Precursors
HIST1H4D	1.72921e-17	-0.271633	0.335	0.623	3.6296e-13	histone cluster 1 H4 family member d [Source:HGNC Symbol;Acc:HGNC:4782]	9	Neuronal Precursors
H1F0	2.23753e-17	0.620002	0.66	0.487	4.69657e-13	H1 histone family member 0 [Source:HGNC Symbol;Acc:HGNC:4714]	9	Neuronal Precursors
HSPA1A	7.23463e-17	0.389227	0.473	0.269	1.51855e-12	heat shock protein family A (Hsp70) member 1A [Source:HGNC Symbol;Acc:HGNC:5232]	9	Neuronal Precursors
FAM32A	7.50481e-17	0.300449	0.866	0.856	1.57526e-12	family with sequence similarity 32 member A [Source:HGNC Symbol;Acc:HGNC:24563]	9	Neuronal Precursors
MT-ATP6	7.59662e-17	-0.410957	0.995	0.997	1.59453e-12	mitochondrially encoded ATP synthase membrane subunit 6 [Source:HGNC Symbol;Acc:HGNC:7414]	9	Neuronal Precursors
MEST	5.39459e-16	0.440911	0.968	0.972	1.13232e-11	mesoderm specific transcript [Source:HGNC Symbol;Acc:HGNC:7028]	9	Neuronal Precursors
NPTX2	6.26749e-16	-0.382048	0.178	0.422	1.31555e-11	neuronal pentraxin 2 [Source:HGNC Symbol;Acc:HGNC:7953]	9	Neuronal Precursors
RBM8A	4.29402e-15	0.278678	0.975	0.992	9.01314e-11	RNA binding motif protein 8A [Source:HGNC Symbol;Acc:HGNC:9905]	9	Neuronal Precursors
NTM	6.53933e-15	0.743489	0.496	0.323	1.3726e-10	neurotrimin [Source:HGNC Symbol;Acc:HGNC:17941]	9	Neuronal Precursors
PSMC1	1.95993e-14	0.290469	0.904	0.912	4.1139e-10	proteasome 26S subunit, ATPase 1 [Source:HGNC Symbol;Acc:HGNC:9547]	9	Neuronal Precursors
VAT1	2.52062e-14	0.363024	0.847	0.816	5.29079e-10	vesicle amine transport 1 [Source:HGNC Symbol;Acc:HGNC:16919]	9	Neuronal Precursors
DPYSL2	1.66907e-13	0.292844	0.966	0.98	3.50339e-09	dihydropyrimidinase like 2 [Source:HGNC Symbol;Acc:HGNC:3014]	9	Neuronal Precursors
HIST1H2AH	1.94225e-13	-0.304371	0.66	0.858	4.07678e-09	histone cluster 1 H2A family member h [Source:HGNC Symbol;Acc:HGNC:13671]	9	Neuronal Precursors
BCYRN1	3.87916e-13	0.892485	0.813	0.759	8.14236e-09	brain cytoplasmic RNA 1 [Source:HGNC Symbol;Acc:HGNC:1022]	9	Neuronal Precursors
METAP2	1.0903e-12	0.308498	0.958	0.963	2.28853e-08	methionyl aminopeptidase 2 [Source:HGNC Symbol;Acc:HGNC:16672]	9	Neuronal Precursors
HIST1H3B	1.3937e-12	-0.304481	0.815	0.941	2.92538e-08	histone cluster 1 H3 family member b [Source:HGNC Symbol;Acc:HGNC:4776]	9	Neuronal Precursors
MT-CO2	2.65322e-12	-0.324243	0.997	0.997	5.56911e-08	mitochondrially encoded cytochrome c oxidase II [Source:HGNC Symbol;Acc:HGNC:7421]	9	Neuronal Precursors
SLITRK2	1.48583e-11	-0.316112	0.318	0.541	3.11876e-07	SLIT and NTRK like family member 2 [Source:HGNC Symbol;Acc:HGNC:13449]	9	Neuronal Precursors
FXR1	1.6998e-11	0.284492	0.952	0.952	3.56788e-07	FMR1 autosomal homolog 1 [Source:HGNC Symbol;Acc:HGNC:4023]	9	Neuronal Precursors
BLCAP	1.72321e-11	0.287736	0.536	0.459	3.61701e-07	BLCAP apoptosis inducing factor [Source:HGNC Symbol;Acc:HGNC:1055]	9	Neuronal Precursors
LPAR2	4.71492e-11	0.256972	0.442	0.297	9.89661e-07	lysophosphatidic acid receptor 2 [Source:HGNC Symbol;Acc:HGNC:3168]	9	Neuronal Precursors
HIST1H3G	6.28512e-11	-0.290336	0.76	0.887	1.31925e-06	histone cluster 1 H3 family member g [Source:HGNC Symbol;Acc:HGNC:4772]	9	Neuronal Precursors
TBCA	7.02585e-11	0.255439	0.986	0.992	1.47473e-06	tubulin folding cofactor A [Source:HGNC Symbol;Acc:HGNC:11579]	9	Neuronal Precursors
MPHOSPH6	8.15631e-11	0.289522	0.887	0.853	1.71201e-06	M-phase phosphoprotein 6 [Source:HGNC Symbol;Acc:HGNC:7214]	9	Neuronal Precursors
GPC3	9.90854e-11	-0.376031	0.753	0.844	2.0798e-06	glypican 3 [Source:HGNC Symbol;Acc:HGNC:4451]	9	Neuronal Precursors
RND2	1.04545e-10	0.436574	0.872	0.853	2.19439e-06	Rho family GTPase 2 [Source:HGNC Symbol;Acc:HGNC:18315]	9	Neuronal Precursors
HIST2H2AC	3.36706e-10	-0.349744	0.804	0.909	7.06746e-06	histone cluster 2 H2A family member c [Source:HGNC Symbol;Acc:HGNC:4738]	9	Neuronal Precursors
MARCKSL1	4.18802e-10	0.267696	0.998	1	8.79065e-06	MARCKS like 1 [Source:HGNC Symbol;Acc:HGNC:7142]	9	Neuronal Precursors
RPL27A	6.86994e-10	-0.259402	0.997	0.992	1.442e-05	ribosomal protein L27a [Source:HGNC Symbol;Acc:HGNC:10329]	9	Neuronal Precursors
MFSD2A	9.50068e-10	0.26664	0.416	0.297	1.99419e-05	major facilitator superfamily domain containing 2A [Source:HGNC Symbol;Acc:HGNC:25897]	9	Neuronal Precursors
MIF	1.92449e-09	-0.257988	0.835	0.938	4.0395e-05	macrophage migration inhibitory factor [Source:HGNC Symbol;Acc:HGNC:7097]	9	Neuronal Precursors
LY6H	2.33096e-09	-0.357535	0.436	0.643	4.89268e-05	lymphocyte antigen 6 family member H [Source:HGNC Symbol;Acc:HGNC:6728]	9	Neuronal Precursors
FDFT1	3.54381e-09	0.287265	0.915	0.909	7.43846e-05	farnesyl-diphosphate farnesyltransferase 1 [Source:HGNC Symbol;Acc:HGNC:3629]	9	Neuronal Precursors
FDFT1	3.54381e-09	0.287265	0.915	0.909	7.43846e-05	farnesyl-diphosphate farnesyltransferase 1 [Source:NCBI gene;Acc:2222]	9	Neuronal Precursors
NES	4.14458e-09	0.349749	0.974	0.935	8.69948e-05	nestin [Source:HGNC Symbol;Acc:HGNC:7756]	9	Neuronal Precursors
TLE4	4.29445e-09	0.366018	0.932	0.907	9.01405e-05	TLE family member 4, transcriptional corepressor [Source:HGNC Symbol;Acc:HGNC:11840]	9	Neuronal Precursors
C1orf61	5.96171e-09	0.644245	0.529	0.368	0.000125136	chromosome 1 open reading frame 61 [Source:HGNC Symbol;Acc:HGNC:30780]	9	Neuronal Precursors
HES6	6.99094e-09	0.672057	0.904	0.881	0.00014674	hes family bHLH transcription factor 6 [Source:HGNC Symbol;Acc:HGNC:18254]	9	Neuronal Precursors
NRARP	8.43739e-09	0.276722	0.771	0.742	0.000177101	NOTCH regulated ankyrin repeat protein [Source:HGNC Symbol;Acc:HGNC:33843]	9	Neuronal Precursors
AMD1	8.61295e-09	0.253521	0.798	0.762	0.000180786	adenosylmethionine decarboxylase 1 [Source:HGNC Symbol;Acc:HGNC:457]	9	Neuronal Precursors
TPI1	9.18183e-09	0.296381	0.997	0.997	0.000192727	triosephosphate isomerase 1 [Source:HGNC Symbol;Acc:HGNC:12009]	9	Neuronal Precursors
DUSP4	1.05747e-08	0.37252	0.532	0.445	0.000221963	dual specificity phosphatase 4 [Source:HGNC Symbol;Acc:HGNC:3070]	9	Neuronal Precursors
TSTD1	2.15514e-08	0.275381	0.569	0.462	0.000452363	thiosulfate sulfurtransferase like domain containing 1 [Source:HGNC Symbol;Acc:HGNC:35410]	9	Neuronal Precursors
IGDCC3	2.76945e-08	0.265598	0.563	0.524	0.000581308	immunoglobulin superfamily DCC subclass member 3 [Source:HGNC Symbol;Acc:HGNC:9700]	9	Neuronal Precursors
HIST1H2AM	3.14186e-08	-0.25465	0.709	0.856	0.000659477	histone cluster 1 H2A family member m [Source:HGNC Symbol;Acc:HGNC:4735]	9	Neuronal Precursors
DDIT4	3.96128e-08	0.403711	0.606	0.592	0.000831473	DNA damage inducible transcript 4 [Source:HGNC Symbol;Acc:HGNC:24944]	9	Neuronal Precursors
HSPE1	6.19482e-08	-0.262091	0.989	0.994	0.00130029	heat shock protein family E (Hsp10) member 1 [Source:HGNC Symbol;Acc:HGNC:5269]	9	Neuronal Precursors
HIST1H4C	1.38257e-07	-0.321991	1	1	0.00290202	histone cluster 1 H4 family member c [Source:HGNC Symbol;Acc:HGNC:4787]	9	Neuronal Precursors
EFEMP1	2.0581e-07	-0.28677	0.127	0.249	0.00431995	EGF containing fibulin extracellular matrix protein 1 [Source:HGNC Symbol;Acc:HGNC:3218]	9	Neuronal Precursors
SPARCL1	2.3907e-07	-0.405078	0.289	0.462	0.00501807	SPARC like 1 [Source:HGNC Symbol;Acc:HGNC:11220]	9	Neuronal Precursors
LINC01158	3.18095e-07	0.254895	0.575	0.609	0.0066768	NA	9	Neuronal Precursors
ENO1	3.55467e-07	0.314819	0.995	0.992	0.00746126	enolase 1 [Source:HGNC Symbol;Acc:HGNC:3350]	9	Neuronal Precursors
CALB2	4.78585e-07	0.646561	0.325	0.181	0.0100455	calbindin 2 [Source:HGNC Symbol;Acc:HGNC:1435]	9	Neuronal Precursors
PCSK1N	6.60341e-07	-0.338545	0.657	0.802	0.0138606	proprotein convertase subtilisin/kexin type 1 inhibitor [Source:HGNC Symbol;Acc:HGNC:17301]	9	Neuronal Precursors
BNIP3	7.63039e-07	0.271095	0.374	0.431	0.0160162	BCL2 interacting protein 3 [Source:HGNC Symbol;Acc:HGNC:1084]	9	Neuronal Precursors
CDO1	7.65285e-07	-0.289019	0.774	0.892	0.0160633	cysteine dioxygenase type 1 [Source:HGNC Symbol;Acc:HGNC:1795]	9	Neuronal Precursors
OLIG3	1.03136e-06	0.297592	0.821	0.742	0.0216482	oligodendrocyte transcription factor 3 [Source:HGNC Symbol;Acc:HGNC:18003]	9	Neuronal Precursors
H1FX	1.54537e-06	0.269226	0.997	1	0.0324372	H1 histone family member X [Source:HGNC Symbol;Acc:HGNC:4722]	9	Neuronal Precursors
IGFBP5	1.93567e-06	-0.276441	0.385	0.552	0.0406297	insulin like growth factor binding protein 5 [Source:HGNC Symbol;Acc:HGNC:5474]	9	Neuronal Precursors
NNAT	1.40126e-65	-2.30307	0.135	0.816	2.94124e-61	neuronatin [Source:HGNC Symbol;Acc:HGNC:7860]	11	Neuronal Precursors
PEG3	1.72499e-51	0.879496	0.424	0	3.62075e-47	paternally expressed 3 [Source:HGNC Symbol;Acc:HGNC:8826]	11	Neuronal Precursors
TAF9B	7.11507e-29	-0.479746	0	0.303	1.49345e-24	TATA-box binding protein associated factor 9b [Source:HGNC Symbol;Acc:HGNC:17306]	11	Neuronal Precursors
ARMCX1	2.37127e-19	-0.429304	0.013	0.266	4.9773e-15	armadillo repeat containing X-linked 1 [Source:HGNC Symbol;Acc:HGNC:18073]	11	Neuronal Precursors
RBMX	2.70141e-18	0.534958	0.996	0.988	5.67026e-14	RNA binding motif protein X-linked [Source:HGNC Symbol;Acc:HGNC:9910]	11	Neuronal Precursors
PKIB	5.79882e-17	0.29194	0.179	0.005	1.21717e-12	cAMP-dependent protein kinase inhibitor beta [Source:HGNC Symbol;Acc:HGNC:9018]	11	Neuronal Precursors
SNORA76	3.49062e-16	0.63781	0.598	0.417	7.32682e-12	NA	11	Neuronal Precursors
GNPDA1	1.83679e-15	-0.420074	0.118	0.412	3.85542e-11	glucosamine-6-phosphate deaminase 1 [Source:HGNC Symbol;Acc:HGNC:4417]	11	Neuronal Precursors
TENM3	2.978e-14	-0.60619	0.384	0.692	6.25083e-10	teneurin transmembrane protein 3 [Source:HGNC Symbol;Acc:HGNC:29944]	11	Neuronal Precursors
PSMD14	3.36241e-14	0.434309	0.773	0.742	7.05769e-10	proteasome 26S subunit, non-ATPase 14 [Source:HGNC Symbol;Acc:HGNC:16889]	11	Neuronal Precursors
MTRNR2L12	1.52564e-13	-0.613208	0.638	0.824	3.20233e-09	MT-RNR2 like 12 [Source:HGNC Symbol;Acc:HGNC:37169]	11	Neuronal Precursors
PCDHB5	2.13332e-13	0.316736	0.258	0.047	4.47783e-09	protocadherin beta 5 [Source:HGNC Symbol;Acc:HGNC:8690]	11	Neuronal Precursors
PABPC1	1.33695e-12	0.484698	0.978	0.948	2.80625e-08	poly(A) binding protein cytoplasmic 1 [Source:HGNC Symbol;Acc:HGNC:8554]	11	Neuronal Precursors
NR2F1	2.65572e-12	-0.636601	0.419	0.695	5.57435e-08	nuclear receptor subfamily 2 group F member 1 [Source:HGNC Symbol;Acc:HGNC:7975]	11	Neuronal Precursors
ATP5J2	1.34807e-11	0.408555	0.9	0.854	2.8296e-07	NA	11	Neuronal Precursors
SFRP1	2.63649e-11	0.595998	0.24	0.057	5.534e-07	secreted frizzled related protein 1 [Source:HGNC Symbol;Acc:HGNC:10776]	11	Neuronal Precursors
AP2B1	9.51418e-11	0.437443	0.747	0.66	1.99703e-06	adaptor related protein complex 2 subunit beta 1 [Source:HGNC Symbol;Acc:HGNC:563]	11	Neuronal Precursors
PABPC4	1.12193e-10	0.439504	0.655	0.588	2.35493e-06	poly(A) binding protein cytoplasmic 4 [Source:HGNC Symbol;Acc:HGNC:8557]	11	Neuronal Precursors
METAP2	1.38412e-09	0.384129	0.904	0.854	2.90526e-05	methionyl aminopeptidase 2 [Source:HGNC Symbol;Acc:HGNC:16672]	11	Neuronal Precursors
SEMA6A	1.54351e-09	-0.389586	0.24	0.494	3.23983e-05	semaphorin 6A [Source:HGNC Symbol;Acc:HGNC:10738]	11	Neuronal Precursors
EN1	2.52674e-09	0.5163	0.38	0.203	5.30362e-05	engrailed homeobox 1 [Source:HGNC Symbol;Acc:HGNC:3342]	11	Neuronal Precursors
RPS28	2.65858e-09	-0.253909	0.996	0.995	5.58036e-05	ribosomal protein S28 [Source:HGNC Symbol;Acc:HGNC:10418]	11	Neuronal Precursors
TPI1	4.50459e-09	0.435701	0.987	0.963	9.45514e-05	triosephosphate isomerase 1 [Source:HGNC Symbol;Acc:HGNC:12009]	11	Neuronal Precursors
THOC1	5.46977e-09	0.423032	0.454	0.3	0.00011481	THO complex 1 [Source:HGNC Symbol;Acc:HGNC:19070]	11	Neuronal Precursors
MAB21L2	8.33782e-09	-0.34865	0.192	0.424	0.000175011	mab-21 like 2 [Source:HGNC Symbol;Acc:HGNC:6758]	11	Neuronal Precursors
NMT1	1.16532e-08	0.355269	0.598	0.494	0.0002446	N-myristoyltransferase 1 [Source:HGNC Symbol;Acc:HGNC:7857]	11	Neuronal Precursors
PGK1	4.57879e-08	0.554911	0.852	0.859	0.000961089	phosphoglycerate kinase 1 [Source:HGNC Symbol;Acc:HGNC:8896]	11	Neuronal Precursors
SRSF5	4.7667e-08	-0.286522	0.764	0.923	0.00100053	serine and arginine rich splicing factor 5 [Source:HGNC Symbol;Acc:HGNC:10787]	11	Neuronal Precursors
PRMT2	6.67784e-08	0.436382	0.581	0.474	0.00140168	protein arginine methyltransferase 2 [Source:HGNC Symbol;Acc:HGNC:5186]	11	Neuronal Precursors
SNAPC1	8.88967e-08	-0.283787	0.105	0.293	0.00186594	small nuclear RNA activating complex polypeptide 1 [Source:HGNC Symbol;Acc:HGNC:11134]	11	Neuronal Precursors
CETN3	1.34561e-07	0.405886	0.572	0.449	0.00282444	centrin 3 [Source:HGNC Symbol;Acc:HGNC:1868]	11	Neuronal Precursors
MT-ND3	1.56216e-07	-0.421529	0.961	0.995	0.00327897	mitochondrially encoded NADH:ubiquinone oxidoreductase core subunit 3 [Source:HGNC Symbol;Acc:HGNC:7458]	11	Neuronal Precursors
PTGR1	1.60944e-07	0.380109	0.397	0.236	0.00337821	prostaglandin reductase 1 [Source:HGNC Symbol;Acc:HGNC:18429]	11	Neuronal Precursors
RPRM	1.82713e-07	-0.369089	0.293	0.519	0.00383514	reprimo, TP53 dependent G2 arrest mediator homolog [Source:HGNC Symbol;Acc:HGNC:24201]	11	Neuronal Precursors
POLE4	3.18353e-07	-0.337097	0.192	0.395	0.00668222	DNA polymerase epsilon 4, accessory subunit [Source:HGNC Symbol;Acc:HGNC:18755]	11	Neuronal Precursors
NES	3.87772e-07	-0.392656	0.86	0.943	0.00813934	nestin [Source:HGNC Symbol;Acc:HGNC:7756]	11	Neuronal Precursors
COL18A1	4.17806e-07	0.334263	0.358	0.189	0.00876974	collagen type XVIII alpha 1 chain [Source:HGNC Symbol;Acc:HGNC:2195]	11	Neuronal Precursors
C1orf43	8.07244e-07	0.308885	0.659	0.615	0.0169441	chromosome 1 open reading frame 43 [Source:HGNC Symbol;Acc:HGNC:29876]	11	Neuronal Precursors
BEX5	8.72137e-07	0.341087	0.227	0.084	0.0183062	brain expressed X-linked 5 [Source:HGNC Symbol;Acc:HGNC:27990]	11	Neuronal Precursors
GDI1	9.31117e-07	0.322056	0.537	0.496	0.0195441	GDP dissociation inhibitor 1 [Source:HGNC Symbol;Acc:HGNC:4226]	11	Neuronal Precursors
MPHOSPH6	9.86435e-07	0.308404	0.576	0.526	0.0207053	M-phase phosphoprotein 6 [Source:HGNC Symbol;Acc:HGNC:7214]	11	Neuronal Precursors
SLC1A3	1.02411e-06	-0.367582	0.175	0.367	0.0214961	solute carrier family 1 member 3 [Source:HGNC Symbol;Acc:HGNC:10941]	11	Neuronal Precursors
PREPL	1.1847e-06	0.26059	0.406	0.385	0.0248669	prolyl endopeptidase like [Source:HGNC Symbol;Acc:HGNC:30228]	11	Neuronal Precursors
AC004540.4	1.52987e-06	0.304034	0.371	0.285	0.0321119	NA	11	Neuronal Precursors
SRSF6	1.99643e-06	-0.294448	0.45	0.658	0.041905	serine and arginine rich splicing factor 6 [Source:HGNC Symbol;Acc:HGNC:10788]	11	Neuronal Precursors
CRABP2	2.25791e-06	0.47425	0.306	0.161	0.0473935	cellular retinoic acid binding protein 2 [Source:HGNC Symbol;Acc:HGNC:2339]	11	Neuronal Precursors
NNAT	2.42491e-18	-1.35301	0.246	0.875	5.08988e-14	neuronatin [Source:HGNC Symbol;Acc:HGNC:7860]	15	Neuronal Precursors
RBMX	2.62689e-18	0.775904	1	1	5.51385e-14	RNA binding motif protein X-linked [Source:HGNC Symbol;Acc:HGNC:9910]	15	Neuronal Precursors
PEG3	3.583e-17	0.6933	0.415	0	7.52072e-13	paternally expressed 3 [Source:HGNC Symbol;Acc:HGNC:8826]	15	Neuronal Precursors
PCDHB5	1.98872e-16	0.629754	0.477	0.014	4.17433e-12	protocadherin beta 5 [Source:HGNC Symbol;Acc:HGNC:8690]	15	Neuronal Precursors
HIST1H3D	2.87445e-13	-1.32632	0.831	0.979	6.03347e-09	histone cluster 1 H3 family member d [Source:HGNC Symbol;Acc:HGNC:4767]	15	Neuronal Precursors
HIST1H1B	4.63842e-11	-0.849467	0.846	1	9.73605e-07	histone cluster 1 H1 family member b [Source:HGNC Symbol;Acc:HGNC:4719]	15	Neuronal Precursors
LINC01158	1.89564e-09	0.664234	1	0.986	3.97894e-05	NA	15	Neuronal Precursors
TAF9B	6.53662e-09	-0.338892	0	0.285	0.000137204	TATA-box binding protein associated factor 9b [Source:HGNC Symbol;Acc:HGNC:17306]	15	Neuronal Precursors
HIST1H4D	7.10691e-09	-0.640285	0.231	0.674	0.000149174	histone cluster 1 H4 family member d [Source:HGNC Symbol;Acc:HGNC:4782]	15	Neuronal Precursors
PABPC1	1.5531e-08	0.528787	0.969	0.965	0.000325996	poly(A) binding protein cytoplasmic 1 [Source:HGNC Symbol;Acc:HGNC:8554]	15	Neuronal Precursors
MTRNR2L12	2.6324e-08	-0.695171	0.754	0.944	0.000552542	MT-RNR2 like 12 [Source:HGNC Symbol;Acc:HGNC:37169]	15	Neuronal Precursors
HIST1H2AG	7.74209e-08	-0.794152	0.677	0.896	0.00162506	histone cluster 1 H2A family member g [Source:HGNC Symbol;Acc:HGNC:4737]	15	Neuronal Precursors
TENM3	1.70172e-07	-0.643156	0.385	0.764	0.00357191	teneurin transmembrane protein 3 [Source:HGNC Symbol;Acc:HGNC:29944]	15	Neuronal Precursors
ZNF385D	1.89577e-07	-0.489769	0.138	0.528	0.00397922	zinc finger protein 385D [Source:HGNC Symbol;Acc:HGNC:26191]	15	Neuronal Precursors
HIST2H2AC	5.21467e-07	-0.782433	0.8	0.958	0.0109456	histone cluster 2 H2A family member c [Source:HGNC Symbol;Acc:HGNC:4738]	15	Neuronal Precursors
CBX3	6.17368e-07	0.445975	1	1	0.0129586	chromobox 3 [Source:HGNC Symbol;Acc:HGNC:1553]	15	Neuronal Precursors
EMC4	7.2489e-07	-0.495259	0.446	0.812	0.0152154	ER membrane protein complex subunit 4 [Source:HGNC Symbol;Acc:HGNC:28032]	15	Neuronal Precursors
POLE4	7.87816e-07	-0.510926	0.215	0.597	0.0165363	DNA polymerase epsilon 4, accessory subunit [Source:HGNC Symbol;Acc:HGNC:18755]	15	Neuronal Precursors
ZFHX3	1.56245e-06	0.404377	0.508	0.542	0.0327958	zinc finger homeobox 3 [Source:HGNC Symbol;Acc:HGNC:777]	15	Neuronal Precursors

## Sheet: DEgenes_L444P-L444P2
gene	p_val	avg_log2FC	pct,1	pct,2	p_val_adj	description	Cluster	Identity
KRT18	2.30708e-06	-0.487353	0.203	0.512	0.0479619	keratin 18 [Source:HGNC Symbol	16	Radial Glia
ID1	1.97828e-06	-0.71815	0.703	0.894	0.0411265	inhibitor of DNA binding 1; HLH protein [Source:HGNC Symbol	16	Radial Glia
MORF4L2	1.85466e-06	0.412448	0.992	0.959	0.0385566	mortality factor 4 like 2 [Source:HGNC Symbol	16	Radial Glia
RPLP1	7.67948e-07	-0.297455	1	1	0.0159649	ribosomal protein lateral stalk subunit P1 [Source:HGNC Symbol	16	Radial Glia
EMC10	6.71461e-07	0.339662	0.407	0.122	0.013959	ER membrane protein complex subunit 10 [Source:HGNC Symbol	16	Radial Glia
ID3	6.61428e-07	-0.896549	0.754	0.927	0.0137504	inhibitor of DNA binding 3; HLH protein [Source:HGNC Symbol	16	Radial Glia
MSX1	3.76018e-07	-0.810161	0.61	0.805	0.00781705	msh homeobox 1 [Source:HGNC Symbol	16	Radial Glia
LDHA	8.34685e-08	0.827306	0.678	0.366	0.00173523	lactate dehydrogenase A [Source:HGNC Symbol	16	Radial Glia
RN7SL1	6.66755e-08	-0.679226	0.381	0.659	0.00138612	RNA component of signal recognition particle 7SL1 [Source:HGNC Symbol	16	Radial Glia
HMGB2	5.93068e-09	0.770717	0.975	0.805	0.000123293	high mobility group box 2 [Source:HGNC Symbol	16	Radial Glia
CHL1	2.12217e-09	0.823642	0.729	0.341	4.41177e-05	cell adhesion molecule L1 like [Source:HGNC Symbol	16	Radial Glia
TMBIM4,1	1.21342e-09	0.459446	0.78	0.382	2.52257e-05	NA	16	Radial Glia
PRDX4	3.72975e-11	0.629713	0.958	0.886	7.75378e-07	peroxiredoxin 4 [Source:HGNC Symbol	16	Radial Glia
S100A6	9.66956e-12	-0.836261	0	0.26	2.0102e-07	S100 calcium binding protein A6 [Source:HGNC Symbol	16	Radial Glia
EDNRB	2.433e-12	0.700116	0.576	0.146	5.05796e-08	endothelin receptor type B [Source:HGNC Symbol	16	Radial Glia
BTF3	1.80407e-12	0.578173	1	0.984	3.75048e-08	basic transcription factor 3 [Source:HGNC Symbol	16	Radial Glia
TMEM132C	5.50382e-14	-0.358057	0	0.309	1.14419e-09	transmembrane protein 132C [Source:HGNC Symbol	16	Radial Glia
7SK,2	6.45776e-23	-1.56449	0.822	0.935	1.3425e-18	NA	16	Radial Glia
7SK,2	1.45294e-32	-1.94452	0.87	0.991	3.02051e-28	NA	15	Radial Glia
PEG10	5.22486e-13	-1.45566	0.565	0.786	1.0862e-08	paternally expressed 10 [Source:HGNC Symbol	15	Radial Glia
GDF15	8.05094e-13	1.48632	0.87	0.581	1.67371e-08	growth differentiation factor 15 [Source:HGNC Symbol	15	Radial Glia
BTF3	1.83136e-12	0.567846	1	0.983	3.80721e-08	basic transcription factor 3 [Source:HGNC Symbol	15	Radial Glia
DLK1	2.08167e-12	1.26917	0.989	0.923	4.32759e-08	delta like non-canonical Notch ligand 1 [Source:HGNC Symbol	15	Radial Glia
H2AFJ	4.79512e-12	0.758512	0.52	0.137	9.96857e-08	H2A histone family member J [Source:HGNC Symbol	15	Radial Glia
SAT1	2.424e-11	1.02822	0.847	0.641	5.03925e-07	spermidine/spermine N1-acetyltransferase 1 [Source:HGNC Symbol	15	Radial Glia
CHCHD2	6.83668e-11	-0.627566	0.864	0.974	1.42128e-06	coiled-coil-helix-coiled-coil-helix domain containing 2 [Source:HGNC Symbol	15	Radial Glia
SLC25A6	8.63336e-10	0.629238	0.932	0.829	1.79479e-05	solute carrier family 25 member 6 [Source:HGNC Symbol	15	Radial Glia
TMBIM4,1	1.27921e-09	0.559289	0.435	0.128	2.65934e-05	NA	15	Radial Glia
PHYHIPL	2.01276e-09	-0.55032	0.085	0.35	4.18433e-05	phytanoyl-CoA 2-hydroxylase interacting protein like [Source:HGNC Symbol	15	Radial Glia
S100A6	2.30632e-09	-0.294807	0	0.162	4.79461e-05	S100 calcium binding protein A6 [Source:HGNC Symbol	15	Radial Glia
ATP6V1H	6.56322e-09	0.65086	0.593	0.291	0.000136443	ATPase H+ transporting V1 subunit H [Source:HGNC Symbol	15	Radial Glia
NEAT1	1.2316e-08	1.24542	0.898	0.761	0.000256036	nuclear paraspeckle assembly transcript 1 [Source:HGNC Symbol	15	Radial Glia
EIF1	1.25469e-08	0.482589	1	0.991	0.000260837	eukaryotic translation initiation factor 1 [Source:HGNC Symbol	15	Radial Glia
NPC2	2.35886e-08	0.637625	0.91	0.761	0.000490383	NPC intracellular cholesterol transporter 2 [Source:HGNC Symbol	15	Radial Glia
GAPDH	4.36033e-08	-0.614888	0.989	1	0.000906469	glyceraldehyde-3-phosphate dehydrogenase [Source:HGNC Symbol	15	Radial Glia
SNHG8	4.79672e-08	0.629839	0.938	0.855	0.00099719	small nucleolar RNA host gene 8 [Source:HGNC Symbol	15	Radial Glia
EEF2	5.54348e-08	0.419836	0.994	0.974	0.00115243	eukaryotic translation elongation factor 2 [Source:HGNC Symbol	15	Radial Glia
RUNX1T1	7.4672e-08	-0.518325	0.107	0.385	0.00155236	RUNX1 partner transcriptional co-repressor 1 [Source:HGNC Symbol	15	Radial Glia
YBX1	1.09723e-07	-0.442091	0.989	0.991	0.00228104	Y-box binding protein 1 [Source:HGNC Symbol	15	Radial Glia
MORF4L2	1.27482e-07	0.457898	0.972	0.803	0.00265023	mortality factor 4 like 2 [Source:HGNC Symbol	15	Radial Glia
WBP5	1.38218e-07	0.637411	0.864	0.701	0.00287341	NA	15	Radial Glia
NPM1	1.66351e-07	0.454618	1	0.991	0.00345827	nucleophosmin 1 [Source:HGNC Symbol	15	Radial Glia
CCNG1	2.14566e-07	0.503917	0.932	0.855	0.00446061	cyclin G1 [Source:HGNC Symbol	15	Radial Glia
RPL36AL	2.1716e-07	0.503583	0.972	0.923	0.00451454	ribosomal protein L36a like [Source:HGNC Symbol	15	Radial Glia
WASF1	2.21745e-07	-0.26127	0.107	0.376	0.00460985	WASP family member 1 [Source:HGNC Symbol	15	Radial Glia
CKB	2.59033e-07	-0.659814	0.898	0.966	0.00538503	creatine kinase B [Source:HGNC Symbol	15	Radial Glia
TCEAL8	2.67356e-07	0.528966	0.78	0.624	0.00555805	transcription elongation factor A like 8 [Source:HGNC Symbol	15	Radial Glia
SET	2.79909e-07	-0.345113	0.994	0.957	0.00581904	SET nuclear proto-oncogene [Source:HGNC Symbol	15	Radial Glia
MARCKS	4.05288e-07	-0.555331	0.915	0.974	0.00842554	myristoylated alanine rich protein kinase C substrate [Source:HGNC Symbol	15	Radial Glia
RN7SL1	5.23149e-07	-0.571344	0.277	0.573	0.0108757	RNA component of signal recognition particle 7SL1 [Source:HGNC Symbol	15	Radial Glia
MEIS2	6.00904e-07	-0.728904	0.333	0.615	0.0124922	Meis homeobox 2 [Source:HGNC Symbol	15	Radial Glia
C1orf54	6.06416e-07	0.606941	0.836	0.615	0.0126068	chromosome 1 open reading frame 54 [Source:HGNC Symbol	15	Radial Glia
EDNRB	6.1311e-07	0.480182	0.407	0.128	0.0127459	endothelin receptor type B [Source:HGNC Symbol	15	Radial Glia
KNOP1	6.39572e-07	-0.407869	0.311	0.624	0.0132961	lysine rich nucleolar protein 1 [Source:HGNC Symbol	15	Radial Glia
PAFAH1B3	7.23503e-07	-0.511631	0.458	0.726	0.0150409	platelet activating factor acetylhydrolase 1b catalytic subunit 3 [Source:HGNC Symbol	15	Radial Glia
FABP5	9.06168e-07	-0.503962	0.429	0.735	0.0188383	fatty acid binding protein 5 [Source:HGNC Symbol	15	Radial Glia
KRT8	1.09659e-06	0.444095	0.299	0.068	0.022797	keratin 8 [Source:HGNC Symbol	15	Radial Glia
SLC44A2	1.18826e-06	0.497351	0.712	0.427	0.0247027	solute carrier family 44 member 2 [Source:HGNC Symbol	15	Radial Glia
APOE	1.3679e-06	0.927629	0.559	0.282	0.0284373	apolipoprotein E [Source:HGNC Symbol	15	Radial Glia
CEBPD	1.3907e-06	0.989205	0.362	0.111	0.0289113	CCAAT enhancer binding protein delta [Source:HGNC Symbol	15	Radial Glia
TMSB15A	1.49867e-06	-0.592798	0.379	0.632	0.0311558	thymosin beta 15a [Source:HGNC Symbol	15	Radial Glia
DPYSL2	2.04782e-06	-0.490028	0.446	0.726	0.0425722	dihydropyrimidinase like 2 [Source:HGNC Symbol	15	Radial Glia
S100A6	1.5117e-28	-1.23136	0	0.363	3.14267e-24	S100 calcium binding protein A6 [Source:HGNC Symbol	14	Astrocytes
TMBIM4,1	9.02517e-20	0.70289	0.645	0.214	1.87624e-15	NA	14	Astrocytes
TXNIP	1.33298e-18	0.833518	0.909	0.764	2.77113e-14	thioredoxin interacting protein [Source:HGNC Symbol	14	Astrocytes
IGF2	2.59886e-17	-1.31449	0.485	0.819	5.40276e-13	insulin like growth factor 2 [Source:HGNC Symbol	14	Astrocytes
7SK,2	5.2659e-17	-0.936775	0.823	0.918	1.09473e-12	NA	14	Astrocytes
RPS29	4.74299e-15	-0.424768	1	0.989	9.86019e-11	ribosomal protein S29 [Source:HGNC Symbol	14	Astrocytes
POSTN	1.47208e-14	-0.937831	0.195	0.571	3.06031e-10	periostin [Source:HGNC Symbol	14	Astrocytes
MT-CO3	1.65027e-13	0.519105	0.996	1	3.43075e-09	mitochondrially encoded cytochrome c oxidase III [Source:HGNC Symbol	14	Astrocytes
MORF4L2	6.33179e-12	0.437138	0.983	0.951	1.31632e-07	mortality factor 4 like 2 [Source:HGNC Symbol	14	Astrocytes
TMEM132C	1.11027e-11	-0.253695	0.004	0.181	2.30813e-07	transmembrane protein 132C [Source:HGNC Symbol	14	Astrocytes
MT-CO1	9.03153e-11	0.436023	0.996	1	1.87757e-06	mitochondrially encoded cytochrome c oxidase I [Source:HGNC Symbol	14	Astrocytes
RPL18A	1.11759e-10	-0.285881	1	1	2.32336e-06	ribosomal protein L18a [Source:HGNC Symbol	14	Astrocytes
SHOX2	1.14729e-10	-0.32628	0.039	0.264	2.3851e-06	short stature homeobox 2 [Source:HGNC Symbol	14	Astrocytes
RPS27L	1.99181e-10	0.508896	0.939	0.929	4.14077e-06	ribosomal protein S27 like [Source:HGNC Symbol	14	Astrocytes
RPLP1	2.45207e-10	-0.287794	1	1	5.09761e-06	ribosomal protein lateral stalk subunit P1 [Source:HGNC Symbol	14	Astrocytes
ATPIF1	5.98389e-10	0.415757	0.939	0.934	1.24399e-05	NA	14	Astrocytes
NGFRAP1	7.70203e-10	0.410027	0.996	0.978	1.60118e-05	NA	14	Astrocytes
RPS28	1.42984e-09	-0.266174	0.996	0.989	2.97249e-05	ribosomal protein S28 [Source:HGNC Symbol	14	Astrocytes
MFAP4	2.42834e-09	0.755331	0.866	0.731	5.04828e-05	microfibril associated protein 4 [Source:HGNC Symbol	14	Astrocytes
CHCHD2	4.1603e-09	-0.362232	0.931	0.951	8.64885e-05	coiled-coil-helix-coiled-coil-helix domain containing 2 [Source:HGNC Symbol	14	Astrocytes
TPT1	5.05802e-09	-0.321863	1	1	0.000105151	tumor protein; translationally-controlled 1 [Source:HGNC Symbol	14	Astrocytes
RN7SL1	6.18992e-09	-0.523021	0.277	0.566	0.000128682	RNA component of signal recognition particle 7SL1 [Source:HGNC Symbol	14	Astrocytes
COL1A1	7.56658e-09	0.699505	1	0.995	0.000157302	collagen type I alpha 1 chain [Source:HGNC Symbol	14	Astrocytes
H2AFJ	1.1766e-08	0.517892	0.74	0.544	0.000244604	H2A histone family member J [Source:HGNC Symbol	14	Astrocytes
ATP6AP2	1.53309e-08	0.326989	0.9	0.918	0.000318714	ATPase H+ transporting accessory protein 2 [Source:HGNC Symbol	14	Astrocytes
LAMA4	2.74721e-08	-0.464177	0.459	0.731	0.000571117	laminin subunit alpha 4 [Source:HGNC Symbol	14	Astrocytes
GOPC	3.28383e-08	0.444109	0.745	0.544	0.000682675	golgi associated PDZ and coiled-coil motif containing [Source:HGNC Symbol	14	Astrocytes
SLC44A2	3.98739e-08	0.349162	0.463	0.275	0.000828939	solute carrier family 44 member 2 [Source:HGNC Symbol	14	Astrocytes
CLEC11A	5.48204e-08	0.541502	0.567	0.291	0.00113966	C-type lectin domain containing 11A [Source:HGNC Symbol	14	Astrocytes
USP11	6.60691e-08	0.382016	0.727	0.703	0.00137351	ubiquitin specific peptidase 11 [Source:HGNC Symbol	14	Astrocytes
ITM2A	8.13121e-08	0.657612	0.468	0.231	0.0016904	integral membrane protein 2A [Source:HGNC Symbol	14	Astrocytes
PRDX4	8.71299e-08	0.497528	0.97	0.951	0.00181134	peroxiredoxin 4 [Source:HGNC Symbol	14	Astrocytes
GAS6	1.20276e-07	0.468467	0.584	0.352	0.00250042	growth arrest specific 6 [Source:HGNC Symbol	14	Astrocytes
RPL37	1.93137e-07	-0.258408	1	1	0.00401513	ribosomal protein L37 [Source:HGNC Symbol	14	Astrocytes
COMT	2.21099e-07	0.323368	0.39	0.192	0.00459643	catechol-O-methyltransferase [Source:HGNC Symbol	14	Astrocytes
NKX2-5	3.04413e-07	0.753816	0.169	0.088	0.00632845	NK2 homeobox 5 [Source:HGNC Symbol	14	Astrocytes
VAMP2	4.15541e-07	0.365148	0.797	0.731	0.00863868	vesicle associated membrane protein 2 [Source:HGNC Symbol	14	Astrocytes
MT-CYB	4.46005e-07	0.322585	0.996	0.989	0.00927201	mitochondrially encoded cytochrome b [Source:HGNC Symbol	14	Astrocytes
C7orf55	4.9186e-07	0.286896	0.372	0.275	0.0102253	NA	14	Astrocytes
ATF3	6.26714e-07	-0.546654	0.55	0.78	0.0130288	activating transcription factor 3 [Source:HGNC Symbol	14	Astrocytes
HMGA2	7.27115e-07	-0.434386	0.203	0.412	0.015116	high mobility group AT-hook 2 [Source:HGNC Symbol	14	Astrocytes
DDX3X	7.37938e-07	-0.412159	0.684	0.846	0.015341	DEAD-box helicase 3 X-linked [Source:HGNC Symbol	14	Astrocytes
S100A16	7.92202e-07	0.339548	0.32	0.154	0.0164691	S100 calcium binding protein A16 [Source:HGNC Symbol	14	Astrocytes
TMEM47	8.15286e-07	0.381908	0.407	0.236	0.016949	transmembrane protein 47 [Source:HGNC Symbol	14	Astrocytes
PTGER4	9.10215e-07	-0.252742	0.061	0.236	0.0189225	prostaglandin E receptor 4 [Source:HGNC Symbol	14	Astrocytes
KLHL13	1.19163e-06	0.338964	0.242	0.093	0.0247727	kelch like family member 13 [Source:HGNC Symbol	14	Astrocytes
SEC61G	1.41953e-06	0.272467	0.97	0.973	0.0295106	SEC61 translocon gamma subunit [Source:HGNC Symbol	14	Astrocytes
ZDHHC9	1.46429e-06	0.330514	0.532	0.451	0.0304411	zinc finger DHHC-type containing 9 [Source:HGNC Symbol	14	Astrocytes
CD9	1.70608e-06	0.563074	0.571	0.346	0.0354677	CD9 molecule [Source:HGNC Symbol	14	Astrocytes
TMED10	1.77575e-06	0.255982	0.831	0.852	0.0369162	transmembrane p24 trafficking protein 10 [Source:HGNC Symbol	14	Astrocytes
RPL6	1.89127e-06	-0.267063	1	1	0.0393176	ribosomal protein L6 [Source:HGNC Symbol	14	Astrocytes
NPW	2.22155e-06	-0.448508	0.303	0.544	0.0461838	neuropeptide W [Source:HGNC Symbol	14	Astrocytes
EPB41L4A	2.35119e-06	-0.355841	0.116	0.338	0.0488788	erythrocyte membrane protein band 4,1 like 4A [Source:HGNC Symbol	12	Oligodendrocytes
CPXM1	2.34093e-06	-0.473567	0.426	0.635	0.0486656	carboxypeptidase X; M14 family member 1 [Source:HGNC Symbol	12	Oligodendrocytes
CTSL	2.25961e-06	0.354273	0.45	0.228	0.0469751	cathepsin L [Source:HGNC Symbol	12	Oligodendrocytes
ANKRD50	2.15502e-06	-0.50494	0.256	0.461	0.0448007	ankyrin repeat domain 50 [Source:HGNC Symbol	12	Oligodendrocytes
CREB5	2.14954e-06	-0.481999	0.186	0.392	0.0446868	cAMP responsive element binding protein 5 [Source:HGNC Symbol	12	Oligodendrocytes
IGF2BP2	2.13326e-06	-0.478464	0.667	0.814	0.0443483	insulin like growth factor 2 mRNA binding protein 2 [Source:HGNC Symbol	12	Oligodendrocytes
TPI1	2.11539e-06	0.460034	0.977	0.901	0.0439769	triosephosphate isomerase 1 [Source:HGNC Symbol	12	Oligodendrocytes
RASAL2	1.69447e-06	-0.447157	0.264	0.497	0.0352263	RAS protein activator like 2 [Source:HGNC Symbol	12	Oligodendrocytes
NPM1	1.62964e-06	0.36955	0.984	0.976	0.0338786	nucleophosmin 1 [Source:HGNC Symbol	12	Oligodendrocytes
BEX2	1.52326e-06	0.566493	0.519	0.299	0.031667	brain expressed X-linked 2 [Source:HGNC Symbol	12	Oligodendrocytes
THBS1	1.48414e-06	-0.511413	0.171	0.41	0.0308537	thrombospondin 1 [Source:HGNC Symbol	12	Oligodendrocytes
CEBPD	1.47926e-06	0.616656	0.496	0.249	0.0307524	CCAAT enhancer binding protein delta [Source:HGNC Symbol	12	Oligodendrocytes
DDX3X	1.46805e-06	-0.434831	0.721	0.814	0.0305192	DEAD-box helicase 3 X-linked [Source:HGNC Symbol	12	Oligodendrocytes
TBX2	1.46415e-06	-0.428386	0.039	0.219	0.0304382	T-box transcription factor 2 [Source:HGNC Symbol	12	Oligodendrocytes
CHCHD2	1.45222e-06	-0.257375	0.938	0.877	0.0301902	coiled-coil-helix-coiled-coil-helix domain containing 2 [Source:HGNC Symbol	12	Oligodendrocytes
LPAR1	1.44463e-06	-0.519185	0.155	0.356	0.0300325	lysophosphatidic acid receptor 1 [Source:HGNC Symbol	12	Oligodendrocytes
PJA2	1.3546e-06	-0.508418	0.659	0.811	0.0281608	praja ring finger ubiquitin ligase 2 [Source:HGNC Symbol	12	Oligodendrocytes
CSRP2	1.31723e-06	0.660428	0.558	0.314	0.0273839	cysteine and glycine rich protein 2 [Source:HGNC Symbol	12	Oligodendrocytes
SCARB2	1.28714e-06	-0.437037	0.76	0.823	0.0267584	scavenger receptor class B member 2 [Source:HGNC Symbol	12	Oligodendrocytes
TUBB2A	1.20777e-06	0.504858	0.736	0.614	0.0251084	tubulin beta 2A class IIa [Source:HGNC Symbol	12	Oligodendrocytes
FILIP1L	1.20134e-06	-0.495485	0.132	0.365	0.0249746	filamin A interacting protein 1 like [Source:HGNC Symbol	12	Oligodendrocytes
COL20A1	1.19818e-06	-0.457164	0.054	0.249	0.0249091	collagen type XX alpha 1 chain [Source:HGNC Symbol	12	Oligodendrocytes
DAB2	1.18401e-06	-0.778503	0.318	0.575	0.0246144	DAB adaptor protein 2 [Source:HGNC Symbol	12	Oligodendrocytes
PDE1C	1.04921e-06	-0.529531	0.07	0.269	0.021812	phosphodiesterase 1C [Source:HGNC Symbol	12	Oligodendrocytes
SSBP2	9.90089e-07	0.260243	0.643	0.374	0.020583	single stranded DNA binding protein 2 [Source:HGNC Symbol	12	Oligodendrocytes
RND3	9.35854e-07	-0.592233	0.543	0.763	0.0194555	Rho family GTPase 3 [Source:HGNC Symbol	12	Oligodendrocytes
ATP1B3	9.34011e-07	0.500293	0.744	0.566	0.0194172	ATPase Na+/K+ transporting subunit beta 3 [Source:HGNC Symbol	12	Oligodendrocytes
PLIN2	9.25089e-07	0.423957	0.442	0.237	0.0192317	perilipin 2 [Source:HGNC Symbol	12	Oligodendrocytes
HIST1H4E	9.23481e-07	-0.421403	0.194	0.446	0.0191982	histone cluster 1 H4 family member e [Source:HGNC Symbol	12	Oligodendrocytes
SNCG	8.57622e-07	0.444828	0.264	0.075	0.0178291	synuclein gamma [Source:HGNC Symbol	12	Oligodendrocytes
ADAMTS1	8.19515e-07	-0.583581	0.209	0.452	0.0170369	ADAM metallopeptidase with thrombospondin type 1 motif 1 [Source:HGNC Symbol	12	Oligodendrocytes
MAP3K4	7.88674e-07	-0.642002	0.372	0.608	0.0163957	mitogen-activated protein kinase kinase kinase 4 [Source:HGNC Symbol	12	Oligodendrocytes
RPS12	7.12899e-07	0.339949	1	0.997	0.0148205	ribosomal protein S12 [Source:HGNC Symbol	12	Oligodendrocytes
GPM6B	6.84288e-07	-0.626691	0.643	0.817	0.0142257	glycoprotein M6B [Source:HGNC Symbol	12	Oligodendrocytes
SOX6	5.62936e-07	-0.427679	0.31	0.584	0.0117029	SRY-box transcription factor 6 [Source:HGNC Symbol	12	Oligodendrocytes
MAP4K4	5.29151e-07	-0.613441	0.651	0.802	0.0110005	mitogen-activated protein kinase kinase kinase kinase 4 [Source:HGNC Symbol	12	Oligodendrocytes
DCN	5.23446e-07	1.02383	0.171	0.027	0.0108819	decorin [Source:HGNC Symbol	12	Oligodendrocytes
TBX3	4.9698e-07	0.2816	0.124	0.012	0.0103317	T-box transcription factor 3 [Source:HGNC Symbol	12	Oligodendrocytes
TWIST1	4.85694e-07	0.311062	0.178	0.027	0.0100971	twist family bHLH transcription factor 1 [Source:HGNC Symbol	12	Oligodendrocytes
VCAN	4.00329e-07	-0.691905	0.713	0.88	0.00832245	versican [Source:HGNC Symbol	12	Oligodendrocytes
PLS3	3.90148e-07	-0.623734	0.674	0.85	0.00811078	plastin 3 [Source:HGNC Symbol	12	Oligodendrocytes
FER	3.90111e-07	-0.473311	0.24	0.479	0.00811001	FER tyrosine kinase [Source:HGNC Symbol	12	Oligodendrocytes
CADM1	3.84887e-07	-0.413254	0.504	0.76	0.00800142	cell adhesion molecule 1 [Source:HGNC Symbol	12	Oligodendrocytes
NUDT4	3.68505e-07	-0.632468	0.519	0.713	0.00766084	nudix hydrolase 4 [Source:HGNC Symbol	12	Oligodendrocytes
ARMCX3	3.60072e-07	-0.509909	0.736	0.841	0.00748553	armadillo repeat containing X-linked 3 [Source:HGNC Symbol	12	Oligodendrocytes
FREM2	3.55138e-07	-0.381618	0.062	0.266	0.00738297	FRAS1 related extracellular matrix 2 [Source:HGNC Symbol	12	Oligodendrocytes
ACTG1	3.52603e-07	0.37757	0.984	0.997	0.00733026	actin gamma 1 [Source:HGNC Symbol	12	Oligodendrocytes
RPL22L1	3.41991e-07	0.502627	0.868	0.737	0.00710965	ribosomal protein L22 like 1 [Source:HGNC Symbol	12	Oligodendrocytes
TXNIP	3.35244e-07	0.676996	0.783	0.572	0.00696939	thioredoxin interacting protein [Source:HGNC Symbol	12	Oligodendrocytes
KLF9	3.21305e-07	-0.492209	0.155	0.383	0.00667961	Kruppel like factor 9 [Source:HGNC Symbol	12	Oligodendrocytes
SH3D19	3.19712e-07	-0.466601	0.178	0.422	0.00664649	SH3 domain containing 19 [Source:HGNC Symbol	12	Oligodendrocytes
SLC2A4RG	3.06801e-07	0.426292	0.574	0.368	0.00637808	SLC2A4 regulator [Source:HGNC Symbol	12	Oligodendrocytes
S100A10	3.06401e-07	-0.477708	0.791	0.949	0.00636976	S100 calcium binding protein A10 [Source:HGNC Symbol	12	Oligodendrocytes
SORBS2	2.99005e-07	-0.450917	0.434	0.707	0.00621601	sorbin and SH3 domain containing 2 [Source:HGNC Symbol	12	Oligodendrocytes
JPH1	2.91443e-07	-0.465464	0.078	0.275	0.0060588	junctophilin 1 [Source:HGNC Symbol	12	Oligodendrocytes
TCEA3	2.76236e-07	0.253681	0.163	0.021	0.00574267	transcription elongation factor A3 [Source:HGNC Symbol	12	Oligodendrocytes
C1orf198	2.68102e-07	-0.600948	0.388	0.605	0.00557357	chromosome 1 open reading frame 198 [Source:HGNC Symbol	12	Oligodendrocytes
RCAN1	2.60596e-07	-0.681203	0.248	0.503	0.00541753	regulator of calcineurin 1 [Source:HGNC Symbol	12	Oligodendrocytes
ADARB1	2.57555e-07	-0.501598	0.155	0.344	0.0053543	adenosine deaminase RNA specific B1 [Source:HGNC Symbol	12	Oligodendrocytes
RP11-118F19,1	2.47265e-07	-0.343103	0.24	0.515	0.00514039	NA	12	Oligodendrocytes
ALDOA	2.45161e-07	0.592278	0.922	0.829	0.00509666	aldolase; fructose-bisphosphate A [Source:HGNC Symbol	12	Oligodendrocytes
LINC00473	1.97203e-07	0.342456	0.364	0.132	0.00409965	NA	12	Oligodendrocytes
MAML2	1.92726e-07	-0.679319	0.442	0.653	0.00400657	mastermind like transcriptional coactivator 2 [Source:HGNC Symbol	12	Oligodendrocytes
NGFRAP1	1.90137e-07	0.350315	0.992	0.937	0.00395276	NA	12	Oligodendrocytes
SPTAN1	1.79887e-07	-0.597105	0.636	0.775	0.00373967	spectrin alpha; non-erythrocytic 1 [Source:HGNC Symbol	12	Oligodendrocytes
ATP5G3	1.7698e-07	0.458844	0.969	0.862	0.00367923	NA	12	Oligodendrocytes
TJP1	1.76215e-07	-0.557999	0.752	0.856	0.00366333	tight junction protein 1 [Source:HGNC Symbol	12	Oligodendrocytes
SLITRK2	1.44458e-07	-0.471639	0.016	0.186	0.00300314	SLIT and NTRK like family member 2 [Source:HGNC Symbol	12	Oligodendrocytes
PTX3	1.40664e-07	-0.781839	0.225	0.482	0.00292427	pentraxin 3 [Source:HGNC Symbol	12	Oligodendrocytes
COL1A2	1.37723e-07	0.971358	0.814	0.668	0.00286312	collagen type I alpha 2 chain [Source:HGNC Symbol	12	Oligodendrocytes
FOSB	1.33193e-07	-0.79268	0.543	0.683	0.00276896	FosB proto-oncogene; AP-1 transcription factor subunit [Source:HGNC Symbol	12	Oligodendrocytes
HINT1	1.28798e-07	0.378713	0.953	0.916	0.00267759	histidine triad nucleotide binding protein 1 [Source:HGNC Symbol	12	Oligodendrocytes
GAB1	1.26109e-07	-0.456362	0.155	0.407	0.00262168	GRB2 associated binding protein 1 [Source:HGNC Symbol	12	Oligodendrocytes
USP53	1.22486e-07	-0.653018	0.186	0.434	0.00254636	ubiquitin specific peptidase 53 [Source:HGNC Symbol	12	Oligodendrocytes
PLP2	8.90093e-08	0.339963	0.349	0.114	0.00185041	proteolipid protein 2 [Source:HGNC Symbol	12	Oligodendrocytes
TFPI2	8.755e-08	1.08278	0.326	0.102	0.00182008	tissue factor pathway inhibitor 2 [Source:HGNC Symbol	12	Oligodendrocytes
GPC3	8.64544e-08	0.757574	0.326	0.219	0.0017973	glypican 3 [Source:HGNC Symbol	12	Oligodendrocytes
RPS27	8.27889e-08	-0.287483	1	1	0.0017211	ribosomal protein S27 [Source:HGNC Symbol	12	Oligodendrocytes
SYNE1	8.08493e-08	-0.707006	0.279	0.509	0.00168078	spectrin repeat containing nuclear envelope protein 1 [Source:HGNC Symbol	12	Oligodendrocytes
MATR3	7.97879e-08	-0.441026	0.86	0.91	0.00165871	matrin 3 [Source:NCBI gene	12	Oligodendrocytes
MATR3	7.97879e-08	-0.441026	0.86	0.91	0.00165871	matrin 3 [Source:HGNC Symbol	12	Oligodendrocytes
NFATC2	7.79589e-08	-0.400433	0.155	0.425	0.00162069	nuclear factor of activated T cells 2 [Source:HGNC Symbol	12	Oligodendrocytes
ROCK2	6.99249e-08	-0.636187	0.643	0.796	0.00145367	Rho associated coiled-coil containing protein kinase 2 [Source:HGNC Symbol	12	Oligodendrocytes
CTSC	6.97361e-08	-0.537694	0.31	0.596	0.00144974	cathepsin C [Source:HGNC Symbol	12	Oligodendrocytes
SPARC	6.80898e-08	-0.471238	0.93	0.97	0.00141552	secreted protein acidic and cysteine rich [Source:HGNC Symbol	12	Oligodendrocytes
TLN1	6.79604e-08	-0.561382	0.612	0.787	0.00141283	talin 1 [Source:HGNC Symbol	12	Oligodendrocytes
HMGA2	6.32743e-08	-0.717305	0.372	0.626	0.00131541	high mobility group AT-hook 2 [Source:HGNC Symbol	12	Oligodendrocytes
TNNI1	6.13856e-08	1.218	0.178	0.027	0.00127615	troponin I1; slow skeletal type [Source:HGNC Symbol	12	Oligodendrocytes
GPR64	6.12815e-08	0.36312	0.202	0.033	0.00127398	NA	12	Oligodendrocytes
NKX2-5	6.05227e-08	0.896969	0.171	0.048	0.00125821	NK2 homeobox 5 [Source:HGNC Symbol	12	Oligodendrocytes
PITX2	5.42493e-08	0.297264	0.171	0.018	0.00112779	paired like homeodomain 2 [Source:HGNC Symbol	12	Oligodendrocytes
SH3PXD2A	5.05699e-08	-0.698577	0.434	0.647	0.0010513	SH3 and PX domains 2A [Source:HGNC Symbol	12	Oligodendrocytes
SPINT2	4.80395e-08	0.561355	0.279	0.09	0.000998693	serine peptidase inhibitor; Kunitz type 2 [Source:HGNC Symbol	12	Oligodendrocytes
GULP1	4.53305e-08	-0.537888	0.411	0.692	0.000942376	GULP PTB domain containing engulfment adaptor 1 [Source:HGNC Symbol	12	Oligodendrocytes
SLC38A1	4.25895e-08	0.446982	0.341	0.162	0.000885392	solute carrier family 38 member 1 [Source:HGNC Symbol	12	Oligodendrocytes
ACTN1	3.83258e-08	0.407632	0.364	0.129	0.000796755	actinin alpha 1 [Source:HGNC Symbol	12	Oligodendrocytes
GFRA3	3.69927e-08	-0.53764	0.147	0.422	0.000769041	GDNF family receptor alpha 3 [Source:HGNC Symbol	12	Oligodendrocytes
ARHGEF26	3.64514e-08	-0.556573	0.155	0.416	0.000757788	Rho guanine nucleotide exchange factor 26 [Source:HGNC Symbol	12	Oligodendrocytes
SPATA6	3.55144e-08	-0.546297	0.357	0.59	0.000738309	spermatogenesis associated 6 [Source:HGNC Symbol	12	Oligodendrocytes
RPL3	3.4539e-08	0.34913	1	1	0.000718032	ribosomal protein L3 [Source:HGNC Symbol	12	Oligodendrocytes
LSAMP	3.1106e-08	-0.563813	0.512	0.751	0.000646664	limbic system associated membrane protein [Source:HGNC Symbol	12	Oligodendrocytes
FIGN	2.92069e-08	-0.527685	0.403	0.68	0.000607183	fidgetin; microtubule severing factor [Source:HGNC Symbol	12	Oligodendrocytes
CNN3	2.70184e-08	-0.510213	0.829	0.868	0.000561685	calponin 3 [Source:HGNC Symbol	12	Oligodendrocytes
MEGF9	2.68192e-08	-0.532258	0.264	0.554	0.000557544	multiple EGF like domains 9 [Source:HGNC Symbol	12	Oligodendrocytes
PPP1R15A	2.64648e-08	-0.582593	0.783	0.898	0.000550177	protein phosphatase 1 regulatory subunit 15A [Source:HGNC Symbol	12	Oligodendrocytes
COL3A1	2.5369e-08	1.29513	0.209	0.036	0.000527397	collagen type III alpha 1 chain [Source:HGNC Symbol	12	Oligodendrocytes
COMT	2.39413e-08	0.30745	0.597	0.302	0.000497716	catechol-O-methyltransferase [Source:HGNC Symbol	12	Oligodendrocytes
PHACTR3	2.35776e-08	-0.542735	0.341	0.638	0.000490154	phosphatase and actin regulator 3 [Source:HGNC Symbol	12	Oligodendrocytes
ARHGAP21	2.34752e-08	-0.603593	0.488	0.701	0.000488025	Rho GTPase activating protein 21 [Source:HGNC Symbol	12	Oligodendrocytes
HSPA12A	2.32006e-08	-0.431058	0.085	0.317	0.000482317	heat shock protein family A (Hsp70) member 12A [Source:HGNC Symbol	12	Oligodendrocytes
PTGDS	2.24788e-08	1.49065	0.457	0.183	0.000467313	prostaglandin D2 synthase [Source:HGNC Symbol	12	Oligodendrocytes
APOD	2.24725e-08	-0.607045	0.178	0.443	0.00046718	apolipoprotein D [Source:HGNC Symbol	12	Oligodendrocytes
IL17D	1.94876e-08	-0.335561	0.078	0.326	0.000405129	interleukin 17D [Source:HGNC Symbol	12	Oligodendrocytes
ECEL1	1.52426e-08	0.85807	0.38	0.159	0.000316878	endothelin converting enzyme like 1 [Source:HGNC Symbol	12	Oligodendrocytes
CAPG	1.48192e-08	0.319255	0.217	0.033	0.000308076	capping actin protein; gelsolin like [Source:HGNC Symbol	12	Oligodendrocytes
HMCN1	1.21203e-08	-0.623748	0.171	0.452	0.000251969	hemicentin 1 [Source:HGNC Symbol	12	Oligodendrocytes
CMTM5	1.13707e-08	-0.524517	0.163	0.437	0.000236385	CKLF like MARVEL transmembrane domain containing 5 [Source:HGNC Symbol	12	Oligodendrocytes
CADM4	1.10091e-08	-0.541065	0.496	0.751	0.000228867	cell adhesion molecule 4 [Source:HGNC Symbol	12	Oligodendrocytes
BMP7	1.0983e-08	0.404729	0.248	0.069	0.000228326	bone morphogenetic protein 7 [Source:HGNC Symbol	12	Oligodendrocytes
RPS14	9.92835e-09	0.381245	0.992	1	0.000206401	ribosomal protein S14 [Source:HGNC Symbol	12	Oligodendrocytes
SLC2A1	9.58833e-09	0.886391	0.372	0.174	0.000199332	solute carrier family 2 member 1 [Source:HGNC Symbol	12	Oligodendrocytes
EDN3	9.00637e-09	0.387925	0.14	0.006	0.000187233	endothelin 3 [Source:HGNC Symbol	12	Oligodendrocytes
EIF4G2	8.65263e-09	-0.479683	0.876	0.952	0.00017988	eukaryotic translation initiation factor 4 gamma 2 [Source:HGNC Symbol	12	Oligodendrocytes
HSP90B1	8.62813e-09	-0.698934	0.915	0.982	0.00017937	heat shock protein 90 beta family member 1 [Source:HGNC Symbol	12	Oligodendrocytes
PRSS12	8.51053e-09	-0.817533	0.14	0.416	0.000176925	serine protease 12 [Source:HGNC Symbol	12	Oligodendrocytes
RBP1	8.27778e-09	1.15107	0.496	0.26	0.000172087	retinol binding protein 1 [Source:HGNC Symbol	12	Oligodendrocytes
COL4A3BP	8.11132e-09	-0.656079	0.62	0.829	0.000168626	NA	12	Oligodendrocytes
GPRC5C	7.69737e-09	0.326795	0.194	0.024	0.000160021	G protein-coupled receptor class C group 5 member C [Source:HGNC Symbol	12	Oligodendrocytes
SNTB1	6.0518e-09	-0.455192	0.093	0.329	0.000125811	syntrophin beta 1 [Source:HGNC Symbol	12	Oligodendrocytes
CLEC11A	5.92586e-09	0.500248	0.45	0.171	0.000123193	C-type lectin domain containing 11A [Source:HGNC Symbol	12	Oligodendrocytes
L1TD1	5.63776e-09	-0.549703	0.202	0.5	0.000117203	LINE1 type transposase domain containing 1 [Source:HGNC Symbol	12	Oligodendrocytes
CNTN6	5.23555e-09	-0.560506	0.07	0.314	0.000108842	contactin 6 [Source:HGNC Symbol	12	Oligodendrocytes
SSR4	4.84553e-09	-0.459377	0.961	0.958	0.000100734	signal sequence receptor subunit 4 [Source:HGNC Symbol	12	Oligodendrocytes
RP3-428L16,2	4.58014e-09	-0.786482	0.256	0.524	9.52166e-05	NA	12	Oligodendrocytes
KHDRBS3	4.06978e-09	-0.655474	0.326	0.614	8.46066e-05	KH RNA binding domain containing; signal transduction associated 3 [Source:HGNC Symbol	12	Oligodendrocytes
ITGA4	3.73904e-09	-0.61428	0.186	0.476	7.77308e-05	integrin subunit alpha 4 [Source:HGNC Symbol	12	Oligodendrocytes
CYR61	3.72401e-09	-0.691889	0.419	0.683	7.74185e-05	NA	12	Oligodendrocytes
MFAP4	3.55821e-09	0.46224	0.178	0.015	7.39717e-05	microfibril associated protein 4 [Source:HGNC Symbol	12	Oligodendrocytes
TUBB2B	3.34367e-09	0.671546	0.884	0.683	6.95116e-05	tubulin beta 2B class IIb [Source:HGNC Symbol	12	Oligodendrocytes
AFAP1L2	2.74092e-09	-0.67599	0.357	0.641	5.69809e-05	actin filament associated protein 1 like 2 [Source:HGNC Symbol	12	Oligodendrocytes
CST3	2.56491e-09	-0.575617	0.946	0.937	5.3322e-05	cystatin C [Source:HGNC Symbol	12	Oligodendrocytes
SCRG1	2.29277e-09	-0.643009	0.132	0.425	4.76643e-05	stimulator of chondrogenesis 1 [Source:HGNC Symbol	12	Oligodendrocytes
KHDRBS2	2.18055e-09	-0.712333	0.07	0.329	4.53315e-05	KH RNA binding domain containing; signal transduction associated 2 [Source:HGNC Symbol	12	Oligodendrocytes
SLC25A6	2.11624e-09	0.485063	0.961	0.925	4.39946e-05	solute carrier family 25 member 6 [Source:HGNC Symbol	12	Oligodendrocytes
AZGP1	2.10476e-09	-0.696757	0.085	0.356	4.37559e-05	alpha-2-glycoprotein 1; zinc-binding [Source:HGNC Symbol	12	Oligodendrocytes
NRP1	1.96356e-09	-0.488989	0.132	0.425	4.08204e-05	neuropilin 1 [Source:HGNC Symbol	12	Oligodendrocytes
APCDD1	1.74541e-09	1.16506	0.519	0.287	3.62852e-05	APC down-regulated 1 [Source:HGNC Symbol	12	Oligodendrocytes
TXN	1.15125e-09	0.551099	0.938	0.844	2.39333e-05	thioredoxin [Source:HGNC Symbol	12	Oligodendrocytes
SERPINF1	8.91381e-10	0.43203	0.411	0.132	1.85309e-05	serpin family F member 1 [Source:HGNC Symbol	12	Oligodendrocytes
FRMD6	8.87195e-10	-0.722566	0.364	0.668	1.84439e-05	FERM domain containing 6 [Source:HGNC Symbol	12	Oligodendrocytes
RAPGEF2	8.03787e-10	-0.557363	0.178	0.47	1.67099e-05	Rap guanine nucleotide exchange factor 2 [Source:HGNC Symbol	12	Oligodendrocytes
STARD13	7.46798e-10	-0.674839	0.209	0.512	1.55252e-05	StAR related lipid transfer domain containing 13 [Source:HGNC Symbol	12	Oligodendrocytes
ITGA1	6.6698e-10	-0.678124	0.116	0.395	1.38658e-05	integrin subunit alpha 1 [Source:HGNC Symbol	12	Oligodendrocytes
SORBS1	6.29132e-10	-0.56362	0.171	0.464	1.3079e-05	sorbin and SH3 domain containing 1 [Source:HGNC Symbol	12	Oligodendrocytes
TPT1	5.47793e-10	-0.373487	1	1	1.13881e-05	tumor protein; translationally-controlled 1 [Source:HGNC Symbol	12	Oligodendrocytes
TGFBR3	5.33845e-10	-0.740102	0.279	0.584	1.10981e-05	transforming growth factor beta receptor 3 [Source:HGNC Symbol	12	Oligodendrocytes
PDZRN3	5.11164e-10	-0.933062	0.225	0.515	1.06266e-05	PDZ domain containing ring finger 3 [Source:HGNC Symbol	12	Oligodendrocytes
ODC1	3.75181e-10	0.617651	0.884	0.74	7.79964e-06	ornithine decarboxylase 1 [Source:HGNC Symbol	12	Oligodendrocytes
LBH	3.6787e-10	-0.570653	0.178	0.491	7.64766e-06	LBH regulator of WNT signaling pathway [Source:HGNC Symbol	12	Oligodendrocytes
UBL3	3.05344e-10	-0.676408	0.473	0.749	6.3478e-06	ubiquitin like 3 [Source:HGNC Symbol	12	Oligodendrocytes
PAG1	3.01489e-10	-0.701063	0.341	0.665	6.26765e-06	phosphoprotein membrane anchor with glycosphingolipid microdomains 1 [Source:HGNC Symbol	12	Oligodendrocytes
ADAM12	2.68599e-10	-1.02604	0.264	0.578	5.58391e-06	ADAM metallopeptidase domain 12 [Source:HGNC Symbol	12	Oligodendrocytes
ATP6V0E1	2.63242e-10	0.696504	0.899	0.766	5.47254e-06	ATPase H+ transporting V0 subunit e1 [Source:HGNC Symbol	12	Oligodendrocytes
PHACTR1	2.63144e-10	-0.63366	0.256	0.587	5.47051e-06	phosphatase and actin regulator 1 [Source:HGNC Symbol	12	Oligodendrocytes
MTRNR2L2	2.40425e-10	-0.60291	0.155	0.47	4.9982e-06	MT-RNR2 like 2 [Source:HGNC Symbol	12	Oligodendrocytes
INSC	1.57251e-10	-0.479017	0.093	0.389	3.26909e-06	INSC spindle orientation adaptor protein [Source:HGNC Symbol	12	Oligodendrocytes
KIAA1755	1.48511e-10	-0.635315	0.093	0.383	3.08739e-06	KIAA1755 [Source:HGNC Symbol	12	Oligodendrocytes
FLRT3	1.30015e-10	-0.689648	0.357	0.689	2.70287e-06	fibronectin leucine rich transmembrane protein 3 [Source:HGNC Symbol	12	Oligodendrocytes
PLP1	1.29354e-10	-0.276284	0.612	0.889	2.68914e-06	proteolipid protein 1 [Source:HGNC Symbol	12	Oligodendrocytes
SLC15A3	1.27823e-10	-0.361636	0.109	0.401	2.65732e-06	solute carrier family 15 member 3 [Source:HGNC Symbol	12	Oligodendrocytes
TMSB4X	1.175e-10	0.976647	0.992	0.994	2.4427e-06	thymosin beta 4 X-linked [Source:HGNC Symbol	12	Oligodendrocytes
TNNT1	1.16601e-10	1.33798	0.248	0.06	2.42402e-06	troponin T1; slow skeletal type [Source:HGNC Symbol	12	Oligodendrocytes
SIX1	1.10191e-10	0.42348	0.155	0.003	2.29076e-06	SIX homeobox 1 [Source:HGNC Symbol	12	Oligodendrocytes
RPL41	1.07404e-10	0.348549	0.992	1	2.23281e-06	ribosomal protein L41 [Source:HGNC Symbol	12	Oligodendrocytes
SLC35F1	9.65862e-11	-0.770257	0.38	0.686	2.00793e-06	solute carrier family 35 member F1 [Source:HGNC Symbol	12	Oligodendrocytes
HOXA10	8.28614e-11	0.585894	0.411	0.129	1.72261e-06	homeobox A10 [Source:HGNC Symbol	12	Oligodendrocytes
NR4A2	8.21937e-11	-0.65996	0.295	0.629	1.70872e-06	nuclear receptor subfamily 4 group A member 2 [Source:HGNC Symbol	12	Oligodendrocytes
KRT8	6.72028e-11	0.676009	0.279	0.051	1.39708e-06	keratin 8 [Source:HGNC Symbol	12	Oligodendrocytes
CRABP2	5.1908e-11	0.782307	0.698	0.368	1.07912e-06	cellular retinoic acid binding protein 2 [Source:HGNC Symbol	12	Oligodendrocytes
TNIK	5.15092e-11	-0.914406	0.419	0.695	1.07083e-06	TRAF2 and NCK interacting kinase [Source:HGNC Symbol	12	Oligodendrocytes
LAPTM4A	4.2281e-11	0.739195	0.884	0.716	8.7898e-07	lysosomal protein transmembrane 4 alpha [Source:HGNC Symbol	12	Oligodendrocytes
NID2	2.63102e-11	-0.663537	0.14	0.458	5.46963e-07	nidogen 2 [Source:HGNC Symbol	12	Oligodendrocytes
ITGAV	2.53282e-11	-0.694293	0.302	0.641	5.26547e-07	integrin subunit alpha V [Source:HGNC Symbol	12	Oligodendrocytes
CNP	2.04911e-11	-0.684958	0.442	0.743	4.25989e-07	2';3'-cyclic nucleotide 3' phosphodiesterase [Source:HGNC Symbol	12	Oligodendrocytes
ANKRD28	1.85781e-11	-0.90139	0.357	0.647	3.8622e-07	ankyrin repeat domain 28 [Source:HGNC Symbol	12	Oligodendrocytes
LAMC1	1.75684e-11	-1.05948	0.605	0.817	3.65229e-07	laminin subunit gamma 1 [Source:HGNC Symbol	12	Oligodendrocytes
ATF3	1.70265e-11	-0.821263	0.581	0.838	3.53964e-07	activating transcription factor 3 [Source:HGNC Symbol	12	Oligodendrocytes
CDH2	1.41022e-11	-0.83441	0.558	0.796	2.9317e-07	cadherin 2 [Source:HGNC Symbol	12	Oligodendrocytes
PRSS23	1.25139e-11	-0.875411	0.279	0.614	2.60151e-07	serine protease 23 [Source:HGNC Symbol	12	Oligodendrocytes
COL19A1	1.06666e-11	-0.776444	0.155	0.488	2.21748e-07	collagen type XIX alpha 1 chain [Source:HGNC Symbol	12	Oligodendrocytes
BTF3	9.36711e-12	0.567483	0.961	0.892	1.94733e-07	basic transcription factor 3 [Source:HGNC Symbol	12	Oligodendrocytes
PVRL3	8.85502e-12	-0.790722	0.496	0.746	1.84087e-07	NA	12	Oligodendrocytes
LIX1	8.30005e-12	-1.02075	0.054	0.32	1.7255e-07	limb and CNS expressed 1 [Source:HGNC Symbol	12	Oligodendrocytes
EGFLAM	7.91866e-12	-0.504203	0.093	0.413	1.64621e-07	EGF like; fibronectin type III and laminin G domains [Source:HGNC Symbol	12	Oligodendrocytes
MAL	7.90611e-12	-1.01774	0.31	0.638	1.6436e-07	mal; T cell differentiation protein [Source:HGNC Symbol	12	Oligodendrocytes
WWTR1	6.78649e-12	-0.819571	0.62	0.82	1.41084e-07	WW domain containing transcription regulator 1 [Source:HGNC Symbol	12	Oligodendrocytes
KCTD12	5.8584e-12	-0.92591	0.279	0.605	1.2179e-07	potassium channel tetramerization domain containing 12 [Source:HGNC Symbol	12	Oligodendrocytes
TPM1	4.20226e-12	1.16046	0.636	0.29	8.73608e-08	tropomyosin 1 [Source:HGNC Symbol	12	Oligodendrocytes
LAMA4	4.12419e-12	-0.856921	0.248	0.542	8.57378e-08	laminin subunit alpha 4 [Source:HGNC Symbol	12	Oligodendrocytes
MMP17	3.99339e-12	-0.470967	0.186	0.542	8.30186e-08	matrix metallopeptidase 17 [Source:HGNC Symbol	12	Oligodendrocytes
FAM46A	3.30178e-12	-0.777056	0.302	0.638	6.86406e-08	NA	12	Oligodendrocytes
COL6A3	2.7863e-12	0.959128	0.264	0.03	5.79243e-08	collagen type VI alpha 3 chain [Source:HGNC Symbol	12	Oligodendrocytes
LAMB1	2.62679e-12	-1.00909	0.302	0.644	5.46084e-08	laminin subunit beta 1 [Source:HGNC Symbol	12	Oligodendrocytes
IGF2	2.37047e-12	1.479	0.279	0.054	4.92797e-08	insulin like growth factor 2 [Source:HGNC Symbol	12	Oligodendrocytes
PLK2	1.3562e-12	-0.880021	0.736	0.895	2.8194e-08	polo like kinase 2 [Source:HGNC Symbol	12	Oligodendrocytes
BST2	9.1509e-13	0.927525	0.248	0.036	1.90238e-08	bone marrow stromal cell antigen 2 [Source:HGNC Symbol	12	Oligodendrocytes
ERBB3	7.23124e-13	-0.756863	0.295	0.662	1.5033e-08	erb-b2 receptor tyrosine kinase 3 [Source:HGNC Symbol	12	Oligodendrocytes
PTN	6.36883e-13	-0.940132	0.457	0.781	1.32402e-08	pleiotrophin [Source:HGNC Symbol	12	Oligodendrocytes
GLIPR2	5.48659e-13	0.441098	0.388	0.099	1.14061e-08	GLI pathogenesis related 2 [Source:HGNC Symbol	12	Oligodendrocytes
GFRA1	5.20472e-13	-0.84881	0.287	0.647	1.08201e-08	GDNF family receptor alpha 1 [Source:HGNC Symbol	12	Oligodendrocytes
COL2A1	4.51027e-13	-0.776826	0.225	0.572	9.3764e-09	collagen type II alpha 1 chain [Source:HGNC Symbol	12	Oligodendrocytes
SP5	4.09356e-13	0.739746	0.264	0.036	8.51009e-09	Sp5 transcription factor [Source:HGNC Symbol	12	Oligodendrocytes
ETS1	2.97217e-13	-0.820108	0.403	0.74	6.17884e-09	ETS proto-oncogene 1; transcription factor [Source:HGNC Symbol	12	Oligodendrocytes
MARCKS	1.65738e-13	-0.728174	0.969	0.979	3.44552e-09	myristoylated alanine rich protein kinase C substrate [Source:HGNC Symbol	12	Oligodendrocytes
SOX10	1.59005e-13	-0.556211	0.38	0.763	3.30555e-09	SRY-box transcription factor 10 [Source:HGNC Symbol	12	Oligodendrocytes
RXRG	1.49639e-13	-0.789108	0.31	0.689	3.11083e-09	retinoid X receptor gamma [Source:HGNC Symbol	12	Oligodendrocytes
ARPC1B	1.36734e-13	-0.990141	0.628	0.835	2.84257e-09	actin related protein 2/3 complex subunit 1B [Source:HGNC Symbol	12	Oligodendrocytes
COL5A2	1.33049e-13	-1.01974	0.457	0.763	2.76596e-09	collagen type V alpha 2 chain [Source:HGNC Symbol	12	Oligodendrocytes
TCF4	1.10893e-13	0.94556	0.581	0.353	2.30536e-09	transcription factor 4 [Source:HGNC Symbol	12	Oligodendrocytes
NTM	1.09706e-13	-0.931929	0.31	0.686	2.28068e-09	neurotrimin [Source:HGNC Symbol	12	Oligodendrocytes
SASH1	6.31234e-14	-0.870654	0.411	0.749	1.31227e-09	SAM and SH3 domain containing 1 [Source:HGNC Symbol	12	Oligodendrocytes
BCHE	4.03706e-14	-0.844862	0.473	0.802	8.39264e-10	butyrylcholinesterase [Source:HGNC Symbol	12	Oligodendrocytes
EHD4	3.51581e-14	-0.906408	0.186	0.545	7.30902e-10	EH domain containing 4 [Source:HGNC Symbol	12	Oligodendrocytes
YBX3	5.26219e-15	0.882647	0.837	0.575	1.09396e-10	Y-box binding protein 3 [Source:HGNC Symbol	12	Oligodendrocytes
HES1	5.05611e-15	-1.05086	0.845	0.973	1.05112e-10	hes family bHLH transcription factor 1 [Source:HGNC Symbol	12	Oligodendrocytes
CXCL12	3.12519e-15	-0.858799	0.31	0.71	6.49697e-11	C-X-C motif chemokine ligand 12 [Source:HGNC Symbol	12	Oligodendrocytes
MEF2C	1.75541e-15	-0.872358	0.434	0.766	3.64933e-11	myocyte enhancer factor 2C [Source:HGNC Symbol	12	Oligodendrocytes
DLK1	1.65998e-15	1.60283	0.798	0.386	3.45092e-11	delta like non-canonical Notch ligand 1 [Source:HGNC Symbol	12	Oligodendrocytes
THY1	6.71933e-16	-0.739058	0.217	0.641	1.39688e-11	Thy-1 cell surface antigen [Source:HGNC Symbol	12	Oligodendrocytes
OLFML2A	2.29175e-16	-0.993367	0.326	0.751	4.76432e-12	olfactomedin like 2A [Source:HGNC Symbol	12	Oligodendrocytes
RN7SL1	9.38149e-17	-1.00736	0.271	0.665	1.95032e-12	RNA component of signal recognition particle 7SL1 [Source:HGNC Symbol	12	Oligodendrocytes
QKI	8.35424e-17	-0.864618	0.853	0.958	1.73676e-12	QKI; KH domain containing RNA binding [Source:HGNC Symbol	12	Oligodendrocytes
MMP2	6.25933e-17	-1.00279	0.504	0.832	1.30125e-12	matrix metallopeptidase 2 [Source:HGNC Symbol	12	Oligodendrocytes
TMBIM4,1	4.46561e-17	0.518021	0.667	0.234	9.28356e-13	NA	12	Oligodendrocytes
MEGF10	3.16293e-17	-1.0688	0.295	0.71	6.57542e-13	multiple EGF like domains 10 [Source:HGNC Symbol	12	Oligodendrocytes
SEMA3C	1.71943e-17	-0.906805	0.465	0.865	3.57453e-13	semaphorin 3C [Source:HGNC Symbol	12	Oligodendrocytes
AHR	1.52802e-17	-0.982168	0.364	0.778	3.17661e-13	aryl hydrocarbon receptor [Source:HGNC Symbol	12	Oligodendrocytes
GAS7	1.45127e-17	-0.911891	0.38	0.796	3.01705e-13	growth arrest specific 7 [Source:HGNC Symbol	12	Oligodendrocytes
POSTN	7.78764e-18	-1.54911	0.186	0.62	1.61897e-13	periostin [Source:HGNC Symbol	12	Oligodendrocytes
ITGA6	6.22027e-18	-1.14206	0.341	0.728	1.29313e-13	integrin subunit alpha 6 [Source:HGNC Symbol	12	Oligodendrocytes
SLITRK6	6.18647e-18	-1.17547	0.202	0.65	1.2861e-13	SLIT and NTRK like family member 6 [Source:HGNC Symbol	12	Oligodendrocytes
S100B	2.50854e-18	-1.27769	0.411	0.817	5.21501e-14	S100 calcium binding protein B [Source:HGNC Symbol	12	Oligodendrocytes
COL4A2	1.99323e-18	-1.2006	0.566	0.871	4.14373e-14	collagen type IV alpha 2 chain [Source:HGNC Symbol	12	Oligodendrocytes
MOXD1	1.29497e-18	-1.06551	0.271	0.707	2.69212e-14	monooxygenase DBH like 1 [Source:HGNC Symbol	12	Oligodendrocytes
MEST	1.19189e-18	1.21611	0.636	0.254	2.47782e-14	mesoderm specific transcript [Source:HGNC Symbol	12	Oligodendrocytes
COL4A1	1.46483e-19	-1.34293	0.45	0.811	3.04524e-15	collagen type IV alpha 1 chain [Source:HGNC Symbol	12	Oligodendrocytes
TAC1	6.67845e-20	-2.22465	0.054	0.44	1.38838e-15	tachykinin precursor 1 [Source:HGNC Symbol	12	Oligodendrocytes
TGFBR2	4.05463e-20	-1.40274	0.333	0.722	8.42917e-16	transforming growth factor beta receptor 2 [Source:HGNC Symbol	12	Oligodendrocytes
CDH6	1.85878e-20	-1.12541	0.287	0.757	3.86422e-16	cadherin 6 [Source:HGNC Symbol	12	Oligodendrocytes
DST	1.55454e-20	-1.50049	0.558	0.898	3.23173e-16	dystonin [Source:HGNC Symbol	12	Oligodendrocytes
LDHA	8.23833e-21	1.23601	0.752	0.332	1.71267e-16	lactate dehydrogenase A [Source:HGNC Symbol	12	Oligodendrocytes
ZEB2	3.23241e-21	-1.1256	0.682	0.943	6.71985e-17	zinc finger E-box binding homeobox 2 [Source:HGNC Symbol	12	Oligodendrocytes
SPTBN1	1.044e-21	-1.30921	0.682	0.928	2.17037e-17	spectrin beta; non-erythrocytic 1 [Source:HGNC Symbol	12	Oligodendrocytes
MPZ	6.2186e-22	-1.02325	0.202	0.701	1.29279e-17	myelin protein zero [Source:HGNC Symbol	12	Oligodendrocytes
CDH19	7.46361e-26	-1.50529	0.295	0.787	1.55161e-21	cadherin 19 [Source:HGNC Symbol	12	Oligodendrocytes
S100A6	8.81187e-27	-2.07776	0	0.428	1.8319e-22	S100 calcium binding protein A6 [Source:HGNC Symbol	12	Oligodendrocytes
PTPRZ1	2.904e-27	-1.59736	0.496	0.88	6.03713e-23	protein tyrosine phosphatase receptor type Z1 [Source:HGNC Symbol	12	Oligodendrocytes
FN1	1.10501e-27	-1.83446	0.519	0.916	2.29721e-23	fibronectin 1 [Source:HGNC Symbol	12	Oligodendrocytes
7SK,2	4.01495e-31	-2.69611	0.822	0.967	8.34667e-27	NA	12	Oligodendrocytes
ARID5B	2.23229e-06	-0.27308	0.114	0.263	0.0464071	AT-rich interaction domain 5B [Source:HGNC Symbol	11	Neuronal Precursors
HSPB1	2.21198e-06	-0.43238	0.597	0.712	0.0459849	heat shock protein family B (small) member 1 [Source:HGNC Symbol	11	Neuronal Precursors
AC011306,2	1.85277e-06	-0.271845	0.047	0.167	0.0385173	NA	11	Neuronal Precursors
CLIC1	1.83272e-06	-0.366857	0.735	0.751	0.0381005	chloride intracellular channel 1 [Source:HGNC Symbol	11	Neuronal Precursors
FGFBP3	1.58253e-06	0.503886	0.366	0.195	0.0328992	fibroblast growth factor binding protein 3 [Source:HGNC Symbol	11	Neuronal Precursors
TMSB15B	1.55552e-06	0.355994	0.46	0.271	0.0323377	thymosin beta 15B [Source:HGNC Symbol	11	Neuronal Precursors
TMSB15B	1.55552e-06	0.355994	0.46	0.271	0.0323377	thymosin beta 15B [Source:NCBI gene	11	Neuronal Precursors
RAPGEF5	1.50834e-06	0.298785	0.208	0.071	0.0313569	Rap guanine nucleotide exchange factor 5 [Source:HGNC Symbol	11	Neuronal Precursors
KDM5B	1.47743e-06	-0.365664	0.785	0.856	0.0307144	lysine demethylase 5B [Source:HGNC Symbol	11	Neuronal Precursors
GUK1	1.41989e-06	0.304178	0.876	0.749	0.0295181	guanylate kinase 1 [Source:HGNC Symbol	11	Neuronal Precursors
FNBP1L	1.39903e-06	-0.352793	0.668	0.74	0.0290844	formin binding protein 1 like [Source:HGNC Symbol	11	Neuronal Precursors
SMOC1	1.27542e-06	-0.428415	0.275	0.469	0.0265147	SPARC related modular calcium binding 1 [Source:HGNC Symbol	11	Neuronal Precursors
NCL	1.2711e-06	-0.264287	0.953	0.944	0.0264249	nucleolin [Source:HGNC Symbol	11	Neuronal Precursors
ARPP19	1.25839e-06	-0.256903	0.668	0.667	0.0261606	cAMP regulated phosphoprotein 19 [Source:HGNC Symbol	11	Neuronal Precursors
EEF1D	1.1812e-06	-0.350224	0.936	0.941	0.0245561	eukaryotic translation elongation factor 1 delta [Source:HGNC Symbol	11	Neuronal Precursors
IRX2	1.17878e-06	0.331918	0.587	0.384	0.0245057	iroquois homeobox 2 [Source:HGNC Symbol	11	Neuronal Precursors
GAPDH	1.16521e-06	-0.335753	1	1	0.0242235	glyceraldehyde-3-phosphate dehydrogenase [Source:HGNC Symbol	11	Neuronal Precursors
HNRNPK	9.03623e-07	-0.282685	0.963	0.958	0.0187854	heterogeneous nuclear ribonucleoprotein K [Source:HGNC Symbol	11	Neuronal Precursors
EIF4G2	8.53453e-07	-0.324816	0.909	0.915	0.0177424	eukaryotic translation initiation factor 4 gamma 2 [Source:HGNC Symbol	11	Neuronal Precursors
AP1S2	8.26963e-07	0.360377	0.678	0.492	0.0171917	adaptor related protein complex 1 subunit sigma 2 [Source:HGNC Symbol	11	Neuronal Precursors
CSRP2	8.16375e-07	-0.369247	0.664	0.726	0.0169716	cysteine and glycine rich protein 2 [Source:HGNC Symbol	11	Neuronal Precursors
QPRT	7.38901e-07	0.392344	0.688	0.542	0.015361	quinolinate phosphoribosyltransferase [Source:HGNC Symbol	11	Neuronal Precursors
COMMD3	6.81563e-07	-0.327959	0.275	0.429	0.014169	COMM domain containing 3 [Source:HGNC Symbol	11	Neuronal Precursors
JPX	5.71317e-07	0.322182	0.587	0.387	0.0118771	JPX transcript; XIST activator [Source:HGNC Symbol	11	Neuronal Precursors
SPAG9	5.45835e-07	-0.350599	0.772	0.802	0.0113474	sperm associated antigen 9 [Source:HGNC Symbol	11	Neuronal Precursors
NFIB	4.64985e-07	-0.328938	0.091	0.232	0.00966657	nuclear factor I B [Source:HGNC Symbol	11	Neuronal Precursors
FZD7	4.38878e-07	0.313956	0.339	0.164	0.00912384	frizzled class receptor 7 [Source:HGNC Symbol	11	Neuronal Precursors
RP11-169K16,9	3.04516e-07	-0.377071	0.336	0.489	0.00633058	NA	11	Neuronal Precursors
NMU	2.88649e-07	0.291405	0.473	0.268	0.00600073	neuromedin U [Source:HGNC Symbol	11	Neuronal Precursors
PDPN	2.7441e-07	0.391798	0.604	0.39	0.00570471	podoplanin [Source:HGNC Symbol	11	Neuronal Precursors
HOXB7	2.67789e-07	0.36532	0.292	0.124	0.00556706	homeobox B7 [Source:HGNC Symbol	11	Neuronal Precursors
NEUROD1	2.60959e-07	0.398083	0.312	0.136	0.00542507	neuronal differentiation 1 [Source:HGNC Symbol	11	Neuronal Precursors
UBE2L6	2.59631e-07	0.404768	0.732	0.54	0.00539747	ubiquitin conjugating enzyme E2 L6 [Source:HGNC Symbol	11	Neuronal Precursors
GCSH	2.48675e-07	0.301713	0.795	0.599	0.00516971	glycine cleavage system protein H [Source:HGNC Symbol	11	Neuronal Precursors
TIMP1	1.70109e-07	0.32089	0.426	0.223	0.0035364	TIMP metallopeptidase inhibitor 1 [Source:HGNC Symbol	11	Neuronal Precursors
SOX4	1.63064e-07	-0.413842	0.98	0.994	0.00338994	SRY-box transcription factor 4 [Source:HGNC Symbol	11	Neuronal Precursors
RTN3	1.53717e-07	-0.365663	0.852	0.895	0.00319561	reticulon 3 [Source:HGNC Symbol	11	Neuronal Precursors
BEX4	1.48483e-07	0.335073	0.896	0.808	0.00308681	brain expressed X-linked 4 [Source:HGNC Symbol	11	Neuronal Precursors
VSX1	1.29194e-07	0.570694	0.232	0.076	0.00268581	visual system homeobox 1 [Source:HGNC Symbol	11	Neuronal Precursors
ATP6V0E1	1.25605e-07	0.359951	0.862	0.692	0.0026112	ATPase H+ transporting V0 subunit e1 [Source:HGNC Symbol	11	Neuronal Precursors
RBBP4	1.11132e-07	-0.395648	0.685	0.754	0.00231032	RB binding protein 4; chromatin remodeling factor [Source:HGNC Symbol	11	Neuronal Precursors
BRD9	1.07814e-07	-0.320802	0.383	0.52	0.00224134	bromodomain containing 9 [Source:HGNC Symbol	11	Neuronal Precursors
TMEM123	1.04319e-07	-0.390283	0.473	0.582	0.00216868	transmembrane protein 123 [Source:HGNC Symbol	11	Neuronal Precursors
LGMN	9.10362e-08	0.282937	0.379	0.181	0.00189255	legumain [Source:HGNC Symbol	11	Neuronal Precursors
CBX3	8.5794e-08	-0.35994	0.826	0.864	0.00178357	chromobox 3 [Source:HGNC Symbol	11	Neuronal Precursors
AK4	7.35842e-08	-0.370427	0.174	0.353	0.00152974	adenylate kinase 4 [Source:HGNC Symbol	11	Neuronal Precursors
CLU	6.8227e-08	0.454215	0.52	0.308	0.00141837	clusterin [Source:HGNC Symbol	11	Neuronal Precursors
UBC	6.31613e-08	-0.372273	0.987	0.992	0.00131306	ubiquitin C [Source:HGNC Symbol	11	Neuronal Precursors
UCHL1	6.30511e-08	-0.366561	0.527	0.616	0.00131077	ubiquitin C-terminal hydrolase L1 [Source:HGNC Symbol	11	Neuronal Precursors
ELAVL4	6.25938e-08	0.453418	0.299	0.119	0.00130126	ELAV like RNA binding protein 4 [Source:HGNC Symbol	11	Neuronal Precursors
RAD21	5.75497e-08	-0.427546	0.631	0.664	0.0011964	RAD21 cohesin complex component [Source:HGNC Symbol	11	Neuronal Precursors
TMSB10	4.84443e-08	0.319462	0.997	0.986	0.00100711	thymosin beta 10 [Source:HGNC Symbol	11	Neuronal Precursors
ATP1B3	4.46572e-08	0.308809	0.768	0.554	0.000928378	ATPase Na+/K+ transporting subunit beta 3 [Source:HGNC Symbol	11	Neuronal Precursors
TH	4.46058e-08	-0.464903	0.017	0.13	0.00092731	tyrosine hydroxylase [Source:HGNC Symbol	11	Neuronal Precursors
PCSK1	4.29151e-08	-0.438226	0.064	0.22	0.000892162	proprotein convertase subtilisin/kexin type 1 [Source:HGNC Symbol	11	Neuronal Precursors
PCDHB2	3.71497e-08	0.26841	0.433	0.223	0.000772306	protocadherin beta 2 [Source:HGNC Symbol	11	Neuronal Precursors
EIF5	3.67031e-08	-0.356856	0.856	0.912	0.000763021	eukaryotic translation initiation factor 5 [Source:HGNC Symbol	11	Neuronal Precursors
HNRNPDL	3.08e-08	-0.325895	0.98	0.969	0.000640301	heterogeneous nuclear ribonucleoprotein D like [Source:HGNC Symbol	11	Neuronal Precursors
TCEAL2	2.84131e-08	-0.402096	0.124	0.291	0.000590681	transcription elongation factor A like 2 [Source:HGNC Symbol	11	Neuronal Precursors
TMEM38B	2.4579e-08	-0.547439	0.503	0.571	0.000510973	transmembrane protein 38B [Source:HGNC Symbol	11	Neuronal Precursors
DRAXIN	1.95994e-08	0.400489	0.862	0.692	0.000407451	dorsal inhibitory axon guidance protein [Source:HGNC Symbol	11	Neuronal Precursors
PRTG	1.68811e-08	0.398565	0.419	0.209	0.00035094	protogenin [Source:HGNC Symbol	11	Neuronal Precursors
TAL2	1.681e-08	-1.1204	0.128	0.297	0.000349463	TAL bHLH transcription factor 2 [Source:HGNC Symbol	11	Neuronal Precursors
CDK6	1.48846e-08	-0.43694	0.205	0.384	0.000309436	cyclin dependent kinase 6 [Source:HGNC Symbol	11	Neuronal Precursors
PPP1R14B	1.34728e-08	-0.449144	0.708	0.774	0.000280086	protein phosphatase 1 regulatory inhibitor subunit 14B [Source:HGNC Symbol	11	Neuronal Precursors
EZR	1.13039e-08	-0.428284	0.319	0.475	0.000234997	ezrin [Source:HGNC Symbol	11	Neuronal Precursors
HNRNPA2B1	1.11247e-08	-0.266403	0.983	0.96	0.000231272	heterogeneous nuclear ribonucleoprotein A2/B1 [Source:HGNC Symbol	11	Neuronal Precursors
CTSL	9.26651e-09	0.325224	0.359	0.161	0.000192641	cathepsin L [Source:HGNC Symbol	11	Neuronal Precursors
BTG1	8.73504e-09	-0.479898	0.977	0.989	0.000181593	BTG anti-proliferation factor 1 [Source:HGNC Symbol	11	Neuronal Precursors
C8orf46	7.86115e-09	0.327639	0.245	0.076	0.000163426	NA	11	Neuronal Precursors
HOXA6	7.05036e-09	0.264579	0.228	0.068	0.00014657	homeobox A6 [Source:HGNC Symbol	11	Neuronal Precursors
RPL27	6.99841e-09	0.288288	0.997	0.992	0.00014549	ribosomal protein L27 [Source:HGNC Symbol	11	Neuronal Precursors
ZFAND6	6.8274e-09	-0.37054	0.658	0.737	0.000141935	zinc finger AN1-type containing 6 [Source:HGNC Symbol	11	Neuronal Precursors
SH3BGRL	6.51211e-09	-0.398076	0.658	0.746	0.00013538	SH3 domain binding glutamate rich protein like [Source:HGNC Symbol	11	Neuronal Precursors
SLC16A14	4.63045e-09	0.27347	0.322	0.124	9.62623e-05	solute carrier family 16 member 14 [Source:HGNC Symbol	11	Neuronal Precursors
AES	4.35342e-09	-0.401857	0.557	0.681	9.05032e-05	NA	11	Neuronal Precursors
NPC2	4.18536e-09	0.407009	0.607	0.376	8.70095e-05	NPC intracellular cholesterol transporter 2 [Source:HGNC Symbol	11	Neuronal Precursors
JAG1	3.74554e-09	0.501048	0.678	0.444	7.78661e-05	jagged canonical Notch ligand 1 [Source:HGNC Symbol	11	Neuronal Precursors
SCUBE2	3.46123e-09	0.32816	0.309	0.113	7.19555e-05	signal peptide; CUB domain and EGF like domain containing 2 [Source:HGNC Symbol	11	Neuronal Precursors
RPS10	3.17385e-09	0.33357	0.98	0.955	6.59813e-05	ribosomal protein S10 [Source:HGNC Symbol	11	Neuronal Precursors
DCXR	2.90863e-09	0.425028	0.745	0.537	6.04675e-05	dicarbonyl and L-xylulose reductase [Source:HGNC Symbol	11	Neuronal Precursors
YBX1	2.78934e-09	-0.341975	0.997	0.992	5.79875e-05	Y-box binding protein 1 [Source:HGNC Symbol	11	Neuronal Precursors
RN7SL1	2.38028e-09	-0.468443	0.326	0.508	4.94837e-05	RNA component of signal recognition particle 7SL1 [Source:HGNC Symbol	11	Neuronal Precursors
VAMP2	1.86131e-09	0.384341	0.869	0.766	3.86947e-05	vesicle associated membrane protein 2 [Source:HGNC Symbol	11	Neuronal Precursors
ATP6V1H	1.37569e-09	0.363898	0.567	0.322	2.85993e-05	ATPase H+ transporting V1 subunit H [Source:HGNC Symbol	11	Neuronal Precursors
GPM6A	1.37119e-09	-0.479535	0.272	0.449	2.85057e-05	glycoprotein M6A [Source:HGNC Symbol	11	Neuronal Precursors
CBX1	1.36203e-09	-0.419096	0.752	0.799	2.83153e-05	chromobox 1 [Source:HGNC Symbol	11	Neuronal Precursors
MAB21L2	1.31568e-09	-0.393827	0.121	0.328	2.73518e-05	mab-21 like 2 [Source:HGNC Symbol	11	Neuronal Precursors
HN1	7.9125e-10	-0.366331	0.977	0.986	1.64493e-05	NA	11	Neuronal Precursors
PTPRZ1	6.80614e-10	-0.563786	0.463	0.593	1.41493e-05	protein tyrosine phosphatase receptor type Z1 [Source:HGNC Symbol	11	Neuronal Precursors
HOXD11	5.93959e-10	0.364753	0.235	0.062	1.23478e-05	homeobox D11 [Source:HGNC Symbol	11	Neuronal Precursors
NEUROD4	5.6283e-10	0.435258	0.701	0.449	1.17007e-05	neuronal differentiation 4 [Source:HGNC Symbol	11	Neuronal Precursors
HOXC-AS2	4.90093e-10	0.27989	0.235	0.059	1.01885e-05	HOXC cluster antisense RNA 2 [Source:HGNC Symbol	11	Neuronal Precursors
MDK	4.41362e-10	0.393752	0.983	0.924	9.17548e-06	midkine [Source:HGNC Symbol	11	Neuronal Precursors
SP9	4.28259e-10	0.371825	0.302	0.105	8.90307e-06	Sp9 transcription factor [Source:HGNC Symbol	11	Neuronal Precursors
DYNC1I2	3.29521e-10	-0.462802	0.826	0.887	6.85042e-06	dynein cytoplasmic 1 intermediate chain 2 [Source:HGNC Symbol	11	Neuronal Precursors
MT-CO3	2.93295e-10	0.568461	0.993	0.966	6.09732e-06	mitochondrially encoded cytochrome c oxidase III [Source:HGNC Symbol	11	Neuronal Precursors
BEX2	2.8377e-10	0.420731	0.836	0.619	5.8993e-06	brain expressed X-linked 2 [Source:HGNC Symbol	11	Neuronal Precursors
VCAN	2.43565e-10	0.392545	0.581	0.322	5.06348e-06	versican [Source:HGNC Symbol	11	Neuronal Precursors
NRG1	1.52476e-10	0.503057	0.416	0.178	3.16982e-06	neuregulin 1 [Source:HGNC Symbol	11	Neuronal Precursors
PRDX4	7.36714e-11	0.440435	0.782	0.588	1.53155e-06	peroxiredoxin 4 [Source:HGNC Symbol	11	Neuronal Precursors
TCF12	7.09253e-11	-0.501659	0.715	0.828	1.47447e-06	transcription factor 12 [Source:HGNC Symbol	11	Neuronal Precursors
ETS1	6.78918e-11	-0.30241	0.003	0.119	1.4114e-06	ETS proto-oncogene 1; transcription factor [Source:HGNC Symbol	11	Neuronal Precursors
TENM3	6.10641e-11	-0.590182	0.366	0.593	1.26946e-06	teneurin transmembrane protein 3 [Source:HGNC Symbol	11	Neuronal Precursors
GOPC	5.39471e-11	0.374904	0.557	0.294	1.12151e-06	golgi associated PDZ and coiled-coil motif containing [Source:HGNC Symbol	11	Neuronal Precursors
HOXA10	4.94967e-11	0.3727	0.406	0.167	1.02899e-06	homeobox A10 [Source:HGNC Symbol	11	Neuronal Precursors
USP11	4.22774e-11	0.370478	0.795	0.554	8.78905e-07	ubiquitin specific peptidase 11 [Source:HGNC Symbol	11	Neuronal Precursors
LMO1	4.06175e-11	-0.585127	0.215	0.469	8.44398e-07	LIM domain only 1 [Source:HGNC Symbol	11	Neuronal Precursors
RASL11B	3.5241e-11	0.572533	0.574	0.316	7.32625e-07	RAS like family 11 member B [Source:HGNC Symbol	11	Neuronal Precursors
CD99	3.34374e-11	0.430554	0.617	0.35	6.9513e-07	CD99 molecule (Xg blood group) [Source:HGNC Symbol	11	Neuronal Precursors
PPDPF	2.12468e-11	0.365744	0.97	0.938	4.41701e-07	pancreatic progenitor cell differentiation and proliferation factor [Source:HGNC Symbol	11	Neuronal Precursors
STK17A	1.83368e-11	0.500365	0.456	0.203	3.81204e-07	serine/threonine kinase 17a [Source:HGNC Symbol	11	Neuronal Precursors
RBMX2	1.58291e-11	0.340419	0.681	0.407	3.29071e-07	RNA binding motif protein X-linked 2 [Source:HGNC Symbol	11	Neuronal Precursors
MT-ND1	1.54318e-11	0.680943	0.946	0.893	3.20813e-07	mitochondrially encoded NADH:ubiquinone oxidoreductase core subunit 1 [Source:HGNC Symbol	11	Neuronal Precursors
CEBPZ-AS1	1.35439e-11	0.300423	0.268	0.068	2.81563e-07	NA	11	Neuronal Precursors
GYPC	1.20058e-11	0.501853	0.789	0.537	2.4959e-07	glycophorin C (Gerbich blood group) [Source:HGNC Symbol	11	Neuronal Precursors
FSIP2	1.104e-11	0.355949	0.275	0.076	2.2951e-07	fibrous sheath interacting protein 2 [Source:HGNC Symbol	11	Neuronal Precursors
TLE4	7.5454e-12	-0.549261	0.809	0.859	1.56861e-07	TLE family member 4; transcriptional corepressor [Source:HGNC Symbol	11	Neuronal Precursors
MUM1	6.62084e-12	-0.544762	0.349	0.531	1.37641e-07	NA	11	Neuronal Precursors
MARCKS	4.63962e-12	-0.374932	0.997	1	9.64531e-08	myristoylated alanine rich protein kinase C substrate [Source:HGNC Symbol	11	Neuronal Precursors
RPL17	3.64596e-12	0.463047	0.832	0.661	7.57959e-08	ribosomal protein L17 [Source:HGNC Symbol	11	Neuronal Precursors
MORF4L2	3.27497e-12	0.425177	0.946	0.839	6.80833e-08	mortality factor 4 like 2 [Source:HGNC Symbol	11	Neuronal Precursors
NGFR	1.14929e-12	0.458254	0.453	0.186	2.38926e-08	nerve growth factor receptor [Source:HGNC Symbol	11	Neuronal Precursors
RPL39L	1.09709e-12	0.312609	0.282	0.073	2.28075e-08	ribosomal protein L39 like [Source:HGNC Symbol	11	Neuronal Precursors
RABAC1	7.8476e-13	0.439782	0.926	0.828	1.63144e-08	Rab acceptor 1 [Source:HGNC Symbol	11	Neuronal Precursors
NEAT1	5.42361e-13	0.788616	0.755	0.531	1.12751e-08	nuclear paraspeckle assembly transcript 1 [Source:HGNC Symbol	11	Neuronal Precursors
ZNF280D	5.3421e-13	-0.43094	0.074	0.285	1.11057e-08	zinc finger protein 280D [Source:HGNC Symbol	11	Neuronal Precursors
ATP6AP2	5.30962e-13	0.47956	0.819	0.596	1.10382e-08	ATPase H+ transporting accessory protein 2 [Source:HGNC Symbol	11	Neuronal Precursors
PHLDA1	4.68065e-13	0.556481	0.678	0.39	9.73059e-09	pleckstrin homology like domain family A member 1 [Source:HGNC Symbol	11	Neuronal Precursors
HOXA7	1.57722e-13	0.491276	0.393	0.136	3.27888e-09	homeobox A7 [Source:HGNC Symbol	11	Neuronal Precursors
PNRC1	9.2736e-14	-0.534666	0.842	0.887	1.92789e-09	proline rich nuclear receptor coactivator 1 [Source:HGNC Symbol	11	Neuronal Precursors
NUDT16	4.81813e-14	0.353006	0.403	0.136	1.00164e-09	nudix hydrolase 16 [Source:HGNC Symbol	11	Neuronal Precursors
RPL3	3.05029e-14	0.305041	1	1	6.34124e-10	ribosomal protein L3 [Source:HGNC Symbol	11	Neuronal Precursors
OTX2	2.68545e-14	-0.664876	0.168	0.441	5.58279e-10	orthodenticle homeobox 2 [Source:HGNC Symbol	11	Neuronal Precursors
LINC00473	1.13123e-14	0.511023	0.413	0.141	2.35172e-10	NA	11	Neuronal Precursors
DUSP15	1.08129e-14	0.370406	0.332	0.085	2.24788e-10	dual specificity phosphatase 15 [Source:HGNC Symbol	11	Neuronal Precursors
SNHG8	7.73287e-15	0.570986	0.852	0.602	1.60759e-10	small nucleolar RNA host gene 8 [Source:HGNC Symbol	11	Neuronal Precursors
TMEM47	6.59482e-15	0.589422	0.628	0.356	1.371e-10	transmembrane protein 47 [Source:HGNC Symbol	11	Neuronal Precursors
MAB21L1	1.94387e-15	-0.780757	0.094	0.328	4.04111e-11	mab-21 like 1 [Source:HGNC Symbol	11	Neuronal Precursors
RPS18	1.75024e-15	0.372256	1	1	3.63857e-11	ribosomal protein S18 [Source:HGNC Symbol	11	Neuronal Precursors
GDF15	1.27476e-15	0.600954	0.305	0.068	2.65009e-11	growth differentiation factor 15 [Source:HGNC Symbol	11	Neuronal Precursors
EIF1AX	1.2182e-15	0.483683	0.953	0.805	2.53252e-11	eukaryotic translation initiation factor 1A X-linked [Source:HGNC Symbol	11	Neuronal Precursors
CRABP2	5.20363e-16	0.552824	0.715	0.393	1.08178e-11	cellular retinoic acid binding protein 2 [Source:HGNC Symbol	11	Neuronal Precursors
PPP1R14C	3.99199e-16	0.399964	0.547	0.243	8.29894e-12	protein phosphatase 1 regulatory inhibitor subunit 14C [Source:HGNC Symbol	11	Neuronal Precursors
HOXC9	3.61458e-16	0.430436	0.376	0.102	7.51435e-12	homeobox C9 [Source:HGNC Symbol	11	Neuronal Precursors
ZNF626	1.64123e-16	0.269429	0.164	0.003	3.41194e-12	zinc finger protein 626 [Source:HGNC Symbol	11	Neuronal Precursors
ODC1	3.81088e-17	0.533095	0.983	0.938	7.92245e-13	ornithine decarboxylase 1 [Source:HGNC Symbol	11	Neuronal Precursors
C1orf54	3.21552e-17	0.671366	0.715	0.472	6.68474e-13	chromosome 1 open reading frame 54 [Source:HGNC Symbol	11	Neuronal Precursors
GPC3	1.03461e-17	0.715792	0.446	0.144	2.15086e-13	glypican 3 [Source:HGNC Symbol	11	Neuronal Precursors
LINC01158	8.49216e-18	-0.840765	0.631	0.78	1.76543e-13	NA	11	Neuronal Precursors
PCLO	3.62617e-18	0.576437	0.52	0.192	7.53844e-14	piccolo presynaptic cytomatrix protein [Source:HGNC Symbol	11	Neuronal Precursors
TMBIM4,1	2.82164e-18	0.386259	0.456	0.144	5.8659e-14	NA	11	Neuronal Precursors
HOXA9	8.31039e-19	0.576502	0.53	0.192	1.72765e-14	homeobox A9 [Source:HGNC Symbol	11	Neuronal Precursors
MEIS2	6.97801e-19	-0.887098	0.554	0.788	1.45066e-14	Meis homeobox 2 [Source:HGNC Symbol	11	Neuronal Precursors
PRDX6	3.16716e-19	0.63159	0.903	0.802	6.5842e-15	peroxiredoxin 6 [Source:HGNC Symbol	11	Neuronal Precursors
SLC44A2	6.24803e-20	0.541679	0.624	0.274	1.2989e-15	solute carrier family 44 member 2 [Source:HGNC Symbol	11	Neuronal Precursors
PEG10	6.77078e-21	-1.61151	0.701	0.831	1.40758e-16	paternally expressed 10 [Source:HGNC Symbol	11	Neuronal Precursors
NGFRAP1	4.91568e-23	0.513044	0.987	0.975	1.02192e-18	NA	11	Neuronal Precursors
SNCG	1.22443e-23	0.939587	0.567	0.192	2.54547e-19	synuclein gamma [Source:HGNC Symbol	11	Neuronal Precursors
HMGB2	1.46053e-24	0.844762	0.893	0.661	3.03629e-20	high mobility group box 2 [Source:HGNC Symbol	11	Neuronal Precursors
BTF3	1.17533e-24	0.547772	0.993	0.96	2.4434e-20	basic transcription factor 3 [Source:HGNC Symbol	11	Neuronal Precursors
SLC25A6	4.24706e-25	0.600898	0.98	0.912	8.82921e-21	solute carrier family 25 member 6 [Source:HGNC Symbol	11	Neuronal Precursors
CHCHD2	2.05399e-26	-0.65097	0.859	0.941	4.27003e-22	coiled-coil-helix-coiled-coil-helix domain containing 2 [Source:HGNC Symbol	11	Neuronal Precursors
TMSB4X	1.53307e-26	1.07497	0.997	0.983	3.18709e-22	thymosin beta 4 X-linked [Source:HGNC Symbol	11	Neuronal Precursors
RPS6	2.93565e-27	0.457811	1	1	6.10293e-23	ribosomal protein S6 [Source:HGNC Symbol	11	Neuronal Precursors
7SK,2	1.38332e-65	-2.14339	0.886	0.963	2.87578e-61	NA	11	Neuronal Precursors
RABAC1	2.3987e-06	0.250771	0.944	0.916	0.0498667	Rab acceptor 1 [Source:HGNC Symbol	10	Radial Glia
CD81	2.07925e-06	-0.269458	0.911	0.97	0.0432255	CD81 molecule [Source:HGNC Symbol	10	Radial Glia
NPPC	1.81708e-06	0.390076	0.474	0.293	0.0377754	natriuretic peptide C [Source:HGNC Symbol	10	Radial Glia
BTG1	1.6514e-06	-0.314623	0.944	0.98	0.034331	BTG anti-proliferation factor 1 [Source:HGNC Symbol	10	Radial Glia
CDK6	1.58075e-06	-0.264383	0.26	0.343	0.0328623	cyclin dependent kinase 6 [Source:HGNC Symbol	10	Radial Glia
KLHL23	1.56834e-06	-0.253737	0.694	0.724	0.0326043	kelch like family member 23 [Source:HGNC Symbol	10	Radial Glia
EIF5	1.55952e-06	-0.304696	0.959	0.976	0.032421	eukaryotic translation initiation factor 5 [Source:HGNC Symbol	10	Radial Glia
SLC2A4RG	1.31333e-06	0.287845	0.663	0.512	0.0273028	SLC2A4 regulator [Source:HGNC Symbol	10	Radial Glia
RASAL2	1.24354e-06	-0.297183	0.344	0.512	0.0258519	RAS protein activator like 2 [Source:HGNC Symbol	10	Radial Glia
UBE2E1	1.23718e-06	-0.266131	0.426	0.576	0.0257198	ubiquitin conjugating enzyme E2 E1 [Source:HGNC Symbol	10	Radial Glia
GOPC	1.12327e-06	0.253031	0.559	0.36	0.0233517	golgi associated PDZ and coiled-coil motif containing [Source:HGNC Symbol	10	Radial Glia
MAGED1	1.11087e-06	0.335541	0.737	0.596	0.0230938	MAGE family member D1 [Source:HGNC Symbol	10	Radial Glia
RAD21	1.0307e-06	-0.347753	0.898	0.936	0.0214271	RAD21 cohesin complex component [Source:HGNC Symbol	10	Radial Glia
CITED2	9.12117e-07	-0.297565	0.551	0.657	0.018962	Cbp/p300 interacting transactivator with Glu/Asp rich carboxy-terminal domain 2 [Source:HGNC Symbol	10	Radial Glia
MRPL3	8.98534e-07	0.286704	0.809	0.663	0.0186796	mitochondrial ribosomal protein L3 [Source:HGNC Symbol	10	Radial Glia
AKAP12	8.04798e-07	-0.286727	0.321	0.444	0.0167309	A-kinase anchoring protein 12 [Source:HGNC Symbol	10	Radial Glia
TFPI2	7.76293e-07	0.333225	0.329	0.155	0.0161384	tissue factor pathway inhibitor 2 [Source:HGNC Symbol	10	Radial Glia
EHBP1	6.03447e-07	-0.277059	0.219	0.37	0.0125451	EH domain binding protein 1 [Source:HGNC Symbol	10	Radial Glia
NPC2	5.45175e-07	0.325707	0.724	0.606	0.0113337	NPC intracellular cholesterol transporter 2 [Source:HGNC Symbol	10	Radial Glia
MFAP2	4.67017e-07	-0.280246	0.375	0.552	0.00970882	microfibril associated protein 2 [Source:HGNC Symbol	10	Radial Glia
MT-CO2	4.44017e-07	0.336828	0.99	0.983	0.00923066	mitochondrially encoded cytochrome c oxidase II [Source:HGNC Symbol	10	Radial Glia
AK4	4.36767e-07	-0.275537	0.253	0.431	0.00907994	adenylate kinase 4 [Source:HGNC Symbol	10	Radial Glia
SMS	4.09536e-07	0.277229	0.918	0.808	0.00851385	spermine synthase [Source:HGNC Symbol	10	Radial Glia
ARL4C	3.82933e-07	0.34754	0.867	0.761	0.0079608	ADP ribosylation factor like GTPase 4C [Source:HGNC Symbol	10	Radial Glia
MT-ND4	3.70468e-07	0.286654	0.99	0.98	0.00770166	mitochondrially encoded NADH:ubiquinone oxidoreductase core subunit 4 [Source:HGNC Symbol	10	Radial Glia
PTGR1	3.63738e-07	0.275127	0.645	0.441	0.00756175	prostaglandin reductase 1 [Source:HGNC Symbol	10	Radial Glia
AIFM1	3.5615e-07	0.27635	0.503	0.323	0.00740401	apoptosis inducing factor mitochondria associated 1 [Source:HGNC Symbol	10	Radial Glia
PCLO	3.38054e-07	0.262406	0.411	0.219	0.00702781	piccolo presynaptic cytomatrix protein [Source:HGNC Symbol	10	Radial Glia
TFDP2	3.13384e-07	-0.327245	0.702	0.714	0.00651495	transcription factor Dp-2 [Source:HGNC Symbol	10	Radial Glia
NENF	3.06033e-07	0.303509	0.684	0.498	0.00636213	neudesin neurotrophic factor [Source:HGNC Symbol	10	Radial Glia
TMSB15A	3.04421e-07	-0.272168	0.99	0.99	0.0063286	thymosin beta 15a [Source:HGNC Symbol	10	Radial Glia
SNHG8	2.9001e-07	0.333459	0.76	0.586	0.00602901	small nucleolar RNA host gene 8 [Source:HGNC Symbol	10	Radial Glia
CLU	2.15011e-07	0.375492	0.747	0.576	0.00446986	clusterin [Source:HGNC Symbol	10	Radial Glia
RBMX2	2.08236e-07	0.313863	0.679	0.485	0.00432902	RNA binding motif protein X-linked 2 [Source:HGNC Symbol	10	Radial Glia
DDX1	2.03013e-07	-0.274987	0.668	0.737	0.00422044	DEAD-box helicase 1 [Source:HGNC Symbol	10	Radial Glia
RBMX	1.50663e-07	-0.273232	0.982	1	0.00313214	RNA binding motif protein X-linked [Source:HGNC Symbol	10	Radial Glia
HNRNPAB	1.46837e-07	-0.328895	0.954	0.966	0.0030526	heterogeneous nuclear ribonucleoprotein A/B [Source:HGNC Symbol	10	Radial Glia
CCND1	1.26506e-07	-0.44587	0.776	0.842	0.00262992	cyclin D1 [Source:HGNC Symbol	10	Radial Glia
EIF3J	1.13251e-07	-0.323825	0.781	0.875	0.00235438	eukaryotic translation initiation factor 3 subunit J [Source:HGNC Symbol	10	Radial Glia
AES	8.40851e-08	-0.336947	0.607	0.697	0.00174804	NA	10	Radial Glia
MATR3	6.2238e-08	-0.310526	0.934	0.96	0.00129387	matrin 3 [Source:NCBI gene	10	Radial Glia
MATR3	6.2238e-08	-0.310526	0.934	0.96	0.00129387	matrin 3 [Source:HGNC Symbol	10	Radial Glia
PLIN2	5.00383e-08	0.314862	0.548	0.337	0.00104025	perilipin 2 [Source:HGNC Symbol	10	Radial Glia
RGS2	4.87247e-08	-0.341449	0.309	0.414	0.00101294	regulator of G protein signaling 2 [Source:HGNC Symbol	10	Radial Glia
PRPS1	4.66231e-08	0.251814	0.61	0.387	0.000969248	phosphoribosyl pyrophosphate synthetase 1 [Source:HGNC Symbol	10	Radial Glia
DEK	3.40906e-08	-0.317785	0.969	0.993	0.000708709	DEK proto-oncogene [Source:HGNC Symbol	10	Radial Glia
MSI2	3.39479e-08	-0.339863	0.446	0.542	0.000705744	musashi RNA binding protein 2 [Source:HGNC Symbol	10	Radial Glia
TCEAL8	2.88261e-08	0.32743	0.763	0.603	0.000599266	transcription elongation factor A like 8 [Source:HGNC Symbol	10	Radial Glia
CD99	1.82574e-08	0.366713	0.849	0.737	0.000379553	CD99 molecule (Xg blood group) [Source:HGNC Symbol	10	Radial Glia
MARCKS	1.66399e-08	-0.320488	1	1	0.000345927	myristoylated alanine rich protein kinase C substrate [Source:HGNC Symbol	10	Radial Glia
GUK1	1.5854e-08	0.314174	0.911	0.798	0.000329589	guanylate kinase 1 [Source:HGNC Symbol	10	Radial Glia
LGALS1	1.42928e-08	0.480631	0.684	0.475	0.000297133	galectin 1 [Source:HGNC Symbol	10	Radial Glia
YWHAE	1.06273e-08	-0.255548	0.995	0.997	0.000220932	tyrosine 3-monooxygenase/tryptophan 5-monooxygenase activation protein epsilon [Source:HGNC Symbol	10	Radial Glia
TIMP2	1.02277e-08	-0.251413	0.128	0.29	0.000212623	TIMP metallopeptidase inhibitor 2 [Source:HGNC Symbol	10	Radial Glia
CTSL	9.74149e-09	0.3495	0.52	0.306	0.000202516	cathepsin L [Source:HGNC Symbol	10	Radial Glia
FSCN1	7.78989e-09	-0.349183	0.722	0.855	0.000161944	fascin actin-bundling protein 1 [Source:HGNC Symbol	10	Radial Glia
RBBP7	7.27154e-09	0.33109	0.888	0.805	0.000151168	RB binding protein 7; chromatin remodeling factor [Source:HGNC Symbol	10	Radial Glia
TCF12	5.67319e-09	-0.370414	0.564	0.67	0.00011794	transcription factor 12 [Source:HGNC Symbol	10	Radial Glia
FZD7	5.43629e-09	0.253178	0.398	0.185	0.000113015	frizzled class receptor 7 [Source:HGNC Symbol	10	Radial Glia
BEX4	5.1585e-09	0.349934	0.875	0.781	0.00010724	brain expressed X-linked 4 [Source:HGNC Symbol	10	Radial Glia
HMGB2	4.83556e-09	0.396304	0.997	0.99	0.000100526	high mobility group box 2 [Source:HGNC Symbol	10	Radial Glia
HNRNPA2B1	4.69392e-09	-0.251553	1	1	9.75818e-05	heterogeneous nuclear ribonucleoprotein A2/B1 [Source:HGNC Symbol	10	Radial Glia
NUDT16	3.4024e-09	0.304502	0.492	0.279	7.07326e-05	nudix hydrolase 16 [Source:HGNC Symbol	10	Radial Glia
CA14	2.9374e-09	0.405315	0.704	0.525	6.10656e-05	carbonic anhydrase 14 [Source:HGNC Symbol	10	Radial Glia
HES1	2.71374e-09	-0.44534	0.393	0.576	5.6416e-05	hes family bHLH transcription factor 1 [Source:HGNC Symbol	10	Radial Glia
RPL17	2.67521e-09	0.333148	0.844	0.751	5.56149e-05	ribosomal protein L17 [Source:HGNC Symbol	10	Radial Glia
ATP5I	2.62612e-09	-0.295758	0.941	0.976	5.45944e-05	NA	10	Radial Glia
H2AFJ	2.05631e-09	0.276457	0.375	0.162	4.27486e-05	H2A histone family member J [Source:HGNC Symbol	10	Radial Glia
HNRNPDL	2.0051e-09	-0.276811	0.992	0.997	4.1684e-05	heterogeneous nuclear ribonucleoprotein D like [Source:HGNC Symbol	10	Radial Glia
HSPB1	1.93625e-09	-0.407142	0.88	0.946	4.02528e-05	heat shock protein family B (small) member 1 [Source:HGNC Symbol	10	Radial Glia
NRG1	1.76189e-09	0.331515	0.51	0.273	3.6628e-05	neuregulin 1 [Source:HGNC Symbol	10	Radial Glia
JPX	1.26369e-09	0.307114	0.661	0.421	2.62708e-05	JPX transcript; XIST activator [Source:HGNC Symbol	10	Radial Glia
CMC1	1.21499e-09	0.317876	0.574	0.343	2.52585e-05	C-X9-C motif containing 1 [Source:HGNC Symbol	10	Radial Glia
MAB21L2	1.02189e-09	-0.353175	0.128	0.33	2.12441e-05	mab-21 like 2 [Source:HGNC Symbol	10	Radial Glia
HOXA9	9.93741e-10	0.330041	0.426	0.202	2.06589e-05	homeobox A9 [Source:HGNC Symbol	10	Radial Glia
COMMD3	6.15968e-10	-0.314714	0.286	0.458	1.28053e-05	COMM domain containing 3 [Source:HGNC Symbol	10	Radial Glia
DNAJA1	5.65532e-10	-0.294266	0.987	0.997	1.17568e-05	DnaJ heat shock protein family (Hsp40) member A1 [Source:HGNC Symbol	10	Radial Glia
GAPDH	5.02744e-10	-0.362974	0.997	1	1.04516e-05	glyceraldehyde-3-phosphate dehydrogenase [Source:HGNC Symbol	10	Radial Glia
PHYHIPL	3.13823e-10	-0.301682	0.168	0.33	6.52406e-06	phytanoyl-CoA 2-hydroxylase interacting protein like [Source:HGNC Symbol	10	Radial Glia
RPL22L1	2.76163e-10	0.357081	0.949	0.956	5.74116e-06	ribosomal protein L22 like 1 [Source:HGNC Symbol	10	Radial Glia
SET	2.42425e-10	-0.309757	1	0.997	5.03978e-06	SET nuclear proto-oncogene [Source:HGNC Symbol	10	Radial Glia
JUN	2.17127e-10	0.589523	0.865	0.737	4.51386e-06	Jun proto-oncogene; AP-1 transcription factor subunit [Source:HGNC Symbol	10	Radial Glia
CBX1	1.6665e-10	-0.367741	0.908	0.953	3.46449e-06	chromobox 1 [Source:HGNC Symbol	10	Radial Glia
EEF1D	1.58229e-10	-0.293281	0.987	1	3.28943e-06	eukaryotic translation elongation factor 1 delta [Source:HGNC Symbol	10	Radial Glia
PPP1R14B	1.53379e-10	-0.360923	0.883	0.953	3.1886e-06	protein phosphatase 1 regulatory inhibitor subunit 14B [Source:HGNC Symbol	10	Radial Glia
TXNIP	1.49983e-10	0.442426	0.551	0.313	3.11799e-06	thioredoxin interacting protein [Source:HGNC Symbol	10	Radial Glia
EIF2S3	7.63814e-11	0.371152	0.832	0.657	1.58789e-06	eukaryotic translation initiation factor 2 subunit gamma [Source:HGNC Symbol	10	Radial Glia
RAN	7.11469e-11	-0.255009	1	1	1.47907e-06	RAN; member RAS oncogene family [Source:HGNC Symbol	10	Radial Glia
ZNF682	4.3771e-11	0.257592	0.319	0.104	9.09955e-07	zinc finger protein 682 [Source:HGNC Symbol	10	Radial Glia
HOXA7	3.19624e-11	0.29579	0.36	0.131	6.64467e-07	homeobox A7 [Source:HGNC Symbol	10	Radial Glia
ANXA2	2.96902e-11	0.316294	0.413	0.172	6.17229e-07	annexin A2 [Source:HGNC Symbol	10	Radial Glia
GYPC	2.95887e-11	0.5159	0.921	0.832	6.15119e-07	glycophorin C (Gerbich blood group) [Source:HGNC Symbol	10	Radial Glia
SAT1	2.07768e-11	0.436534	0.694	0.451	4.31928e-07	spermidine/spermine N1-acetyltransferase 1 [Source:HGNC Symbol	10	Radial Glia
ATP6AP2	1.3386e-11	0.390778	0.847	0.663	2.78281e-07	ATPase H+ transporting accessory protein 2 [Source:HGNC Symbol	10	Radial Glia
RN7SL1	1.0418e-11	-0.550851	0.263	0.451	2.16579e-07	RNA component of signal recognition particle 7SL1 [Source:HGNC Symbol	10	Radial Glia
DCXR	1.02744e-11	0.395588	0.957	0.889	2.13594e-07	dicarbonyl and L-xylulose reductase [Source:HGNC Symbol	10	Radial Glia
EIF1AX	9.38709e-12	0.368114	0.992	0.966	1.95148e-07	eukaryotic translation initiation factor 1A X-linked [Source:HGNC Symbol	10	Radial Glia
LINC00461	6.40968e-12	-0.511883	0.579	0.764	1.33251e-07	long intergenic non-protein coding RNA 461 [Source:HGNC Symbol	10	Radial Glia
RPS10	4.60244e-12	0.265682	0.992	1	9.56801e-08	ribosomal protein S10 [Source:HGNC Symbol	10	Radial Glia
PCSK1	4.14689e-12	-0.391451	0.059	0.236	8.62097e-08	proprotein convertase subtilisin/kexin type 1 [Source:HGNC Symbol	10	Radial Glia
SCUBE2	2.68643e-12	0.510753	0.49	0.232	5.58482e-08	signal peptide; CUB domain and EGF like domain containing 2 [Source:HGNC Symbol	10	Radial Glia
DLK1	2.67147e-12	1.02043	0.952	0.872	5.55372e-08	delta like non-canonical Notch ligand 1 [Source:HGNC Symbol	10	Radial Glia
LDHA	2.46508e-12	0.532791	0.747	0.505	5.12465e-08	lactate dehydrogenase A [Source:HGNC Symbol	10	Radial Glia
PGM5	2.08334e-12	-0.32799	0.041	0.202	4.33106e-08	phosphoglucomutase 5 [Source:HGNC Symbol	10	Radial Glia
SNCG	1.16956e-12	0.343696	0.357	0.118	2.4314e-08	synuclein gamma [Source:HGNC Symbol	10	Radial Glia
STMN1	6.39569e-13	-0.391067	1	1	1.3296e-08	stathmin 1 [Source:HGNC Symbol	10	Radial Glia
CLEC11A	4.06275e-13	0.299803	0.276	0.067	8.44606e-09	C-type lectin domain containing 11A [Source:HGNC Symbol	10	Radial Glia
PEG10	4.06139e-13	-0.78392	0.878	0.949	8.44322e-09	paternally expressed 10 [Source:HGNC Symbol	10	Radial Glia
CEBPZ-AS1	3.94455e-13	0.267409	0.296	0.074	8.20033e-09	NA	10	Radial Glia
MT-ND1	3.87606e-13	0.456299	0.967	0.97	8.05795e-09	mitochondrially encoded NADH:ubiquinone oxidoreductase core subunit 1 [Source:HGNC Symbol	10	Radial Glia
MAB21L1	3.40794e-13	-0.472516	0.092	0.306	7.08478e-09	mab-21 like 1 [Source:HGNC Symbol	10	Radial Glia
HSP90AB1	1.78444e-13	-0.315093	0.995	1	3.70967e-09	heat shock protein 90 alpha family class B member 1 [Source:HGNC Symbol	10	Radial Glia
SLC44A2	1.60272e-13	0.431613	0.582	0.316	3.3319e-09	solute carrier family 44 member 2 [Source:HGNC Symbol	10	Radial Glia
PGM5-AS1	1.12394e-13	-0.479587	0.036	0.215	2.33656e-09	PGM5 antisense RNA 1 [Source:HGNC Symbol	10	Radial Glia
OTX2	9.5662e-14	-0.421448	0.102	0.333	1.98872e-09	orthodenticle homeobox 2 [Source:HGNC Symbol	10	Radial Glia
NEAT1	8.42806e-14	0.551235	0.661	0.401	1.75211e-09	nuclear paraspeckle assembly transcript 1 [Source:HGNC Symbol	10	Radial Glia
MAGED2	6.03397e-14	0.393133	0.969	0.929	1.2544e-09	MAGE family member D2 [Source:HGNC Symbol	10	Radial Glia
RARRES2	3.97674e-14	0.517057	0.796	0.552	8.26725e-10	retinoic acid receptor responder 2 [Source:HGNC Symbol	10	Radial Glia
CHCHD5	2.98458e-14	0.460205	0.783	0.596	6.20465e-10	coiled-coil-helix-coiled-coil-helix domain containing 5 [Source:HGNC Symbol	10	Radial Glia
FTH1	1.96149e-14	-0.31737	0.997	1	4.07775e-10	ferritin heavy chain 1 [Source:HGNC Symbol	10	Radial Glia
DUSP15	1.43312e-14	0.337263	0.347	0.108	2.97932e-10	dual specificity phosphatase 15 [Source:HGNC Symbol	10	Radial Glia
FGFBP3	1.39593e-14	0.654601	0.714	0.428	2.90201e-10	fibroblast growth factor binding protein 3 [Source:HGNC Symbol	10	Radial Glia
CKB	4.90802e-15	-0.454786	0.997	1	1.02033e-10	creatine kinase B [Source:HGNC Symbol	10	Radial Glia
RUNX1T1	3.43446e-15	-0.478535	0.112	0.37	7.13989e-11	RUNX1 partner transcriptional co-repressor 1 [Source:HGNC Symbol	10	Radial Glia
MT-CO3	2.34402e-15	0.534051	0.995	0.983	4.87298e-11	mitochondrially encoded cytochrome c oxidase III [Source:HGNC Symbol	10	Radial Glia
TMSB4X	1.03911e-15	0.51113	1	0.997	2.16022e-11	thymosin beta 4 X-linked [Source:HGNC Symbol	10	Radial Glia
PRDX6	7.10753e-16	0.387805	0.982	0.976	1.47758e-11	peroxiredoxin 6 [Source:HGNC Symbol	10	Radial Glia
PKIB	1.58387e-17	0.312436	0.235	0.024	3.29271e-13	cAMP-dependent protein kinase inhibitor beta [Source:HGNC Symbol	10	Radial Glia
CRABP2	3.31002e-18	0.635796	0.793	0.539	6.8812e-14	cellular retinoic acid binding protein 2 [Source:HGNC Symbol	10	Radial Glia
C1orf54	9.82836e-19	0.615922	0.707	0.461	2.04322e-14	chromosome 1 open reading frame 54 [Source:HGNC Symbol	10	Radial Glia
RPL39L	3.24498e-19	0.467675	0.579	0.239	6.74598e-15	ribosomal protein L39 like [Source:HGNC Symbol	10	Radial Glia
RPL3	9.22646e-21	0.275671	1	1	1.91809e-16	ribosomal protein L3 [Source:HGNC Symbol	10	Radial Glia
EDNRB	3.29307e-21	0.506292	0.431	0.114	6.84597e-17	endothelin receptor type B [Source:HGNC Symbol	10	Radial Glia
GPC3	2.29721e-22	0.676046	0.781	0.431	4.77567e-18	glypican 3 [Source:HGNC Symbol	10	Radial Glia
RPS18	3.71783e-24	0.300977	1	1	7.729e-20	ribosomal protein S18 [Source:HGNC Symbol	10	Radial Glia
TMBIM4,1	9.57327e-25	0.508286	0.564	0.178	1.99019e-20	NA	10	Radial Glia
SLC25A6	7.18343e-25	0.499952	0.987	0.96	1.49336e-20	solute carrier family 25 member 6 [Source:HGNC Symbol	10	Radial Glia
NGFRAP1	3.29496e-25	0.453644	1	1	6.84989e-21	NA	10	Radial Glia
MEIS2	6.38748e-26	-0.813253	0.413	0.744	1.32789e-21	Meis homeobox 2 [Source:HGNC Symbol	10	Radial Glia
CHCHD2	4.83575e-26	-0.567846	0.911	0.99	1.0053e-21	coiled-coil-helix-coiled-coil-helix domain containing 2 [Source:HGNC Symbol	10	Radial Glia
YBX1	1.57714e-26	-0.383542	1	1	3.27872e-22	Y-box binding protein 1 [Source:HGNC Symbol	10	Radial Glia
PRDX4	1.56297e-26	0.590552	0.967	0.869	3.24926e-22	peroxiredoxin 4 [Source:HGNC Symbol	10	Radial Glia
MORF4L2	4.79609e-27	0.552449	0.987	0.906	9.97059e-23	mortality factor 4 like 2 [Source:HGNC Symbol	10	Radial Glia
TMEM47	2.77693e-30	0.756268	0.816	0.468	5.77296e-26	transmembrane protein 47 [Source:HGNC Symbol	10	Radial Glia
BTF3	7.79738e-32	0.520612	0.997	0.993	1.621e-27	basic transcription factor 3 [Source:HGNC Symbol	10	Radial Glia
RPS6	1.67121e-37	0.414141	1	1	3.47427e-33	ribosomal protein S6 [Source:HGNC Symbol	10	Radial Glia
7SK,2	2.44548e-38	-1.69597	0.798	0.896	5.08392e-34	NA	10	Radial Glia
HNRNPAB	2.26052e-06	-0.278645	0.762	0.844	0.0469939	heterogeneous nuclear ribonucleoprotein A/B [Source:HGNC Symbol	7	Radial Glia
RRAGA	2.07933e-06	0.29203	0.479	0.329	0.0432271	Ras related GTP binding A [Source:HGNC Symbol	7	Radial Glia
HSP90AA1	1.95972e-06	-0.275469	0.997	0.998	0.0407406	heat shock protein 90 alpha family class A member 1 [Source:HGNC Symbol	7	Radial Glia
RBM41	1.87561e-06	0.27543	0.257	0.139	0.038992	RNA binding motif protein 41 [Source:HGNC Symbol	7	Radial Glia
TXLNG	1.82943e-06	0.269641	0.39	0.255	0.0380321	taxilin gamma [Source:HGNC Symbol	7	Radial Glia
RARRES2	1.64992e-06	0.292328	0.321	0.187	0.0343001	retinoic acid receptor responder 2 [Source:HGNC Symbol	7	Radial Glia
HES6	1.56613e-06	-0.431973	0.34	0.487	0.0325584	hes family bHLH transcription factor 6 [Source:HGNC Symbol	7	Radial Glia
CCND2	1.49785e-06	-0.472234	0.318	0.43	0.0311387	cyclin D2 [Source:HGNC Symbol	7	Radial Glia
PNRC1	1.47962e-06	-0.296017	0.781	0.861	0.0307598	proline rich nuclear receptor coactivator 1 [Source:HGNC Symbol	7	Radial Glia
CCNG1	1.45651e-06	0.301959	0.794	0.744	0.0302794	cyclin G1 [Source:HGNC Symbol	7	Radial Glia
STAT3	1.39868e-06	0.271977	0.519	0.352	0.0290771	signal transducer and activator of transcription 3 [Source:HGNC Symbol	7	Radial Glia
MAP1B	1.37621e-06	0.339621	0.92	0.863	0.0286101	microtubule associated protein 1B [Source:HGNC Symbol	7	Radial Glia
SFRP1	1.25838e-06	0.361743	0.214	0.109	0.0261605	secreted frizzled related protein 1 [Source:HGNC Symbol	7	Radial Glia
RAC3	1.21695e-06	-0.26385	0.225	0.374	0.0252991	Rac family small GTPase 3 [Source:HGNC Symbol	7	Radial Glia
TPI1	1.13287e-06	-0.301577	0.92	0.96	0.0235512	triosephosphate isomerase 1 [Source:HGNC Symbol	7	Radial Glia
SLC2A1	1.10959e-06	0.349139	0.556	0.43	0.0230673	solute carrier family 2 member 1 [Source:HGNC Symbol	7	Radial Glia
GYPC	1.02099e-06	0.298449	0.676	0.6	0.0212253	glycophorin C (Gerbich blood group) [Source:HGNC Symbol	7	Radial Glia
TMA16	8.44991e-07	-0.293581	0.358	0.503	0.0175665	translation machinery associated 16 homolog [Source:HGNC Symbol	7	Radial Glia
GINS2	7.63976e-07	-0.286269	0.259	0.355	0.0158823	GINS complex subunit 2 [Source:HGNC Symbol	7	Radial Glia
SETBP1	6.33689e-07	-0.338896	0.27	0.423	0.0131738	SET binding protein 1 [Source:HGNC Symbol	7	Radial Glia
AP3B1	4.80851e-07	0.31287	0.409	0.281	0.00999641	adaptor related protein complex 3 subunit beta 1 [Source:HGNC Symbol	7	Radial Glia
HNRNPU	4.71634e-07	-0.294787	0.778	0.87	0.00980479	heterogeneous nuclear ribonucleoprotein U [Source:HGNC Symbol	7	Radial Glia
NRIP3	3.47976e-07	0.253979	0.195	0.076	0.00723408	nuclear receptor interacting protein 3 [Source:HGNC Symbol	7	Radial Glia
SLC3A2	2.72953e-07	0.332319	0.767	0.643	0.00567442	solute carrier family 3 member 2 [Source:HGNC Symbol	7	Radial Glia
TPM4	2.3143e-07	-0.303345	0.537	0.686	0.0048112	tropomyosin 4 [Source:HGNC Symbol	7	Radial Glia
ATOX1	2.07045e-07	0.288764	0.765	0.679	0.00430425	antioxidant 1 copper chaperone [Source:HGNC Symbol	7	Radial Glia
PSMD10	2.03744e-07	0.306263	0.425	0.274	0.00423564	proteasome 26S subunit; non-ATPase 10 [Source:HGNC Symbol	7	Radial Glia
CHM	1.80462e-07	0.279362	0.267	0.132	0.00375162	CHM Rab escort protein [Source:HGNC Symbol	7	Radial Glia
PPA1	1.31903e-07	-0.30724	0.727	0.847	0.00274212	pyrophosphatase (inorganic) 1 [Source:HGNC Symbol	7	Radial Glia
FBLN1	1.22578e-07	-0.308934	0.176	0.34	0.00254827	fibulin 1 [Source:HGNC Symbol	7	Radial Glia
ATP6V1H	1.21155e-07	0.295251	0.364	0.206	0.0025187	ATPase H+ transporting V1 subunit H [Source:HGNC Symbol	7	Radial Glia
TCEAL3	1.0848e-07	0.362563	0.441	0.298	0.00225519	transcription elongation factor A like 3 [Source:HGNC Symbol	7	Radial Glia
HIST1H1E	1.05424e-07	-0.396234	0.259	0.406	0.00219167	histone cluster 1 H1 family member e [Source:HGNC Symbol	7	Radial Glia
RHEB	9.48282e-08	0.300059	0.717	0.619	0.00197138	Ras homolog; mTORC1 binding [Source:HGNC Symbol	7	Radial Glia
STMN1	8.43151e-08	-0.282814	0.952	0.981	0.00175283	stathmin 1 [Source:HGNC Symbol	7	Radial Glia
XIAP	5.28175e-08	0.344389	0.417	0.26	0.00109802	X-linked inhibitor of apoptosis [Source:HGNC Symbol	7	Radial Glia
UBB	4.97764e-08	0.262439	0.963	0.887	0.0010348	ubiquitin B [Source:HGNC Symbol	7	Radial Glia
IMPDH2	3.92178e-08	-0.281759	0.709	0.849	0.000815298	inosine monophosphate dehydrogenase 2 [Source:HGNC Symbol	7	Radial Glia
NT5DC2	3.67653e-08	-0.345524	0.46	0.614	0.000764313	5'-nucleotidase domain containing 2 [Source:HGNC Symbol	7	Radial Glia
DCXR	3.36288e-08	0.32938	0.684	0.539	0.000699109	dicarbonyl and L-xylulose reductase [Source:HGNC Symbol	7	Radial Glia
PGM5-AS1	3.28755e-08	-0.447293	0.128	0.284	0.000683448	PGM5 antisense RNA 1 [Source:HGNC Symbol	7	Radial Glia
COMMD3	3.17109e-08	-0.260156	0.19	0.364	0.000659238	COMM domain containing 3 [Source:HGNC Symbol	7	Radial Glia
SCUBE2	2.89022e-08	0.345634	0.217	0.094	0.000600847	signal peptide; CUB domain and EGF like domain containing 2 [Source:HGNC Symbol	7	Radial Glia
TCEAL7	2.79506e-08	0.404978	0.559	0.407	0.000581065	transcription elongation factor A like 7 [Source:HGNC Symbol	7	Radial Glia
MT-ND4	2.70934e-08	0.382883	0.979	0.967	0.000563246	mitochondrially encoded NADH:ubiquinone oxidoreductase core subunit 4 [Source:HGNC Symbol	7	Radial Glia
CANX	2.70801e-08	0.304646	0.794	0.756	0.000562967	calnexin [Source:HGNC Symbol	7	Radial Glia
PTGES3	2.67483e-08	-0.304221	0.89	0.948	0.000556071	prostaglandin E synthase 3 [Source:HGNC Symbol	7	Radial Glia
HMGN1	2.30561e-08	0.289773	0.949	0.903	0.000479314	high mobility group nucleosome binding domain 1 [Source:HGNC Symbol	7	Radial Glia
MTRNR2L2	2.30167e-08	-0.289517	0.12	0.267	0.000478494	MT-RNR2 like 2 [Source:HGNC Symbol	7	Radial Glia
EIF4G2	2.24969e-08	-0.339231	0.813	0.882	0.000467688	eukaryotic translation initiation factor 4 gamma 2 [Source:HGNC Symbol	7	Radial Glia
AP1S2	2.14901e-08	0.317889	0.42	0.27	0.000446757	adaptor related protein complex 1 subunit sigma 2 [Source:HGNC Symbol	7	Radial Glia
CENPV	2.0009e-08	-0.367663	0.711	0.806	0.000415966	centromere protein V [Source:HGNC Symbol	7	Radial Glia
HMGB1	1.88329e-08	-0.309218	0.981	0.997	0.000391517	high mobility group box 1 [Source:HGNC Symbol	7	Radial Glia
C12orf57	1.1772e-08	-0.317623	0.882	0.945	0.000244728	chromosome 12 open reading frame 57 [Source:HGNC Symbol	7	Radial Glia
FADS1	1.14542e-08	-0.354178	0.513	0.681	0.000238121	fatty acid desaturase 1 [Source:HGNC Symbol	7	Radial Glia
IDI1	8.65658e-09	-0.410995	0.559	0.688	0.000179962	isopentenyl-diphosphate delta isomerase 1 [Source:HGNC Symbol	7	Radial Glia
MAB21L1	8.49756e-09	-0.445047	0.34	0.522	0.000176656	mab-21 like 1 [Source:HGNC Symbol	7	Radial Glia
DEK	8.48106e-09	-0.357303	0.783	0.858	0.000176313	DEK proto-oncogene [Source:HGNC Symbol	7	Radial Glia
EIF5	8.38531e-09	-0.32374	0.818	0.915	0.000174322	eukaryotic translation initiation factor 5 [Source:HGNC Symbol	7	Radial Glia
ZNF22	7.9256e-09	-0.34549	0.479	0.646	0.000164765	zinc finger protein 22 [Source:HGNC Symbol	7	Radial Glia
MT-CO3	6.53843e-09	0.550729	0.981	0.969	0.000135927	mitochondrially encoded cytochrome c oxidase III [Source:HGNC Symbol	7	Radial Glia
DRAXIN	6.52917e-09	0.39267	0.698	0.544	0.000135735	dorsal inhibitory axon guidance protein [Source:HGNC Symbol	7	Radial Glia
WLS	6.49916e-09	-0.356952	0.484	0.671	0.000135111	Wnt ligand secretion mediator [Source:HGNC Symbol	7	Radial Glia
RBBP7	6.43797e-09	0.349451	0.588	0.44	0.000133839	RB binding protein 7; chromatin remodeling factor [Source:HGNC Symbol	7	Radial Glia
EIF3J	5.32419e-09	-0.361766	0.567	0.702	0.000110685	eukaryotic translation initiation factor 3 subunit J [Source:HGNC Symbol	7	Radial Glia
DDR1	5.016e-09	0.329112	0.484	0.289	0.000104278	discoidin domain receptor tyrosine kinase 1 [Source:HGNC Symbol	7	Radial Glia
HN1	4.72358e-09	-0.307554	0.89	0.958	9.81984e-05	NA	7	Radial Glia
HNRNPDL	4.54386e-09	-0.313948	0.963	0.977	9.44623e-05	heterogeneous nuclear ribonucleoprotein D like [Source:HGNC Symbol	7	Radial Glia
SET	4.1828e-09	-0.305626	0.947	0.986	8.69562e-05	SET nuclear proto-oncogene [Source:HGNC Symbol	7	Radial Glia
TSC22D3	4.08712e-09	0.334488	0.348	0.189	8.49671e-05	TSC22 domain family member 3 [Source:HGNC Symbol	7	Radial Glia
SPARC	3.54763e-09	0.377054	0.791	0.721	7.37517e-05	secreted protein acidic and cysteine rich [Source:HGNC Symbol	7	Radial Glia
ZNF711	2.85229e-09	-0.350735	0.313	0.513	5.92962e-05	zinc finger protein 711 [Source:HGNC Symbol	7	Radial Glia
CRABP2	2.77372e-09	0.426215	0.537	0.352	5.76628e-05	cellular retinoic acid binding protein 2 [Source:HGNC Symbol	7	Radial Glia
RN7SL1	2.72589e-09	-0.446849	0.305	0.466	5.66685e-05	RNA component of signal recognition particle 7SL1 [Source:HGNC Symbol	7	Radial Glia
CTSL	2.41626e-09	0.344259	0.436	0.255	5.02316e-05	cathepsin L [Source:HGNC Symbol	7	Radial Glia
RPRM	2.27389e-09	0.382123	0.412	0.241	4.72719e-05	reprimo; TP53 dependent G2 arrest mediator homolog [Source:HGNC Symbol	7	Radial Glia
SYAP1	2.25137e-09	0.361343	0.527	0.333	4.68036e-05	synapse associated protein 1 [Source:HGNC Symbol	7	Radial Glia
DPYSL2	2.2099e-09	-0.390961	0.599	0.723	4.59416e-05	dihydropyrimidinase like 2 [Source:HGNC Symbol	7	Radial Glia
SDC3	2.19964e-09	0.252918	0.251	0.099	4.57282e-05	syndecan 3 [Source:HGNC Symbol	7	Radial Glia
SQLE	2.06235e-09	-0.442857	0.695	0.832	4.28742e-05	squalene epoxidase [Source:HGNC Symbol	7	Radial Glia
NASP	1.94299e-09	-0.455376	0.791	0.861	4.03928e-05	nuclear autoantigenic sperm protein [Source:HGNC Symbol	7	Radial Glia
JPX	1.79137e-09	0.36827	0.529	0.357	3.72408e-05	JPX transcript; XIST activator [Source:HGNC Symbol	7	Radial Glia
FDPS	1.5926e-09	-0.382563	0.717	0.825	3.31086e-05	farnesyl diphosphate synthase [Source:HGNC Symbol	7	Radial Glia
GPC3	1.41385e-09	0.298936	0.243	0.094	2.93926e-05	glypican 3 [Source:HGNC Symbol	7	Radial Glia
CITED2	1.28009e-09	-0.44948	0.471	0.641	2.66118e-05	Cbp/p300 interacting transactivator with Glu/Asp rich carboxy-terminal domain 2 [Source:HGNC Symbol	7	Radial Glia
SLC43A2	1.26022e-09	0.294476	0.326	0.154	2.61988e-05	solute carrier family 43 member 2 [Source:HGNC Symbol	7	Radial Glia
ACAT2	1.21079e-09	-0.462329	0.5	0.648	2.51712e-05	acetyl-CoA acetyltransferase 2 [Source:HGNC Symbol	7	Radial Glia
TFDP2	1.14747e-09	-0.365254	0.674	0.828	2.38547e-05	transcription factor Dp-2 [Source:HGNC Symbol	7	Radial Glia
GNG11	7.00026e-10	0.518257	0.634	0.542	1.45528e-05	G protein subunit gamma 11 [Source:HGNC Symbol	7	Radial Glia
FAM46A	4.5834e-10	-0.421626	0.222	0.418	9.52843e-06	NA	7	Radial Glia
TOX3	4.35031e-10	-0.446276	0.5	0.664	9.04386e-06	TOX high mobility group box family member 3 [Source:HGNC Symbol	7	Radial Glia
DNAJA1	4.07321e-10	-0.352701	0.885	0.938	8.46779e-06	DnaJ heat shock protein family (Hsp40) member A1 [Source:HGNC Symbol	7	Radial Glia
ZSCAN18	3.81858e-10	0.386608	0.65	0.492	7.93844e-06	zinc finger and SCAN domain containing 18 [Source:HGNC Symbol	7	Radial Glia
CASK	3.17938e-10	0.314312	0.364	0.175	6.60961e-06	calcium/calmodulin dependent serine protein kinase [Source:HGNC Symbol	7	Radial Glia
GUK1	2.44799e-10	0.344479	0.816	0.756	5.08913e-06	guanylate kinase 1 [Source:HGNC Symbol	7	Radial Glia
FDFT1	2.12254e-10	-0.384161	0.684	0.834	4.41255e-06	farnesyl-diphosphate farnesyltransferase 1 [Source:HGNC Symbol	7	Radial Glia
FDFT1	2.12254e-10	-0.384161	0.684	0.834	4.41255e-06	farnesyl-diphosphate farnesyltransferase 1 [Source:NCBI gene	7	Radial Glia
HMGCS1	2.10859e-10	-0.456523	0.54	0.711	4.38355e-06	3-hydroxy-3-methylglutaryl-CoA synthase 1 [Source:HGNC Symbol	7	Radial Glia
RPS10	2.03006e-10	0.251412	0.971	0.99	4.22029e-06	ribosomal protein S10 [Source:HGNC Symbol	7	Radial Glia
RBMX2	1.77034e-10	0.400801	0.545	0.36	3.68035e-06	RNA binding motif protein X-linked 2 [Source:HGNC Symbol	7	Radial Glia
MRPL3	1.47689e-10	0.42326	0.644	0.473	3.0703e-06	mitochondrial ribosomal protein L3 [Source:HGNC Symbol	7	Radial Glia
RAN	1.076e-10	-0.314084	0.952	0.986	2.23689e-06	RAN; member RAS oncogene family [Source:HGNC Symbol	7	Radial Glia
BTG1	8.74958e-11	-0.405044	0.973	0.995	1.81895e-06	BTG anti-proliferation factor 1 [Source:HGNC Symbol	7	Radial Glia
GDF15	7.68665e-11	0.419595	0.254	0.095	1.59798e-06	growth differentiation factor 15 [Source:HGNC Symbol	7	Radial Glia
ZNF280D	7.41192e-11	-0.25118	0.048	0.194	1.54086e-06	zinc finger protein 280D [Source:HGNC Symbol	7	Radial Glia
COL1A2	5.51121e-11	0.420774	0.195	0.052	1.14573e-06	collagen type I alpha 2 chain [Source:HGNC Symbol	7	Radial Glia
LDHA	4.33647e-11	0.626233	0.481	0.282	9.01509e-07	lactate dehydrogenase A [Source:HGNC Symbol	7	Radial Glia
TLE4	3.92561e-11	-0.483389	0.599	0.761	8.16095e-07	TLE family member 4; transcriptional corepressor [Source:HGNC Symbol	7	Radial Glia
ATP6V0E1	3.92528e-11	0.399662	0.604	0.409	8.16026e-07	ATPase H+ transporting V0 subunit e1 [Source:HGNC Symbol	7	Radial Glia
TCEAL2	3.44631e-11	-0.335699	0.152	0.352	7.16453e-07	transcription elongation factor A like 2 [Source:HGNC Symbol	7	Radial Glia
SMARCA1	2.9885e-11	0.419463	0.591	0.397	6.21279e-07	SWI/SNF related; matrix associated; actin dependent regulator of chromatin; subfamily a; member 1 [Source:HGNC Symbol	7	Radial Glia
TFPI2	2.23153e-11	0.651507	0.305	0.153	4.63913e-07	tissue factor pathway inhibitor 2 [Source:HGNC Symbol	7	Radial Glia
CSRP2	1.42375e-11	-0.428714	0.535	0.711	2.95984e-07	cysteine and glycine rich protein 2 [Source:HGNC Symbol	7	Radial Glia
PCSK1	8.11226e-12	-0.381981	0.061	0.225	1.68646e-07	proprotein convertase subtilisin/kexin type 1 [Source:HGNC Symbol	7	Radial Glia
LINC01158	1.88759e-12	-0.543242	0.642	0.776	3.92412e-08	NA	7	Radial Glia
USP11	1.2847e-12	0.474072	0.612	0.44	2.67076e-08	ubiquitin specific peptidase 11 [Source:HGNC Symbol	7	Radial Glia
TUBB	1.17678e-12	-0.400159	0.949	0.976	2.44641e-08	tubulin beta class I [Source:HGNC Symbol	7	Radial Glia
CKB	9.02086e-13	-0.336834	0.995	0.995	1.87535e-08	creatine kinase B [Source:HGNC Symbol	7	Radial Glia
PPDPF	7.24645e-13	0.337427	0.979	0.979	1.50647e-08	pancreatic progenitor cell differentiation and proliferation factor [Source:HGNC Symbol	7	Radial Glia
SNHG8	6.71375e-13	0.444169	0.791	0.648	1.39572e-08	small nucleolar RNA host gene 8 [Source:HGNC Symbol	7	Radial Glia
YWHAE	5.05238e-13	-0.358388	0.96	0.977	1.05034e-08	tyrosine 3-monooxygenase/tryptophan 5-monooxygenase activation protein epsilon [Source:HGNC Symbol	7	Radial Glia
TIMP1	4.77085e-13	0.469272	0.532	0.31	9.91812e-09	TIMP metallopeptidase inhibitor 1 [Source:HGNC Symbol	7	Radial Glia
PTPRZ1	4.2076e-13	-0.521951	0.564	0.756	8.74719e-09	protein tyrosine phosphatase receptor type Z1 [Source:HGNC Symbol	7	Radial Glia
PHPT1	3.51717e-13	0.34036	0.963	0.951	7.31185e-09	phosphohistidine phosphatase 1 [Source:HGNC Symbol	7	Radial Glia
HES4	2.7343e-13	-0.425288	0.896	0.969	5.68435e-09	hes family bHLH transcription factor 4 [Source:HGNC Symbol	7	Radial Glia
CMTM8	1.89698e-13	0.292115	0.222	0.057	3.94362e-09	CKLF like MARVEL transmembrane domain containing 8 [Source:HGNC Symbol	7	Radial Glia
PCDHB2	1.66399e-13	0.304051	0.246	0.069	3.45927e-09	protocadherin beta 2 [Source:HGNC Symbol	7	Radial Glia
MARCKS	1.2328e-13	-0.308716	0.995	0.998	2.56286e-09	myristoylated alanine rich protein kinase C substrate [Source:HGNC Symbol	7	Radial Glia
EIF2S3	1.14399e-13	0.440358	0.719	0.518	2.37825e-09	eukaryotic translation initiation factor 2 subunit gamma [Source:HGNC Symbol	7	Radial Glia
SOX4	9.05965e-14	-0.566856	0.829	0.924	1.88341e-09	SRY-box transcription factor 4 [Source:HGNC Symbol	7	Radial Glia
HSP90AB1	8.69408e-14	-0.277494	1	1	1.80741e-09	heat shock protein 90 alpha family class B member 1 [Source:HGNC Symbol	7	Radial Glia
MT-ND1	5.98348e-14	0.541223	0.939	0.924	1.2439e-09	mitochondrially encoded NADH:ubiquinone oxidoreductase core subunit 1 [Source:HGNC Symbol	7	Radial Glia
VAMP2	3.72844e-14	0.436908	0.84	0.769	7.75105e-10	vesicle associated membrane protein 2 [Source:HGNC Symbol	7	Radial Glia
SMS	3.17188e-14	0.471121	0.655	0.445	6.59402e-10	spermine synthase [Source:HGNC Symbol	7	Radial Glia
DLK1	2.00172e-14	0.927484	0.952	0.91	4.16138e-10	delta like non-canonical Notch ligand 1 [Source:HGNC Symbol	7	Radial Glia
SNCG	1.43822e-14	0.462086	0.259	0.08	2.98991e-10	synuclein gamma [Source:HGNC Symbol	7	Radial Glia
RPS29	1.32452e-14	-0.261512	1	0.998	2.75355e-10	ribosomal protein S29 [Source:HGNC Symbol	7	Radial Glia
WBP5	8.93956e-15	0.474563	0.759	0.598	1.85845e-10	NA	7	Radial Glia
GSN	6.59989e-15	0.435924	0.38	0.154	1.37205e-10	gelsolin [Source:HGNC Symbol	7	Radial Glia
MAGED2	6.19623e-15	0.418326	0.906	0.893	1.28814e-10	MAGE family member D2 [Source:HGNC Symbol	7	Radial Glia
GAPDH	4.65912e-15	-0.378309	0.995	0.998	9.68584e-11	glyceraldehyde-3-phosphate dehydrogenase [Source:HGNC Symbol	7	Radial Glia
COL4A6	4.59602e-15	0.546516	0.54	0.34	9.55467e-11	collagen type IV alpha 6 chain [Source:HGNC Symbol	7	Radial Glia
RABAC1	1.42098e-15	0.425129	0.856	0.802	2.95408e-11	Rab acceptor 1 [Source:HGNC Symbol	7	Radial Glia
FSIP2	1.00795e-15	0.276543	0.158	0.019	2.09544e-11	fibrous sheath interacting protein 2 [Source:HGNC Symbol	7	Radial Glia
H2AFZ	8.83581e-16	-0.497344	0.912	0.965	1.83688e-11	H2A histone family member Z [Source:HGNC Symbol	7	Radial Glia
TMSB15A	8.71511e-16	-0.523181	0.743	0.893	1.81178e-11	thymosin beta 15a [Source:HGNC Symbol	7	Radial Glia
TMBIM4,1	4.99011e-16	0.457523	0.396	0.163	1.03739e-11	NA	7	Radial Glia
SPARCL1	2.46987e-16	0.446755	0.209	0.036	5.13461e-12	SPARC like 1 [Source:HGNC Symbol	7	Radial Glia
PGM5	4.3854e-17	-0.472838	0.123	0.367	9.11681e-13	phosphoglucomutase 5 [Source:HGNC Symbol	7	Radial Glia
NPC2	2.84346e-17	0.538243	0.701	0.537	5.91128e-13	NPC intracellular cholesterol transporter 2 [Source:HGNC Symbol	7	Radial Glia
COL4A5	2.05057e-17	0.53817	0.537	0.295	4.26293e-13	collagen type IV alpha 5 chain [Source:HGNC Symbol	7	Radial Glia
RPL39L	6.29384e-18	0.29941	0.198	0.029	1.30843e-13	ribosomal protein L39 like [Source:HGNC Symbol	7	Radial Glia
CD99	5.92303e-18	0.545106	0.706	0.492	1.23134e-13	CD99 molecule (Xg blood group) [Source:HGNC Symbol	7	Radial Glia
NUDT16	5.35216e-18	0.437198	0.369	0.13	1.11266e-13	nudix hydrolase 16 [Source:HGNC Symbol	7	Radial Glia
CLU	4.70529e-18	0.638999	0.69	0.468	9.78183e-14	clusterin [Source:HGNC Symbol	7	Radial Glia
TFCP2	3.29732e-18	0.277462	0.193	0.026	6.8548e-14	transcription factor CP2 [Source:HGNC Symbol	7	Radial Glia
PCLO	1.51678e-18	0.622954	0.567	0.31	3.15324e-14	piccolo presynaptic cytomatrix protein [Source:HGNC Symbol	7	Radial Glia
CEBPZ-AS1	4.0895e-19	0.342834	0.182	0.017	8.50165e-15	NA	7	Radial Glia
UBA1	1.44079e-19	0.507946	0.628	0.409	2.99526e-15	ubiquitin like modifier activating enzyme 1 [Source:HGNC Symbol	7	Radial Glia
TCEAL8	1.36947e-19	0.542581	0.703	0.459	2.847e-15	transcription elongation factor A like 8 [Source:HGNC Symbol	7	Radial Glia
ZNF677	1.00167e-19	0.354903	0.27	0.059	2.08237e-15	zinc finger protein 677 [Source:HGNC Symbol	7	Radial Glia
PHYHIPL	3.30947e-20	-0.532449	0.168	0.444	6.88005e-16	phytanoyl-CoA 2-hydroxylase interacting protein like [Source:HGNC Symbol	7	Radial Glia
PRDX6	1.20244e-20	0.46388	0.928	0.898	2.49976e-16	peroxiredoxin 6 [Source:HGNC Symbol	7	Radial Glia
ZNF682	3.59384e-21	0.359111	0.233	0.033	7.47122e-17	zinc finger protein 682 [Source:HGNC Symbol	7	Radial Glia
PEG10	3.49653e-21	-0.819972	0.834	0.939	7.26895e-17	paternally expressed 10 [Source:HGNC Symbol	7	Radial Glia
TMEM47	7.81113e-22	0.609245	0.516	0.256	1.62386e-17	transmembrane protein 47 [Source:HGNC Symbol	7	Radial Glia
MEIS2	2.43479e-22	-0.604831	0.762	0.912	5.06169e-18	Meis homeobox 2 [Source:HGNC Symbol	7	Radial Glia
SAT1	2.08718e-22	0.764419	0.631	0.35	4.33903e-18	spermidine/spermine N1-acetyltransferase 1 [Source:HGNC Symbol	7	Radial Glia
YBX1	6.40835e-23	-0.433021	0.981	0.997	1.33223e-18	Y-box binding protein 1 [Source:HGNC Symbol	7	Radial Glia
PKIB	4.20314e-23	0.304849	0.182	0.009	8.7379e-19	cAMP-dependent protein kinase inhibitor beta [Source:HGNC Symbol	7	Radial Glia
TMSB15B	1.84451e-24	0.572822	0.417	0.13	3.83456e-20	thymosin beta 15B [Source:HGNC Symbol	7	Radial Glia
TMSB15B	1.84451e-24	0.572822	0.417	0.13	3.83456e-20	thymosin beta 15B [Source:NCBI gene	7	Radial Glia
CLEC11A	1.77854e-24	0.324211	0.182	0.007	3.6974e-20	C-type lectin domain containing 11A [Source:HGNC Symbol	7	Radial Glia
COMT	6.86593e-25	0.4239	0.257	0.036	1.42736e-20	catechol-O-methyltransferase [Source:HGNC Symbol	7	Radial Glia
DUSP15	5.24063e-25	0.449035	0.364	0.087	1.08947e-20	dual specificity phosphatase 15 [Source:HGNC Symbol	7	Radial Glia
EEF1D	1.32278e-25	-0.492274	0.963	0.984	2.74993e-21	eukaryotic translation elongation factor 1 delta [Source:HGNC Symbol	7	Radial Glia
BEX4	1.50283e-26	0.638005	0.842	0.674	3.12424e-22	brain expressed X-linked 4 [Source:HGNC Symbol	7	Radial Glia
RPL18A	8.62976e-27	-0.280326	1	1	1.79404e-22	ribosomal protein L18a [Source:HGNC Symbol	7	Radial Glia
TMSB4X	6.34219e-27	0.733525	0.992	0.99	1.31848e-22	thymosin beta 4 X-linked [Source:HGNC Symbol	7	Radial Glia
CCDC160	5.14649e-27	0.575837	0.43	0.125	1.0699e-22	coiled-coil domain containing 160 [Source:HGNC Symbol	7	Radial Glia
GOPC	2.71045e-27	0.590871	0.519	0.189	5.63476e-23	golgi associated PDZ and coiled-coil motif containing [Source:HGNC Symbol	7	Radial Glia
ATP6AP2	1.83186e-27	0.631436	0.783	0.579	3.80826e-23	ATPase H+ transporting accessory protein 2 [Source:HGNC Symbol	7	Radial Glia
BEX2	1.65058e-27	0.714403	0.837	0.6	3.43139e-23	brain expressed X-linked 2 [Source:HGNC Symbol	7	Radial Glia
LINC01021	6.93332e-30	0.70413	0.503	0.156	1.44137e-25	NA	7	Radial Glia
MDK	3.48578e-30	0.65726	0.979	0.951	7.24659e-26	midkine [Source:HGNC Symbol	7	Radial Glia
MORF4L2	2.94371e-30	0.670555	0.858	0.678	6.11969e-26	mortality factor 4 like 2 [Source:HGNC Symbol	7	Radial Glia
C1orf54	1.43907e-30	0.816942	0.714	0.435	2.99169e-26	chromosome 1 open reading frame 54 [Source:HGNC Symbol	7	Radial Glia
EIF1AX	1.84342e-31	0.674914	0.944	0.802	3.83228e-27	eukaryotic translation initiation factor 1A X-linked [Source:HGNC Symbol	7	Radial Glia
VAT1L	2.51125e-32	0.598015	0.353	0.055	5.22064e-28	vesicle amine transport 1 like [Source:HGNC Symbol	7	Radial Glia
SLC44A2	1.39099e-34	0.740833	0.561	0.211	2.89174e-30	solute carrier family 44 member 2 [Source:HGNC Symbol	7	Radial Glia
HMGB2	1.94775e-35	0.732354	0.896	0.69	4.04918e-31	high mobility group box 2 [Source:HGNC Symbol	7	Radial Glia
NEAT1	4.88809e-37	1.16472	0.816	0.523	1.01618e-32	nuclear paraspeckle assembly transcript 1 [Source:HGNC Symbol	7	Radial Glia
PRDX4	9.70108e-38	0.792318	0.861	0.624	2.01676e-33	peroxiredoxin 4 [Source:HGNC Symbol	7	Radial Glia
RPS6	1.83e-42	0.418865	1	1	3.80438e-38	ribosomal protein S6 [Source:HGNC Symbol	7	Radial Glia
EDNRB	4.89831e-46	0.706439	0.35	0.021	1.01831e-41	endothelin receptor type B [Source:HGNC Symbol	7	Radial Glia
SLC25A6	1.12948e-57	0.884403	0.952	0.823	2.34808e-53	solute carrier family 25 member 6 [Source:HGNC Symbol	7	Radial Glia
NGFRAP1	1.32707e-65	0.810013	0.997	0.967	2.75885e-61	NA	7	Radial Glia
CHCHD2	3.28018e-68	-0.930556	0.818	0.981	6.81917e-64	coiled-coil-helix-coiled-coil-helix domain containing 2 [Source:HGNC Symbol	7	Radial Glia
BTF3	5.17872e-75	0.847765	0.992	0.96	1.0766e-70	basic transcription factor 3 [Source:HGNC Symbol	7	Radial Glia
7SK,2	1.59082e-90	-1.89808	0.898	0.974	3.30716e-86	NA	7	Radial Glia
CRMP1	2.39776e-06	-0.370042	0.459	0.426	0.049847	collapsin response mediator protein 1 [Source:HGNC Symbol	6	Radial Glia
HES1	2.37255e-06	-1.04889	0.273	0.345	0.0493229	hes family bHLH transcription factor 1 [Source:HGNC Symbol	6	Radial Glia
LRP2	2.31346e-06	0.303297	0.158	0.059	0.0480946	LDL receptor related protein 2 [Source:HGNC Symbol	6	Radial Glia
PLEKHG4B	2.27973e-06	0.31548	0.155	0.057	0.0473933	pleckstrin homology and RhoGEF domain containing G4B [Source:HGNC Symbol	6	Radial Glia
AMD1	2.19722e-06	-0.427294	0.387	0.363	0.0456779	adenosylmethionine decarboxylase 1 [Source:HGNC Symbol	6	Radial Glia
ANP32E	2.19418e-06	-0.299724	0.57	0.499	0.0456149	acidic nuclear phosphoprotein 32 family member E [Source:HGNC Symbol	6	Radial Glia
FAM32A	1.91507e-06	-0.275069	0.459	0.41	0.0398124	family with sequence similarity 32 member A [Source:HGNC Symbol	6	Radial Glia
MAPRE1	1.86417e-06	0.303603	0.381	0.234	0.0387541	microtubule associated protein RP/EB family member 1 [Source:HGNC Symbol	6	Radial Glia
TRMT10C	1.82807e-06	-0.383252	0.371	0.306	0.0380038	tRNA methyltransferase 10C; mitochondrial RNase P subunit [Source:HGNC Symbol	6	Radial Glia
EIF3F	1.81622e-06	0.28934	0.746	0.603	0.0377573	eukaryotic translation initiation factor 3 subunit F [Source:HGNC Symbol	6	Radial Glia
RDX	1.76244e-06	-0.267832	0.541	0.458	0.0366393	radixin [Source:HGNC Symbol	6	Radial Glia
BTG3	1.73335e-06	-0.28274	0.442	0.39	0.0360345	BTG anti-proliferation factor 3 [Source:HGNC Symbol	6	Radial Glia
CD63	1.59535e-06	0.255899	0.699	0.542	0.0331657	CD63 molecule [Source:HGNC Symbol	6	Radial Glia
GNG3	1.57704e-06	-0.631095	0.146	0.188	0.0327852	G protein subunit gamma 3 [Source:HGNC Symbol	6	Radial Glia
CEP170	1.55155e-06	-0.489988	0.232	0.274	0.0322551	centrosomal protein 170 [Source:HGNC Symbol	6	Radial Glia
UBE2T	1.53736e-06	-0.344981	0.467	0.426	0.0319602	ubiquitin conjugating enzyme E2 T [Source:HGNC Symbol	6	Radial Glia
EHBP1	1.3762e-06	-0.346356	0.103	0.218	0.0286098	EH domain binding protein 1 [Source:HGNC Symbol	6	Radial Glia
TPM4	1.37461e-06	-0.337747	0.527	0.478	0.0285767	tropomyosin 4 [Source:HGNC Symbol	6	Radial Glia
EVL	1.35723e-06	-0.359878	0.473	0.433	0.0282156	Enah/Vasp-like [Source:HGNC Symbol	6	Radial Glia
IDI1	1.3256e-06	-0.401987	0.447	0.413	0.027558	isopentenyl-diphosphate delta isomerase 1 [Source:HGNC Symbol	6	Radial Glia
NRARP	1.28877e-06	-0.25627	0.34	0.274	0.0267923	NOTCH regulated ankyrin repeat protein [Source:HGNC Symbol	6	Radial Glia
COA1	1.2571e-06	-0.273229	0.498	0.431	0.0261339	cytochrome c oxidase assembly factor 1 homolog [Source:HGNC Symbol	6	Radial Glia
ODC1	1.24947e-06	0.303982	0.823	0.717	0.0259751	ornithine decarboxylase 1 [Source:HGNC Symbol	6	Radial Glia
THSD7A	1.18575e-06	-0.475353	0.048	0.127	0.0246505	thrombospondin type 1 domain containing 7A [Source:HGNC Symbol	6	Radial Glia
TPX2	1.12835e-06	-0.44352	0.388	0.345	0.0234572	TPX2 microtubule nucleation factor [Source:HGNC Symbol	6	Radial Glia
FDFT1	1.08646e-06	-0.316899	0.543	0.517	0.0225863	farnesyl-diphosphate farnesyltransferase 1 [Source:HGNC Symbol	6	Radial Glia
FDFT1	1.08646e-06	-0.316899	0.543	0.517	0.0225863	farnesyl-diphosphate farnesyltransferase 1 [Source:NCBI gene	6	Radial Glia
AK2	1.05709e-06	0.253504	0.387	0.234	0.0219757	adenylate kinase 2 [Source:HGNC Symbol	6	Radial Glia
ABCF1	9.92996e-07	-0.352092	0.419	0.354	0.0206434	ATP binding cassette subfamily F member 1 [Source:HGNC Symbol	6	Radial Glia
EIF3E	9.71321e-07	0.294674	0.77	0.639	0.0201928	eukaryotic translation initiation factor 3 subunit E [Source:HGNC Symbol	6	Radial Glia
IER5	9.28256e-07	-0.377658	0.201	0.166	0.0192975	immediate early response 5 [Source:HGNC Symbol	6	Radial Glia
TMSB4X	9.19182e-07	0.341016	0.911	0.848	0.0191089	thymosin beta 4 X-linked [Source:HGNC Symbol	6	Radial Glia
RAB34	8.89903e-07	0.305724	0.237	0.111	0.0185002	RAB34; member RAS oncogene family [Source:HGNC Symbol	6	Radial Glia
PRTG	8.63123e-07	0.285215	0.27	0.136	0.0179435	protogenin [Source:HGNC Symbol	6	Radial Glia
MRFAP1	8.35496e-07	-0.390394	0.613	0.565	0.0173691	Morf4 family associated protein 1 [Source:HGNC Symbol	6	Radial Glia
RPL26	7.69964e-07	0.329305	0.947	0.896	0.0160068	ribosomal protein L26 [Source:HGNC Symbol	6	Radial Glia
PSME2	7.5586e-07	0.369382	0.5	0.34	0.0157136	proteasome activator subunit 2 [Source:HGNC Symbol	6	Radial Glia
HIST1H1E	6.87033e-07	-0.514867	0.493	0.485	0.0142827	histone cluster 1 H1 family member e [Source:HGNC Symbol	6	Radial Glia
RPL7A	6.41238e-07	0.294177	0.964	0.941	0.0133307	ribosomal protein L7a [Source:HGNC Symbol	6	Radial Glia
IDH1	5.78334e-07	-0.364634	0.395	0.342	0.012023	isocitrate dehydrogenase (NADP(+)) 1; cytosolic [Source:HGNC Symbol	6	Radial Glia
PLD3	5.23685e-07	0.260492	0.483	0.317	0.0108869	phospholipase D family member 3 [Source:HGNC Symbol	6	Radial Glia
MTRNR2L8	4.58185e-07	-0.626551	0.808	0.748	0.00952522	MT-RNR2 like 8 [Source:HGNC Symbol	6	Radial Glia
RPS12	4.53655e-07	0.273914	0.966	0.907	0.00943103	ribosomal protein S12 [Source:HGNC Symbol	6	Radial Glia
PDE4D	4.11647e-07	0.325166	0.268	0.132	0.00855773	phosphodiesterase 4D [Source:HGNC Symbol	6	Radial Glia
MDK	3.70195e-07	0.265571	0.83	0.692	0.00769599	midkine [Source:HGNC Symbol	6	Radial Glia
ZMIZ1	3.40077e-07	-0.542613	0.113	0.154	0.00706985	zinc finger MIZ-type containing 1 [Source:HGNC Symbol	6	Radial Glia
HIST1H2AL	3.38159e-07	-0.259263	0.23	0.202	0.00702999	histone cluster 1 H2A family member l [Source:HGNC Symbol	6	Radial Glia
TPM3	3.01e-07	-0.418587	0.522	0.49	0.00625749	tropomyosin 3 [Source:HGNC Symbol	6	Radial Glia
DYNC1I2	2.97119e-07	-0.465154	0.51	0.524	0.00617681	dynein cytoplasmic 1 intermediate chain 2 [Source:HGNC Symbol	6	Radial Glia
PAX6	2.94253e-07	0.293387	0.242	0.111	0.00611722	paired box 6 [Source:HGNC Symbol	6	Radial Glia
GAP43	2.63779e-07	-0.286103	0.235	0.186	0.00548371	growth associated protein 43 [Source:HGNC Symbol	6	Radial Glia
BRI3	2.51184e-07	0.352726	0.634	0.465	0.00522186	brain protein I3 [Source:HGNC Symbol	6	Radial Glia
SNW1	2.49248e-07	-0.367422	0.45	0.399	0.00518161	SNW domain containing 1 [Source:HGNC Symbol	6	Radial Glia
EIF5B	2.38411e-07	-0.297195	0.548	0.488	0.00495633	eukaryotic translation initiation factor 5B [Source:HGNC Symbol	6	Radial Glia
SREK1IP1	2.37356e-07	-0.259562	0.431	0.336	0.0049344	SREK1 interacting protein 1 [Source:HGNC Symbol	6	Radial Glia
RABAC1	2.36146e-07	0.301987	0.675	0.51	0.00490925	Rab acceptor 1 [Source:HGNC Symbol	6	Radial Glia
GLOD4	2.29525e-07	0.295017	0.405	0.243	0.00477159	glyoxalase domain containing 4 [Source:HGNC Symbol	6	Radial Glia
SH3BGRL3	2.20182e-07	-0.301989	0.497	0.451	0.00457737	SH3 domain binding glutamate rich protein like 3 [Source:HGNC Symbol	6	Radial Glia
OCIAD1	2.15819e-07	-0.293862	0.521	0.447	0.00448667	OCIA domain containing 1 [Source:HGNC Symbol	6	Radial Glia
STMN2	2.06146e-07	-0.958555	0.189	0.283	0.00428557	stathmin 2 [Source:HGNC Symbol	6	Radial Glia
LMNB1	1.93542e-07	-0.428327	0.352	0.338	0.00402355	lamin B1 [Source:HGNC Symbol	6	Radial Glia
MT-CO2	1.91549e-07	0.420704	0.918	0.841	0.00398211	mitochondrially encoded cytochrome c oxidase II [Source:HGNC Symbol	6	Radial Glia
IRX2	1.91483e-07	0.280515	0.421	0.256	0.00398074	iroquois homeobox 2 [Source:HGNC Symbol	6	Radial Glia
MAZ	1.88533e-07	-0.305766	0.527	0.465	0.0039194	MYC associated zinc finger protein [Source:HGNC Symbol	6	Radial Glia
EGR1	1.86666e-07	-0.263385	0.259	0.175	0.00388059	early growth response 1 [Source:HGNC Symbol	6	Radial Glia
RAD23B	1.7919e-07	-0.261007	0.407	0.329	0.00372518	RAD23 homolog B; nucleotide excision repair protein [Source:HGNC Symbol	6	Radial Glia
RAD21	1.72871e-07	-0.413506	0.507	0.474	0.00359381	RAD21 cohesin complex component [Source:HGNC Symbol	6	Radial Glia
ITGB3BP	1.64027e-07	-0.332803	0.39	0.342	0.00340995	integrin subunit beta 3 binding protein [Source:HGNC Symbol	6	Radial Glia
ACAT2	1.63652e-07	-0.275827	0.536	0.46	0.00340215	acetyl-CoA acetyltransferase 2 [Source:HGNC Symbol	6	Radial Glia
ATP6AP2	1.58909e-07	0.266858	0.545	0.37	0.00330355	ATPase H+ transporting accessory protein 2 [Source:HGNC Symbol	6	Radial Glia
RRM2	1.56221e-07	-0.333631	0.345	0.317	0.00324768	ribonucleotide reductase regulatory subunit M2 [Source:HGNC Symbol	6	Radial Glia
FUBP1	1.49565e-07	-0.419511	0.383	0.349	0.0031093	far upstream element binding protein 1 [Source:HGNC Symbol	6	Radial Glia
HSPA4L	1.47099e-07	0.414218	0.316	0.166	0.00305803	heat shock protein family A (Hsp70) member 4 like [Source:HGNC Symbol	6	Radial Glia
NENF	1.27603e-07	0.253167	0.45	0.281	0.00265274	neudesin neurotrophic factor [Source:HGNC Symbol	6	Radial Glia
H1FX	1.22942e-07	-0.388209	0.716	0.673	0.00255584	H1 histone family member X [Source:HGNC Symbol	6	Radial Glia
GNAS	1.18785e-07	-0.280437	0.844	0.828	0.00246942	GNAS complex locus [Source:HGNC Symbol	6	Radial Glia
RPL7	1.16069e-07	0.31549	0.923	0.855	0.00241295	ribosomal protein L7 [Source:HGNC Symbol	6	Radial Glia
FZD2	1.15368e-07	0.287728	0.351	0.193	0.00239838	frizzled class receptor 2 [Source:HGNC Symbol	6	Radial Glia
MRPL3	1.12197e-07	0.339912	0.46	0.288	0.00233246	mitochondrial ribosomal protein L3 [Source:HGNC Symbol	6	Radial Glia
ZIC1	9.75765e-08	0.295515	0.481	0.306	0.00202852	Zic family member 1 [Source:HGNC Symbol	6	Radial Glia
RPL36A	9.43487e-08	0.333315	0.734	0.567	0.00196142	ribosomal protein L36a [Source:HGNC Symbol	6	Radial Glia
RPL22L1	9.23796e-08	0.354211	0.655	0.499	0.00192048	ribosomal protein L22 like 1 [Source:HGNC Symbol	6	Radial Glia
C7orf73	8.94491e-08	-0.315424	0.552	0.492	0.00185956	NA	6	Radial Glia
RPL27	8.72906e-08	0.299671	0.869	0.744	0.00181468	ribosomal protein L27 [Source:HGNC Symbol	6	Radial Glia
TRAPPC2L	8.18512e-08	0.312384	0.485	0.308	0.0017016	trafficking protein particle complex 2 like [Source:HGNC Symbol	6	Radial Glia
HIGD2A	7.32027e-08	0.320886	0.632	0.454	0.00152181	HIG1 hypoxia inducible domain family member 2A [Source:HGNC Symbol	6	Radial Glia
C7orf50	7.06597e-08	0.299389	0.636	0.46	0.00146894	chromosome 7 open reading frame 50 [Source:HGNC Symbol	6	Radial Glia
RHOB	6.81329e-08	-0.557481	0.259	0.245	0.00141641	ras homolog family member B [Source:HGNC Symbol	6	Radial Glia
PSMA7	6.78668e-08	-0.344157	0.718	0.683	0.00141088	proteasome subunit alpha 7 [Source:HGNC Symbol	6	Radial Glia
HN1	6.75012e-08	-0.323302	0.753	0.707	0.00140328	NA	6	Radial Glia
OLIG3	6.64133e-08	0.276007	0.136	0.036	0.00138067	oligodendrocyte transcription factor 3 [Source:HGNC Symbol	6	Radial Glia
SRSF5	6.00803e-08	-0.28215	0.682	0.599	0.00124901	serine and arginine rich splicing factor 5 [Source:HGNC Symbol	6	Radial Glia
DDX24	5.43856e-08	-0.330816	0.54	0.488	0.00113062	DEAD-box helicase 24 [Source:HGNC Symbol	6	Radial Glia
LINC01021	5.20237e-08	0.372772	0.172	0.057	0.00108152	NA	6	Radial Glia
YBX1	5.09081e-08	-0.275514	0.885	0.848	0.00105833	Y-box binding protein 1 [Source:HGNC Symbol	6	Radial Glia
MMADHC	4.50014e-08	0.280443	0.314	0.159	0.000935533	metabolism of cobalamin associated D [Source:HGNC Symbol	6	Radial Glia
MEST	4.48559e-08	0.375941	0.569	0.388	0.000932509	mesoderm specific transcript [Source:HGNC Symbol	6	Radial Glia
PLK2	4.44698e-08	-0.560042	0.366	0.342	0.000924483	polo like kinase 2 [Source:HGNC Symbol	6	Radial Glia
BTG1	4.35313e-08	-0.461356	0.713	0.651	0.000904972	BTG anti-proliferation factor 1 [Source:HGNC Symbol	6	Radial Glia
HADHB	3.70473e-08	0.262909	0.416	0.243	0.000770176	hydroxyacyl-CoA dehydrogenase trifunctional multienzyme complex subunit beta [Source:HGNC Symbol	6	Radial Glia
EIF3D	3.61721e-08	0.282594	0.589	0.406	0.000751981	eukaryotic translation initiation factor 3 subunit D [Source:HGNC Symbol	6	Radial Glia
DPYSL2	3.40723e-08	-0.518542	0.424	0.454	0.00070833	dihydropyrimidinase like 2 [Source:HGNC Symbol	6	Radial Glia
PNRC1	3.39193e-08	-0.476408	0.409	0.408	0.000705148	proline rich nuclear receptor coactivator 1 [Source:HGNC Symbol	6	Radial Glia
SEC11A	3.39174e-08	0.399213	0.672	0.533	0.000705109	SEC11 homolog A; signal peptidase complex subunit [Source:HGNC Symbol	6	Radial Glia
CHID1	2.94876e-08	0.270024	0.46	0.281	0.000613018	chitinase domain containing 1 [Source:HGNC Symbol	6	Radial Glia
DIO3	2.53241e-08	0.411822	0.199	0.073	0.000526462	iodothyronine deiodinase 3 [Source:HGNC Symbol	6	Radial Glia
RUNX1T1	2.33216e-08	-0.468669	0.06	0.17	0.000484833	RUNX1 partner transcriptional co-repressor 1 [Source:HGNC Symbol	6	Radial Glia
PNMA1	2.12012e-08	-0.258711	0.342	0.24	0.000440751	PNMA family member 1 [Source:HGNC Symbol	6	Radial Glia
BAALC	1.9471e-08	0.275226	0.253	0.109	0.000404782	BAALC binder of MAP3K1 and KLF4 [Source:HGNC Symbol	6	Radial Glia
SMARCE1	1.81399e-08	-0.410952	0.399	0.385	0.000377111	SWI/SNF related; matrix associated; actin dependent regulator of chromatin; subfamily e; member 1 [Source:HGNC Symbol	6	Radial Glia
EIF4A2	1.71584e-08	-0.368401	0.689	0.615	0.000356706	eukaryotic translation initiation factor 4A2 [Source:HGNC Symbol	6	Radial Glia
C19orf48	1.63846e-08	0.277807	0.562	0.374	0.000340619	chromosome 19 open reading frame 48 [Source:HGNC Symbol	6	Radial Glia
MT-ND1	1.60804e-08	0.466022	0.825	0.689	0.000334295	mitochondrially encoded NADH:ubiquinone oxidoreductase core subunit 1 [Source:HGNC Symbol	6	Radial Glia
GUK1	1.43112e-08	0.370022	0.674	0.494	0.000297516	guanylate kinase 1 [Source:HGNC Symbol	6	Radial Glia
CARHSP1	1.19645e-08	-0.252676	0.564	0.497	0.000248731	calcium regulated heat stable protein 1 [Source:HGNC Symbol	6	Radial Glia
BEX4	1.15445e-08	0.382416	0.658	0.476	0.000239998	brain expressed X-linked 4 [Source:HGNC Symbol	6	Radial Glia
CEBPB	1.13578e-08	0.294506	0.182	0.061	0.000236116	CCAAT enhancer binding protein beta [Source:HGNC Symbol	6	Radial Glia
RAN	1.06895e-08	-0.256451	0.802	0.746	0.000222223	RAN; member RAS oncogene family [Source:HGNC Symbol	6	Radial Glia
NEAT1	1.03155e-08	0.580027	0.55	0.361	0.00021445	nuclear paraspeckle assembly transcript 1 [Source:HGNC Symbol	6	Radial Glia
BLVRB	8.76367e-09	0.383066	0.387	0.211	0.000182188	biliverdin reductase B [Source:HGNC Symbol	6	Radial Glia
PPP1R14B	8.55421e-09	-0.317982	0.529	0.512	0.000177834	protein phosphatase 1 regulatory inhibitor subunit 14B [Source:HGNC Symbol	6	Radial Glia
TTC3	8.04697e-09	-0.455765	0.632	0.571	0.000167289	tetratricopeptide repeat domain 3 [Source:HGNC Symbol	6	Radial Glia
SPARC	6.6908e-09	0.344347	0.548	0.356	0.000139095	secreted protein acidic and cysteine rich [Source:HGNC Symbol	6	Radial Glia
FXR1	6.52821e-09	-0.259952	0.596	0.508	0.000135715	FMR1 autosomal homolog 1 [Source:HGNC Symbol	6	Radial Glia
MTRNR2L12	6.39875e-09	-0.669005	0.751	0.707	0.000133024	MT-RNR2 like 12 [Source:HGNC Symbol	6	Radial Glia
ITM2C	6.35424e-09	0.254682	0.466	0.281	0.000132098	integral membrane protein 2C [Source:HGNC Symbol	6	Radial Glia
DUT	6.2696e-09	-0.314782	0.558	0.485	0.000130339	deoxyuridine triphosphatase [Source:HGNC Symbol	6	Radial Glia
HSD17B12	6.0277e-09	0.376582	0.356	0.184	0.00012531	hydroxysteroid 17-beta dehydrogenase 12 [Source:HGNC Symbol	6	Radial Glia
HMGB2	5.94115e-09	0.304315	0.811	0.639	0.000123511	high mobility group box 2 [Source:HGNC Symbol	6	Radial Glia
GGCT	4.83162e-09	0.348424	0.473	0.283	0.000100445	gamma-glutamylcyclotransferase [Source:HGNC Symbol	6	Radial Glia
HIST1H2AG	3.81413e-09	-0.578074	0.364	0.41	7.92919e-05	histone cluster 1 H2A family member g [Source:HGNC Symbol	6	Radial Glia
NRG1	3.79527e-09	0.265346	0.256	0.109	7.88998e-05	neuregulin 1 [Source:HGNC Symbol	6	Radial Glia
NDUFB1	3.73463e-09	-0.299521	0.572	0.508	7.76393e-05	NADH:ubiquinone oxidoreductase subunit B1 [Source:HGNC Symbol	6	Radial Glia
SMS	3.6649e-09	0.317752	0.565	0.37	7.61896e-05	spermine synthase [Source:HGNC Symbol	6	Radial Glia
YWHAZ	3.28845e-09	-0.356421	0.596	0.544	6.83637e-05	tyrosine 3-monooxygenase/tryptophan 5-monooxygenase activation protein zeta [Source:HGNC Symbol	6	Radial Glia
PPP1R1A	3.19365e-09	-0.390706	0.314	0.259	6.63929e-05	protein phosphatase 1 regulatory inhibitor subunit 1A [Source:HGNC Symbol	6	Radial Glia
DCXR	3.01648e-09	0.354267	0.641	0.447	6.27095e-05	dicarbonyl and L-xylulose reductase [Source:HGNC Symbol	6	Radial Glia
KDM1A	2.90159e-09	-0.383211	0.428	0.381	6.03212e-05	lysine demethylase 1A [Source:HGNC Symbol	6	Radial Glia
MLLT11	2.25391e-09	-0.733201	0.387	0.422	4.68566e-05	MLLT11 transcription factor 7 cofactor [Source:HGNC Symbol	6	Radial Glia
TMSB15A	2.11098e-09	-0.279411	0.672	0.624	4.38852e-05	thymosin beta 15a [Source:HGNC Symbol	6	Radial Glia
SPARCL1	2.11075e-09	0.277109	0.141	0.032	4.38804e-05	SPARC like 1 [Source:HGNC Symbol	6	Radial Glia
PFDN5	2.09659e-09	0.387738	0.801	0.66	4.3586e-05	prefoldin subunit 5 [Source:HGNC Symbol	6	Radial Glia
PLCD1	1.84664e-09	0.291819	0.179	0.054	3.83898e-05	phospholipase C delta 1 [Source:HGNC Symbol	6	Radial Glia
ASMTL	1.84342e-09	0.364115	0.332	0.161	3.83228e-05	acetylserotonin O-methyltransferase like [Source:HGNC Symbol	6	Radial Glia
STAT3	1.47839e-09	0.282848	0.338	0.175	3.07343e-05	signal transducer and activator of transcription 3 [Source:HGNC Symbol	6	Radial Glia
SFRP1	1.26534e-09	0.293187	0.316	0.15	2.63051e-05	secreted frizzled related protein 1 [Source:HGNC Symbol	6	Radial Glia
ATP5I	1.22366e-09	-0.281094	0.67	0.612	2.54386e-05	NA	6	Radial Glia
HIST1H1B	1.10198e-09	-0.493962	0.466	0.438	2.2909e-05	histone cluster 1 H1 family member b [Source:HGNC Symbol	6	Radial Glia
NPM1	1.0347e-09	0.354913	0.902	0.791	2.15104e-05	nucleophosmin 1 [Source:HGNC Symbol	6	Radial Glia
DRAXIN	8.116e-10	0.360048	0.586	0.383	1.68723e-05	dorsal inhibitory axon guidance protein [Source:HGNC Symbol	6	Radial Glia
GDF15	6.97565e-10	0.459204	0.211	0.07	1.45017e-05	growth differentiation factor 15 [Source:HGNC Symbol	6	Radial Glia
C12orf57	6.76365e-10	-0.286766	0.694	0.646	1.4061e-05	chromosome 12 open reading frame 57 [Source:HGNC Symbol	6	Radial Glia
CBX5	6.64864e-10	-0.317565	0.57	0.503	1.38219e-05	chromobox 5 [Source:HGNC Symbol	6	Radial Glia
GPM6B	6.24863e-10	0.36121	0.522	0.322	1.29903e-05	glycoprotein M6B [Source:HGNC Symbol	6	Radial Glia
RFX4	6.17825e-10	0.330835	0.436	0.243	1.2844e-05	regulatory factor X4 [Source:HGNC Symbol	6	Radial Glia
UBE2B	6.1676e-10	-0.356107	0.433	0.345	1.28218e-05	ubiquitin conjugating enzyme E2 B [Source:HGNC Symbol	6	Radial Glia
HNRNPU	5.99485e-10	-0.415839	0.636	0.585	1.24627e-05	heterogeneous nuclear ribonucleoprotein U [Source:HGNC Symbol	6	Radial Glia
MAGED2	5.64169e-10	0.417588	0.713	0.535	1.17285e-05	MAGE family member D2 [Source:HGNC Symbol	6	Radial Glia
CDKN1C	5.52284e-10	-0.824847	0.368	0.381	1.14814e-05	cyclin dependent kinase inhibitor 1C [Source:HGNC Symbol	6	Radial Glia
RARRES2	4.23973e-10	0.421951	0.485	0.286	8.81396e-06	retinoic acid receptor responder 2 [Source:HGNC Symbol	6	Radial Glia
SLC2A4RG	3.94504e-10	0.333212	0.473	0.272	8.20134e-06	SLC2A4 regulator [Source:HGNC Symbol	6	Radial Glia
RPL24	3.33475e-10	0.347998	0.962	0.909	6.93262e-06	ribosomal protein L24 [Source:HGNC Symbol	6	Radial Glia
BASP1	3.32057e-10	-0.486076	0.66	0.619	6.90314e-06	brain abundant membrane attached signal protein 1 [Source:HGNC Symbol	6	Radial Glia
NQO2	2.43154e-10	0.329967	0.412	0.218	5.05492e-06	N-ribosyldihydronicotinamide:quinone reductase 2 [Source:HGNC Symbol	6	Radial Glia
USP11	2.40468e-10	0.323943	0.548	0.34	4.99909e-06	ubiquitin specific peptidase 11 [Source:HGNC Symbol	6	Radial Glia
DDX5	1.70239e-10	-0.343929	0.778	0.728	3.53909e-06	DEAD-box helicase 5 [Source:HGNC Symbol	6	Radial Glia
ID2	1.47975e-10	-0.339144	0.455	0.324	3.07626e-06	inhibitor of DNA binding 2 [Source:HGNC Symbol	6	Radial Glia
IFITM2	1.05748e-10	0.454892	0.414	0.218	2.1984e-06	interferon induced transmembrane protein 2 [Source:HGNC Symbol	6	Radial Glia
ZIC2	1.03557e-10	0.268551	0.466	0.261	2.15284e-06	Zic family member 2 [Source:HGNC Symbol	6	Radial Glia
SNHG8	8.93049e-11	0.411851	0.531	0.32	1.85656e-06	small nucleolar RNA host gene 8 [Source:HGNC Symbol	6	Radial Glia
APOO	8.7152e-11	0.285548	0.478	0.272	1.8118e-06	apolipoprotein O [Source:HGNC Symbol	6	Radial Glia
PRDX6	8.69554e-11	0.44322	0.758	0.608	1.80772e-06	peroxiredoxin 6 [Source:HGNC Symbol	6	Radial Glia
QPRT	7.48599e-11	0.348011	0.54	0.327	1.55626e-06	quinolinate phosphoribosyltransferase [Source:HGNC Symbol	6	Radial Glia
GADD45B	6.09365e-11	-0.464961	0.278	0.172	1.26681e-06	growth arrest and DNA damage inducible beta [Source:HGNC Symbol	6	Radial Glia
CCNG1	5.78425e-11	0.397446	0.617	0.401	1.20249e-06	cyclin G1 [Source:HGNC Symbol	6	Radial Glia
MARCKS	5.70154e-11	-0.347748	0.856	0.8	1.18529e-06	myristoylated alanine rich protein kinase C substrate [Source:HGNC Symbol	6	Radial Glia
ZSCAN18	4.86457e-11	0.59107	0.447	0.245	1.01129e-06	zinc finger and SCAN domain containing 18 [Source:HGNC Symbol	6	Radial Glia
STMN1	4.24333e-11	-0.430586	0.861	0.837	8.82146e-07	stathmin 1 [Source:HGNC Symbol	6	Radial Glia
MT-CO3	2.84081e-11	0.592742	0.919	0.83	5.90576e-07	mitochondrially encoded cytochrome c oxidase III [Source:HGNC Symbol	6	Radial Glia
CD99	2.21705e-11	0.473401	0.576	0.37	4.60902e-07	CD99 molecule (Xg blood group) [Source:HGNC Symbol	6	Radial Glia
AES	1.6038e-11	-0.497593	0.368	0.422	3.33414e-07	NA	6	Radial Glia
CRABP1	1.4113e-11	-0.878534	0.701	0.726	2.93394e-07	cellular retinoic acid binding protein 1 [Source:HGNC Symbol	6	Radial Glia
RPS10	1.39815e-11	0.49918	0.787	0.644	2.90661e-07	ribosomal protein S10 [Source:HGNC Symbol	6	Radial Glia
CA14	1.13556e-11	0.530813	0.447	0.247	2.36072e-07	carbonic anhydrase 14 [Source:HGNC Symbol	6	Radial Glia
SLC43A2	6.31613e-12	0.303333	0.29	0.111	1.31306e-07	solute carrier family 43 member 2 [Source:HGNC Symbol	6	Radial Glia
SCUBE2	5.50288e-12	0.416663	0.332	0.141	1.14399e-07	signal peptide; CUB domain and EGF like domain containing 2 [Source:HGNC Symbol	6	Radial Glia
MORF4L2	5.03553e-12	0.473729	0.711	0.499	1.04684e-07	mortality factor 4 like 2 [Source:HGNC Symbol	6	Radial Glia
RPS9	2.97315e-12	0.378099	0.938	0.868	6.18088e-08	ribosomal protein S9 [Source:HGNC Symbol	6	Radial Glia
FGFBP3	2.45375e-12	0.440246	0.412	0.202	5.1011e-08	fibroblast growth factor binding protein 3 [Source:HGNC Symbol	6	Radial Glia
PRDX4	1.94622e-12	0.487984	0.653	0.474	4.046e-08	peroxiredoxin 4 [Source:HGNC Symbol	6	Radial Glia
PEG10	1.33788e-12	-0.668112	0.675	0.673	2.78133e-08	paternally expressed 10 [Source:HGNC Symbol	6	Radial Glia
GYPC	1.12321e-12	0.53525	0.631	0.406	2.33504e-08	glycophorin C (Gerbich blood group) [Source:HGNC Symbol	6	Radial Glia
CHCHD5	7.59584e-13	0.323758	0.509	0.279	1.5791e-08	coiled-coil-helix-coiled-coil-helix domain containing 5 [Source:HGNC Symbol	6	Radial Glia
LDHA	5.65444e-13	0.381941	0.481	0.254	1.1755e-08	lactate dehydrogenase A [Source:HGNC Symbol	6	Radial Glia
CCDC160	4.87569e-13	0.348717	0.302	0.113	1.01361e-08	coiled-coil domain containing 160 [Source:HGNC Symbol	6	Radial Glia
DNAJA1	1.00354e-13	-0.492315	0.747	0.723	2.08626e-09	DnaJ heat shock protein family (Hsp40) member A1 [Source:HGNC Symbol	6	Radial Glia
SET	9.87103e-14	-0.368833	0.768	0.735	2.05209e-09	SET nuclear proto-oncogene [Source:HGNC Symbol	6	Radial Glia
2007-09-01	9.53817e-14	-0.412666	0.694	0.639	1.98289e-09	NA	6	Radial Glia
EIF1AX	8.16298e-14	0.532393	0.751	0.537	1.697e-09	eukaryotic translation initiation factor 1A X-linked [Source:HGNC Symbol	6	Radial Glia
SLC25A6	7.77243e-14	0.523133	0.735	0.576	1.61581e-09	solute carrier family 25 member 6 [Source:HGNC Symbol	6	Radial Glia
RPL39L	5.22265e-14	0.263557	0.32	0.12	1.08574e-09	ribosomal protein L39 like [Source:HGNC Symbol	6	Radial Glia
ZNF682	4.88256e-14	0.300466	0.191	0.039	1.01503e-09	zinc finger protein 682 [Source:HGNC Symbol	6	Radial Glia
SAT1	1.02126e-14	0.414658	0.519	0.272	2.12309e-10	spermidine/spermine N1-acetyltransferase 1 [Source:HGNC Symbol	6	Radial Glia
HIST1H3B	9.29563e-15	-0.606187	0.388	0.383	1.93247e-10	histone cluster 1 H3 family member b [Source:HGNC Symbol	6	Radial Glia
TFPI2	3.43423e-15	0.722156	0.253	0.07	7.13942e-11	tissue factor pathway inhibitor 2 [Source:HGNC Symbol	6	Radial Glia
DUSP15	2.15544e-15	0.374766	0.325	0.113	4.48095e-11	dual specificity phosphatase 15 [Source:HGNC Symbol	6	Radial Glia
CRABP2	1.3318e-15	0.341499	0.581	0.322	2.76869e-11	cellular retinoic acid binding protein 2 [Source:HGNC Symbol	6	Radial Glia
PCLO	1.08414e-15	0.733751	0.376	0.147	2.25382e-11	piccolo presynaptic cytomatrix protein [Source:HGNC Symbol	6	Radial Glia
7SK,2	1.07438e-15	-2.06462	0.503	0.635	2.23353e-11	NA	6	Radial Glia
MAB21L1	1.01276e-15	-0.841505	0.041	0.202	2.10542e-11	mab-21 like 1 [Source:HGNC Symbol	6	Radial Glia
HOXA7	9.40498e-16	0.381509	0.266	0.073	1.9552e-11	homeobox A7 [Source:HGNC Symbol	6	Radial Glia
EIF2S3	8.11108e-16	0.525209	0.6	0.345	1.68621e-11	eukaryotic translation initiation factor 2 subunit gamma [Source:HGNC Symbol	6	Radial Glia
SOX4	7.70874e-16	-0.94511	0.696	0.678	1.60257e-11	SRY-box transcription factor 4 [Source:HGNC Symbol	6	Radial Glia
GPC3	4.60913e-16	0.592181	0.486	0.234	9.58192e-12	glypican 3 [Source:HGNC Symbol	6	Radial Glia
NGFRAP1	2.12602e-16	0.512872	0.864	0.73	4.41979e-12	NA	6	Radial Glia
HIST1H3D	2.10786e-16	-0.867955	0.423	0.42	4.38203e-12	histone cluster 1 H3 family member d [Source:HGNC Symbol	6	Radial Glia
SNCG	2.02154e-16	0.364242	0.371	0.143	4.20258e-12	synuclein gamma [Source:HGNC Symbol	6	Radial Glia
NUDT16	1.11734e-16	0.35344	0.361	0.132	2.32285e-12	nudix hydrolase 16 [Source:HGNC Symbol	6	Radial Glia
RPL3	5.52372e-17	0.466634	0.973	0.932	1.14833e-12	ribosomal protein L3 [Source:HGNC Symbol	6	Radial Glia
LINC00473	5.40626e-17	0.528504	0.287	0.079	1.12391e-12	NA	6	Radial Glia
RPS6	1.17824e-17	0.481939	0.967	0.934	2.44944e-13	ribosomal protein S6 [Source:HGNC Symbol	6	Radial Glia
MEIS2	1.37383e-18	-1.06709	0.242	0.413	2.85605e-14	Meis homeobox 2 [Source:HGNC Symbol	6	Radial Glia
RPS18	1.71947e-19	0.492635	0.986	0.934	3.5746e-15	ribosomal protein S18 [Source:HGNC Symbol	6	Radial Glia
TMBIM4,1	1.3512e-19	0.377227	0.289	0.068	2.809e-15	NA	6	Radial Glia
EDNRB	1.0021e-19	0.471922	0.328	0.093	2.08326e-15	endothelin receptor type B [Source:HGNC Symbol	6	Radial Glia
HOXA9	3.75119e-20	0.551859	0.326	0.088	7.79835e-16	homeobox A9 [Source:HGNC Symbol	6	Radial Glia
C1orf54	1.74841e-20	0.627562	0.541	0.254	3.63476e-16	chromosome 1 open reading frame 54 [Source:HGNC Symbol	6	Radial Glia
SLC44A2	3.50556e-21	0.480736	0.481	0.195	7.28771e-17	solute carrier family 44 member 2 [Source:HGNC Symbol	6	Radial Glia
BTF3	1.68261e-21	0.674579	0.799	0.639	3.49797e-17	basic transcription factor 3 [Source:HGNC Symbol	6	Radial Glia
CHCHD2	3.56527e-24	-0.705831	0.665	0.689	7.41185e-20	coiled-coil-helix-coiled-coil-helix domain containing 2 [Source:HGNC Symbol	6	Radial Glia
TMEM47	6.78116e-28	0.857808	0.536	0.213	1.40973e-23	transmembrane protein 47 [Source:HGNC Symbol	6	Radial Glia
DLK1	2.12122e-32	1.39361	0.866	0.615	4.40981e-28	delta like non-canonical Notch ligand 1 [Source:HGNC Symbol	6	Radial Glia
WLS	2.23604e-06	-0.310096	0.854	0.92	0.0464851	Wnt ligand secretion mediator [Source:HGNC Symbol	5	Radial Glia
COL4A6	2.05664e-06	0.29787	0.855	0.756	0.0427554	collagen type IV alpha 6 chain [Source:HGNC Symbol	5	Radial Glia
STAG2	1.9383e-06	0.251513	0.632	0.51	0.0402953	stromal antigen 2 [Source:HGNC Symbol	5	Radial Glia
LINC01158	1.58412e-06	-0.336321	0.424	0.478	0.0329324	NA	5	Radial Glia
CANX	1.19665e-06	0.297165	0.903	0.853	0.0248771	calnexin [Source:HGNC Symbol	5	Radial Glia
SOCS3	1.12236e-06	0.261716	0.523	0.377	0.0233327	suppressor of cytokine signaling 3 [Source:HGNC Symbol	5	Radial Glia
ZFAND5	9.20902e-07	-0.259805	0.563	0.66	0.0191446	zinc finger AN1-type containing 5 [Source:HGNC Symbol	5	Radial Glia
RAB4A	8.5929e-07	-0.25157	0.452	0.563	0.0178638	RAB4A; member RAS oncogene family [Source:HGNC Symbol	5	Radial Glia
FLNA	7.54861e-07	-0.256534	0.437	0.56	0.0156928	filamin A [Source:HGNC Symbol	5	Radial Glia
HNRNPU	7.20488e-07	-0.273611	0.834	0.886	0.0149782	heterogeneous nuclear ribonucleoprotein U [Source:HGNC Symbol	5	Radial Glia
NLRP1	6.8179e-07	-0.433826	0.824	0.836	0.0141737	NLR family pyrin domain containing 1 [Source:HGNC Symbol	5	Radial Glia
AP1S2	6.67388e-07	0.263174	0.563	0.423	0.0138743	adaptor related protein complex 1 subunit sigma 2 [Source:HGNC Symbol	5	Radial Glia
LIN7A	6.52442e-07	-0.260213	0.202	0.32	0.0135636	lin-7 homolog A; crumbs cell polarity complex component [Source:HGNC Symbol	5	Radial Glia
CLU	5.07203e-07	0.451856	0.887	0.827	0.0105442	clusterin [Source:HGNC Symbol	5	Radial Glia
APCDD1	4.44745e-07	0.401238	0.776	0.651	0.00924581	APC down-regulated 1 [Source:HGNC Symbol	5	Radial Glia
HIST1H1C	4.29421e-07	-0.391735	0.249	0.36	0.00892724	histone cluster 1 H1 family member c [Source:HGNC Symbol	5	Radial Glia
OTX2	4.16851e-07	-0.266733	0.514	0.64	0.00866592	orthodenticle homeobox 2 [Source:HGNC Symbol	5	Radial Glia
IER3	3.67446e-07	-0.416506	0.25	0.368	0.00763884	immediate early response 3 [Source:HGNC Symbol	5	Radial Glia
SOX4	3.56023e-07	-0.32114	0.8	0.821	0.00740136	SRY-box transcription factor 4 [Source:HGNC Symbol	5	Radial Glia
RBP1	3.37818e-07	-0.458095	0.336	0.454	0.0070229	retinol binding protein 1 [Source:HGNC Symbol	5	Radial Glia
HDAC2	3.22583e-07	-0.251502	0.743	0.794	0.00670619	histone deacetylase 2 [Source:HGNC Symbol	5	Radial Glia
DDAH2	3.11076e-07	-0.253584	0.892	0.932	0.00646696	dimethylarginine dimethylaminohydrolase 2 [Source:HGNC Symbol	5	Radial Glia
CYR61	2.50248e-07	-0.31419	0.304	0.437	0.0052024	NA	5	Radial Glia
NFIA	2.398e-07	-0.31746	0.467	0.607	0.0049852	nuclear factor I A [Source:HGNC Symbol	5	Radial Glia
MAB21L2	2.02433e-07	-0.264377	0.249	0.376	0.00420838	mab-21 like 2 [Source:HGNC Symbol	5	Radial Glia
CADM1	1.8447e-07	0.256911	0.55	0.399	0.00383494	cell adhesion molecule 1 [Source:HGNC Symbol	5	Radial Glia
YWHAZ	1.64743e-07	-0.257757	0.882	0.929	0.00342484	tyrosine 3-monooxygenase/tryptophan 5-monooxygenase activation protein zeta [Source:HGNC Symbol	5	Radial Glia
FKBP3	1.25947e-07	-0.267346	0.834	0.889	0.00261832	FKBP prolyl isomerase 3 [Source:HGNC Symbol	5	Radial Glia
CALD1	1.17064e-07	-0.291666	0.721	0.816	0.00243364	caldesmon 1 [Source:HGNC Symbol	5	Radial Glia
GAS1	1.05004e-07	-0.298783	0.442	0.569	0.00218292	growth arrest specific 1 [Source:HGNC Symbol	5	Radial Glia
MLLT4	1.03322e-07	-0.293478	0.674	0.75	0.00214797	NA	5	Radial Glia
TUBB	9.7505e-08	-0.271142	0.973	0.986	0.00202703	tubulin beta class I [Source:HGNC Symbol	5	Radial Glia
FBXL17	9.6436e-08	-0.263665	0.145	0.253	0.00200481	F-box and leucine rich repeat protein 17 [Source:HGNC Symbol	5	Radial Glia
SPTAN1	9.08109e-08	-0.275468	0.471	0.587	0.00188787	spectrin alpha; non-erythrocytic 1 [Source:HGNC Symbol	5	Radial Glia
NSRP1	8.79632e-08	-0.26033	0.492	0.594	0.00182867	nuclear speckle splicing regulatory protein 1 [Source:HGNC Symbol	5	Radial Glia
NDUFB1	8.69203e-08	-0.269738	0.844	0.892	0.00180699	NADH:ubiquinone oxidoreductase subunit B1 [Source:HGNC Symbol	5	Radial Glia
FDPS	8.01843e-08	-0.3484	0.743	0.794	0.00166695	farnesyl diphosphate synthase [Source:HGNC Symbol	5	Radial Glia
SLC3A2	7.62811e-08	0.316366	0.813	0.739	0.00158581	solute carrier family 3 member 2 [Source:HGNC Symbol	5	Radial Glia
CTGF	7.31832e-08	-0.51747	0.442	0.556	0.0015214	NA	5	Radial Glia
SMARCA1	7.16815e-08	0.285757	0.736	0.631	0.00149019	SWI/SNF related; matrix associated; actin dependent regulator of chromatin; subfamily a; member 1 [Source:HGNC Symbol	5	Radial Glia
CLYBL	6.74159e-08	-0.277694	0.424	0.538	0.00140151	citrate lyase beta like [Source:HGNC Symbol	5	Radial Glia
CCL2	6.10649e-08	-0.389848	0.094	0.192	0.00126948	C-C motif chemokine ligand 2 [Source:HGNC Symbol	5	Radial Glia
SERPINE2	5.69322e-08	-0.334375	0.235	0.331	0.00118356	serpin family E member 2 [Source:HGNC Symbol	5	Radial Glia
ASCL1	5.1393e-08	-0.404228	0.168	0.284	0.00106841	achaete-scute family bHLH transcription factor 1 [Source:HGNC Symbol	5	Radial Glia
METAP2	5.04273e-08	-0.258209	0.755	0.808	0.00104833	methionyl aminopeptidase 2 [Source:HGNC Symbol	5	Radial Glia
NMU	4.96589e-08	0.366993	0.543	0.385	0.00103236	neuromedin U [Source:HGNC Symbol	5	Radial Glia
FADS1	4.81283e-08	-0.277568	0.442	0.549	0.00100054	fatty acid desaturase 1 [Source:HGNC Symbol	5	Radial Glia
CHCHD10	4.7459e-08	0.275531	0.761	0.632	0.000986625	coiled-coil-helix-coiled-coil-helix domain containing 10 [Source:HGNC Symbol	5	Radial Glia
ID3	4.2841e-08	-0.45831	0.8	0.867	0.000890621	inhibitor of DNA binding 3; HLH protein [Source:HGNC Symbol	5	Radial Glia
TXLNG	4.25687e-08	0.263293	0.445	0.306	0.000884961	taxilin gamma [Source:HGNC Symbol	5	Radial Glia
ATP1A2	4.10953e-08	-0.315489	0.274	0.427	0.000854329	ATPase Na+/K+ transporting subunit alpha 2 [Source:HGNC Symbol	5	Radial Glia
HES4	4.06971e-08	-0.342813	0.928	0.938	0.000846053	hes family bHLH transcription factor 4 [Source:HGNC Symbol	5	Radial Glia
DDR1	3.62871e-08	0.325907	0.655	0.527	0.000754372	discoidin domain receptor tyrosine kinase 1 [Source:HGNC Symbol	5	Radial Glia
SPARCL1	3.20852e-08	0.40074	0.487	0.325	0.00066702	SPARC like 1 [Source:HGNC Symbol	5	Radial Glia
BAMBI	2.99376e-08	-0.38798	0.158	0.283	0.000622373	BMP and activin membrane bound inhibitor [Source:HGNC Symbol	5	Radial Glia
MAFB	2.7634e-08	-0.353616	0.215	0.331	0.000574483	MAF bZIP transcription factor B [Source:HGNC Symbol	5	Radial Glia
MT-CO2	2.65091e-08	0.257827	0.99	0.98	0.000551097	mitochondrially encoded cytochrome c oxidase II [Source:HGNC Symbol	5	Radial Glia
GDF10	2.49903e-08	0.472763	0.321	0.19	0.000519524	growth differentiation factor 10 [Source:HGNC Symbol	5	Radial Glia
LMO4	2.45066e-08	-0.286855	0.503	0.607	0.000509469	LIM domain only 4 [Source:HGNC Symbol	5	Radial Glia
HES6	2.1059e-08	-0.502111	0.287	0.403	0.000437795	hes family bHLH transcription factor 6 [Source:HGNC Symbol	5	Radial Glia
H1F0	1.96702e-08	-0.250551	0.134	0.252	0.000408924	H1 histone family member 0 [Source:HGNC Symbol	5	Radial Glia
TMOD3	1.80323e-08	-0.271282	0.529	0.64	0.000374874	tropomodulin 3 [Source:HGNC Symbol	5	Radial Glia
PITPNC1	1.77345e-08	-0.302538	0.445	0.587	0.000368682	phosphatidylinositol transfer protein cytoplasmic 1 [Source:HGNC Symbol	5	Radial Glia
AK1	1.69696e-08	-0.321985	0.508	0.615	0.00035278	adenylate kinase 1 [Source:HGNC Symbol	5	Radial Glia
SQLE	1.57067e-08	-0.328977	0.697	0.757	0.000326526	squalene epoxidase [Source:HGNC Symbol	5	Radial Glia
TERF2IP	1.46986e-08	-0.250758	0.798	0.849	0.00030557	TERF2 interacting protein [Source:HGNC Symbol	5	Radial Glia
SERTAD1	1.32294e-08	-0.280693	0.439	0.543	0.000275026	SERTA domain containing 1 [Source:HGNC Symbol	5	Radial Glia
SOX9	1.2611e-08	-0.250733	0.203	0.338	0.000262169	SRY-box transcription factor 9 [Source:HGNC Symbol	5	Radial Glia
HNRNPD	1.14404e-08	-0.27621	0.876	0.896	0.000237835	heterogeneous nuclear ribonucleoprotein D [Source:HGNC Symbol	5	Radial Glia
WASF1	1.06264e-08	-0.336173	0.323	0.445	0.000220912	WASP family member 1 [Source:HGNC Symbol	5	Radial Glia
CGGBP1	1.02894e-08	-0.264739	0.457	0.569	0.000213906	CGG triplet repeat binding protein 1 [Source:HGNC Symbol	5	Radial Glia
ZNF462	1.00777e-08	0.293369	0.533	0.397	0.000209506	zinc finger protein 462 [Source:HGNC Symbol	5	Radial Glia
ZNF385D	9.60837e-09	-0.261598	0.277	0.44	0.000199748	zinc finger protein 385D [Source:HGNC Symbol	5	Radial Glia
CMBL	8.92313e-09	0.287224	0.608	0.507	0.000185503	carboxymethylenebutenolidase homolog [Source:HGNC Symbol	5	Radial Glia
RABAC1	8.86312e-09	0.250025	0.948	0.93	0.000184255	Rab acceptor 1 [Source:HGNC Symbol	5	Radial Glia
JAM2	7.59765e-09	-0.290112	0.523	0.626	0.000157948	junctional adhesion molecule 2 [Source:HGNC Symbol	5	Radial Glia
TMEM2	7.08262e-09	-0.273372	0.373	0.522	0.000147241	NA	5	Radial Glia
HP1BP3	6.55145e-09	-0.290806	0.713	0.801	0.000136198	heterochromatin protein 1 binding protein 3 [Source:HGNC Symbol	5	Radial Glia
EGR1	5.87262e-09	-0.280215	0.383	0.541	0.000122086	early growth response 1 [Source:HGNC Symbol	5	Radial Glia
HNRNPA3	5.85178e-09	-0.302714	0.901	0.929	0.000121653	heterogeneous nuclear ribonucleoprotein A3 [Source:HGNC Symbol	5	Radial Glia
ANK2	5.26169e-09	-0.347792	0.422	0.578	0.000109385	ankyrin 2 [Source:HGNC Symbol	5	Radial Glia
PPP1R10	5.18832e-09	-0.269535	0.587	0.662	0.00010786	protein phosphatase 1 regulatory subunit 10 [Source:HGNC Symbol	5	Radial Glia
CEP112	5.08052e-09	-0.26078	0.143	0.258	0.000105619	centrosomal protein 112 [Source:HGNC Symbol	5	Radial Glia
RRP15	4.30327e-09	-0.274403	0.356	0.451	8.94607e-05	ribosomal RNA processing 15 homolog [Source:HGNC Symbol	5	Radial Glia
HS6ST1	3.98525e-09	0.281835	0.487	0.326	8.28494e-05	heparan sulfate 6-O-sulfotransferase 1 [Source:HGNC Symbol	5	Radial Glia
TFDP2	3.77822e-09	-0.304214	0.607	0.662	7.85454e-05	transcription factor Dp-2 [Source:HGNC Symbol	5	Radial Glia
FOSB	3.28417e-09	-0.348478	0.366	0.495	6.82746e-05	FosB proto-oncogene; AP-1 transcription factor subunit [Source:HGNC Symbol	5	Radial Glia
TRA2B	3.12375e-09	-0.289015	0.694	0.764	6.49396e-05	transformer 2 beta homolog [Source:HGNC Symbol	5	Radial Glia
NR2F1	2.94985e-09	-0.370241	0.341	0.448	6.13245e-05	nuclear receptor subfamily 2 group F member 1 [Source:HGNC Symbol	5	Radial Glia
TCEAL1	2.36001e-09	0.2712	0.422	0.27	4.90623e-05	transcription elongation factor A like 1 [Source:HGNC Symbol	5	Radial Glia
SEMA6A	2.01917e-09	-0.311303	0.297	0.448	4.19765e-05	semaphorin 6A [Source:HGNC Symbol	5	Radial Glia
PRPS1	1.87568e-09	0.264915	0.37	0.223	3.89934e-05	phosphoribosyl pyrophosphate synthetase 1 [Source:HGNC Symbol	5	Radial Glia
ARID5B	1.559e-09	-0.304365	0.326	0.473	3.241e-05	AT-rich interaction domain 5B [Source:HGNC Symbol	5	Radial Glia
USP9X	1.33793e-09	0.307689	0.541	0.402	2.78143e-05	ubiquitin specific peptidase 9 X-linked [Source:HGNC Symbol	5	Radial Glia
RPE65	1.15867e-09	-0.273113	0.069	0.165	2.40876e-05	retinoid isomerohydrolase RPE65 [Source:HGNC Symbol	5	Radial Glia
CNN3	1.13539e-09	-0.304678	0.842	0.864	2.36037e-05	calponin 3 [Source:HGNC Symbol	5	Radial Glia
MRPL3	9.61306e-10	0.295616	0.624	0.465	1.99846e-05	mitochondrial ribosomal protein L3 [Source:HGNC Symbol	5	Radial Glia
H2AFZ	8.88876e-10	-0.338753	0.961	0.985	1.84788e-05	H2A histone family member Z [Source:HGNC Symbol	5	Radial Glia
GTF2I	8.6222e-10	-0.273721	0.832	0.884	1.79247e-05	general transcription factor IIi [Source:HGNC Symbol	5	Radial Glia
SDCBP	7.58686e-10	-0.339577	0.676	0.76	1.57723e-05	syndecan binding protein [Source:HGNC Symbol	5	Radial Glia
ZNF106	7.13163e-10	-0.308835	0.506	0.611	1.48259e-05	zinc finger protein 106 [Source:HGNC Symbol	5	Radial Glia
SNRPE	6.92227e-10	-0.272115	0.891	0.951	1.43907e-05	small nuclear ribonucleoprotein polypeptide E [Source:HGNC Symbol	5	Radial Glia
NCKAP5	6.77549e-10	-0.415608	0.395	0.521	1.40856e-05	NCK associated protein 5 [Source:HGNC Symbol	5	Radial Glia
ACAT2	6.74058e-10	-0.426574	0.434	0.558	1.4013e-05	acetyl-CoA acetyltransferase 2 [Source:HGNC Symbol	5	Radial Glia
MLLT11	6.68459e-10	-0.303176	0.524	0.641	1.38966e-05	MLLT11 transcription factor 7 cofactor [Source:HGNC Symbol	5	Radial Glia
RPL22L1	6.56786e-10	0.30546	0.818	0.76	1.36539e-05	ribosomal protein L22 like 1 [Source:HGNC Symbol	5	Radial Glia
GSN	6.3973e-10	0.284843	0.461	0.284	1.32993e-05	gelsolin [Source:HGNC Symbol	5	Radial Glia
MYL6	6.00976e-10	-0.267664	0.992	0.994	1.24937e-05	myosin light chain 6 [Source:HGNC Symbol	5	Radial Glia
NDFIP2	5.15302e-10	-0.343026	0.21	0.348	1.07126e-05	Nedd4 family interacting protein 2 [Source:HGNC Symbol	5	Radial Glia
PTPRO	4.55828e-10	-0.356155	0.133	0.257	9.47621e-06	protein tyrosine phosphatase receptor type O [Source:HGNC Symbol	5	Radial Glia
SYNC	4.47843e-10	-0.266799	0.328	0.487	9.31022e-06	syncoilin; intermediate filament protein [Source:HGNC Symbol	5	Radial Glia
NQO2	4.39255e-10	0.276378	0.461	0.284	9.13167e-06	N-ribosyldihydronicotinamide:quinone reductase 2 [Source:HGNC Symbol	5	Radial Glia
SPG20	4.27147e-10	-0.311493	0.598	0.733	8.87996e-06	NA	5	Radial Glia
RBMX2	3.81699e-10	0.287221	0.669	0.539	7.93513e-06	RNA binding motif protein X-linked 2 [Source:HGNC Symbol	5	Radial Glia
SNX6	3.61963e-10	-0.280737	0.738	0.827	7.52485e-06	sorting nexin 6 [Source:HGNC Symbol	5	Radial Glia
ZFHX4	3.28735e-10	-0.384526	0.768	0.858	6.83408e-06	zinc finger homeobox 4 [Source:HGNC Symbol	5	Radial Glia
HIST1H3D	2.67048e-10	-0.345176	0.116	0.249	5.55166e-06	histone cluster 1 H3 family member d [Source:HGNC Symbol	5	Radial Glia
BOC	2.07906e-10	-0.36051	0.477	0.595	4.32215e-06	BOC cell adhesion associated; oncogene regulated [Source:HGNC Symbol	5	Radial Glia
IDI1	1.96413e-10	-0.387368	0.548	0.68	4.08322e-06	isopentenyl-diphosphate delta isomerase 1 [Source:HGNC Symbol	5	Radial Glia
HMGCS1	1.8863e-10	-0.449685	0.509	0.648	3.92143e-06	3-hydroxy-3-methylglutaryl-CoA synthase 1 [Source:HGNC Symbol	5	Radial Glia
ARRDC3	1.85413e-10	0.288058	0.546	0.365	3.85454e-06	arrestin domain containing 3 [Source:HGNC Symbol	5	Radial Glia
BCKDHB	1.78365e-10	-0.295575	0.494	0.674	3.70802e-06	branched chain keto acid dehydrogenase E1 subunit beta [Source:HGNC Symbol	5	Radial Glia
WNT10B	1.6993e-10	-0.297989	0.133	0.281	3.53267e-06	Wnt family member 10B [Source:HGNC Symbol	5	Radial Glia
OCIAD2	1.68079e-10	0.331751	0.432	0.253	3.4942e-06	OCIA domain containing 2 [Source:HGNC Symbol	5	Radial Glia
PSMD10	1.65756e-10	0.290568	0.576	0.405	3.44589e-06	proteasome 26S subunit; non-ATPase 10 [Source:HGNC Symbol	5	Radial Glia
NTRK2	1.63942e-10	-0.412889	0.583	0.696	3.40819e-06	neurotrophic receptor tyrosine kinase 2 [Source:HGNC Symbol	5	Radial Glia
FAM133B	1.50392e-10	-0.316739	0.655	0.743	3.1265e-06	family with sequence similarity 133 member B [Source:HGNC Symbol	5	Radial Glia
C12orf57	1.47469e-10	-0.279664	0.882	0.937	3.06573e-06	chromosome 12 open reading frame 57 [Source:HGNC Symbol	5	Radial Glia
FDFT1	1.42697e-10	-0.398897	0.59	0.669	2.96653e-06	farnesyl-diphosphate farnesyltransferase 1 [Source:HGNC Symbol	5	Radial Glia
FDFT1	1.42697e-10	-0.398897	0.59	0.669	2.96653e-06	farnesyl-diphosphate farnesyltransferase 1 [Source:NCBI gene	5	Radial Glia
SCG5	1.38527e-10	0.381798	0.35	0.206	2.87983e-06	secretogranin V [Source:HGNC Symbol	5	Radial Glia
CACHD1	1.37934e-10	-0.308605	0.615	0.757	2.86751e-06	cache domain containing 1 [Source:HGNC Symbol	5	Radial Glia
EPHA7	1.36555e-10	0.261922	0.15	0.045	2.83885e-06	EPH receptor A7 [Source:HGNC Symbol	5	Radial Glia
ZNF711	1.36253e-10	-0.314817	0.387	0.556	2.83257e-06	zinc finger protein 711 [Source:HGNC Symbol	5	Radial Glia
SRSF3	1.20558e-10	-0.283583	0.913	0.955	2.50628e-06	serine and arginine rich splicing factor 3 [Source:HGNC Symbol	5	Radial Glia
MEST	1.1695e-10	0.36575	0.805	0.702	2.43128e-06	mesoderm specific transcript [Source:HGNC Symbol	5	Radial Glia
COL4A5	1.05718e-10	0.385414	0.773	0.645	2.19777e-06	collagen type IV alpha 5 chain [Source:HGNC Symbol	5	Radial Glia
IP6K2	1.00037e-10	-0.317875	0.563	0.677	2.07967e-06	inositol hexakisphosphate kinase 2 [Source:HGNC Symbol	5	Radial Glia
CD55	9.88527e-11	-0.300223	0.133	0.27	2.05505e-06	CD55 molecule (Cromer blood group) [Source:HGNC Symbol	5	Radial Glia
RSPO3	7.78383e-11	-0.681963	0.459	0.532	1.61818e-06	R-spondin 3 [Source:HGNC Symbol	5	Radial Glia
CDK6	7.77696e-11	-0.35011	0.355	0.533	1.61675e-06	cyclin dependent kinase 6 [Source:HGNC Symbol	5	Radial Glia
KIT	6.75245e-11	-0.268817	0.039	0.144	1.40377e-06	KIT proto-oncogene; receptor tyrosine kinase [Source:HGNC Symbol	5	Radial Glia
CRABP2	5.67068e-11	0.341617	0.474	0.308	1.17888e-06	cellular retinoic acid binding protein 2 [Source:HGNC Symbol	5	Radial Glia
OPN3	5.63336e-11	-0.313358	0.346	0.504	1.17112e-06	opsin 3 [Source:HGNC Symbol	5	Radial Glia
GUK1	5.59499e-11	0.256126	0.919	0.896	1.16314e-06	guanylate kinase 1 [Source:HGNC Symbol	5	Radial Glia
PXMP2	5.54896e-11	-0.282549	0.262	0.428	1.15357e-06	peroxisomal membrane protein 2 [Source:HGNC Symbol	5	Radial Glia
RAB11FIP1	4.78504e-11	-0.339462	0.259	0.386	9.94762e-07	RAB11 family interacting protein 1 [Source:HGNC Symbol	5	Radial Glia
CCNG1	4.50153e-11	0.309649	0.788	0.723	9.35824e-07	cyclin G1 [Source:HGNC Symbol	5	Radial Glia
PCSK1N	3.19213e-11	0.40388	0.79	0.631	6.63611e-07	proprotein convertase subtilisin/kexin type 1 inhibitor [Source:HGNC Symbol	5	Radial Glia
SPAG9	1.56527e-11	-0.334248	0.634	0.773	3.25405e-07	sperm associated antigen 9 [Source:HGNC Symbol	5	Radial Glia
ATP6V1H	1.40595e-11	0.267153	0.429	0.246	2.92283e-07	ATPase H+ transporting V1 subunit H [Source:HGNC Symbol	5	Radial Glia
HIST1H4C	1.3106e-11	-0.532576	0.776	0.866	2.72461e-07	histone cluster 1 H4 family member c [Source:HGNC Symbol	5	Radial Glia
EIF4A2	1.19705e-11	-0.302144	0.939	0.961	2.48855e-07	eukaryotic translation initiation factor 4A2 [Source:HGNC Symbol	5	Radial Glia
CDK16	1.16478e-11	0.300937	0.583	0.403	2.42146e-07	cyclin dependent kinase 16 [Source:HGNC Symbol	5	Radial Glia
ATP1B3	1.10889e-11	0.345557	0.792	0.714	2.30528e-07	ATPase Na+/K+ transporting subunit beta 3 [Source:HGNC Symbol	5	Radial Glia
DBI	1.03889e-11	-0.338956	0.766	0.867	2.15975e-07	diazepam binding inhibitor; acyl-CoA binding protein [Source:HGNC Symbol	5	Radial Glia
NDUFB4	9.83696e-12	-0.348837	0.862	0.923	2.04501e-07	NADH:ubiquinone oxidoreductase subunit B4 [Source:HGNC Symbol	5	Radial Glia
HMGN5	7.67533e-12	-0.300846	0.16	0.3	1.59562e-07	high mobility group nucleosome binding domain 5 [Source:HGNC Symbol	5	Radial Glia
CTSL	7.63873e-12	0.344372	0.684	0.516	1.58802e-07	cathepsin L [Source:HGNC Symbol	5	Radial Glia
SEPP1	6.56926e-12	-0.369066	0.244	0.406	1.36568e-07	NA	5	Radial Glia
YBX1	5.50566e-12	-0.265365	0.987	0.994	1.14457e-07	Y-box binding protein 1 [Source:HGNC Symbol	5	Radial Glia
NFIB	5.11942e-12	-0.362999	0.37	0.539	1.06428e-07	nuclear factor I B [Source:HGNC Symbol	5	Radial Glia
EIF3J	4.79409e-12	-0.32311	0.647	0.782	9.96643e-08	eukaryotic translation initiation factor 3 subunit J [Source:HGNC Symbol	5	Radial Glia
ATF3	3.93572e-12	-0.5162	0.316	0.454	8.18197e-08	activating transcription factor 3 [Source:HGNC Symbol	5	Radial Glia
LRRC17	3.73729e-12	-0.330641	0.166	0.343	7.76946e-08	leucine rich repeat containing 17 [Source:HGNC Symbol	5	Radial Glia
DUT	3.14136e-12	-0.346576	0.763	0.866	6.53058e-08	deoxyuridine triphosphatase [Source:HGNC Symbol	5	Radial Glia
TMPO	2.02074e-12	-0.355253	0.55	0.677	4.20091e-08	thymopoietin [Source:HGNC Symbol	5	Radial Glia
NREP	1.98118e-12	-0.341562	0.77	0.872	4.11867e-08	neuronal regeneration related protein [Source:HGNC Symbol	5	Radial Glia
FAT1	1.92817e-12	-0.404926	0.518	0.671	4.00847e-08	FAT atypical cadherin 1 [Source:HGNC Symbol	5	Radial Glia
TCEAL3	1.63665e-12	0.364654	0.718	0.569	3.40243e-08	transcription elongation factor A like 3 [Source:HGNC Symbol	5	Radial Glia
RPL7	1.35224e-12	0.279416	1	0.998	2.81117e-08	ribosomal protein L7 [Source:HGNC Symbol	5	Radial Glia
TMSB15A	1.32417e-12	-0.467757	0.613	0.728	2.75282e-08	thymosin beta 15a [Source:HGNC Symbol	5	Radial Glia
DDX5	1.2706e-12	-0.293599	0.965	0.983	2.64145e-08	DEAD-box helicase 5 [Source:HGNC Symbol	5	Radial Glia
DDX17	1.15637e-12	-0.364323	0.83	0.904	2.40398e-08	DEAD-box helicase 17 [Source:HGNC Symbol	5	Radial Glia
ATP5I	1.12537e-12	-0.283325	0.929	0.958	2.33952e-08	NA	5	Radial Glia
COMMD3	9.88122e-13	-0.312425	0.279	0.454	2.05421e-08	COMM domain containing 3 [Source:HGNC Symbol	5	Radial Glia
EIF5	9.27496e-13	-0.295497	0.871	0.904	1.92817e-08	eukaryotic translation initiation factor 5 [Source:HGNC Symbol	5	Radial Glia
MASP1	8.79819e-13	-0.543886	0.329	0.504	1.82906e-08	mannan binding lectin serine peptidase 1 [Source:HGNC Symbol	5	Radial Glia
DEK	8.53487e-13	-0.469256	0.761	0.852	1.77431e-08	DEK proto-oncogene [Source:HGNC Symbol	5	Radial Glia
XIAP	7.91012e-13	0.339524	0.541	0.362	1.64443e-08	X-linked inhibitor of apoptosis [Source:HGNC Symbol	5	Radial Glia
NENF	6.95293e-13	0.365328	0.662	0.474	1.44544e-08	neudesin neurotrophic factor [Source:HGNC Symbol	5	Radial Glia
PAPSS2	6.68161e-13	0.323975	0.212	0.074	1.38904e-08	3'-phosphoadenosine 5'-phosphosulfate synthase 2 [Source:HGNC Symbol	5	Radial Glia
HMGB1	6.12798e-13	-0.323981	0.988	0.997	1.27395e-08	high mobility group box 1 [Source:HGNC Symbol	5	Radial Glia
IMPDH2	4.25998e-13	-0.332829	0.694	0.785	8.85607e-09	inosine monophosphate dehydrogenase 2 [Source:HGNC Symbol	5	Radial Glia
CLN5	3.16774e-13	0.332604	0.469	0.272	6.58542e-09	CLN5 intracellular trafficking protein [Source:HGNC Symbol	5	Radial Glia
2007-09-01	2.82493e-13	-0.279629	0.938	0.952	5.87275e-09	NA	5	Radial Glia
NASP	1.87211e-13	-0.443148	0.82	0.881	3.89192e-09	nuclear autoantigenic sperm protein [Source:HGNC Symbol	5	Radial Glia
DHX40	1.86601e-13	-0.344979	0.555	0.713	3.87925e-09	DEAH-box helicase 40 [Source:HGNC Symbol	5	Radial Glia
CNR1	1.59942e-13	-0.368896	0.141	0.261	3.32504e-09	cannabinoid receptor 1 [Source:HGNC Symbol	5	Radial Glia
DDX3X	1.5661e-13	-0.387662	0.642	0.764	3.25576e-09	DEAD-box helicase 3 X-linked [Source:HGNC Symbol	5	Radial Glia
EN2	1.55514e-13	-0.380655	0.311	0.505	3.23298e-09	engrailed homeobox 2 [Source:HGNC Symbol	5	Radial Glia
ALCAM	1.36685e-13	-0.436764	0.146	0.3	2.84154e-09	activated leukocyte cell adhesion molecule [Source:HGNC Symbol	5	Radial Glia
DECR1	1.36165e-13	-0.338019	0.455	0.634	2.83073e-09	2;4-dienoyl-CoA reductase 1 [Source:HGNC Symbol	5	Radial Glia
SHISA9	1.26158e-13	-0.396062	0.266	0.454	2.62271e-09	shisa family member 9 [Source:HGNC Symbol	5	Radial Glia
PAX3	1.11288e-13	-0.389978	0.355	0.544	2.31356e-09	paired box 3 [Source:HGNC Symbol	5	Radial Glia
TTC3	9.23111e-14	-0.38518	0.901	0.944	1.91906e-09	tetratricopeptide repeat domain 3 [Source:HGNC Symbol	5	Radial Glia
IL1RAPL1	8.22411e-14	0.289246	0.266	0.108	1.70971e-09	interleukin 1 receptor accessory protein like 1 [Source:HGNC Symbol	5	Radial Glia
PCDH7	6.35396e-14	-0.334115	0.103	0.263	1.32092e-09	protocadherin 7 [Source:HGNC Symbol	5	Radial Glia
EFNA5	5.81259e-14	-0.367854	0.62	0.777	1.20838e-09	ephrin A5 [Source:HGNC Symbol	5	Radial Glia
CASK	5.80333e-14	0.324662	0.506	0.303	1.20645e-09	calcium/calmodulin dependent serine protein kinase [Source:HGNC Symbol	5	Radial Glia
MARCKS	4.67048e-14	-0.366791	0.988	0.992	9.70947e-10	myristoylated alanine rich protein kinase C substrate [Source:HGNC Symbol	5	Radial Glia
MT-CO1	4.28178e-14	0.361182	0.988	0.988	8.90139e-10	mitochondrially encoded cytochrome c oxidase I [Source:HGNC Symbol	5	Radial Glia
PAFAH1B3	2.95022e-14	-0.38561	0.649	0.779	6.13321e-10	platelet activating factor acetylhydrolase 1b catalytic subunit 3 [Source:HGNC Symbol	5	Radial Glia
ZNF22	2.94312e-14	-0.358141	0.518	0.675	6.11846e-10	zinc finger protein 22 [Source:HGNC Symbol	5	Radial Glia
RPS29	2.87235e-14	-0.26781	0.995	0.997	5.97133e-10	ribosomal protein S29 [Source:HGNC Symbol	5	Radial Glia
HN1	2.85573e-14	-0.376499	0.866	0.926	5.93678e-10	NA	5	Radial Glia
TMSB15B	2.61488e-14	0.342591	0.42	0.218	5.43607e-10	thymosin beta 15B [Source:HGNC Symbol	5	Radial Glia
TMSB15B	2.61488e-14	0.342591	0.42	0.218	5.43607e-10	thymosin beta 15B [Source:NCBI gene	5	Radial Glia
PGM5	2.52647e-14	-0.336512	0.116	0.292	5.25229e-10	phosphoglucomutase 5 [Source:HGNC Symbol	5	Radial Glia
COX7C	2.40002e-14	-0.257384	0.995	0.995	4.9894e-10	cytochrome c oxidase subunit 7C [Source:HGNC Symbol	5	Radial Glia
RPS27L	2.15401e-14	0.327437	0.968	0.947	4.47797e-10	ribosomal protein S27 like [Source:HGNC Symbol	5	Radial Glia
TLE4	1.98065e-14	-0.467787	0.82	0.839	4.11757e-10	TLE family member 4; transcriptional corepressor [Source:HGNC Symbol	5	Radial Glia
PGM5-AS1	1.90303e-14	-0.441032	0.108	0.284	3.95621e-10	PGM5 antisense RNA 1 [Source:HGNC Symbol	5	Radial Glia
CMC1	9.93261e-15	0.285019	0.452	0.24	2.06489e-10	C-X9-C motif containing 1 [Source:HGNC Symbol	5	Radial Glia
CBX1	9.63195e-15	-0.36423	0.765	0.847	2.00239e-10	chromobox 1 [Source:HGNC Symbol	5	Radial Glia
UNC119	8.97324e-15	0.373889	0.682	0.495	1.86545e-10	unc-119 lipid binding chaperone [Source:HGNC Symbol	5	Radial Glia
FAM46A	7.92665e-15	-0.411894	0.21	0.389	1.64787e-10	NA	5	Radial Glia
HMGN1	7.50078e-15	0.279144	0.966	0.929	1.55934e-10	high mobility group nucleosome binding domain 1 [Source:HGNC Symbol	5	Radial Glia
HNRNPAB	7.04397e-15	-0.395878	0.748	0.836	1.46437e-10	heterogeneous nuclear ribonucleoprotein A/B [Source:HGNC Symbol	5	Radial Glia
EEF2	6.92708e-15	0.298733	0.98	0.98	1.44007e-10	eukaryotic translation elongation factor 2 [Source:HGNC Symbol	5	Radial Glia
HSP90AA1	4.14824e-15	-0.301465	0.997	0.997	8.62378e-11	heat shock protein 90 alpha family class A member 1 [Source:HGNC Symbol	5	Radial Glia
EIF2S3	3.67628e-15	0.356263	0.731	0.57	7.64261e-11	eukaryotic translation initiation factor 2 subunit gamma [Source:HGNC Symbol	5	Radial Glia
PAX6	3.43684e-15	0.355853	0.203	0.056	7.14485e-11	paired box 6 [Source:HGNC Symbol	5	Radial Glia
CADPS2	2.73373e-15	-0.438228	0.22	0.369	5.68316e-11	calcium dependent secretion activator 2 [Source:HGNC Symbol	5	Radial Glia
PPDPF	2.65459e-15	0.285647	0.983	0.986	5.51862e-11	pancreatic progenitor cell differentiation and proliferation factor [Source:HGNC Symbol	5	Radial Glia
H2AFJ	2.3912e-15	0.375912	0.479	0.263	4.97107e-11	H2A histone family member J [Source:HGNC Symbol	5	Radial Glia
PTP4A1	1.59577e-15	0.517398	0.666	0.524	3.31745e-11	protein tyrosine phosphatase 4A1 [Source:HGNC Symbol	5	Radial Glia
RPL7A	1.45232e-15	0.256153	1	0.998	3.01922e-11	ribosomal protein L7a [Source:HGNC Symbol	5	Radial Glia
TAGLN3	9.57279e-16	-0.542074	0.595	0.73	1.99009e-11	transgelin 3 [Source:HGNC Symbol	5	Radial Glia
RPS7	9.46573e-16	0.251231	0.998	0.995	1.96783e-11	ribosomal protein S7 [Source:HGNC Symbol	5	Radial Glia
DDX1	8.94976e-16	-0.369274	0.558	0.72	1.86056e-11	DEAD-box helicase 1 [Source:HGNC Symbol	5	Radial Glia
CFL1	8.4033e-16	-0.27105	0.983	0.988	1.74696e-11	cofilin 1 [Source:HGNC Symbol	5	Radial Glia
TFAP2B	7.33756e-16	-0.519508	0.01	0.116	1.52541e-11	transcription factor AP-2 beta [Source:HGNC Symbol	5	Radial Glia
LMO3	5.41143e-16	-0.350888	0.23	0.445	1.12498e-11	LIM domain only 3 [Source:HGNC Symbol	5	Radial Glia
WBP5	5.40099e-16	0.387519	0.896	0.802	1.12281e-11	NA	5	Radial Glia
YWHAE	4.39552e-16	-0.307852	0.961	0.986	9.13785e-12	tyrosine 3-monooxygenase/tryptophan 5-monooxygenase activation protein epsilon [Source:HGNC Symbol	5	Radial Glia
DNAJA1	2.68692e-16	-0.344107	0.95	0.971	5.58584e-12	DnaJ heat shock protein family (Hsp40) member A1 [Source:HGNC Symbol	5	Radial Glia
LDHA	1.6762e-16	0.783412	0.509	0.349	3.48465e-12	lactate dehydrogenase A [Source:HGNC Symbol	5	Radial Glia
CCDC160	1.33888e-16	0.328915	0.366	0.161	2.78339e-12	coiled-coil domain containing 160 [Source:HGNC Symbol	5	Radial Glia
NRIP3	8.13293e-17	0.304428	0.252	0.076	1.69076e-12	nuclear receptor interacting protein 3 [Source:HGNC Symbol	5	Radial Glia
PHPT1	6.75664e-17	0.337636	0.973	0.96	1.40464e-12	phosphohistidine phosphatase 1 [Source:HGNC Symbol	5	Radial Glia
PPP1R14B	2.53859e-17	-0.396951	0.803	0.884	5.27748e-13	protein phosphatase 1 regulatory inhibitor subunit 14B [Source:HGNC Symbol	5	Radial Glia
UCHL1	2.35211e-17	-0.468161	0.687	0.842	4.8898e-13	ubiquitin C-terminal hydrolase L1 [Source:HGNC Symbol	5	Radial Glia
PAK3	1.8387e-17	0.435315	0.539	0.32	3.82248e-13	p21 (RAC1) activated kinase 3 [Source:HGNC Symbol	5	Radial Glia
TPM4	1.8096e-17	-0.436759	0.661	0.791	3.76198e-13	tropomyosin 4 [Source:HGNC Symbol	5	Radial Glia
PTMA	1.5698e-17	-0.2914	0.998	1	3.26347e-13	prothymosin alpha [Source:HGNC Symbol	5	Radial Glia
SCUBE2	1.19335e-17	0.416447	0.249	0.073	2.48086e-13	signal peptide; CUB domain and EGF like domain containing 2 [Source:HGNC Symbol	5	Radial Glia
LGMN	1.14936e-17	0.399176	0.597	0.368	2.3894e-13	legumain [Source:HGNC Symbol	5	Radial Glia
MLLT3	1.14323e-17	-0.509418	0.511	0.713	2.37666e-13	MLLT3 super elongation complex subunit [Source:HGNC Symbol	5	Radial Glia
PSMA7	9.0676e-18	-0.340405	0.963	0.983	1.88506e-13	proteasome subunit alpha 7 [Source:HGNC Symbol	5	Radial Glia
HES1	8.69799e-18	-0.697187	0.661	0.751	1.80823e-13	hes family bHLH transcription factor 1 [Source:HGNC Symbol	5	Radial Glia
NR2F2	7.6797e-18	0.44364	0.407	0.187	1.59653e-13	nuclear receptor subfamily 2 group F member 2 [Source:HGNC Symbol	5	Radial Glia
JPX	7.53798e-18	0.339516	0.635	0.396	1.56707e-13	JPX transcript; XIST activator [Source:HGNC Symbol	5	Radial Glia
GRIA4	7.38829e-18	-0.274001	0.034	0.175	1.53595e-13	glutamate ionotropic receptor AMPA type subunit 4 [Source:HGNC Symbol	5	Radial Glia
ODC1	7.08565e-18	0.396817	0.955	0.923	1.47304e-13	ornithine decarboxylase 1 [Source:HGNC Symbol	5	Radial Glia
SLC43A2	1.97544e-18	0.345852	0.43	0.201	4.10674e-14	solute carrier family 43 member 2 [Source:HGNC Symbol	5	Radial Glia
MAP2	1.59853e-18	-0.485044	0.803	0.892	3.32318e-14	microtubule associated protein 2 [Source:HGNC Symbol	5	Radial Glia
SPOCK2	1.53592e-18	0.260442	0.286	0.09	3.19301e-14	SPARC (osteonectin); cwcv and kazal like domains proteoglycan 2 [Source:HGNC Symbol	5	Radial Glia
TCEAL2	1.03776e-18	-0.385649	0.363	0.615	2.15739e-14	transcription elongation factor A like 2 [Source:HGNC Symbol	5	Radial Glia
FNBP1L	6.64908e-19	-0.416136	0.666	0.794	1.38228e-14	formin binding protein 1 like [Source:HGNC Symbol	5	Radial Glia
SLITRK6	6.22085e-19	0.301892	0.193	0.036	1.29325e-14	SLIT and NTRK like family member 6 [Source:HGNC Symbol	5	Radial Glia
RBBP7	5.3832e-19	0.426165	0.674	0.482	1.11911e-14	RB binding protein 7; chromatin remodeling factor [Source:HGNC Symbol	5	Radial Glia
CA14	4.50727e-19	0.571388	0.734	0.586	9.37017e-15	carbonic anhydrase 14 [Source:HGNC Symbol	5	Radial Glia
TMSB4X	3.66963e-19	0.433742	1	0.988	7.6288e-15	thymosin beta 4 X-linked [Source:HGNC Symbol	5	Radial Glia
CBX5	2.42048e-19	-0.473089	0.753	0.873	5.03193e-15	chromobox 5 [Source:HGNC Symbol	5	Radial Glia
EPHB1	2.05114e-19	-0.435109	0.091	0.264	4.26411e-15	EPH receptor B1 [Source:HGNC Symbol	5	Radial Glia
BMP4	1.64037e-19	-0.527786	0.17	0.386	3.41017e-15	bone morphogenetic protein 4 [Source:HGNC Symbol	5	Radial Glia
CXCR4	6.74405e-20	-0.656669	0.664	0.824	1.40202e-15	C-X-C motif chemokine receptor 4 [Source:HGNC Symbol	5	Radial Glia
SMS	5.55649e-20	0.468618	0.649	0.411	1.15514e-15	spermine synthase [Source:HGNC Symbol	5	Radial Glia
MT-CO3	7.77373e-21	0.482366	0.995	0.983	1.61608e-16	mitochondrially encoded cytochrome c oxidase III [Source:HGNC Symbol	5	Radial Glia
SET	4.98404e-21	-0.376674	0.951	0.972	1.03613e-16	SET nuclear proto-oncogene [Source:HGNC Symbol	5	Radial Glia
VAT1L	2.12536e-21	0.400313	0.435	0.187	4.4184e-17	vesicle amine transport 1 like [Source:HGNC Symbol	5	Radial Glia
GOPC	1.87069e-21	0.387094	0.521	0.26	3.88897e-17	golgi associated PDZ and coiled-coil motif containing [Source:HGNC Symbol	5	Radial Glia
SRP14	1.58243e-21	-0.485795	0.992	0.994	3.28971e-17	signal recognition particle 14 [Source:HGNC Symbol	5	Radial Glia
WNT4	1.3349e-21	0.893266	0.42	0.185	2.77513e-17	Wnt family member 4 [Source:HGNC Symbol	5	Radial Glia
SNHG8	4.47872e-22	0.470245	0.83	0.611	9.31081e-18	small nucleolar RNA host gene 8 [Source:HGNC Symbol	5	Radial Glia
HNRNPDL	3.87422e-22	-0.380802	0.96	0.972	8.05412e-18	heterogeneous nuclear ribonucleoprotein D like [Source:HGNC Symbol	5	Radial Glia
PCLO	3.83222e-22	0.509251	0.558	0.318	7.96681e-18	piccolo presynaptic cytomatrix protein [Source:HGNC Symbol	5	Radial Glia
RPS14	1.73106e-22	0.288125	1	1	3.5987e-18	ribosomal protein S14 [Source:HGNC Symbol	5	Radial Glia
HOXA7	9.47958e-23	0.311616	0.232	0.045	1.97071e-18	homeobox A7 [Source:HGNC Symbol	5	Radial Glia
TCF12	6.38649e-23	-0.492654	0.516	0.692	1.32769e-18	transcription factor 12 [Source:HGNC Symbol	5	Radial Glia
PCDHB2	5.10553e-23	0.373652	0.38	0.138	1.06139e-18	protocadherin beta 2 [Source:HGNC Symbol	5	Radial Glia
DYNC1I2	4.54544e-23	-0.458494	0.802	0.904	9.44952e-19	dynein cytoplasmic 1 intermediate chain 2 [Source:HGNC Symbol	5	Radial Glia
ZNF682	3.06532e-23	0.270523	0.255	0.056	6.3725e-19	zinc finger protein 682 [Source:HGNC Symbol	5	Radial Glia
USP11	2.43712e-23	0.48334	0.807	0.614	5.06652e-19	ubiquitin specific peptidase 11 [Source:HGNC Symbol	5	Radial Glia
RN7SL1	1.24274e-23	-0.523169	0.42	0.646	2.58353e-19	RNA component of signal recognition particle 7SL1 [Source:HGNC Symbol	5	Radial Glia
PRDX6	1.03613e-23	0.388478	0.948	0.934	2.15401e-19	peroxiredoxin 6 [Source:HGNC Symbol	5	Radial Glia
PNRC1	9.61486e-24	-0.492733	0.842	0.895	1.99883e-19	proline rich nuclear receptor coactivator 1 [Source:HGNC Symbol	5	Radial Glia
EIF4G2	6.81659e-24	-0.462096	0.896	0.937	1.4171e-19	eukaryotic translation initiation factor 4 gamma 2 [Source:HGNC Symbol	5	Radial Glia
BTG1	5.47783e-24	-0.618794	0.929	0.958	1.13879e-19	BTG anti-proliferation factor 1 [Source:HGNC Symbol	5	Radial Glia
SNCG	4.50278e-24	0.420979	0.346	0.108	9.36082e-20	synuclein gamma [Source:HGNC Symbol	5	Radial Glia
DUSP15	4.44926e-24	0.430693	0.44	0.187	9.24956e-20	dual specificity phosphatase 15 [Source:HGNC Symbol	5	Radial Glia
GPM6A	3.68744e-24	-0.577739	0.39	0.615	7.66581e-20	glycoprotein M6A [Source:HGNC Symbol	5	Radial Glia
HMGB2	2.67061e-24	0.525321	0.864	0.688	5.55192e-20	high mobility group box 2 [Source:HGNC Symbol	5	Radial Glia
HOXA9	2.66024e-24	0.366931	0.271	0.063	5.53037e-20	homeobox A9 [Source:HGNC Symbol	5	Radial Glia
RPL29	2.06491e-24	0.306994	1	1	4.29273e-20	ribosomal protein L29 [Source:HGNC Symbol	5	Radial Glia
PTN	1.60556e-24	-0.92287	0.77	0.895	3.3378e-20	pleiotrophin [Source:HGNC Symbol	5	Radial Glia
FSTL1	1.42927e-24	-0.664903	0.585	0.725	2.97131e-20	follistatin like 1 [Source:HGNC Symbol	5	Radial Glia
RPL41	6.18374e-25	0.271834	1	1	1.28554e-20	ribosomal protein L41 [Source:HGNC Symbol	5	Radial Glia
TOX3	1.91827e-25	-0.566257	0.444	0.679	3.98789e-21	TOX high mobility group box family member 3 [Source:HGNC Symbol	5	Radial Glia
FSIP2	1.72962e-25	0.281592	0.245	0.045	3.5957e-21	fibrous sheath interacting protein 2 [Source:HGNC Symbol	5	Radial Glia
RUNX1T1	7.37748e-26	-0.562933	0.091	0.326	1.53371e-21	RUNX1 partner transcriptional co-repressor 1 [Source:HGNC Symbol	5	Radial Glia
GDF15	2.72321e-26	0.50223	0.284	0.06	5.66129e-22	growth differentiation factor 15 [Source:HGNC Symbol	5	Radial Glia
RPL39L	1.59689e-26	0.317866	0.277	0.059	3.31977e-22	ribosomal protein L39 like [Source:HGNC Symbol	5	Radial Glia
COL1A2	1.08085e-26	0.900155	0.477	0.192	2.24699e-22	collagen type I alpha 2 chain [Source:HGNC Symbol	5	Radial Glia
EIF1AX	7.291e-27	0.481332	0.933	0.842	1.51573e-22	eukaryotic translation initiation factor 1A X-linked [Source:HGNC Symbol	5	Radial Glia
MAB21L1	3.98287e-27	-0.570663	0.145	0.399	8.27999e-23	mab-21 like 1 [Source:HGNC Symbol	5	Radial Glia
TIMP1	2.13845e-27	0.59074	0.681	0.391	4.44562e-23	TIMP metallopeptidase inhibitor 1 [Source:HGNC Symbol	5	Radial Glia
SLC2A1	1.7585e-27	0.696621	0.637	0.368	3.65574e-23	solute carrier family 2 member 1 [Source:HGNC Symbol	5	Radial Glia
TXNIP	1.55645e-27	0.651457	0.741	0.485	3.2357e-23	thioredoxin interacting protein [Source:HGNC Symbol	5	Radial Glia
TCEAL8	1.2777e-27	0.497781	0.837	0.675	2.65622e-23	transcription elongation factor A like 8 [Source:HGNC Symbol	5	Radial Glia
H3F3A	1.03396e-27	-0.25509	1	0.994	2.1495e-23	H3 histone family member 3A [Source:HGNC Symbol	5	Radial Glia
SLC44A2	5.58015e-28	0.504281	0.625	0.343	1.16006e-23	solute carrier family 44 member 2 [Source:HGNC Symbol	5	Radial Glia
NUDT16	1.78307e-28	0.475273	0.519	0.235	3.70683e-24	nudix hydrolase 16 [Source:HGNC Symbol	5	Radial Glia
ZNF677	1.30475e-28	0.319092	0.321	0.074	2.71244e-24	zinc finger protein 677 [Source:HGNC Symbol	5	Radial Glia
FBLN1	1.615e-29	-0.574036	0.225	0.516	3.35743e-25	fibulin 1 [Source:HGNC Symbol	5	Radial Glia
VIT	4.55339e-30	-0.525748	0.024	0.226	9.46605e-26	vitrin [Source:HGNC Symbol	5	Radial Glia
UBA1	5.09504e-31	0.531114	0.738	0.516	1.05921e-26	ubiquitin like modifier activating enzyme 1 [Source:HGNC Symbol	5	Radial Glia
STMN1	2.29585e-31	-0.548295	0.983	0.989	4.77284e-27	stathmin 1 [Source:HGNC Symbol	5	Radial Glia
RP11-499F3,2	7.64234e-32	0.254975	0.198	0.011	1.58877e-27	NA	5	Radial Glia
TMEM47	4.21053e-32	0.633886	0.679	0.437	8.75327e-28	transmembrane protein 47 [Source:HGNC Symbol	5	Radial Glia
DLK1	2.37166e-32	0.910547	0.963	0.807	4.93044e-28	delta like non-canonical Notch ligand 1 [Source:HGNC Symbol	5	Radial Glia
C19orf81	7.16028e-33	0.29459	0.24	0.023	1.48855e-28	chromosome 19 open reading frame 81 [Source:HGNC Symbol	5	Radial Glia
BEX4	1.2187e-33	0.542254	0.941	0.836	2.53355e-29	brain expressed X-linked 4 [Source:HGNC Symbol	5	Radial Glia
CD99	8.00908e-35	0.631213	0.854	0.66	1.66501e-30	CD99 molecule (Xg blood group) [Source:HGNC Symbol	5	Radial Glia
ZNF280D	6.51022e-35	-0.422091	0.069	0.335	1.35341e-30	zinc finger protein 280D [Source:HGNC Symbol	5	Radial Glia
RPL3	4.44638e-35	0.385406	1	0.998	9.24358e-31	ribosomal protein L3 [Source:HGNC Symbol	5	Radial Glia
LINC01021	1.02743e-35	0.475074	0.412	0.105	2.13593e-31	NA	5	Radial Glia
RPS10	1.83151e-36	0.426668	0.973	0.975	3.80752e-32	ribosomal protein S10 [Source:HGNC Symbol	5	Radial Glia
TMEM132C	8.32021e-37	-0.292095	0	0.179	1.72969e-32	transmembrane protein 132C [Source:HGNC Symbol	5	Radial Glia
COMT	6.76951e-37	0.480353	0.417	0.111	1.40731e-32	catechol-O-methyltransferase [Source:HGNC Symbol	5	Radial Glia
BEX2	1.07722e-37	0.599433	0.934	0.839	2.23944e-33	brain expressed X-linked 2 [Source:HGNC Symbol	5	Radial Glia
RPS18	1.3693e-38	0.403922	1	0.998	2.84663e-34	ribosomal protein S18 [Source:HGNC Symbol	5	Radial Glia
DPYSL2	3.83022e-39	-0.690574	0.598	0.811	7.96264e-35	dihydropyrimidinase like 2 [Source:HGNC Symbol	5	Radial Glia
EMC10	5.12865e-40	0.342174	0.294	0.031	1.0662e-35	ER membrane protein complex subunit 10 [Source:HGNC Symbol	5	Radial Glia
SAT1	1.77922e-42	0.919934	0.82	0.524	3.69882e-38	spermidine/spermine N1-acetyltransferase 1 [Source:HGNC Symbol	5	Radial Glia
MORF4L2	1.16826e-42	0.617758	0.953	0.839	2.42869e-38	mortality factor 4 like 2 [Source:HGNC Symbol	5	Radial Glia
C1orf54	1.49584e-47	0.795316	0.845	0.649	3.1097e-43	chromosome 1 open reading frame 54 [Source:HGNC Symbol	5	Radial Glia
TMBIM4,1	1.12018e-48	0.684956	0.667	0.274	2.32873e-44	NA	5	Radial Glia
CLEC11A	9.70454e-49	0.471922	0.345	0.037	2.01748e-44	C-type lectin domain containing 11A [Source:HGNC Symbol	5	Radial Glia
CHL1	8.10999e-49	0.626492	0.356	0.04	1.68599e-44	cell adhesion molecule L1 like [Source:HGNC Symbol	5	Radial Glia
NEAT1	5.70614e-49	1.2407	0.857	0.623	1.18625e-44	nuclear paraspeckle assembly transcript 1 [Source:HGNC Symbol	5	Radial Glia
PEG10	4.33171e-52	-1.09442	0.955	0.991	9.0052e-48	paternally expressed 10 [Source:HGNC Symbol	5	Radial Glia
ATP6AP2	4.61467e-53	0.740085	0.901	0.714	9.59344e-49	ATPase H+ transporting accessory protein 2 [Source:HGNC Symbol	5	Radial Glia
RPS6	1.97065e-55	0.530794	1	0.998	4.09679e-51	ribosomal protein S6 [Source:HGNC Symbol	5	Radial Glia
S100A6	5.94355e-62	-0.538286	0	0.292	1.2356e-57	S100 calcium binding protein A6 [Source:HGNC Symbol	5	Radial Glia
MEIS2	2.30829e-66	-1.12921	0.324	0.719	4.79871e-62	Meis homeobox 2 [Source:HGNC Symbol	5	Radial Glia
EDNRB	1.51432e-66	0.791703	0.413	0.034	3.14812e-62	endothelin receptor type B [Source:HGNC Symbol	5	Radial Glia
PRDX4	2.24711e-67	0.833229	0.933	0.723	4.67152e-63	peroxiredoxin 4 [Source:HGNC Symbol	5	Radial Glia
NGFRAP1	1.69664e-72	0.664145	0.997	0.991	3.52715e-68	NA	5	Radial Glia
CHCHD2	1.29084e-75	-0.773682	0.881	0.977	2.68352e-71	coiled-coil-helix-coiled-coil-helix domain containing 2 [Source:HGNC Symbol	5	Radial Glia
SLC25A6	4.66242e-82	0.844862	0.95	0.842	9.69271e-78	solute carrier family 25 member 6 [Source:HGNC Symbol	5	Radial Glia
BTF3	9.09648e-86	0.801849	0.978	0.958	1.89107e-81	basic transcription factor 3 [Source:HGNC Symbol	5	Radial Glia
7SK,2	1.91004e-143	-2.13709	0.852	0.958	3.97078e-139	NA	5	Radial Glia
ENO1	1.38787e-06	-0.261464	0.971	0.968	0.0288524	enolase 1 [Source:HGNC Symbol	4	Radial Glia
GYPC	1.3539e-06	0.266679	0.866	0.83	0.0281462	glycophorin C (Gerbich blood group) [Source:HGNC Symbol	4	Radial Glia
H2AFZ	1.29634e-06	-0.267763	0.951	0.963	0.0269495	H2A histone family member Z [Source:HGNC Symbol	4	Radial Glia
PEG10	9.73874e-07	-0.38958	0.636	0.719	0.0202459	paternally expressed 10 [Source:HGNC Symbol	4	Radial Glia
RND3	6.46939e-07	-0.276679	0.415	0.516	0.0134492	Rho family GTPase 3 [Source:HGNC Symbol	4	Radial Glia
IGFBP2	2.49607e-07	-0.263711	0.993	0.98	0.00518907	insulin like growth factor binding protein 2 [Source:HGNC Symbol	4	Radial Glia
SFRP1	1.26715e-07	0.396062	0.66	0.543	0.00263429	secreted frizzled related protein 1 [Source:HGNC Symbol	4	Radial Glia
ETFB	1.23158e-07	0.25298	0.88	0.848	0.00256032	electron transfer flavoprotein subunit beta [Source:HGNC Symbol	4	Radial Glia
UPF3B	8.64361e-08	0.252574	0.66	0.533	0.00179692	UPF3B regulator of nonsense mediated mRNA decay [Source:HGNC Symbol	4	Radial Glia
TMSB15A	8.14603e-08	-0.255095	0.8	0.845	0.00169348	thymosin beta 15a [Source:HGNC Symbol	4	Radial Glia
P4HA1	6.21915e-08	-0.350965	0.489	0.6	0.0012929	prolyl 4-hydroxylase subunit alpha 1 [Source:HGNC Symbol	4	Radial Glia
CXCR4	5.07184e-08	-0.318171	0.589	0.663	0.00105438	C-X-C motif chemokine receptor 4 [Source:HGNC Symbol	4	Radial Glia
BAX	3.53842e-08	0.265099	0.755	0.695	0.000735602	BCL2 associated X; apoptosis regulator [Source:HGNC Symbol	4	Radial Glia
MT-CO1	1.69169e-08	0.271356	0.998	0.99	0.000351685	mitochondrially encoded cytochrome c oxidase I [Source:HGNC Symbol	4	Radial Glia
STMN4	1.21676e-08	-0.331972	0.138	0.247	0.000252952	stathmin 4 [Source:HGNC Symbol	4	Radial Glia
PNRC1	6.71946e-09	-0.28117	0.791	0.838	0.000139691	proline rich nuclear receptor coactivator 1 [Source:HGNC Symbol	4	Radial Glia
DCXR	6.14662e-09	0.262691	0.894	0.818	0.000127782	dicarbonyl and L-xylulose reductase [Source:HGNC Symbol	4	Radial Glia
SLC44A2	4.18703e-09	0.252354	0.712	0.6	8.70442e-05	solute carrier family 44 member 2 [Source:HGNC Symbol	4	Radial Glia
SRGAP3	2.76157e-09	-0.283349	0.83	0.869	5.74103e-05	SLIT-ROBO Rho GTPase activating protein 3 [Source:HGNC Symbol	4	Radial Glia
SPAG9	2.26104e-09	-0.265762	0.673	0.724	4.70048e-05	sperm associated antigen 9 [Source:HGNC Symbol	4	Radial Glia
MARCKSL1	2.09289e-09	-0.252151	0.99	0.993	4.35092e-05	MARCKS like 1 [Source:HGNC Symbol	4	Radial Glia
PLTP	1.71399e-09	0.278235	0.635	0.492	3.56322e-05	phospholipid transfer protein [Source:HGNC Symbol	4	Radial Glia
ID4	1.5348e-09	-0.304195	0.768	0.823	3.19069e-05	inhibitor of DNA binding 4; HLH protein [Source:HGNC Symbol	4	Radial Glia
MT-ND5	1.39414e-09	0.298205	0.97	0.957	2.89828e-05	mitochondrially encoded NADH:ubiquinone oxidoreductase core subunit 5 [Source:HGNC Symbol	4	Radial Glia
HOXA2	1.28819e-09	-0.259309	0.289	0.387	2.67802e-05	homeobox A2 [Source:HGNC Symbol	4	Radial Glia
CETN2	1.26158e-09	-0.258435	0.633	0.702	2.62269e-05	centrin 2 [Source:HGNC Symbol	4	Radial Glia
PCDH18	1.09797e-09	-0.28777	0.414	0.516	2.28258e-05	protocadherin 18 [Source:HGNC Symbol	4	Radial Glia
EIF4G2	1.08938e-09	-0.259074	0.849	0.871	2.26472e-05	eukaryotic translation initiation factor 4 gamma 2 [Source:HGNC Symbol	4	Radial Glia
MYL6	9.37307e-10	-0.261448	0.964	0.966	1.94857e-05	myosin light chain 6 [Source:HGNC Symbol	4	Radial Glia
CRNDE	6.74276e-10	-0.255808	0.896	0.91	1.40175e-05	colorectal neoplasia differentially expressed [Source:HGNC Symbol	4	Radial Glia
HN1	6.65012e-10	-0.272784	0.9	0.945	1.38249e-05	NA	4	Radial Glia
GPC3	6.37165e-10	0.253698	0.712	0.545	1.3246e-05	glypican 3 [Source:HGNC Symbol	4	Radial Glia
CHCHD2	4.8486e-10	-0.255002	0.897	0.956	1.00798e-05	coiled-coil-helix-coiled-coil-helix domain containing 2 [Source:HGNC Symbol	4	Radial Glia
LINC00461	4.4761e-10	-0.338101	0.64	0.722	9.30536e-06	long intergenic non-protein coding RNA 461 [Source:HGNC Symbol	4	Radial Glia
TUBB	2.96423e-10	-0.282718	0.975	0.964	6.16233e-06	tubulin beta class I [Source:HGNC Symbol	4	Radial Glia
SLC25A5	2.58771e-10	0.259565	0.938	0.898	5.3796e-06	solute carrier family 25 member 5 [Source:HGNC Symbol	4	Radial Glia
HIST1H1E	2.323e-10	-0.341256	0.393	0.521	4.82928e-06	histone cluster 1 H1 family member e [Source:HGNC Symbol	4	Radial Glia
RTN4	1.93136e-10	-0.250769	0.887	0.918	4.01511e-06	reticulon 4 [Source:HGNC Symbol	4	Radial Glia
BNIP3	1.67987e-10	-0.41803	0.403	0.52	3.49229e-06	BCL2 interacting protein 3 [Source:HGNC Symbol	4	Radial Glia
ANP32B	1.22884e-10	0.270159	0.905	0.833	2.55463e-06	acidic nuclear phosphoprotein 32 family member B [Source:HGNC Symbol	4	Radial Glia
HMGB1	1.00106e-10	-0.285257	0.996	1	2.0811e-06	high mobility group box 1 [Source:HGNC Symbol	4	Radial Glia
HSP90AA1	6.19912e-11	-0.303726	0.995	0.995	1.28874e-06	heat shock protein 90 alpha family class A member 1 [Source:HGNC Symbol	4	Radial Glia
LINC01158	5.19578e-11	-0.332099	0.768	0.826	1.08015e-06	NA	4	Radial Glia
MT-CO3	5.12949e-11	0.397776	0.993	0.974	1.06637e-06	mitochondrially encoded cytochrome c oxidase III [Source:HGNC Symbol	4	Radial Glia
SOX11	2.57652e-11	-0.318259	0.732	0.801	5.35633e-07	SRY-box transcription factor 11 [Source:HGNC Symbol	4	Radial Glia
EIF3J	1.72815e-11	-0.302591	0.695	0.773	3.59265e-07	eukaryotic translation initiation factor 3 subunit J [Source:HGNC Symbol	4	Radial Glia
GAPDH	1.3426e-11	-0.327925	1	1	2.79113e-07	glyceraldehyde-3-phosphate dehydrogenase [Source:HGNC Symbol	4	Radial Glia
STMN1	1.11138e-11	-0.339527	0.95	0.973	2.31044e-07	stathmin 1 [Source:HGNC Symbol	4	Radial Glia
DDX3X	9.27461e-12	-0.297247	0.643	0.744	1.9281e-07	DEAD-box helicase 3 X-linked [Source:HGNC Symbol	4	Radial Glia
YBX1	7.97086e-12	-0.250719	0.995	0.993	1.65706e-07	Y-box binding protein 1 [Source:HGNC Symbol	4	Radial Glia
LGALS1	6.16693e-12	0.386151	0.612	0.431	1.28204e-07	galectin 1 [Source:HGNC Symbol	4	Radial Glia
NR2F1	5.77976e-12	-0.417602	0.643	0.746	1.20155e-07	nuclear receptor subfamily 2 group F member 1 [Source:HGNC Symbol	4	Radial Glia
GNAS	2.29639e-12	-0.27024	0.99	0.991	4.77397e-08	GNAS complex locus [Source:HGNC Symbol	4	Radial Glia
CDH2	2.13303e-12	-0.306276	0.857	0.903	4.43436e-08	cadherin 2 [Source:HGNC Symbol	4	Radial Glia
FILIP1	1.94083e-12	-0.294728	0.181	0.351	4.03479e-08	filamin A interacting protein 1 [Source:HGNC Symbol	4	Radial Glia
DNAJA1	1.68113e-12	-0.273243	0.945	0.963	3.4949e-08	DnaJ heat shock protein family (Hsp40) member A1 [Source:HGNC Symbol	4	Radial Glia
PHYHIPL	7.67491e-13	-0.323167	0.217	0.375	1.59554e-08	phytanoyl-CoA 2-hydroxylase interacting protein like [Source:HGNC Symbol	4	Radial Glia
LIMCH1	5.37361e-13	-0.344287	0.345	0.514	1.11712e-08	LIM and calponin homology domains 1 [Source:HGNC Symbol	4	Radial Glia
PCP4	3.40572e-13	-0.257406	0.023	0.114	7.08014e-09	Purkinje cell protein 4 [Source:HGNC Symbol	4	Radial Glia
C6orf48	1.32984e-13	0.375368	0.809	0.741	2.7646e-09	NA	4	Radial Glia
NPC2	1.04664e-13	0.335074	0.825	0.753	2.17585e-09	NPC intracellular cholesterol transporter 2 [Source:HGNC Symbol	4	Radial Glia
RPL17	9.86498e-14	0.282675	0.911	0.871	2.05083e-09	ribosomal protein L17 [Source:HGNC Symbol	4	Radial Glia
RARRES2	9.25632e-14	0.345938	0.591	0.4	1.9243e-09	retinoic acid receptor responder 2 [Source:HGNC Symbol	4	Radial Glia
NEAT1	9.17005e-14	0.466361	0.767	0.625	1.90636e-09	nuclear paraspeckle assembly transcript 1 [Source:HGNC Symbol	4	Radial Glia
MT-ND4	7.87269e-14	0.341076	0.994	0.985	1.63665e-09	mitochondrially encoded NADH:ubiquinone oxidoreductase core subunit 4 [Source:HGNC Symbol	4	Radial Glia
PAX3	6.06333e-14	-0.348269	0.664	0.807	1.26051e-09	paired box 3 [Source:HGNC Symbol	4	Radial Glia
CCNG1	4.31043e-14	0.308027	0.867	0.804	8.96096e-10	cyclin G1 [Source:HGNC Symbol	4	Radial Glia
MARCKS	2.92631e-14	-0.268077	0.988	0.988	6.08351e-10	myristoylated alanine rich protein kinase C substrate [Source:HGNC Symbol	4	Radial Glia
PRDX2	2.82822e-14	-0.255736	0.982	0.985	5.87958e-10	peroxiredoxin 2 [Source:HGNC Symbol	4	Radial Glia
ARID5B	2.82598e-14	-0.359105	0.234	0.411	5.87494e-10	AT-rich interaction domain 5B [Source:HGNC Symbol	4	Radial Glia
LGMN	1.3696e-14	0.333296	0.58	0.397	2.84726e-10	legumain [Source:HGNC Symbol	4	Radial Glia
PLP1	1.28376e-14	-0.48875	0.264	0.388	2.66881e-10	proteolipid protein 1 [Source:HGNC Symbol	4	Radial Glia
ODC1	1.19541e-14	0.272847	0.999	0.995	2.48514e-10	ornithine decarboxylase 1 [Source:HGNC Symbol	4	Radial Glia
2011-09-01	1.52586e-15	-0.321384	0.762	0.819	3.17211e-11	NA	4	Radial Glia
RPS27L	1.46074e-15	0.347795	0.962	0.935	3.03673e-11	ribosomal protein S27 like [Source:HGNC Symbol	4	Radial Glia
SPARCL1	7.59113e-16	0.33293	0.228	0.07	1.57812e-11	SPARC like 1 [Source:HGNC Symbol	4	Radial Glia
NREP	3.78311e-16	-0.34303	0.768	0.84	7.86471e-12	neuronal regeneration related protein [Source:HGNC Symbol	4	Radial Glia
MEST	2.34616e-16	0.436411	0.848	0.741	4.87742e-12	mesoderm specific transcript [Source:HGNC Symbol	4	Radial Glia
SOCS2	1.99399e-16	-0.393325	0.393	0.586	4.14531e-12	suppressor of cytokine signaling 2 [Source:HGNC Symbol	4	Radial Glia
MAGED1	1.70742e-16	0.431306	0.845	0.748	3.54956e-12	MAGE family member D1 [Source:HGNC Symbol	4	Radial Glia
HES1	1.1512e-16	-0.521742	0.456	0.6	2.39324e-12	hes family bHLH transcription factor 1 [Source:HGNC Symbol	4	Radial Glia
GDF15	8.48122e-17	0.40761	0.373	0.17	1.76316e-12	growth differentiation factor 15 [Source:HGNC Symbol	4	Radial Glia
C1orf54	6.85727e-17	0.44223	0.822	0.704	1.42556e-12	chromosome 1 open reading frame 54 [Source:HGNC Symbol	4	Radial Glia
TIMP1	2.56464e-17	0.398887	0.684	0.526	5.33163e-13	TIMP metallopeptidase inhibitor 1 [Source:HGNC Symbol	4	Radial Glia
PRDX6	1.47603e-17	0.274184	0.984	0.966	3.06853e-13	peroxiredoxin 6 [Source:HGNC Symbol	4	Radial Glia
TPI1	9.79565e-18	-0.41837	0.964	0.98	2.03642e-13	triosephosphate isomerase 1 [Source:HGNC Symbol	4	Radial Glia
DPYSL2	5.09894e-18	-0.362909	0.661	0.767	1.06002e-13	dihydropyrimidinase like 2 [Source:HGNC Symbol	4	Radial Glia
CALM1	4.49196e-18	-0.380632	0.953	0.971	9.33834e-14	calmodulin 1 [Source:HGNC Symbol	4	Radial Glia
PTPRZ1	4.19233e-18	-0.465618	0.703	0.782	8.71544e-14	protein tyrosine phosphatase receptor type Z1 [Source:HGNC Symbol	4	Radial Glia
DUSP15	3.64477e-18	0.348398	0.576	0.361	7.57711e-14	dual specificity phosphatase 15 [Source:HGNC Symbol	4	Radial Glia
FRZB	3.10887e-18	-0.381596	0.078	0.233	6.46303e-14	frizzled related protein [Source:HGNC Symbol	4	Radial Glia
SNHG8	2.18078e-18	0.402161	0.888	0.802	4.53362e-14	small nucleolar RNA host gene 8 [Source:HGNC Symbol	4	Radial Glia
SNCG	2.15871e-18	0.476419	0.691	0.479	4.48775e-14	synuclein gamma [Source:HGNC Symbol	4	Radial Glia
CKB	8.5263e-19	-0.301064	0.995	0.997	1.77253e-14	creatine kinase B [Source:HGNC Symbol	4	Radial Glia
HMGB2	2.92628e-19	0.36205	0.969	0.896	6.08345e-15	high mobility group box 2 [Source:HGNC Symbol	4	Radial Glia
MCTS1	2.35507e-19	0.366169	0.714	0.508	4.89595e-15	MCTS1 re-initiation and release factor [Source:HGNC Symbol	4	Radial Glia
SLC25A6	1.30569e-20	0.303689	0.983	0.959	2.71439e-16	solute carrier family 25 member 6 [Source:HGNC Symbol	4	Radial Glia
RPL27	4.6608e-21	0.267327	1	0.997	9.68934e-17	ribosomal protein L27 [Source:HGNC Symbol	4	Radial Glia
IDH1	3.62611e-21	-0.42966	0.679	0.807	7.53833e-17	isocitrate dehydrogenase (NADP(+)) 1; cytosolic [Source:HGNC Symbol	4	Radial Glia
MEIS2	7.71856e-22	-0.468573	0.516	0.7	1.60461e-17	Meis homeobox 2 [Source:HGNC Symbol	4	Radial Glia
MT-ND2	3.07358e-22	0.618294	0.983	0.976	6.38968e-18	mitochondrially encoded NADH:ubiquinone oxidoreductase core subunit 2 [Source:HGNC Symbol	4	Radial Glia
ZFAS1	1.77735e-22	0.315537	0.987	0.981	3.69494e-18	ZNFX1 antisense RNA 1 [Source:HGNC Symbol	4	Radial Glia
DYNC1I2	7.04649e-23	-0.424387	0.735	0.862	1.46489e-18	dynein cytoplasmic 1 intermediate chain 2 [Source:HGNC Symbol	4	Radial Glia
PABPC1	2.48106e-23	0.346315	0.978	0.969	5.15788e-19	poly(A) binding protein cytoplasmic 1 [Source:HGNC Symbol	4	Radial Glia
PPP1R1A	1.47963e-23	-0.488616	0.507	0.69	3.076e-19	protein phosphatase 1 regulatory inhibitor subunit 1A [Source:HGNC Symbol	4	Radial Glia
TUBA1A	2.28197e-24	-0.413738	0.993	0.998	4.744e-20	tubulin alpha 1a [Source:HGNC Symbol	4	Radial Glia
SOX4	5.83085e-25	-0.494511	0.954	0.98	1.21218e-20	SRY-box transcription factor 4 [Source:HGNC Symbol	4	Radial Glia
RPL36A	3.40815e-29	0.385792	0.977	0.94	7.0852e-25	ribosomal protein L36a [Source:HGNC Symbol	4	Radial Glia
DLK1	1.51535e-31	1.21292	0.923	0.78	3.15026e-27	delta like non-canonical Notch ligand 1 [Source:HGNC Symbol	4	Radial Glia
RN7SL1	1.85815e-33	-0.617286	0.317	0.589	3.8629e-29	RNA component of signal recognition particle 7SL1 [Source:HGNC Symbol	4	Radial Glia
RPS10	9.42706e-36	0.366144	0.999	0.988	1.95979e-31	ribosomal protein S10 [Source:HGNC Symbol	4	Radial Glia
MT-ND1	5.65331e-36	0.785632	0.982	0.954	1.17527e-31	mitochondrially encoded NADH:ubiquinone oxidoreductase core subunit 1 [Source:HGNC Symbol	4	Radial Glia
RPL23A	2.7742e-37	0.340959	1	0.997	5.76728e-33	ribosomal protein L23a [Source:HGNC Symbol	4	Radial Glia
NPM1	5.5242e-38	0.3415	0.999	0.997	1.14843e-33	nucleophosmin 1 [Source:HGNC Symbol	4	Radial Glia
RPL3	6.46613e-39	0.274141	1	1	1.34424e-34	ribosomal protein L3 [Source:HGNC Symbol	4	Radial Glia
TMEM47	4.66078e-39	0.57693	0.891	0.687	9.6893e-35	transmembrane protein 47 [Source:HGNC Symbol	4	Radial Glia
RPS18	7.46551e-56	0.315661	1	1	1.55201e-51	ribosomal protein S18 [Source:HGNC Symbol	4	Radial Glia
TMBIM4,1	6.53655e-84	0.616674	0.544	0.075	1.35888e-79	NA	4	Radial Glia
7SK,2	1.12589e-133	-1.92683	0.861	0.94	2.34062e-129	NA	4	Radial Glia
HIST1H4C	6.52745e-07	-0.290196	0.999	0.997	0.0135699	histone cluster 1 H4 family member c [Source:HGNC Symbol	3	Radial Glia
CRABP1	5.9874e-07	-0.698233	0.82	0.817	0.0124472	cellular retinoic acid binding protein 1 [Source:HGNC Symbol	3	Radial Glia
HIST1H1C	1.94472e-07	-0.307004	0.992	0.995	0.00404287	histone cluster 1 H1 family member c [Source:HGNC Symbol	3	Radial Glia
TFPI2	1.09292e-07	0.326993	0.39	0.262	0.00227206	tissue factor pathway inhibitor 2 [Source:HGNC Symbol	3	Radial Glia
NLRP1	9.38242e-08	0.260431	0.848	0.753	0.00195051	NLR family pyrin domain containing 1 [Source:HGNC Symbol	3	Radial Glia
GPM6B	7.91596e-08	0.257473	0.84	0.754	0.00164565	glycoprotein M6B [Source:HGNC Symbol	3	Radial Glia
ZFHX4	2.96802e-08	-0.267008	0.729	0.797	0.000617021	zinc finger homeobox 4 [Source:HGNC Symbol	3	Radial Glia
SKA2	1.64718e-08	-0.25322	0.827	0.888	0.000342432	spindle and kinetochore associated complex subunit 2 [Source:HGNC Symbol	3	Radial Glia
PBK	1.56878e-08	-0.268851	0.792	0.85	0.000326133	PDZ binding kinase [Source:HGNC Symbol	3	Radial Glia
CLU	1.17044e-08	0.258942	0.775	0.657	0.000243323	clusterin [Source:HGNC Symbol	3	Radial Glia
HIST1H2BC	5.60177e-09	-0.257655	0.613	0.702	0.000116455	histone cluster 1 H2B family member c [Source:HGNC Symbol	3	Radial Glia
SPC25	3.43991e-09	-0.252211	0.764	0.842	7.15122e-05	SPC25 component of NDC80 kinetochore complex [Source:HGNC Symbol	3	Radial Glia
FOS	1.28209e-09	0.373245	0.9	0.836	2.66533e-05	Fos proto-oncogene; AP-1 transcription factor subunit [Source:HGNC Symbol	3	Radial Glia
FNBP1L	7.01695e-10	-0.2663	0.719	0.798	1.45875e-05	formin binding protein 1 like [Source:HGNC Symbol	3	Radial Glia
TFDP2	3.96e-10	-0.254921	0.727	0.824	8.23244e-06	transcription factor Dp-2 [Source:HGNC Symbol	3	Radial Glia
HIST1H1E	2.38614e-10	-0.32751	0.982	0.979	4.96054e-06	histone cluster 1 H1 family member e [Source:HGNC Symbol	3	Radial Glia
MAP2	1.68958e-10	-0.292526	0.79	0.858	3.51247e-06	microtubule associated protein 2 [Source:HGNC Symbol	3	Radial Glia
STAT3	1.49191e-10	0.250058	0.664	0.519	3.10152e-06	signal transducer and activator of transcription 3 [Source:HGNC Symbol	3	Radial Glia
PKIA	1.28467e-10	-0.263926	0.53	0.652	2.6707e-06	cAMP-dependent protein kinase inhibitor alpha [Source:HGNC Symbol	3	Radial Glia
WNT4	6.33361e-11	0.25565	0.328	0.174	1.31669e-06	Wnt family member 4 [Source:HGNC Symbol	3	Radial Glia
NPC2	5.47496e-11	0.267626	0.769	0.698	1.13819e-06	NPC intracellular cholesterol transporter 2 [Source:HGNC Symbol	3	Radial Glia
RASL11B	4.53567e-11	0.262479	0.437	0.294	9.42921e-07	RAS like family 11 member B [Source:HGNC Symbol	3	Radial Glia
CACYBP	4.30222e-11	-0.274056	0.887	0.92	8.94388e-07	calcyclin binding protein [Source:HGNC Symbol	3	Radial Glia
PMAIP1	3.05167e-11	-0.272423	0.394	0.547	6.34411e-07	phorbol-12-myristate-13-acetate-induced protein 1 [Source:HGNC Symbol	3	Radial Glia
MSI2	2.59929e-11	-0.270296	0.714	0.813	5.40366e-07	musashi RNA binding protein 2 [Source:HGNC Symbol	3	Radial Glia
HIST1H2AB	2.50473e-11	-0.282663	0.471	0.623	5.20708e-07	histone cluster 1 H2A family member b [Source:HGNC Symbol	3	Radial Glia
DIO3	2.44336e-11	0.252878	0.236	0.111	5.0795e-07	iodothyronine deiodinase 3 [Source:HGNC Symbol	3	Radial Glia
CSRP2	2.08894e-11	-0.254949	0.94	0.957	4.3427e-07	cysteine and glycine rich protein 2 [Source:HGNC Symbol	3	Radial Glia
SNHG8	1.62031e-11	0.273139	0.709	0.589	3.36846e-07	small nucleolar RNA host gene 8 [Source:HGNC Symbol	3	Radial Glia
TXLNG	1.46205e-11	0.255353	0.634	0.49	3.03945e-07	taxilin gamma [Source:HGNC Symbol	3	Radial Glia
MUM1	1.17688e-11	-0.268783	0.478	0.623	2.44661e-07	NA	3	Radial Glia
MT-CYB	1.00261e-11	0.285722	0.986	0.964	2.08432e-07	mitochondrially encoded cytochrome b [Source:HGNC Symbol	3	Radial Glia
ZIC2	9.61457e-12	0.294869	0.812	0.721	1.99877e-07	Zic family member 2 [Source:HGNC Symbol	3	Radial Glia
EPS8	6.08899e-12	0.25803	0.558	0.421	1.26584e-07	epidermal growth factor receptor pathway substrate 8 [Source:HGNC Symbol	3	Radial Glia
FSCN1	5.49658e-12	-0.269176	0.654	0.774	1.14268e-07	fascin actin-bundling protein 1 [Source:HGNC Symbol	3	Radial Glia
WSB1	4.39435e-12	0.288865	0.92	0.865	9.13541e-08	WD repeat and SOCS box containing 1 [Source:HGNC Symbol	3	Radial Glia
C6orf48	4.15049e-12	0.251875	0.844	0.781	8.62846e-08	NA	3	Radial Glia
SMARCA1	3.47945e-12	0.266636	0.799	0.693	7.23342e-08	SWI/SNF related; matrix associated; actin dependent regulator of chromatin; subfamily a; member 1 [Source:HGNC Symbol	3	Radial Glia
ITM2C	1.72406e-12	0.258952	0.622	0.466	3.58415e-08	integral membrane protein 2C [Source:HGNC Symbol	3	Radial Glia
WBP5	1.62196e-12	0.264969	0.9	0.84	3.3719e-08	NA	3	Radial Glia
NQO2	1.31829e-12	0.263973	0.592	0.415	2.74059e-08	N-ribosyldihydronicotinamide:quinone reductase 2 [Source:HGNC Symbol	3	Radial Glia
DTYMK	1.30465e-12	-0.260149	0.872	0.913	2.71224e-08	deoxythymidylate kinase [Source:HGNC Symbol	3	Radial Glia
USP1	1.04814e-12	-0.270463	0.885	0.916	2.17898e-08	ubiquitin specific peptidase 1 [Source:HGNC Symbol	3	Radial Glia
ATP6V0E1	7.68804e-13	0.286462	0.783	0.688	1.59827e-08	ATPase H+ transporting V0 subunit e1 [Source:HGNC Symbol	3	Radial Glia
HIST1H2BH	6.02275e-13	-0.310307	0.772	0.857	1.25207e-08	histone cluster 1 H2B family member h [Source:HGNC Symbol	3	Radial Glia
PHYHIPL	5.09706e-13	-0.259924	0.256	0.418	1.05963e-08	phytanoyl-CoA 2-hydroxylase interacting protein like [Source:HGNC Symbol	3	Radial Glia
CA14	4.40511e-13	0.268469	0.654	0.539	9.15778e-09	carbonic anhydrase 14 [Source:HGNC Symbol	3	Radial Glia
NR2F2	3.85771e-13	0.311189	0.757	0.591	8.01978e-09	nuclear receptor subfamily 2 group F member 2 [Source:HGNC Symbol	3	Radial Glia
MT-ND2	3.36721e-13	0.320685	0.975	0.968	7.0001e-09	mitochondrially encoded NADH:ubiquinone oxidoreductase core subunit 2 [Source:HGNC Symbol	3	Radial Glia
SMS	3.35231e-13	0.272854	0.889	0.796	6.96911e-09	spermine synthase [Source:HGNC Symbol	3	Radial Glia
EIF4G2	2.50744e-13	-0.26156	0.937	0.953	5.21272e-09	eukaryotic translation initiation factor 4 gamma 2 [Source:HGNC Symbol	3	Radial Glia
VAMP2	2.30206e-13	0.279769	0.923	0.876	4.78576e-09	vesicle associated membrane protein 2 [Source:HGNC Symbol	3	Radial Glia
BTG3	1.95077e-13	-0.291314	0.805	0.879	4.05545e-09	BTG anti-proliferation factor 3 [Source:HGNC Symbol	3	Radial Glia
CMC1	1.81181e-13	0.250126	0.539	0.37	3.76657e-09	C-X9-C motif containing 1 [Source:HGNC Symbol	3	Radial Glia
ZFAS1	1.3192e-13	0.253645	0.982	0.971	2.7425e-09	ZNFX1 antisense RNA 1 [Source:HGNC Symbol	3	Radial Glia
PABPC1	9.06326e-14	0.253441	0.966	0.961	1.88416e-09	poly(A) binding protein cytoplasmic 1 [Source:HGNC Symbol	3	Radial Glia
ARL4C	7.03048e-14	0.336224	0.923	0.866	1.46157e-09	ADP ribosylation factor like GTPase 4C [Source:HGNC Symbol	3	Radial Glia
EIF3J	6.55923e-14	-0.260329	0.823	0.88	1.3636e-09	eukaryotic translation initiation factor 3 subunit J [Source:HGNC Symbol	3	Radial Glia
CDK6	5.35898e-14	-0.298935	0.46	0.601	1.11408e-09	cyclin dependent kinase 6 [Source:HGNC Symbol	3	Radial Glia
FADS1	3.66955e-14	-0.315346	0.809	0.883	7.62863e-10	fatty acid desaturase 1 [Source:HGNC Symbol	3	Radial Glia
GYPC	2.7801e-14	0.346783	0.866	0.808	5.77954e-10	glycophorin C (Gerbich blood group) [Source:HGNC Symbol	3	Radial Glia
GGCT	2.50415e-14	0.288119	0.838	0.704	5.20587e-10	gamma-glutamylcyclotransferase [Source:HGNC Symbol	3	Radial Glia
IFITM2	1.27281e-14	0.34048	0.661	0.517	2.64604e-10	interferon induced transmembrane protein 2 [Source:HGNC Symbol	3	Radial Glia
PRTG	1.25173e-14	0.326633	0.634	0.479	2.60222e-10	protogenin [Source:HGNC Symbol	3	Radial Glia
USP9X	7.58449e-15	0.280119	0.64	0.494	1.57674e-10	ubiquitin specific peptidase 9 X-linked [Source:HGNC Symbol	3	Radial Glia
TSPAN18	7.42655e-15	0.324209	0.634	0.449	1.54391e-10	tetraspanin 18 [Source:HGNC Symbol	3	Radial Glia
HIST1H2BO	5.8712e-15	-0.270136	0.447	0.642	1.22056e-10	histone cluster 1 H2B family member o [Source:HGNC Symbol	3	Radial Glia
PTPRZ1	4.60514e-15	-0.358703	0.768	0.85	9.57362e-11	protein tyrosine phosphatase receptor type Z1 [Source:HGNC Symbol	3	Radial Glia
TMSB15B	3.83286e-15	0.298764	0.557	0.367	7.96814e-11	thymosin beta 15B [Source:HGNC Symbol	3	Radial Glia
TMSB15B	3.83286e-15	0.298764	0.557	0.367	7.96814e-11	thymosin beta 15B [Source:NCBI gene	3	Radial Glia
ZNF22	2.32068e-15	-0.292988	0.75	0.858	4.82447e-11	zinc finger protein 22 [Source:HGNC Symbol	3	Radial Glia
NRG1	1.86212e-15	0.312446	0.467	0.271	3.87116e-11	neuregulin 1 [Source:HGNC Symbol	3	Radial Glia
TENM3	1.85847e-15	-0.388705	0.534	0.684	3.86357e-11	teneurin transmembrane protein 3 [Source:HGNC Symbol	3	Radial Glia
HIST1H2BL	1.70076e-15	-0.269544	0.314	0.509	3.53571e-11	histone cluster 1 H2B family member l [Source:HGNC Symbol	3	Radial Glia
RAD21	1.62054e-15	-0.408439	0.925	0.952	3.36895e-11	RAD21 cohesin complex component [Source:HGNC Symbol	3	Radial Glia
FTL	1.22807e-15	-0.252436	0.994	0.988	2.55304e-11	ferritin light chain [Source:HGNC Symbol	3	Radial Glia
FBLN1	8.93924e-16	-0.311159	0.35	0.538	1.85838e-11	fibulin 1 [Source:HGNC Symbol	3	Radial Glia
HNRNPAB	8.00926e-16	-0.283159	0.962	0.973	1.66504e-11	heterogeneous nuclear ribonucleoprotein A/B [Source:HGNC Symbol	3	Radial Glia
SLC2A1	6.65562e-16	0.336454	0.703	0.619	1.38364e-11	solute carrier family 2 member 1 [Source:HGNC Symbol	3	Radial Glia
MT-ND5	4.27368e-16	0.332121	0.969	0.944	8.88455e-12	mitochondrially encoded NADH:ubiquinone oxidoreductase core subunit 5 [Source:HGNC Symbol	3	Radial Glia
CHCHD5	3.85652e-16	0.29301	0.807	0.68	8.01732e-12	coiled-coil-helix-coiled-coil-helix domain containing 5 [Source:HGNC Symbol	3	Radial Glia
PRPS1	3.22035e-16	0.254948	0.633	0.45	6.69478e-12	phosphoribosyl pyrophosphate synthetase 1 [Source:HGNC Symbol	3	Radial Glia
MEST	2.96555e-16	0.335573	0.792	0.702	6.16508e-12	mesoderm specific transcript [Source:HGNC Symbol	3	Radial Glia
HIST1H2BF	2.94538e-16	-0.368796	0.515	0.677	6.12315e-12	histone cluster 1 H2B family member f [Source:HGNC Symbol	3	Radial Glia
BEX4	2.3674e-16	0.29593	0.916	0.856	4.92159e-12	brain expressed X-linked 4 [Source:HGNC Symbol	3	Radial Glia
VAT1L	2.33541e-16	0.256219	0.47	0.278	4.85509e-12	vesicle amine transport 1 like [Source:HGNC Symbol	3	Radial Glia
EFNA5	1.83814e-16	-0.398729	0.38	0.571	3.82132e-12	ephrin A5 [Source:HGNC Symbol	3	Radial Glia
XIAP	1.06587e-16	0.303602	0.608	0.443	2.21583e-12	X-linked inhibitor of apoptosis [Source:HGNC Symbol	3	Radial Glia
AES	6.19887e-17	-0.289577	0.529	0.693	1.28868e-12	NA	3	Radial Glia
PNRC1	5.09814e-17	-0.333077	0.667	0.8	1.05985e-12	proline rich nuclear receptor coactivator 1 [Source:HGNC Symbol	3	Radial Glia
ZFP36L1	3.06509e-17	0.349143	0.942	0.929	6.37201e-13	ZFP36 ring finger protein like 1 [Source:HGNC Symbol	3	Radial Glia
GPM6A	2.75119e-17	-0.326217	0.371	0.55	5.71945e-13	glycoprotein M6A [Source:HGNC Symbol	3	Radial Glia
TCEAL8	2.05975e-17	0.312024	0.81	0.673	4.28201e-13	transcription elongation factor A like 8 [Source:HGNC Symbol	3	Radial Glia
JUN	1.9681e-17	0.46136	0.89	0.857	4.09148e-13	Jun proto-oncogene; AP-1 transcription factor subunit [Source:HGNC Symbol	3	Radial Glia
CCND1	9.18678e-18	-0.531899	0.814	0.876	1.90984e-13	cyclin D1 [Source:HGNC Symbol	3	Radial Glia
SCUBE2	6.35751e-18	0.38586	0.491	0.276	1.32166e-13	signal peptide; CUB domain and EGF like domain containing 2 [Source:HGNC Symbol	3	Radial Glia
SFRP1	2.51361e-18	0.465997	0.549	0.344	5.22553e-14	secreted frizzled related protein 1 [Source:HGNC Symbol	3	Radial Glia
SEC11A	2.40042e-18	0.261489	0.955	0.943	4.99022e-14	SEC11 homolog A; signal peptidase complex subunit [Source:HGNC Symbol	3	Radial Glia
MARCKS	2.30904e-18	-0.338112	0.99	0.991	4.80027e-14	myristoylated alanine rich protein kinase C substrate [Source:HGNC Symbol	3	Radial Glia
HNRNPDL	1.57153e-18	-0.264847	0.985	0.985	3.26705e-14	heterogeneous nuclear ribonucleoprotein D like [Source:HGNC Symbol	3	Radial Glia
MAB21L2	1.43639e-18	-0.320871	0.167	0.368	2.98612e-14	mab-21 like 2 [Source:HGNC Symbol	3	Radial Glia
MAGED2	1.08863e-18	0.296513	0.945	0.921	2.26315e-14	MAGE family member D2 [Source:HGNC Symbol	3	Radial Glia
HIST1H4E	1.02654e-18	-0.373696	0.782	0.885	2.13408e-14	histone cluster 1 H4 family member e [Source:HGNC Symbol	3	Radial Glia
MT-CO2	5.92769e-19	0.427356	0.989	0.976	1.23231e-14	mitochondrially encoded cytochrome c oxidase II [Source:HGNC Symbol	3	Radial Glia
RPS10	5.70866e-19	0.260185	0.979	0.965	1.18677e-14	ribosomal protein S10 [Source:HGNC Symbol	3	Radial Glia
FZD2	5.04438e-19	0.31289	0.608	0.413	1.04868e-14	frizzled class receptor 2 [Source:HGNC Symbol	3	Radial Glia
RABAC1	3.68167e-19	0.32035	0.944	0.889	7.65382e-15	Rab acceptor 1 [Source:HGNC Symbol	3	Radial Glia
DPYSL2	2.97415e-19	-0.320171	0.869	0.916	6.18295e-15	dihydropyrimidinase like 2 [Source:HGNC Symbol	3	Radial Glia
RBMX2	2.39292e-19	0.32325	0.792	0.64	4.97465e-15	RNA binding motif protein X-linked 2 [Source:HGNC Symbol	3	Radial Glia
HES4	1.49526e-19	-0.418103	0.985	0.981	3.10849e-15	hes family bHLH transcription factor 4 [Source:HGNC Symbol	3	Radial Glia
RPL17	9.77933e-20	0.308705	0.916	0.88	2.03302e-15	ribosomal protein L17 [Source:HGNC Symbol	3	Radial Glia
HIST1H2AL	8.24587e-20	-0.479955	0.723	0.836	1.71423e-15	histone cluster 1 H2A family member l [Source:HGNC Symbol	3	Radial Glia
AK4	7.31388e-20	-0.357787	0.38	0.577	1.52048e-15	adenylate kinase 4 [Source:HGNC Symbol	3	Radial Glia
DRAXIN	6.55015e-20	0.334707	0.947	0.852	1.36171e-15	dorsal inhibitory axon guidance protein [Source:HGNC Symbol	3	Radial Glia
HIST1H2AK	5.22608e-20	-0.438415	0.506	0.68	1.08645e-15	histone cluster 1 H2A family member k [Source:HGNC Symbol	3	Radial Glia
HIST2H2BF	4.05114e-20	-0.443334	0.617	0.797	8.42191e-16	histone cluster 2 H2B family member f [Source:HGNC Symbol	3	Radial Glia
STMN1	2.06595e-20	-0.360987	0.996	0.997	4.29489e-16	stathmin 1 [Source:HGNC Symbol	3	Radial Glia
HES1	6.17144e-21	-0.476197	0.492	0.702	1.28298e-16	hes family bHLH transcription factor 1 [Source:HGNC Symbol	3	Radial Glia
UBA1	5.69803e-21	0.304195	0.778	0.68	1.18456e-16	ubiquitin like modifier activating enzyme 1 [Source:HGNC Symbol	3	Radial Glia
GDF15	3.94796e-21	0.251987	0.326	0.119	8.20741e-17	growth differentiation factor 15 [Source:HGNC Symbol	3	Radial Glia
CD99	2.87292e-21	0.362314	0.85	0.746	5.97252e-17	CD99 molecule (Xg blood group) [Source:HGNC Symbol	3	Radial Glia
MT-CO1	1.04771e-21	0.391636	0.987	0.977	2.17808e-17	mitochondrially encoded cytochrome c oxidase I [Source:HGNC Symbol	3	Radial Glia
TMPO	6.68029e-22	-0.34875	0.952	0.976	1.38877e-17	thymopoietin [Source:HGNC Symbol	3	Radial Glia
SET	4.6835e-22	-0.267546	0.989	0.988	9.73653e-18	SET nuclear proto-oncogene [Source:HGNC Symbol	3	Radial Glia
GAPDH	4.22144e-22	-0.272202	0.994	0.996	8.77595e-18	glyceraldehyde-3-phosphate dehydrogenase [Source:HGNC Symbol	3	Radial Glia
YWHAE	2.38103e-22	-0.264569	0.985	0.981	4.94993e-18	tyrosine 3-monooxygenase/tryptophan 5-monooxygenase activation protein epsilon [Source:HGNC Symbol	3	Radial Glia
ODC1	1.8179e-22	0.294585	0.99	0.976	3.77923e-18	ornithine decarboxylase 1 [Source:HGNC Symbol	3	Radial Glia
LDHA	1.32124e-22	0.514059	0.724	0.537	2.74673e-18	lactate dehydrogenase A [Source:HGNC Symbol	3	Radial Glia
RAN	1.25478e-22	-0.253188	0.989	0.989	2.60857e-18	RAN; member RAS oncogene family [Source:HGNC Symbol	3	Radial Glia
SAT1	1.20329e-22	0.410196	0.764	0.57	2.50152e-18	spermidine/spermine N1-acetyltransferase 1 [Source:HGNC Symbol	3	Radial Glia
FGFBP3	1.16513e-22	0.543663	0.691	0.465	2.42218e-18	fibroblast growth factor binding protein 3 [Source:HGNC Symbol	3	Radial Glia
LINC00473	9.77967e-23	0.378892	0.52	0.295	2.0331e-18	NA	3	Radial Glia
GNAS	7.05256e-23	-0.252271	0.986	0.983	1.46616e-18	GNAS complex locus [Source:HGNC Symbol	3	Radial Glia
PLIN2	6.25196e-23	0.365611	0.644	0.422	1.29972e-18	perilipin 2 [Source:HGNC Symbol	3	Radial Glia
HIST1H2AE	5.82034e-23	-0.432707	0.743	0.873	1.20999e-18	histone cluster 1 H2A family member e [Source:HGNC Symbol	3	Radial Glia
HIST1H3G	4.90587e-23	-0.395975	0.925	0.948	1.01988e-18	histone cluster 1 H3 family member g [Source:HGNC Symbol	3	Radial Glia
USP11	2.49199e-23	0.365258	0.838	0.725	5.1806e-19	ubiquitin specific peptidase 11 [Source:HGNC Symbol	3	Radial Glia
RBBP7	2.35384e-23	0.384608	0.913	0.821	4.8934e-19	RB binding protein 7; chromatin remodeling factor [Source:HGNC Symbol	3	Radial Glia
CKB	2.00171e-23	-0.340565	0.992	0.993	4.16135e-19	creatine kinase B [Source:HGNC Symbol	3	Radial Glia
RPL22L1	1.38741e-23	0.417772	0.94	0.885	2.88428e-19	ribosomal protein L22 like 1 [Source:HGNC Symbol	3	Radial Glia
MAB21L1	1.1582e-23	-0.374551	0.115	0.335	2.40777e-19	mab-21 like 1 [Source:HGNC Symbol	3	Radial Glia
TCEAL2	6.83051e-24	-0.380789	0.241	0.475	1.42e-19	transcription elongation factor A like 2 [Source:HGNC Symbol	3	Radial Glia
HIST1H3F	5.12994e-24	-0.486054	0.705	0.85	1.06646e-19	histone cluster 1 H3 family member f [Source:HGNC Symbol	3	Radial Glia
TCF12	2.85234e-24	-0.420822	0.657	0.813	5.92974e-20	transcription factor 12 [Source:HGNC Symbol	3	Radial Glia
TMSB4X	2.16901e-24	0.400238	1	0.993	4.50915e-20	thymosin beta 4 X-linked [Source:HGNC Symbol	3	Radial Glia
MT-ND4	2.29899e-25	0.396318	0.983	0.972	4.77938e-21	mitochondrially encoded NADH:ubiquinone oxidoreductase core subunit 4 [Source:HGNC Symbol	3	Radial Glia
TXNIP	2.6553e-26	0.45786	0.803	0.569	5.5201e-22	thioredoxin interacting protein [Source:HGNC Symbol	3	Radial Glia
HIST1H4H	1.76031e-26	-0.386697	0.376	0.648	3.65952e-22	histone cluster 1 H4 family member h [Source:HGNC Symbol	3	Radial Glia
HOXA7	1.05083e-26	0.310217	0.446	0.188	2.18457e-22	homeobox A7 [Source:HGNC Symbol	3	Radial Glia
TMSB15A	5.42588e-27	-0.334493	0.986	0.983	1.12799e-22	thymosin beta 15a [Source:HGNC Symbol	3	Radial Glia
OTX2	4.08261e-27	-0.422112	0.194	0.453	8.48735e-23	orthodenticle homeobox 2 [Source:HGNC Symbol	3	Radial Glia
HOXA9	2.83772e-27	0.384813	0.491	0.23	5.89933e-23	homeobox A9 [Source:HGNC Symbol	3	Radial Glia
DLK1	1.96766e-27	1.04013	0.949	0.857	4.09056e-23	delta like non-canonical Notch ligand 1 [Source:HGNC Symbol	3	Radial Glia
HIST1H4D	1.72839e-27	-0.567218	0.707	0.85	3.59316e-23	histone cluster 1 H4 family member d [Source:HGNC Symbol	3	Radial Glia
EIF2S3	1.51378e-27	0.354193	0.899	0.764	3.147e-23	eukaryotic translation initiation factor 2 subunit gamma [Source:HGNC Symbol	3	Radial Glia
DCXR	6.32549e-28	0.414176	0.913	0.841	1.31501e-23	dicarbonyl and L-xylulose reductase [Source:HGNC Symbol	3	Radial Glia
PCSK1	3.81032e-28	-0.486146	0.097	0.299	7.92128e-24	proprotein convertase subtilisin/kexin type 1 [Source:HGNC Symbol	3	Radial Glia
HIST1H1B	5.09057e-29	-0.589384	0.99	0.985	1.05828e-24	histone cluster 1 H1 family member b [Source:HGNC Symbol	3	Radial Glia
DNAJA1	3.71467e-29	-0.352382	0.98	0.98	7.72243e-25	DnaJ heat shock protein family (Hsp40) member A1 [Source:HGNC Symbol	3	Radial Glia
HSP90AA1	2.90045e-29	-0.325713	0.999	0.996	6.02974e-25	heat shock protein 90 alpha family class A member 1 [Source:HGNC Symbol	3	Radial Glia
RUNX1T1	1.89377e-29	-0.450941	0.18	0.455	3.93695e-25	RUNX1 partner transcriptional co-repressor 1 [Source:HGNC Symbol	3	Radial Glia
GOPC	1.03982e-29	0.358196	0.688	0.418	2.16168e-25	golgi associated PDZ and coiled-coil motif containing [Source:HGNC Symbol	3	Radial Glia
ZNF682	5.50351e-30	0.308087	0.457	0.184	1.14413e-25	zinc finger protein 682 [Source:HGNC Symbol	3	Radial Glia
PGM5	9.05075e-31	-0.368139	0.079	0.318	1.88156e-26	phosphoglucomutase 5 [Source:HGNC Symbol	3	Radial Glia
RARRES2	1.65602e-32	0.576593	0.803	0.607	3.44269e-28	retinoic acid receptor responder 2 [Source:HGNC Symbol	3	Radial Glia
CRABP2	1.38427e-32	0.502241	0.814	0.599	2.87777e-28	cellular retinoic acid binding protein 2 [Source:HGNC Symbol	3	Radial Glia
SNCG	1.25694e-32	0.447095	0.481	0.21	2.61306e-28	synuclein gamma [Source:HGNC Symbol	3	Radial Glia
MT-CO3	3.62086e-33	0.564935	0.986	0.976	7.52741e-29	mitochondrially encoded cytochrome c oxidase III [Source:HGNC Symbol	3	Radial Glia
HIST1H3H	1.22922e-33	-0.51488	0.61	0.84	2.55544e-29	histone cluster 1 H3 family member h [Source:HGNC Symbol	3	Radial Glia
NUDT16	2.64206e-34	0.346357	0.605	0.316	5.49257e-30	nudix hydrolase 16 [Source:HGNC Symbol	3	Radial Glia
HIST2H2AC	2.42026e-35	-0.642971	0.969	0.989	5.03148e-31	histone cluster 2 H2A family member c [Source:HGNC Symbol	3	Radial Glia
ATP6AP2	1.13491e-36	0.436071	0.889	0.748	2.35937e-32	ATPase H+ transporting accessory protein 2 [Source:HGNC Symbol	3	Radial Glia
FTH1	4.37805e-37	-0.300797	0.994	0.995	9.10152e-33	ferritin heavy chain 1 [Source:HGNC Symbol	3	Radial Glia
PEG10	4.2285e-37	-0.952931	0.947	0.959	8.79063e-33	paternally expressed 10 [Source:HGNC Symbol	3	Radial Glia
DUSP15	4.03733e-37	0.376979	0.516	0.22	8.39322e-33	dual specificity phosphatase 15 [Source:HGNC Symbol	3	Radial Glia
SLC44A2	1.33157e-37	0.463792	0.783	0.514	2.76821e-33	solute carrier family 44 member 2 [Source:HGNC Symbol	3	Radial Glia
PRDX6	2.65993e-38	0.389732	0.97	0.959	5.52972e-34	peroxiredoxin 6 [Source:HGNC Symbol	3	Radial Glia
NGFRAP1	1.67292e-40	0.36521	0.986	0.987	3.47782e-36	NA	3	Radial Glia
MT-ND1	3.12155e-41	0.615494	0.975	0.957	6.48938e-37	mitochondrially encoded NADH:ubiquinone oxidoreductase core subunit 1 [Source:HGNC Symbol	3	Radial Glia
TMBIM4,1	4.06712e-42	0.314008	0.526	0.186	8.45514e-38	NA	3	Radial Glia
C1orf54	4.90614e-43	0.543919	0.816	0.61	1.01994e-38	chromosome 1 open reading frame 54 [Source:HGNC Symbol	3	Radial Glia
NEAT1	1.15903e-43	0.768854	0.876	0.712	2.40951e-39	nuclear paraspeckle assembly transcript 1 [Source:HGNC Symbol	3	Radial Glia
HIST1H2AJ	4.10183e-46	-0.635214	0.82	0.936	8.5273e-42	histone cluster 1 H2A family member j [Source:HGNC Symbol	3	Radial Glia
RPL39L	1.8686e-46	0.454238	0.596	0.238	3.88463e-42	ribosomal protein L39 like [Source:HGNC Symbol	3	Radial Glia
YBX1	1.64632e-47	-0.350161	0.994	0.993	3.42253e-43	Y-box binding protein 1 [Source:HGNC Symbol	3	Radial Glia
HIST1H2AM	1.40368e-47	-0.641206	0.792	0.917	2.91811e-43	histone cluster 1 H2A family member m [Source:HGNC Symbol	3	Radial Glia
MORF4L2	2.01109e-48	0.499753	0.972	0.916	4.18085e-44	mortality factor 4 like 2 [Source:HGNC Symbol	3	Radial Glia
PCLO	1.58237e-48	0.603429	0.775	0.487	3.28959e-44	piccolo presynaptic cytomatrix protein [Source:HGNC Symbol	3	Radial Glia
HIST1H3D	3.35338e-51	-0.895121	0.986	0.992	6.97134e-47	histone cluster 1 H3 family member d [Source:HGNC Symbol	3	Radial Glia
RN7SL1	3.19723e-51	-0.650685	0.509	0.781	6.64671e-47	RNA component of signal recognition particle 7SL1 [Source:HGNC Symbol	3	Radial Glia
HIST1H3B	2.2033e-52	-0.705647	0.97	0.973	4.58044e-48	histone cluster 1 H3 family member b [Source:HGNC Symbol	3	Radial Glia
GPC3	2.57026e-55	0.743914	0.814	0.446	5.34332e-51	glypican 3 [Source:HGNC Symbol	3	Radial Glia
EIF1AX	1.28876e-57	0.492444	0.979	0.956	2.67921e-53	eukaryotic translation initiation factor 1A X-linked [Source:HGNC Symbol	3	Radial Glia
RPS6	7.94532e-61	0.359046	1	0.999	1.65175e-56	ribosomal protein S6 [Source:HGNC Symbol	3	Radial Glia
TMEM47	1.6131e-61	0.724242	0.835	0.595	3.35348e-57	transmembrane protein 47 [Source:HGNC Symbol	3	Radial Glia
EDNRB	6.68016e-63	0.581337	0.591	0.175	1.38874e-58	endothelin receptor type B [Source:HGNC Symbol	3	Radial Glia
SLC25A6	6.68904e-64	0.566772	0.977	0.931	1.39058e-59	solute carrier family 25 member 6 [Source:HGNC Symbol	3	Radial Glia
PRDX4	9.18762e-65	0.58259	0.969	0.872	1.91001e-60	peroxiredoxin 4 [Source:HGNC Symbol	3	Radial Glia
BTF3	2.67338e-67	0.548596	0.993	0.957	5.55769e-63	basic transcription factor 3 [Source:HGNC Symbol	3	Radial Glia
MEIS2	1.95089e-67	-0.976318	0.57	0.842	4.05571e-63	Meis homeobox 2 [Source:HGNC Symbol	3	Radial Glia
HIST1H2AG	4.87013e-68	-0.873261	0.947	0.983	1.01245e-63	histone cluster 1 H2A family member g [Source:HGNC Symbol	3	Radial Glia
CHCHD2	1.03346e-96	-0.785604	0.907	0.976	2.14847e-92	coiled-coil-helix-coiled-coil-helix domain containing 2 [Source:HGNC Symbol	3	Radial Glia
7SK,2	1.4704e-168	-1.63072	0.949	0.968	3.05681e-164	NA	3	Radial Glia
NR2F2	1.37596e-06	-0.253163	0.531	0.655	0.0286049	nuclear receptor subfamily 2 group F member 2 [Source:HGNC Symbol	1	Radial Glia
RND2	1.19524e-06	-0.380693	0.654	0.662	0.0248479	Rho family GTPase 2 [Source:HGNC Symbol	1	Radial Glia
CTGF	1.03221e-06	-0.325267	0.471	0.539	0.0214586	NA	1	Radial Glia
ZEB1	9.63946e-07	-0.270087	0.391	0.499	0.0200395	zinc finger E-box binding homeobox 1 [Source:HGNC Symbol	1	Radial Glia
JUNB	4.0793e-07	0.289297	0.611	0.527	0.00848045	JunB proto-oncogene; AP-1 transcription factor subunit [Source:HGNC Symbol	1	Radial Glia
TCEAL7	3.43511e-07	0.258934	0.574	0.504	0.00714124	transcription elongation factor A like 7 [Source:HGNC Symbol	1	Radial Glia
KPNA2	3.07175e-07	-0.350845	0.514	0.628	0.00638585	karyopherin subunit alpha 2 [Source:HGNC Symbol	1	Radial Glia
HIST1H1C	2.80959e-07	-0.252477	0.302	0.433	0.00584085	histone cluster 1 H1 family member c [Source:HGNC Symbol	1	Radial Glia
TMEM158	2.53632e-07	-0.318631	0.326	0.443	0.00527276	transmembrane protein 158 (gene/pseudogene) [Source:HGNC Symbol	1	Radial Glia
ORC6	1.17167e-07	-0.280407	0.306	0.412	0.00243578	origin recognition complex subunit 6 [Source:HGNC Symbol	1	Radial Glia
HN1	8.78468e-08	-0.255183	0.942	0.953	0.00182625	NA	1	Radial Glia
KIAA0101	8.62465e-08	-0.355029	0.282	0.399	0.00179298	NA	1	Radial Glia
NCAM1	8.42245e-08	-0.281345	0.178	0.28	0.00175094	neural cell adhesion molecule 1 [Source:HGNC Symbol	1	Radial Glia
LRRTM2	5.65513e-08	0.257806	0.31	0.198	0.00117565	leucine rich repeat transmembrane neuronal 2 [Source:HGNC Symbol	1	Radial Glia
TUBA1B	4.99078e-08	-0.273773	0.993	0.986	0.00103753	tubulin alpha 1b [Source:HGNC Symbol	1	Radial Glia
MASP1	3.6266e-08	-0.296699	0.13	0.227	0.000753934	mannan binding lectin serine peptidase 1 [Source:HGNC Symbol	1	Radial Glia
SRGAP3	2.95378e-08	-0.272286	0.595	0.723	0.00061406	SLIT-ROBO Rho GTPase activating protein 3 [Source:HGNC Symbol	1	Radial Glia
UCHL1	2.35651e-08	-0.274454	0.501	0.623	0.000489895	ubiquitin C-terminal hydrolase L1 [Source:HGNC Symbol	1	Radial Glia
GDF15	2.14472e-08	0.314436	0.301	0.177	0.000445866	growth differentiation factor 15 [Source:HGNC Symbol	1	Radial Glia
CLU	1.8383e-08	0.384174	0.751	0.66	0.000382165	clusterin [Source:HGNC Symbol	1	Radial Glia
HIST1H1E	1.3737e-08	-0.276303	0.318	0.457	0.000285579	histone cluster 1 H1 family member e [Source:HGNC Symbol	1	Radial Glia
ZC3H12C	9.17792e-09	-0.281302	0.213	0.343	0.0001908	zinc finger CCCH-type containing 12C [Source:HGNC Symbol	1	Radial Glia
HNRNPU	8.4732e-09	-0.258743	0.811	0.889	0.000176149	heterogeneous nuclear ribonucleoprotein U [Source:HGNC Symbol	1	Radial Glia
CBX5	6.82641e-09	-0.260407	0.641	0.734	0.000141914	chromobox 5 [Source:HGNC Symbol	1	Radial Glia
ITM2C	6.11381e-09	0.25377	0.599	0.523	0.0001271	integral membrane protein 2C [Source:HGNC Symbol	1	Radial Glia
LYPD1	5.35298e-09	-0.319747	0.166	0.288	0.000111283	LY6/PLAUR domain containing 1 [Source:HGNC Symbol	1	Radial Glia
RANBP1	4.82216e-09	-0.272617	0.883	0.91	0.000100248	RAN binding protein 1 [Source:HGNC Symbol	1	Radial Glia
MLLT11	4.77177e-09	-0.280077	0.576	0.699	9.92004e-05	MLLT11 transcription factor 7 cofactor [Source:HGNC Symbol	1	Radial Glia
CBX3	4.47614e-09	-0.258594	0.787	0.85	9.30544e-05	chromobox 3 [Source:HGNC Symbol	1	Radial Glia
CXCR4	4.4451e-09	-0.344508	0.611	0.733	9.24092e-05	C-X-C motif chemokine receptor 4 [Source:HGNC Symbol	1	Radial Glia
CARHSP1	4.02322e-09	-0.27297	0.665	0.765	8.36387e-05	calcium regulated heat stable protein 1 [Source:HGNC Symbol	1	Radial Glia
C16orf80	2.78904e-09	-0.255952	0.464	0.614	5.79813e-05	NA	1	Radial Glia
SMARCA5	2.20644e-09	-0.259945	0.795	0.862	4.58697e-05	SWI/SNF related; matrix associated; actin dependent regulator of chromatin; subfamily a; member 5 [Source:HGNC Symbol	1	Radial Glia
CCNG1	2.19558e-09	0.260511	0.854	0.8	4.5644e-05	cyclin G1 [Source:HGNC Symbol	1	Radial Glia
HIST1H2AG	1.65493e-09	-0.290364	0.187	0.317	3.44043e-05	histone cluster 1 H2A family member g [Source:HGNC Symbol	1	Radial Glia
LINC00461	1.61479e-09	-0.3287	0.589	0.72	3.35698e-05	long intergenic non-protein coding RNA 461 [Source:HGNC Symbol	1	Radial Glia
SH3BGRL3	1.60208e-09	-0.283605	0.652	0.786	3.33056e-05	SH3 domain binding glutamate rich protein like 3 [Source:HGNC Symbol	1	Radial Glia
BZW1	1.19193e-09	-0.256014	0.742	0.836	2.4779e-05	basic leucine zipper and W2 domains 1 [Source:HGNC Symbol	1	Radial Glia
EPHA3	6.58434e-10	-0.251068	0.243	0.395	1.36882e-05	EPH receptor A3 [Source:HGNC Symbol	1	Radial Glia
NCKAP5	5.56051e-10	-0.331332	0.229	0.351	1.15598e-05	NCK associated protein 5 [Source:HGNC Symbol	1	Radial Glia
PHF6	5.50373e-10	-0.276314	0.623	0.739	1.14417e-05	PHD finger protein 6 [Source:HGNC Symbol	1	Radial Glia
SYT1	4.78926e-10	-0.427038	0.477	0.596	9.9564e-06	synaptotagmin 1 [Source:HGNC Symbol	1	Radial Glia
HIST1H4C	4.38692e-10	-0.510079	0.772	0.862	9.11997e-06	histone cluster 1 H4 family member c [Source:HGNC Symbol	1	Radial Glia
CD99	3.4948e-10	0.26587	0.793	0.739	7.26535e-06	CD99 molecule (Xg blood group) [Source:HGNC Symbol	1	Radial Glia
C4orf48	3.17586e-10	-0.279258	0.781	0.874	6.60231e-06	chromosome 4 open reading frame 48 [Source:HGNC Symbol	1	Radial Glia
CALB2	2.65156e-10	-0.672452	0.041	0.13	5.51233e-06	calbindin 2 [Source:HGNC Symbol	1	Radial Glia
BEX2	2.64267e-10	0.299107	0.749	0.66	5.49385e-06	brain expressed X-linked 2 [Source:HGNC Symbol	1	Radial Glia
METRN	1.93784e-10	-0.326647	0.773	0.86	4.02857e-06	meteorin; glial cell differentiation regulator [Source:HGNC Symbol	1	Radial Glia
DEK	1.84757e-10	-0.32794	0.839	0.882	3.84091e-06	DEK proto-oncogene [Source:HGNC Symbol	1	Radial Glia
EIF4G2	1.34649e-10	-0.282069	0.824	0.897	2.79922e-06	eukaryotic translation initiation factor 4 gamma 2 [Source:HGNC Symbol	1	Radial Glia
CENPU	1.21543e-10	-0.252833	0.153	0.271	2.52675e-06	centromere protein U [Source:HGNC Symbol	1	Radial Glia
PSME2	8.0274e-11	0.25415	0.586	0.538	1.66882e-06	proteasome activator subunit 2 [Source:HGNC Symbol	1	Radial Glia
PNRC1	5.73443e-11	-0.294287	0.658	0.797	1.19213e-06	proline rich nuclear receptor coactivator 1 [Source:HGNC Symbol	1	Radial Glia
DPF1	5.43879e-11	0.252004	0.33	0.235	1.13067e-06	double PHD fingers 1 [Source:HGNC Symbol	1	Radial Glia
ARRDC3	3.96752e-11	0.303243	0.553	0.448	8.24807e-07	arrestin domain containing 3 [Source:HGNC Symbol	1	Radial Glia
QPRT	3.49972e-11	0.270179	0.805	0.757	7.27558e-07	quinolinate phosphoribosyltransferase [Source:HGNC Symbol	1	Radial Glia
IER2	3.03787e-11	0.350868	0.852	0.8	6.31543e-07	immediate early response 2 [Source:HGNC Symbol	1	Radial Glia
H1FX	2.94536e-11	-0.330584	0.833	0.915	6.1231e-07	H1 histone family member X [Source:HGNC Symbol	1	Radial Glia
HMGB1	2.85183e-11	-0.353164	0.991	0.989	5.92867e-07	high mobility group box 1 [Source:HGNC Symbol	1	Radial Glia
ZNF667-AS1	2.77052e-11	0.272845	0.483	0.341	5.75964e-07	ZNF667 antisense RNA 1 (head to head) [Source:HGNC Symbol	1	Radial Glia
TUBB	1.83868e-11	-0.288681	0.989	0.994	3.82243e-07	tubulin beta class I [Source:HGNC Symbol	1	Radial Glia
ERBB4	1.76699e-11	-0.254221	0.124	0.251	3.67339e-07	erb-b2 receptor tyrosine kinase 4 [Source:HGNC Symbol	1	Radial Glia
[truncated: 1,175 more rows]

## Sheet: DE genes_E326K-WT
gene	p_val	avg_log2FC	pct,1	pct,2	p_val_adj	description	Cluster	Identity
[truncated: 2,226 more rows]
